# Supplementary material for: Harmonizing Labeling and Analytical Strategies to Obtain Protein Turnover Rates in Intact Adult Animals
Source: PubMed Central journal article supplement (PMC9249856; doi:10.1016/j.mcpro.2022.100252), 2022-05-28

1433E – AAFDDAIAELDTLSEESYK\_2

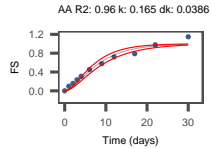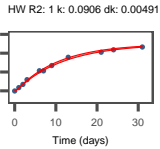

1433G – TAFDDAIAELDTLNEDSYK\_2

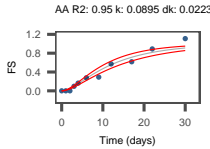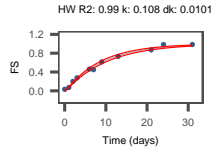

2AAA – DNTIEHLLPLFLAQLK\_3

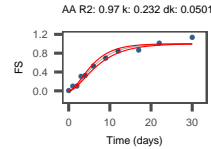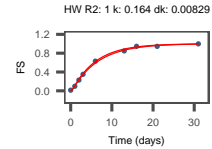

1433E – EAAENSLVAYK\_2

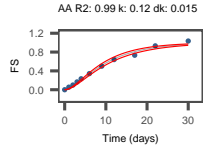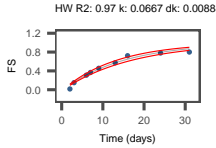

1433G – TAFDDAIAELDTLNEDSYK\_3

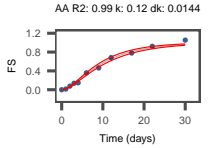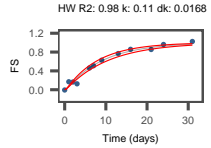

2AAA(Non-Unique) – QLSQSLPAIVELAEDA\_K\_3

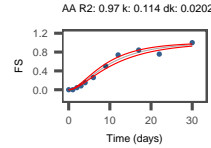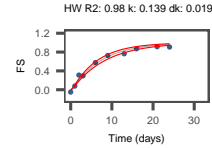

1433E – YDEMVESMK\_2

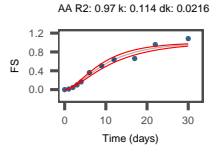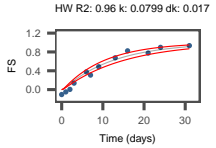

1433G(Non-Unique) – YDDMAAMK\_2

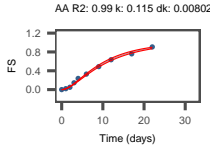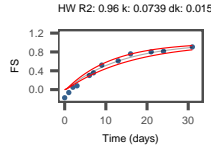

2AAA – SALASVIMGLSPILGK\_2

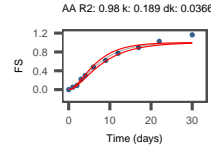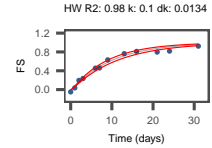

1433G – AYSEAHEISK\_2

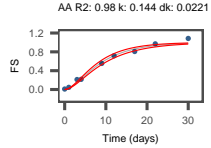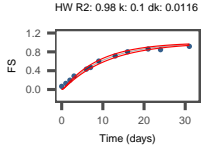

1433Z – DICNDVLSLEK\_2

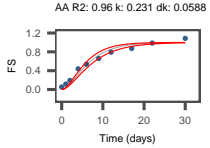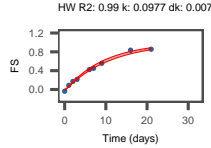

6PGL – IVAPISDPKPPQR\_3

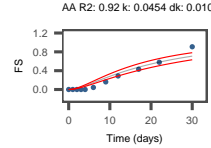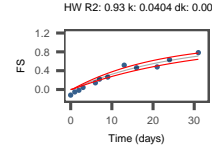

1433G – AYSEAHEISK\_3

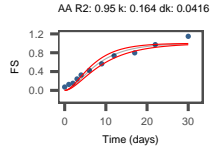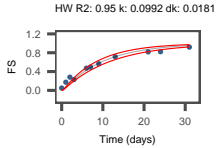

1433Z – TAFDEAIAELDTLSEESYK\_3

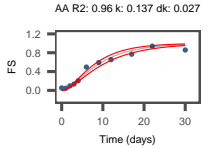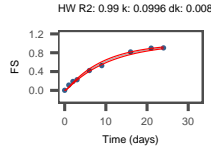

A1AT2 – ELDQDTVFALANYLKF\_3

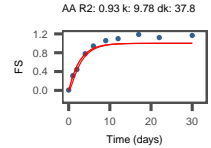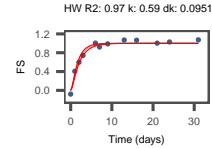

1433G – ELEAVQCDVLSLLDNYLIK\_3

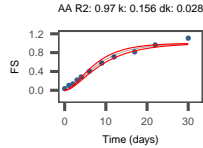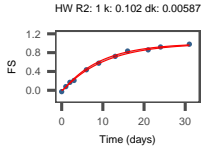

1433Z – YDDMAAMK\_2

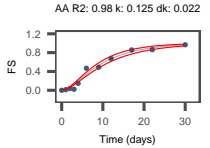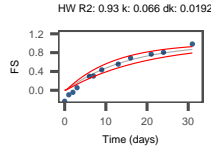

A1AT2(Non-Unique) – MQHLEQLTNK\_2

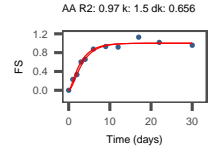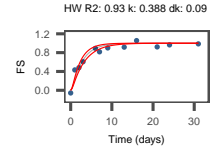

AATC - APPSVFAQVPQAPPVLVK\_2

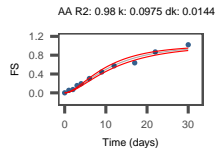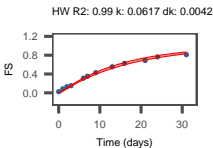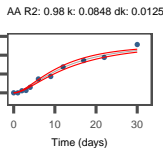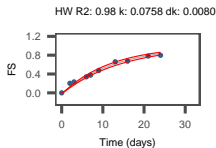

AATM - NLFAFFDMAYQGFASGDGDK\_3

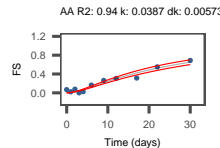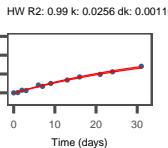

AATC - APPSVFAQVPQAPPVLVK\_3

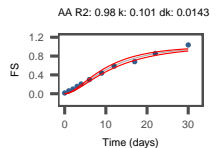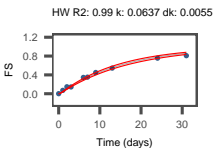

AATC - NLDYVATSIHEAVTK\_2

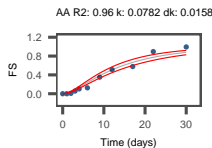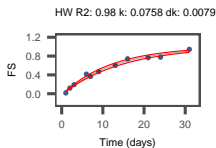

AATM - QWLQEVK\_2

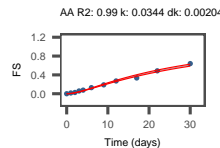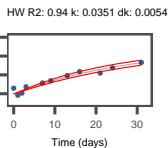

AATC - AQVPQAPPVLVK\_2

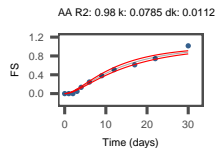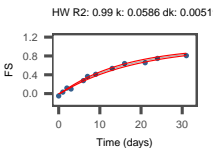

AATC - NLDYVATSIHEAVTK\_3

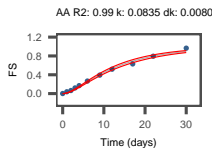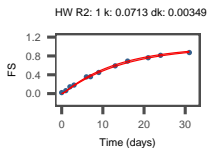

AATM - SSWWTHVEMGPPDILGVTEAFK\_2

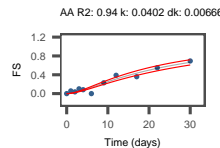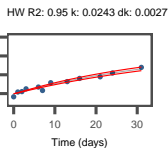

AATC - FLFPFFDSAYQGFASGDLEK\_2

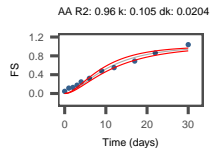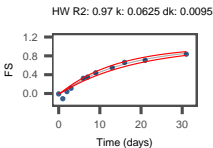

AATC - VGNLTVGK\_2

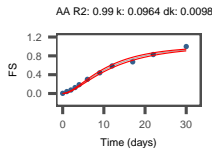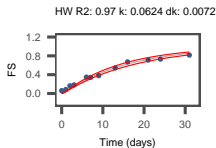

AATM - TCGDFSGALEDISK\_2

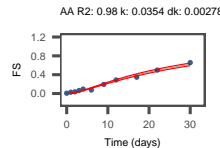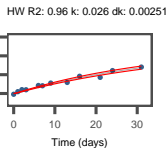

AATC - FLFPFFDSAYQGFASGDLEK\_3

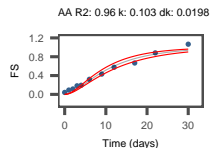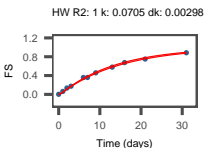

AATC - YFVSEGFELFCAQFSFK\_2

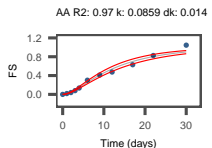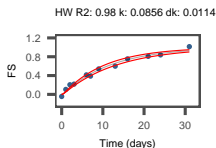

AATM - VGAVTVCK\_2

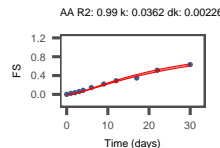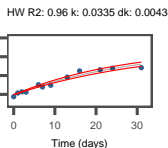

AATC - INMGLTK\_2

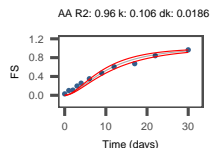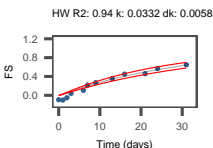

AATM - EIASVVK\_2

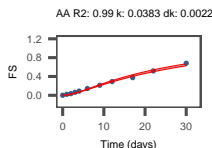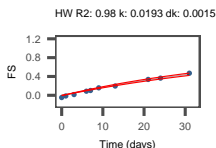

ABC7 - QALIDMNTLFTLLK\_2

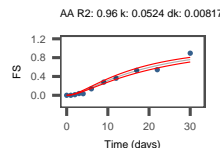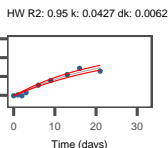



ACADV - IHNFGVIEQK\_3

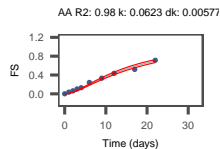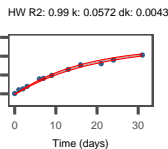

ACADV - VPSENVLGEVGDGFK\_2

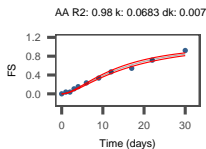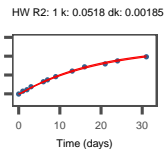

ACON - DHLVPDQGQYDQVIEINLNLKPH\_4

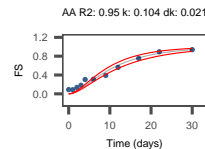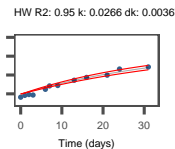

ACADV - NPFNGVLLMGAEAGK\_2

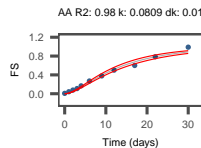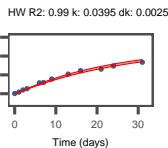

ACBP - TQPTDEEMLIYSHFK\_3

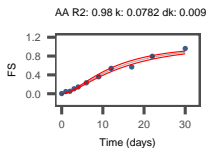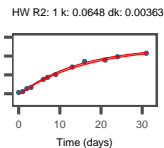

ACON - DLEDLILIK\_2

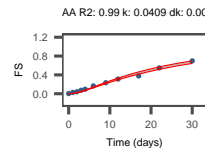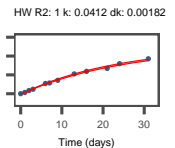

ACADV - SGELAVQALDQFATVVEAK\_3

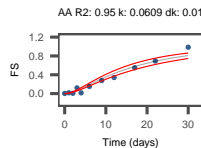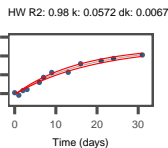

ACDSB - IGTYIEGASNIQLNTIAK\_2

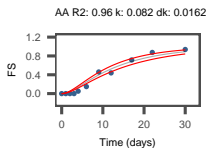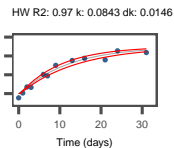

ACON - FKLEAPDADELPR\_3

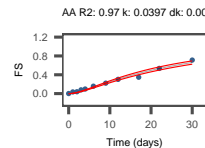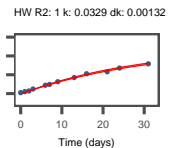

ACADV - SLSEGYPTAQHEK\_2

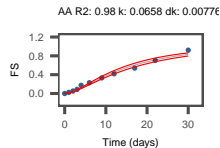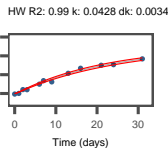

ACO13 - VTLVSAPEK\_2

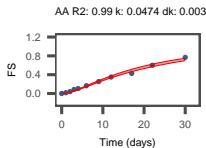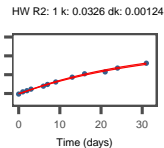

ACON - LNRPLTSEK\_2

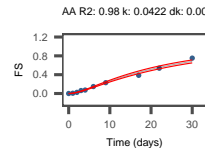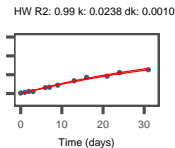

ACADV - SLSEGYPTAQHEK\_3

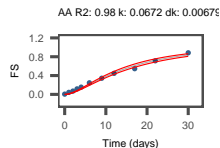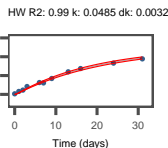

ACON - CTTDHISAAGPWLK\_2

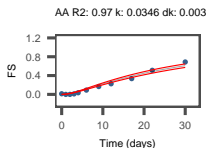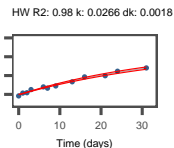

ACON - LNRPLTSEK\_3

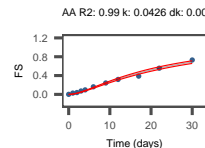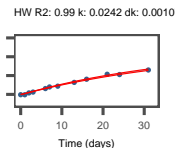

ACADV - VADECIQMGGMFMK\_2

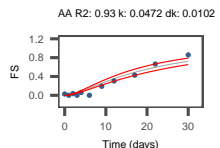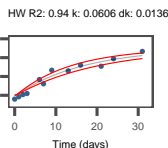

ACON - CTTDHISAAGPWLK\_3

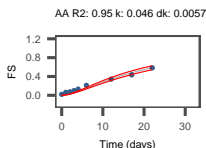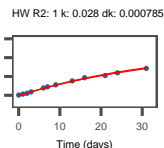

ACON - LQLLEPFDK\_2

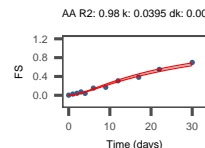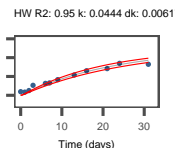



ACSL1 – EVAELAEICGSLIQQ\_3

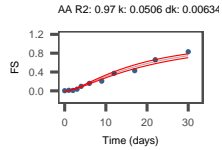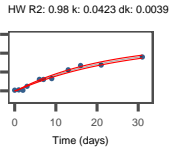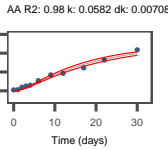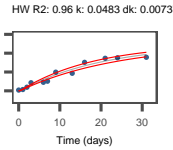

ACTN2 – ASTHETWAYGK\_3

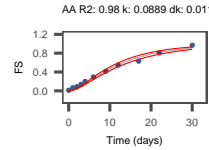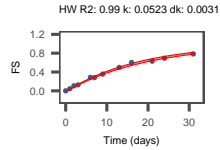

ACSL1 – GAMITHQNIINDCSGFIK\_3

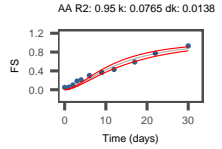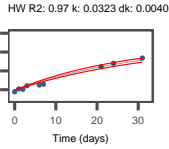

ACTA(Non-Unique) – ESAGIHETTYNSIMK\_3

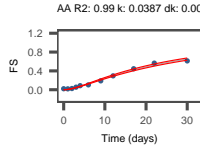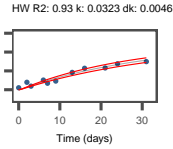

ACTN2 – HRPDLIDYSK\_2

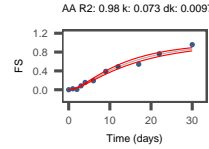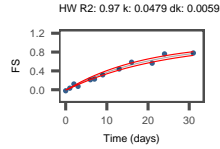

ACSL1 – LIAVVPDVESLPSWAQK\_2

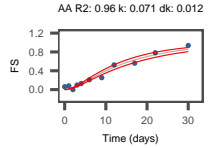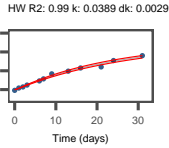

ACTA(Non-Unique) – VAPEEHPTLLTEAPLNPK\_2

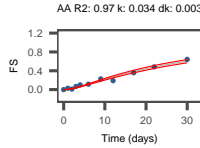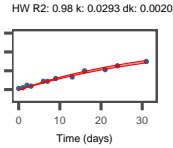

ACTN2 – HRPDLIDYSK\_3

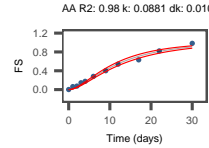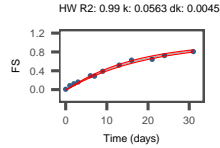

ACSL1 – LIAVVPDVESLPSWAQK\_3

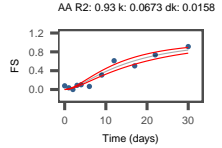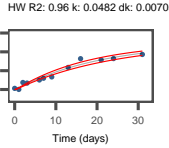

ACTA(Non-Unique) – YPIEHGITNWDDEMK\_2

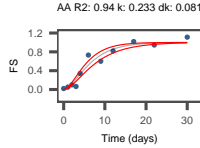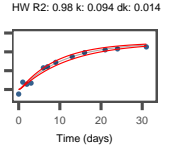

ACTN2 – ILASDKPYLAELR\_2

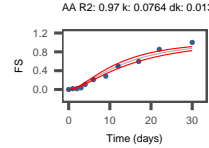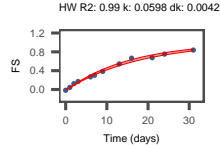

ACSL1 – LLLLEGVENK\_2

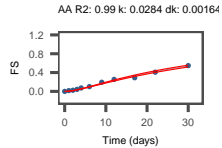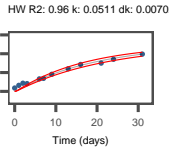

ACTN2 – AIGPWIQNK\_2

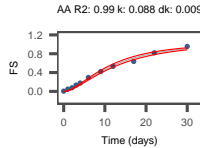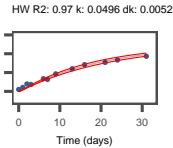

ACTN2 – ILASDKPYLAELR\_3

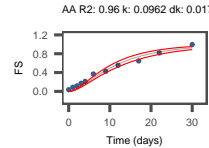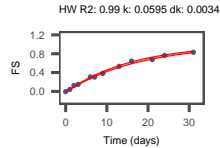

ACSL1 – LVDVEEMNYLASK\_2

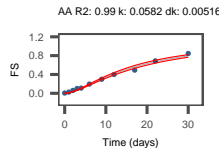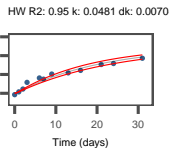

ACTN2 – ALDYASK\_2

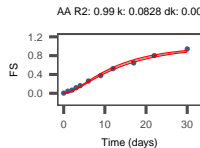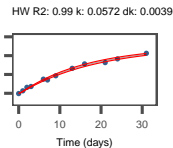

ACTN2 – ISNRPAPMSEGK\_3

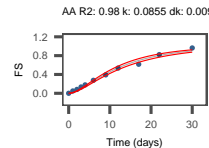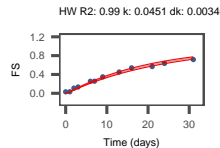

ACTN2 – LLETIDLHLEFAK\_2

AA R2: 0.99 k: 0.0644 dk: 0.00576

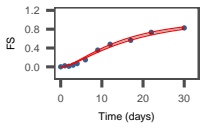

HW R2: 0.99 k: 0.0691 dk: 0.0075

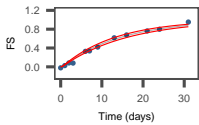

ACTN3(Non-Unique) – DLLLDPAWEK\_2

AA R2: 0.97 k: 0.0758 dk: 0.0107

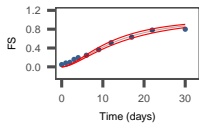

HW R2: 0.99 k: 0.0719 dk: 0.0043

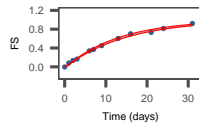

ADT1 – DEGANAFFK\_2

AA R2: 0.99 k: 0.0391 dk: 0.00221

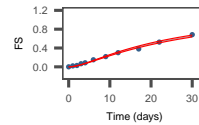

HW R2: 0.99 k: 0.0294 dk: 0.0013

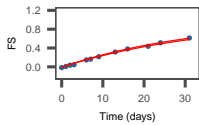

ACTN2 – LLETIDLHLEFAK\_3

AA R2: 0.96 k: 0.0957 dk: 0.0175

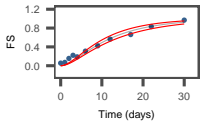

HW R2: 0.98 k: 0.0814 dk: 0.0106

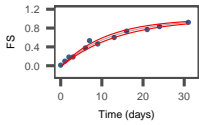

ACTN4(Non-Unique) – KHEAFESDLAAHQDR\_2

AA R2: 0.97 k: 0.0617 dk: 0.00874

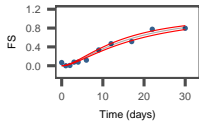

HW R2: 0.94 k: 0.0538 dk: 0.0121

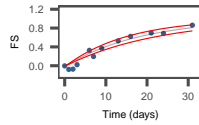

ADT1 – DFLAGGIAAVSK\_3

AA R2: 0.99 k: 0.0378 dk: 0.0024

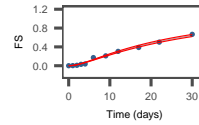

HW R2: 0.92 k: 0.0232 dk: 0.0039

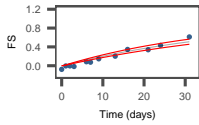

ACTN2 – MLDAEDIVNTPKDER\_3

AA R2: 0.98 k: 0.0819 dk: 0.0109

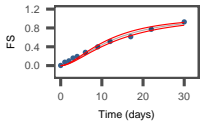

HW R2: 0.96 k: 0.0681 dk: 0.0098

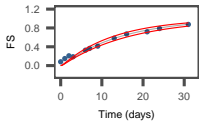

ACTN4(Non-Unique) – KHEAFESDLAAHQDR\_4

AA R2: 0.98 k: 0.0765 dk: 0.00951

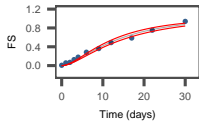

HW R2: 0.99 k: 0.059 dk: 0.00341

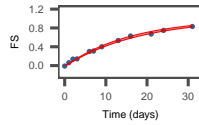

ADT1(Non-Unique) – LLLQVQHASK\_3

AA R2: 0.99 k: 0.0384 dk: 0.00225

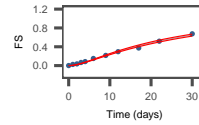

HW R2: 1 k: 0.0316 dk: 0.00128

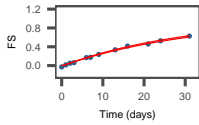

ACTN2 – QSILAIQNEVK\_2

AA R2: 0.99 k: 0.0723 dk: 0.00685

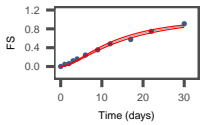

HW R2: 0.99 k: 0.0611 dk: 0.0043

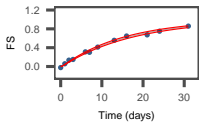

ACTZ(Non-Unique) – TLFSNIVLGGGSLFK\_3

AA R2: 0.94 k: 0.108 dk: 0.0296

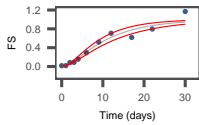

HW R2: 0.92 k: 0.0884 dk: 0.0254

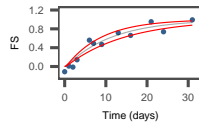

ADT1(Non-Unique) – VLVLVDEIK\_2

AA R2: 0.99 k: 0.0405 dk: 0.00252

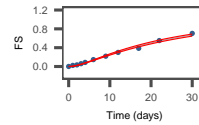

HW R2: 0.98 k: 0.0435 dk: 0.0037

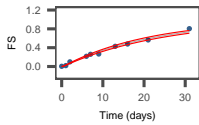

ACTN2 – QEYHNIINYK\_2

AA R2: 0.99 k: 0.0743 dk: 0.00636

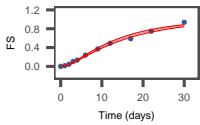

HW R2: 0.99 k: 0.0618 dk: 0.0056

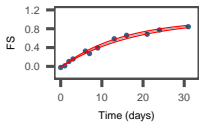

ACYP1 – GTVQGQLGQPSVK\_2

AA R2: 0.98 k: 0.0452 dk: 0.00351

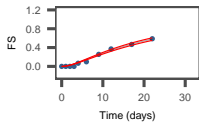

HW R2: 0.96 k: 0.0586 dk: 0.0094

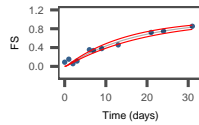

ADT2 – DFLAGVAAAIK\_2

AA R2: 0.96 k: 0.0493 dk: 0.00591

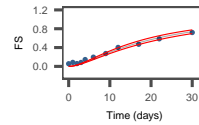

HW R2: 0.99 k: 0.0307 dk: 0.0020

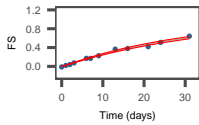

ACTN2 – SSIQITGALEDQMNQLK\_3

AA R2: 0.98 k: 0.0815 dk: 0.0106

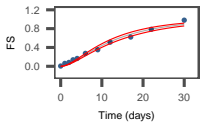

HW R2: 0.98 k: 0.0631 dk: 0.0067

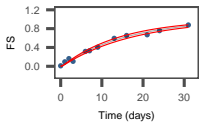

ADK – VEYHAGGSTQNSMK\_3

AA R2: 0.96 k: 0.136 dk: 0.0302

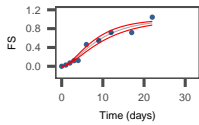

HW R2: 0.92 k: 0.0996 dk: 0.0244

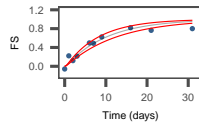

AIFM1 – ELWFSDDPNVK\_2

AA R2: 0.97 k: 0.0389 dk: 0.00411

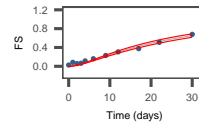

HW R2: 0.96 k: 0.0289 dk: 0.0029

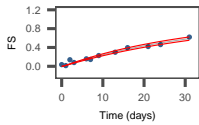

AL1A7(Non-Unique) - VTLELGGK\_2

ALBU - ENYGELADCCTK\_2

ALBU - QTALAEVVK\_2

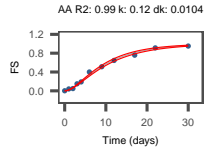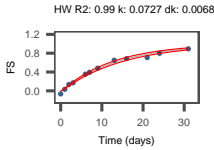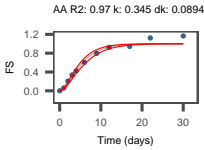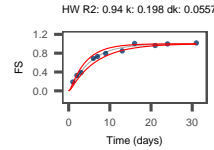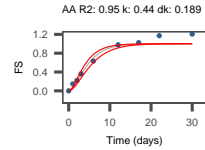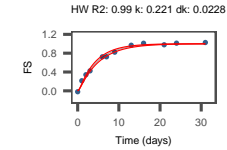

AL4A1 - ASGTNDKPGGPHYLR\_3

ALBU - GLVLIASFQYLQK\_2

ALBU - RPCFSALTVDETYVPK\_2

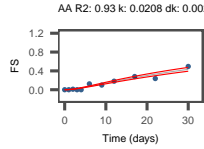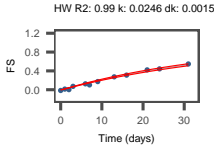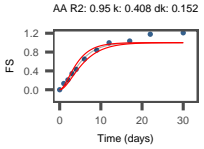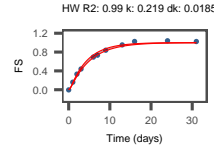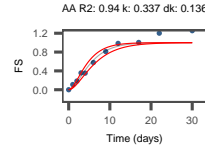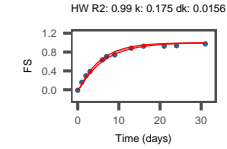

AL4A1 - WTSPQVIK\_2

ALBU - GLVLIASFQYLQK\_3

ALBU - SALTVDETYVPK\_2

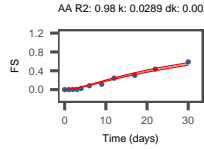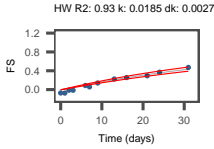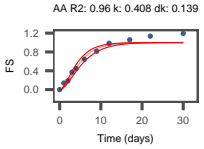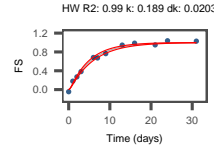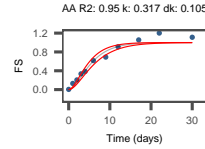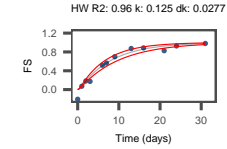

ALBU - AADKDTCFSTEGPNLVR\_3

ALBU - LATDLTK\_2

ALBU - TCVADESAANCDK\_2

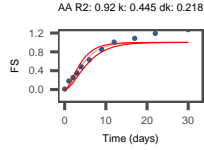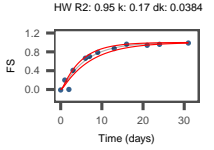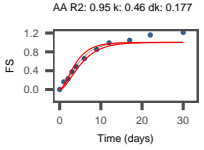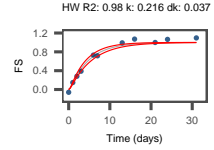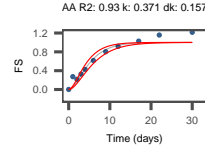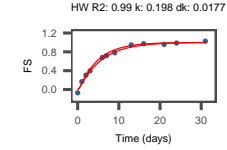

ALBU - AETTFHSDICTLPEK\_2

ALBU - LSQTFPNADFAEITK\_2

ALBU - TNCDLYEK\_2

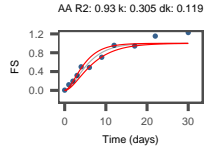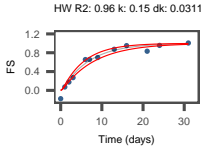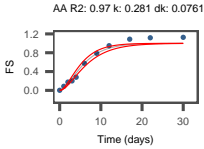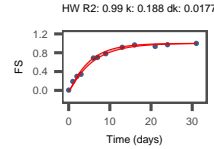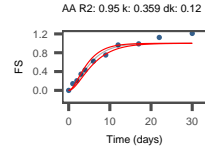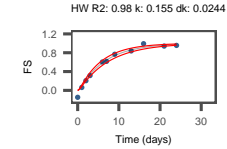

ALBU - AETTFHSDICTLPEK\_3

ALBU - LVQEVTDFAK\_2

ALBU - TPVSEHVTK\_2

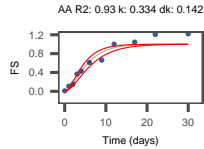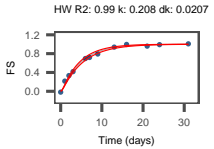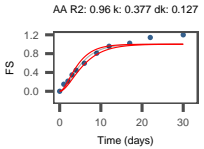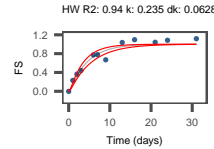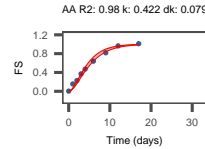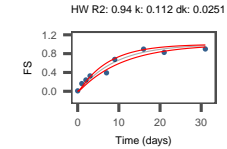



ALBU - TVMDDFAQLDTCCK\_3

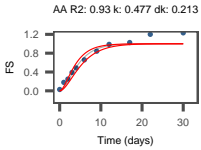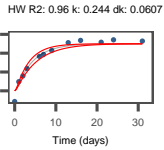

ALDH2 - VAFTGSTEVGHLIQAAGSSNLK\_3

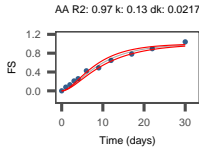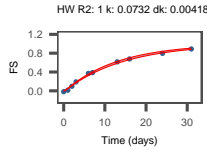

ALDOA\_RABIT,sp|P05064|ALDOA(Non-Unique) - GILAADESTSIAK\_2

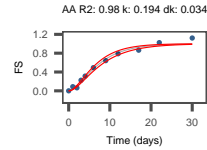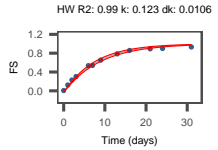

ALBU - YM[15.9949]CENQATISSK\_2

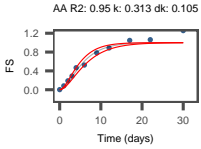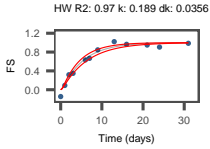

ALDOA - AAQEEYIK\_2

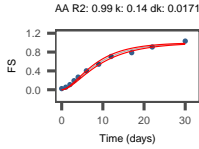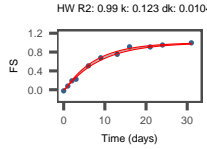

ALDOA\_RABIT,sp|P05064|ALDOA(Non-Unique) - IGGVILFHETLYQK\_2

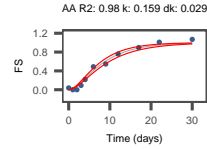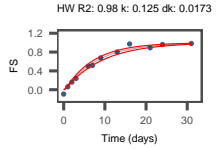

ALBU\_HUMAN,sp|P07724|ALBU(Non-Unique) - NECFLQHK\_3

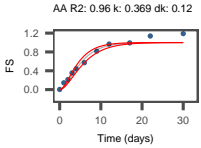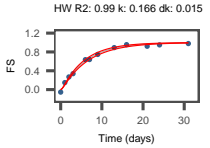

ALDOA - PHPYPALTPEQK\_2

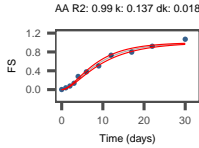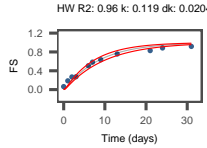

ALDOA\_RABIT,sp|P05064|ALDOA(Non-Unique) - IGGVILFHETLYQK\_3

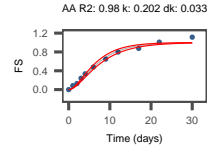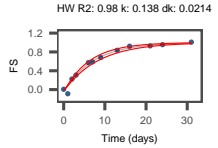

ALDH2 - ELGEYGLQAYTEVK\_2

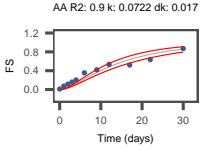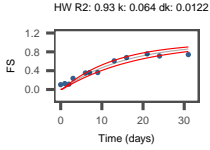

ALDOA\_RABIT,sp|P05064|ALDOA(Non-Unique) - ADDGRFPQVIK\_2

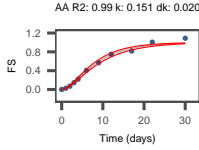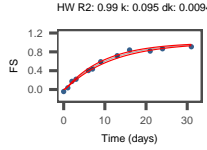

ALDOA\_RABIT,sp|P05064|ALDOA(Non-Unique) - KELSIDIHR\_3

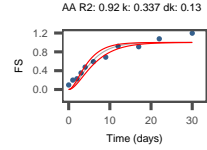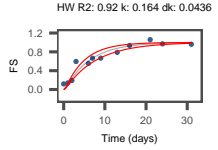

ALDH2 - GYFIQTVFGDVK\_2

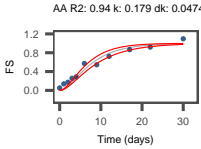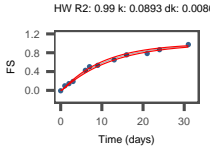

ALDOA\_RABIT,sp|P05064|ALDOA(Non-Unique) - ALQAADIDK\_2

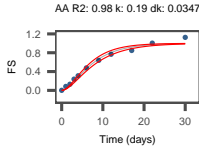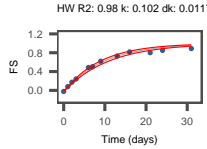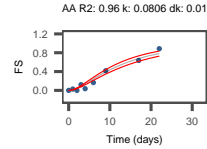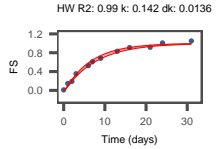

ALDH2 - LGPALATGNVVMK\_2

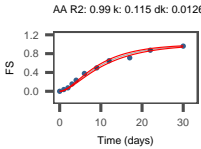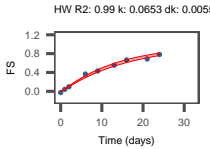

ALDOA\_RABIT,sp|P05064|ALDOA(Non-Unique) - CPLLPKWALTF\_ALDOA\_RABIT,sp|P05064|ALDOA(Non-Unique) - VNPCIGGVILFHETLYQK

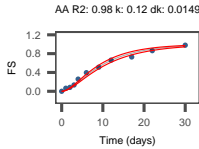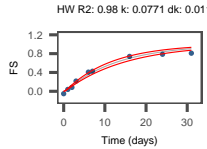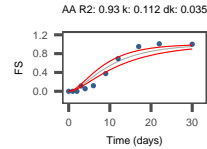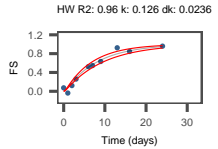



ARF3(Non-Unique) – NISFTVWDVGGQDK\_2

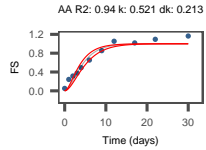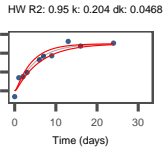

AT1A3(Non-Unique) – NLEAVETLSTSTIGSDK\_2

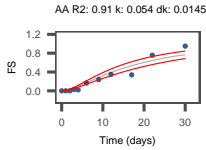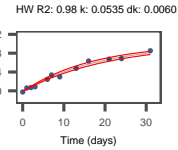

AT2A2(Non-Unique) – EYEPEMGK\_2

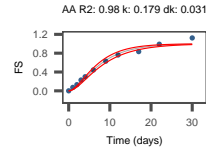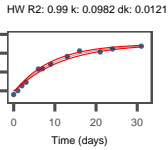

ARHL1 – HMAEYQEHWFYFEAK\_3

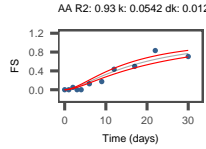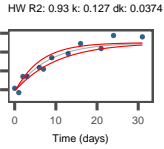

AT1A3(Non-Unique) – QGAIVAVTGDGVNDSPALK\_2

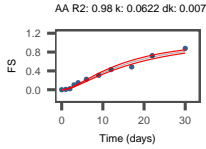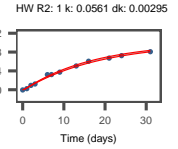

AT2A2 – FGVNESTGLSLEQVK\_2

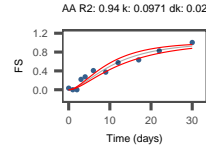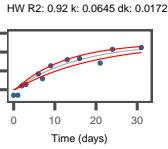

AT1A1 – AVAGDASESALLK\_2

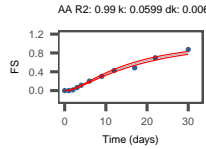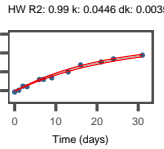

AT2A2(Non-Unique) – ALCNDSALDYNEAK\_2

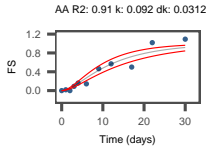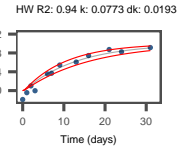

AT2A2 – IEVASSVK\_2

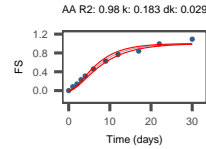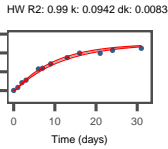

AT1A1 – EQPLDEELKDAFQNAVLELGLGER\_3

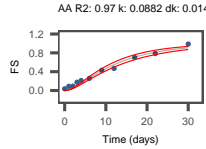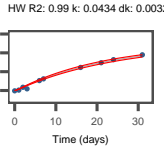

AT2A2(Non-Unique) – CNDSALDYNEAK\_2

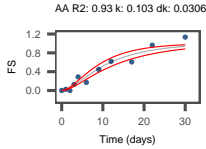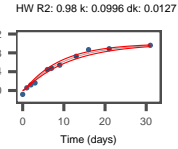

AT2A2 – ISLPVILMDETLK\_2

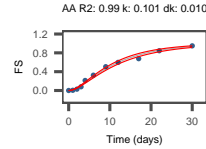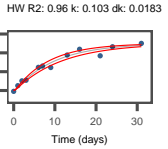

AT1A1 – IVEIPFNSTNK\_2

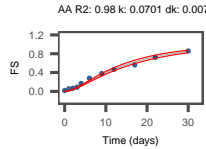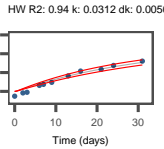

AT2A2 – DIVPGDIVEIAGDK\_2

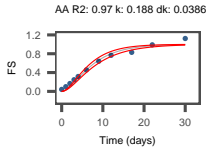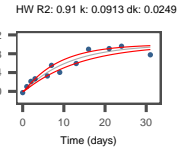

AT2A2 – NLTQWLMLVK\_2

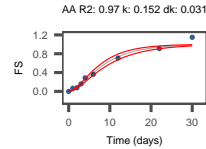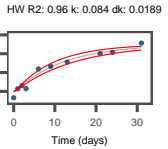

AT1A3(Non-Unique) – DGPNALTPPTTPEWVK\_2

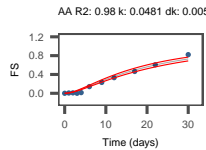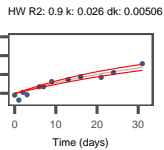

AT2A2 – DIVPGDIVEIAGDKVPADIR\_3

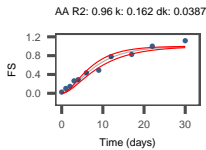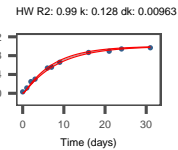

AT2A2 – SEIGIAMSGTAVAK\_2

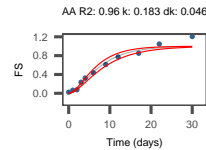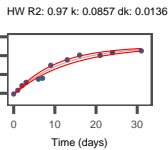

AT2A2 – SEIGIAMSGTAVAK\_3

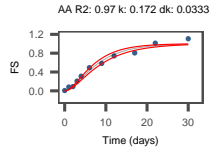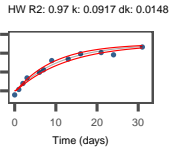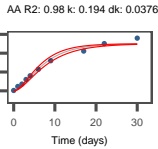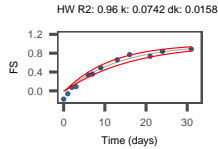

AT5F1 – PLPLPPEYGGK\_2

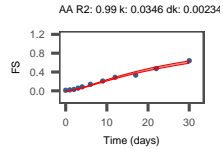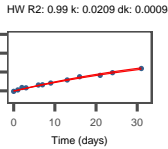

AT2A2 – SITGSTYAPIGEVQK\_2

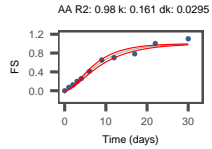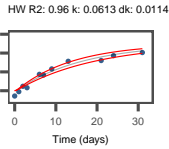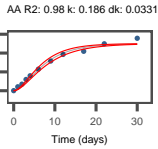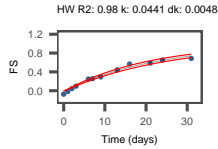

AT5F1 – QIQDAIDMEK\_2

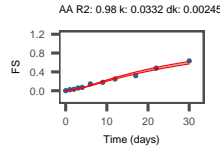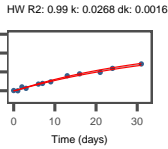

AT2A2(Non-Unique) – SLPSVELTGCTSVICSDK\_2

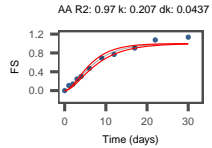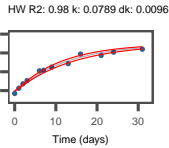

AT2A2 – VSFYQLSHFLQCK\_3

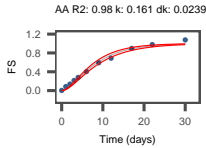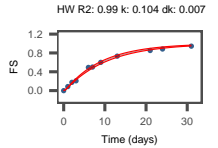

AT5F1 – TGVTPPYVLTGLSLYFLSK\_2

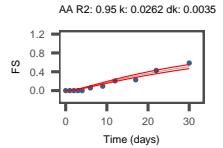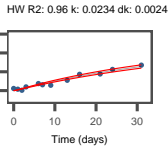

AT2A2 – TVEEVLFHGFVNSTGLSLEQVK\_2

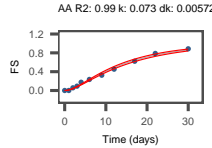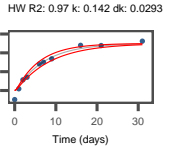

AT2A2 – WGSNELPAEEGK\_2

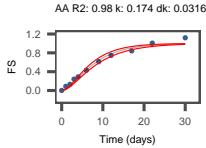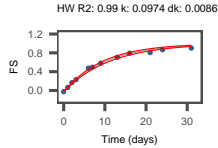

ATP5H – IPVPEDK\_2

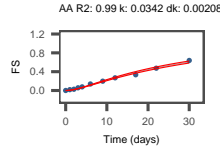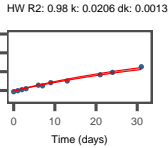

AT2A2(Non-Unique) – VDQSILTGESVVIK\_2

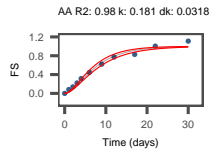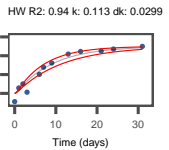

AT5F1 – IAQLEEVK\_2

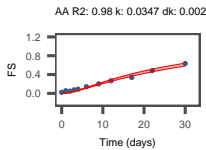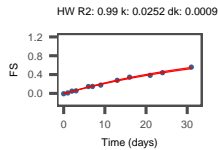

ATP5H – KYPYWPHQPIENL\_2

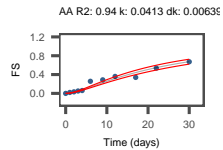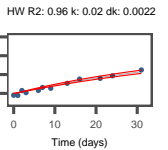

AT2A2 – VEGDTCLSNEFISITGYAPIGEVQK\_2

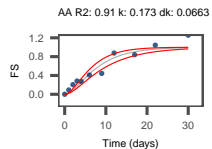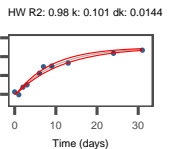

AT5F1 – LGLIPEEFFQLYPK\_3

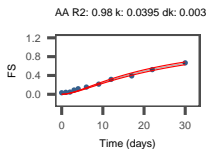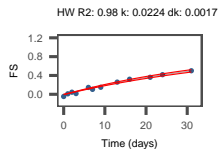

ATP5H – LALSKEPPAIDWAY\_2

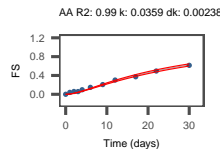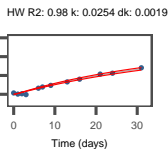

ATP5H – LASLSEKPPAIDWAYR\_2

ATP5J – GEMDTFPTFK\_2

ATPB – EGNPLYHEM[15.9949]JESGVINLK\_3

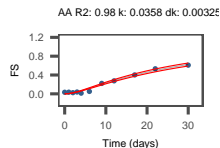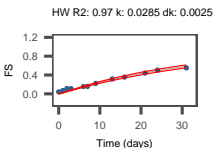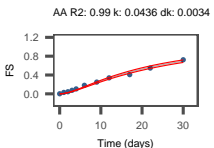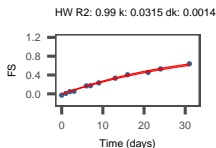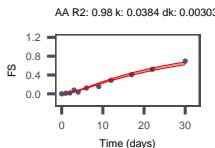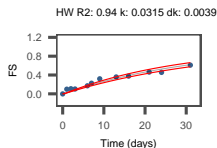

ATP5H – PGLVDDFEK\_2

ATP5L – APSMVAAAVTYSK\_2

ATPB – SLQDIIALGM[15.9949]DELSEEDKLTYSR\_3

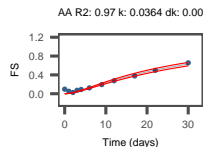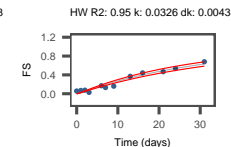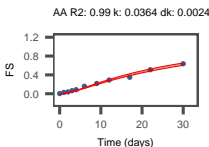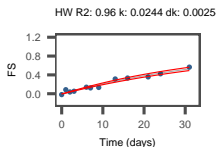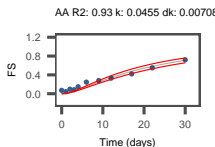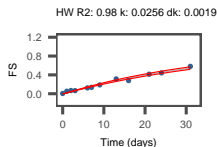

ATP5I – MVPPVQVSPLIK\_2

ATP5L – LATFWHYAK\_3

ATPB – SLQDIIALGMDELSEEDK\_2

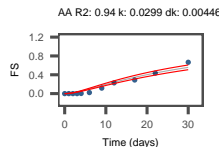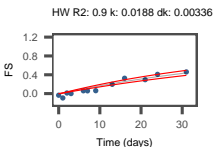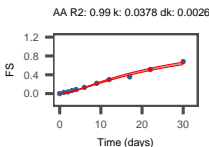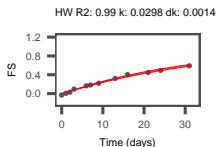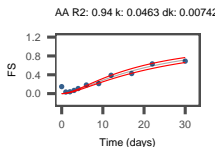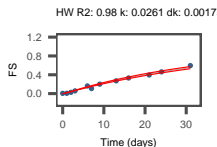

ATP5I – VPPVQVSPLIK\_2

ATP5L – VELVPTPAEIPTAIQSVK\_2

ATPB – TREGNDLYHEMIESGVINLK\_4

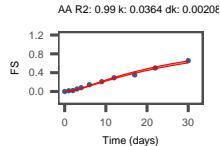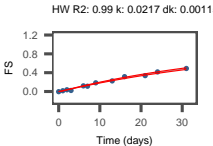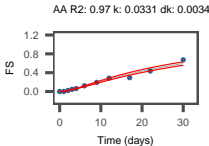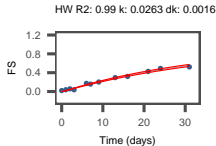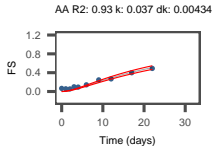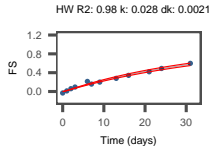

ATP5I – YSALIIGMAYGAK\_2

ATPA – LKEIVTNFLAGFEP\_2

ATPB – YMVGPPIEAVAK\_2

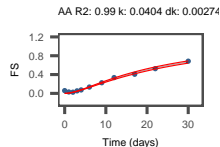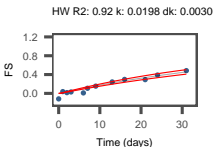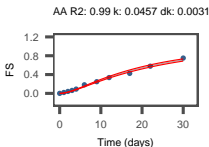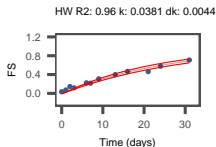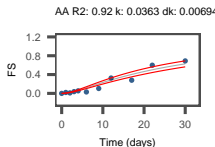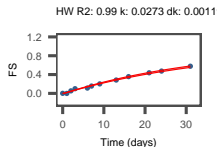

ATP5J – FEVIDKQPS\_2

ATPA – TSAIDTINQK\_3

ATPD – ASPQTQVFFDSANVK\_2

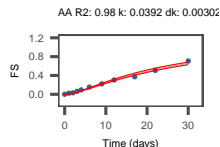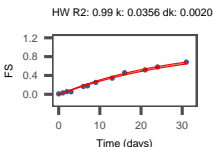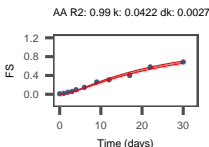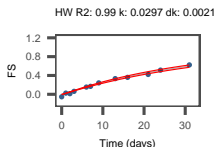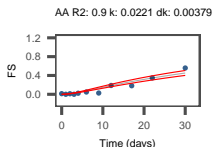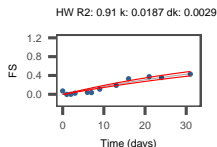

ATPD - IEANEALVK\_2

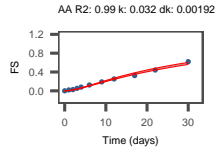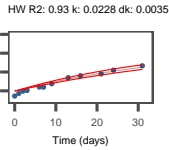

ATPO - GEVPTVTASPLDDAVLSELK\_2

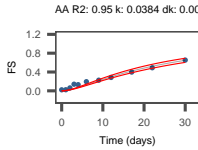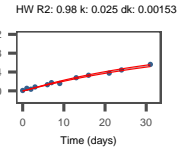

BOLA3 - TVQHQHMVNQALK\_3

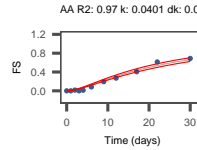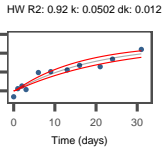

ATPD - PGLVVVHTEDGTTTK\_3

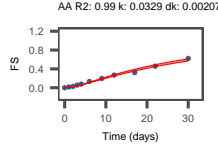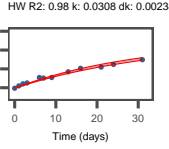

ATPO - VSLAVLNPKYK\_2

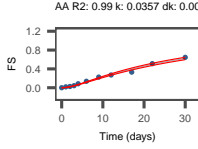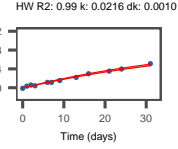

C560 - HLLWDLGK\_2

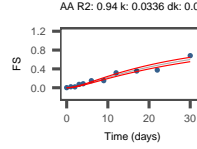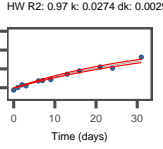

ATPD - SFTFASPTQVFFDSANVK\_2

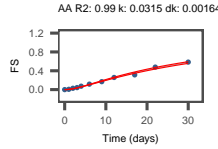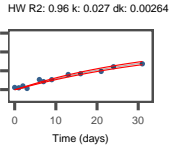

BAG3 - AAPSPAPAEPAAPK\_2

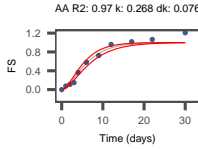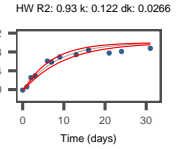

C560 - NTSSNRPLSPHLTIYK\_4

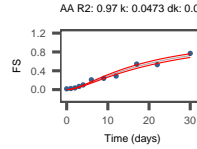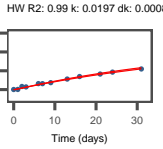

ATPG - GLCGAIHSSVAK\_2

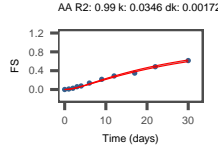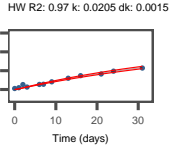

BAG3 - THYPAQQGEYQPQPVYHK\_4

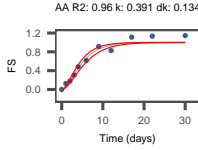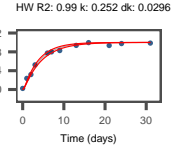

CACP - GMGDSTVPEQK\_2

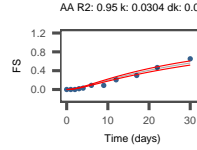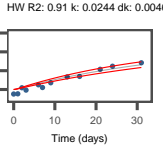

ATPG - GLCGAIHSSVAK\_3

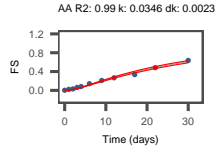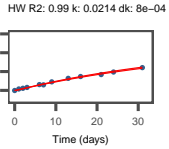

BCAT2 - TFTDHMLMVEWNNK\_3

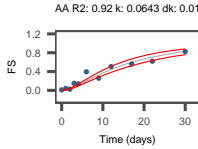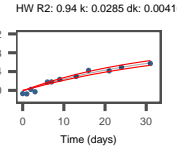

CACP - MENWLSEWWLK\_2

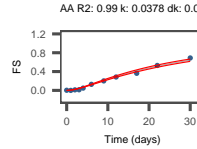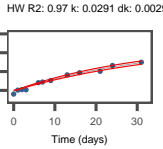

ATPG - TEEKPIFSLN\_2

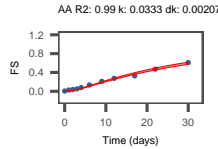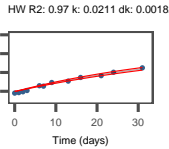

BIP - SQIFSTASDNQPTVTIK\_2

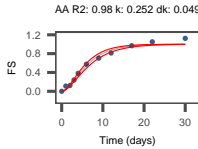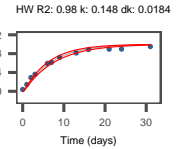

CACP - NHVAGQLHGGGSK\_3

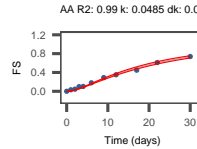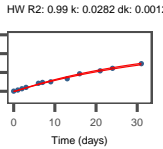

CACP - QPVVIYSSPGVILPK\_2

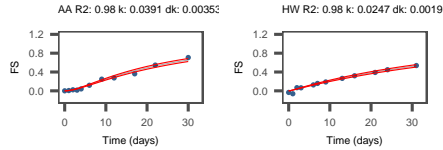

CALM1(Non-Unique) - MKDTSDEEIR\_3

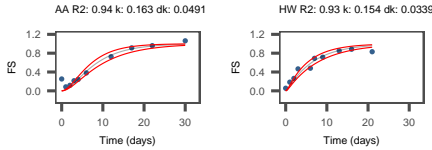

CATD - AYWQVHMDQLVEGNELTLCK\_3

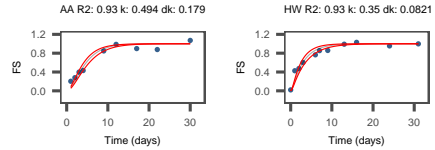

CACP - SIFTCLDK\_2

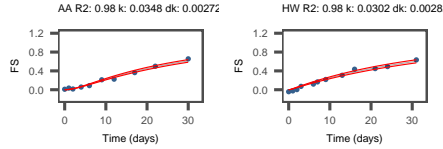

CALR - HEQNIDCGGGYVK\_3

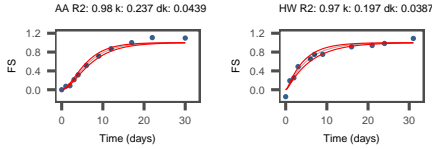

CATD - ILDIACWVHHK\_3

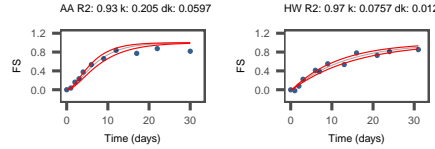

CACP - SPMVPLPMPK\_2

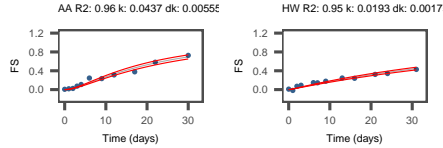

CASQ2 - AFQEAHFQPIYK\_3

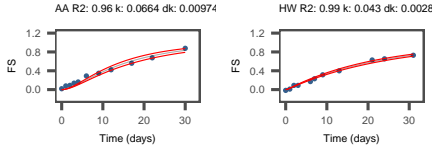

CATD - PQGIVFVAAK\_2

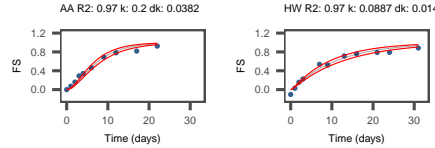

CAD13 - MFYIDPEKGDIVTVSPALLDR\_3

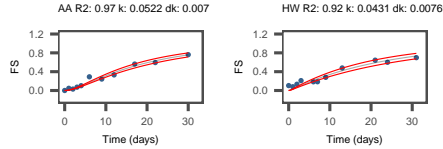

CASQ2 - EEGLNFTYDGK\_2

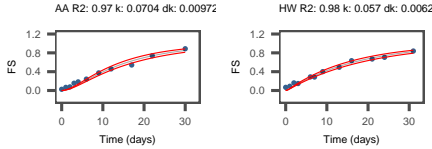

CAV1 - AMADEVTEK\_2

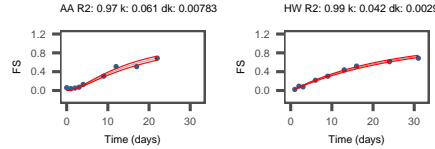

CADH2 - MFVLTVAAENQVPLAK\_2

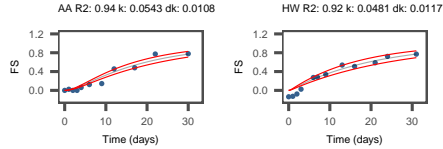

CASQ2 - EIVLELVQVLEHK\_3

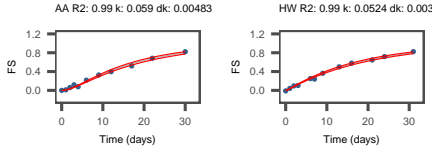

CAV1(Non-Unique) - EIDLNRDPK\_2

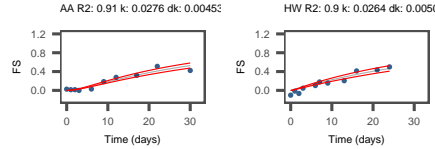

CAH2\_HUMAN\_sp|P09020|CAH2(Non-Unique) - AVQQPDGLAVLGIPLK\_2

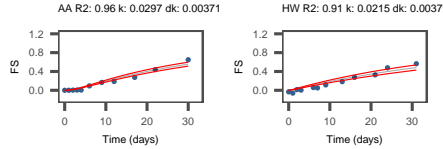

CASQ2 - RYDLLCLYHEPVSSDK\_3

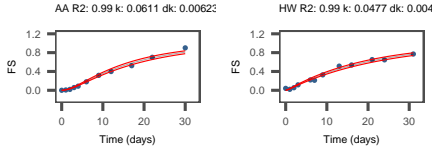

CAV1 - HLNDVVK\_2

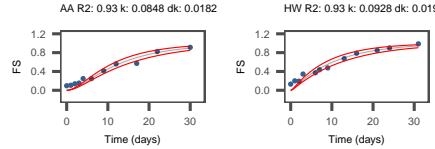

CAVN1 - ATEEPSGTGSDLELIK\_2

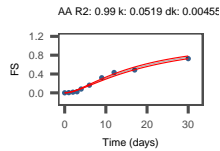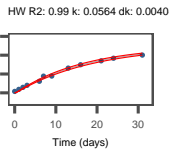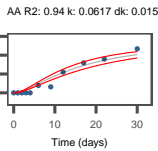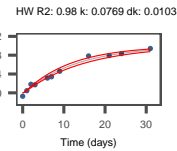

CH10 - VLQATVVAVGSGGK\_2

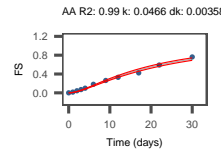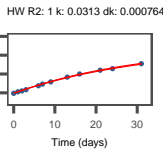

CAVN1 - KLEVNEALLR\_2

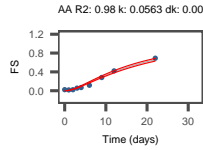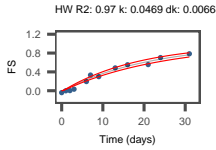

CAZA2 - FTVPSTTQVVGILK\_2

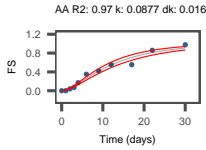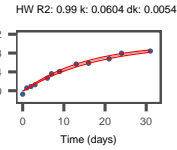

CH10 - VVLLDKDYFLFR\_3

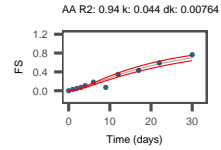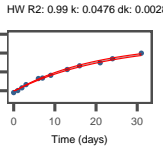

CAVN1 - QAEMEGAVSQIGELSK\_2

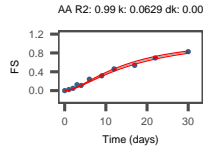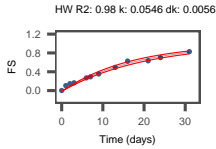

CD36 - EGKPVYISLPH\_3

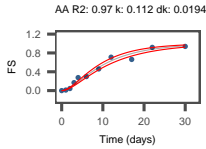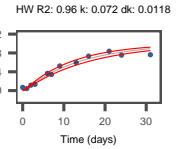

CH60 - ALMLQGVLLADAVAVTMGPK\_2

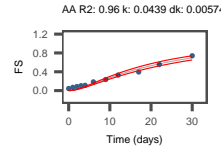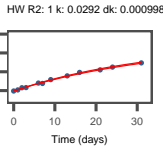

CAVN1 - VMIYQDEVK\_2

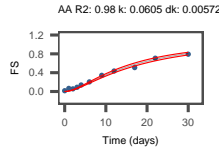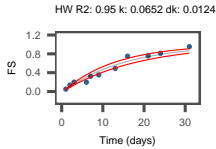

CD36 - LQVNILVK\_2

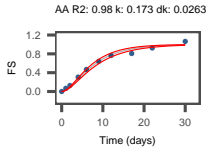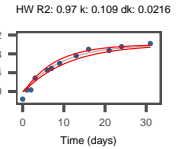

CH60 - CEFQDAYVLLSEK\_3

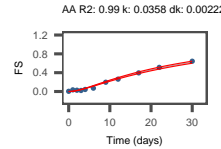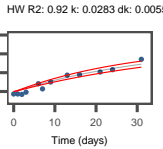

CAVN1 - VPPFTFHKV\_3

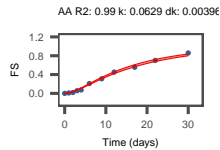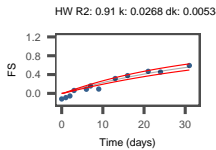

CD36 - SFVQVVLNSLIK\_2

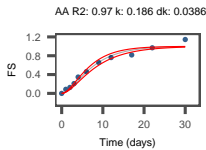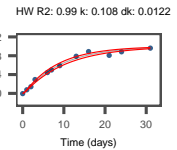

CH60 - DIGNIISDAMK\_2

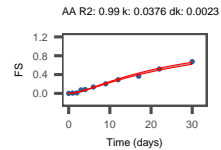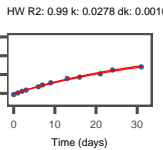

CAVN2 - VLIFQEESIAPSVFKV\_2

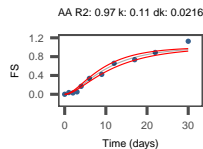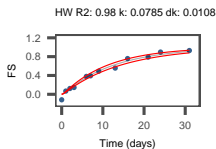

CH10 - VLLPEYGGTK\_2

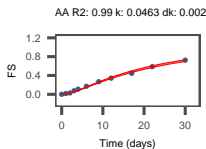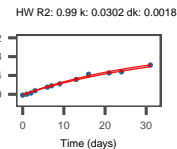

CH60 - GVMLDAVDIAELK\_2

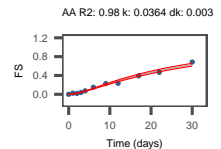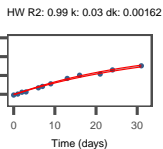



CH60 – GVMLAVIDAIEALK\_3

CH60 – VGGTSDVNEVK\_2

CLH1 – NLQNLLILTAIK\_2

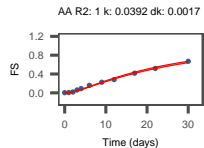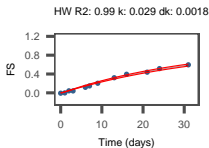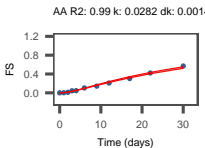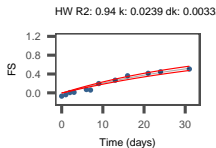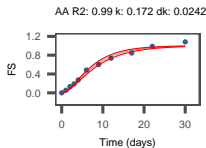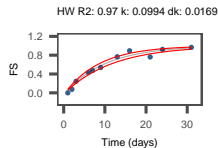

CH60 – IGIEIHK\_2

CISD1 – HNEETGDNVGLPIIK\_3

CLYBL – IQWAEELIAAFK\_2

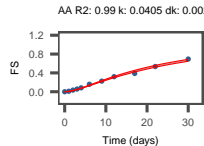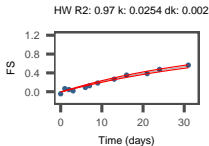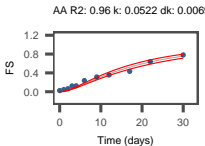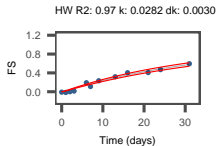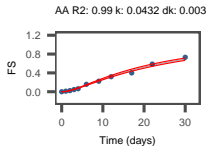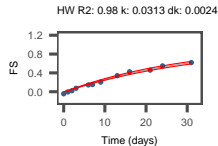

CH60 – ILQSSSEVGYDAMLGDFVNMVEK\_2

CISD1 – VVHAFDMEDLGDK\_3

CMC1 – FGLYLPK\_2

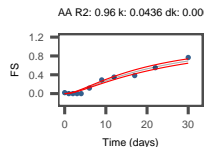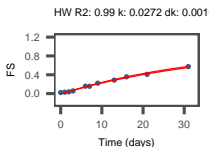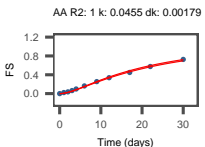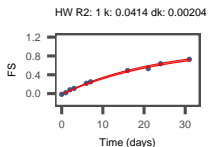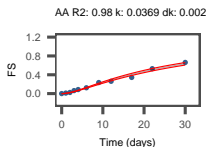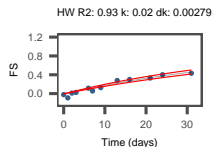

CH60 – ILQSSSEVGYDAMLGDFVNMVEK\_3

CISY – ALGFPLERP\_3

CMC1 – FTLGSVAGAVGATAVYPIDLVK\_2

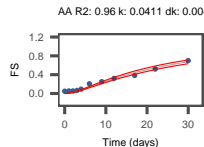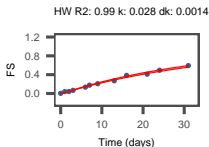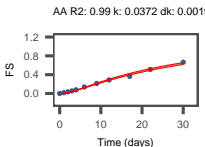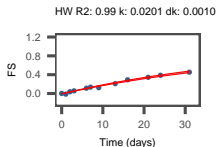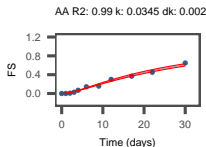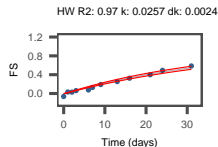

CH60 – NAGVEGSLIVEK\_2

CISY – DVLSNLIPIK\_2

CMC1(Non-Unique) – GLIPLQIGVAPEK\_2

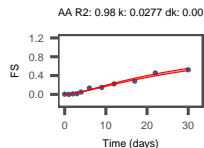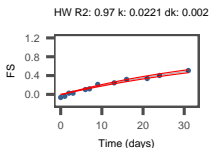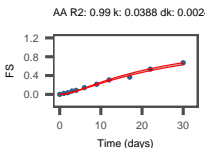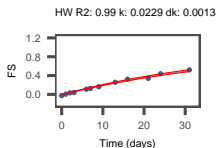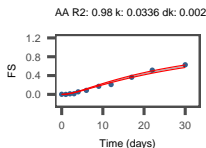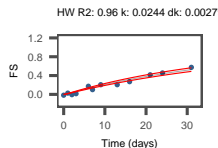

CH60 – VGEVIVTK\_2

CLH1 – KDPELWGSVLESNPYR\_3

CMC1 – IVQLLAGVADQTK\_2

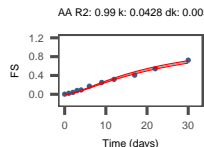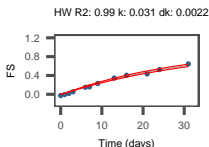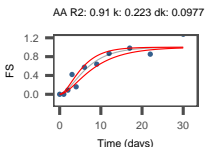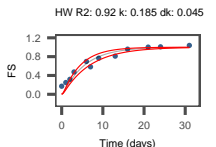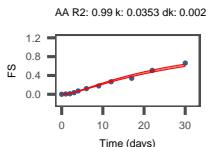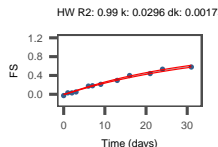

CMC1 - SPSVAVAQPK\_2

COF1(Non-Unique) - YALDYATYETK\_2

COQ9 - STGEALVQGLMGAAVTLK\_2

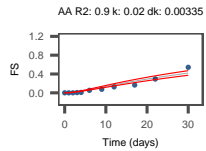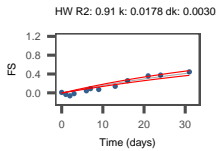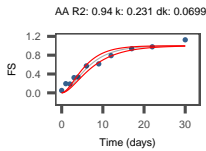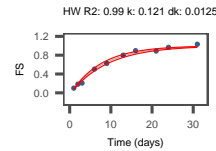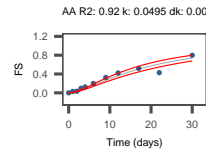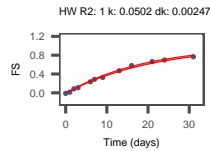

CMC1 - VGGINLLTAGALAGVPAASLVPADVIK\_2

COF2 - LGGSVVSLGKPL\_2

COQ9 - STGEALVQGLMGAAVTLK\_3

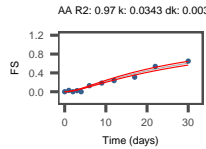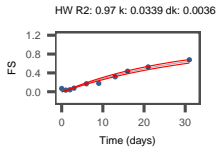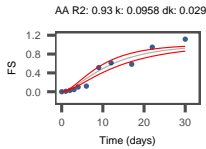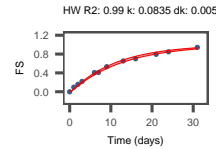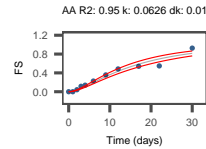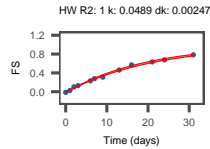

CMC1 - VGGINLLTAGALAGVPAASLVPADVIK\_3

COF2 - QILVGDIGDVEDPYTSFVK\_2

COX1 - ASTNLEWLHGCPPPYHTFEPTYVK\_4

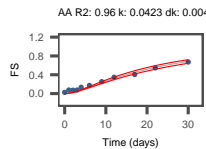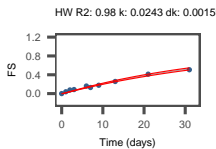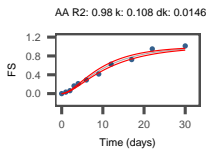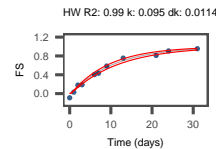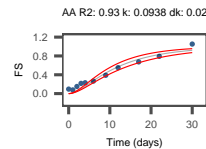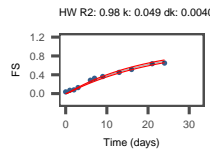

CMC2 - DLGFFGIYK\_2

COQ8A - ALQSTAVEQFSMVFGK\_2

COX1 - AYFTSATMIIAIPTVGK\_2

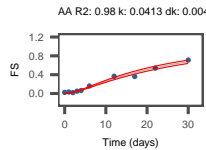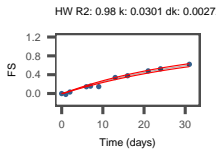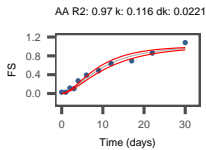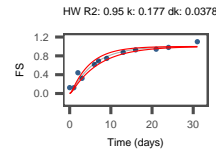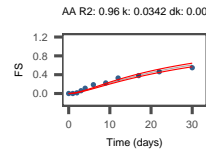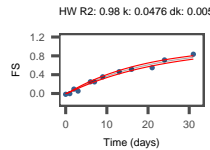

CMC2 - FGLGSIAGAVGATAVPIDLVK\_2

COQ9 - LNQLVEEQK\_2

COX1 - VFSWLATLHGNIK\_3

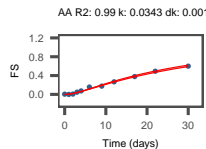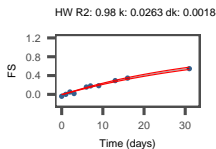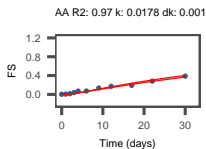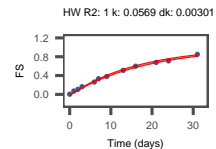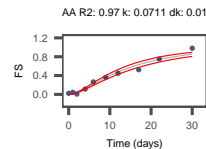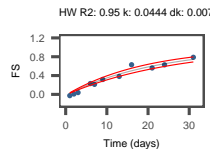

COF1 - LGGSAVISLEGKPL\_2

COQ9 - LVQLGAEK\_2

COX17 - GEECHGLIEAHK\_4

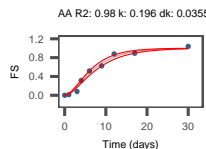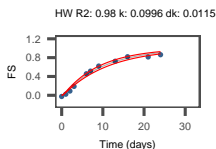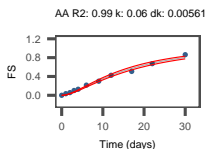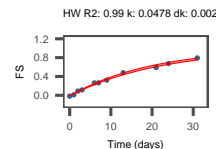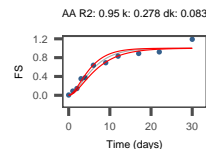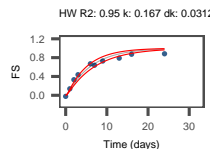

COX2 – MIPTNDLKPGE\_L2

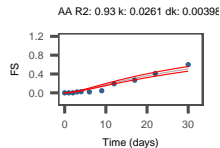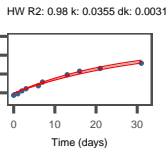

COX41 – DYPLPDVAHVMTLSASQK\_3

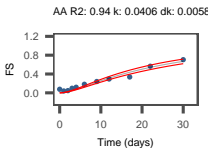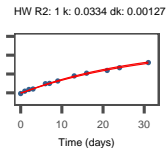

COX5B – EDPNLPVPSISNK\_2

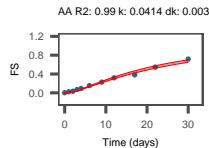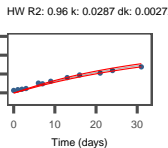

COX2 – SFMPIVLEMVPLK\_2

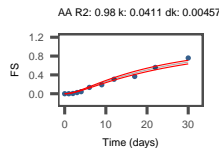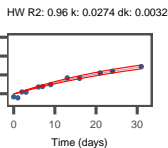

COX5A – GM[15.9949]NTLVGYDLVPEPK\_2

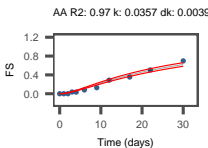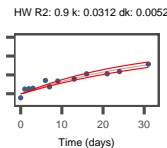

COX5B – EIMIAAQK\_2

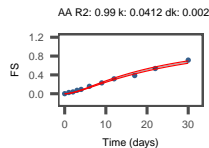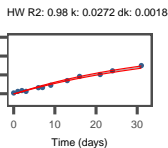

COX3 – EGTYQGHTPIVQK\_2

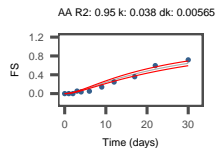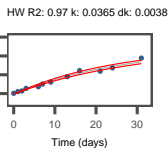

COX5A – GMNTLVGYDLVPEPK\_3

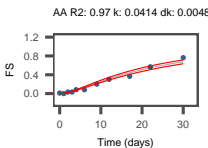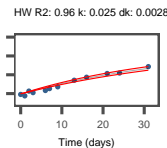

COX6C – NYDSMKDFEEMR\_2

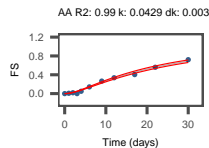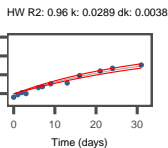

COX3 – EGTYQGHTPIVQK\_3

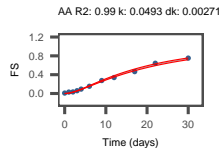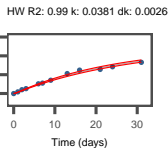

COX5A – NKPIDAWELR\_3

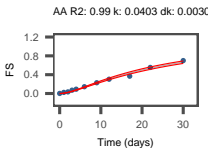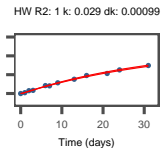

COX6C – NYDSMKDFEEMR\_3

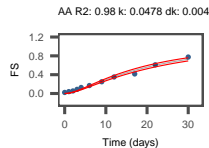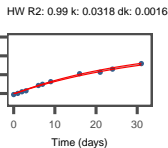

COX41 – DWVAMQTK\_2

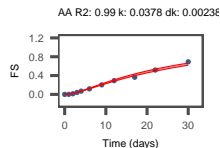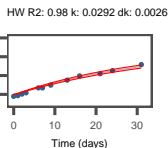

COX5A – VIQELRPTLNELGISTPEELGLDKV\_3

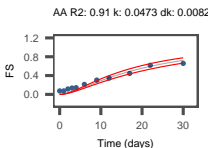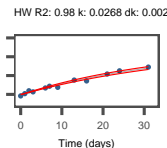

CPT1B – ALADDDVYCFQLFPFGK\_2

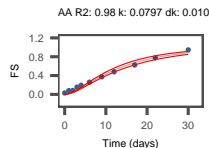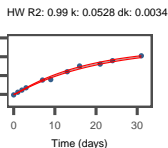

COX41 – DYPLPDVAHVMTLSASQK\_2

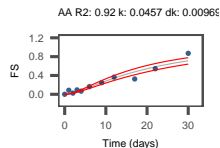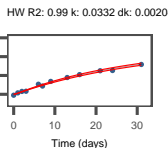

COX5A – VIQELRPTLNELGISTPEELGLDKV\_4

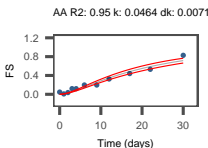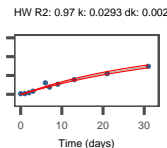

CPT1B – HIYLSGINSWK\_3

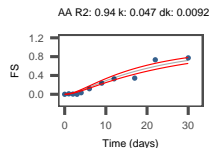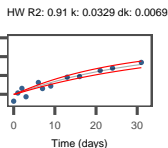

CPT1B – ILDDSPPPQGEK\_2

CRYAB – VLGDVIEVHGK\_3

CTNB1(Non-Unique) – EGLLAIKF\_2

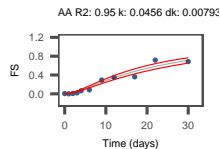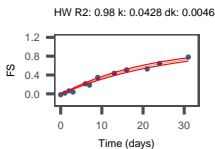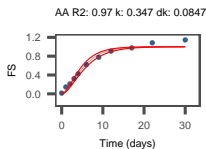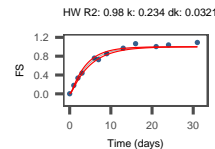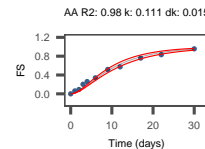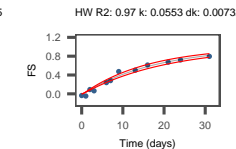

CPT1B – KQDLQLFR\_3

CSRP1 – HEEAPGHRPTTNPASK\_4

CX7A2 – LfqEDNGMPVHLK\_2

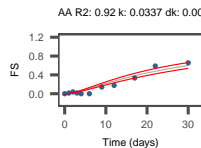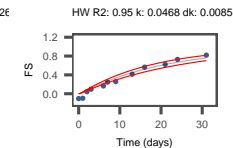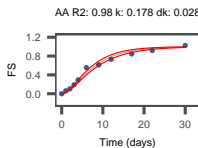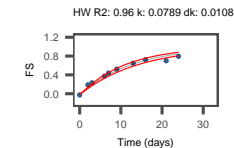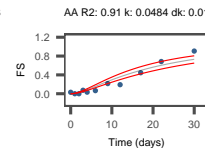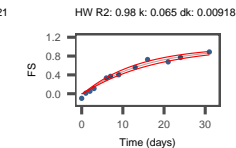

CPT1B – QALLDIAELFK\_2

CSRP3 – ALDSTTVAHESEIYK\_2

CY1 – HLVGVCYTEEAK\_2

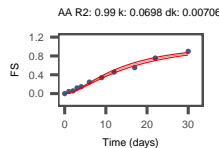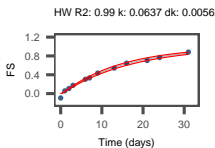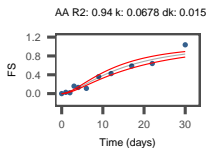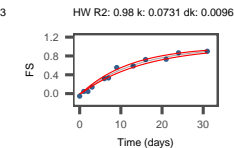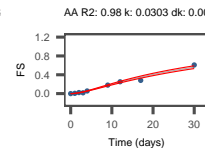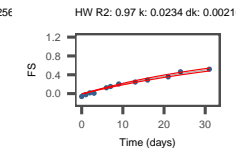

CPT1B – SPLMVNSYYAMDFVLK\_3

CSRP3 – ALDSTTVAHESEIYK\_3

CY1 – HLVGVCYTEEAK\_3

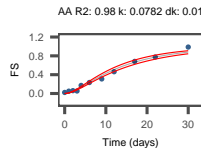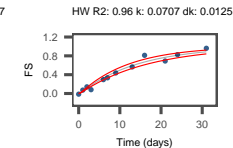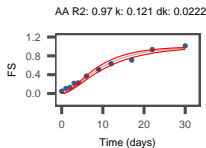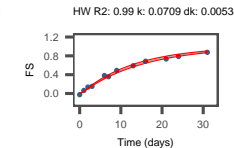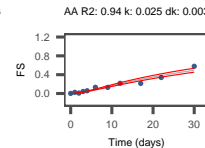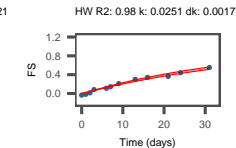

CPT2 – CLEDMFADALEGK\_2

CTNA1 – LLLIADMADVYK\_2

CY1 – LSDYFPK\_2

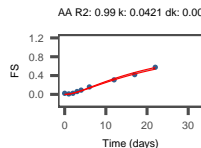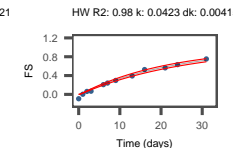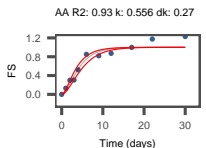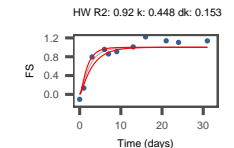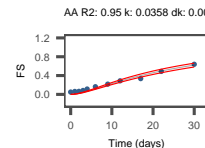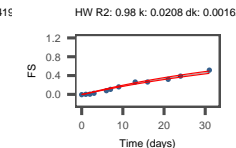

CPT2 – DELFTDTK\_2

CTNA1 – NAGNEQLGIQYK\_2

DDX3L(Non-Unique) – SFLDLLNATGK\_2

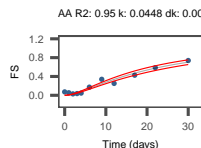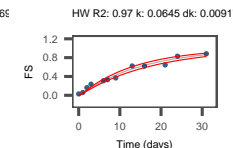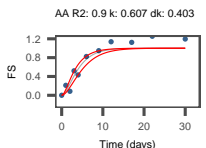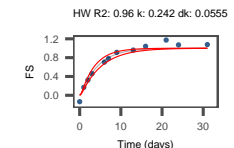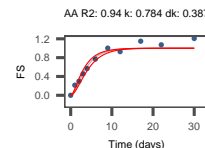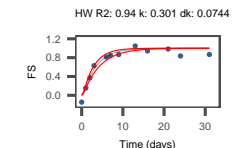

**DECR – CDVRPDMVHNTVLELIK\_4**

**DESM – RIESLNEEIAFLK\_3**

**DESP – NLLLAEQGSHHTVTK\_3**

AA R2: 0.96 k: 0.0346 dk: 0.00395

HW R2: 0.94 k: 0.022 dk: 0.00316

AA R2: 0.98 k: 0.138 dk: 0.0221

HW R2: 0.98 k: 0.0835 dk: 0.0091

AA R2: 0.94 k: 0.239 dk: 0.0887

HW R2: 0.99 k: 0.167 dk: 0.0195

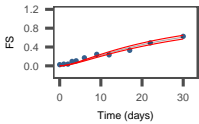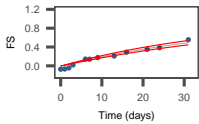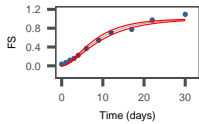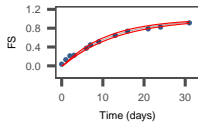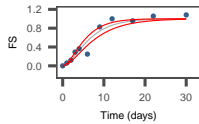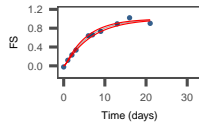

**DECR – VAFITGGGTGLGK\_2**

**DESP – ALLQAILQTEDMLK\_2**

**DESP – NMPLQLHLEQIK\_3**

AA R2: 0.99 k: 0.0339 dk: 0.00205

HW R2: 0.98 k: 0.0227 dk: 0.0014

AA R2: 0.98 k: 0.266 dk: 0.055

HW R2: 0.99 k: 0.18 dk: 0.0147

AA R2: 0.98 k: 0.149 dk: 0.0261

HW R2: 0.98 k: 0.187 dk: 0.0334

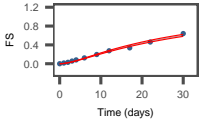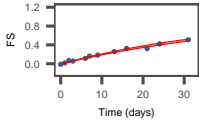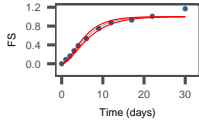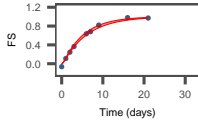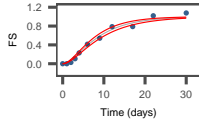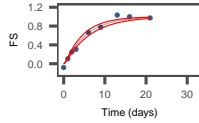

**DECR – VTKEEWDIEGLIR\_3**

**DESP – GFFDPNTEENLTYLQLK\_2**

**DESP – SVQNSQALAEVLNQLK\_3**

AA R2: 0.99 k: 0.036 dk: 0.00247

HW R2: 0.96 k: 0.0311 dk: 0.0031

AA R2: 0.97 k: 0.361 dk: 0.0964

HW R2: 0.98 k: 0.173 dk: 0.0281

AA R2: 0.98 k: 0.162 dk: 0.03

HW R2: 0.93 k: 0.235 dk: 0.0643

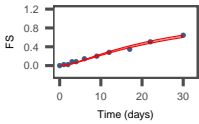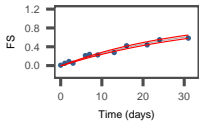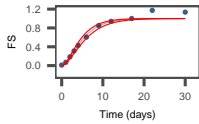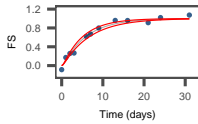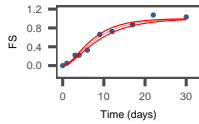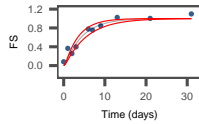

**DESM – AQYETIAAK\_2**

**DESP – ITNLTQLEQASIVK\_2**

**DEST – EILVGDVGATITDPFK\_2**

AA R2: 0.99 k: 0.11 dk: 0.011

HW R2: 0.95 k: 0.0899 dk: 0.0156

AA R2: 0.96 k: 0.221 dk: 0.0712

HW R2: 0.98 k: 0.172 dk: 0.0242

AA R2: 0.92 k: 0.192 dk: 0.083

HW R2: 0.93 k: 0.126 dk: 0.0408

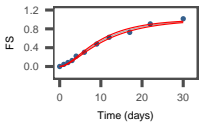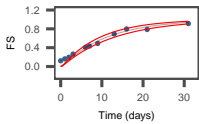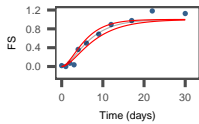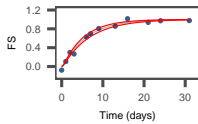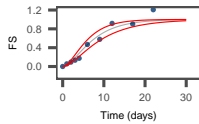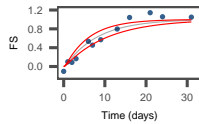

**DESM – HQIQSYTCEIDALK\_2**

**DESP – LLEAQACTGGIHPHTGQK\_3**

**DHPR – GAVHQLCQSLAGK\_2**

AA R2: 0.98 k: 0.124 dk: 0.0206

HW R2: 0.99 k: 0.0801 dk: 0.0082

AA R2: 0.94 k: 0.196 dk: 0.0644

HW R2: 0.94 k: 0.116 dk: 0.0259

AA R2: 0.95 k: 0.0505 dk: 0.0086

HW R2: 0.9 k: 0.0727 dk: 0.0155

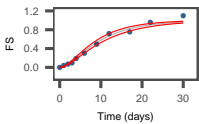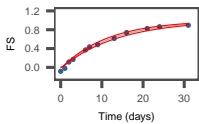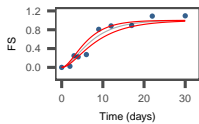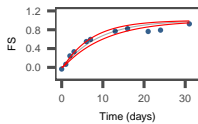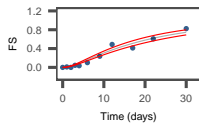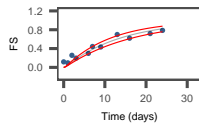

**DESM – NISEAEWEYK\_2**

**DESP – LLEAQLASGGVDPVNSVFLPK\_2**

**DLDH – ADQPIEADTVIGSGPGGYVAIK\_2**

AA R2: 0.98 k: 0.132 dk: 0.0204

HW R2: 1 k: 0.0805 dk: 0.00426

AA R2: 0.94 k: 0.169 dk: 0.056

HW R2: 0.99 k: 0.157 dk: 0.0162

AA R2: 0.96 k: 0.0302 dk: 0.00333

HW R2: 0.98 k: 0.0268 dk: 0.0017

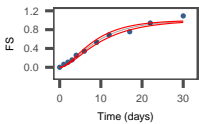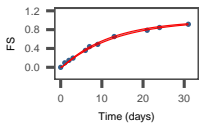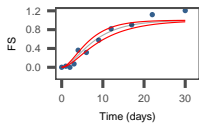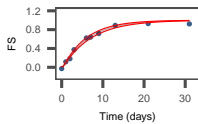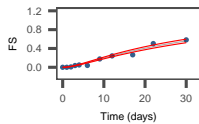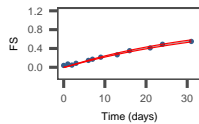

LDLH - ALTGIAHLFK\_3

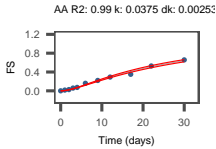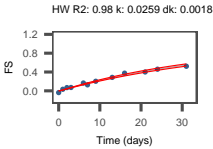

DNJA2 - IGLVEALCGFQFTFK\_2

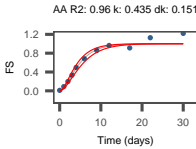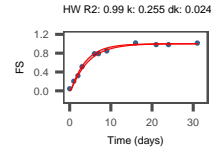

ECH1 - HVLHVQLNRPEK\_3

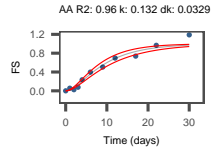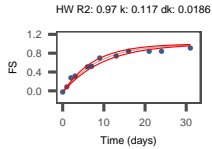

LDLH - EANLAAAFGK\_2

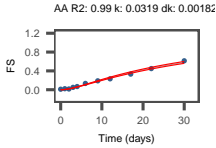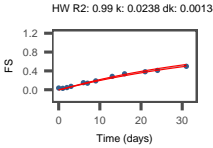

DNM1L - PALFVPEVSPELLVK\_2

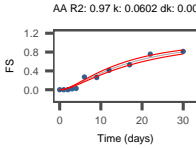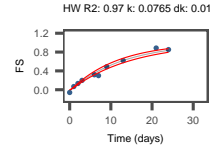

ECH1 - HVLHVQLNRPEK\_4

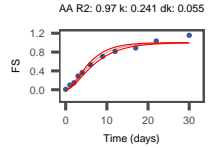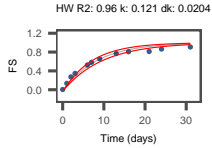

LDLH - IPNIYAIGDVVAGPMLAHK\_3

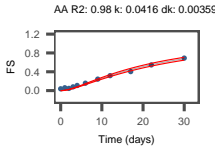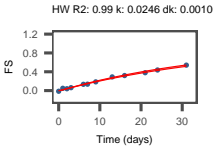

DYHC1 - FYFVGDEDLLEIGNSK\_2

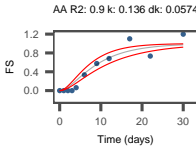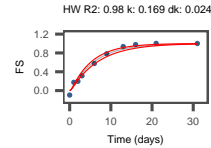

ECH1 - YCTQDAFFQIK\_2

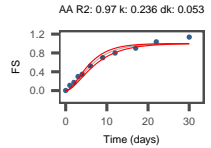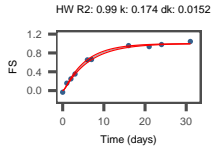

DMD - LLDLLEGLTGQK\_2

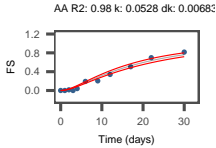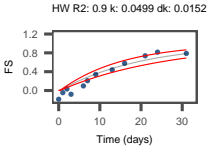

DYHC1 - LALESICLLLGESTTDWK\_3

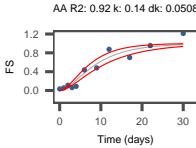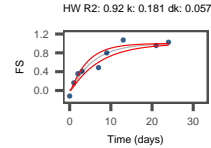

ECHA - ADMVIEAVFEDLGVK\_2

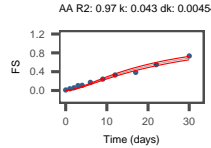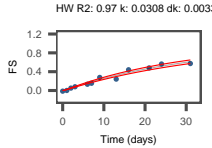

DMD - VEEWLNLLEQYK\_2

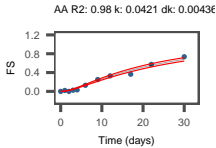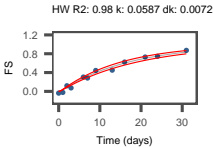

DYL2(Non-Unique) - DLAAIYK\_2

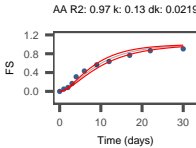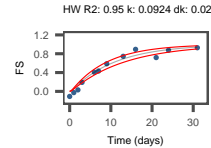

ECHA - AGLEQSGDAGYLAESQK\_2

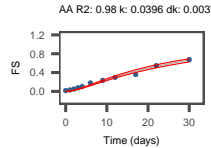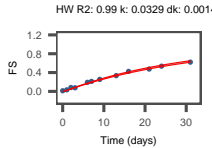

DMD - WIVLQDILLK\_2

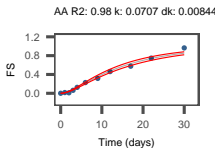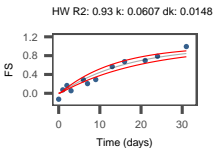

ECH1 - DAMLNAAFALADISSK\_3

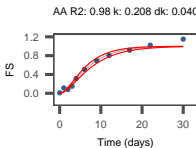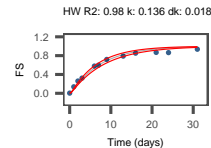

ECHA - DSIFSNLIGQLDYK\_3

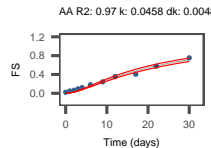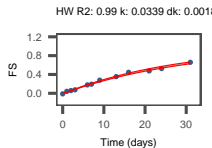

ECHA – FGELALTK\_2

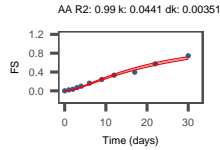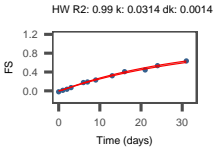

ECHA – MGLVDQLVEPLGPGIK\_3

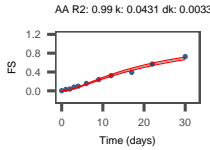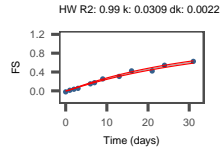

ECHB – ALAMGYK\_2

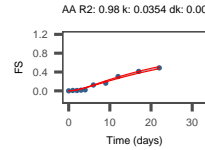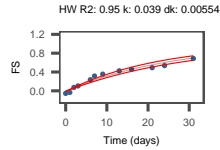

ECHA – FVDLYGAQK\_2

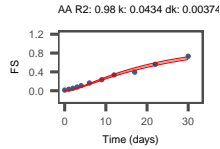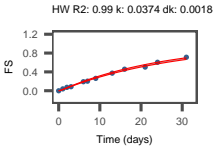

ECHA – MQLLEITDK\_2

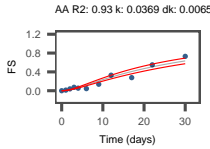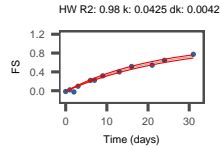

ECHB – DQLLLGPTYATPK\_2

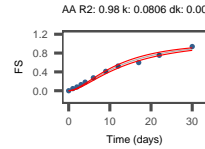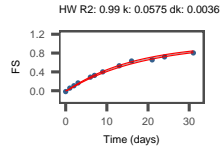

ECHA – GLYPAPLK\_2

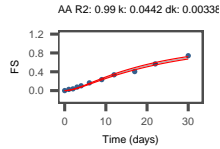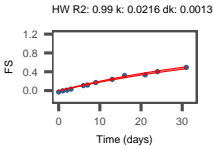

ECHA – NVQQLAILGAGLMGAGIAQVSDVK\_2

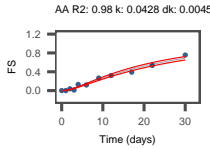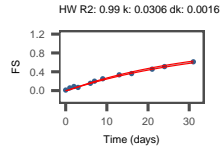

ECHB – IPFLLSGTSYK\_2

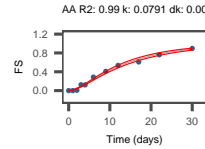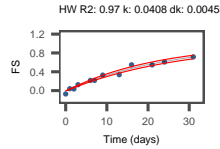

ECHA – KYESAYGTQFTPC\_2

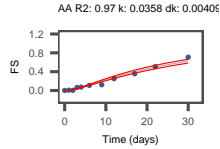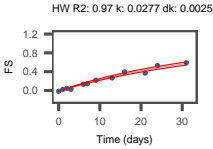

ECHA – THINYGVK\_2

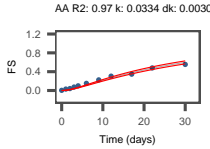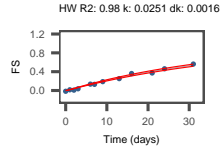

ECHB – VGSPPLEK\_2

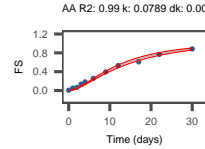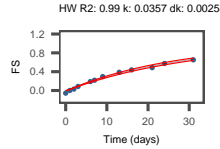

ECHA – KYESAYGTQFTPCQL\_2

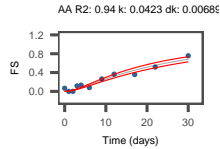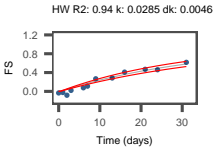

ECHA – VIGMHYFSPVDK\_2

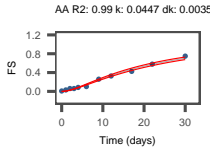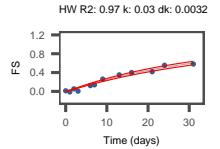

ECHM – LVEEIAQCAEK\_2

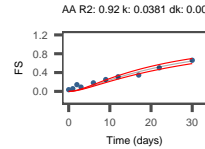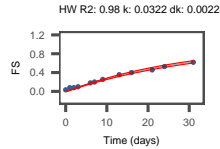

ECHA – LPAKPEVSSDEDVQYR\_2

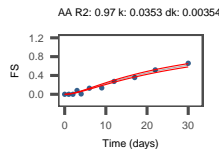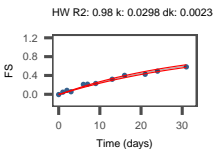

ECHA – VIGMHYFSPVDK\_3

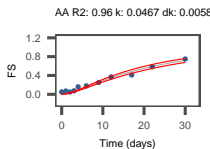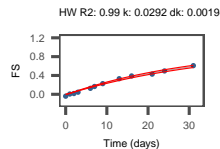

ECHM – NSSVGLQLNRPK\_3

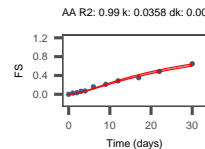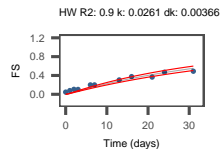

EC11 - ALQLGLTSPAEALK\_2

EF1G - EYFSWEGTFQHVKG\_3

EF2 - IVGLVGVQDFLVK\_2

AA R2: 0.98 k: 0.0341 dk: 0.00255

HW R2: 0.94 k: 0.0255 dk: 0.0030

AA R2: 0.97 k: 0.12 dk: 0.0215

HW R2: 0.96 k: 0.0847 dk: 0.0175

AA R2: 0.99 k: 0.229 dk: 0.036

HW R2: 0.97 k: 0.168 dk: 0.0307

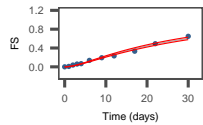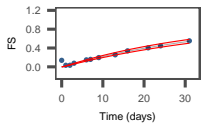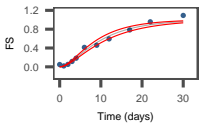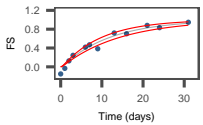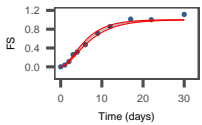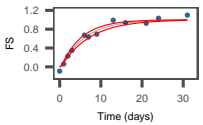

EC11 - VLVETEGPAGVAVMK\_2

EF1G - ILGLDTHLK\_3

EFTU(Non-Unique) - EHLLAK\_2

AA R2: 0.99 k: 0.0368 dk: 0.0017

HW R2: 0.99 k: 0.0266 dk: 0.0013

AA R2: 0.99 k: 0.129 dk: 0.0144

HW R2: 0.92 k: 0.0862 dk: 0.0262

AA R2: 0.99 k: 0.0385 dk: 0.00296

HW R2: 0.96 k: 0.0263 dk: 0.0032

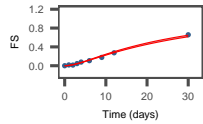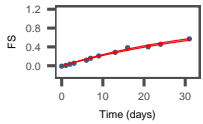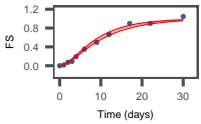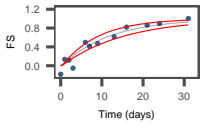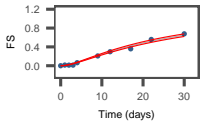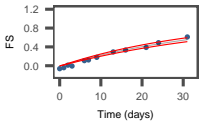

EF1A1 - MDSTEPYSQK\_2

EF2 - DSVVAGFQWATK\_2

EFTU - ELAMPGEDLK\_2

AA R2: 0.99 k: 0.208 dk: 0.0328

HW R2: 0.95 k: 0.0795 dk: 0.0179

AA R2: 0.92 k: 0.381 dk: 0.167

HW R2: 0.97 k: 0.18 dk: 0.0261

AA R2: 0.9 k: 0.0595 dk: 0.0136

HW R2: 0.94 k: 0.0371 dk: 0.0051

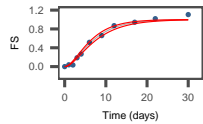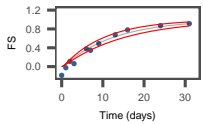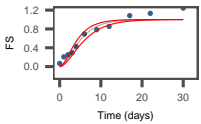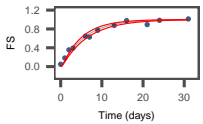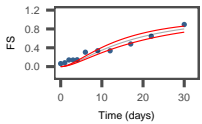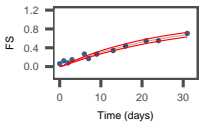

EF1A2 - MDSTEPAYSEK\_2

EF2 - EDLYLPIQR\_3

EFTU - GDECELLGHNK\_3

AA R2: 0.98 k: 0.116 dk: 0.0152

HW R2: 1 k: 0.073 dk: 0.00455

AA R2: 1 k: 0.21 dk: 0.0112

HW R2: 0.99 k: 0.126 dk: 0.0111

AA R2: 0.91 k: 0.0387 dk: 0.00733

HW R2: 0.93 k: 0.0277 dk: 0.0047

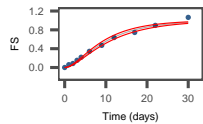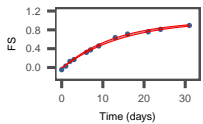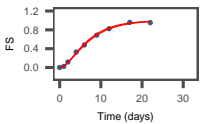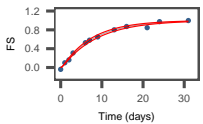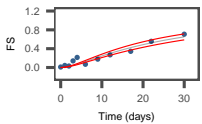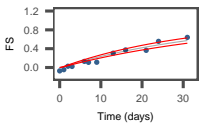

EF1A2 - RYDEIVK\_2

EF2 - EGIPALDNFLDKL\_2

EFTU - GLVMVKPGSIQH\_3

AA R2: 0.99 k: 0.0985 dk: 0.00766

HW R2: 0.92 k: 0.105 dk: 0.0243

AA R2: 0.94 k: 0.286 dk: 0.104

HW R2: 0.99 k: 0.129 dk: 0.0113

AA R2: 0.99 k: 0.0443 dk: 0.00253

HW R2: 0.96 k: 0.0263 dk: 0.0030

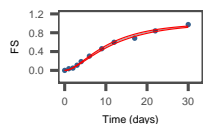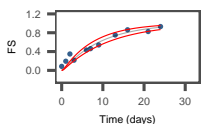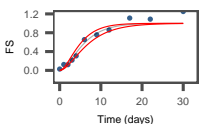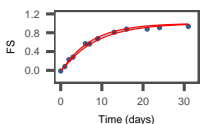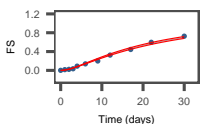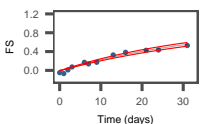

EF1A2 - VETGILRPGMVVTFAPVNNITVEVK\_3

EF2 - GHVFEEQSQVATPMFVVK\_3

EFTU - HYAHTDCPGHADVVK\_3

AA R2: 0.95 k: 0.156 dk: 0.0382

HW R2: 0.99 k: 0.0774 dk: 0.0054

AA R2: 0.93 k: 0.226 dk: 0.0795

HW R2: 0.98 k: 0.12 dk: 0.017

AA R2: 0.91 k: 0.0274 dk: 0.00466

HW R2: 0.96 k: 0.0333 dk: 0.0037

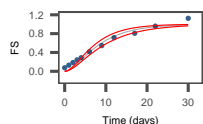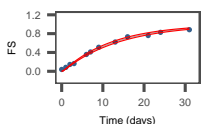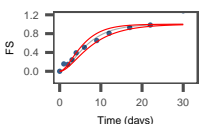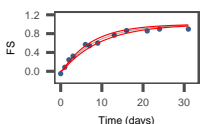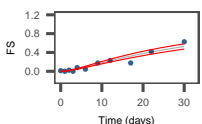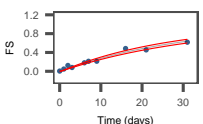



**EFTU – HYAHTDCPGHADYVK\_4**

**EHD2(Non-Unique) – ILLFDAHK\_3**

**ENOA – TIAPALVSK\_2**

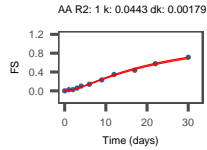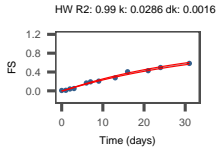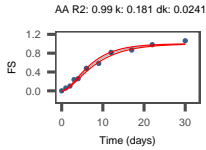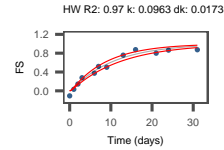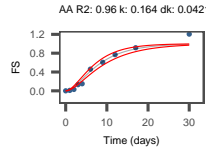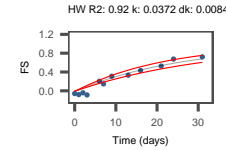

**EFTU – QIGVEHVVVYVVK\_3**

**EHD2 – VDLILLFDAHK\_3**

**ENOA – YITPDQLADLYK\_2**

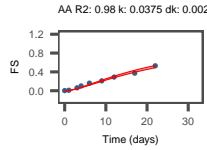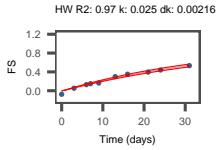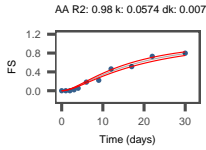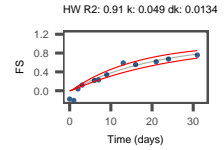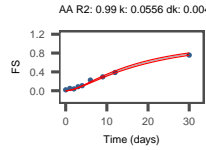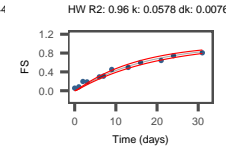

**EFTU – TIGTGLVTDVPAMTEEDK\_2**

**EHD4 – LIEAVDNMLTNK\_2**

**ENOB – FMIELDGTENK\_2**

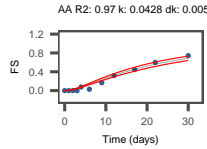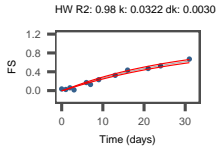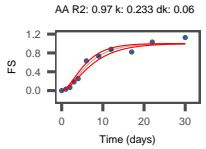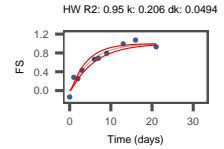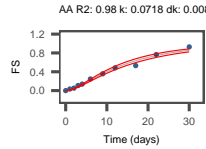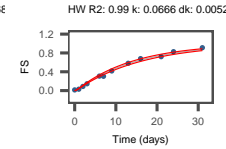

**EFTU – TTLTAATK\_2**

**ENOA(Non-Unique) – AILGVSLAVCK\_2**

**ENOB – IEEALGDK\_2**

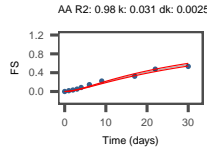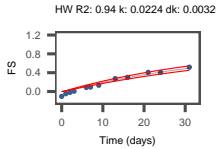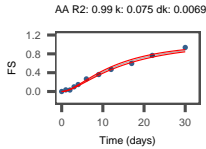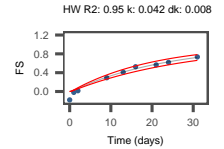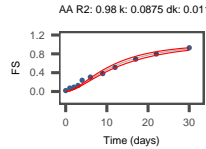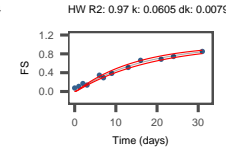

**EFTU – TVVTGIEMFHK\_3**

**ENOA(Non-Unique) – SGETEDTFIADLVVGLCTGQIK\_2**

**ENOB – IGAEVYHHLK\_3**

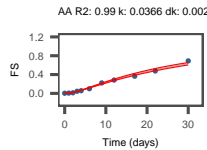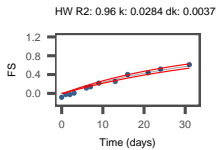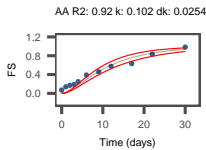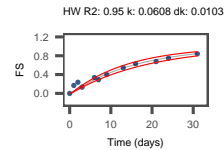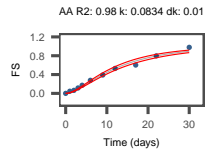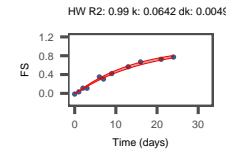

**EHD2 – DGMLDDEEFALASHLIEAK\_3**

**ENOA(Non-Unique) – SGETEDTFIADLVVGLCTGQIK\_3**

**ENOB – LAMQEFMILPVGASSFK\_2**

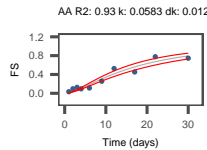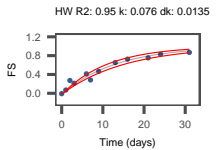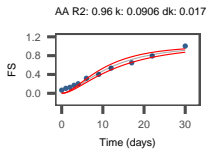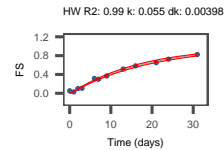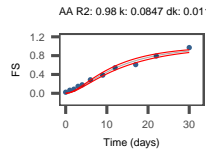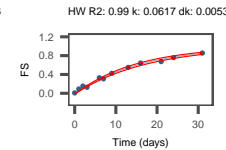

**ENOB - LSGVDIQVGDLLTVNPK\_2**

**ETFA - DPEAPIFQVADYGVIVDLFK\_3**

**ETFA - SDRPELTGAK\_2**

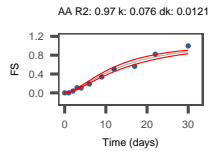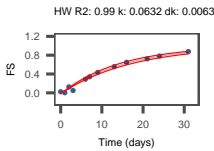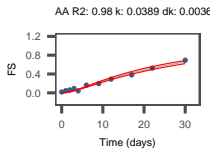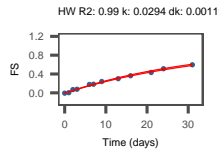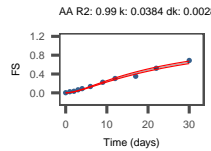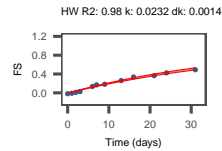

**ENOB - TAIQAAGYDPK\_2**

**ETFA - GLLPEELTPLILETQK\_3**

**ETFA - SDRPELTGAK\_3**

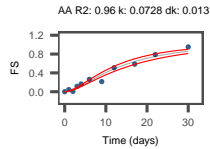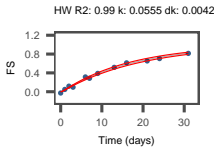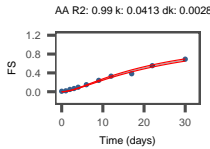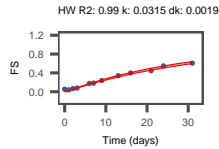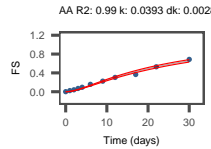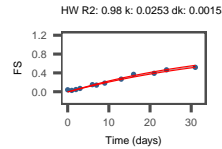

**ENOB - TLGPALLEK\_2**

**ETFA - GTSFEAAATSGGSASSEK\_2**

**ETFA - TIVAINK\_2**

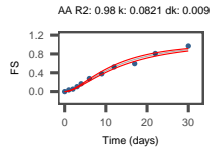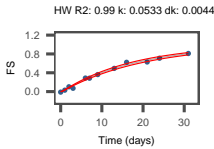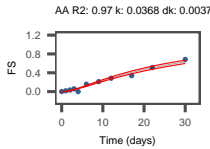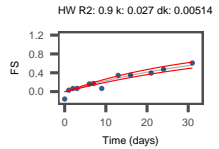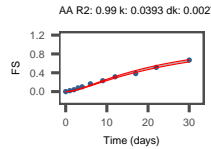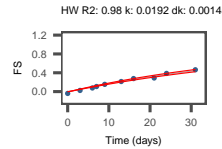

**ENPL - EFEPELLNWMK\_2**

**ETFA - GTSFEAAATSGGSASSEK\_3**

**ETFA - VLVQHDAYK\_2**

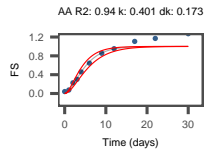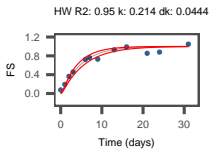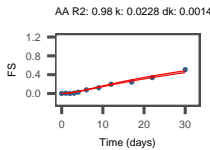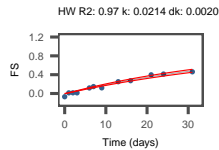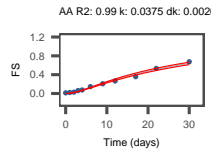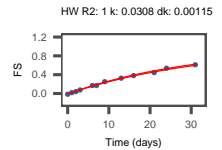

**EST1D - AVIGDHGDEIFSVFGSPFLK\_3**

**ETFA - IAVGISAIQHLAGMK\_3**

**ETFA - VLVQHDAYK\_3**

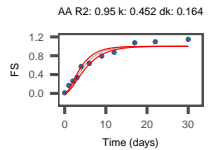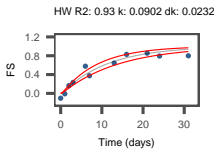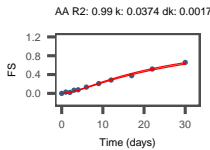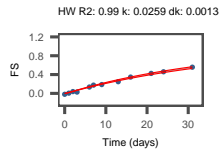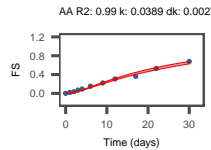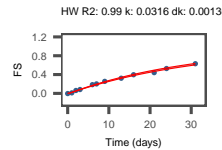

**EST1D - ESYPFLPTVDGVVLPK\_2**

**ETFA - LNVAPVSDIIEK\_2**

**ETFA - VVPEMTEILK\_2**

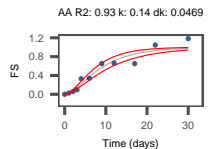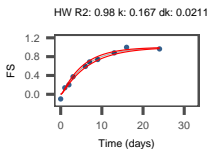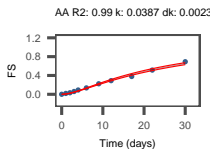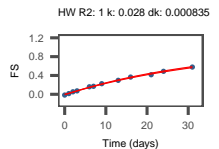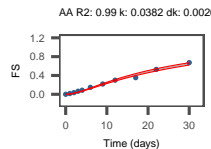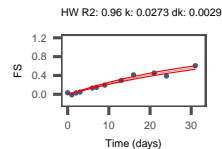

ETFB - AGDLGVDLTSK\_2

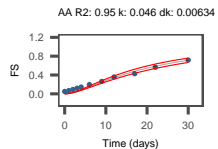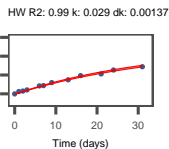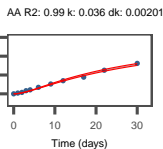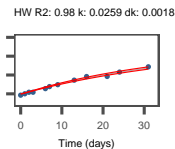

FABP4 - LVSSNFDDYMK\_2

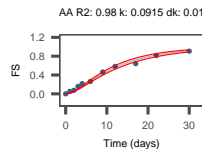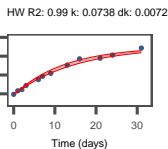

ETFB - LKLPAVVTADLR\_3

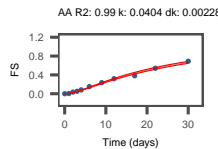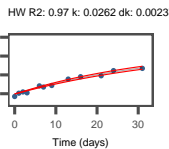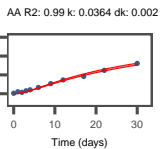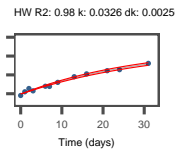

FABP9(Non-Unique) - NTEISFK\_2

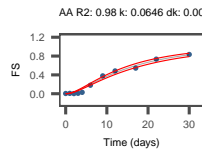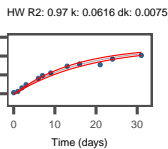

ETFB - VETTEDLVAK\_2

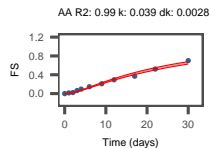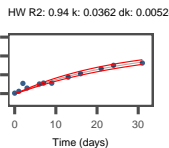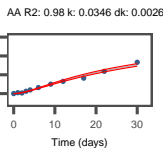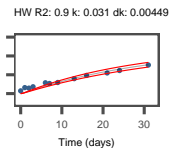

FHL1 - FTAVEDQYYCVCYK\_2

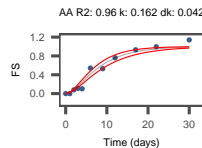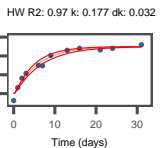

ETFB - VIDFAVK\_2

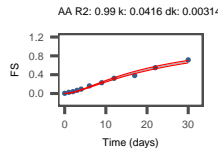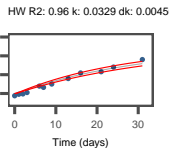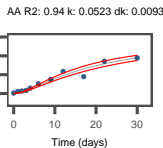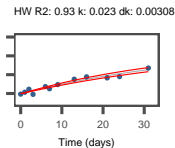

FHL1 - FVFHNEQYVPCDAK\_3

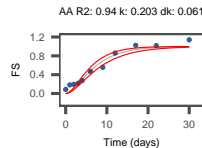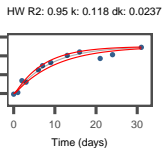

ETFD - AAQIGAHTLSGACLDPAAFK\_3

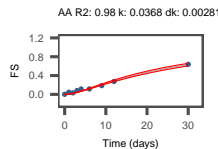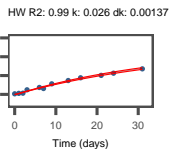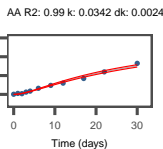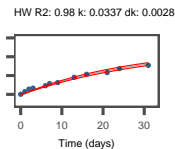

FHL2 - DDILCPDCGK\_2

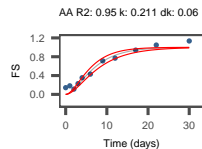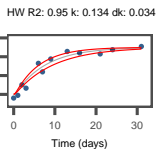

ETFD - ALNEGGLQSIK\_2

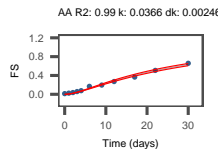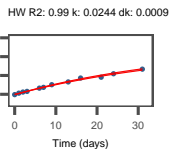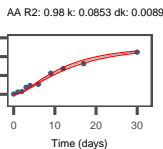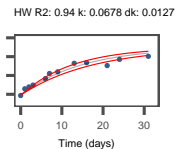

FABP4 - LGVFDEITADDRK\_3

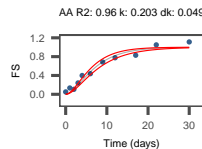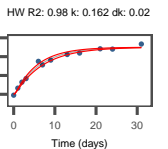

FHL2 - DEFYCLTFCFDLYAK\_2



FUMH – VEFDTFGELK\_2

G3P – VIISAPSADAMPFVMGVNHEK\_2

G6PI – HFVALSTNTAK\_2

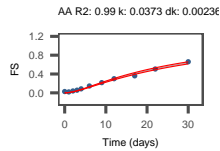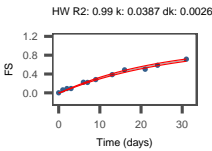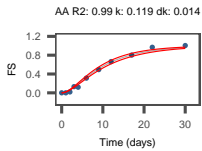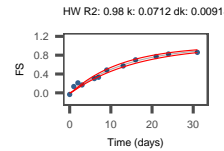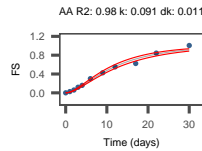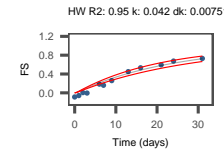

FUMH – VLLPGLQK\_2

G3P – VIISAPSADAMPFVMGVNHEK\_3

G6PI – ILGALIAMYEHK\_3

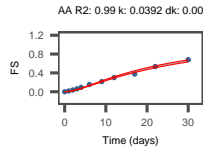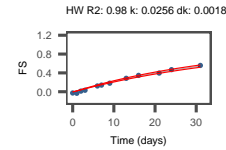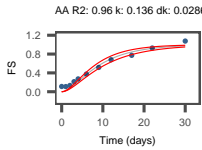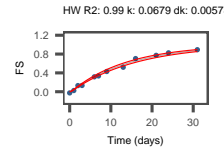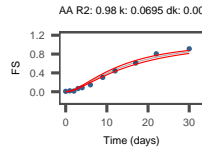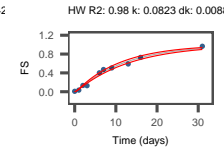

G3P(Non-Unique) – CLAPLAK\_2

G3P – VIPELNGK\_2

G6PI – ILLANFLAQTEALMK\_2

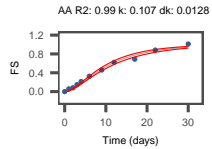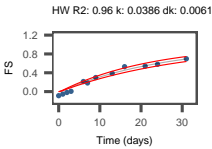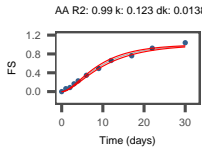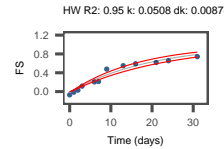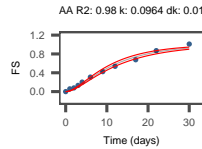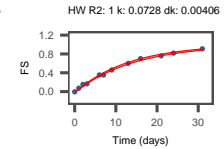

G3P – MFQYDSTHGK\_2

G3P – VVDLMAYMASK\_2

G6PI – ILLANFLAQTEALMK\_3

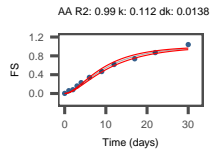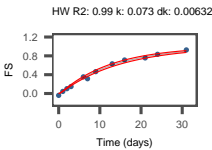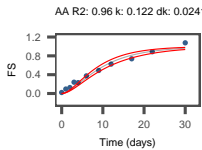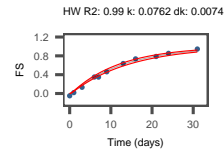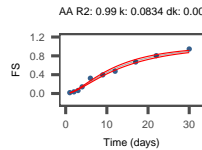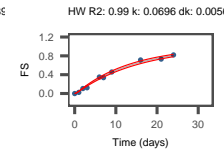

G3P – MFQYDSTHGK\_3

G6PI – EWFLEAAK\_2

G6PI – SITDINIGIGSDGLPLMVTEALPKY\_3

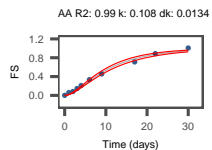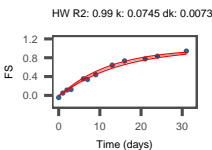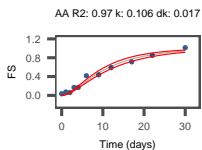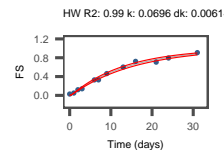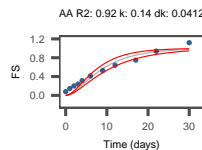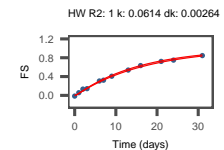

G3P – VIHDNFGIVEGLMTTVHAITATQK\_3

G6PI – FAAYFQQGDMESNGK\_2

G6PI – TFFTQETITNAETAK\_2

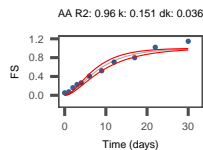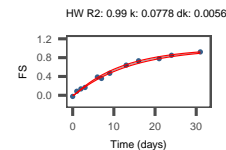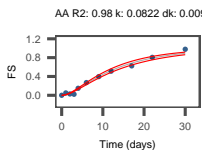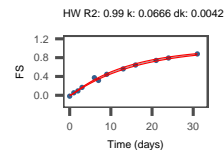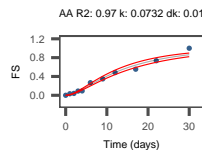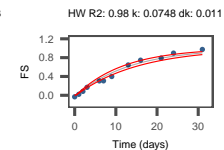



GRP75 – VINEPTAALAYGLDK\_2

GSTO1(Non-Unique) – HEVINNLK\_2

H2A1B(Non-Unique) – VTIAQGGVLPNIQAVLLPK\_3

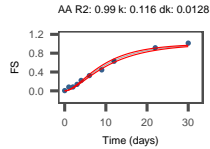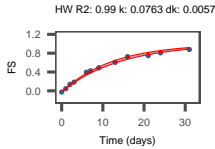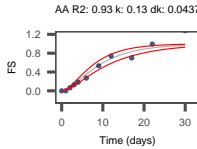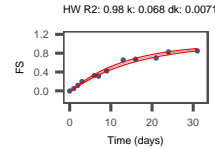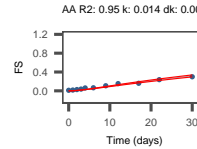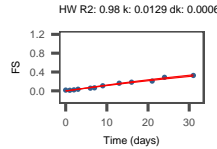

GSTA4 – KPPDPGYVEVVR\_3

GSTO1 – LWMAAMQDPVASSHK\_3

H2B1F(Non-Unique) – ESYSVYVK\_2

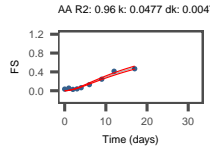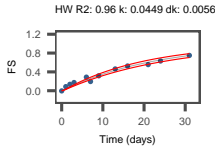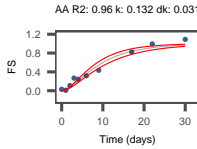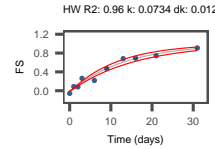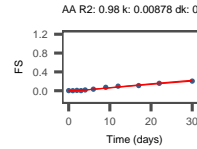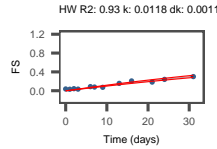

GSTK1 – LELLAYLLGEK\_2

GSTP1(Non-Unique) – EEVVTIDTWMQGLLK\_2

H2B1F(Non-Unique) – QVHPDTGISSK\_3

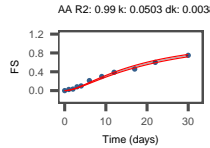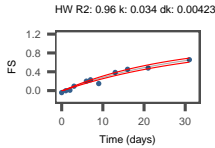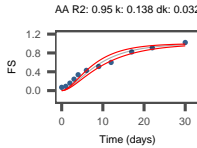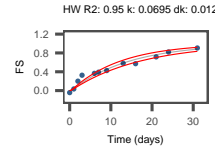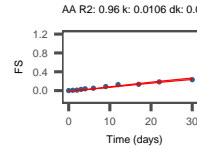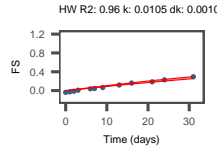

GSTM1(Non-Unique) – LGLDFPNLPYLIDGSHK\_3

GSTP1\_HUMAN,sp|P19157|GSTP1(Non-Unique) – MLLADQGSWK\_2

HBA – AAGHLDDLPGALSALSDLHAHK\_4

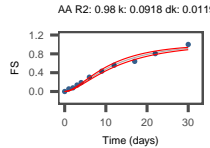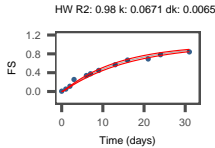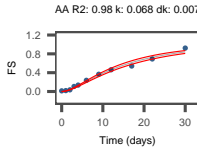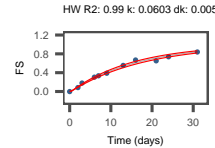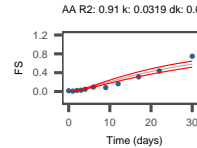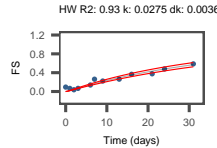

GSTM1 – MLLEYDSSYDEK\_2

H12(Non-Unique) – ALAAAGYDVEK\_2

HBA – AAGHLDDLPGALSALSDLHAHK\_5

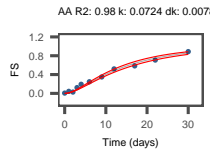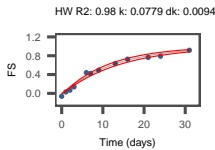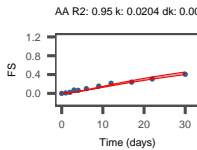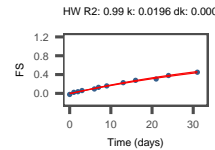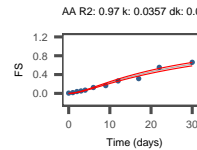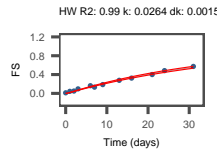

GSTM1 – MQLMLCYNPDFEK\_2

H12(Non-Unique) – ASGPPVSELITK\_2

HBA – CLLVTLASHHPADFTPAVHASLDK\_5

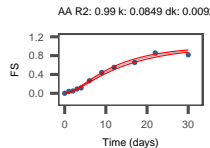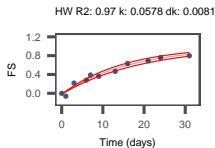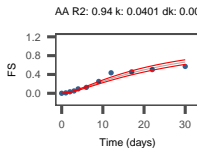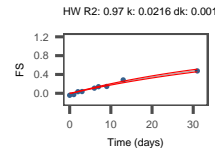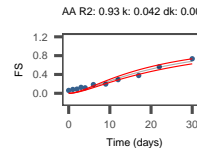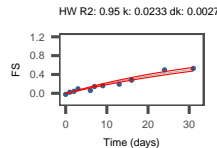

HBA - LLVTLASHHPADPTPAVHASLDK\_4

HCD2 - VVTIAPGLFATPLLLTLPEK\_2

HHATL - LPDSALAGLAYSNLVYDVK\_2

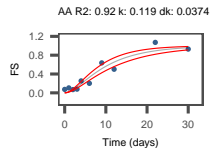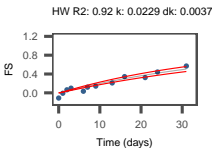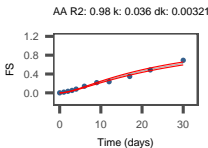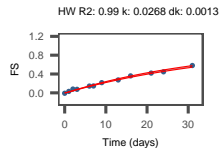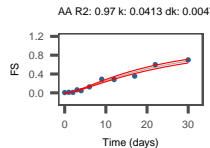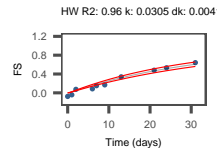

HBA(Non-Unique) - LRVDVPNFK\_3

HCD2 - VVTIAPGLFATPLLLTLPEK\_3

HHATL - YSLADLLK\_2

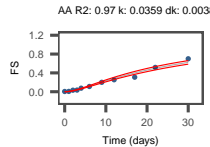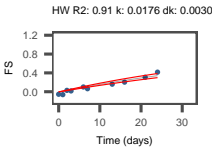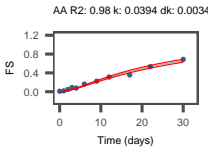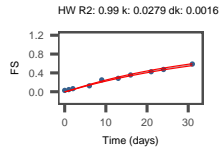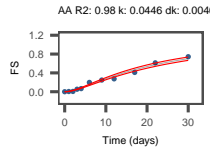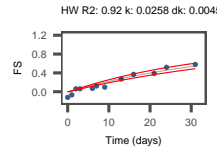

HBA(Non-Unique) - VDPVNFK\_2

HCDH - LGAGYPMGPFELLDYGLDTTK\_3

HIBCH - DVTDEDLNSYFK\_2

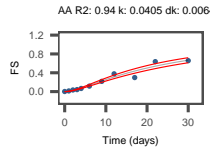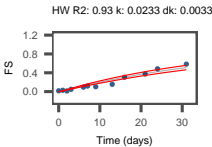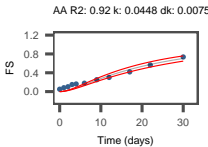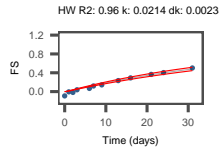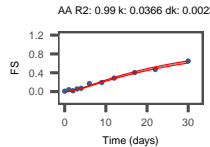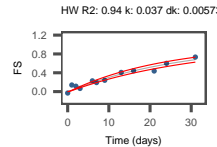

HBB1(Non-Unique) - GTFASLSELHCCK\_2

HCDH - LKNELFQR\_2

HIBCH - SPSAEDVAGVLESYHAK\_3

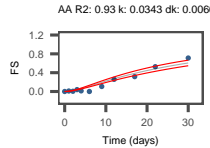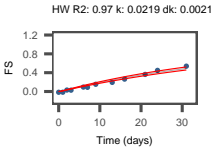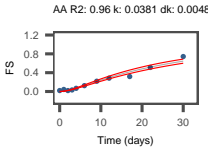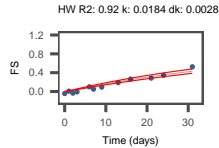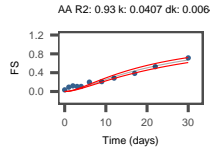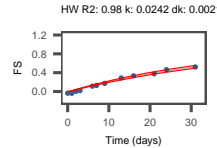

HBB1(Non-Unique) - VHLTDAEK\_2

HDHD2 - LLLDGAPLIAHK\_3

HINT1 - AQAQPGGDTIFGK\_2

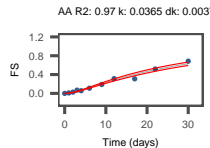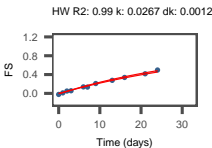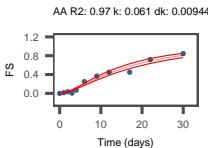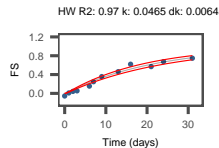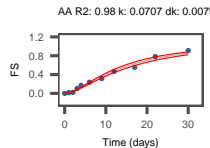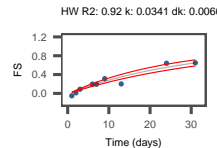

HCD2 - LGESCIFAPANVTSK\_2

HEM2 - AGADIITYFAPLLK\_2

HINT1 - CLAFHDISPQAPTHLVIPK\_4

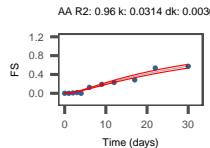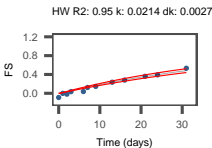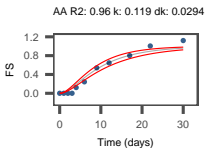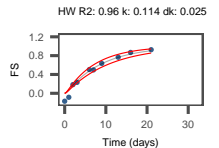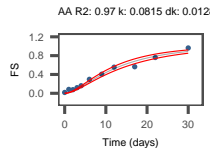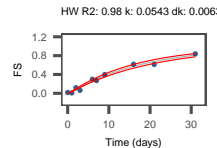



**HINT2 – ISQAEEDDQLLGHLLLVAK\_3**

**HS90A(Non-Unique) – YIDQEELNK\_2**

**HSP72(Non-Unique) – LLQDFNKG\_2**

AA R2: 0.98 k: 0.0522 dk: 0.00506

HW R2: 0.98 k: 0.0417 dk: 0.0040

AA R2: 0.91 k: 0.508 dk: 0.251

HW R2: 0.95 k: 0.276 dk: 0.0644

AA R2: 0.98 k: 0.169 dk: 0.0235

HW R2: 0.96 k: 0.104 dk: 0.0189

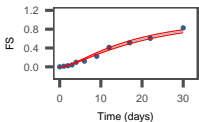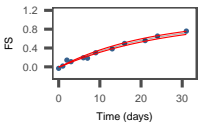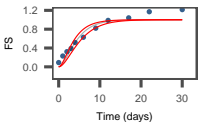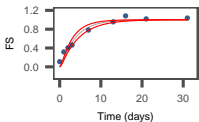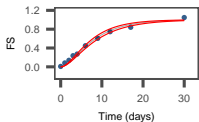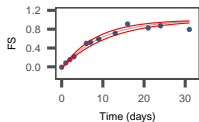

**HNRPK – GSYDGLGPIITQVTIPK\_2**

**HS90B – DNSTMGYMMAK\_2**

**HSP74 – SNLAYDIVQLPTGLTGIIK\_2**

AA R2: 0.96 k: 0.353 dk: 0.098

HW R2: 0.93 k: 0.166 dk: 0.0408

AA R2: 0.98 k: 0.257 dk: 0.046

HW R2: 0.95 k: 0.101 dk: 0.0245

AA R2: 0.94 k: 0.196 dk: 0.0702

HW R2: 0.91 k: 0.117 dk: 0.0351

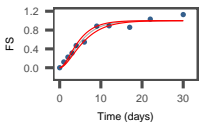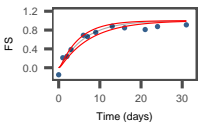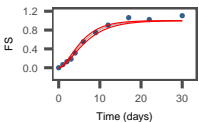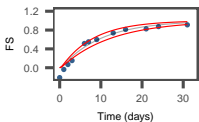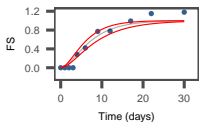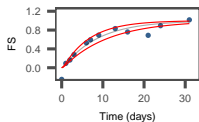

**HNRPK – IITITGTQDQIQNAQYLLQNSVK\_3**

**HS90B – GFVEVYMTPEIDECVQQLK\_2**

**HSP7C – NQVAMNPTNTVFDAK\_2**

AA R2: 0.94 k: 0.309 dk: 0.117

HW R2: 0.95 k: 0.268 dk: 0.0586

AA R2: 0.91 k: 0.183 dk: 0.0525

HW R2: 0.97 k: 0.208 dk: 0.0382

AA R2: 0.97 k: 0.171 dk: 0.0383

HW R2: 0.98 k: 0.108 dk: 0.0118

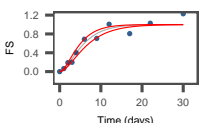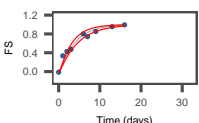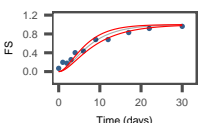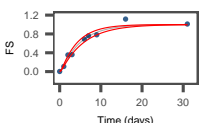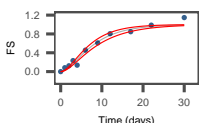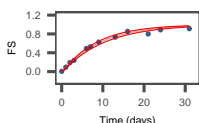

**HS71L(Non-Unique) – IINEPTAAAIYGLDK\_2**

**HSDL2 – DEQINSAVEK\_2**

**HSP7C – RFDDAVVQSDMK\_3**

AA R2: 0.92 k: 0.324 dk: 0.132

HW R2: 0.98 k: 0.122 dk: 0.0138

AA R2: 0.98 k: 0.0732 dk: 0.0101

HW R2: 0.98 k: 0.0461 dk: 0.0052

AA R2: 0.96 k: 0.154 dk: 0.0328

HW R2: 0.99 k: 0.112 dk: 0.0109

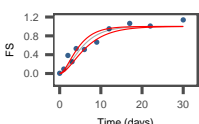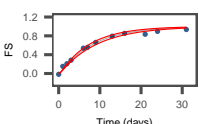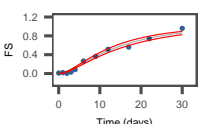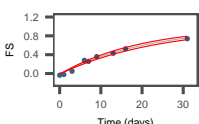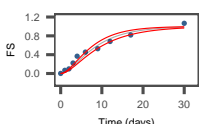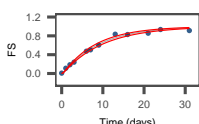

**HS71L(Non-Unique) – IINEPTAAAIYGLDK\_3**

**HSDL2 – LQLQEESQLQK\_2**

**HSP7C – SINPDEAVYGAQVAAILSGDK\_2**

AA R2: 0.96 k: 0.264 dk: 0.0835

HW R2: 0.96 k: 0.196 dk: 0.0488

AA R2: 0.97 k: 0.0832 dk: 0.0131

HW R2: 0.99 k: 0.0727 dk: 0.0066

AA R2: 0.98 k: 0.178 dk: 0.0283

HW R2: 0.99 k: 0.119 dk: 0.00893

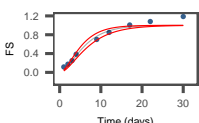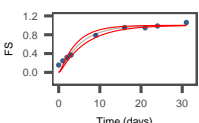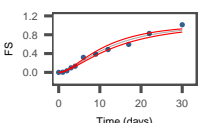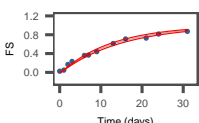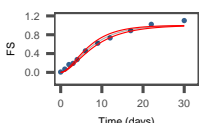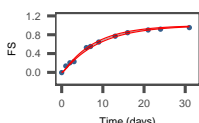

**HS90A(Non-Unique) – ADLNNLGTIAK\_2**

**HSDL2 – VQSMPLQKPHFGAVEEFR\_4**

**HSP7C – SINPDEAVYGAQVAAILSGDK\_3**

AA R2: 0.98 k: 0.327 dk: 0.0747

HW R2: 0.98 k: 0.169 dk: 0.0217

AA R2: 0.97 k: 0.0885 dk: 0.0154

HW R2: 0.96 k: 0.08 dk: 0.0134

AA R2: 0.96 k: 0.239 dk: 0.0697

HW R2: 0.98 k: 0.12 dk: 0.0154

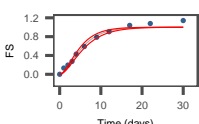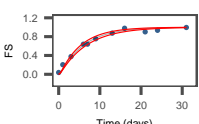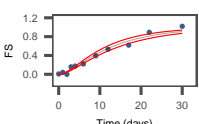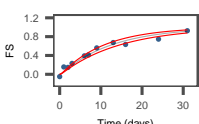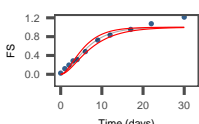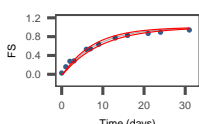

**HSPB6 – APSVALPTAQVSTDSGYFVLLDVK\_2**

AA R2: 0.94 k: 0.288 dk: 0.116

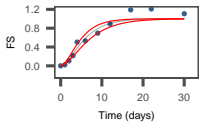

HW R2: 0.98 k: 0.292 dk: 0.0455

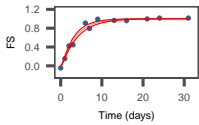**IDH3A – AGGVQVTPLPGDGIGPEISASVMK\_2**

AA R2: 0.97 k: 0.036 dk: 0.00385

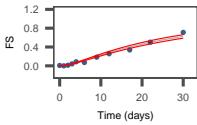

HW R2: 0.99 k: 0.0293 dk: 0.0016

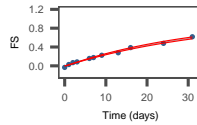**IDHP – GKLDGNQDLIR\_2**

AA R2: 0.99 k: 0.0325 dk: 0.00175

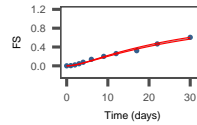

HW R2: 0.99 k: 0.0259 dk: 0.0009

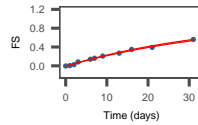**HXK2(Non-Unique) – NILIDFTK\_2**

AA R2: 0.98 k: 0.12 dk: 0.0151

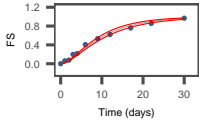

HW R2: 0.93 k: 0.0647 dk: 0.0168

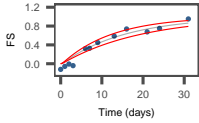**IDH3A – AGGVQVTPLPGDGIGPEISASVMK\_3**

AA R2: 0.95 k: 0.0481 dk: 0.00727

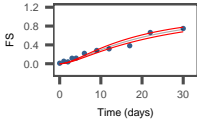

HW R2: 0.99 k: 0.0276 dk: 0.0015

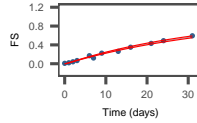**IDHP – LILPHVDVQLK\_2**

AA R2: 0.99 k: 0.0359 dk: 0.00194

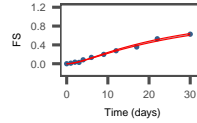

HW R2: 0.99 k: 0.0327 dk: 0.0016

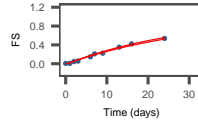**HYES – DFLLGAYQTEFPEGPTEQLMK\_2**

AA R2: 0.92 k: 0.0683 dk: 0.0154

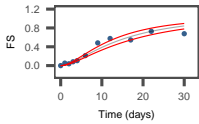

HW R2: 0.91 k: 0.0783 dk: 0.0258

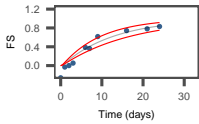**IDH3A – LITEEASKR\_2**

AA R2: 0.99 k: 0.0413 dk: 0.00306

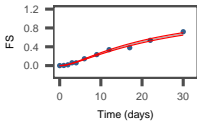

HW R2: 0.95 k: 0.0238 dk: 0.0028

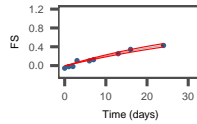**IDHP – LVPGWTKPITIGR\_3**

AA R2: 0.99 k: 0.0378 dk: 0.00206

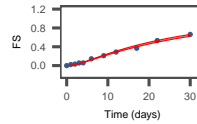

HW R2: 0.98 k: 0.0201 dk: 0.0011

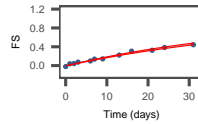**HYES – ILVPALMVTAEK\_2**

AA R2: 0.98 k: 0.117 dk: 0.0164

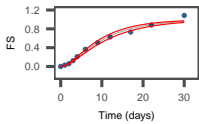

HW R2: 0.98 k: 0.0841 dk: 0.0095

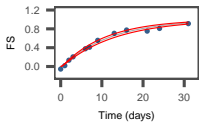**IDHP – DIFQEIFDK\_2**

AA R2: 0.93 k: 0.0287 dk: 0.00375

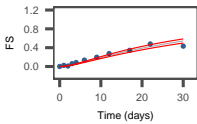

HW R2: 0.95 k: 0.0391 dk: 0.0060

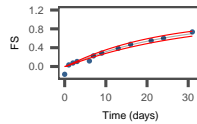**IDHP – SSGGFVWACK\_2**

AA R2: 0.99 k: 0.0332 dk: 0.00203

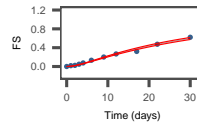

HW R2: 0.98 k: 0.0188 dk: 0.0011

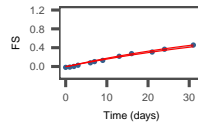**HYES – ITTEEEIEFYQQFK\_3**

AA R2: 0.95 k: 0.126 dk: 0.0293

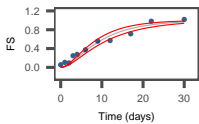

HW R2: 0.97 k: 0.133 dk: 0.0207

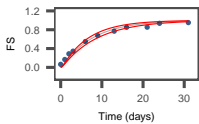**IDHP – DLAGICHLNSVK\_2**

AA R2: 0.99 k: 0.0376 dk: 0.00193

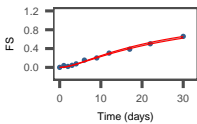

HW R2: 0.95 k: 0.0308 dk: 0.0032

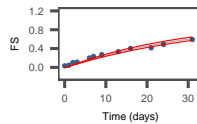**IDHP – VEKPVVEMDGEMTR\_2**

AA R2: 0.93 k: 0.0248 dk: 0.0036E

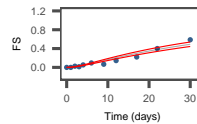

HW R2: 0.93 k: 0.0295 dk: 0.0039

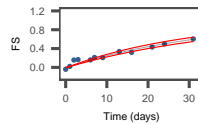**HYES – IYNFLDLTK\_2**

AA R2: 0.98 k: 0.11 dk: 0.0138

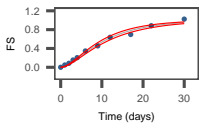

HW R2: 0.97 k: 0.112 dk: 0.0206

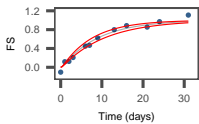**IDHP – DQTNQDVTDLSALATQK\_3**

AA R2: 0.98 k: 0.0307 dk: 0.0026E

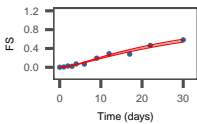

HW R2: 0.91 k: 0.0344 dk: 0.0051

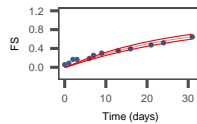**IDHP – VEKPVVEMDGEMTR\_3**

AA R2: 0.98 k: 0.0344 dk: 0.0028E

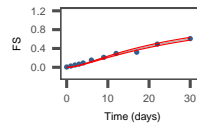

HW R2: 0.99 k: 0.0272 dk: 0.0017

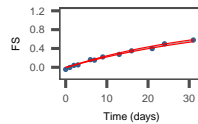

IGHM - LVESGFTDPVTIENK\_2

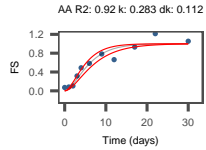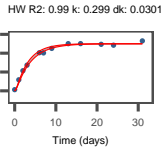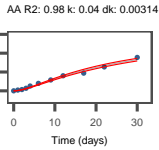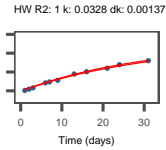

KCRB - LGFSEVELQMVVDGVK\_2

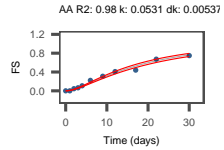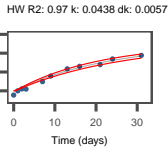

IGKC - DSTYSMSSTLTLTK\_2

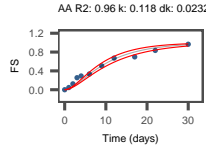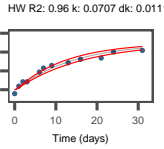

IVD - GSNTCELVFEDCK\_2

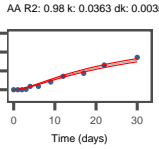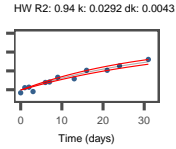

KCRB - LGFSEVELQMVVDGVK\_3

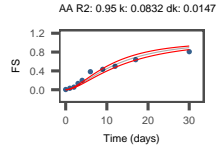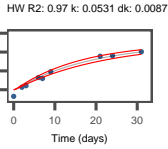

IPYR - DFAVDIIK\_2

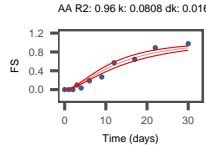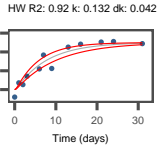

KAD1 - IIFVGGPGSGK\_2

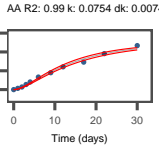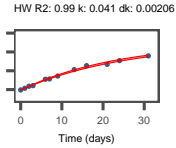

KCRM - DKETPSGFTLDDVIQTGVDNPGHPF\_3

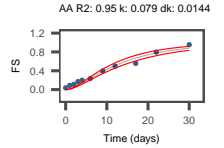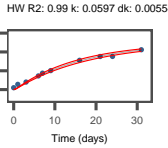

IPYR - LKPGYLEATVDWFR\_3

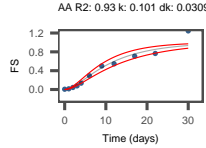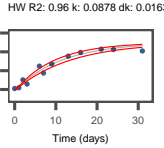

KAD1 - VNAEGTVDTVFSEVCTYLSLK\_2

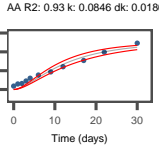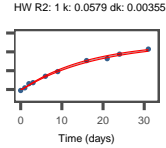

KCRM - IMTVGCVAGDEESYTVFK\_2

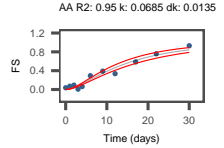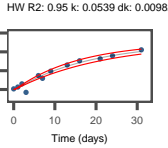

IPYR2 - HVAGHYISPFDIPLK\_4

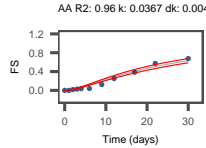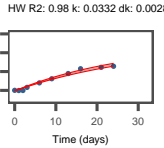

KAD1 - VNAEGTVDTVFSEVCTYLSLK\_3

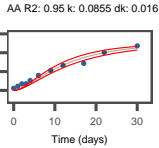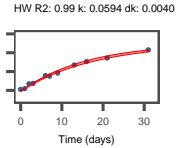

KCRM - TVGCVAGDEESYTVFK\_2

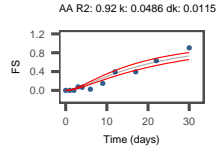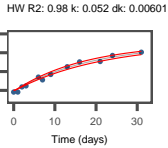

IVD - AQEIDQTNDFK\_2

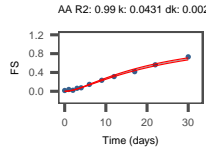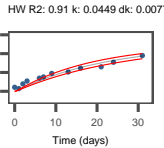

KAP2 - NLDQEQLSQLVDAMFEK\_3

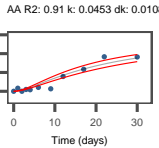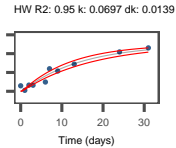

KCRM - VLTPDLYNK\_2

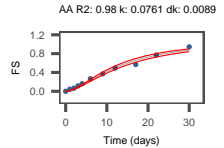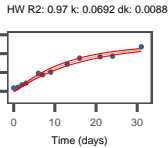

KCRM\_HUMAN,sp|P07310|KCRM(Non-Unique) - FCVGLQK\_2

KCRS - LIDDFLFDKPVSPLLTCAGMAR\_3

KPYM - AEGSDVANAVLDGADCMILSGETAK\_2

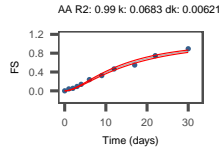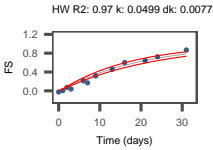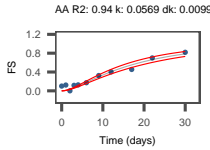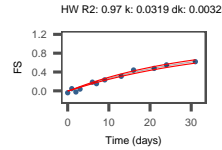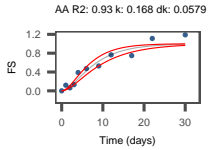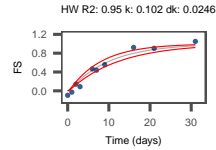

KCRS - EVENVAITALEGLK\_2

KCRS - M[15.9949]TPSGYTLDDQCIQTVDNPGHPFIK\_3

KPYM - CDENILWLDYK\_2

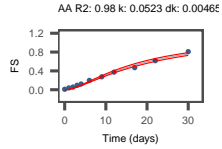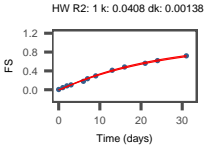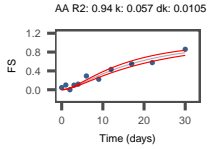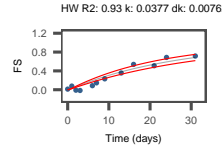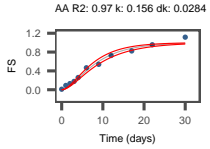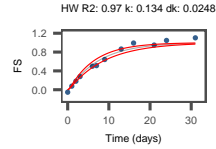

KCRS - EVENVAITALEGLK\_3

KCRS - REVENVAITALEGLK\_2

KPYM - EATESFASDPILYRPAVALDTK\_3

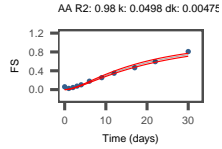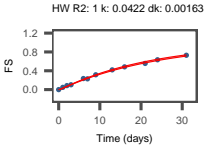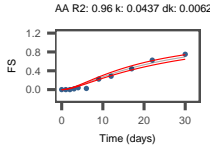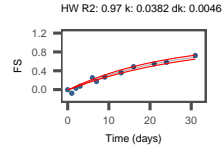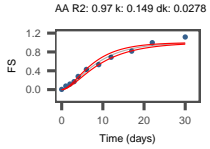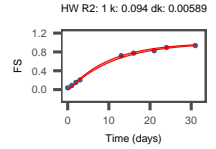

KCRS - HNNCMAECLTPTIYAK\_2

KCRS - REVENVAITALEGLK\_3

KPYM - GVNLPGAVDLPVASEK\_2

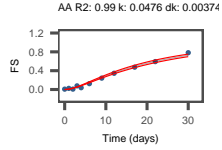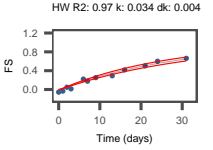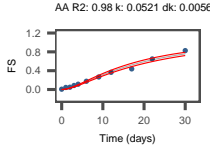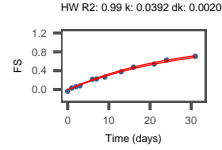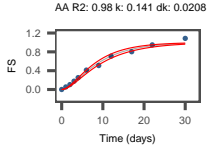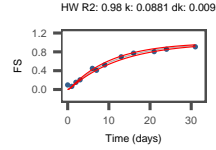

KCRS - LIDDFLFDK\_3

KCRS - SEVELVQIVGDVGNVYLDCEK\_2

KPYM - LNFSGHTHEYHAETIK\_4

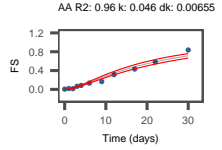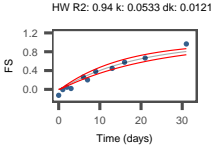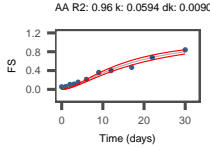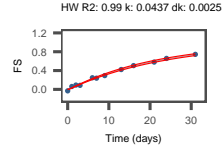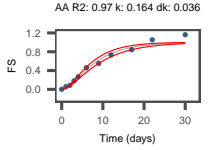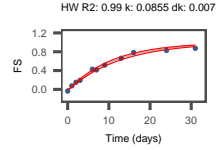

KCRS - LIDDFLFDKPVSPLLTC\_3

KCRU(Non-Unique) - TLDQCIQTVDNPGHPFIK\_3

KPYM - VNLAMDVGK\_2

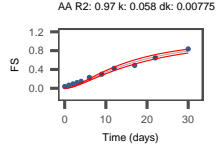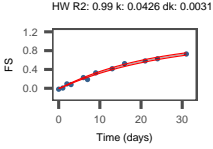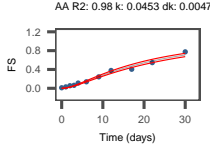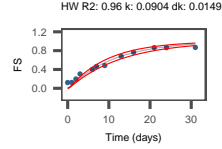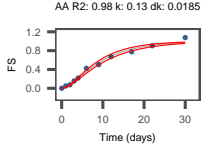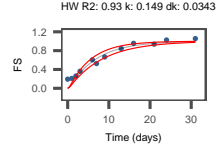



LDHB - IHPVSTMVK\_2

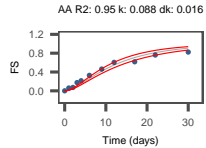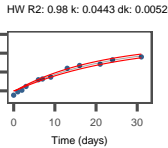

LDHB - YSPDCTIIVSNPVDILTYVTWK\_2

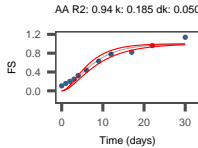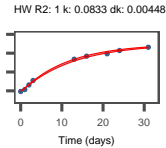

LPPRC - QNVFSTSETYTLIGLLLSK\_2

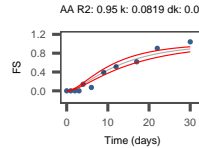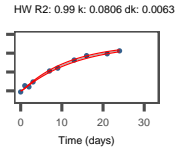

LDHB - ITVVGVGQVGMACAISILGK\_2

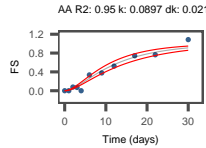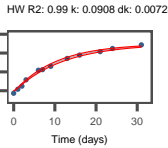

LEG1 - LNMEAINMAADGDFK\_2

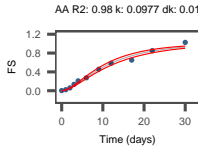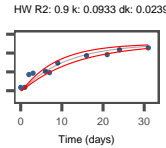

LUM - LPAGLPTSLLLTYLDNNK\_2

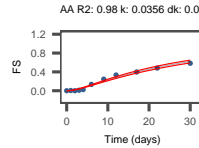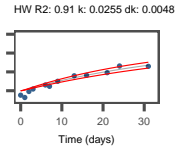

LDHB - ITVVGVGQVGMACAISILGK\_3

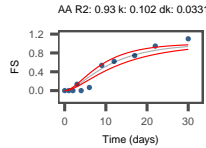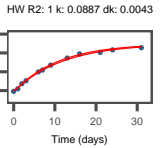

LGUL - VLGLTLQK\_2

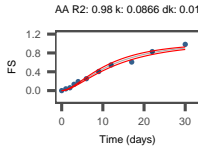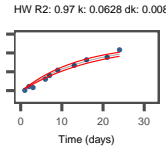

M2OM - AVVNAAQLASYSQSK\_3

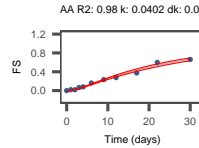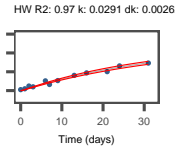

LDHB - LIASVADDEAAVPNNK\_2

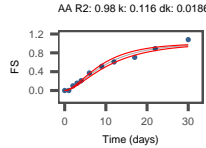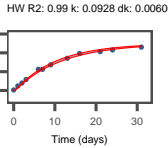

LONM - LAQPYGVFLK\_2

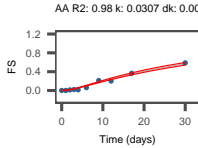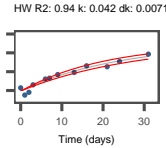

M2OM - FLFGGLAGMGATVFVQPLDLVK\_2

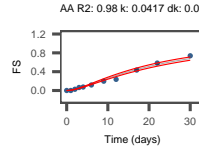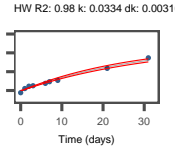

LDHB - SADTLWDIQK\_2

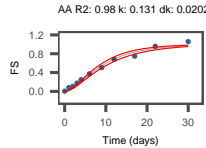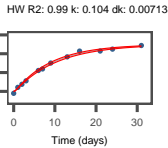

LPPRC - DFAETHIK\_2

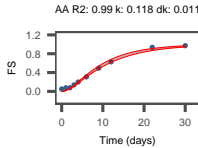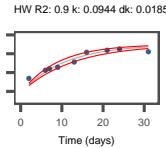

M2OM - FLFGGLAGMGATVFVQPLDLVK\_3

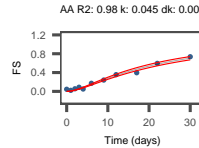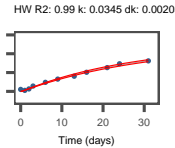

LDHB - SLADELALVDLEDK\_3

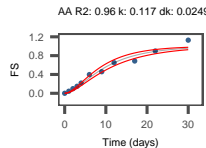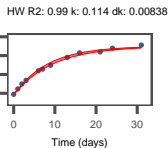

LPPRC - PVTDLRLQLVDSGK\_2

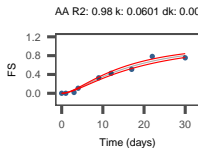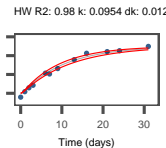

M2OM - YEGFFSLWK\_2

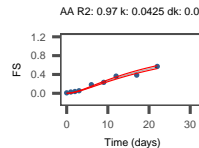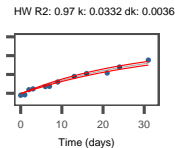

MAAI – MISDLIASGIQLQLNSVLK\_2

MDHM – GYLGPQLPDLCK\_2

MGDP1 – TSEIQGANQLLEFLDLGK\_2

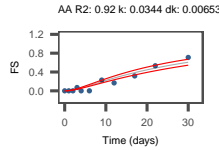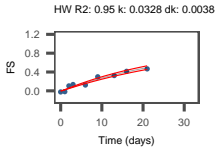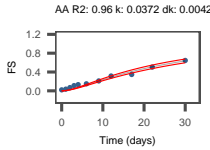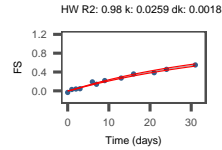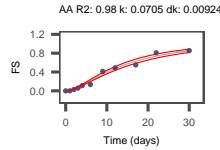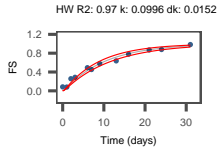

MCAT – DVPASGMFYMTYEWLK\_2

MDHM – IIANPVNSTIPTAEVFK\_2

MIC13 – DSWNSGIISVMSALSAPSK\_3

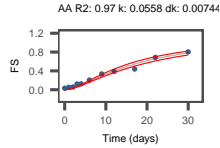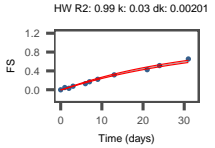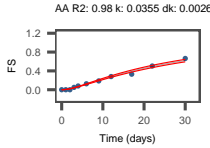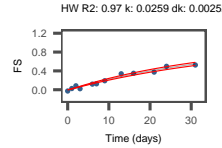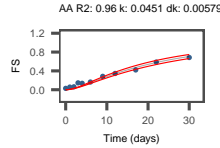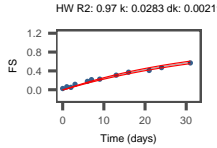

MDHC – HSSTQYDPVNHAK\_3

MDHM – IQEAGTEVVK\_2

MIC26 – GYIVIEDLWK\_2

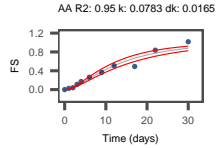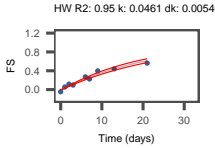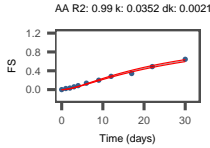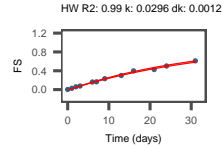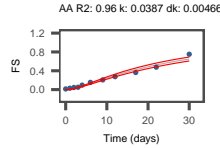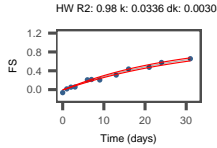

MDHC(Non-Unique) – SAPSIPK\_2

MDHM – VAVLGASGGIQLSLLK\_3

MIC27 – QLVRPDLPIYAPPLHSK\_4

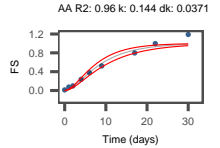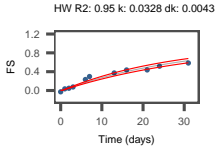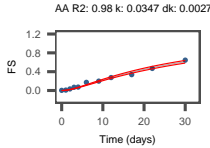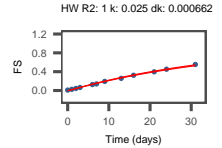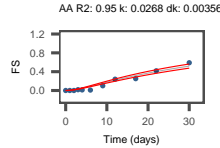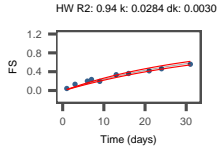

MDHC – SLLYSIGNSVFGK\_2

MDHM – VNVPIVGHGAK\_2

MIC60 – AHQLWLSVEALK\_3

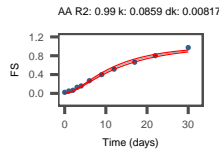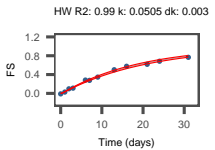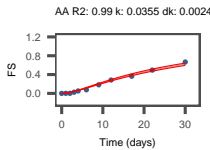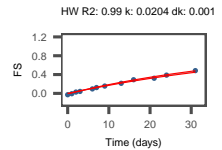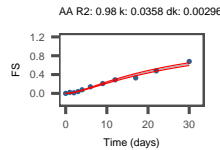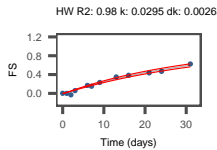

MDHM – ANTFAELK\_2

MDHM – VNVPIVGHGAK\_3

MIC60 – LFGMVLGSAPYTVLPLK\_2

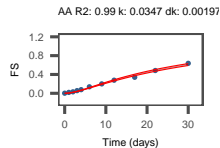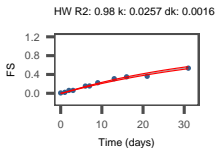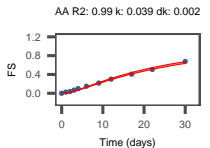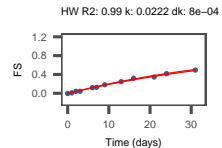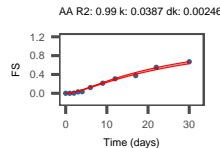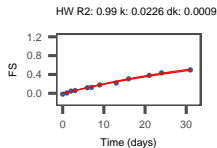

MIC60 – TSSVLTQTITAQNAAVQAVK\_2

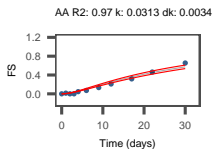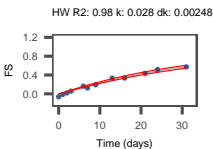

MLRV – IEGSSNVFSM[15.9949]FEQTQIEFK\_2

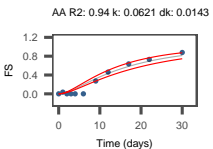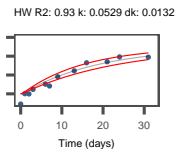

MLRV(Non-Unique) – TVFLTMFGEK\_2

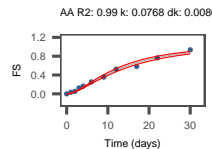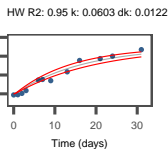

MIC60 – TSSVLTQTITAQNAAVQAVK\_3

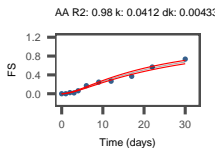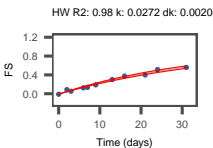

MLRV – NEEIDEM[15.9949]JK\_2

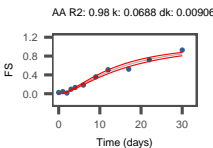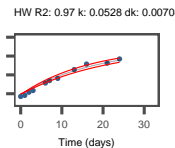

MMSA – EEIFGPVLVLELETDLDEAIK\_2

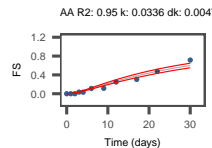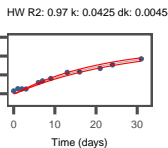

ML12B(Non-Unique) – ATSNVFAMFDQSQIEFK\_3

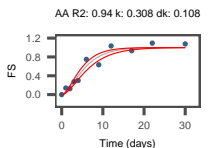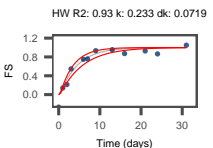

MLRV – NEEIDEMIK\_2

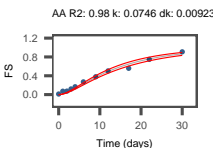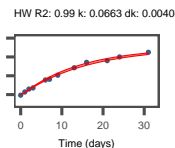

MMSA – EEIFGPVLVLELETDLDEAIK\_3

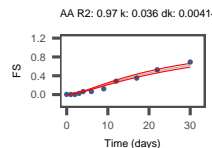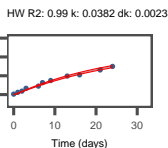

MLRV(Non-Unique) – EAPGPINFVFLTM[15.9949]FGEK\_3

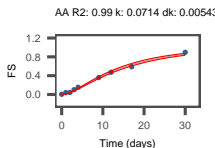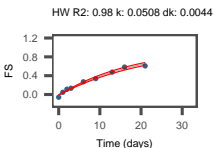

MLRV – NLVHIITHGEEKD\_2

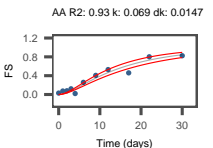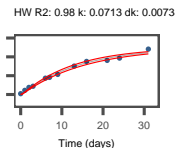

MMSA – LITLEQ GK\_2

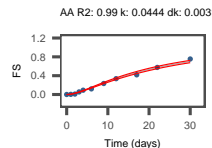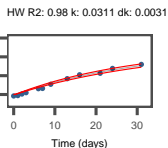

MLRV(Non-Unique) – EAPGPINFVFLTMFGEK\_3

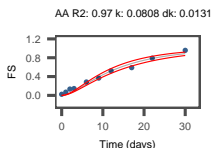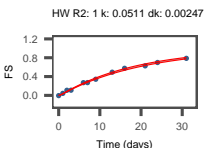

MLRV – NLVHIITHGEEKD\_4

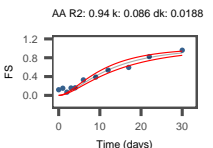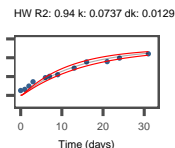

MMSA – QGIQFYTLK\_2

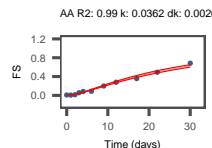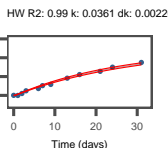

MLRV – GADPEITILNAFK\_3

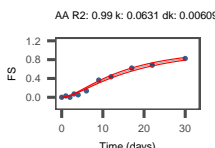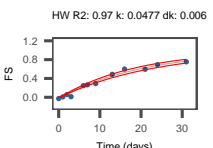

MLRV – SMFEQTQIEFK\_2

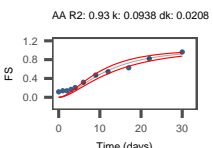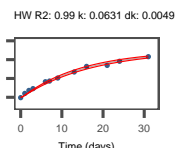

MOES – EVWFFGLYQDTK\_2

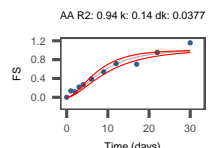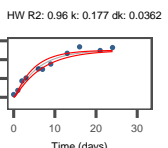





MYG\_HUMAN\_sp|P04247|MYG(Non-Unique) - GLSDGEWQLVLNVWGK\_3

MYH3(Non-Unique) - PLNETVGLYQK\_2

MYH6(Non-Unique) - EDQVM[15.9949]QGNPPK\_2

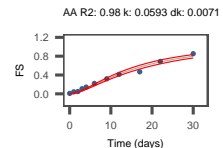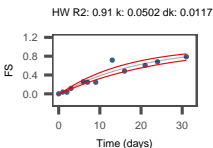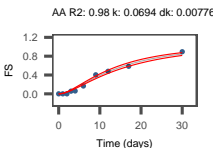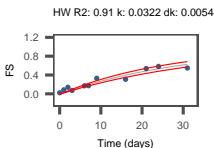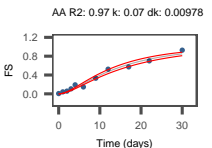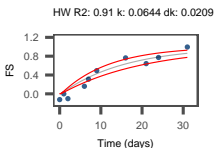

MYH11(Non-Unique) - NVHELEK\_2

MYH3(Non-Unique) - TKYETDAIQR\_2

MYH6(Non-Unique) - EDQVMQGNPPK\_3

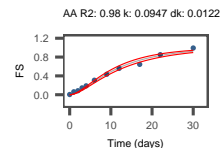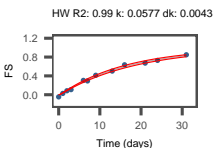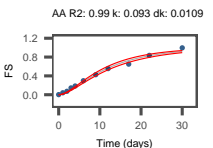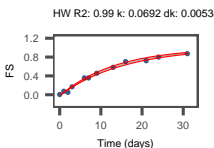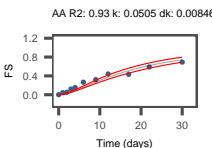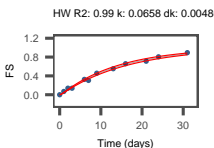

MYH3(Non-Unique) - ADIAESQVNK\_2

MYH3(Non-Unique) - TKYETDAIQR\_3

MYH6 - EFDISQNSK\_2

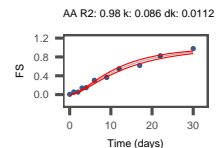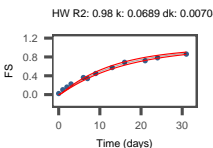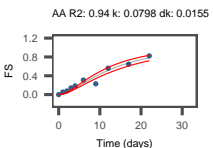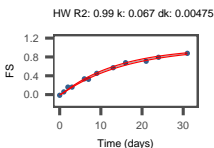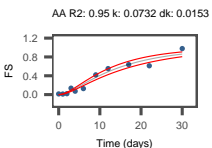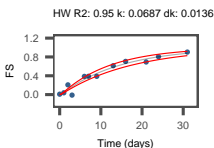

MYH3(Non-Unique) - LASADIETYLEK\_2

MYH6(Non-Unique) - AQLEFNQIK\_2

MYH6 - EMANMKEEFGR\_2

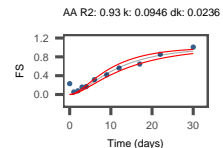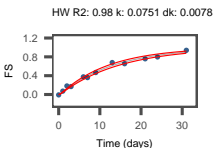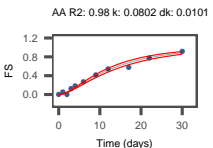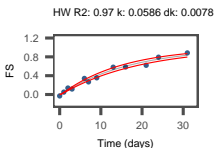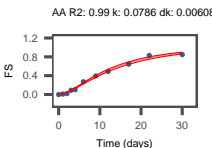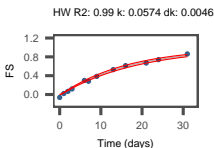

MYH3(Non-Unique) - LQDLVDK\_2

MYH6 - DTQLQLDDAVHANDLK\_2

MYH6 - EMANMKEEFGR\_3

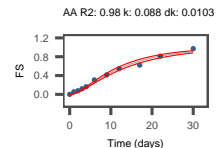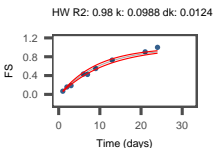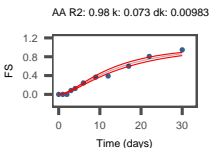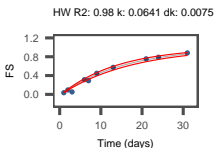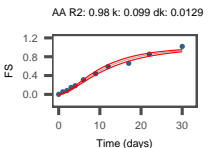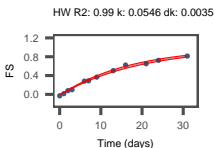

MYH3(Non-Unique) - LQQFNHHMFVLEQEYK\_4

MYH6 - DTQLQLDDAVHANDLKENIAIVER\_3

MYH6 - FSLVHYAGTVDYINIMGWLEK\_3

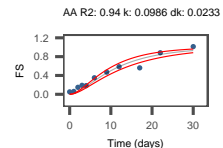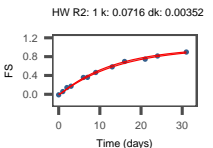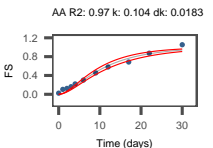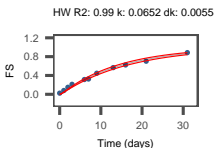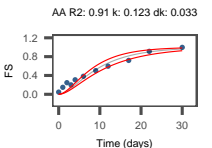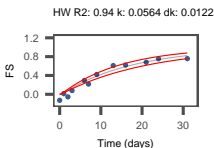

MYH6 – GQSVQVQVYYSIGALAK\_3

MYH6 – KAPGVMDNPLVMHQLR\_3

MYH6 – KMESDLTQLQTEVEEAQCEQR\_3

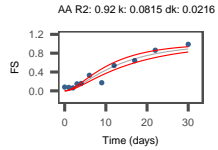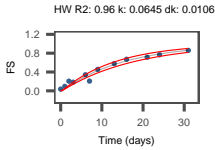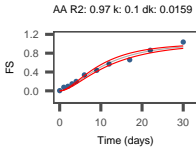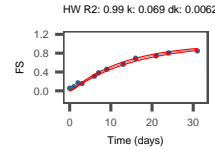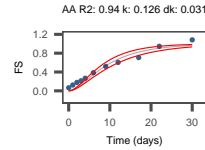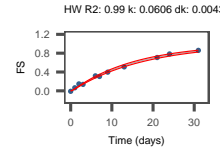

MYH6 – IEDEQALALQLQK\_3

MYH6(Non-Unique) – KLAQEQLIETSER\_2

MYH6(Non-Unique) – KPPELLDML\_2

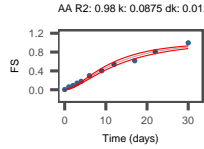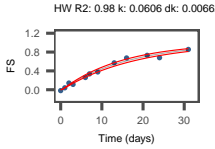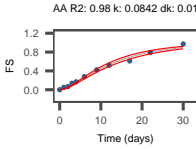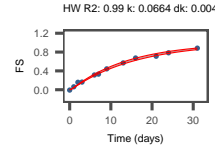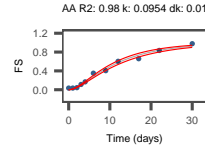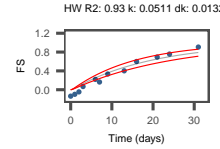

MYH6(Non-Unique) – IEDM[15.9949]AMTLFLHEPAVLYNLK\_3

MYH6(Non-Unique) – KLAQEQLIETSER\_3

MYH6 – KPPELLDMLLVTNPNPYDAF\_2

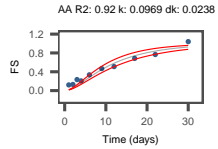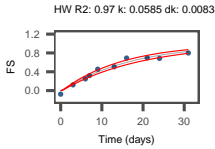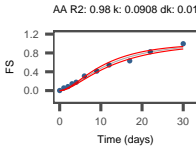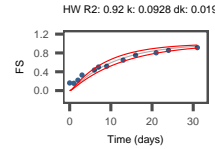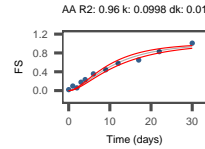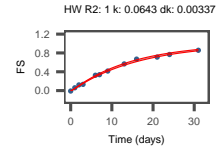

MYH6(Non-Unique) – IEDMAMTLFLHEPAVLYNLK\_2

MYH6 – KMEGDLNEM[15.9949]EIQLSQANR\_3

MYH6 – KPPELLDMLLVTNPNPYDAF\_3

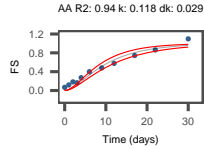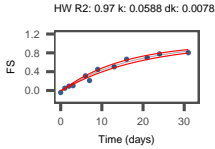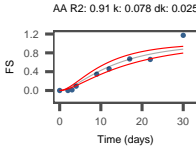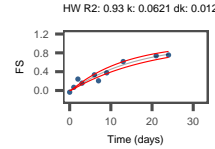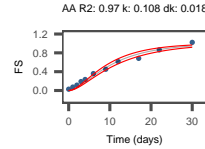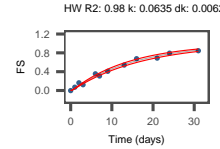

MYH6(Non-Unique) – IHFGATGK\_2

MYH6 – KMEGDLNEMEIQLSQANR\_2

MYH6(Non-Unique) – KVQHELDEAEER\_2

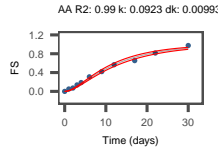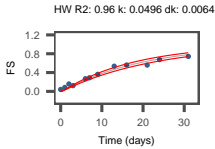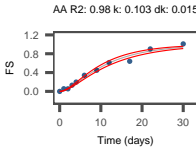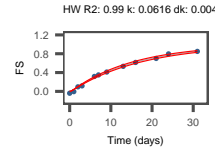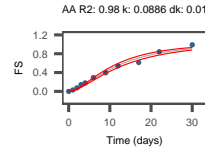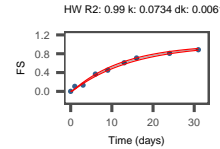

MYH6(Non-Unique) – INATLETK\_2

MYH6 – KMEGDLNEMEIQLSQANR\_3

MYH6(Non-Unique) – KVQHELDEAEER\_4

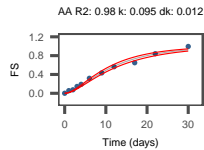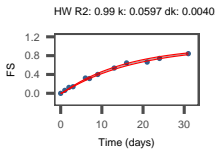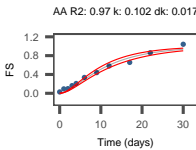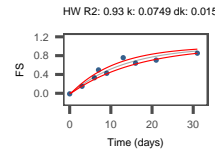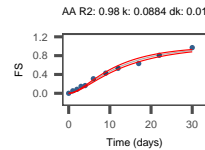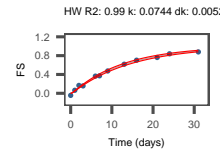

MYH6(Non-Unique) – LEDEEM[15.9949]NAELTAK\_2

MYH6 – LMATLFSTYASADTGDGSK\_3

MYH6 – LTGAIMHYGNMK\_3

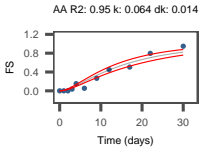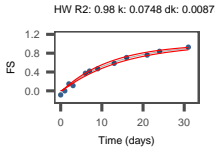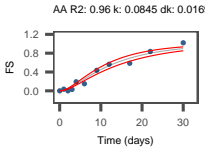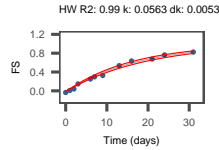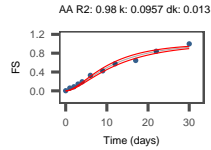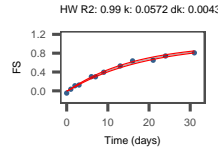

MYH6(Non-Unique) – LEEAGGATSQIEM[15.9949]NK\_2

MYH6(Non-Unique) – LMGLNSADLLK\_2

MYH6(Non-Unique) – LTQESIMDLENDK\_2

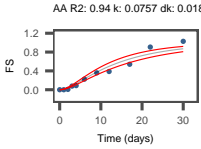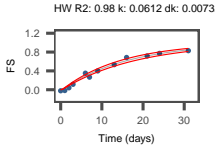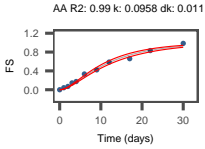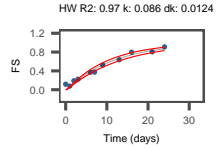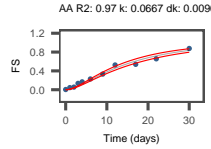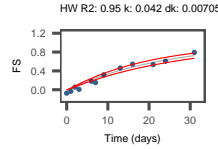

MYH6(Non-Unique) – LELDDVTSNMEQIHK\_3

MYH6 – LSYTQQM[15.9949]EDLKR\_3

MYH6(Non-Unique) – LYDNHLGK\_2

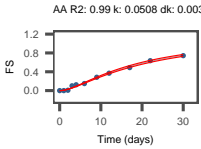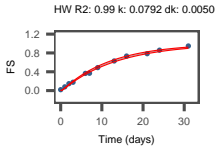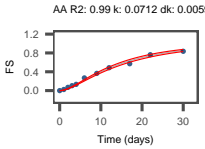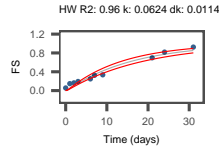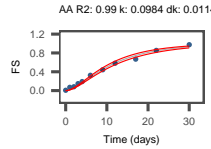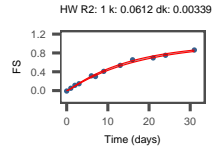

MYH6(Non-Unique) – LHPEAVLYNLK\_2

MYH6 – LSYTQQMEDLK\_2

MYH6 – NLTEEMAGLDEIIAK\_3

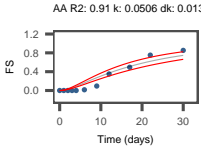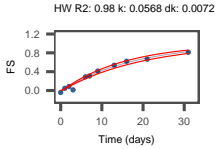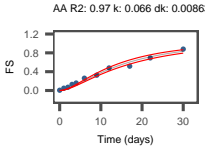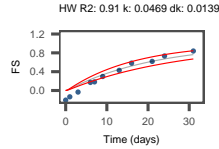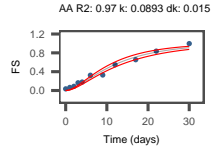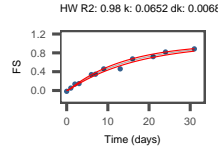

MYH6(Non-Unique) – LHPEAVLYNLK\_3

MYH6 – LTGAIM[15.9949]HYGNMK\_2

MYH6 – NYHFQILSNK\_3

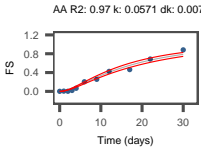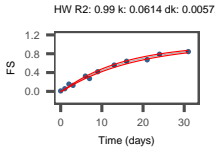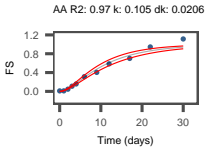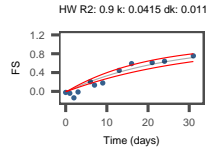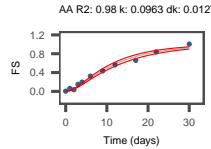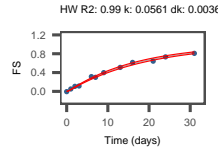

MYH6(Non-Unique) – LLLGSLDIDHNQYK\_2

MYH6 – LTGAIMHYGNMK\_2

MYH6(Non-Unique) – PMGMSILEECCMPFK\_2

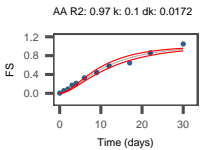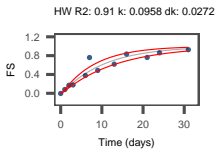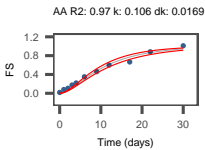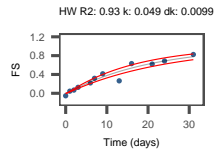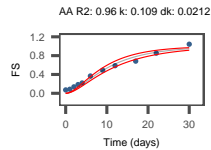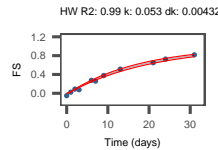

MYH6(Non-Unique) – PMGMSILEEECMFPK\_3

MYH6 – SVQQVYYSIGALAK\_2

MYH7 – QEAHFSLVHYAGTVDYNILGWLQK\_4

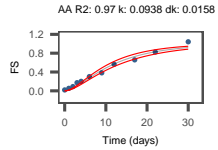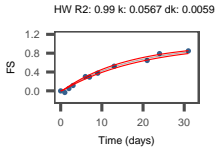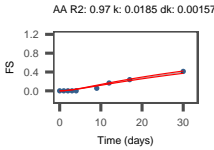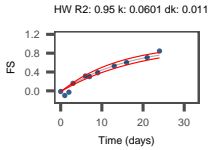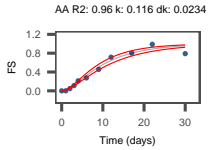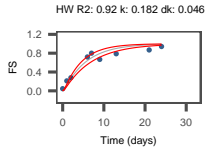

MYH6(Non-Unique) – QAEEAEQANTLSK\_3

MYH6(Non-Unique) – VRELENELEAEQK\_3

MYH7B(Non-Unique) – AITDAAMMAEELK\_3

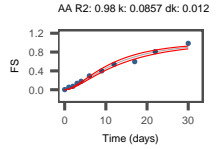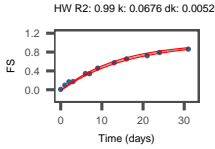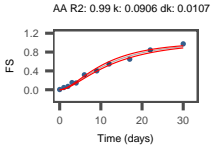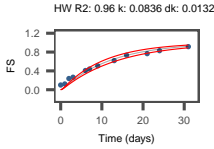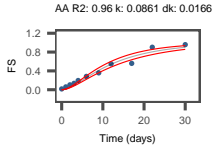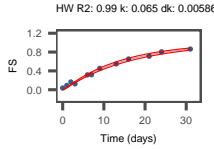

MYH6 – QEAHFSLVHYAGTVDYNIMGWLEK\_3

MYH6(Non-Unique) – VRELENELEAEQKR\_4

MYH7B(Non-Unique) – ILEEECMFPK\_2

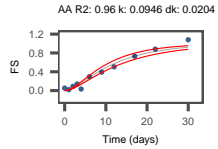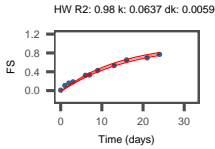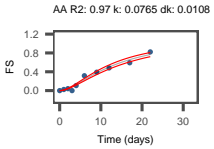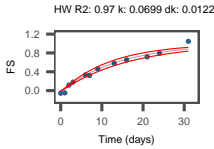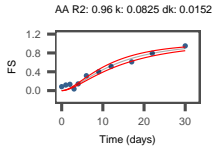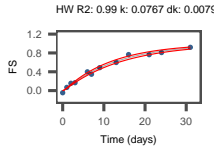

MYH6 – QREEQAEPDGTEDADK\_2

MYH6(Non-Unique) – YEESSQSELESSQK\_2

MYH7B(Non-Unique) – MFVLEQEEYK\_2

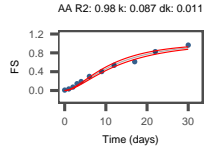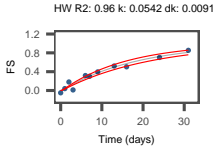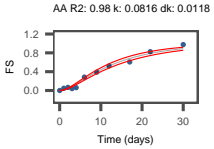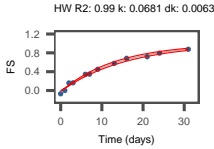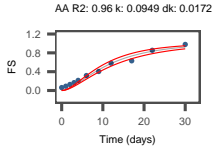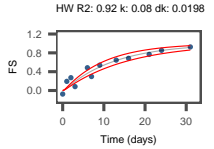

MYH6(Non-Unique) – RQAEEAEQANTLSK\_3

MYH6(Non-Unique) – YEESSQSELESSQK\_3

MYH8(Non-Unique) – LEQQVDLEGSLEQEK\_2

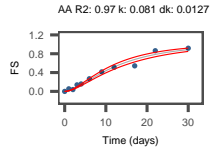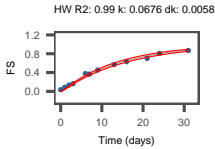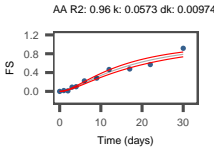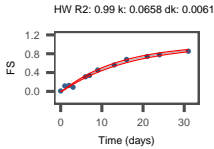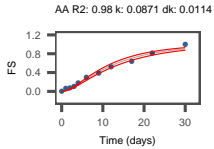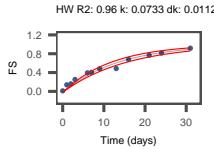

MYH6(Non-Unique) – SQNTSLINQK\_2

MYH6 – YSIGALAK\_2

MYH9 – IIGLDQVAGMSETALPGAFK\_2

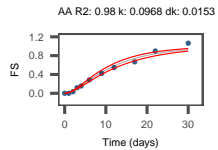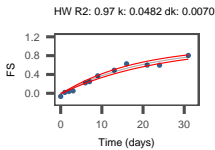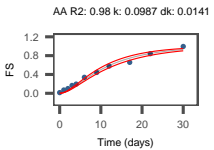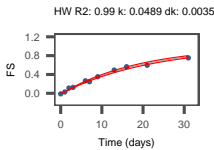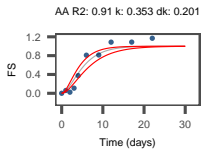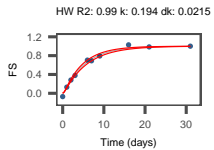

**MYH9 – VISGVLQLGNIAFK\_2**

**MYL3 – NKDTGTIEDFVEGLR\_2**

**MYOM1 – DAGFYEVILK\_2**

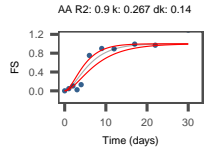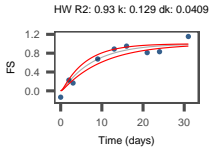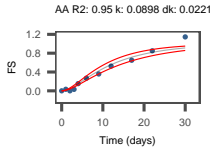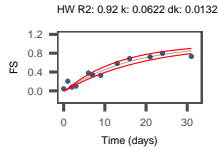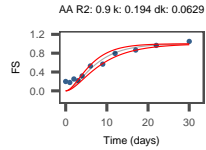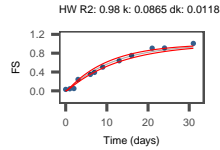

**MYL3 – AAPAPAAAPAAAPAEPEPERK\_2**

**MYL3 – NKDTGTIEDFVEGLR\_3**

**MYOM1 – DGICTLLITEFSK\_2**

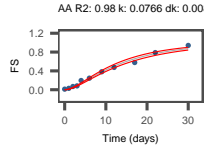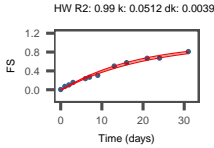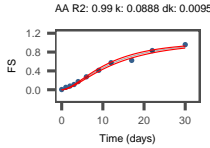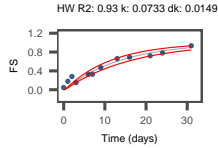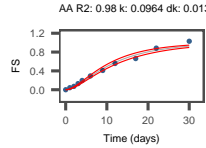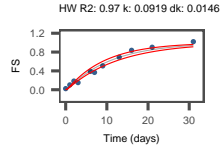

**MYL3 – IEFTPEQIEEFKEAF\_2**

**MYL6 – VLDFEHFLPMLQTVAK\_3**

**MYOM1 – DSMVLGWK\_2**

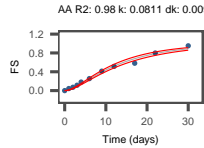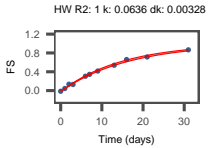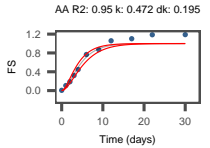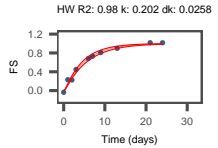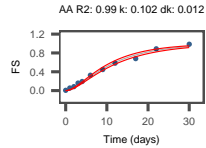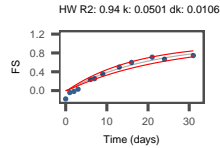

**MYL3 – LTEDVEVK\_2**

**MYOM1 – ATGHSTLVIGDYYK\_3**

**MYOM1 – FALFDLVEGK\_2**

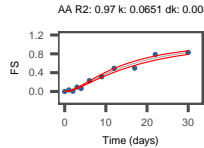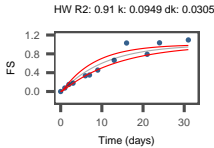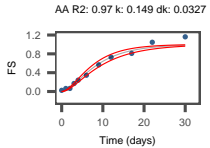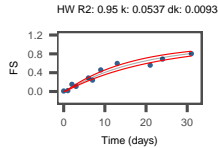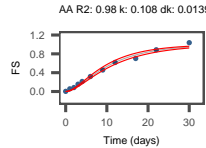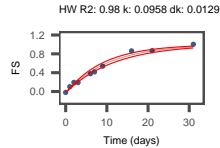

**MYL3 – MMDFETFLPM[15.9949]LQHISK\_3**

**MYOM1 – AVNAAGLSEYSQDSEAEVK\_2**

**MYOM1 – LLALSQEHK\_2**

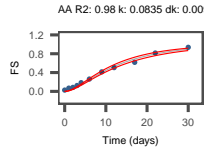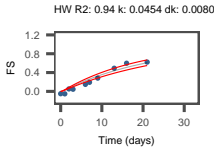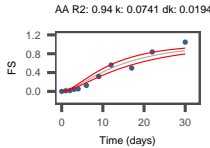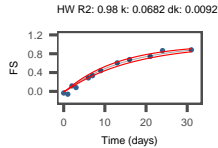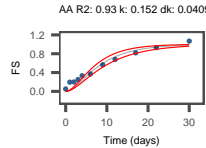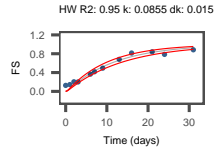

**MYL3 – MMDFETFLPMLQHISK\_2**

**MYOM1 – CEVGTDTWSQCNDTPVK\_2**

**MYOM1 – LINEDHLLHAPEFIKPR\_5**

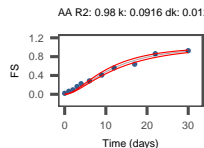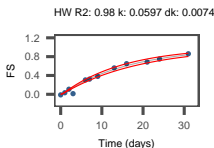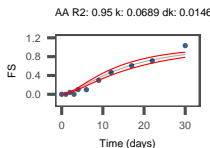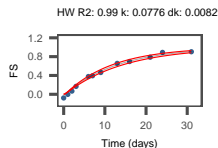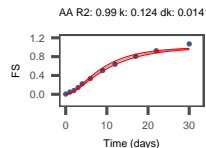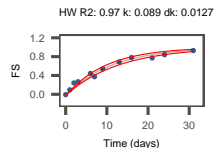

MYOM1 – LVDEAFQDLMTVECK\_2

MYOM1 – STLVLIGDVYK\_2

MYOM1 – YGMHTLEISK\_3

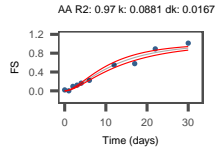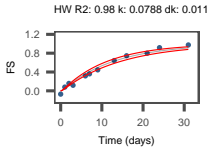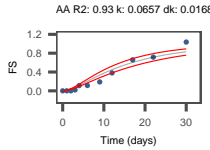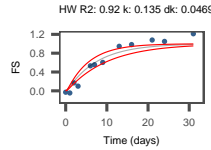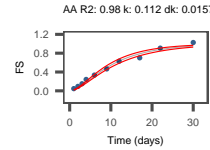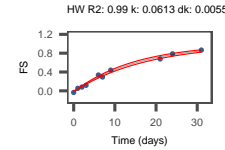

MYOM1 – LVDEAFQDLMTVECK\_3

MYOM1 – TAFFTISGVSTADSGK\_2

MYOM1 – YKGELDESLLR\_2

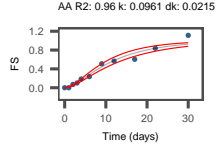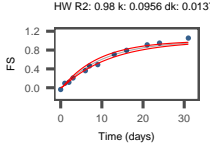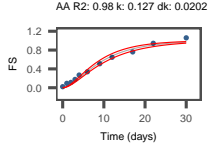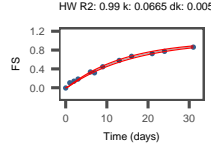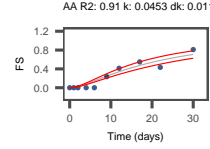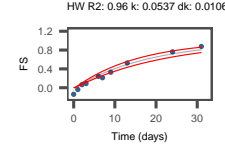

MYOM1 – NQVPINVHANPGK\_3

MYOM1 – TASAYDYGSHGLTDSLLLEDYSSK\_3

MYOZ2 – SPPNENIAPGYSGLPK\_2

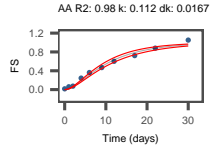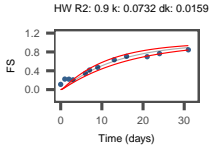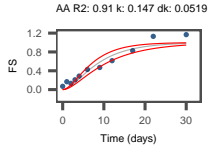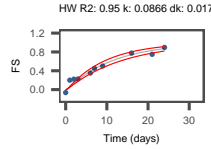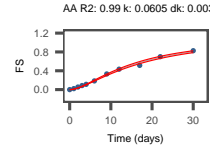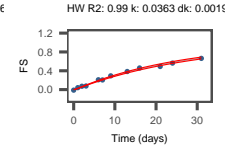

MYOM1 – NSLVLQWKPPVYSGR\_3

MYOM1 – TLEETQTYHGK\_2

MYOZ2 – SPWEQAIGSDPELLEALYPK\_2

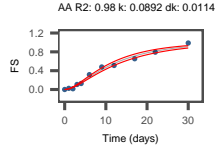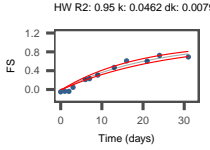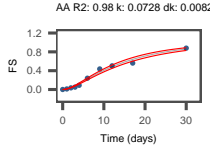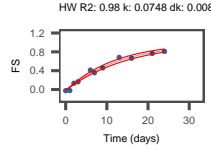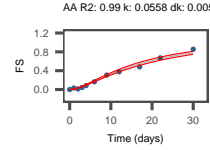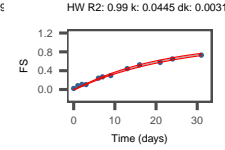

MYOM1 – PSDLAGPVVAETRPGTK\_3

MYOM1 – VLGLPDVVTIQEGK\_2

MYOZ2 – SPWEQAIGSDPELLEALYPK\_3

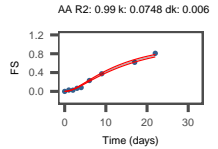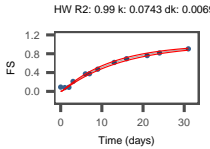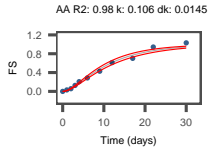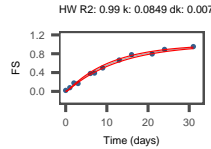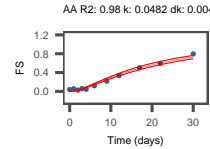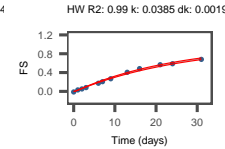

MYOM1 – SGVTGEQIWLQINEPTPNDK\_2

MYOM1 – VVITPEIK\_2

MYPC3 – AHNVAGGGPIVTK\_2

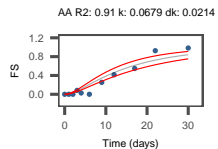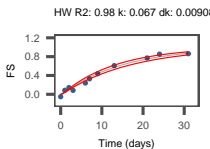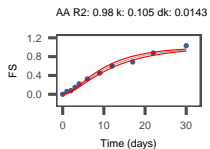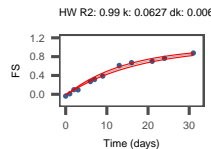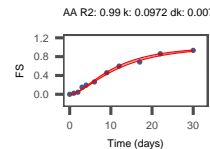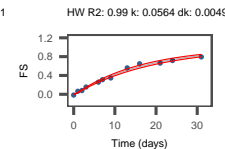





**NAC1 – ALLLNLGGFTLGK\_2**

**NDKA(Non-Unique) – GLVGEEK\_2**

**NDRG2 – GWMDWAHK\_3**

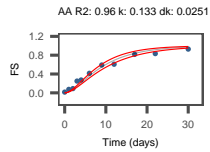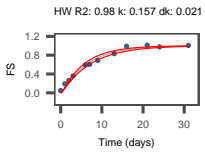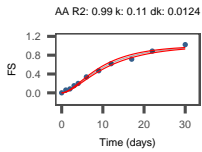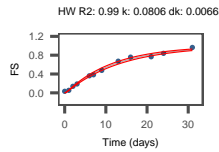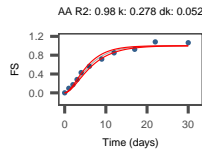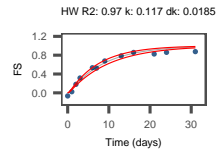

**NAC1 – EIEQLIELANYQVLSQQK\_3**

**NDKA(Non-Unique) – TFIKPDGVQR\_2**

**NDRG2 – LDPTQTSFLK\_2**

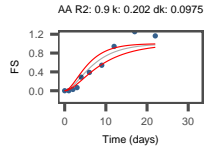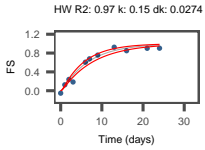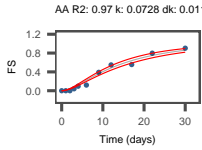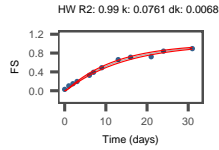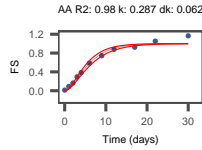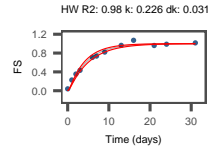

**NACAM – GLPSAVALAPQTVPEK\_2**

**NDKA(Non-Unique) – TFIKPDGVQR\_3**

**NDRG2 – MADSGGQPQTGPK\_2**

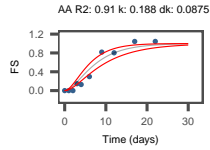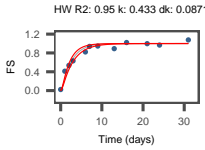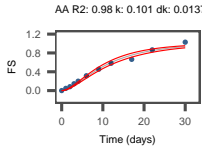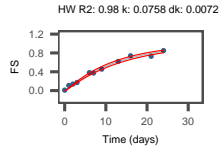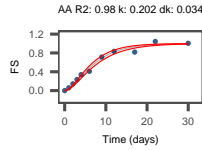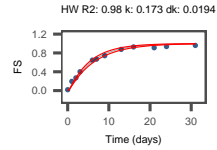

**NACAM – QPLLESAPGVSLESPK\_2**

**NDKA(Non-Unique) – VMLGETNPADSKPGTIR\_3**

**NDRG2 – RPAIFTYHDVGLNYK\_3**

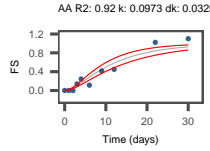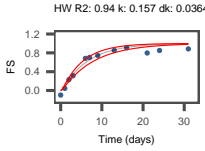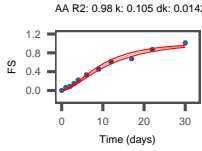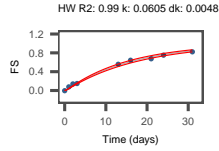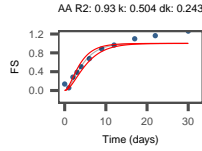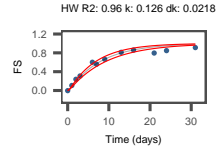

**NACAM – TAAPEETSTTPSPK\_2**

**NDKB – DRPFPGLVK\_2**

**NDRG2 – RPAIFTYHDVGLNYK\_4**

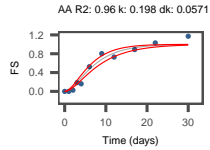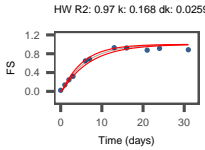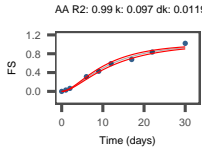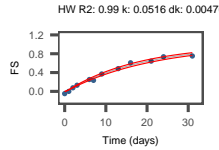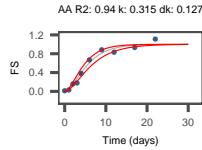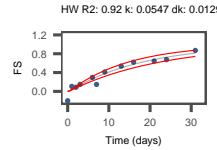

**NAR3 – YLYNPDMDNQK\_2**

**NDKB – DRPFPGLVK\_3**

**NDRG2 – YALNHPDTEVGLLINDPNAK\_3**

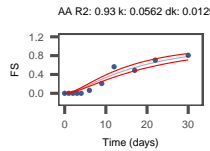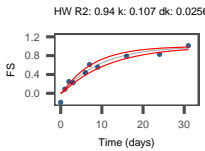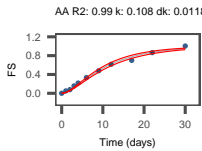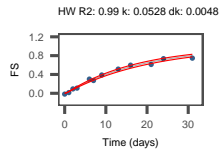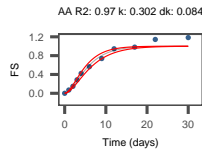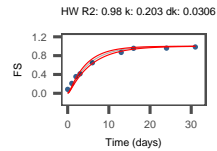

NDUA2 – AMQNVLSGK\_2

NDUA9 – WFLAVPLVSLGFK\_2

NDUAD – IALMPLFQAEK\_2

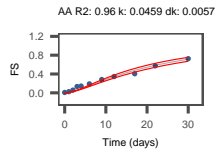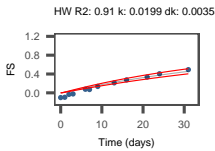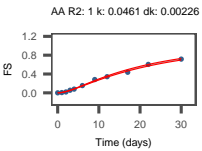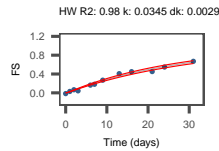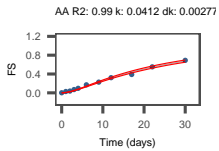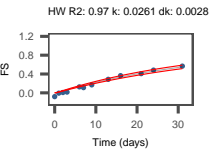

NDUA3 – YASMINK\_2

NDUAA – VITVDGNICSGK\_2

NDUB1 – ELRPNEEVTWK\_3

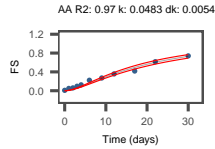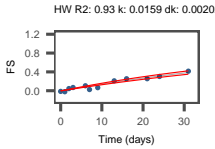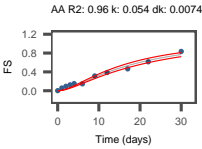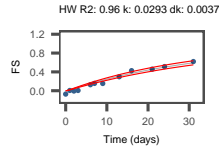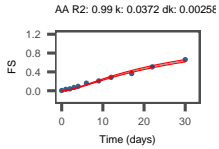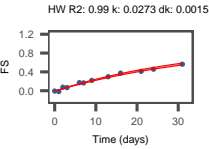

NDUA6 – VVDLLVIK\_2

NDUAA – VVEDIEYLK\_2

NDUB3 – IEGTPLETVQK\_2

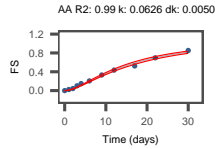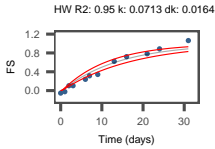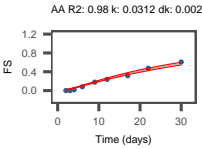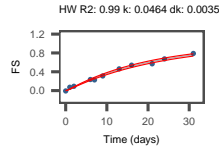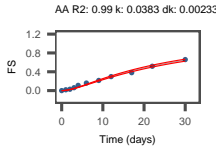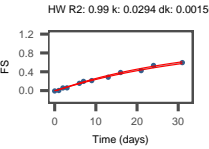

NDUA7 – AAESSAMAATEK\_2

NDUAB – EKPDPLNYFIGGCAGGLTLGAR\_3

NDUB3 – YMGGFAGNITFPSVILK\_2

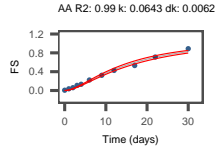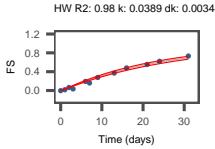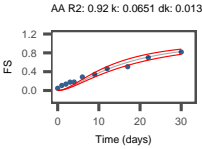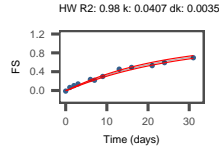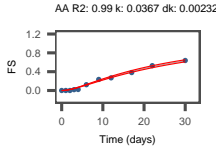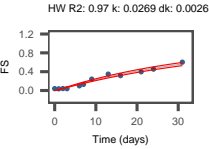

NDUA8 – LGWVRPDLGQLSK\_3

NDUAB – LEGWELFPTK\_2

NDUB4 – YKPAPLATLPSTLDAPEYDVPETR\_3

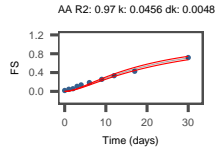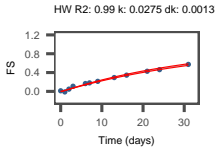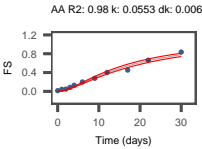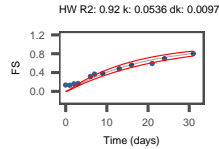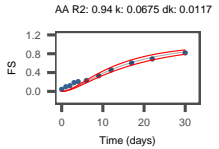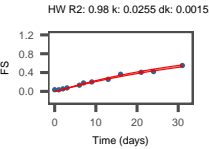

NDUA9 – LFLGSPFEPWTK\_2

NDUAC – IGLTVGEDK\_2

NDUB5 – EFIDHSPK\_2

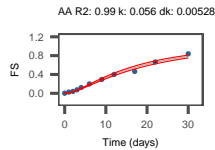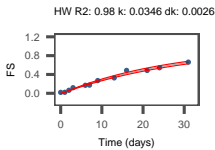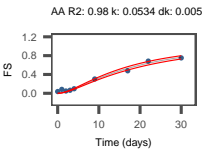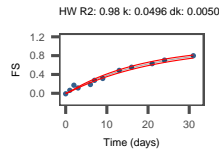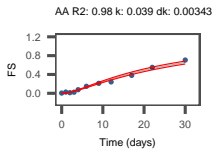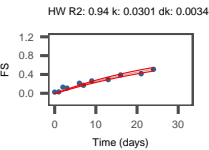

NDUB5 – LFVVKPSLYYDAR\_3

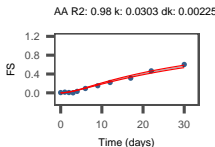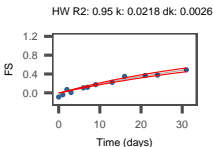

NDUBB – QREPTMQWQEDPEPEDENYAK\_3

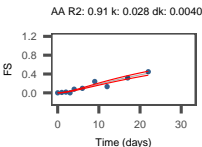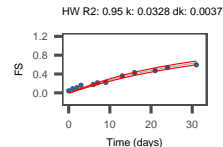

NDUS1 – LVNQVELADLPVPPQLTIK\_2

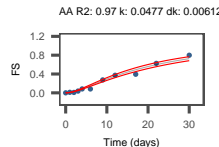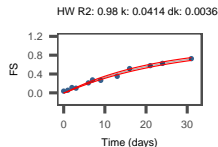

NDUB5 – NFYDGPEK\_2

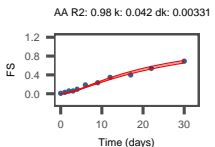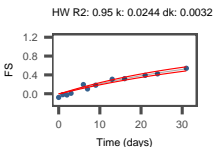

NDUF4 – ITVVEALTLNHHK\_3

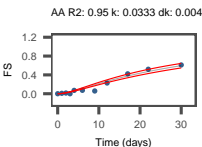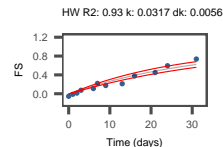

NDUS1 – LVNQVELADLPVPPQLTIK\_3

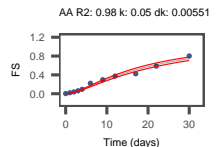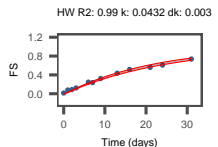

NDUB7 – HEQHDWYCEHLDYVK\_4

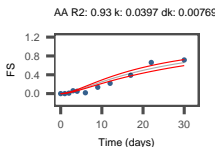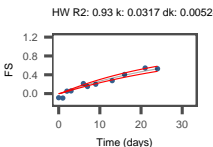

NDUS1 – DDGAAILVAVSNMVQK\_3

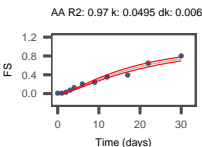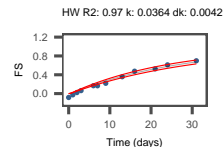

NDUS1 – MCLVEIEK\_2

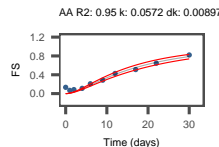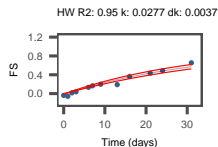

NDUB9 – AMYPDYFSK\_2

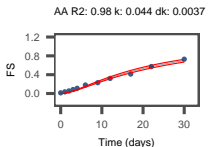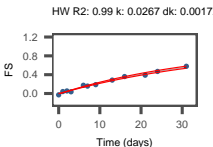

NDUS1 – GNDMQVGTYIEK\_2

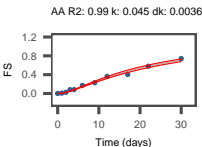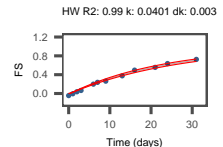

NDUS1 – MFMSELSGNVIDICPVGALTSK\_2

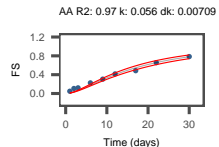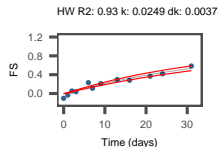

NDUB9 – VPEWCLDYWHPSEK\_3

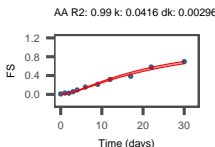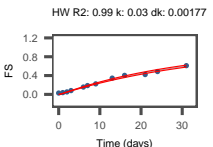

NDUS1 – IASQVAALDLGYPGVEAIR\_3

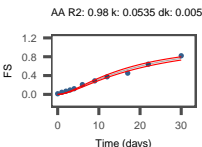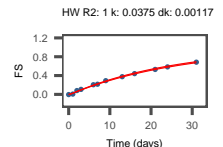

NDUS1 – MHEDINEEWISDK\_3

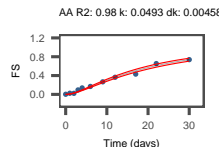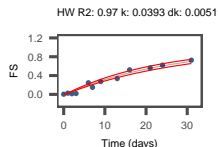

NDUBA – TPASPQTSLPNPITYLTK\_2

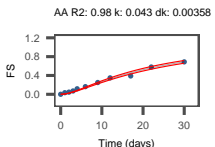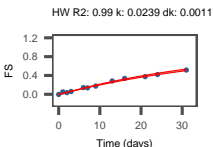

NDUS1 – KPMVVLGSSALQR\_3

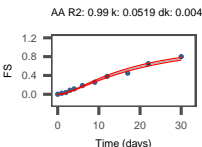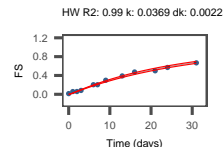

NDUS1 – YDHLGDSPK\_2

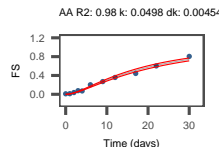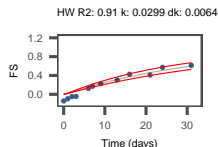

**NDUS2 – APGFAHLAGLDK\_2**

**NDUS4 – LDITTLGVPEEHIK\_3**

**NDUS7 – PPSPPSPLSLSQTSQSAVK\_2**

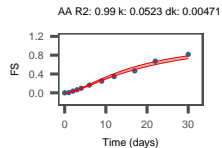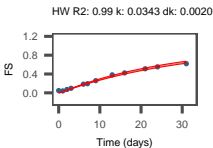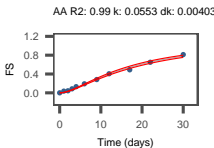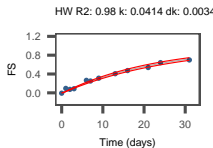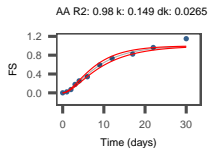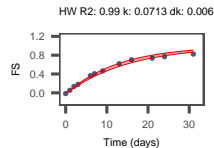

**NDUS2 – APGFAHLAGLDK\_3**

**NDUS6 – IICDGGGGALGHPK\_2**

**NDUS8 – EPATINYPFEK\_2**

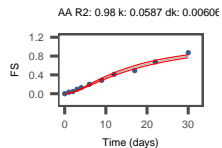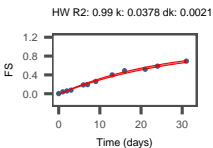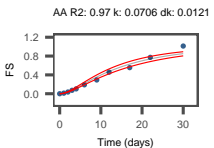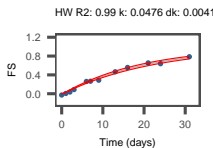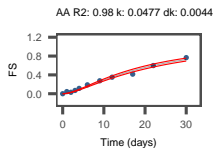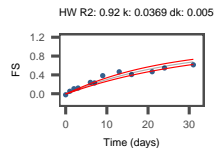

**NDUS2 – IIEQCLNK\_2**

**NDUS6 – IICDGGGGALGHPK\_3**

**NDUV1 – EAYEAGLIGK\_2**

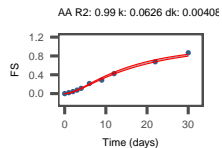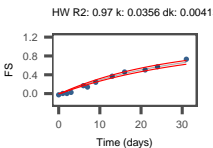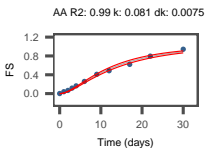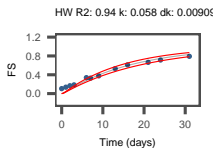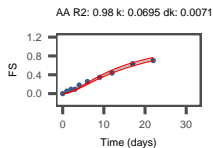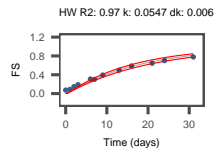

**NDUS2 – QWQPDIWEAQFSGAVMYPK\_2**

**NDUS6 – ITHTQVYDEK\_2**

**NDUV1 – EGVDWMNK\_2**

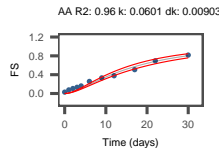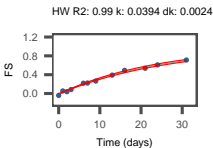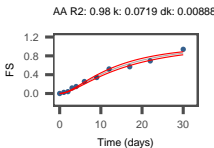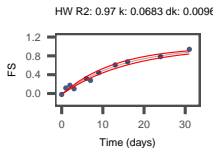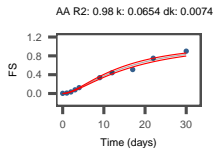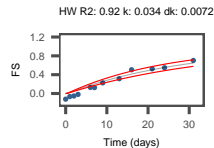

**NDUS2 – TSMESLIHFFK\_3**

**NDUS6 – ITHTQVYDEK\_3**

**NDUV1 – GAGAYICGEETALIESIEGK\_2**

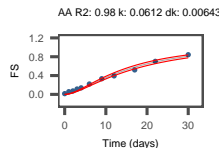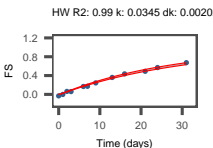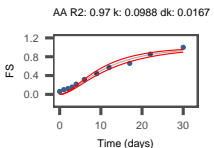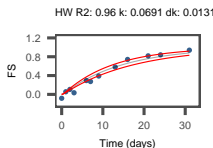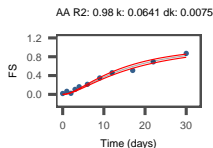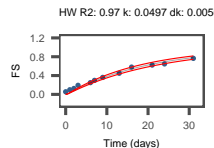

**NDUS3 – KFDLNSPWEAFPAYR\_3**

**NDUS6 – TGTCGYCLQFK\_2**

**NDUV1 – GAGAYICGEETALIESIEGK\_3**

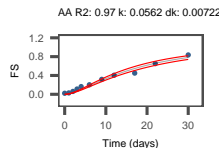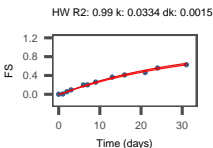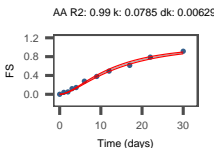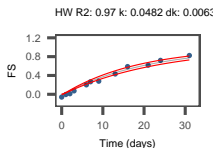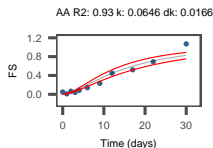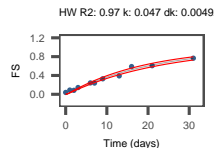

NDUV1 - GGAGFTGLK\_2

AA R2: 0.99 k: 0.066 dk: 0.00688

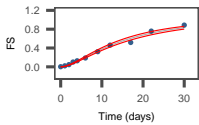

HW R2: 0.99 k: 0.0378 dk: 0.0018

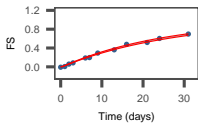

NDUV2 - FCCEPAGGLTSLTEPPK\_2

AA R2: 0.95 k: 0.0459 dk: 0.00842

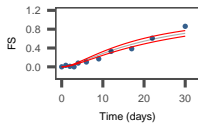

HW R2: 0.98 k: 0.0393 dk: 0.0033

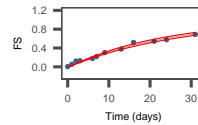

NNTM - EFIEAEMK\_2

AA R2: 0.99 k: 0.0362 dk: 0.00162

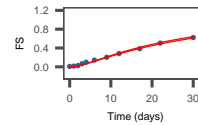

HW R2: 0.97 k: 0.0234 dk: 0.0022

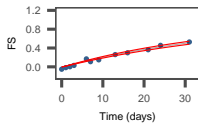

NDUV1 - GPDWILGEMK\_2

AA R2: 0.98 k: 0.073 dk: 0.00915

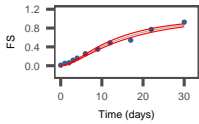

HW R2: 0.93 k: 0.0421 dk: 0.0078

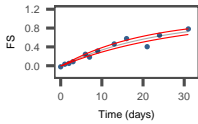

NDUV3 - EPEPTDTTYK\_2

AA R2: 0.99 k: 0.0379 dk: 0.0026

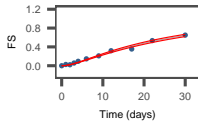

HW R2: 0.97 k: 0.0401 dk: 0.0042

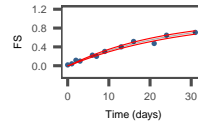

NNTM - EVDLISTALIPGK\_2

AA R2: 0.94 k: 0.0211 dk: 0.00272

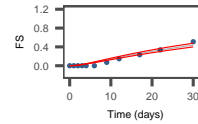

HW R2: 0.98 k: 0.0273 dk: 0.0019

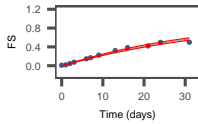

NDUV1 - HAGGVGTGWDDLAVIPGGSSTPLIK\_3

AA R2: 0.94 k: 0.085 dk: 0.0173

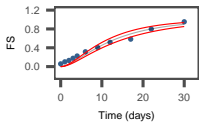

HW R2: 1 k: 0.0431 dk: 0.00194

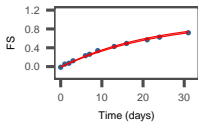

NID1 - EMDTFHPK\_3

AA R2: 0.94 k: 0.046 dk: 0.00781

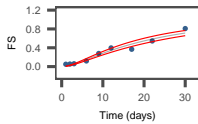

HW R2: 0.96 k: 0.0286 dk: 0.0035

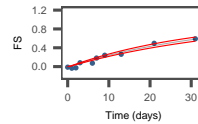

NNTM - EVLASDLVVK\_2

AA R2: 0.99 k: 0.0366 dk: 0.00196

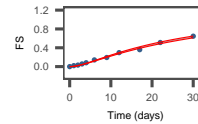

HW R2: 1 k: 0.0312 dk: 0.00113

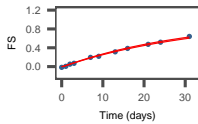

NDUV1 - YLVVNADEGEPGCK\_2

AA R2: 0.97 k: 0.07 dk: 0.0106

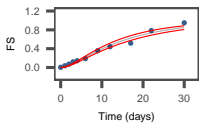

HW R2: 1 k: 0.0512 dk: 0.00257

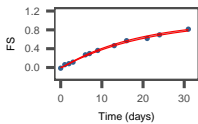

NID1 - VIIGLAFDVKDK\_2

AA R2: 0.91 k: 0.013 dk: 0.00174

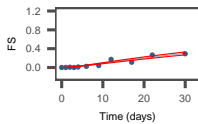

HW R2: 0.93 k: 0.0286 dk: 0.0040

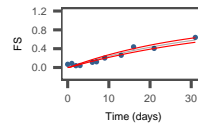

NNTM - KTTVLAMDQVPR\_3

AA R2: 0.98 k: 0.0352 dk: 0.0023

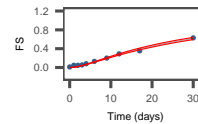

HW R2: 0.98 k: 0.0244 dk: 0.0017

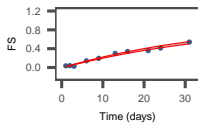

NDUV2 - DIEIIDLK\_2

AA R2: 0.99 k: 0.0539 dk: 0.00486

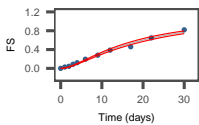

HW R2: 0.95 k: 0.062 dk: 0.00969

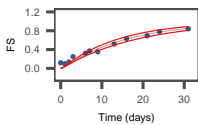

NIPS2 - LKENQEFVNR\_2

AA R2: 0.93 k: 0.0278 dk: 0.00443

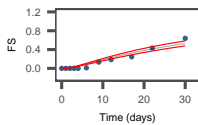

HW R2: 0.97 k: 0.0266 dk: 0.0024

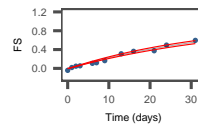

NNTM - MATQASTLYSNNITK\_2

AA R2: 0.96 k: 0.042 dk: 0.00518

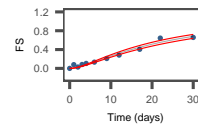

HW R2: 0.97 k: 0.0279 dk: 0.0022

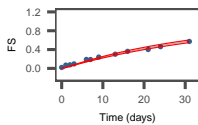

NDUV2 - DTPENPDTPDFDTPENYK\_2

AA R2: 0.95 k: 0.0449 dk: 0.00776

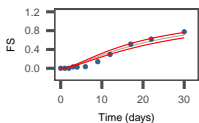

HW R2: 0.97 k: 0.0363 dk: 0.0043

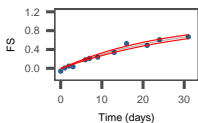

NNTM - AAGAIQGMK\_2

AA R2: 0.98 k: 0.0336 dk: 0.00244

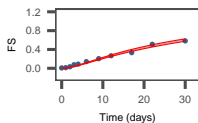

HW R2: 0.98 k: 0.0211 dk: 0.0017

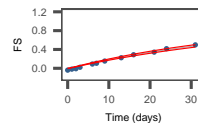

NNTM - QLTGVGPK\_2

AA R2: 0.99 k: 0.0341 dk: 0.0016

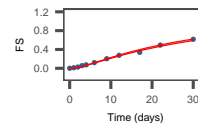

HW R2: 0.9 k: 0.0273 dk: 0.00401

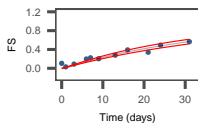

**NNTM – SLANVILGGYGTSTAGGK\_3**

**NU1M – YDQLMHLLWK\_3**

**OBSCN – DAALSDAGEVVFVSLGLTSK\_2**

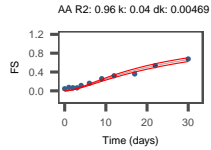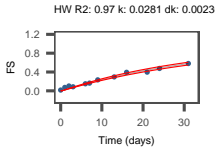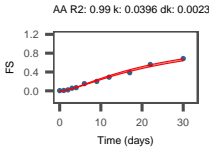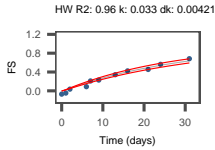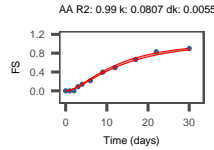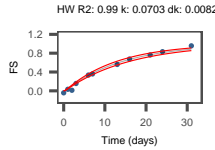

**NNTM – TVAELEAK\_2**

**NU4M – AHVEAPIAGSMILAAILLK\_3**

**OBSCN – DAALSDAGEVVFVSLGLTSK\_3**

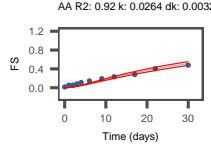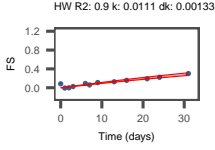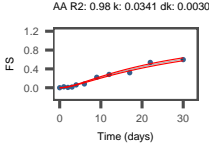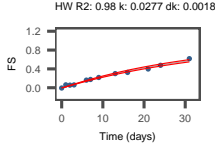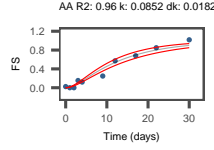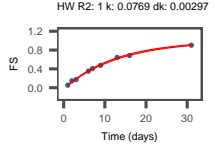

**NNTM – VALSPAGVALVK\_2**

**NU4M – ELTLMALHMIPLILLTTSK\_3**

**ODB2 – EDILSFLEK\_2**

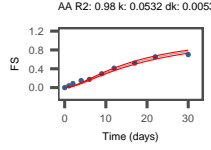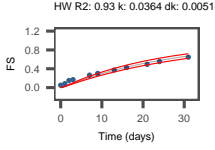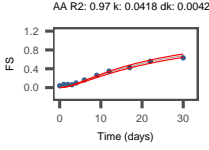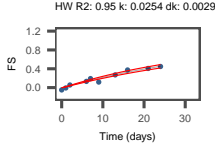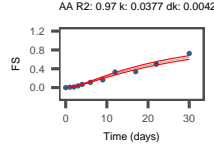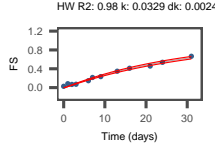

**NNTM – VIFPAPTPK\_2**

**NU5M – TSLTLDDLWLLEK\_2**

**ODB2 – PVILPPEVAIGALGAIK\_2**

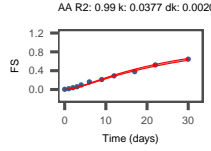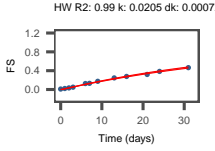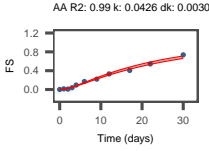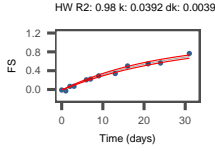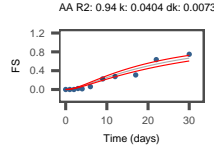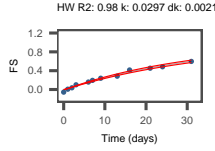

**NNTM – VTIAGQYDALSSMANISGYK\_2**

**NUDT8 – VWGLTAVITELTK\_2**

**ODB2 – PVILPPEVAIGALGAIK\_3**

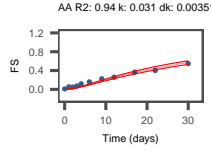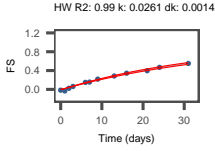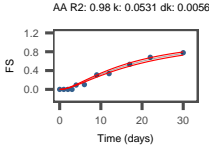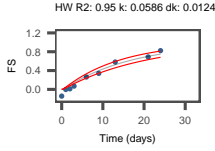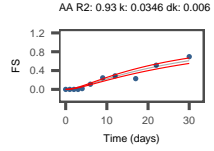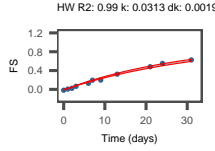

**NU1M – GPNIVGPYIGLQPFADAMK\_2**

**OAT – AFYNNVLGEYEEYITK\_2**

**ODDB – MNLFSITSALDNLAK\_3**

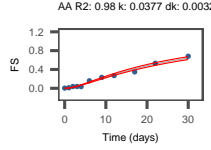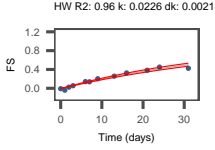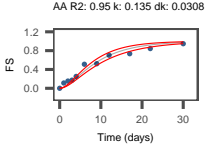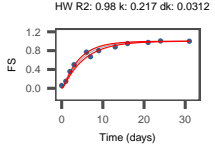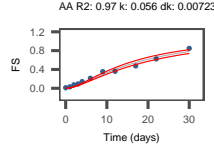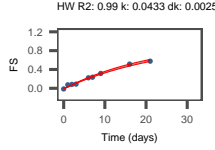

ODO1 - AEQFYCGDTEGK\_2

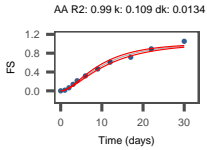

HW R2: 0.99 k: 0.0831 dk: 0.0063

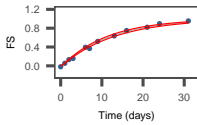

AA R2: 0.97 k: 0.0892 dk: 0.0134

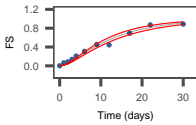

HW R2: 0.99 k: 0.0731 dk: 0.0057

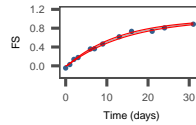

ODO1 - LSGTSSNYVEEMYCAWLENPK\_2

AA R2: 0.97 k: 0.136 dk: 0.0244

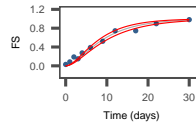

HW R2: 0.98 k: 0.0863 dk: 0.01

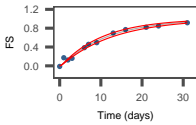

ODO1 - ELEQIFCQFDSK\_2

AA R2: 0.92 k: 0.204 dk: 0.0668

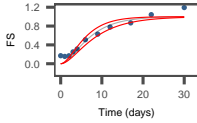

HW R2: 0.99 k: 0.0955 dk: 0.0071

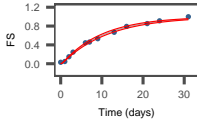

AA R2: 0.98 k: 0.119 dk: 0.019

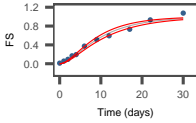

HW R2: 0.99 k: 0.0887 dk: 0.0093

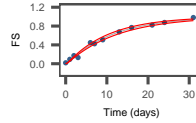

ODO1 - LSGTSSNYVEEMYCAWLENPK\_3

AA R2: 0.97 k: 0.159 dk: 0.0348

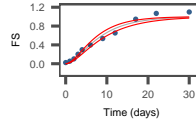

HW R2: 0.95 k: 0.0512 dk: 0.0078

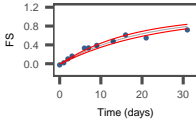

ODO1 - FGLEGCEVLIPALK\_2

AA R2: 0.98 k: 0.114 dk: 0.0145

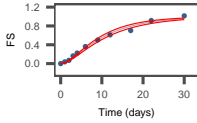

HW R2: 1 k: 0.0802 dk: 0.00488

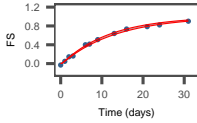

AA R2: 0.98 k: 0.0951 dk: 0.0103

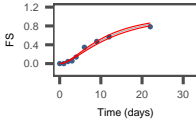

HW R2: 0.97 k: 0.0538 dk: 0.0070

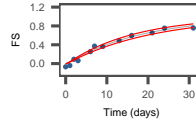

ODO1 - NQGYDYVKPR\_3

AA R2: 0.98 k: 0.115 dk: 0.0162

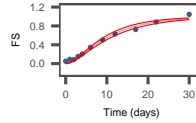

HW R2: 0.99 k: 0.0623 dk: 0.0038

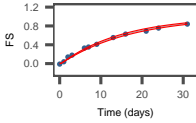

ODO1 - FLDTAFDLDAFK\_2

AA R2: 0.98 k: 0.142 dk: 0.025

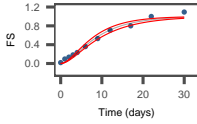

HW R2: 0.96 k: 0.14 dk: 0.0264

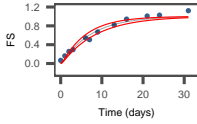

AA R2: 0.98 k: 0.108 dk: 0.0118

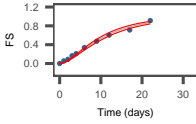

HW R2: 0.98 k: 0.0718 dk: 0.0071

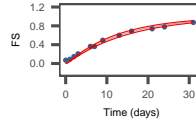

ODO1 - SSLATMAHAQSLVEAQPNDK\_3

AA R2: 0.97 k: 0.138 dk: 0.0267

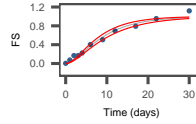

HW R2: 0.97 k: 0.0862 dk: 0.0121

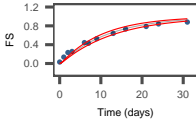

ODO1 - HHVLDHQNVDK\_3

AA R2: 0.98 k: 0.102 dk: 0.0142

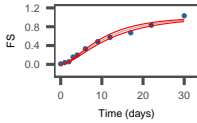

HW R2: 0.98 k: 0.0618 dk: 0.0076

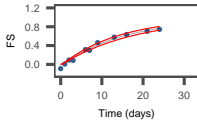

AA R2: 0.98 k: 0.106 dk: 0.0142

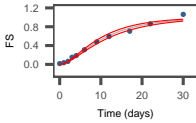

HW R2: 0.98 k: 0.0624 dk: 0.0071

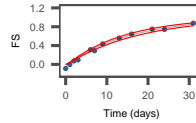

ODO1 - TVDWALAEYMAFGSLK\_3

AA R2: 0.98 k: 0.114 dk: 0.0164

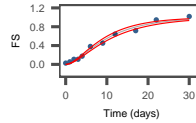

HW R2: 1 k: 0.0785 dk: 0.00365

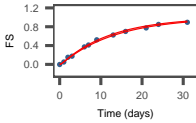

ODO1 - HHVLDHQNVDKR\_2

AA R2: 0.96 k: 0.0879 dk: 0.0204

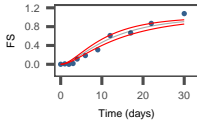

HW R2: 0.98 k: 0.0843 dk: 0.0093

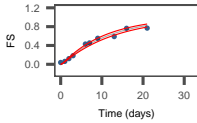

AA R2: 0.98 k: 0.123 dk: 0.0183

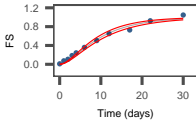

HW R2: 0.99 k: 0.102 dk: 0.00948

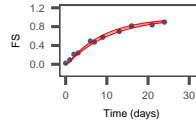

ODO1 - YAELLVSQGVVNQPEYEEIEISK\_2

AA R2: 0.97 k: 0.0732 dk: 0.0118

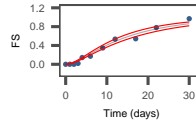

HW R2: 0.96 k: 0.0854 dk: 0.0186

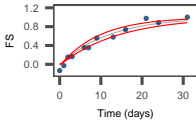

ODO1 – YPNAELAWQEEHK\_3

ODPB – AAWYGHCPGLK\_3

ODPX – STVPHAYATADCDLGAVLK\_3

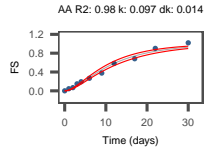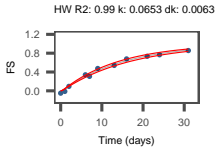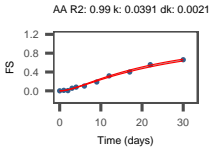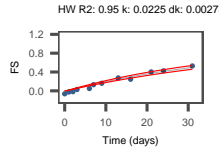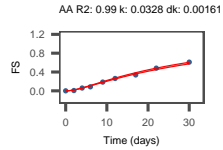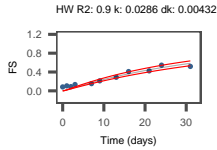

ODP2 – DVPLGAPLCIIVEK\_2

ODPB – DIIFAVK\_2

ODPX – VLMPSLSPTEMQGNIVK\_2

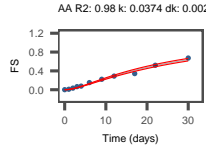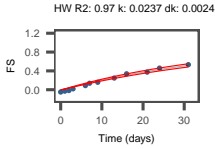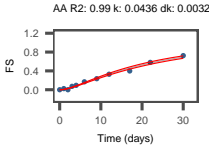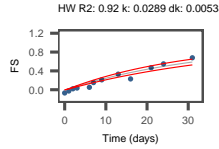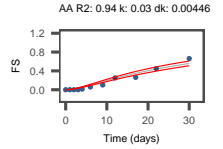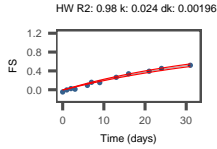

ODP2 – GLETIASDVVSLAK\_3

ODPB – EAINQGMDEELERDEK\_3

OLA1 – IPAFNLVVDIAGLVK\_2

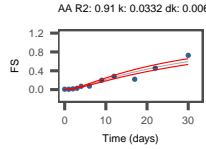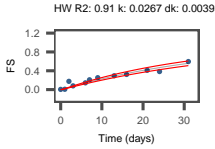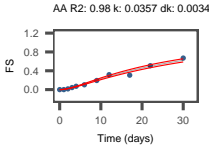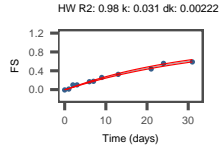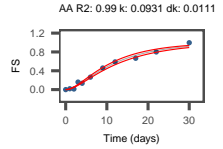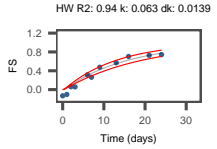

ODP2 – LQPHEFGGFTTISNLGMFGIK\_3

ODPB – FSMQAIQVNSAAK\_3

OPA1 – NEILDEVISLSQVTPK\_3

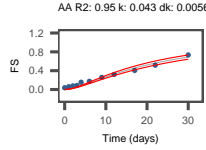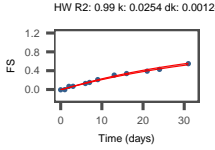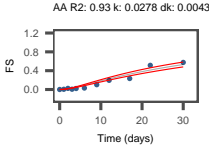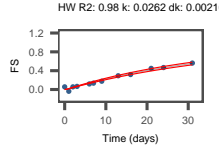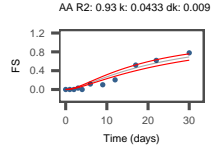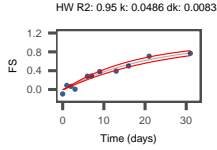

ODP2 – VVDGAVGAQWLAEFK\_3

ODPB – VLLGEEVAQYDGAYK\_3

OPA1 – VTLSEGGPHVALFK\_4

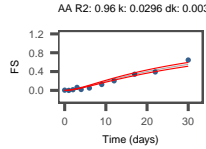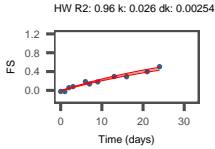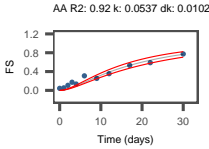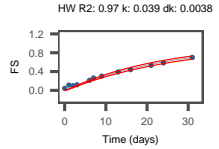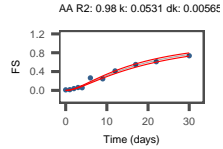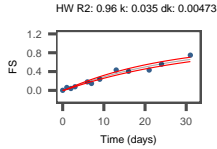

ODP2 – YLEKPIITMLL\_2

ODPB – VLEDNSVPQVK\_2

OTUB1 – LELSVLYK\_2

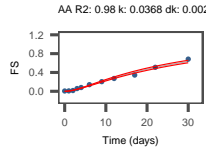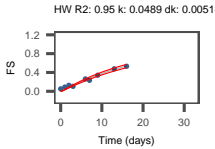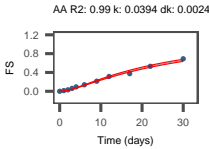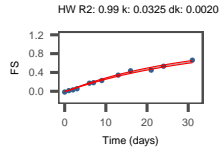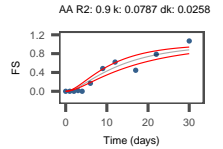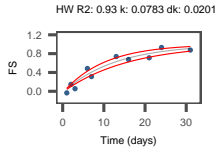





**PFKAM - CNEYTTDFIFNLNLYSEEGK\_2**

**PGAM1 - YADLTEDQLPSCESLK\_2**

**PGBM - SFLPLPTIK\_2**

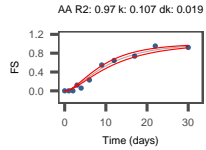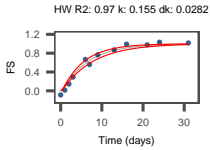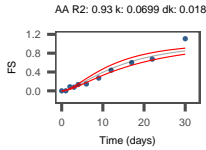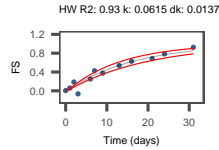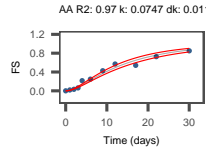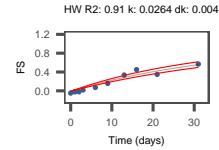

**PFKAM - GQIEEAGWSYVGGWTGGGSK\_2**

**PGAM2 - FCGWFDALSEK\_2**

**PGBM - SIEYSPQLEDASAK\_2**

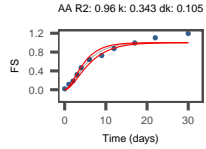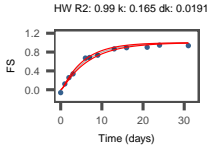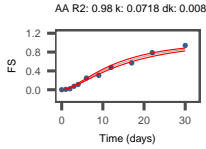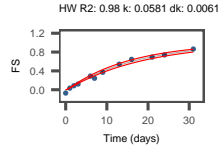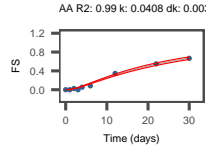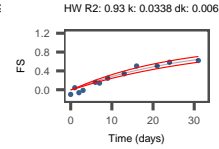

**PFKAM - GQIEEAGWSYVGGWTGGGSK\_3**

**PGAM2 - HNYTTSISK\_2**

**PGK1 - ALESPERPFILAILGGAK\_2**

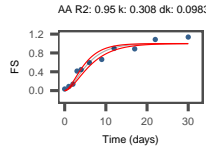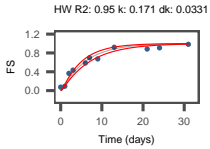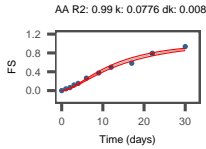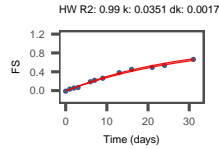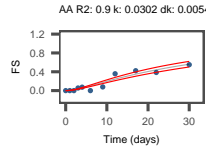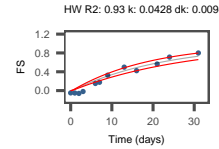

**PFKAM - LNIIIVAEGAIDK\_2**

**PGAM2 - SFDTPPPMDEK\_2**

**PGK1 - ALESPERPFILAILGGAK\_3**

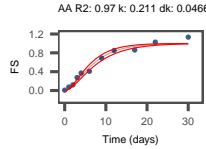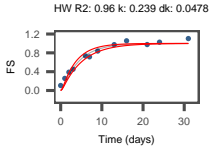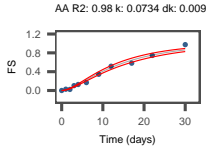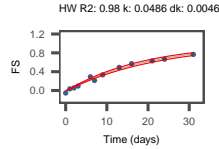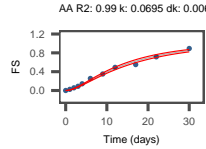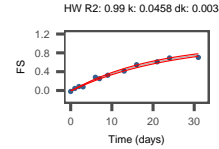

**PFKAM - VLVVHDGFEGLAK\_2**

**PGBM - FLVHDAFWALPK\_3**

**PGK1 - FCLDNGAK\_2**

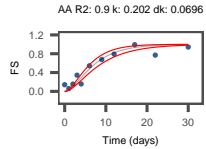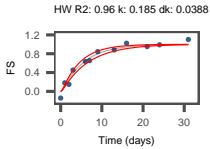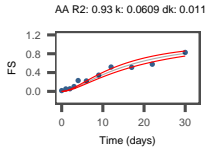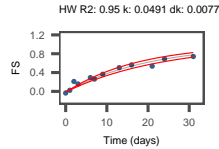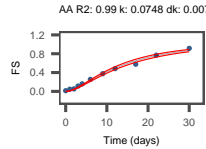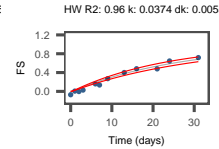

**PFKAM - VLVVHDGFEGLAK\_3**

**PGBM - IPGDQIVSVVFIK\_2**

**PGK1 - GCTIHGGDDTATCCAK\_2**

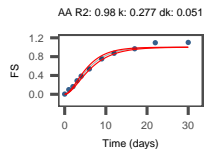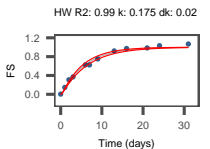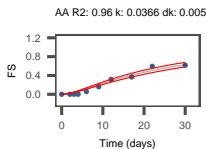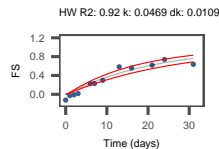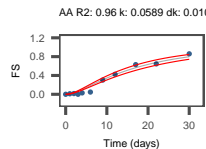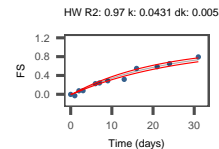

**PGK1 – SVVLMShLGRPDGVPMPDK\_3**

**PHP14 – WAeyHADIYDK\_3**

**PP1A(Non-Unique) – EIfLSQPILLEAPLK\_2**

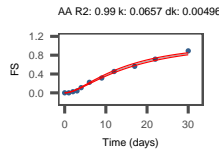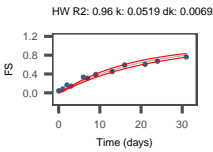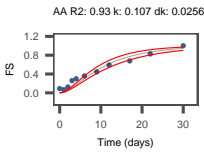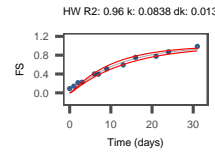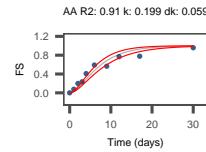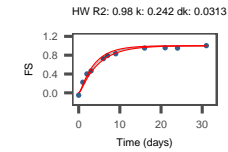

**PGM1 – ADNFeySDPVDGSISK\_2**

**PIMT – LILPVGAGGNQMLQYDK\_2**

**PPIA(Non-Unique) – FEDENfLK\_2**

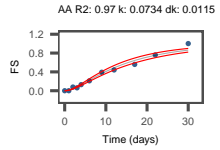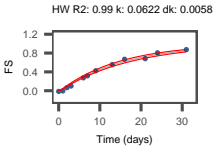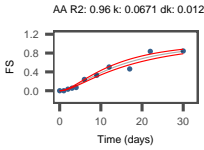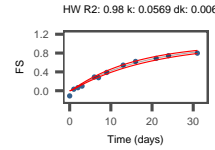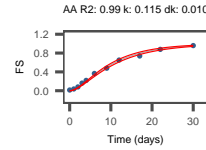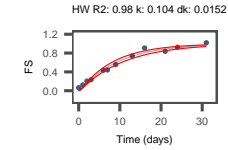

**PGM1 – YDYEEVEAEgANK\_2**

**PLAK – LLNQPnQWPLVK\_2**

**PPIA(Non-Unique) – VSFELFADK\_2**

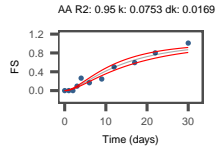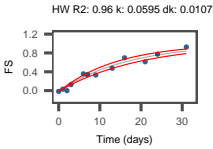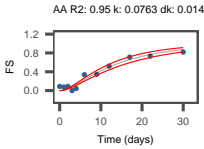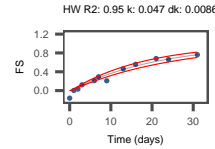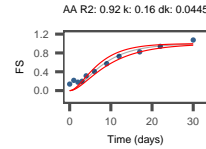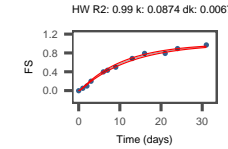

**PHB – VLPSITTEILK\_2**

**PLEC – DPYtGEQISLFQAMK\_2**

**PRDX1(Non-Unique) – ATAVMPDgQFK\_2**

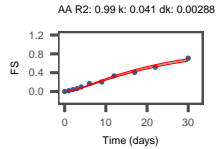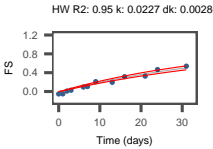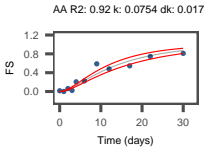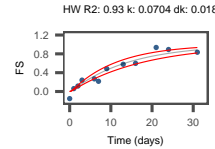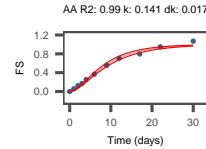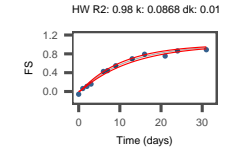

**PHB2 – IVQAEGEEAAEK\_2**

**PLIN4 – DTVTtGLTgAVNVAK\_2**

**PRDX1(Non-Unique) – TIAQDYGLVK\_2**

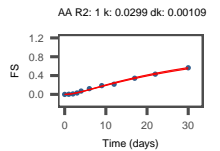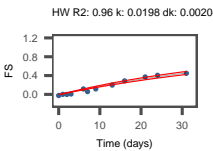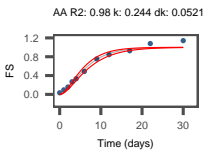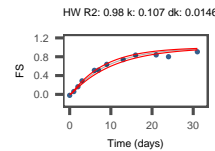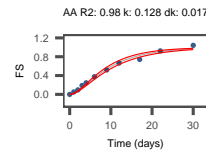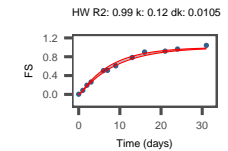

**PHB2 – VLPSIVNEVK\_2**

**PLST – ISFNefYIVQEVK\_2**

**PRDX2 – EGGLGnPLnLLADVTK\_2**

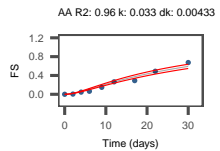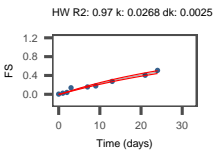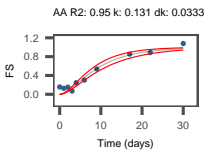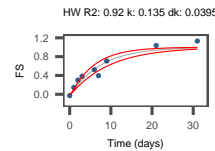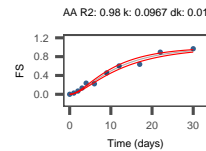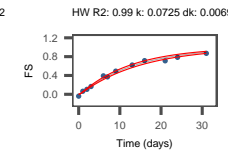

PRDX2 – GLFIIDAK\_2

PRDX5 – VNLAELEFK\_2

PSA3 – SNFGYNIPLK\_2

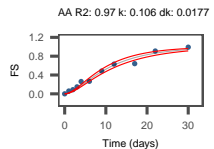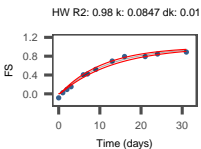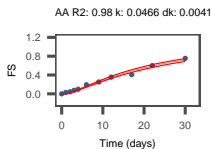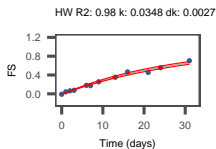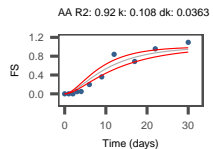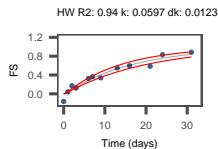

PRDX2 – SLSQNYGLVK\_2

PRDX6 – DLAILLGMLDPVEK\_2

PSA4 – SALALAVK\_2

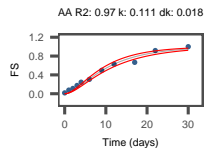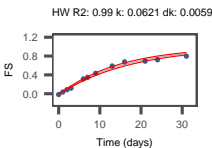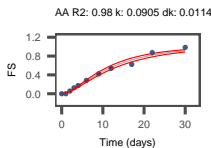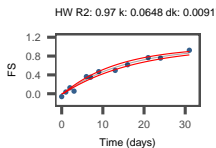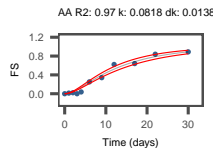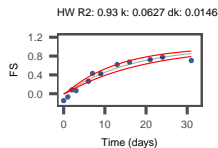

PRDX3 – ELSLDDFK\_2

PRDX6 – LPFPIIDK\_2

PSD11 – EASIDILHSVK\_3

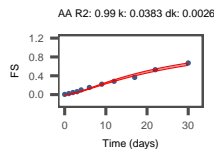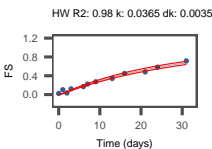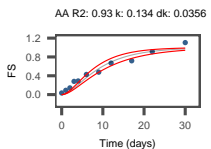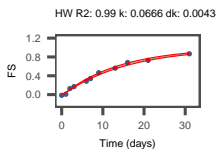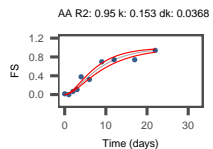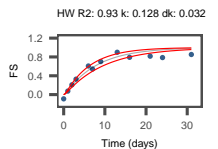

PRDX3 – PAVTQHAPYFK\_3

PRDX6 – VVFIFGPK\_2

PSD12 – LQEVITLLSLEK\_2

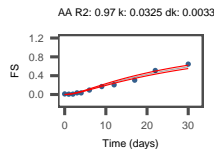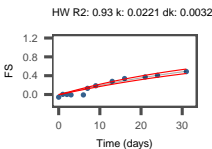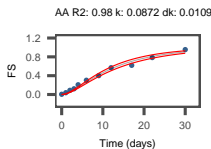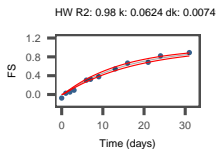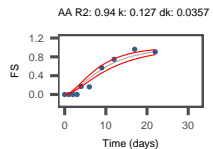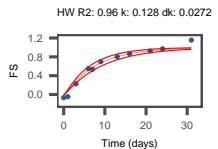

PRDX3 – TPAVTQHAPYFK\_3

PROF1 – TFSITPAEVLGVK\_2

PSMD2 – EDVLTLLPLVMGDSK\_2

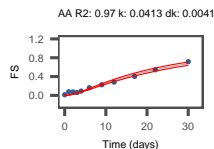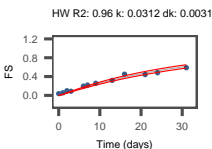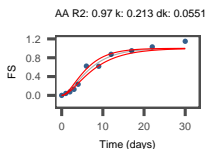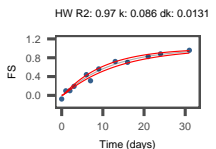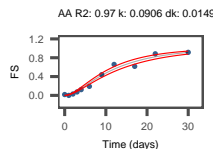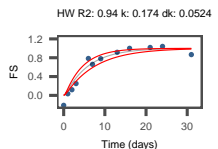

PRDX4(Non-Unique) – GLFIIDK\_2

PSA2 – LVQIEYALAAVGAPSVGK\_3

PSMD8 – LVLLEFLPTTGK\_2

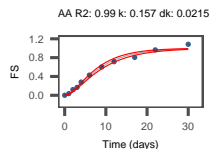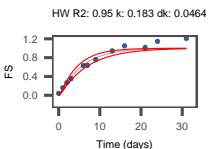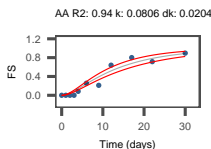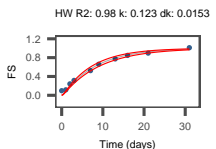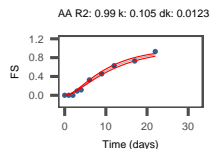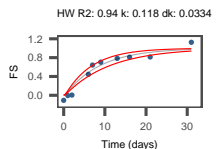



QCR1 – VVELLADIVQNSLSDESIQEK\_2

QCR7 – DDTLHETEDVK\_2

RB11B(Non-Unique) – DHADSNIVMLVGNK\_3

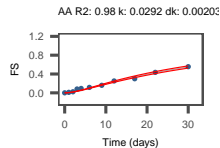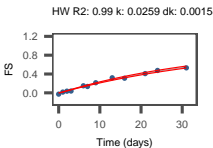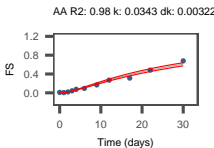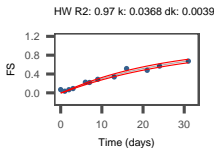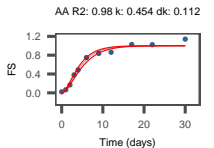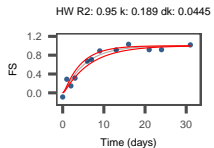

QCR10 – LILDWPYINGK\_2

QCR7 – DDTLHETEDVK\_3

REEP5 – HESQVDSVK\_2

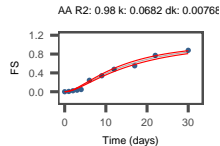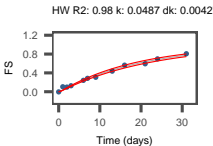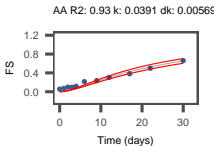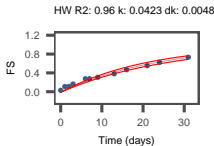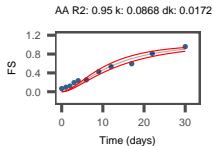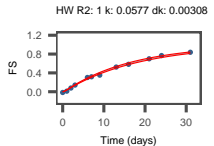

QCR2 – GGLGLAGAK\_2

QCR7 – YEEDKFYLEPY\_2

RL15 – FFEVLIDPFHK\_3

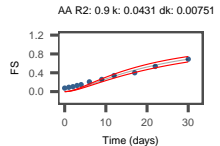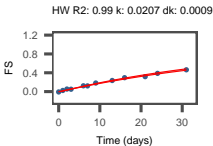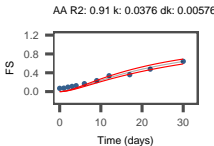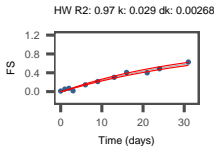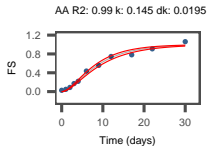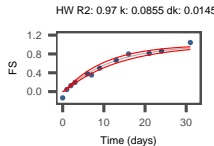

QCR2 – IENLHDVAYK\_3

RAB1B – EFADSLGVPFLETSAK\_2

RL23 – ISLGLPVGAVINCADNTGAK\_2

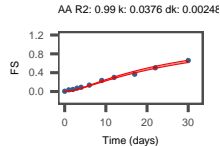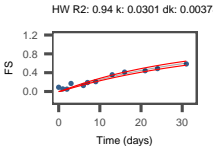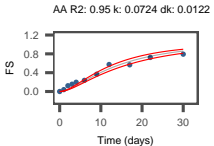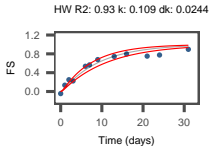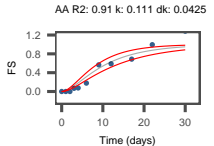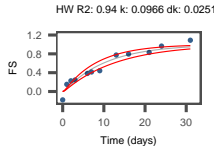

QCR2 – SVLQHLGAGPHIK\_4

RACK1 – IWDLEGK\_2

RL4 – NIPGITLLNVSK\_2

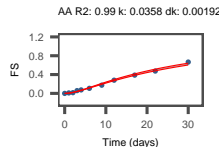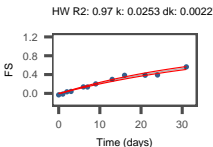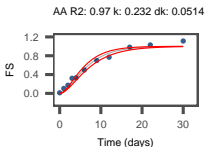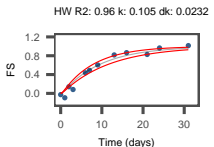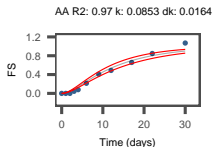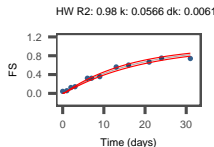

QCR2 – TSAAPGGVLPQDLEFTK\_2

RAP1A(Non-Unique) – SALTQVQGVGIFVEK\_2

RL7A – AGNVTVTLLVENK\_2

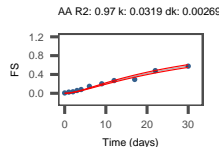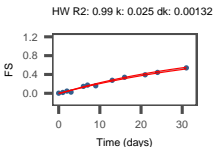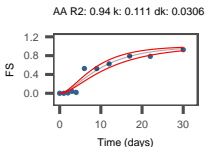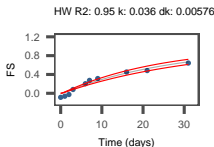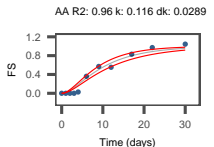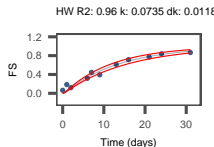



**RTN2 – VADLLYWK\_2**

**RYR2 – VQESISDFYWYSGK\_2**

**SAP – EVVDSYLPVLDMIK\_2**

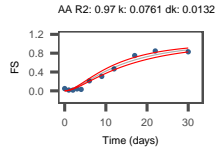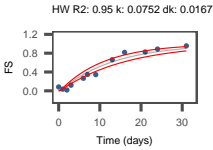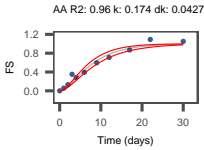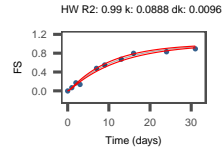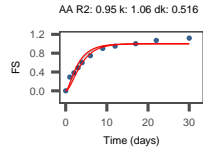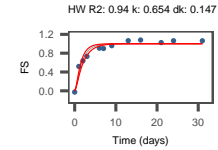

**RYR2 – AFADGFK\_2**

**RYR2 – VVLPLIDQYFK\_2**

**SAP – TCEWIHDSLSASCK\_3**

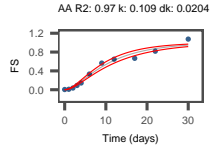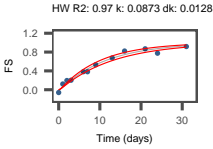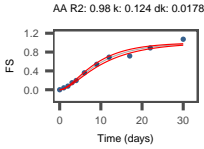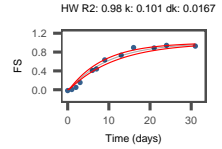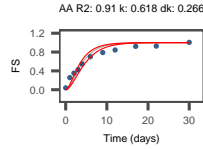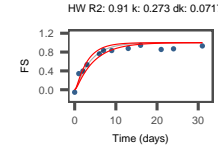

**RYR2 – DLHAMAEMMAENYHNIWAK\_3**

**S10A1 – DLLQTELSGFLDVQK\_2**

**SBP1 – GTWEKPGDAAPMGYDFWYQPR\_3**

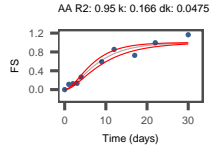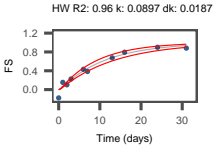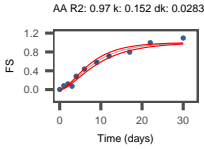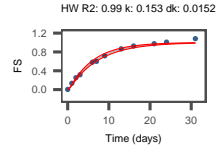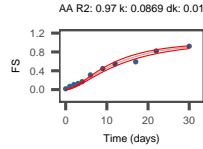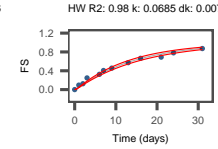

**RYR2 – LFWGIFDALSQK\_2**

**S10A1 – DLLQTELSGFLDVQK\_3**

**SBP1(Non-Unique) – HNMVSTEWAAPNVFK\_3**

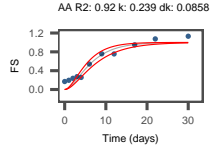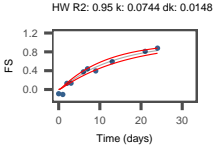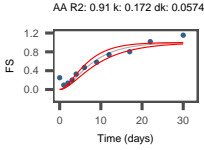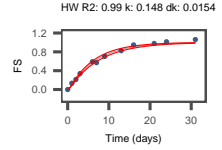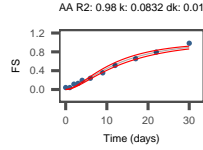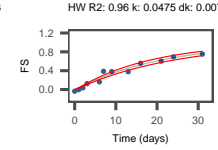

**RYR2 – SVAGGLPGAGFYGPK\_2**

**S10A1 – ELDENGDEVDK\_2**

**SBP1 – NAEGTWSVEK\_2**

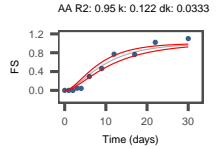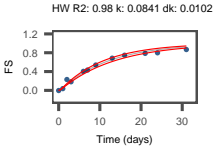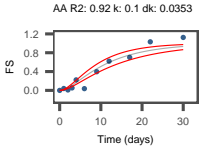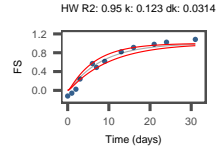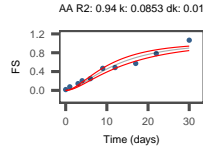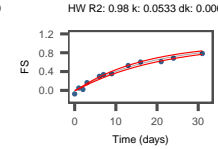

**RYR2 – VLGIANVLFHLEQK\_3**

**SAP – EEILAALEK\_2**

**SCOT1 – AGGAGVPAYFTSTGYTLVQEGGSPIK\_2**

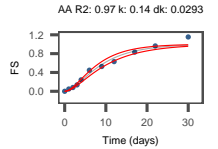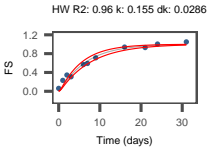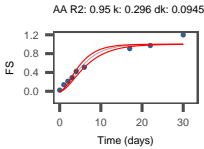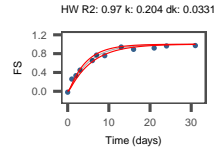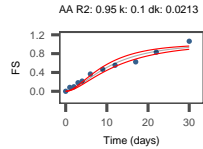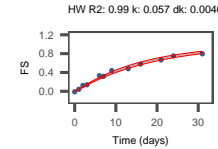



SCOT1 – AGGAGVPAFYTSTGYTLVQEGGSPK\_3

AA R2: 0.97 k: 0.0836 dk: 0.0135

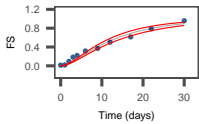

HW R2: 0.99 k: 0.0533 dk: 0.0033

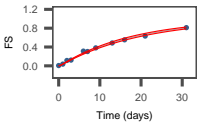

AA R2: 0.99 k: 0.0883 dk: 0.00962

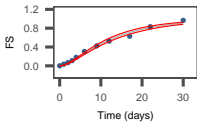

HW R2: 0.99 k: 0.0516 dk: 0.0035

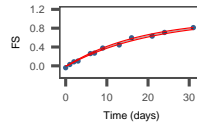

SDHA – ACALSIAESCRPGDK\_3

AA R2: 0.97 k: 0.0582 dk: 0.00752

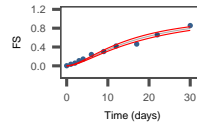

HW R2: 1 k: 0.0365 dk: 0.00147

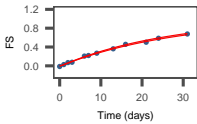

SCOT1 – DGSVAIASKPR\_2

AA R2: 0.99 k: 0.0792 dk: 0.00874

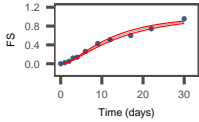

HW R2: 0.99 k: 0.0411 dk: 0.0028

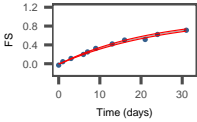

SCOT1 – YGDLANWMPGK\_2

AA R2: 0.98 k: 0.0909 dk: 0.0131

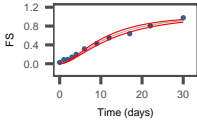

HW R2: 0.99 k: 0.0498 dk: 0.0033

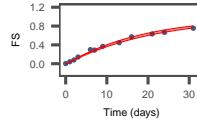

SDHA – AFGGQSLK\_2

AA R2: 0.99 k: 0.049 dk: 0.00353

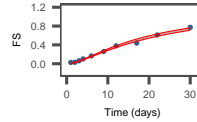

HW R2: 0.99 k: 0.0355 dk: 0.0015

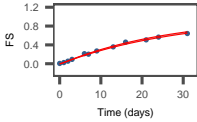

SCOT1 – DGSVAIASKPR\_3

AA R2: 0.98 k: 0.0903 dk: 0.0108

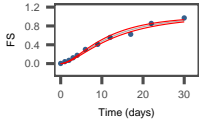

HW R2: 0.9 k: 0.0566 dk: 0.0111

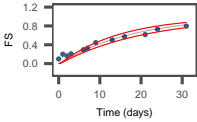

SCP2 – ADCTITMADSDLLALMTGK\_2

AA R2: 0.96 k: 0.316 dk: 0.0898

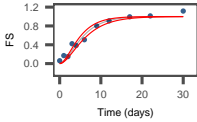

HW R2: 0.98 k: 0.221 dk: 0.0305

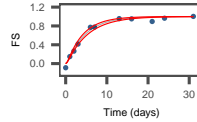

SDHA – ISQLYGLDK\_2

AA R2: 0.98 k: 0.0583 dk: 0.00671

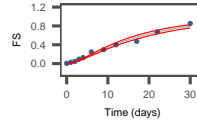

HW R2: 0.99 k: 0.0488 dk: 0.0032

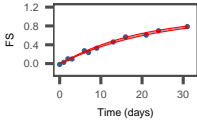

SCOT1 – FYTDPVEAVK\_2

AA R2: 0.91 k: 0.177 dk: 0.0779

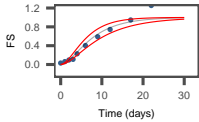

HW R2: 0.99 k: 0.0526 dk: 0.0050

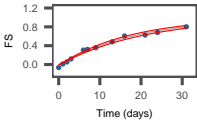

SCP2 – ADCTITMADSDLLALMTGK\_3

AA R2: 0.9 k: 0.254 dk: 0.0909

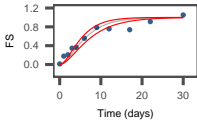

HW R2: 0.98 k: 0.214 dk: 0.0276

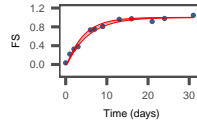

SDHA – KPFGHEWR\_3

AA R2: 0.99 k: 0.0619 dk: 0.00526

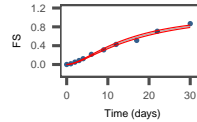

HW R2: 0.99 k: 0.031 dk: 0.0017

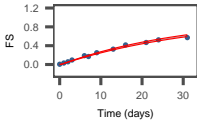

SCOT1 – GGHVNLTLGAMQVSK\_3

AA R2: 0.94 k: 0.105 dk: 0.0246

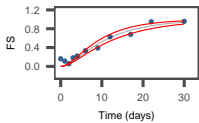

HW R2: 0.99 k: 0.047 dk: 0.00404

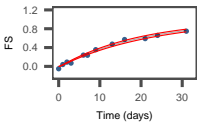

SCP2 – IGGIFAFK\_2

AA R2: 0.98 k: 0.285 dk: 0.0524

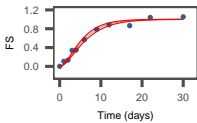

HW R2: 0.93 k: 0.114 dk: 0.0278

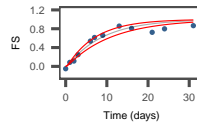

SDHA – VGSVLQEGCEK\_2

AA R2: 0.99 k: 0.053 dk: 0.00466

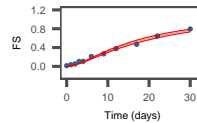

HW R2: 0.99 k: 0.0448 dk: 0.0023

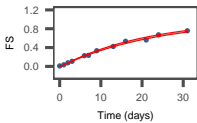

SCOT1 – GMGGAMDLVSSK\_2

AA R2: 0.95 k: 0.107 dk: 0.0223

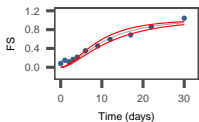

HW R2: 0.98 k: 0.0537 dk: 0.0050

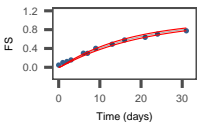

SCP2 – LQNLQLQPGK\_2

AA R2: 0.96 k: 0.263 dk: 0.0678

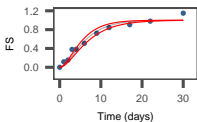

HW R2: 0.98 k: 0.184 dk: 0.024

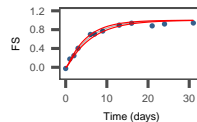

SDHA – WHFYDTVK\_3

AA R2: 0.99 k: 0.0618 dk: 0.00604

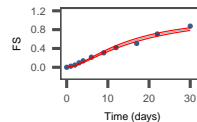

HW R2: 0.98 k: 0.06 dk: 0.00634

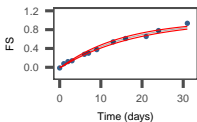





SUCB1 - IFDLQDWSQEDERDK\_3

SUCB2 - VVGLAQQMIGYNLATK\_2

TBA1B(Non-Unique) - VGINYQPPTVPVGGDLAK\_2

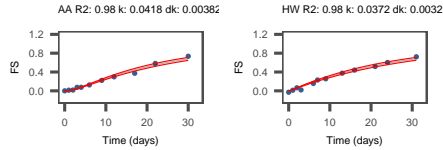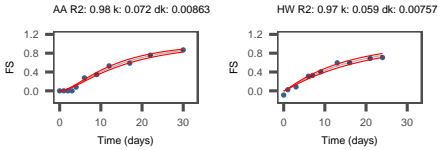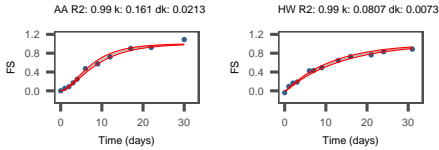

SUCB1 - MGFPSNVDSAAMNIK\_3

TALDO - LVLFLGAEILK\_2

TBA4A - DVNAAIAIAIK\_2

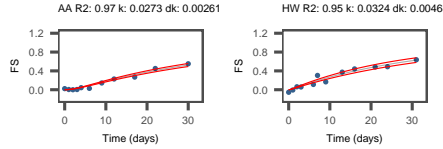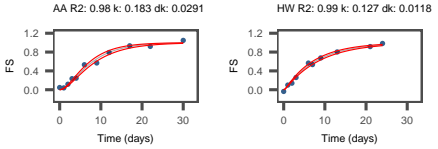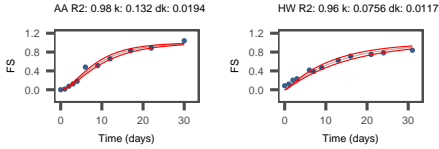

SUCB1 - SFQGPVLIGSAQGGVNIEDVAENPEAIVK\_3

TBA1B(Non-Unique) - EDMAALEK\_2

TBB2A - INVYNEAAGNK\_2

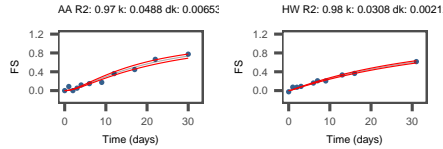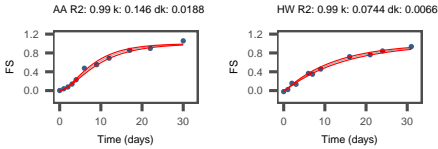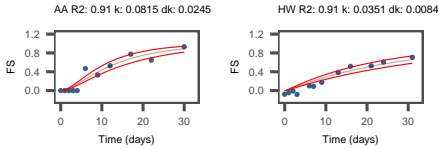

SUCB1 - SSDEAYAIAK\_2

TBA1B(Non-Unique) - FDLMYAK\_2

TBB4B(Non-Unique) - EIVHLQAGCGNQIGAK\_3

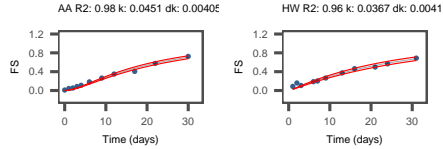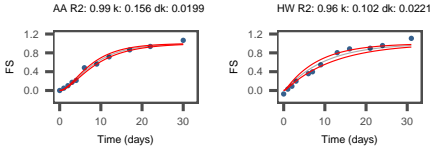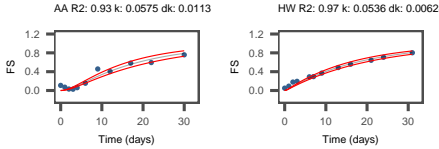

SUCB1 - YDATMVEINPMVEDSDGK\_2

TBA1B(Non-Unique) - SIQFVWCPTGFK\_2

TCPA - WIGLDLVHGK\_3

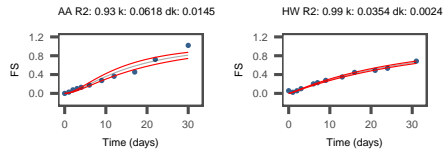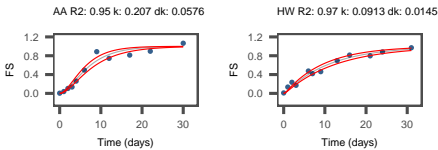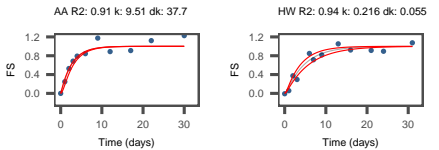

SUCB2 - LEGTNVQEAQNILK\_2

TBA1B(Non-Unique) - TIGGGDDSFNTFFSETGAGK\_2

TCPB - LSSFIGAIGDLVK\_2

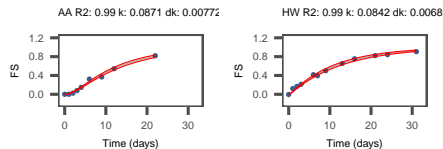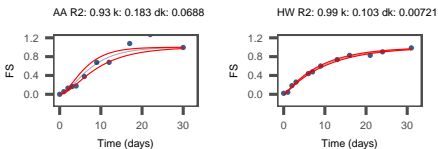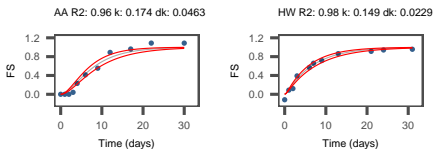

TCPD - DALSLALHFLNK\_3

THIL - ASKPTLNEVVIVSAIR\_3

THIL - QATLGAGLPSTPCTTVNK\_2

AA R2: 0.97 k: 0.212 dk: 0.0568

HW R2: 0.92 k: 0.201 dk: 0.0668

AA R2: 0.99 k: 0.0516 dk: 0.00434

HW R2: 1 k: 0.0312 dk: 0.000894

AA R2: 0.98 k: 0.0441 dk: 0.00386

HW R2: 1 k: 0.0285 dk: 0.000932

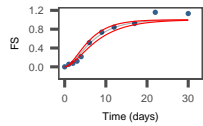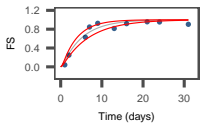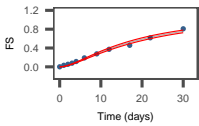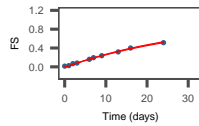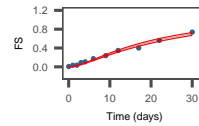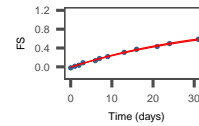

TCPQ - AIAGTGANVIVTGGK\_2

THIL - EDIAMWEVNEAFSVVLANIK\_3

THIL - QATLGAGLPSTPCTTVNK\_3

AA R2: 0.98 k: 0.192 dk: 0.0414

HW R2: 0.97 k: 0.164 dk: 0.031

AA R2: 0.94 k: 0.0238 dk: 0.00303

HW R2: 0.95 k: 0.033 dk: 0.00393

AA R2: 0.98 k: 0.046 dk: 0.00522

HW R2: 0.98 k: 0.0276 dk: 0.0026

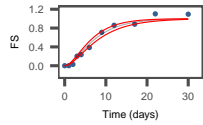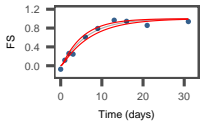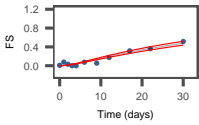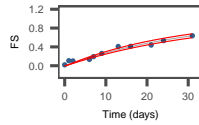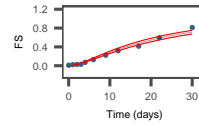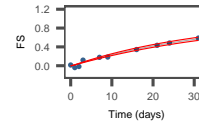

TELT - EAFWAEWK\_2

THIL - IAAFADAAVDPIDFLPAYAVPK\_2

THIL - TPIGSFLGLASQPATK\_2

AA R2: 0.93 k: 50.7 dk: 895

HW R2: 0.94 k: 1.65 dk: 0.446

AA R2: 0.95 k: 0.0549 dk: 0.00875

HW R2: 0.99 k: 0.0315 dk: 0.0017

AA R2: 0.99 k: 0.0443 dk: 0.00275

HW R2: 0.98 k: 0.0216 dk: 0.0014

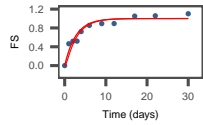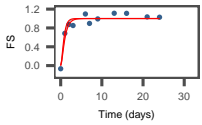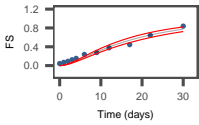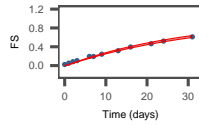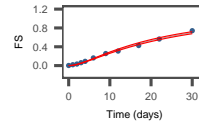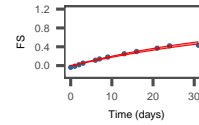

TERA - LEILQHTK\_3

THIL - LEDLIVK\_2

THIL - TPIGSFLGLASQPATK\_3

AA R2: 0.98 k: 0.338 dk: 0.073

HW R2: 0.99 k: 0.178 dk: 0.0184

AA R2: 0.99 k: 0.0528 dk: 0.00417

HW R2: 0.98 k: 0.0419 dk: 0.0040

AA R2: 0.99 k: 0.0484 dk: 0.00375

HW R2: 0.99 k: 0.0275 dk: 0.0015

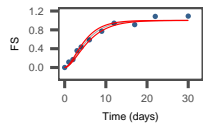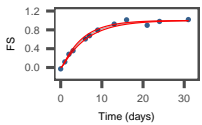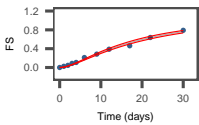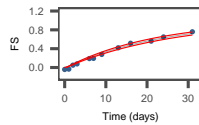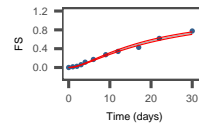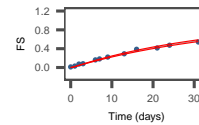

TERA - NAPAIFIDELDAIAPK\_2

THIL - LGTAAIQGAIK\_2

THIM - ALDLPSK\_2

AA R2: 0.98 k: 0.31 dk: 0.0599

HW R2: 0.99 k: 0.169 dk: 0.014

AA R2: 0.92 k: 0.0448 dk: 0.00813

HW R2: 0.99 k: 0.0338 dk: 0.0014

AA R2: 0.99 k: 0.0384 dk: 0.00291

HW R2: 0.98 k: 0.0303 dk: 0.0023

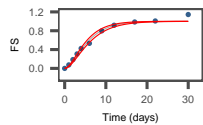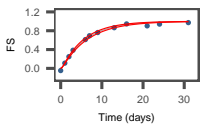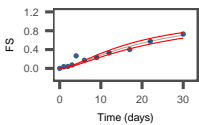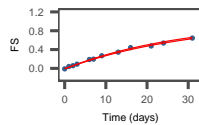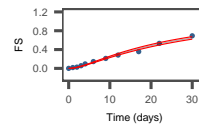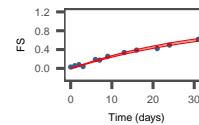

THIL - ASKPTLNEVVIVSAIR\_2

THIL - MLEIDPQK\_2

THIM - DGTVTAGNASVSDGAGAVIAISEDVK\_2

AA R2: 0.92 k: 0.032 dk: 0.00583

HW R2: 0.96 k: 0.0288 dk: 0.0035

AA R2: 0.99 k: 0.0433 dk: 0.00286

HW R2: 0.97 k: 0.0296 dk: 0.0029

AA R2: 0.97 k: 0.0354 dk: 0.00393

HW R2: 0.97 k: 0.0264 dk: 0.0023

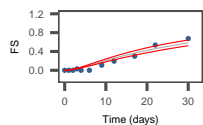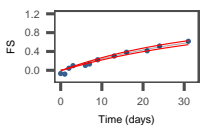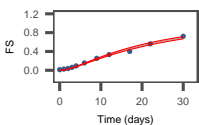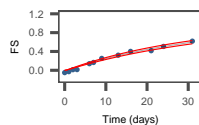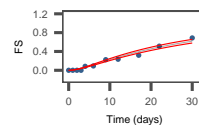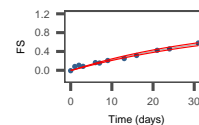

THIM - GVFI5AAK\_2

THIO - EAFQEAALAAAGDK\_2

TITIN - ADTLKPDQR\_3

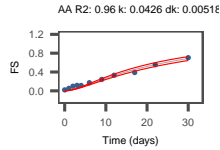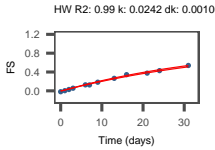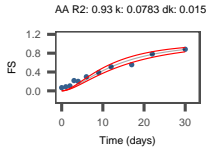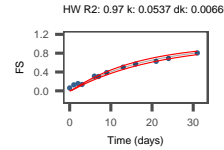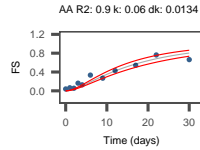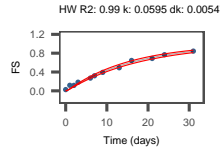

THIM - LCGSGFQSVISGQCEISK\_2

TIM50 - VLLDLSAFLK\_2

TITIN - AGDSIVLSAISILGK\_2

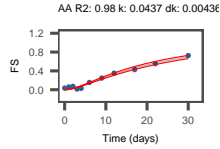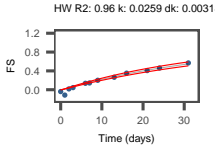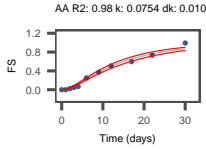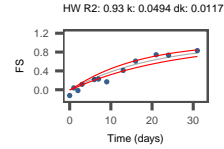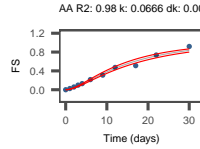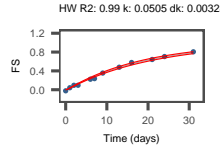

THIM - LCGSGFQSVISGQCEISK\_3

TITIN - AAEDEWTTCTPPSGLQ GK\_2

TITIN - AGDSIVLSAISILGK\_3

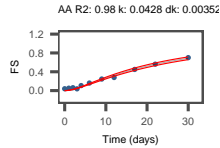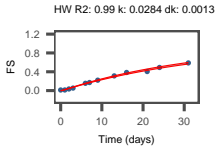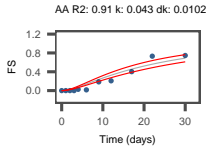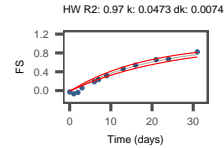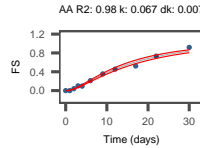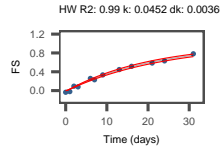

THIM - LEDTLWAGLTDQHVK\_2

TITIN - AADPIDPPGPAK\_2

TITIN - AGEDVQLLIPFK\_2

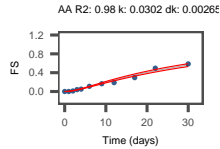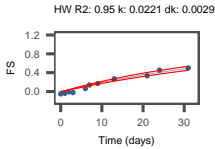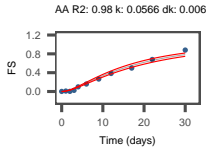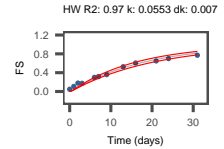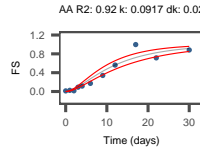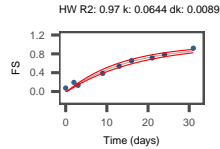

THIM - LPMGTAENLAAK\_2

TITIN - AASFECVSHFNVPMSWLK\_3

TITIN - AGSPPSPKTEYVTAR\_3

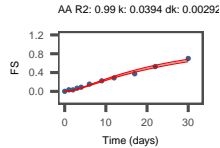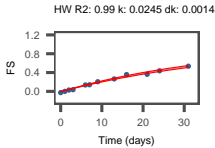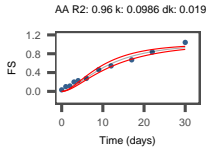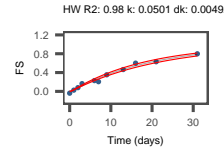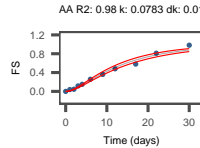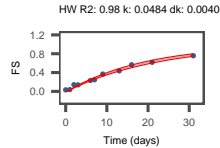

THIM - PQTTLEQLQK\_2

TITIN - ADSCEFTVTLQK\_2

TITIN - AINDTESYLLIVDK\_2

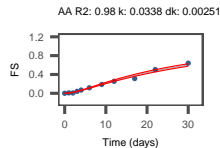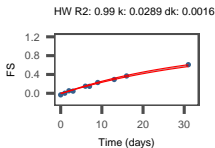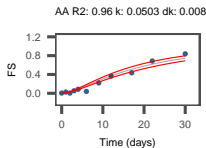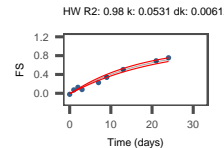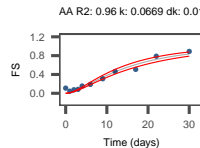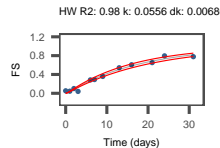

TITIN - ALDPFTTSPPTSLEITSVK\_2

AA R2: 0.96 k: 0.0524 dk: 0.00872

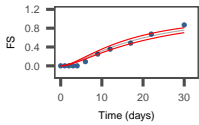

HW R2: 0.96 k: 0.0543 dk: 0.0092

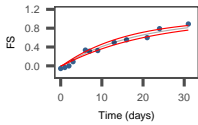

AA R2: 0.97 k: 0.0793 dk: 0.0125

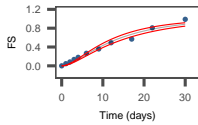

HW R2: 0.99 k: 0.0561 dk: 0.0040

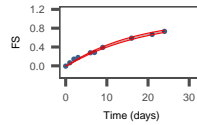

TITIN - AYATITNCTK\_2

AA R2: 0.95 k: 0.036 dk: 0.00468

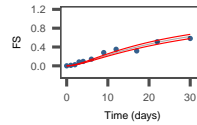

HW R2: 0.96 k: 0.0354 dk: 0.0049

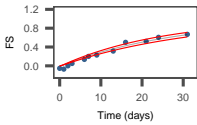

TITIN - ALVPGNIFK\_2

AA R2: 0.98 k: 0.0741 dk: 0.00826

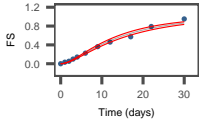

HW R2: 0.93 k: 0.0294 dk: 0.0052

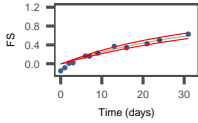

TITIN - ATSTAEVLVQGEEVPAK\_2

AA R2: 0.93 k: 0.04 dk: 0.00803

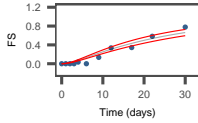

HW R2: 0.95 k: 0.0539 dk: 0.0112

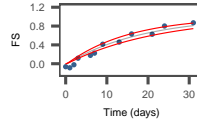

TITIN - AYSTVATNCHK\_3

AA R2: 0.97 k: 0.0719 dk: 0.0107

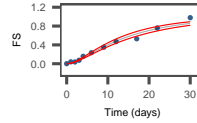

HW R2: 0.99 k: 0.043 dk: 0.00376

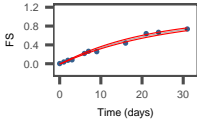

TITIN - AMIATSEHTELVIK\_3

AA R2: 0.98 k: 0.0522 dk: 0.00626

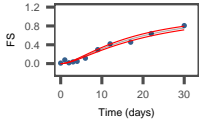

HW R2: 0.94 k: 0.0449 dk: 0.0079

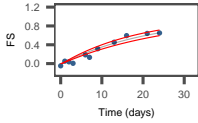

TITIN - ATSYTITSLIENQEYK\_2

AA R2: 0.98 k: 0.0909 dk: 0.012

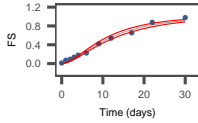

HW R2: 0.97 k: 0.0505 dk: 0.0066

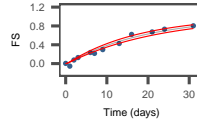

TITIN - CREPVNPPSAPSVKK\_3

AA R2: 0.92 k: 0.0411 dk: 0.00857

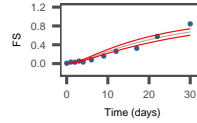

HW R2: 0.91 k: 0.0569 dk: 0.0122

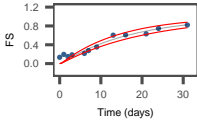

TITIN - APPIEPAPTPIAAPVTAPVVGK\_2

AA R2: 0.93 k: 0.055 dk: 0.0133

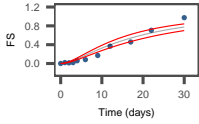

HW R2: 0.96 k: 0.0526 dk: 0.0084

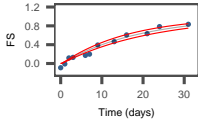

TITIN - AVFVNK\_2

AA R2: 0.98 k: 0.0769 dk: 0.0112

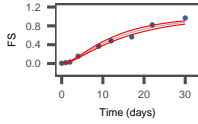

HW R2: 0.91 k: 0.0558 dk: 0.0134

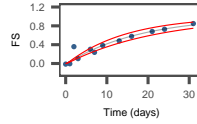

TITIN - CTLAWSPPLQDGGSDISHYVVEK\_3

AA R2: 0.96 k: 0.0634 dk: 0.0106

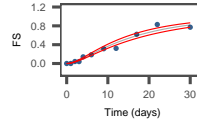

HW R2: 0.95 k: 0.0586 dk: 0.0089

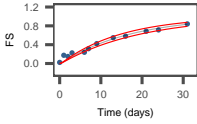

TITIN - AQIDVTPVGSK\_2

AA R2: 0.98 k: 0.0612 dk: 0.00741

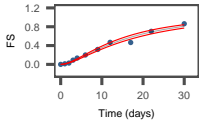

HW R2: 0.98 k: 0.0472 dk: 0.0052

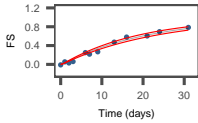

TITIN - AVYAQDPLYPGPPAFPK\_2

AA R2: 0.9 k: 0.0495 dk: 0.0138

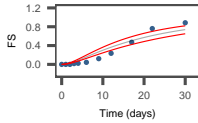

HW R2: 0.99 k: 0.0494 dk: 0.0042

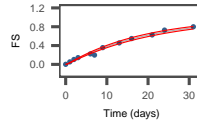

TITIN - DAHRPGWLVPSEVTRPTFK\_4

AA R2: 0.95 k: 0.0679 dk: 0.0122

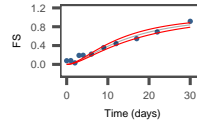

HW R2: 0.98 k: 0.0471 dk: 0.0049

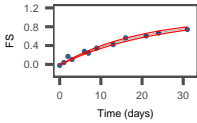

TITIN - ATGNPNPDIVWLK\_2

AA R2: 0.96 k: 0.114 dk: 0.027

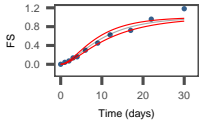

HW R2: 0.98 k: 0.047 dk: 0.00468

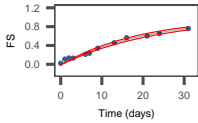

TITIN - AVYAQDPLYPGPPAFPK\_3

AA R2: 0.95 k: 0.0621 dk: 0.0118

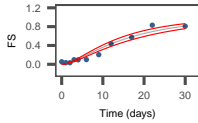

HW R2: 0.97 k: 0.0805 dk: 0.0117

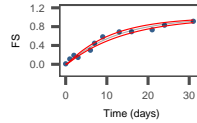

TITIN - DENVPPTVEFGPEYFDGLVIK\_3

AA R2: 0.92 k: 0.0504 dk: 0.0114

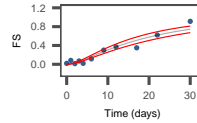

HW R2: 0.95 k: 0.042 dk: 0.00761

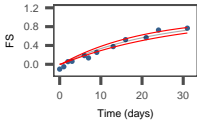





TITIN - ETQAVNWTK\_2

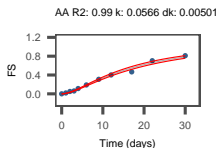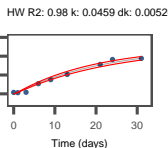

TITIN - FQCQVSGDLK\_2

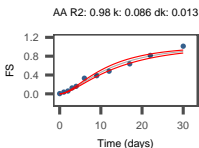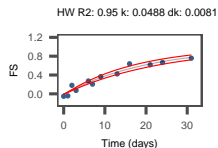

TITIN - GTAFTCDIAK\_2

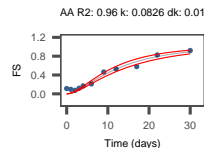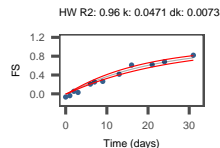

TITIN - ETSRPNWAQVSATVPITSCVEK\_3

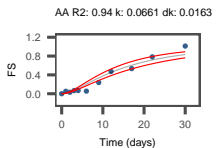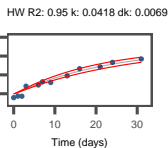

TITIN - FQDEGEYTLASNEYGK\_2

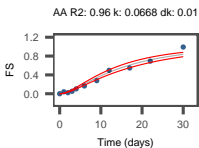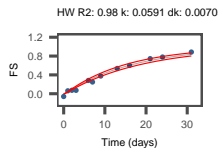

TITIN - GVPFPLTWFK\_2

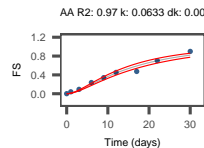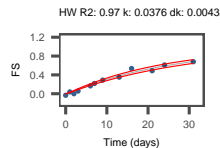

TITIN - EVETALSTIAVATAK\_2

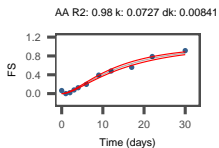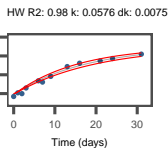

TITIN - GDSCEVTGK\_2

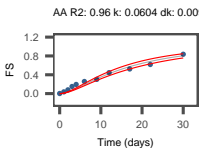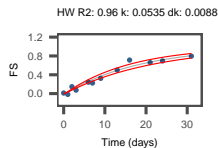

TITIN - GWQTVDTVK\_2

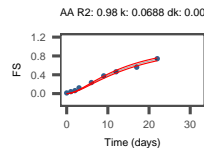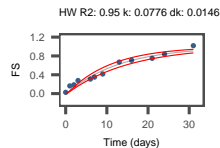

TITIN - FISPLEDQTVK\_2

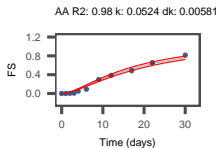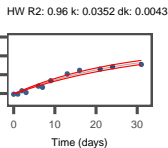

TITIN - GLLQAFELK\_2

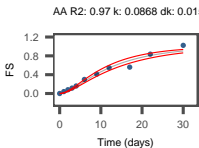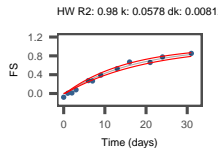

TITIN - GYVIELK\_2

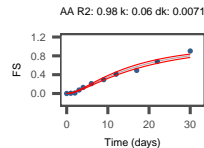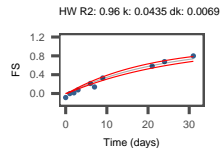

TITIN - FNTEITAENLTK\_2

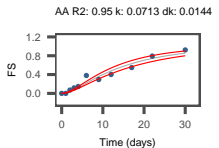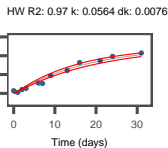

TITIN - GNYQSSAAPHALLSSVAEETLQLEK\_3

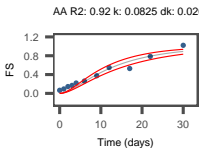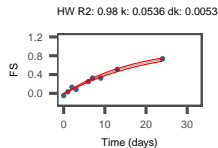

TITIN - HDSVSLTWDPK\_3

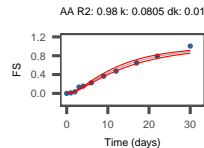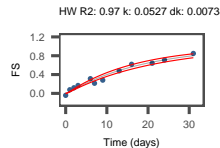

TITIN - PPFVDPSEPK\_2

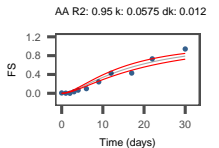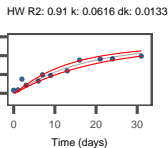

TITIN - GSMLVSWTPPLDNGSGPITGYWLEK\_2

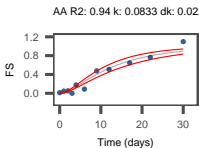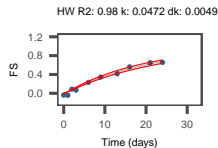

TITIN - HLVDTISEEGDVTHLTSSISNAK\_3

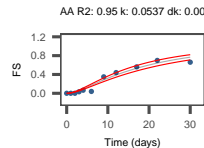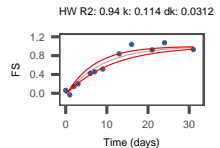

**TITIN – IDVFIGRPPPAVTHKH\_4**

**TITIN – INADIAGRPLPVISWAK\_3**

**TITIN – KTPSPIEAER\_3**

AA R2: 0.95 k: 0.0668 dk: 0.0133

HW R2: 0.97 k: 0.0445 dk: 0.0047

AA R2: 0.97 k: 0.0601 dk: 0.00795

HW R2: 0.98 k: 0.041 dk: 0.00447

AA R2: 0.91 k: 0.0787 dk: 0.0166

HW R2: 0.97 k: 0.0455 dk: 0.0054

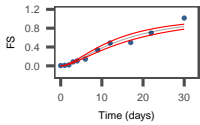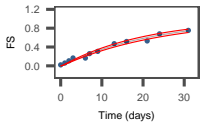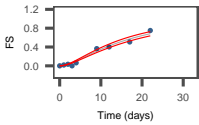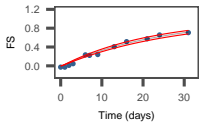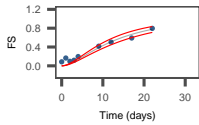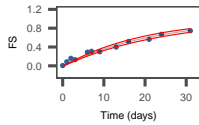

**TITIN – IDWFKDEADVLEDDR\_3**

**TITIN – ITIPFKPER\_3**

**TITIN – LAWALIEDNCEALSYTAK\_2**

AA R2: 0.97 k: 0.0537 dk: 0.0077

HW R2: 0.98 k: 0.0708 dk: 0.0091

AA R2: 0.99 k: 0.0754 dk: 0.00745

HW R2: 0.95 k: 0.0321 dk: 0.0047

AA R2: 0.92 k: 0.0498 dk: 0.0124

HW R2: 0.98 k: 0.057 dk: 0.00622

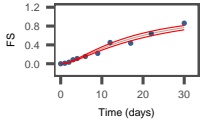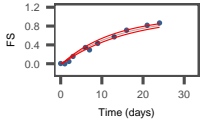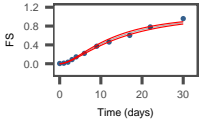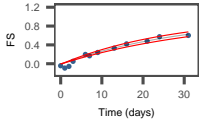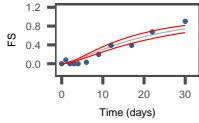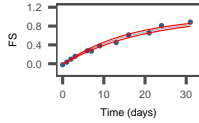

**TITIN – IEPLEVALGHLAK\_3**

**TITIN – ITNYVIEK\_2**

**TITIN – LAWTNVATEVQVTK\_2**

AA R2: 0.99 k: 0.0763 dk: 0.00775

HW R2: 0.97 k: 0.0712 dk: 0.0093

AA R2: 0.98 k: 0.0709 dk: 0.00836

HW R2: 0.98 k: 0.0529 dk: 0.0066

AA R2: 0.97 k: 0.0732 dk: 0.0112

HW R2: 0.96 k: 0.0684 dk: 0.0111

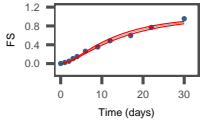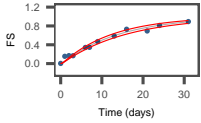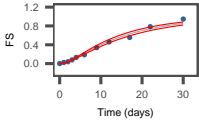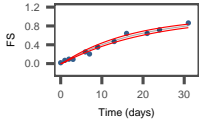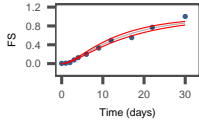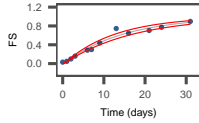

**TITIN – IHEEDKIDVQGR\_3**

**TITIN – IVGYWVEK\_2**

**TITIN – LAWTVVASEVVTNSLK\_3**

AA R2: 0.94 k: 0.045 dk: 0.00797

HW R2: 0.95 k: 0.0711 dk: 0.0139

AA R2: 0.99 k: 0.0677 dk: 0.00554

HW R2: 0.97 k: 0.0521 dk: 0.0066

AA R2: 0.98 k: 0.0754 dk: 0.0101

HW R2: 0.99 k: 0.0603 dk: 0.0045

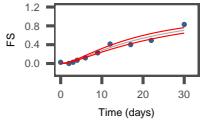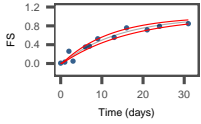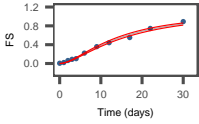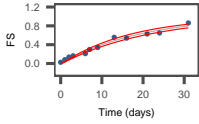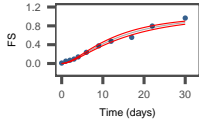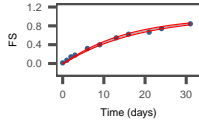

**TITIN – IHNLSESDCGEYVEVSGEGGTSK\_3**

**TITIN – KAEAVATVVAVDQAR\_3**

**TITIN – LDQAGEVLYQACNAITAILTVK\_3**

AA R2: 0.95 k: 0.0767 dk: 0.0174

HW R2: 0.94 k: 0.0532 dk: 0.0112

AA R2: 0.97 k: 0.0809 dk: 0.0139

HW R2: 0.98 k: 0.059 dk: 0.00665

AA R2: 0.96 k: 0.0971 dk: 0.0178

HW R2: 0.99 k: 0.0517 dk: 0.0031

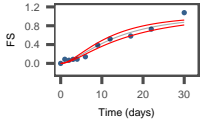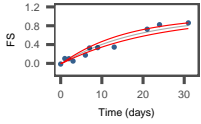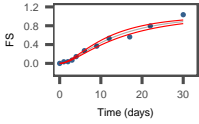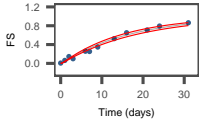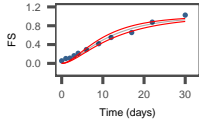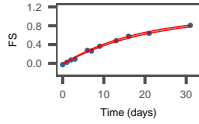

**TITIN – IMAENAAGISAPSPFYK\_2**

**TITIN – KTPSPIEAER\_2**

**TITIN – LDQTGGVDFQAANVK\_2**

AA R2: 0.97 k: 0.06 dk: 0.00904

HW R2: 0.99 k: 0.0466 dk: 0.0040

AA R2: 0.96 k: 0.0521 dk: 0.00842

HW R2: 0.98 k: 0.0411 dk: 0.0044

AA R2: 0.97 k: 0.0673 dk: 0.00945

HW R2: 0.98 k: 0.0599 dk: 0.0069

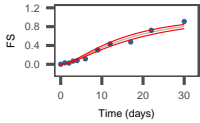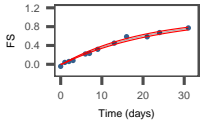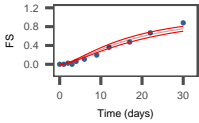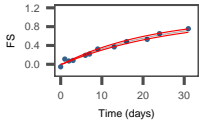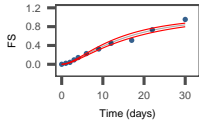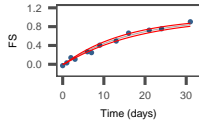



TITIN - NAADSVSESPSTGPITVK\_2

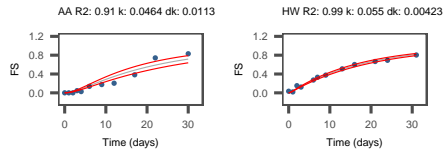

TITIN - NSFTIPSQPGIPEEVGAGK\_2

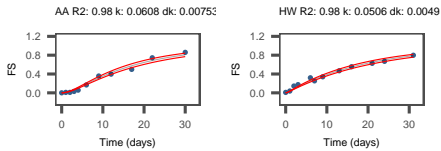

TITIN - PIYDGGSEILGYVVEICK\_2

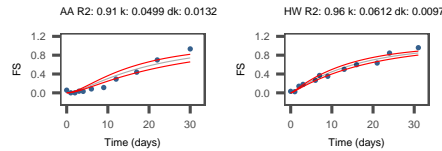

TITIN - NAAHEDGGIYSLTVENPAGTK\_3

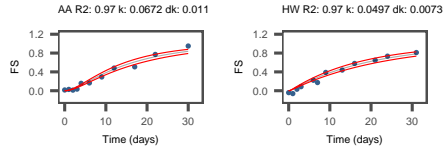

TITIN - NSVLSWEKPEHDGGR\_3

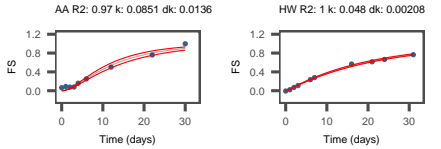

TITIN - PIYDGGSEILGYVVEICK\_3

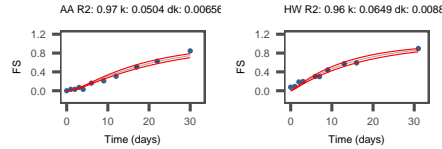

TITIN - NAFVTPGPPSIEVTK\_2

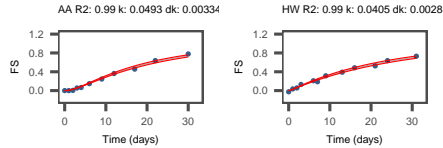

TITIN - NTAGAISAPSESTGTICK\_2

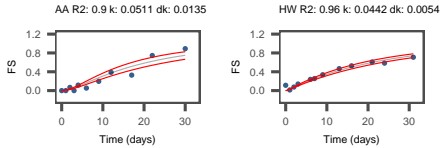

TITIN - PLPVISWAK\_2

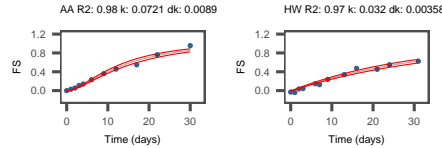

TITIN - NCAMADESVYGFK\_2

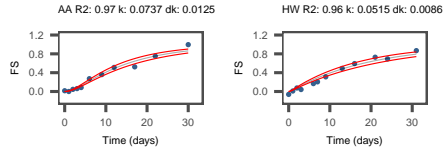

TITIN - NVHFGDAADYTFVAGK\_3

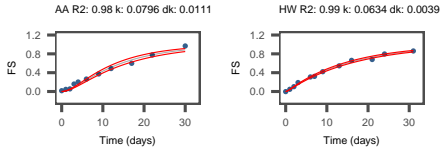

TITIN - PMYDGGTDIIGYVLEMQEK\_2

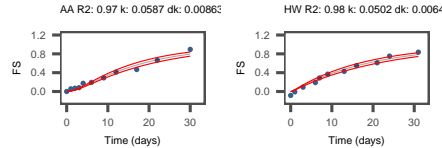

TITIN - NPFVVPDAPK\_2

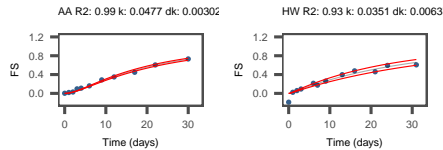

TITIN - PIALQLQSDQK\_2

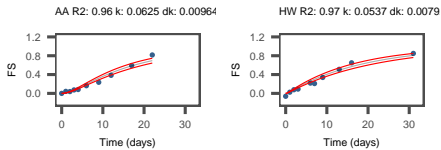

TITIN - PPTAVVSKPDSNLSIR\_3

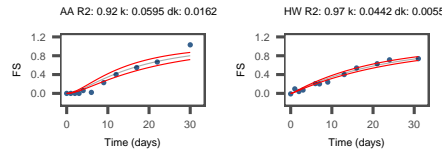

TITIN - NSDIIVPHK\_2

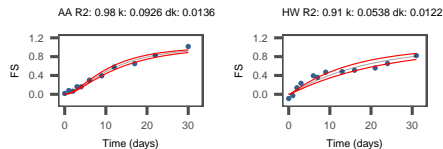

TITIN - PIYDGGCEIGYVIEK\_2

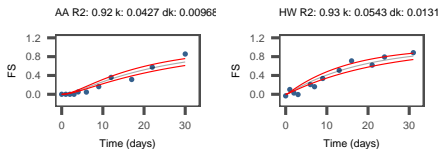

TITIN - QEAQFLTQVK\_2

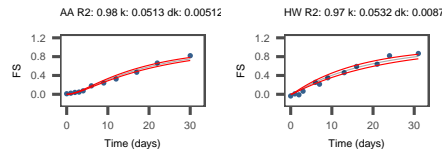



TITIN - SSWFEDGK\_2

AA R2: 0.98 k: 0.0653 dk: 0.00867

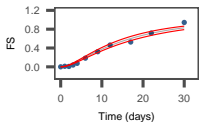

HW R2: 0.98 k: 0.0415 dk: 0.0046

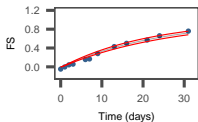

TITIN - TPILAINPIDRPGEPENLHIAKD\_4

AA R2: 0.98 k: 0.0774 dk: 0.00824

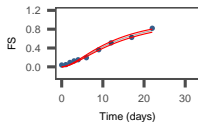

HW R2: 0.9 k: 0.0723 dk: 0.0155

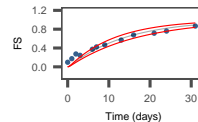

TITIN - VAAENAIGGSDYTEIGDSVLAK\_2

AA R2: 0.98 k: 0.0589 dk: 0.00667

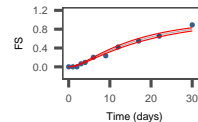

HW R2: 0.97 k: 0.0553 dk: 0.0063

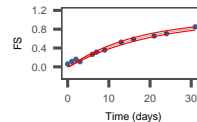

TITIN - STMVSVSQVQVNDGGSQVIGYHLEJK\_3

AA R2: 0.96 k: 0.0908 dk: 0.0179

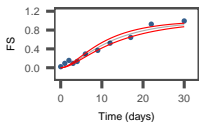

HW R2: 0.98 k: 0.0517 dk: 0.0058

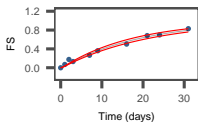

TITIN - TQVVDCEGYTCK\_2

AA R2: 0.97 k: 0.0548 dk: 0.00806

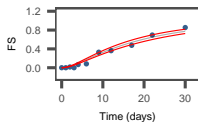

HW R2: 0.93 k: 0.0553 dk: 0.0142

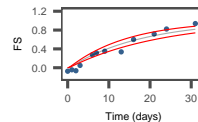

TITIN - VAAENMYGVGEPVQAAPIAIK\_2

AA R2: 0.97 k: 0.0581 dk: 0.00885

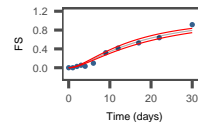

HW R2: 0.99 k: 0.0485 dk: 0.0033

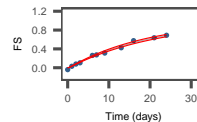

TITIN - SVDDSEVGTGVTGAQK\_2

AA R2: 0.99 k: 0.0661 dk: 0.00635

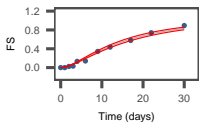

HW R2: 0.91 k: 0.0958 dk: 0.0233

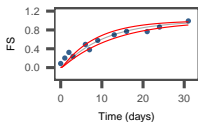

TITIN - TSCHVSWAPPENDGGSQVTHYIVEK\_4

AA R2: 0.91 k: 0.0762 dk: 0.0229

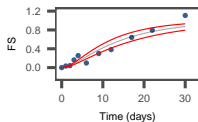

HW R2: 0.97 k: 0.0521 dk: 0.0055

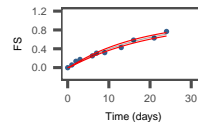

TITIN - VCAVNAAGVGFSEPSDFYK\_2

AA R2: 0.94 k: 0.0794 dk: 0.0155

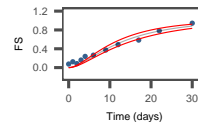

HW R2: 0.99 k: 0.0546 dk: 0.0039

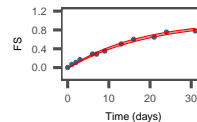

TITIN - TCEIEIGQLK\_2

AA R2: 0.99 k: 0.043 dk: 0.0031

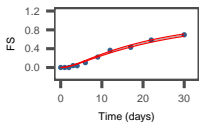

HW R2: 0.91 k: 0.039 dk: 0.0075

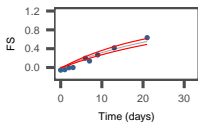

TITIN - TSSDVLHGSVSSQVQMSASK\_3

AA R2: 0.91 k: 0.0572 dk: 0.0163

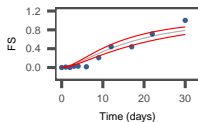

HW R2: 0.98 k: 0.0615 dk: 0.0070

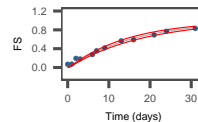

TITIN - VEKPLYGVEVFGETAR\_3

AA R2: 0.98 k: 0.077 dk: 0.00931

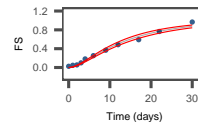

HW R2: 0.97 k: 0.0756 dk: 0.0099

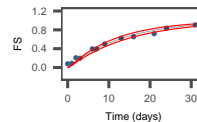

TITIN - TEAYVSSFK\_2

AA R2: 0.92 k: 0.0952 dk: 0.0252

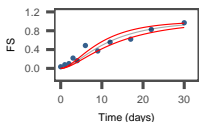

HW R2: 0.98 k: 0.0505 dk: 0.0048

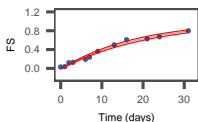

TITIN - TTPTLALEK\_2

AA R2: 0.98 k: 0.0737 dk: 0.0095

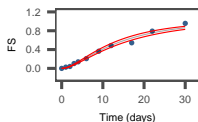

HW R2: 0.97 k: 0.0411 dk: 0.0051

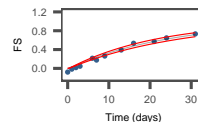

TITIN - VETCSNLSEVK\_2

AA R2: 0.99 k: 0.0712 dk: 0.00461

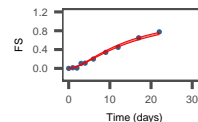

HW R2: 0.95 k: 0.048 dk: 0.0101

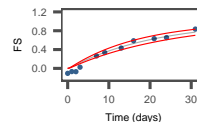

TITIN - TGGSPITGYHIEFK\_3

AA R2: 0.98 k: 0.0764 dk: 0.00886

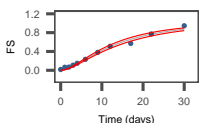

HW R2: 0.98 k: 0.0484 dk: 0.005

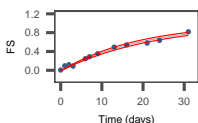

TITIN - TVLMSSEK\_2

AA R2: 0.98 k: 0.0494 dk: 0.00514

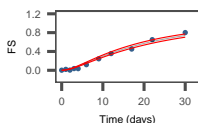

HW R2: 0.94 k: 0.0316 dk: 0.0053

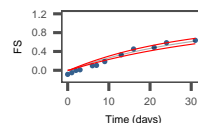

TITIN - VGVGPTIETK\_2

AA R2: 0.99 k: 0.0701 dk: 0.00756

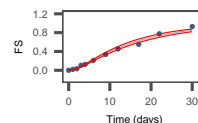

HW R2: 0.95 k: 0.0535 dk: 0.0077

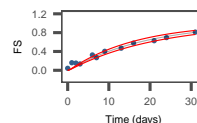

TITIN – VLACNAGGPGEPAEVPGVTK\_2

AA R2: 0.98 k: 0.0586 dk: 0.00772

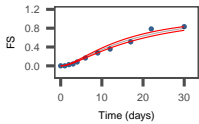

HW R2: 0.99 k: 0.0501 dk: 0.0046

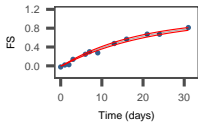

TITIN – VLDRPGPPEGPVQVTGVTAEK\_3

AA R2: 0.98 k: 0.0634 dk: 0.00896

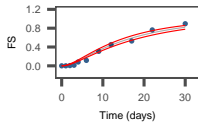

HW R2: 0.94 k: 0.0604 dk: 0.0095

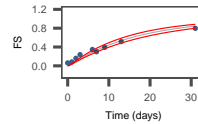

TITIN – VLGPIVIAK\_2

AA R2: 0.99 k: 0.0751 dk: 0.0079

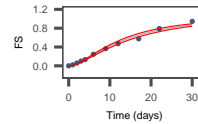

HW R2: 0.98 k: 0.0403 dk: 0.0041

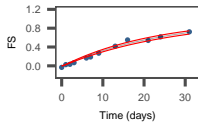

TITIN – VLAENEIGIPCEPTEPVK\_2

AA R2: 0.92 k: 0.0541 dk: 0.0143

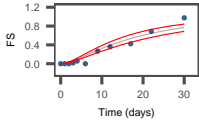

HW R2: 0.92 k: 0.0461 dk: 0.011

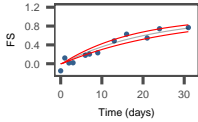

TITIN – VLDTPAACQK\_2

AA R2: 0.99 k: 0.0624 dk: 0.00666

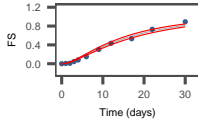

HW R2: 0.92 k: 0.0618 dk: 0.0119

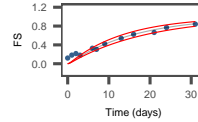

TITIN – VLIAEIVKR\_3

AA R2: 0.97 k: 0.0822 dk: 0.0127

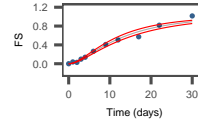

HW R2: 0.99 k: 0.056 dk: 0.0049

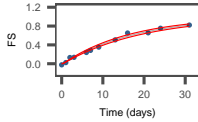

TITIN – VLAENYIGLPAETAESVK\_2

AA R2: 0.91 k: 0.0552 dk: 0.0132

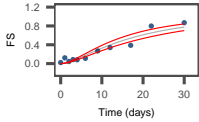

HW R2: 0.96 k: 0.043 dk: 0.00725

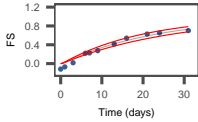

TITIN – VLDTGPPQNLAVK\_2

AA R2: 0.98 k: 0.064 dk: 0.0081

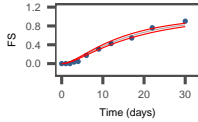

HW R2: 0.96 k: 0.0401 dk: 0.0055

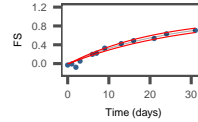

TITIN – VLPTIDLSTMPQK\_2

AA R2: 0.97 k: 0.0755 dk: 0.0107

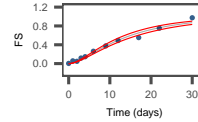

HW R2: 0.98 k: 0.0694 dk: 0.0095

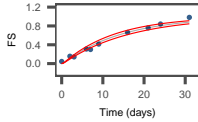

TITIN – VLASNEYIGLPAETAEPVK\_2

AA R2: 0.94 k: 0.0551 dk: 0.0117

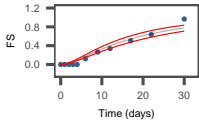

HW R2: 0.99 k: 0.0534 dk: 0.0035

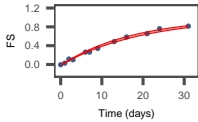

TITIN – VLDTGPPQNLK\_2

AA R2: 0.97 k: 0.0696 dk: 0.0103

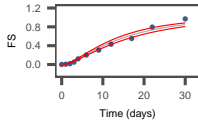

HW R2: 0.92 k: 0.0398 dk: 0.0067

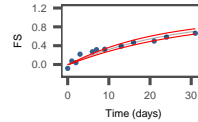

TITIN – VLVLDPKGPFR\_3

AA R2: 0.99 k: 0.0716 dk: 0.0076

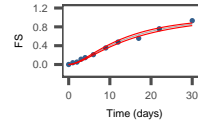

HW R2: 0.97 k: 0.0346 dk: 0.0040

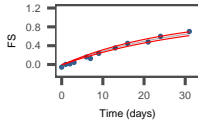

TITIN – VLDRPGPPEGPLAVSDVTSEK\_3

AA R2: 0.92 k: 0.0522 dk: 0.0125

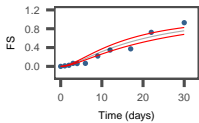

HW R2: 0.98 k: 0.0554 dk: 0.0060

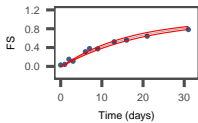

TITIN – VLDTGPPVNLRLPTDITK\_3

AA R2: 0.98 k: 0.0701 dk: 0.00802

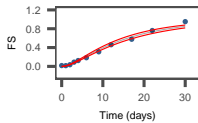

HW R2: 0.98 k: 0.0505 dk: 0.0042

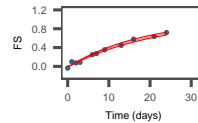

TITIN – VMAENEFVGVPTETSDAVK\_2

AA R2: 0.98 k: 0.0739 dk: 0.00924

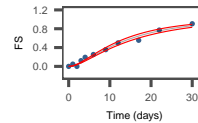

HW R2: 0.99 k: 0.0514 dk: 0.0029

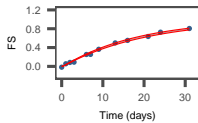

TITIN – VLDRPGPPEGPVAISGVTAEK\_3

AA R2: 0.97 k: 0.0631 dk: 0.00835

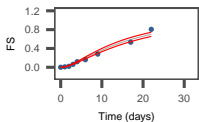

HW R2: 0.98 k: 0.0468 dk: 0.0045

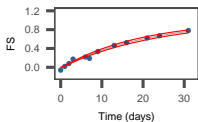

TITIN – VLDTGPPVNLK\_2

AA R2: 0.98 k: 0.076 dk: 0.00985

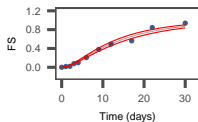

HW R2: 0.99 k: 0.0459 dk: 0.0037

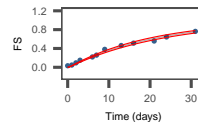

TITIN – VMDFVTDLEFTVPDLVGGK\_2

AA R2: 0.97 k: 0.0782 dk: 0.0116

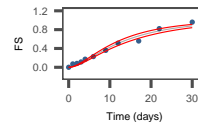

HW R2: 0.94 k: 0.046 dk: 0.0105

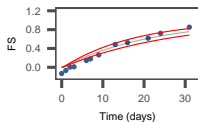

TITIN - VNAESTENSLTIK\_2

AA R2: 0.99 k: 0.0355 dk: 0.00241

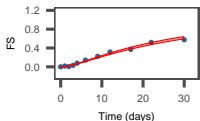

HW R2: 0.92 k: 0.0497 dk: 0.0092

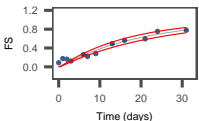

TITIN - VSAQNTFGISEPLEVASIHK\_2

AA R2: 0.94 k: 0.0647 dk: 0.0146

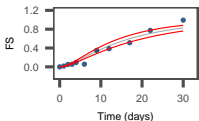

HW R2: 0.97 k: 0.0516 dk: 0.0075

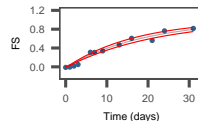

TITIN - WYLNDEQIKPDDR\_3

AA R2: 0.98 k: 0.0687 dk: 0.00856

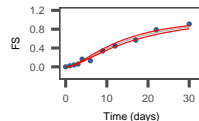

HW R2: 0.9 k: 0.041 dk: 0.0114

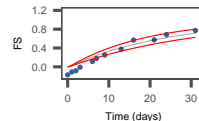

TITIN - VPAPAEVPTPTLVSLGK\_2

AA R2: 0.96 k: 0.0693 dk: 0.013

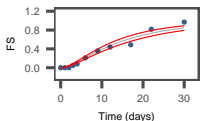

HW R2: 0.99 k: 0.0492 dk: 0.0027

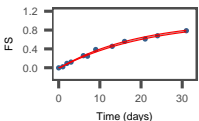

TITIN - VLTLDVQSATSASLMWEKPEHDGGSR\_4

AA R2: 0.95 k: 0.086 dk: 0.0174

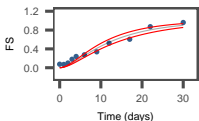

HW R2: 0.94 k: 0.0574 dk: 0.0070

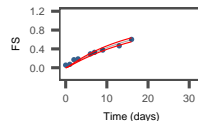

TITIN - YDGGSSINNYIVEK\_2

AA R2: 0.95 k: 0.0775 dk: 0.0152

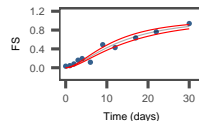

HW R2: 0.99 k: 0.06 dk: 0.00489

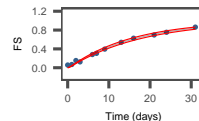

TITIN - VPCLECNKY\_2

AA R2: 0.96 k: 0.0661 dk: 0.0124

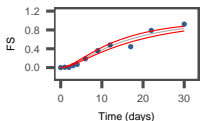

HW R2: 0.95 k: 0.05 dk: 0.00861

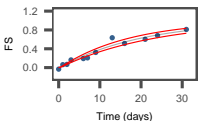

TITIN - VVWSMAENLEECIVTTTK\_2

AA R2: 0.94 k: 0.0482 dk: 0.00751

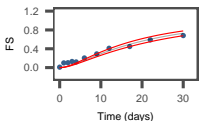

HW R2: 0.98 k: 0.0635 dk: 0.0068

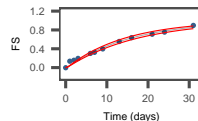

TITIN - YEITAANSSGTTK\_2

AA R2: 0.96 k: 0.0789 dk: 0.0138

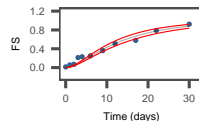

HW R2: 0.99 k: 0.0421 dk: 0.0033

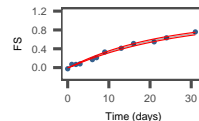

TITIN - VPGPPGTFVTLASK\_2

AA R2: 0.98 k: 0.0539 dk: 0.0051

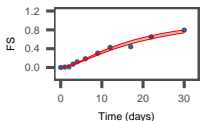

HW R2: 0.96 k: 0.0319 dk: 0.0041

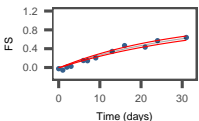

TITIN - VYAENSAGLSSPSPSK\_2

AA R2: 0.98 k: 0.063 dk: 0.00821

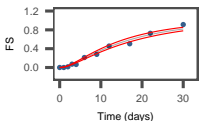

HW R2: 1 k: 0.0464 dk: 0.00197

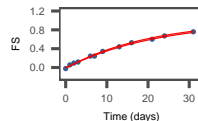

TITIN - YGQSFALSEPVAQYPYK\_2

AA R2: 0.98 k: 0.0637 dk: 0.00804

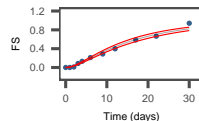

HW R2: 0.97 k: 0.0537 dk: 0.0081

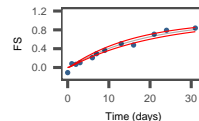

TITIN - VPGPPGTQVTAVK\_2

AA R2: 0.98 k: 0.0722 dk: 0.0105

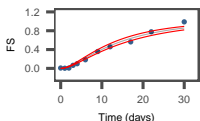

HW R2: 0.99 k: 0.0404 dk: 0.0026

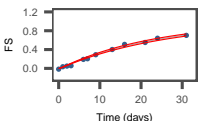

TITIN - WEEPYHDGGSK\_2

AA R2: 0.91 k: 0.0436 dk: 0.0108

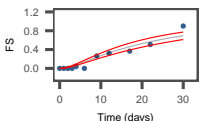

HW R2: 0.93 k: 0.0388 dk: 0.0076

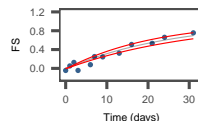

TITIN - YGTDHTSATLVK\_3

AA R2: 0.97 k: 0.0866 dk: 0.015

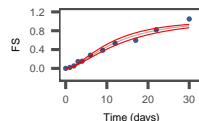

HW R2: 0.97 k: 0.0498 dk: 0.0072

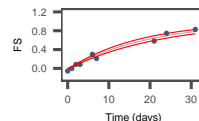

TITIN - VSAENAAGVGEPSATVYK\_2

AA R2: 0.95 k: 0.0669 dk: 0.0138

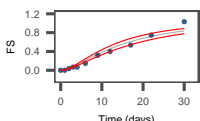

HW R2: 0.99 k: 0.049 dk: 0.00362

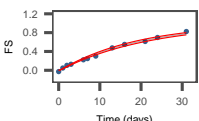

TITIN - WEPPLDDGGSEIINTLEK\_2

AA R2: 0.92 k: 0.0888 dk: 0.0233

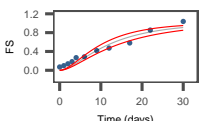

HW R2: 0.97 k: 0.054 dk: 0.00815

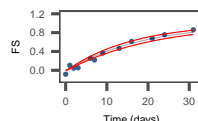

TITIN - YGVDGPILTEPAIK\_2

AA R2: 0.96 k: 0.0661 dk: 0.0118

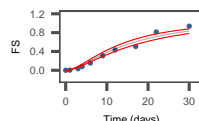

HW R2: 0.98 k: 0.0572 dk: 0.0064

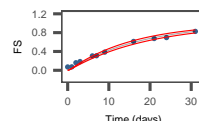



TITIN – YGVGPELESAPVLMK\_2

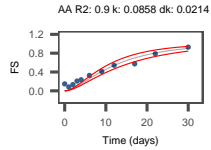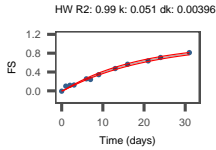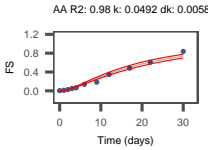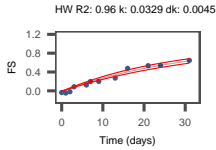

TLN1 – VLQNAAGSQEK\_2

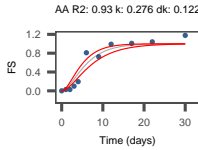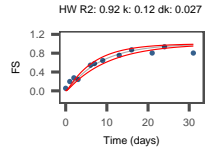

TITIN – YGVGPGITSASVANYPFK\_2

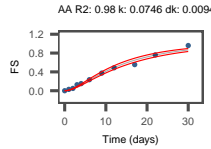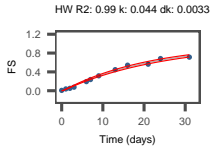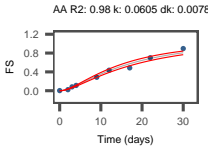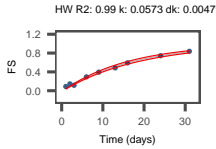

TMOD1 – SNDPVAFALAEMLK\_3

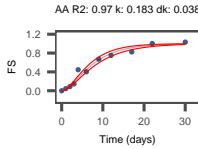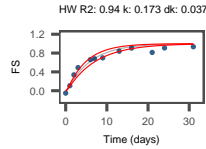

TITIN – YGVSGDQTLTIK\_2

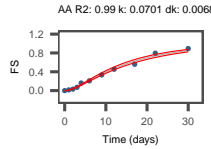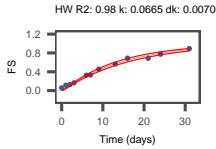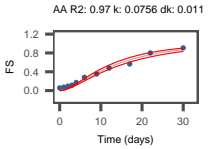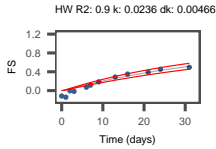

TNNC1 – AAFDFVLGAEDGCISTK\_3

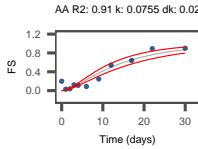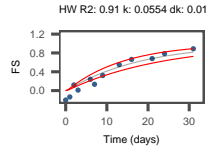

TITIN – YLTIENGVGQPK\_2

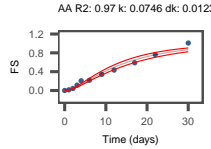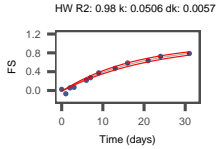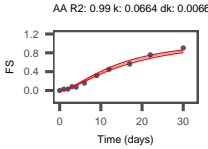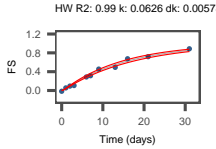

TNNC1 – AAVEQLTEEQK\_2

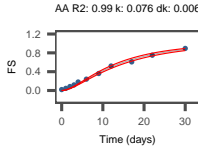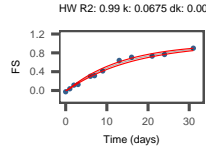

TITIN – YLTVENSSGSK\_2

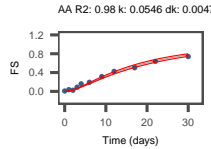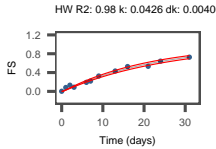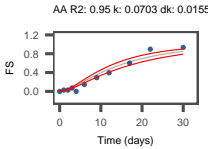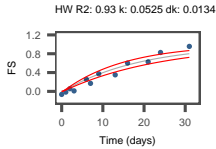

TNNC1 – IDYDFLEFMK\_2

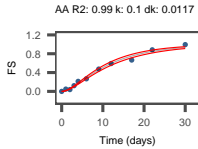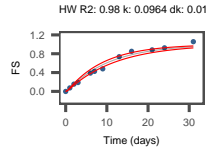

TITIN – YNLLENSSGSK\_2

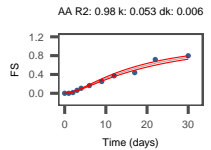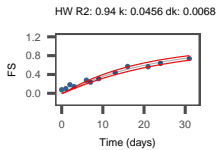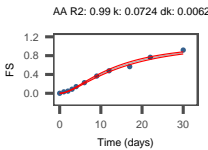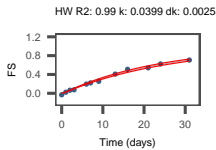

TNNC1 – AYATEPHAJK\_2

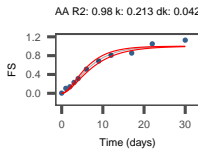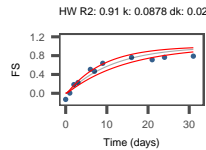



TPM1 – KLVIIESDLER\_3

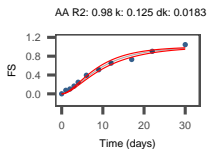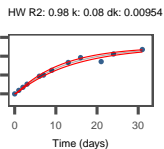

TPM3(Non-Unique) – LATALQK\_2

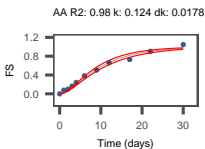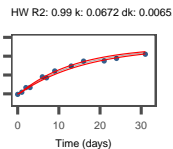

TRFE – SAGWVPIGLLFC\_2

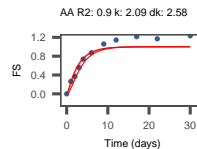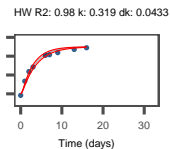

TPM1(Non-Unique) – LDKENALDR\_2

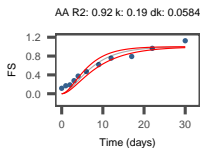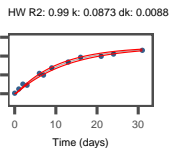

TPM3(Non-Unique) – MELQEILK\_2

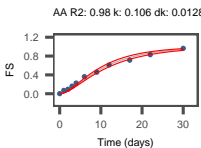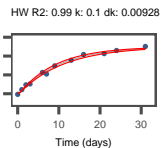

TRI72 – LPGVPVPIFDVCWHDK\_3

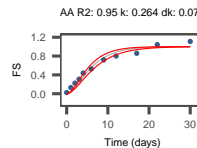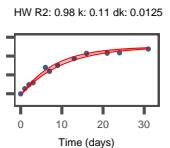

TPM1 – QLEDELVSLQK\_2

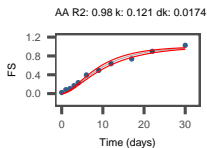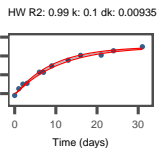

TRFE – ASDTSITWNNLK\_2

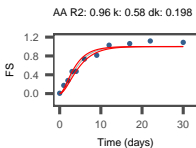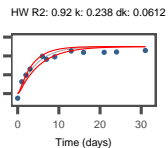

TTHY – TSEGSWEFPASGK\_2

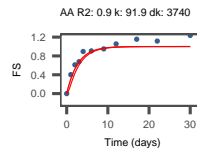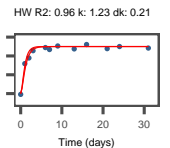

TPM1 – SIDDLEDELYAQK\_2

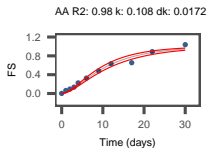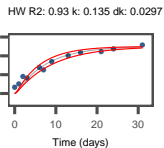

TRFE – EDLIWEILK\_2

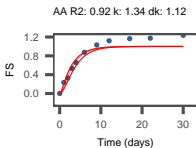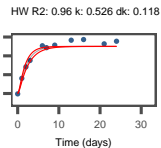

UBA1 – AAVASLLQSVQVPEFTP\_3

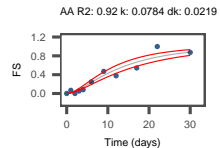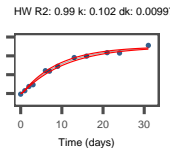

TPM1 – SIDDLEDELYAQK\_3

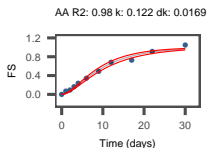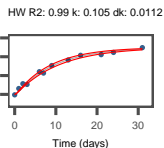

TRFE – GTDFQLNLEQK\_2

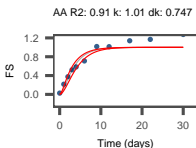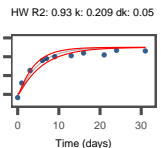

UBA1Y(Non-Unique) – DEFEGFLK\_2

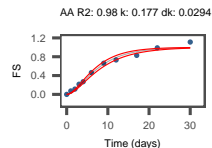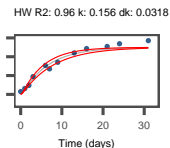

TPM3(Non-Unique) – KYEEVAR\_2

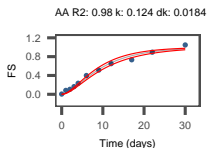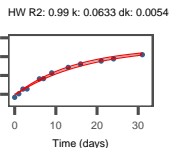

TRFE – GYAVAVVK\_2

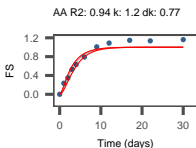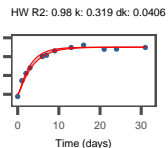

UBB(Non-Unique) – TITLEVPSTIENVK\_2

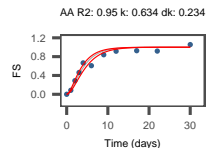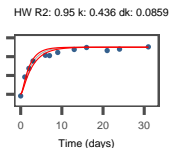

UBB(Non-Unique) – TLSYNIQK\_2

VDAC1 – KLETAVNLAWTAGNSNR\_2

VDAC2 – LTLSALVDGK\_2

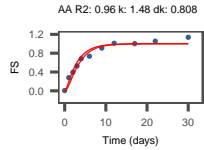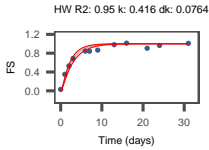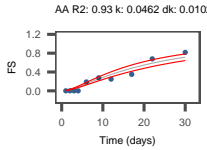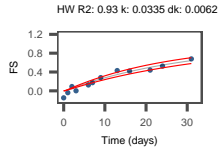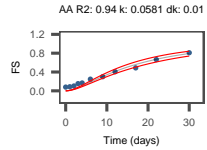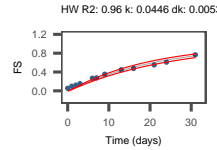

UCRI – GVAGALRPLLQGVPAASEPPLVDVK\_3

VDAC1 – LTFDSSFSPTGK\_2

VDAC2 – WNTDNTLGTETAIEDIQCGGLK\_2

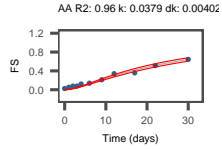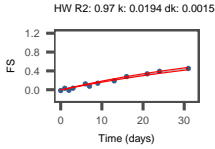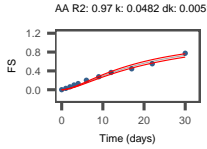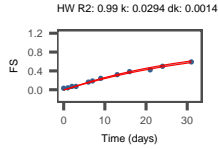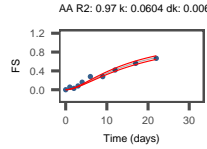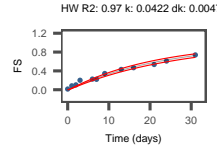

UCRI – KGPAPLNLEVPAYEFTSDDVVVG\_2

VDAC1 – VNNSSLIGLYGTQLK\_2

VDAC3 – AADFQLHTHVNDGTEFGGSYQK\_4

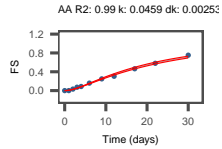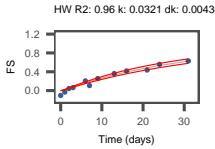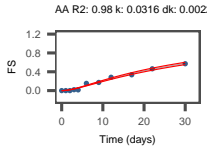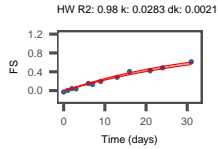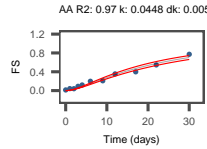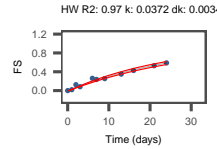

UCRI – RAEVLDSTK\_2

VDAC1 – WTEYGLTFTEK\_2

VDAC3 – WNTDNTLGTETISWENK\_2

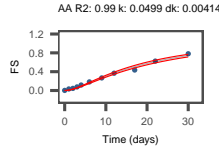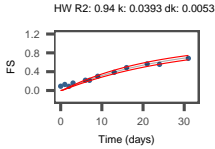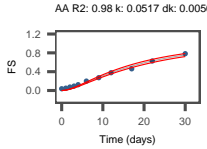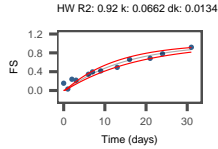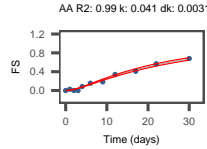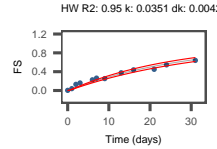

UGPA – ILTTAASHEFHTK\_3

VDAC2 – GFGFLVK\_2

VIME – ILLAELEQLK\_2

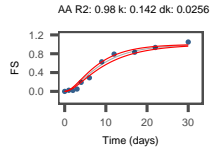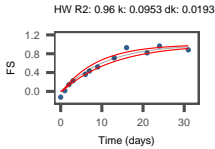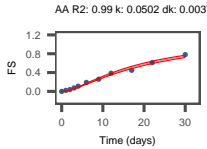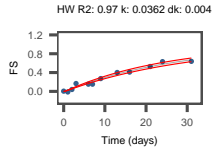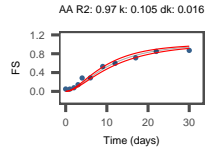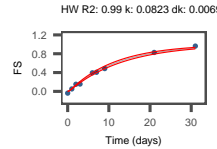

UGPA – TLDGGLNVIQLETAVGAAIK\_2

VDAC2 – LTFDITFSPTGK\_2

VIME – LLQSDVDFSLADAINTEFK\_2

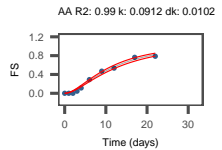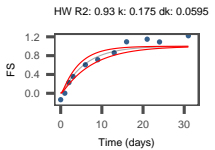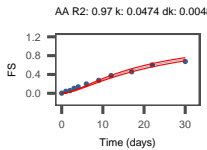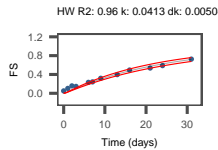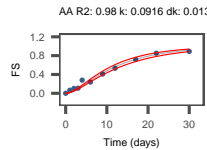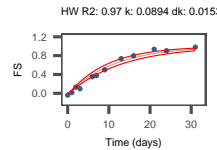

VIME - QVQLSTCEVDALK\_2

WDR1 - VINSVDIK\_2

AA R2: 0.98 k: 0.0804 dk: 0.0107

HW R2: 0.93 k: 0.091 dk: 0.0202

AA R2: 0.99 k: 0.122 dk: 0.0141

HW R2: 0.95 k: 0.0467 dk: 0.00934

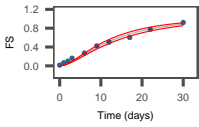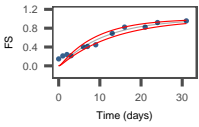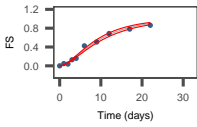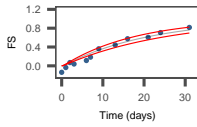

VINC - AQVVSQGLDVLTAK\_2

WDR1 - VYSILASTLK\_2

AA R2: 0.94 k: 0.0482 dk: 0.00801

HW R2: 0.98 k: 0.0353 dk: 0.0035

AA R2: 0.97 k: 0.0862 dk: 0.0151

HW R2: 0.96 k: 0.0441 dk: 0.00688

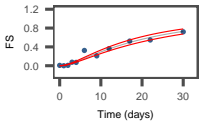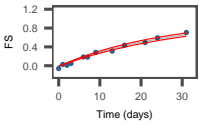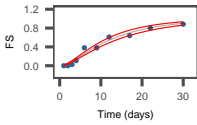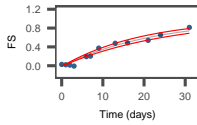

VINC - ELLPVLISAMK\_2

WDR1 - YAPSGFYIASGDISGK\_2

AA R2: 0.95 k: 0.06 dk: 0.00994

HW R2: 0.98 k: 0.0304 dk: 0.0025

AA R2: 0.96 k: 0.1 dk: 0.0217

HW R2: 0.94 k: 0.0555 dk: 0.012

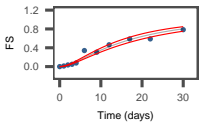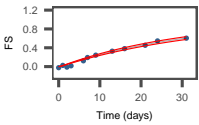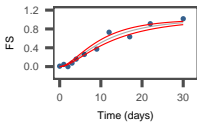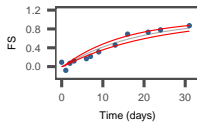

VINC - QVATALQNLQTK\_2

AA R2: 0.94 k: 0.0514 dk: 0.00861

HW R2: 0.97 k: 0.0338 dk: 0.00367

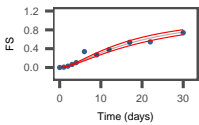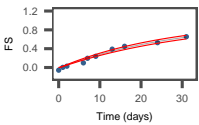

VINC - VLQLTSWDEDAWASK\_2

AA R2: 0.92 k: 0.0625 dk: 0.013

HW R2: 0.92 k: 0.0292 dk: 0.00561

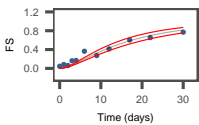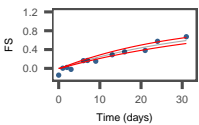

VWA8 - LLYSVGANVSAEK\_2

AA R2: 0.93 k: 0.0449 dk: 0.0101

HW R2: 0.94 k: 0.0242 dk: 0.00317

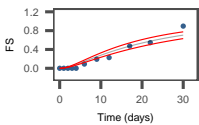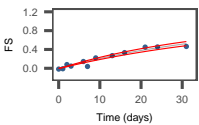

Supplement: mmc2.pdf [file mmc2.pdf]
