# Supplementary material for: Harmonizing Labeling and Analytical Strategies to Obtain Protein Turnover Rates in Intact Adult Animals
Source: PubMed Central journal article supplement (PMC9249856; doi:10.1016/j.mcpro.2022.100252), 2022-05-28

1433B – TAFDDAIAELDTLNEESYK\_2

1433Z – FLIPNASQPESK\_2

3H1DH – EAGEQVASSPAEVAEK\_2

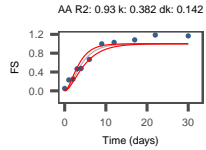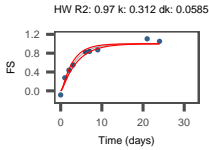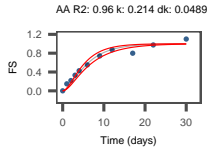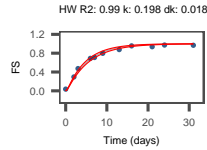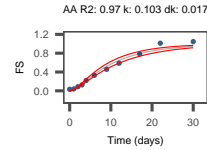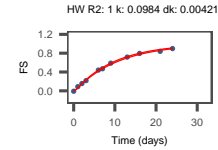

1433E – AAFDDAIAELDTLSEESYK\_2

1433Z – GIVDQSQAYQEAFEISK\_2

4F2 – LGASNLPAIGLSPASAK\_2

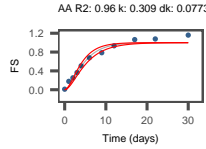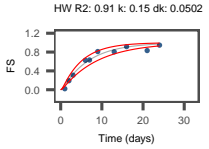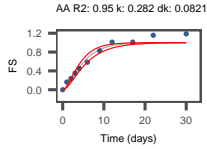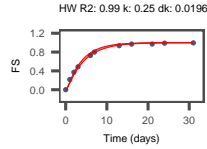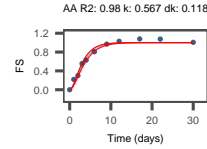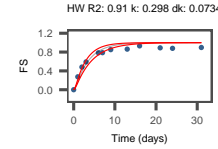

1433E – AAFDDAIAELDTLSEESYK\_3

1433Z – TAFDDAIAELDTLSEESYK\_2

6PGD – AIFQAIK\_2

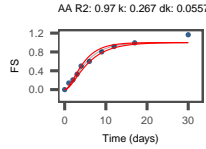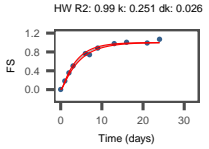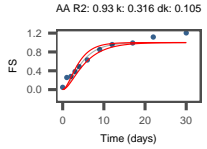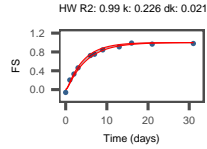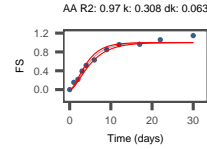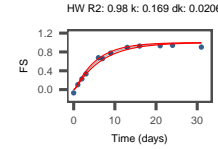

1433E – DNLTLTWSDMQGDGEEQNK\_2

1433Z – TAFDDAIAELDTLSEESYK\_3

6PGD – NPQLNLLLDFFK\_2

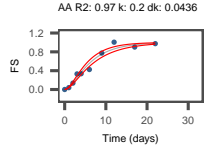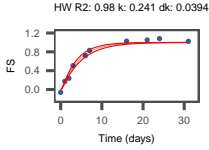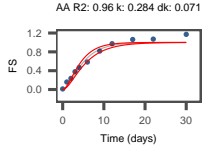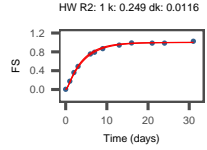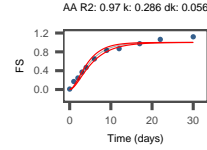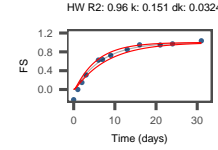

1433T – TAFDDAIAELDTLNEDSYK\_3

1433Z – VVSSIEQK\_2

A1AT1(Non-Unique) – LSIISGEYNLK\_2

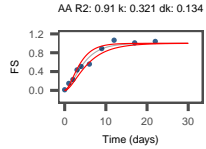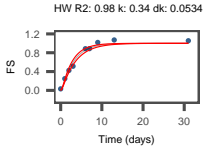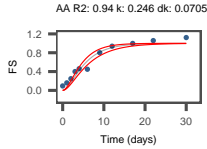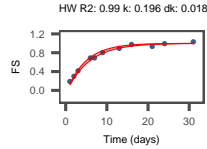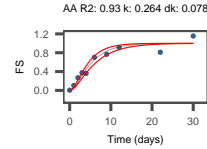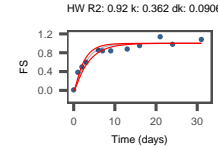

1433Z – DICNDVLSLEK\_2

1433Z – YDDMAACMK\_2

AADAT – AGMFLWIK\_2

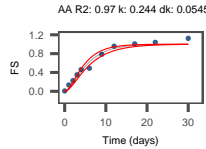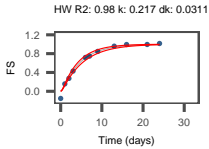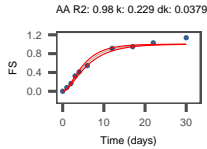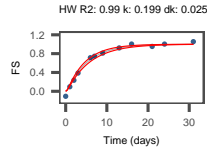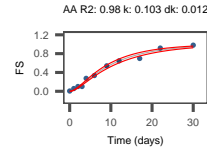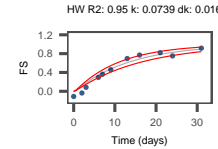

**AADAT – ALQYSPSYGIPPELLSWLK\_2**

**AATC – APPSFAVQVPQAPPVLVFK\_3**

**ABCD3 – EGGWDSVQDWMVDLVSGGK\_2**

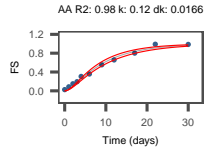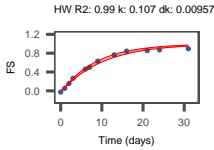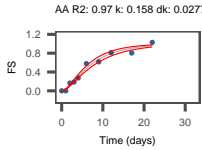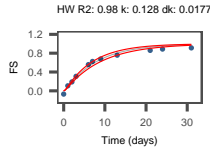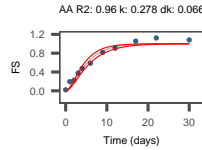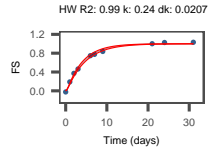

**AADAT – ALQYSPSYGIPPELLSWLK\_3**

**AATM – EYLPGLGAEFCK\_2**

**ABCG2 – LFDSLTLLASGK\_2**

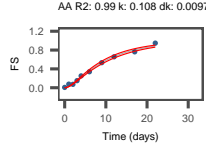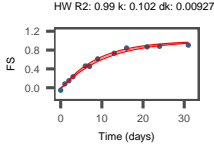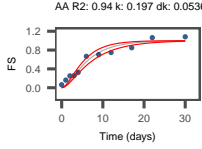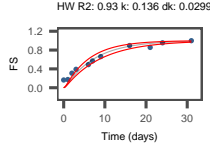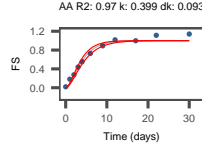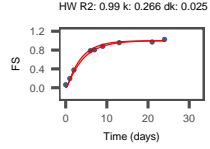

**AADAT – SKPWEPTFLSMDVDR\_3**

**AATM – NLFAFFDMAYQGFASGDGDK\_2**

**ABCG2(Non-Unique) – VSSYFFGK\_2**

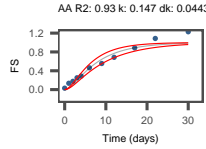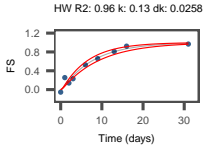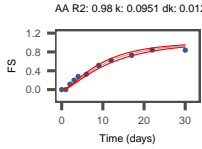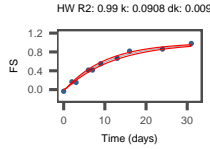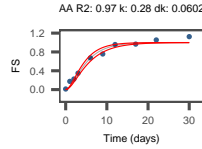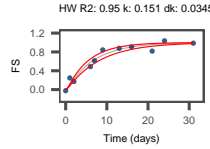

**AADAT – TTADILSK\_2**

**AATM – NLFAFFDMAYQGFASGDGDK\_3**

**ABHDB – LNLDTLAQLDK\_3**

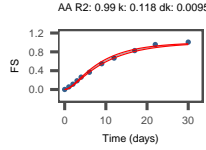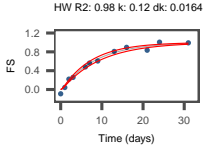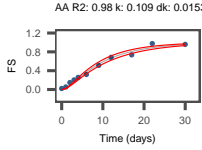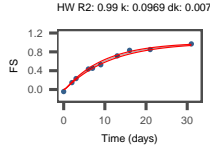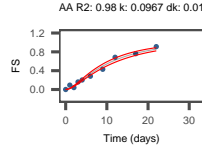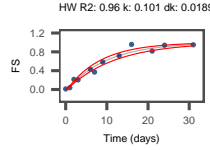

**AASS – AEGVFNQTSTIK\_2**

**AATM – SSWWTHVEMGPPDILGVTEAFK\_3**

**ABHEB – TPALIVYGDQDPMGSSSFQHLK\_3**

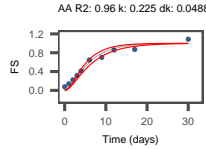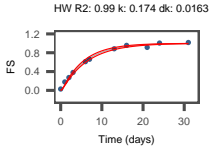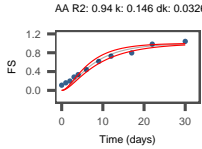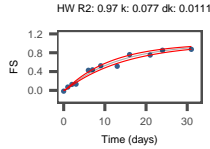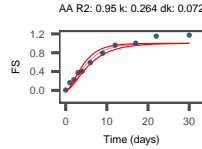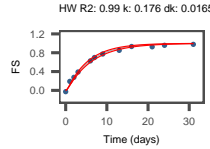

**AASS – SIGPLTFVFTGTGNVSK\_2**

**AATM – TCGDFSGALEDISK\_2**

**ACADL – LPANALLGEENK\_2**

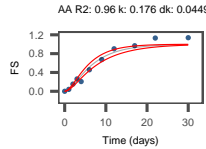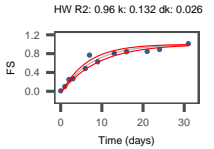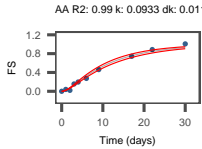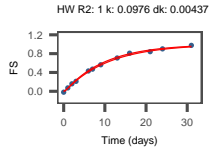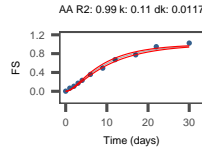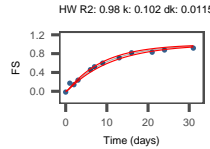





ACON - LNRPLTSEK\_3

ACOT9 - NIHEFLTTLDPK\_3

ACOX1 - SEPEPQLDFQTQYK\_3

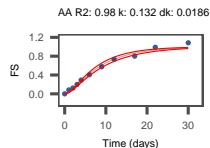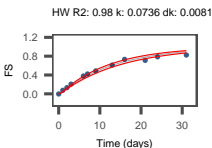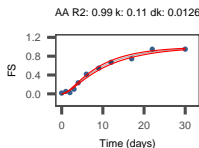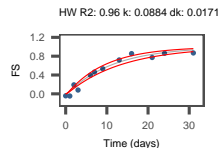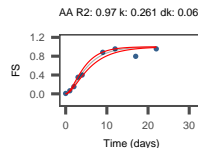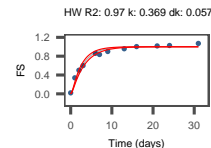

ACON - LTGSLSGWTSPK\_2

ACOX1 - ASEAHCHYTVK\_2

ACOX1 - TEVHESYK\_3

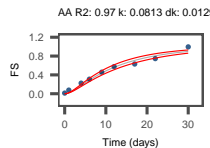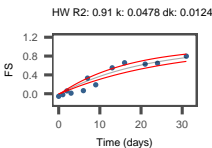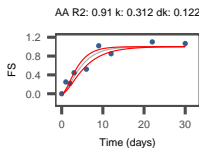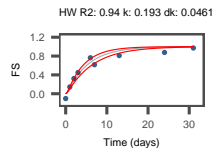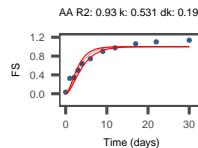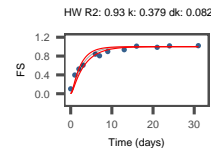

ACON - SDFDPGQDTYHPPK\_3

ACOX1 - EFGIADPEEMWFK\_2

ACOX1 - TQEFILNSPTVTSIK\_2

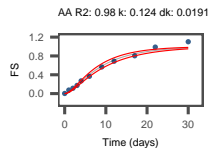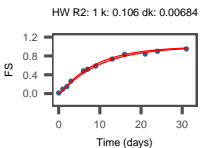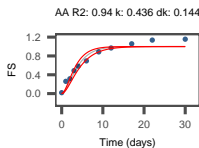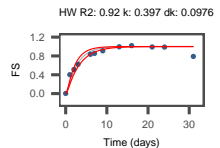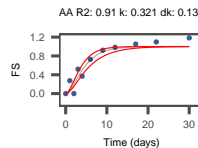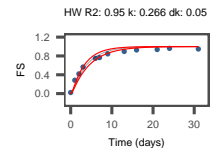

ACON - VAVPSTIHCDHLIEAQVGEK\_4

ACOX1 - ILELLTVTRPNAVLDAFDK\_3

ACOX1 - YDGNVYENLFEWAK\_2

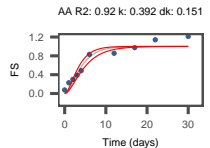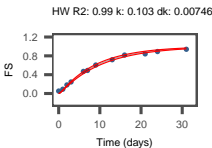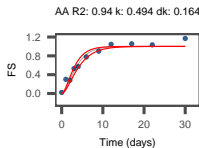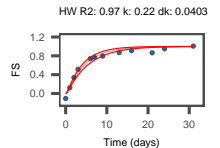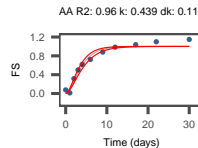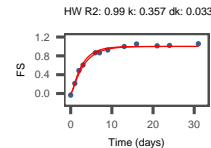

ACOT1(Non-Unique) - SDTTLFLVGQDDHWNK\_3

ACOX1 - LVEIAAK\_2

ACOX3 - TVDFLEAYPGILGQK\_3

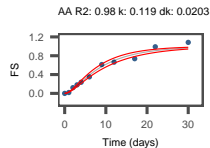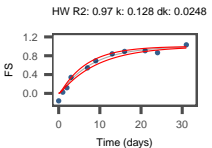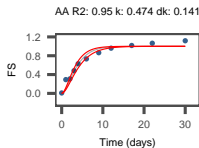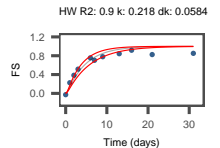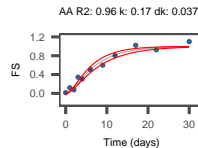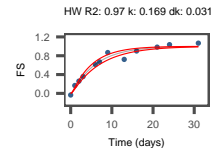

ACOT1(Non-Unique) - SEFYADEISK\_2

ACOX1 - SEPEPQLDFQTQYK\_2

ACPM - LMCPQEIVDIADK\_2

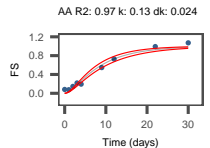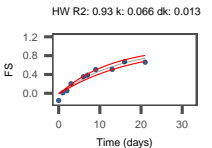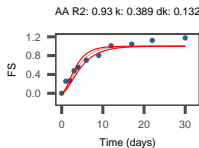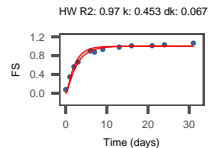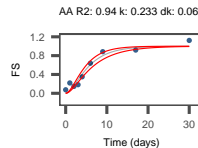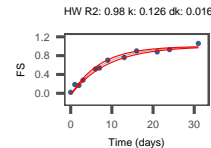



ACSM3 – YASDSHTCVDTK\_2

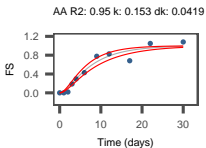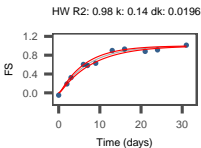

ACTB(Non-Unique) – KDLYANTVLSGGTMYMPIGIADR\_2

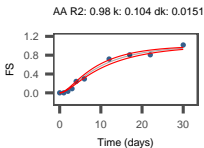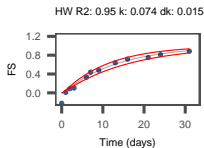

ACTN4 – EAILAIHK\_2

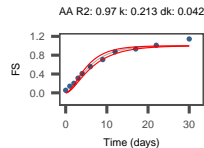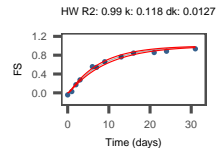

ACTA(Non-Unique) – YPIEHGHTNWDDM[15.9949]EK\_3

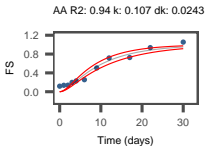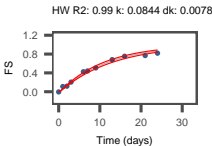

ACTB(Non-Unique) – VALDFEQEMATAASSSSLEK\_2

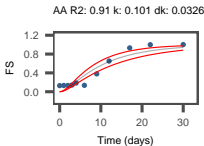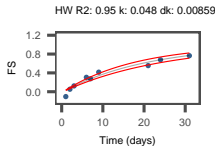

ACTN4 – ETTDTDTADQVIASFK\_2

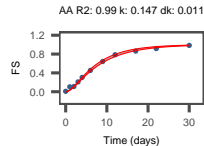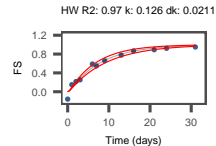

ACTA(Non-Unique) – YPIEHGHTNWDDMEK\_2

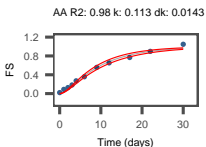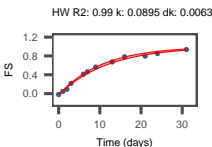

ACTB(Non-Unique) – VALDFEQEMATAASSSSLEK\_3

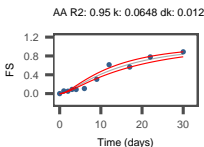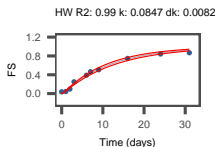

ACTN4 – HRPELIEYDK\_3

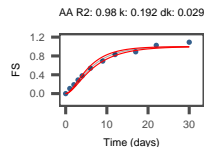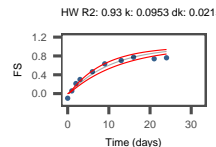

ACTB(Non-Unique) – DLTDYLM[15.9949]K\_2

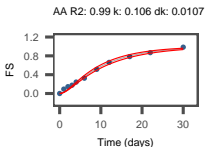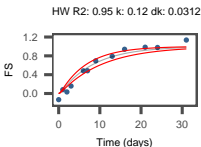

ACTB(Non-Unique) – VAPEEHPVLLTEAPLNPK\_2

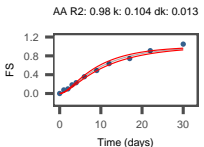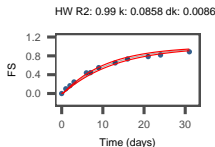

ACTN4 – MAPYQGPDAAPGALDYK\_2

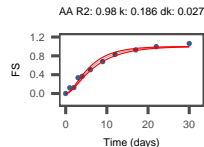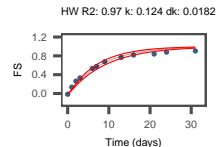

ACTB(Non-Unique) – DSYVGDEAQS\_2

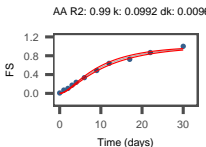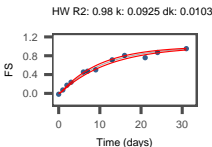

ACTB(Non-Unique) – VAPEEHPVLLTEAPLNPK\_3

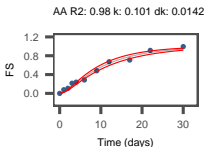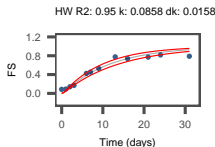

ACTN4 – RDHALLEEQSK\_2

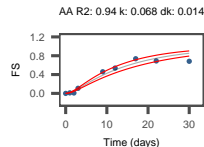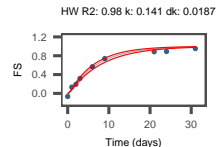

ACTB(Non-Unique) – HQGVM[15.9949]VGMGQK\_3

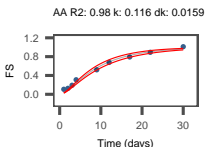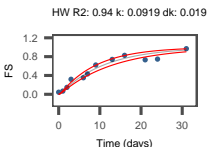

ACTN1 – LLETIDQLYLEYAK\_2

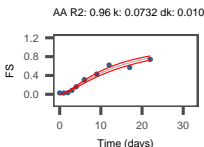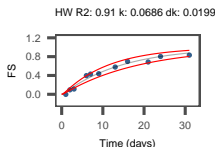

ACY3 – ELNQLLGP\_2

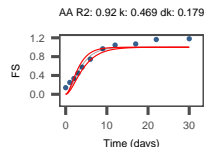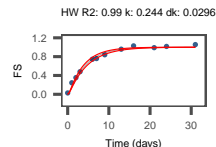





AK1A1 – ILQNIQVDFDTFSPEEMK\_2

AL1L1 – GQALPEVVAK\_2

AL4A1 – SAFEYGGQK\_2

AA R2: 0.96 k: 0.273 dk: 0.0672

HW R2: 0.98 k: 0.157 dk: 0.0241

AA R2: 0.99 k: 0.305 dk: 0.0452

HW R2: 0.99 k: 0.336 dk: 0.0329

AA R2: 0.93 k: 0.127 dk: 0.0422

HW R2: 0.99 k: 0.095 dk: 0.00657

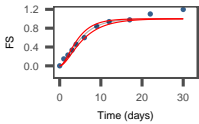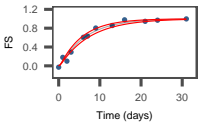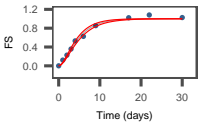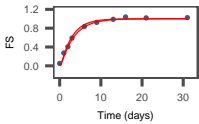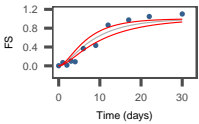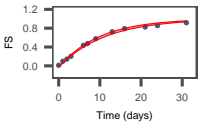

AK1A1 – MPLIGLGTWK\_2

AL1L1 – LQAGTVFNTYNK\_2

AL4A1 – VGDPADFDGTFSSAIDAK\_2

AA R2: 0.97 k: 0.304 dk: 0.0622

HW R2: 0.96 k: 0.13 dk: 0.0223

AA R2: 0.93 k: 0.642 dk: 0.253

HW R2: 0.95 k: 0.297 dk: 0.0547

AA R2: 0.91 k: 0.159 dk: 0.0582

HW R2: 1 k: 0.108 dk: 0.00564

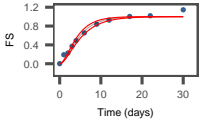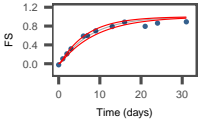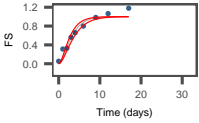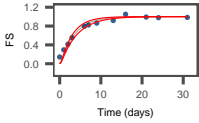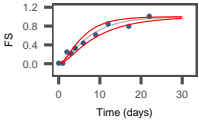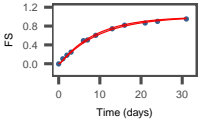

AK1CL – GIVLNTSLK\_2

AL1L1 – MMPASQFFK\_2

AL4A1 – VGDPADFDGTFSSAIDAK\_3

AA R2: 0.97 k: 0.54 dk: 0.144

HW R2: 0.99 k: 0.23 dk: 0.0235

AA R2: 0.97 k: 0.392 dk: 0.1

HW R2: 0.97 k: 0.147 dk: 0.0238

AA R2: 0.96 k: 0.147 dk: 0.0322

HW R2: 1 k: 0.114 dk: 0.00693

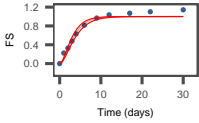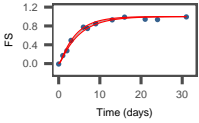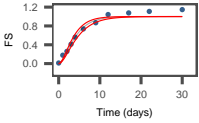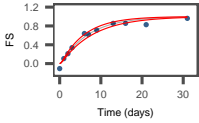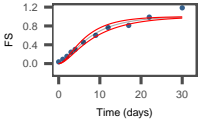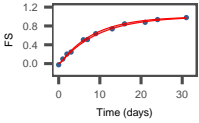

AK1CL – YGGWVDQNSPVLDEPVLGSMK\_3

AL3A2 – VMQEEIFGPILPIVSVK\_2

AL7A1 – AwnIWADIPAK\_2

AA R2: 0.94 k: 0.684 dk: 0.274

HW R2: 0.99 k: 0.327 dk: 0.0231

AA R2: 0.95 k: 0.252 dk: 0.0645

HW R2: 0.99 k: 0.22 dk: 0.0207

AA R2: 0.96 k: 0.196 dk: 0.0523

HW R2: 0.95 k: 0.0869 dk: 0.016

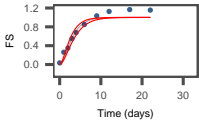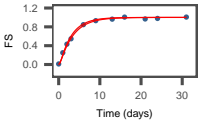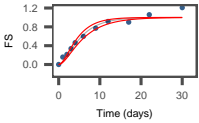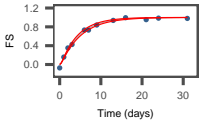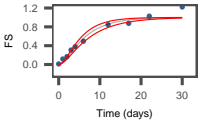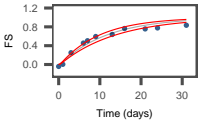

AK1CL – YIPAAIFK\_2

AL3A2 – VMQEEIFGPILPIVSVK\_3

AL7A1 – VNLLSFTGSTQVGK\_2

AA R2: 0.95 k: 0.528 dk: 0.166

HW R2: 0.98 k: 0.235 dk: 0.0328

AA R2: 0.95 k: 0.281 dk: 0.0801

HW R2: 0.98 k: 0.221 dk: 0.028

AA R2: 0.98 k: 0.181 dk: 0.0295

HW R2: 0.99 k: 0.136 dk: 0.0142

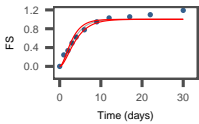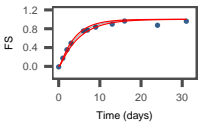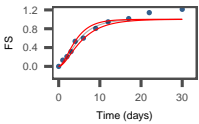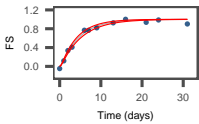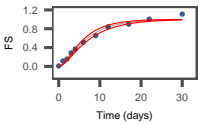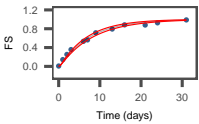

AL1A7(Non-Unique) – VTLEGGK\_2

AL3A2 – YLAPTILTDVPSNK\_2

AL8A1 – DSYDFTEIK\_2

AA R2: 0.97 k: 0.363 dk: 0.0765

HW R2: 0.98 k: 0.305 dk: 0.0431

AA R2: 0.99 k: 0.293 dk: 0.0377

HW R2: 0.98 k: 0.189 dk: 0.0304

AA R2: 0.91 k: 0.574 dk: 0.264

HW R2: 0.93 k: 0.358 dk: 0.107

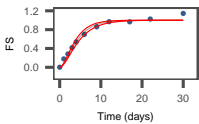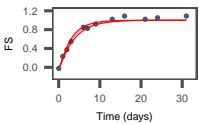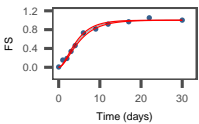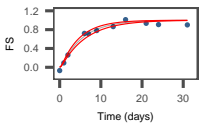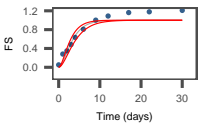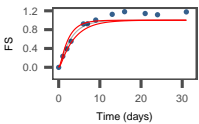







ARLY - EFSFVQLSDAYSTGSSLMPQK\_2

ASSY - VFIEDVSK\_2

AT1A1 - YQLSIHK\_2

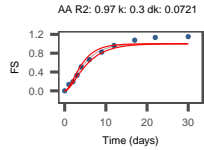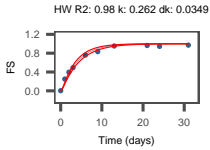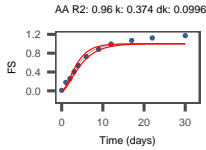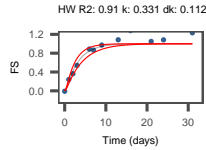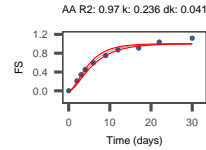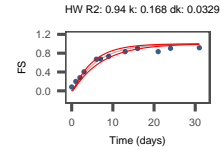

ARPC4 - HNKPEVEVR\_2

AT1A1 - ADIGVAMGIVGSDVSK\_2

AT1A3(Non-Unique) - AAVPDAVGK\_2

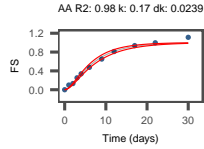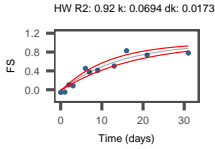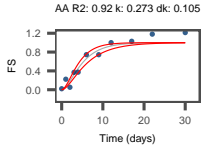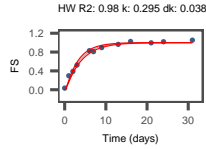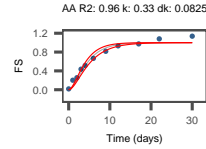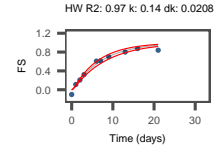

ASSY - NQAPPGLYTK\_2

AT1A1 - ADIGVAMGIVGSDVSK\_3

AT1B1 - AYGENIGYSEK\_2

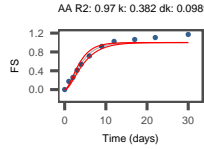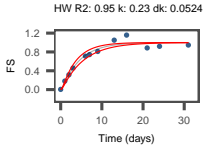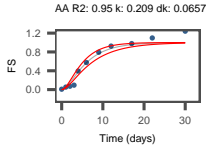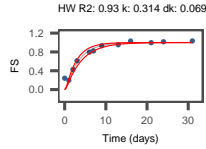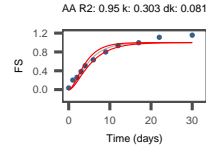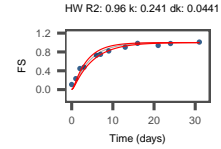

ASSY - QHGIPIPVTPK\_2

AT1A1 - AVAGDASEALLK\_2

AT1B1 - FIWNSEK\_2

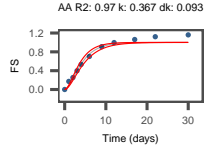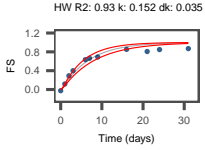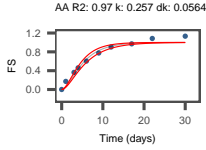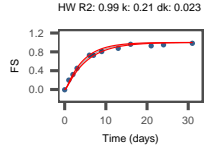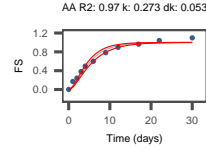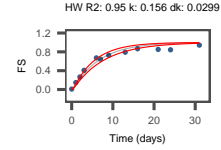

ASSY - QHGIPIPVTPK\_3

AT1A1 - RPGGWEEK\_2

AT1B1 - TEISFRPNDPK\_2

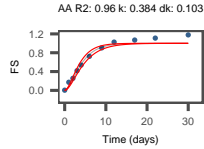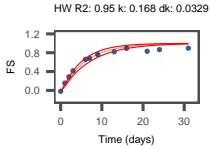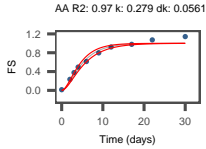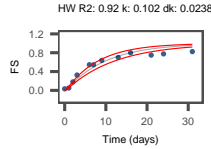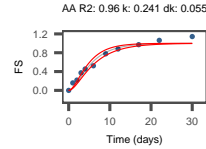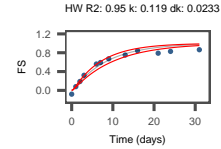

ASSY - TTSLELFMYLNEVAGK\_3

AT1A1 - YEPAVSEHGDK\_3

AT1B1 - VAPPGLTPIQIQK\_2

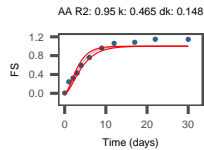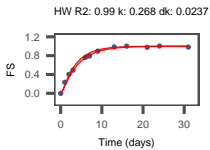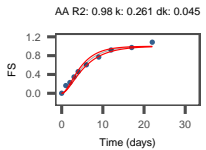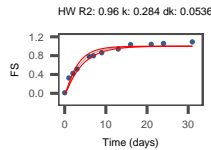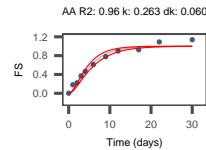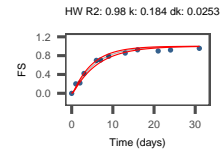

AT1B1 – VAPPGLTQIQPK\_Q3

ATNG – AGEISDLSANSNGSAK\_Q2

ATP5L – LATFWHYAK\_Q3

AA R2: 0.97 k: 0.15 dk: 0.0323

HW R2: 0.98 k: 0.189 dk: 0.0249

AA R2: 0.93 k: 0.85 dk: 0.373

HW R2: 0.97 k: 0.507 dk: 0.0735

AA R2: 0.99 k: 0.108 dk: 0.00897

HW R2: 0.96 k: 0.0799 dk: 0.0134

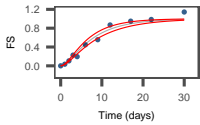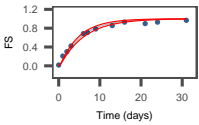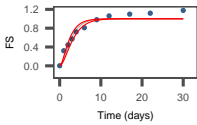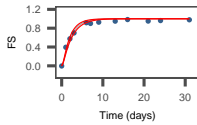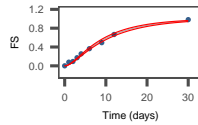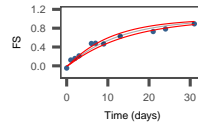

AT2A2(Non-Unique) – VDQSILTGESVSVIK\_Q2

ATP4A(Non-Unique) – VIMVTGDHPITAK\_Q3

ATP5L – VELVPTPAEIPTAQSVK\_Q2

AA R2: 0.97 k: 0.462 dk: 0.107

HW R2: 0.97 k: 0.291 dk: 0.0444

AA R2: 0.93 k: 0.334 dk: 0.105

HW R2: 0.98 k: 0.159 dk: 0.0181

AA R2: 0.99 k: 0.0972 dk: 0.0099

HW R2: 0.99 k: 0.0773 dk: 0.0053

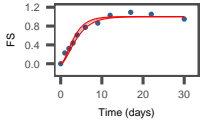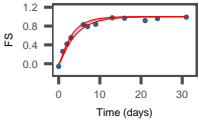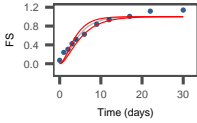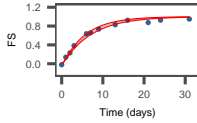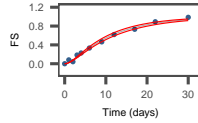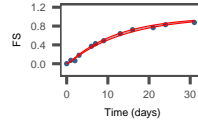

AT5F1 – IAQLIEEVK\_Q2

ATP5H – NIIPQDMTIDDLNEIFPETK\_Q2

ATPA – GMSLNLPEPDNVGVVFGNDK\_Q3

AA R2: 0.93 k: 0.107 dk: 0.0246

HW R2: 0.99 k: 0.082 dk: 0.00602

AA R2: 0.98 k: 0.115 dk: 0.0177

HW R2: 1 k: 0.0897 dk: 0.00475

AA R2: 0.99 k: 0.128 dk: 0.0122

HW R2: 0.99 k: 0.113 dk: 0.00981

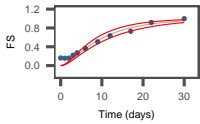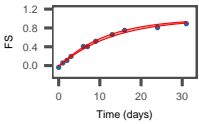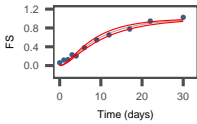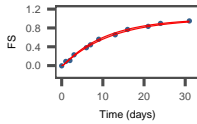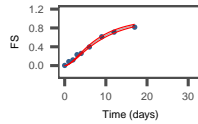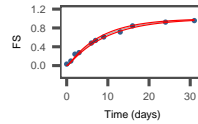

AT5F1 – LGLIPEEFFQFLYPK\_Q2

ATP5H – TIDWVSFVEVMPQNK\_Q3

ATPA – NVQAEEMVEFSSGLK\_Q3

AA R2: 0.98 k: 0.111 dk: 0.017

HW R2: 1 k: 0.0891 dk: 0.00492

AA R2: 0.98 k: 0.0952 dk: 0.0129

HW R2: 0.95 k: 0.0713 dk: 0.0158

AA R2: 0.99 k: 0.0909 dk: 0.00675

HW R2: 0.98 k: 0.107 dk: 0.0133

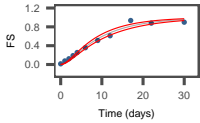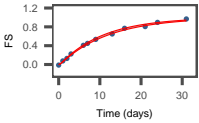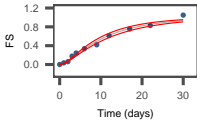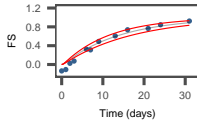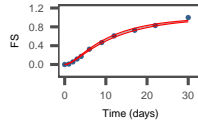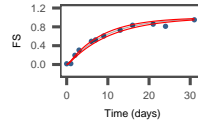

AT5F1 – LGLIPEEFFQFLYPK\_Q3

ATP5I – ELAEAQDSILK\_Q2

ATPA – TSAIDTINQK\_Q2

AA R2: 0.98 k: 0.114 dk: 0.0161

HW R2: 0.99 k: 0.0828 dk: 0.0067

AA R2: 0.99 k: 0.077 dk: 0.00622

HW R2: 0.99 k: 0.085 dk: 0.0075

AA R2: 0.99 k: 0.126 dk: 0.0147

HW R2: 0.97 k: 0.0839 dk: 0.0123

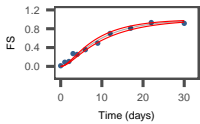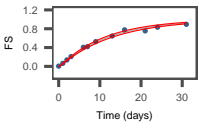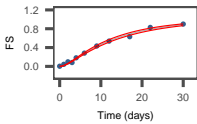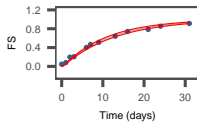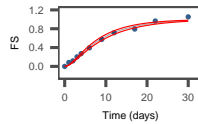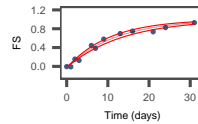

AT5F1 – PLPLPPEYGGK\_Q2

ATP5I – VPPVQSPLIK\_Q2

ATPA – TSAIDTINQK\_Q3

AA R2: 0.94 k: 0.0454 dk: 0.00895

HW R2: 0.93 k: 0.0751 dk: 0.0149

AA R2: 0.99 k: 0.111 dk: 0.0103

HW R2: 0.99 k: 0.0646 dk: 0.0049

AA R2: 0.98 k: 0.118 dk: 0.0156

HW R2: 0.99 k: 0.081 dk: 0.00734

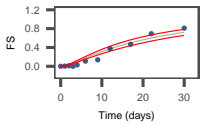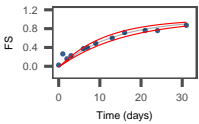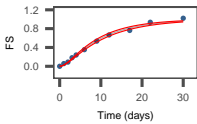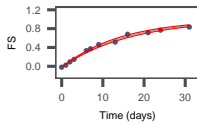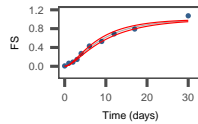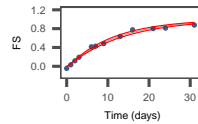

**ATPB – SLQDIIALGMDELSEEDKLTVSR\_2**

**ATPG – VYGTGSLALYEK\_2**

**BIP – IEWLESHQDADIEDFK\_3**

AA R2: 0.91 k: 0.089 dk: 0.0305

HW R2: 0.9 k: 0.173 dk: 0.0618

AA R2: 0.99 k: 0.104 dk: 0.00921

HW R2: 0.95 k: 0.112 dk: 0.0211

AA R2: 0.95 k: 0.467 dk: 0.158

HW R2: 0.96 k: 0.313 dk: 0.0648

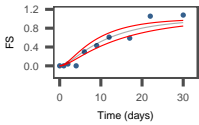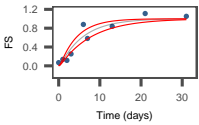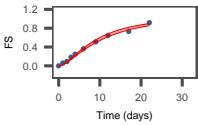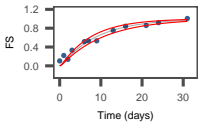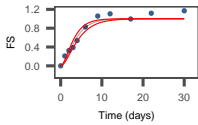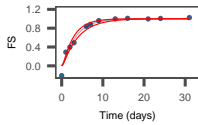

**ATPB – TVLIMELINNAK\_2**

**ATPO – GEVPTVTASPLDDAVLSELK\_2**

**BIP – SQIFSTASDNQPTVTIK\_2**

AA R2: 0.95 k: 0.106 dk: 0.0264

HW R2: 0.94 k: 0.122 dk: 0.0269

AA R2: 0.91 k: 0.0949 dk: 0.0237

HW R2: 0.99 k: 0.0844 dk: 0.0064

AA R2: 0.94 k: 0.369 dk: 0.135

HW R2: 0.94 k: 0.286 dk: 0.0592

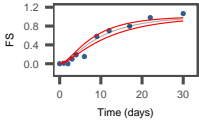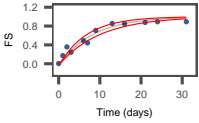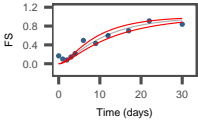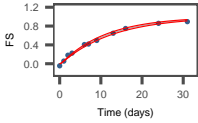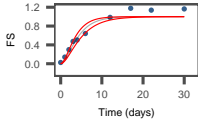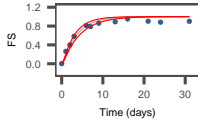

**ATPD – IEANEALVK\_2**

**ATPO – SFLSPNQILK\_2**

**BPHL – QVSLLGWSDGGITALIAAAK\_2**

AA R2: 0.94 k: 0.0833 dk: 0.0168

HW R2: 1 k: 0.0892 dk: 0.00491

AA R2: 0.99 k: 0.105 dk: 0.0095

HW R2: 0.97 k: 0.0714 dk: 0.0098

AA R2: 0.96 k: 0.15 dk: 0.0339

HW R2: 0.99 k: 0.127 dk: 0.00933

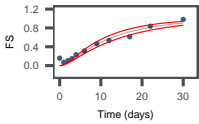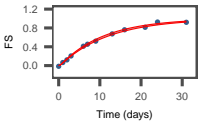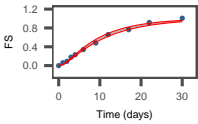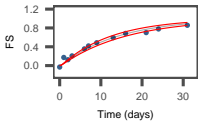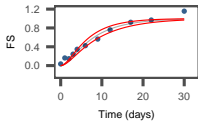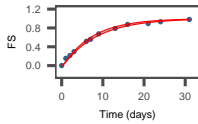

**ATPD – PGLVVVHTEDGTTTK\_3**

**AUHM – DRLEGLLAFK\_3**

**BPHL – TDFAPQLQSLNK\_2**

AA R2: 0.98 k: 0.11 dk: 0.0149

HW R2: 0.97 k: 0.107 dk: 0.017

AA R2: 0.99 k: 0.0963 dk: 0.00837

HW R2: 0.97 k: 0.0883 dk: 0.0155

AA R2: 0.99 k: 0.131 dk: 0.016

HW R2: 0.99 k: 0.128 dk: 0.00904

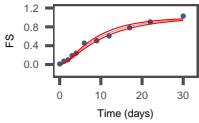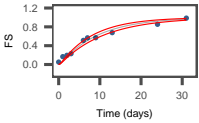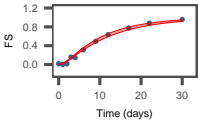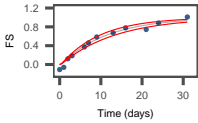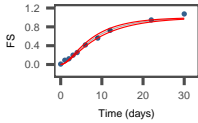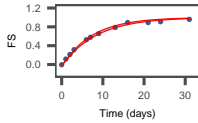

**ATPG – THSDQLVFSK\_2**

**BDH – MQIMTHFGAISDK\_3**

**BPHL – VGEGEHAILLLPGLMGSGK\_2**

AA R2: 0.98 k: 0.104 dk: 0.0131

HW R2: 0.98 k: 0.0896 dk: 0.0099

AA R2: 0.98 k: 0.106 dk: 0.0137

HW R2: 0.98 k: 0.0745 dk: 0.0090

AA R2: 0.95 k: 0.156 dk: 0.0426

HW R2: 0.95 k: 0.0616 dk: 0.0123

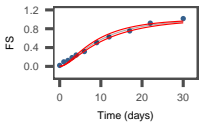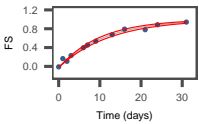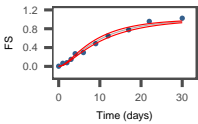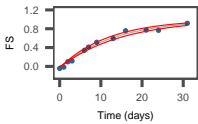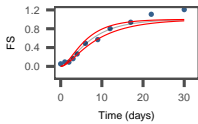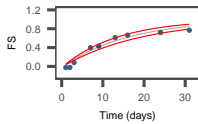

**ATPG – THSDQLVFSK\_3**

**BDH2 – AAVIGLTK\_2**

**BPHL – VGEGEHAILLLPGLMGSGK\_3**

AA R2: 0.99 k: 0.106 dk: 0.0119

HW R2: 1 k: 0.089 dk: 0.00404

AA R2: 0.98 k: 0.281 dk: 0.0452

HW R2: 0.99 k: 0.185 dk: 0.019

AA R2: 0.98 k: 0.155 dk: 0.0225

HW R2: 0.99 k: 0.116 dk: 0.00823

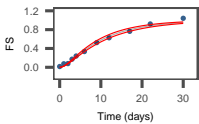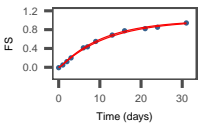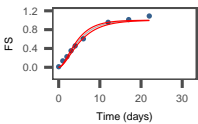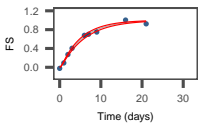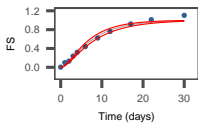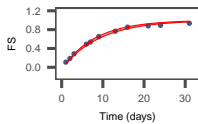





CATA - ASQRPDVLTGGGNPIGDK\_2

CBR1 - VNDTTFPHIQAEVTMK\_3

CH10 - VLQATVVAVGSGGK\_2

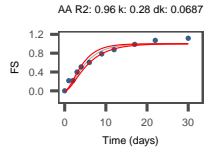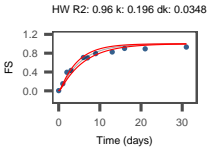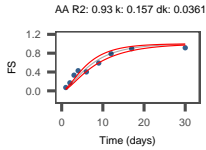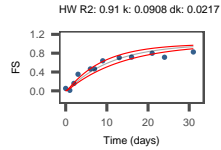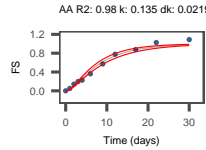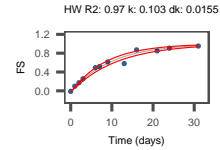

CATA - DAILFPSFIHSQK\_2

CBR4 - TMIQQGGSIVNVGSIIGLK\_2

CH10 - VVLDDKDYFLFR\_3

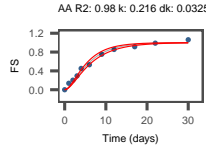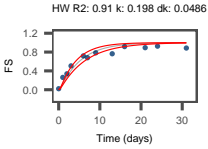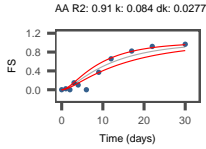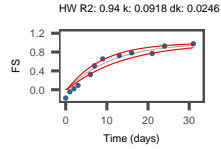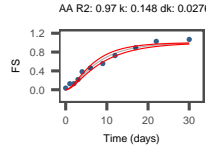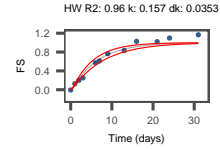

CATA - DAILFPSFIHSQK\_3

CDC42 - NVFDEAILAALPEPEPK\_2

CH60(Non-Unique) - GIIDPTK\_2

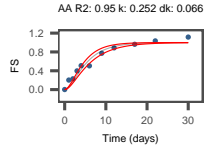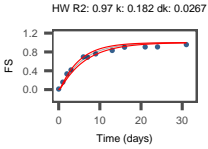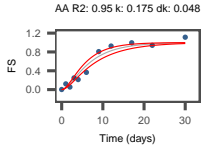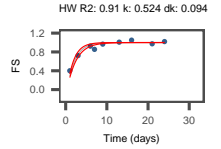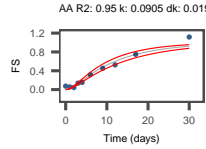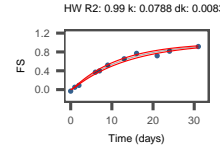

CATA - EAETFPNPFDLTK\_2

CDC42 - NVFDEAILAALPEPEPK\_3

CH60 - GVMILAVDAVIAELK\_2

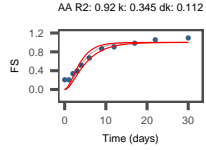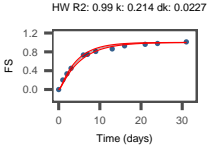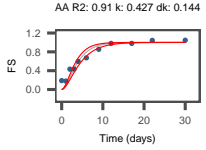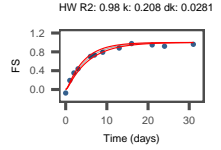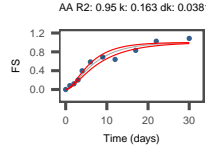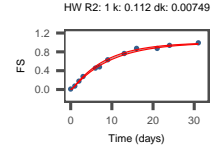

CATA - LVNADGEAVYCK\_2

CENPV - AGAGGGGAVQPQPSAK\_2

CH60 - GVMILAVDAVIAELK\_3

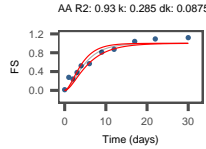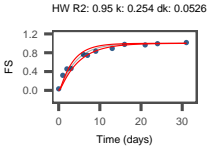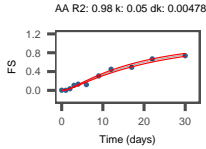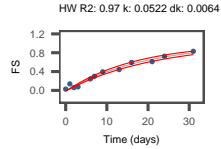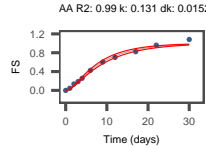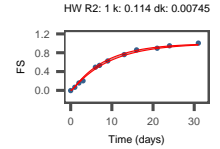

CATA\_HUMAN,sp|P24270|CATA(Non-Unique) - DYPLIPVGK\_2

CGL - AVVLPISLATTFK\_2

CH60 - IGIIEIK\_2

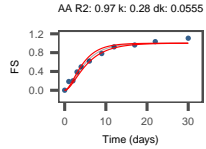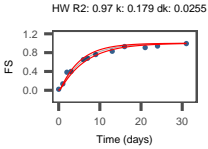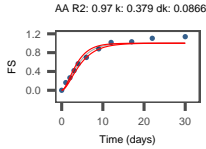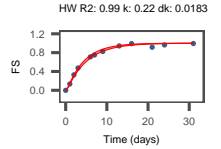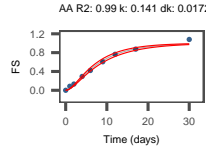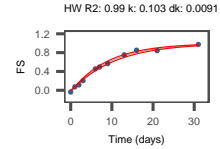



CLH1 - NLQNLLILTAIK\_3

CLIC1 - LAALNPESNTSGLDIFAK\_2

CMBL - NLIEWLNK\_2

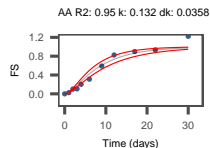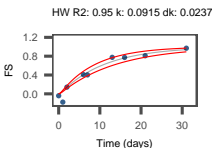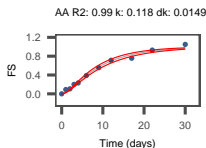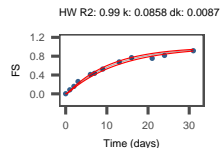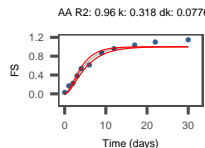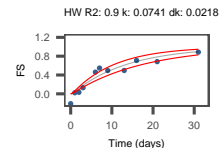

CLH1 - RPISADSAIMNPASK\_2

CLTRN - INSAFFLDDHTLEFLK\_3

CMC1 - FTLGSVAGAVGATAVYPIDLVK\_3

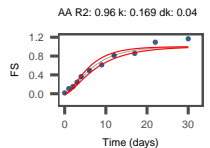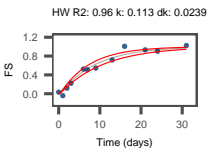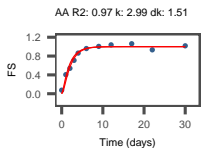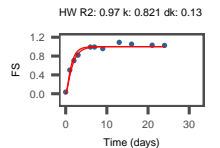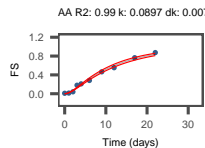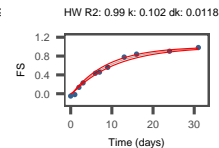

CLH1 - RPISADSAIMNPASK\_3

CLYBL - GSMIDMPLLK\_2

CMC1(Non-Unique) - GLIPQLIGVAPEK\_2

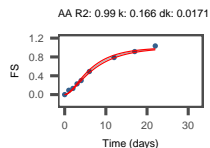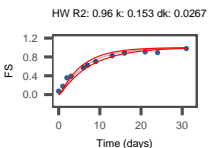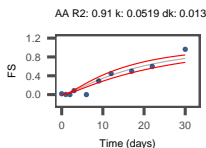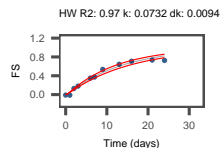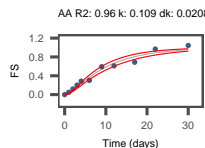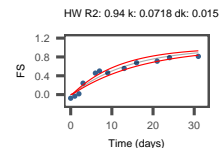

CLH1 - RPLIDQVVQTALSETQDPEEVSVTVK\_3

CLYBL - IQWAEELIAAFK\_2

CMC1 - IVQLLAGVADQTK\_2

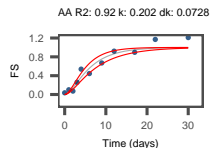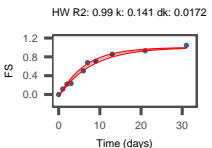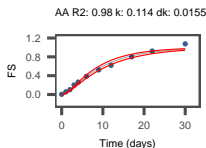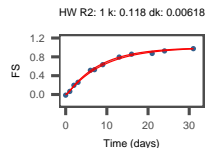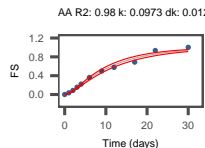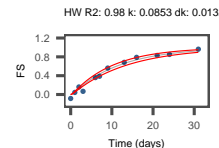

CLH1 - TLQIFNIEMK\_2

CLYBL - QAQNVTLATSIIK\_2

CMC1 - VGGINLLTAGALAGVPAASLVPADVIK\_3

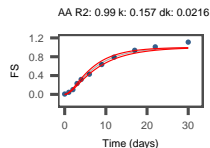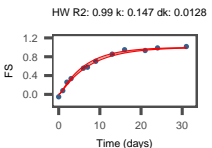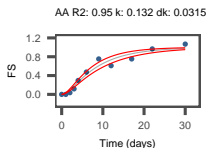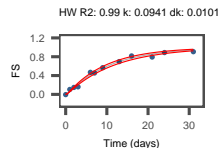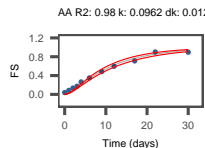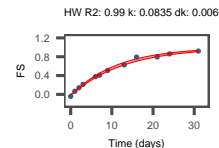

CLH1 - YHEQLSTQSLIELFESFK\_3

CLYBL - QIAVVQEQTPTPEK\_2

CMC2 - DLGFFGIYK\_2

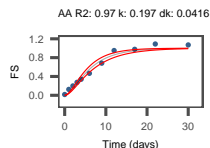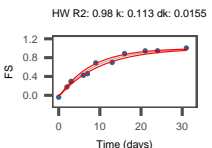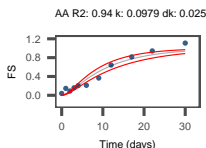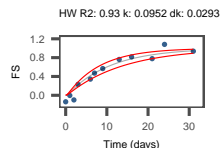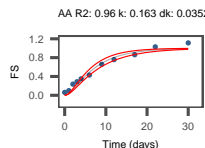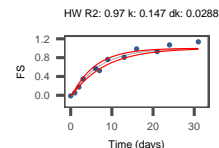

CMC2 – FGLGSIAGAVGATAVPIDLVK\_2

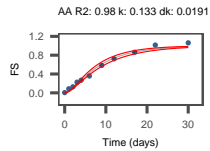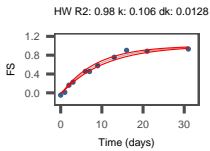

CNDP2 – LVPDMPEVSEQVSSYLSK\_3

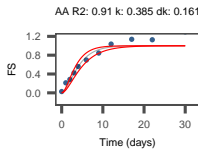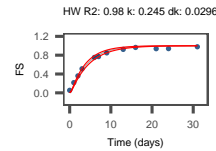

COMT – VSILIGASQDLIPQLK\_2

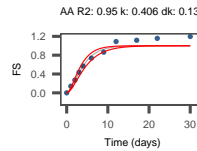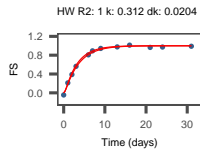

CMC2 – FGLGSIAGAVGATAVPIDLVK\_3

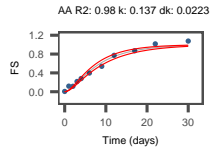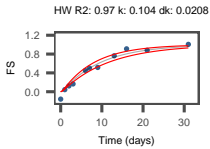

CNDP2 – MLAAYLYEVSQLK\_2

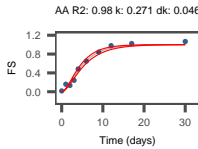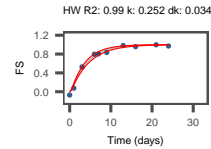

COPB2 – HSEVQQANLK\_2

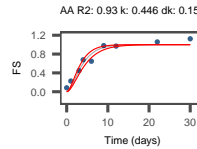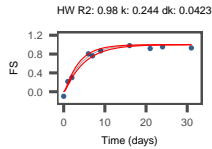

CMC2 – ITLPAPNDPHVGGYK\_2

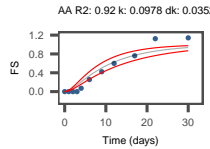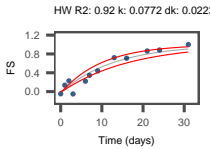

CNDP2 – MLAAYLYEVSQLK\_3

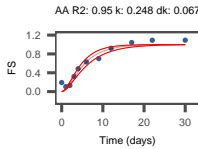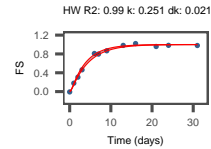

COPB2 – VWLQSSSPNFTLEGHEK\_3

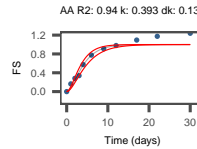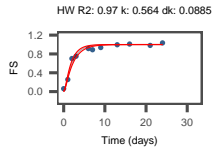

CMC2 – ITLPAPNDPHVGGYK\_3

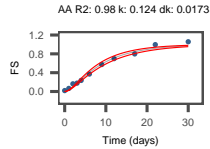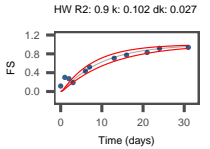

CNDP2 – NVMLLPVGSADGSAHSQNEK\_3

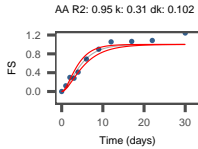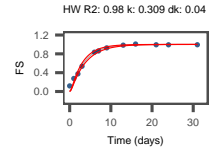

COPG2(Non-Unique) – SIATLAITLLK\_2

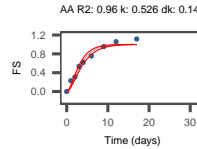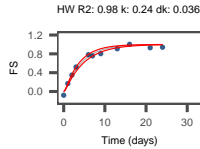

CNDP2 – LGGSELVDIGK\_2

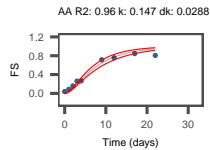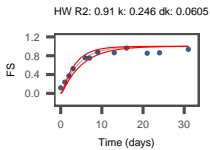

COASY – AYAPGGPAYQPVEAFGTDILHK\_3

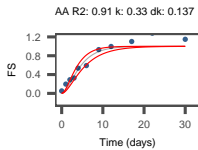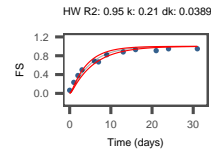

COQ9 – LVQLGQAEK\_2

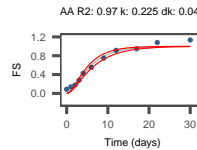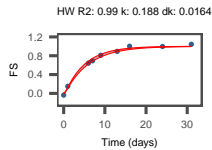

CNDP2 – LVPDMPEVSEQVSSYLSK\_2

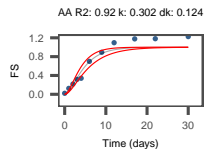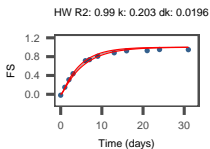

COASY – ILTDIWPVIK\_2

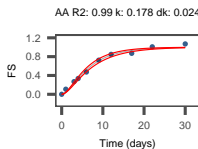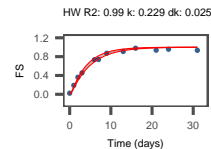

COX2 – MLISSEDLHSAWVPSLGLK\_2

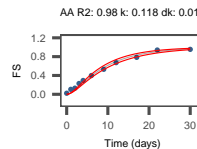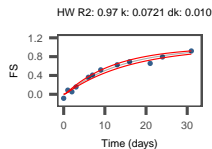

COX41 – DYPLPDVAHVMTLSASQK\_2

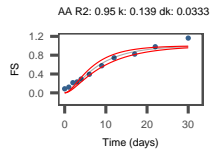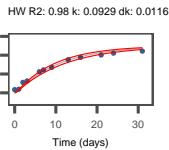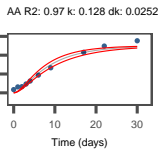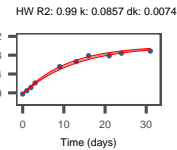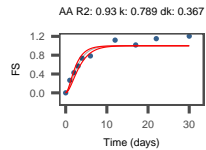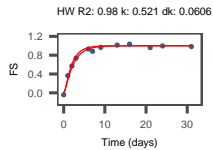

COX41 – DYPLPDVAHVMTLSASQK\_3

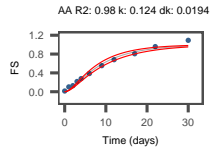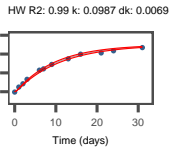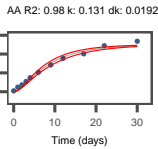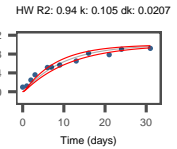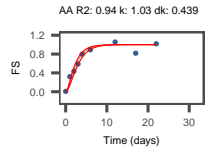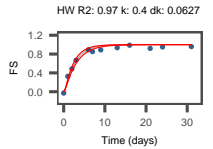

COX5A – GMNTLVGYDLVPEPK\_2

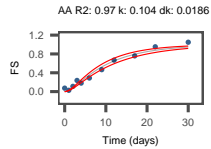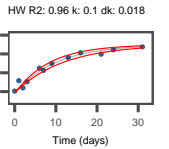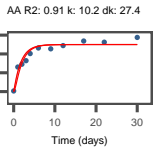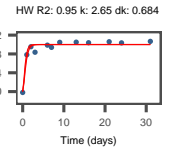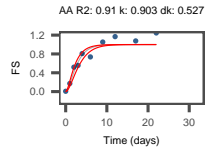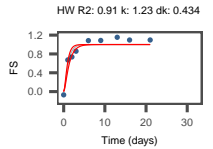

COX5A – NKPIDIDAWELR\_3

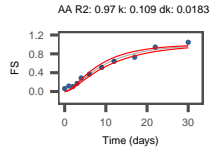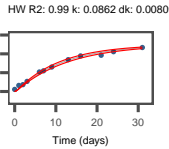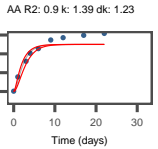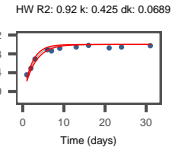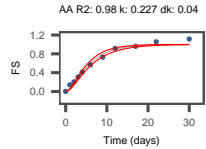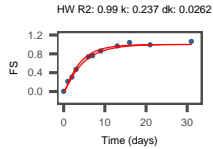

COX5A – VIQLRPTLNLGISTPEELGLDKV\_3

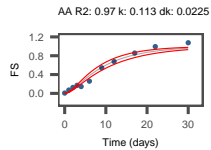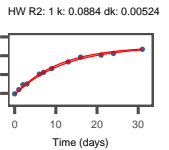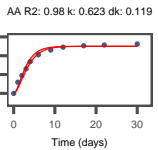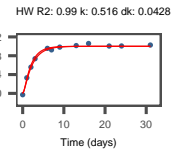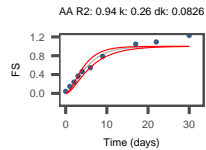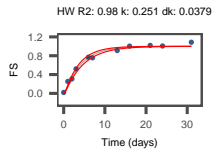

COX5B – EDPNLVPSISNK\_2

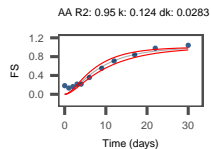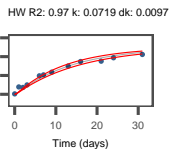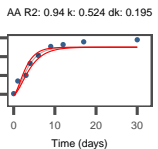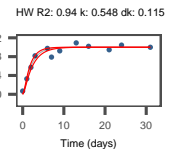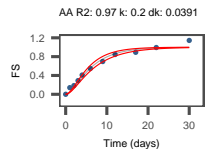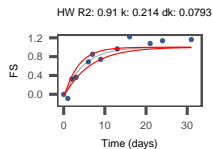

COX5B – EIMIAAQK\_2

COX6C – AGIFQSAK\_2

CP4B1 – NCIGQQFAMNEMK\_2

CP4B1 – QLSKPVTFVDGR\_3

CP2A4(Non-Unique) – GEQATFDWLFK\_2

CP51A – EPAEDILQTLDDSTYK\_3

CP4B1 – FEFSPDPSK\_2

CPT1A – IPGEETDIQHVK\_3

CP4B1 – GLLVLEGPK\_2

CPT1A – LSTSQTQQQVELDFEJK\_2

CP4B1 – HWLFGHALEIQK\_3

CPT1A – SITFVVKF\_2



DHB5(Non-Unique) – REDIFYTSK\_2

DHPR – MTDSFTEQADQVTDVKG\_2

DHSO – LENYPIPELPGNDVLLK\_2

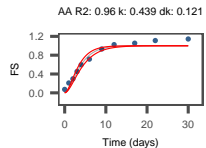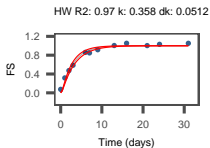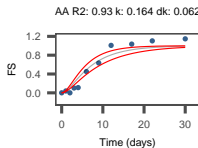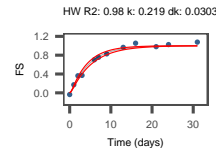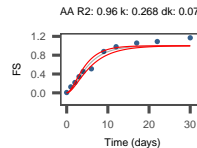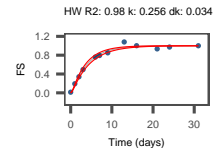

DHE3 – LQHGSILGFPK\_3

DHRS4 – FGNLMDVTEEVWDK\_2

DHTK1 – YGGEAESMMGFFHELLK\_3

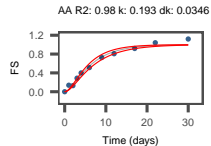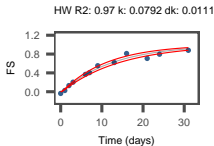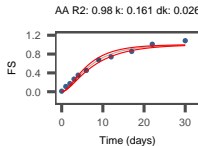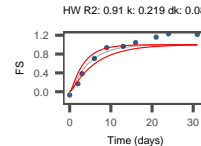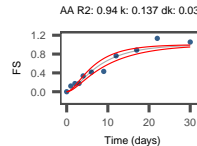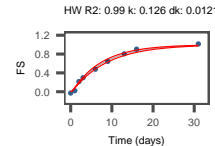

DHE3 – VYEGSILEADCILIPAASEK\_2

DHRS4 – TALLGLTK\_2

DIC – GEYQGVFHCAMETAK\_3

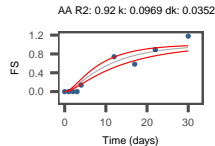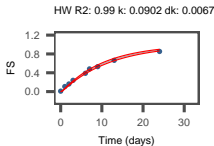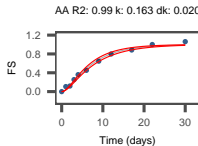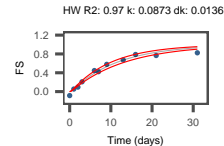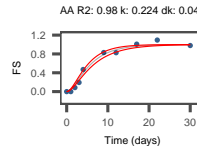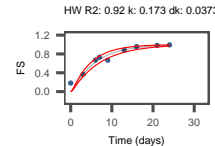

DHE3\_BOVIN,sp[P26443]DHE3(Non-Unique) – NYTDNELEK\_2

DHRS4 – VNCLAPGLIK\_2

DIC – VHLTQQEVK\_2

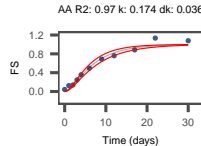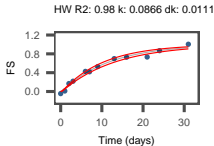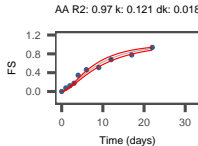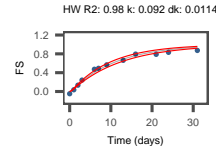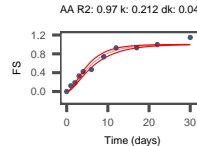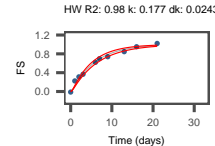

DHE3\_BOVIN,sp[P26443]DHE3(Non-Unique) – SEAAADREDDPNFFK\_2

DHSO – AVEAFETAK\_2

DIC – VHLTQQEVK\_3

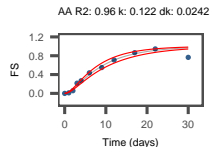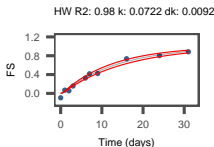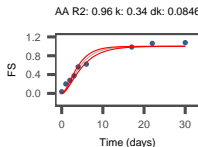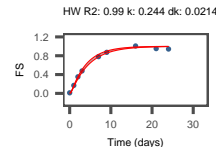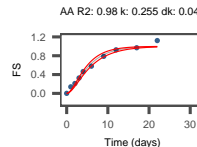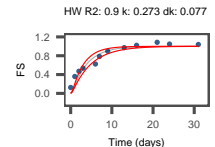

DHE3\_BOVIN,sp[P26443]DHE3(Non-Unique) – TAAYVNAIEK\_2

DHSO – ETPQEIA SK\_2

DLDH – ADGTSQVIDTK\_2

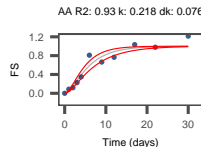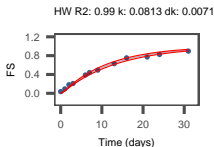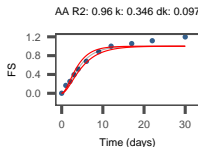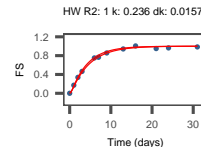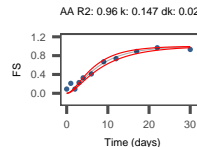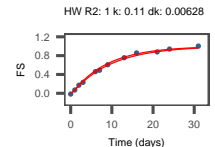

**DLDH – ADQPIEADTVIGSGPGGYVAAIK\_2**

**DPEP1 – LAQHTNIPK\_2**

**ECHA – LPAKPEVSSDEDVQYR\_3**

AA R2: 0.94 k: 0.0932 dk: 0.0255

HW R2: 1 k: 0.0884 dk: 0.00544

AA R2: 0.99 k: 0.0742 dk: 0.00772

HW R2: 0.99 k: 0.0488 dk: 0.0035

AA R2: 0.98 k: 0.101 dk: 0.0146

HW R2: 0.96 k: 0.0907 dk: 0.0149

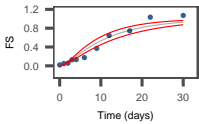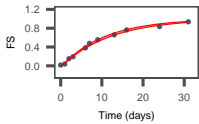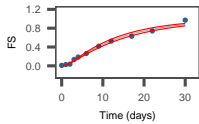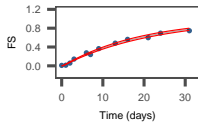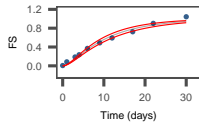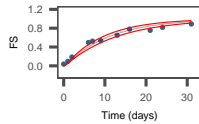

**DLDH – ADQPIEADTVIGSGPGGYVAAIK\_3**

**DPEP1 – LAQHTNIPK\_3**

**ECHA – MGLVDQLVEPLGPIK\_2**

AA R2: 0.91 k: 0.0634 dk: 0.0181

HW R2: 0.94 k: 0.108 dk: 0.0198

AA R2: 0.97 k: 0.0878 dk: 0.0107

HW R2: 0.96 k: 0.0527 dk: 0.0068

AA R2: 0.94 k: 0.0774 dk: 0.0204

HW R2: 0.99 k: 0.101 dk: 0.0104

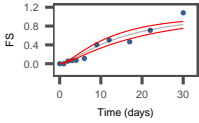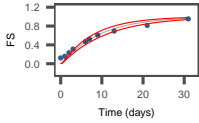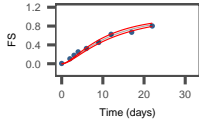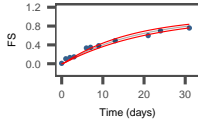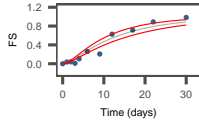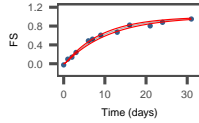

**DLDH – ALTGGIAHLFK\_2**

**DX39A(Non-Unique) – DFLKPELLR\_3**

**ECHA – MGLVDQLVEPLGPIK\_3**

AA R2: 0.98 k: 0.0939 dk: 0.0129

HW R2: 0.93 k: 0.0934 dk: 0.028

AA R2: 0.98 k: 0.197 dk: 0.03

HW R2: 0.94 k: 0.086 dk: 0.0192

AA R2: 0.99 k: 0.107 dk: 0.0126

HW R2: 0.99 k: 0.0918 dk: 0.0083

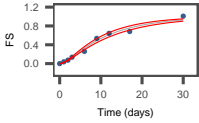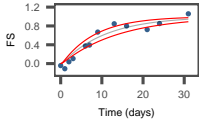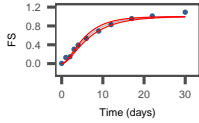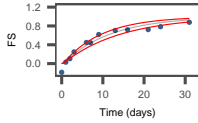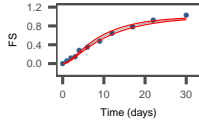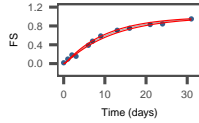

**DLDH – ALTGGIAHLFK\_3**

**ECHA – ADMVIEAVFEDLGVK\_2**

**ECHA – MQLLEIITDK\_2**

AA R2: 0.99 k: 0.114 dk: 0.0132

HW R2: 0.99 k: 0.0863 dk: 0.0055

AA R2: 0.92 k: 0.124 dk: 0.0345

HW R2: 0.99 k: 0.113 dk: 0.00834

AA R2: 0.96 k: 0.0774 dk: 0.0143

HW R2: 0.96 k: 0.152 dk: 0.0275

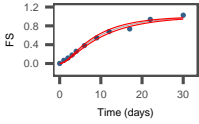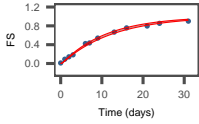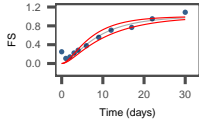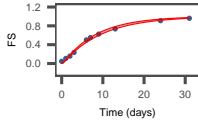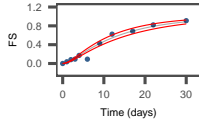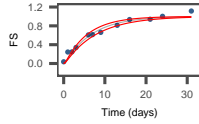

**DLDH – IPNIYAIGDVVAGPMLAHK\_3**

**ECHA – AGLEQSGDAGYLAESQK\_2**

**ECHA – NVQQLAILGAGLGMAGIAQVSDK\_2**

AA R2: 0.96 k: 0.112 dk: 0.0212

HW R2: 0.99 k: 0.081 dk: 0.00714

AA R2: 0.96 k: 0.122 dk: 0.0246

HW R2: 0.98 k: 0.101 dk: 0.0128

AA R2: 0.98 k: 0.11 dk: 0.0178

HW R2: 0.95 k: 0.129 dk: 0.0321

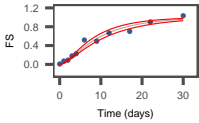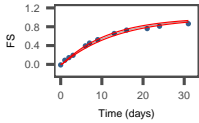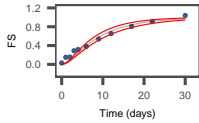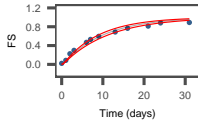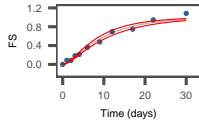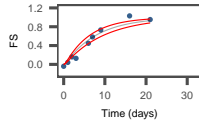

**DLDH – RPFTQNLGLEELGIEDPK\_3**

**ECHA – FGELALTK\_2**

**ECHA – NVQQLAILGAGLGMAGIAQVSDK\_3**

AA R2: 0.98 k: 0.107 dk: 0.0153

HW R2: 0.99 k: 0.0975 dk: 0.0063

AA R2: 0.98 k: 0.099 dk: 0.0121

HW R2: 0.99 k: 0.0804 dk: 0.0080

AA R2: 0.93 k: 0.114 dk: 0.0332

HW R2: 0.95 k: 0.101 dk: 0.0177

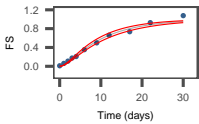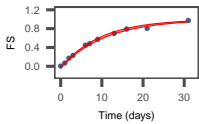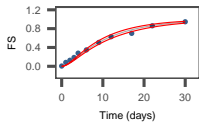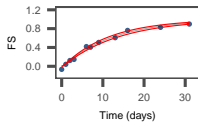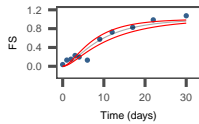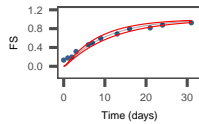





EC11 - ALQLGLTSPAEALK\_2

EF1A1(Non-Unique) - STTTGHLIYK\_2

EFTU - TTLTAATK\_2

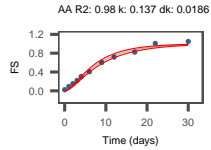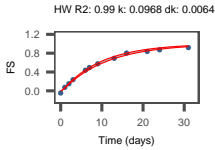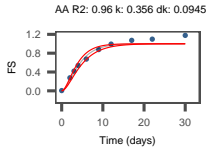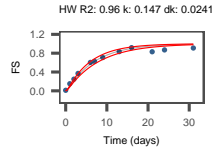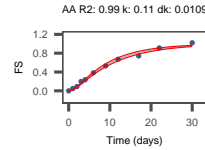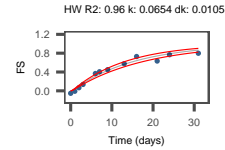

EC11 - VLVETEGPAGVAVMK\_2

EF1G - ILGLDTHLK\_3

EM55 - FVTGDIQINK\_2

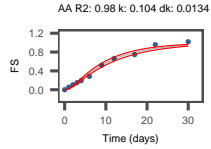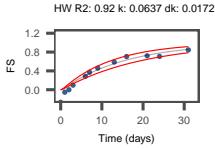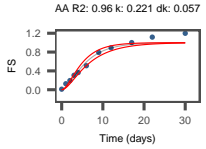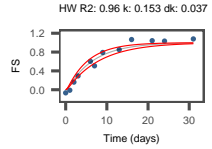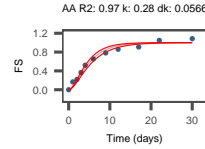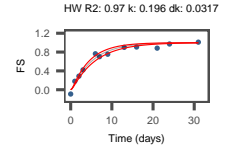

ECSIT - DLSVYNLLLDVFPK\_2

EF2 - VFSGVSTGLK\_2

EM55 - IALDIEPQTLK\_2

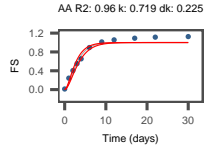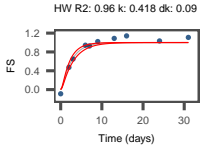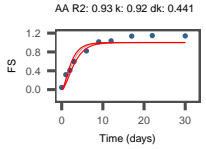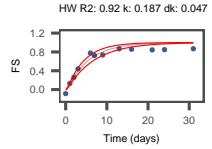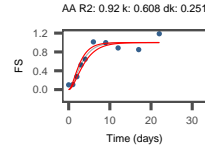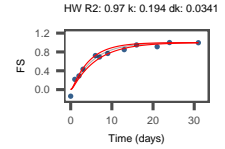

EF1A1 - MDSTEPYSQK\_2

EFTU - DLDKPFLLPVESYSIGR\_3

ENOA(Non-Unique) - AILGVS LAVCK\_2

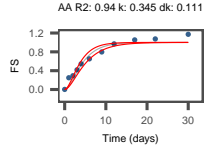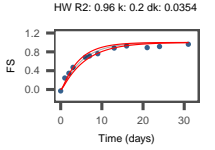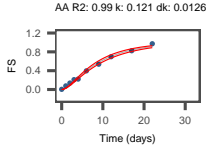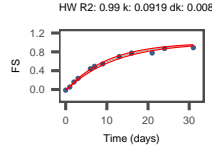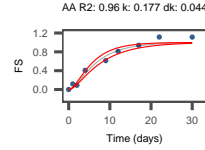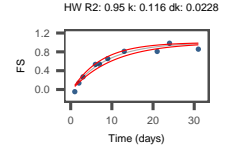

EF1A1(Non-Unique) - QLIVGVNK\_2

EFTU - ELAMPGEDLK\_2

ENOA - FTASAGIQVGGDLTLVTNPK\_3

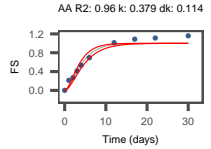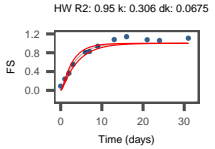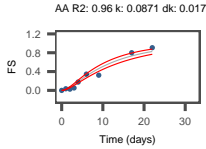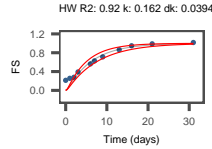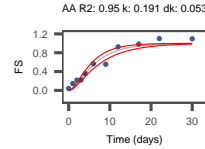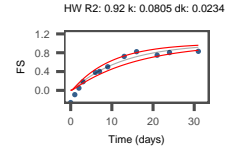

EF1A1 - RYEEIVK\_2

EFTU - QIGVEHVVVYVK\_2

ENOA(Non-Unique) - GNPTVEVDLYTAK\_2

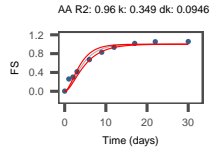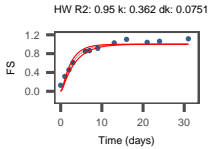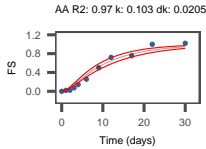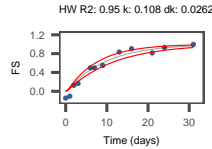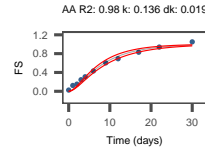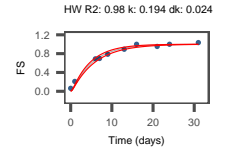

ENOA – GVSQAVEHINK\_2

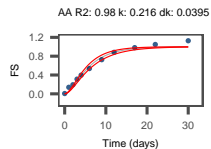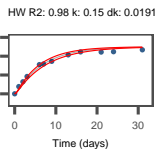

ENPL – TVWDWELMNDIKPIWQR\_3

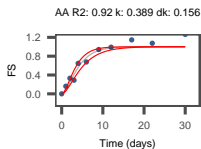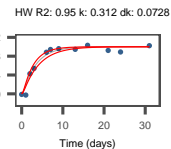

EST1D – ESYFPLTVDIGVVLPK\_2

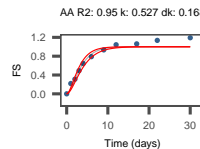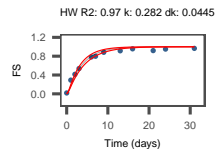

ENOA – SFVQNPVVSIEDPFDQDDWGAWQK\_2

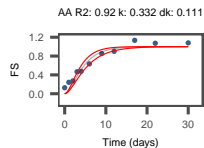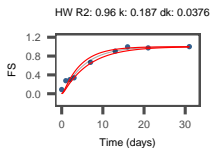

ENPP3 – ITLLQLWLDLPK\_2

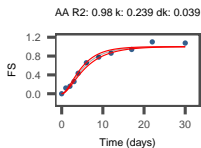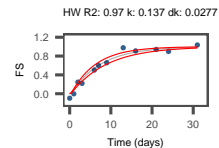

EST1D – QEFGWIPTLMGYPLAEGK\_2

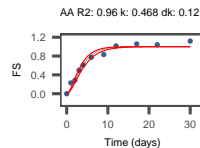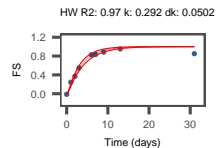

ENOA – SFVQNPVVSIEDPFDQDDWGAWQK\_3

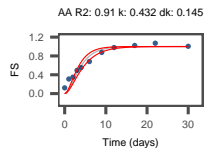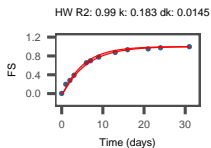

ENTP5 – AQALLLEVEEIFK\_2

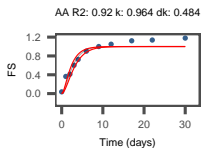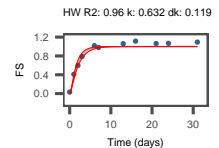

EST1D – QEFGWIPTLMGYPLAEGK\_3

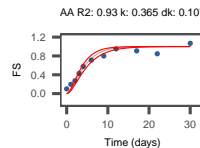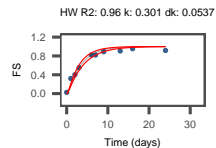

ENOA(Non-Unique) – SGETEDTADIADLVGLGTGQIK\_3

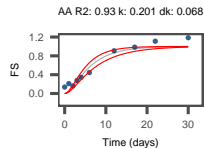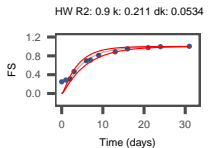

ENTP5 – WLEAEWIFGGVK\_2

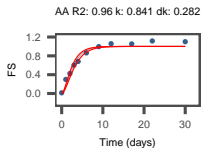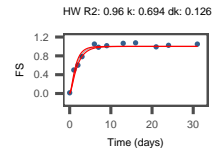

EST1E(Non-Unique) – FAPPQPAEPWSSVK\_2

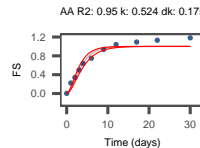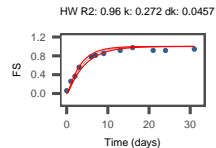

ENOA(Non-Unique) – VNQIGSVTESLQACK\_2

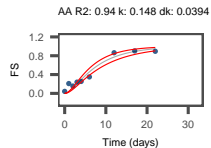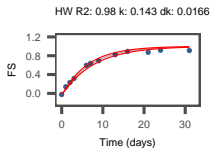

EST1(Non-Unique) – EGASEEINLSK\_2

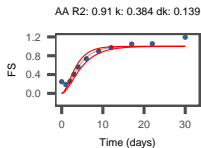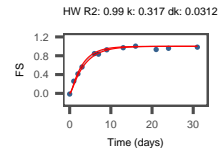

EST1F – AIALLEQFASMTGIPEDIIPVAEK\_2

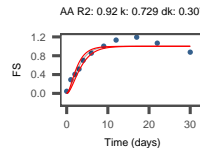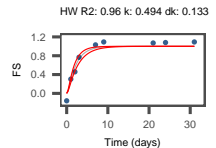

ENOA – YITPDQLADLYK\_2

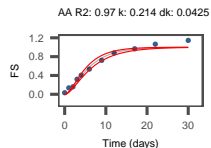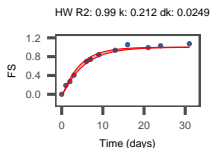

EST1D – AVIGDHGDEIFSVFGSPFLK\_3

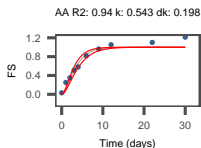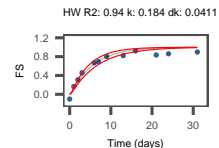

EST1F – AIALLEQFASMTGIPEDIIPVAEK\_3

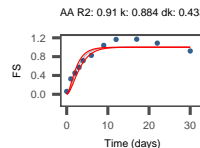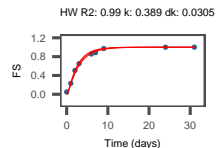



ETFD - FAILTEK\_2

EZRI - SQEQLAAELAEYAK\_2

FAAA - DIQWEYVPLGPFLGK\_2

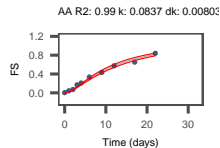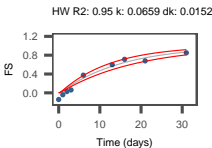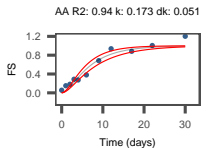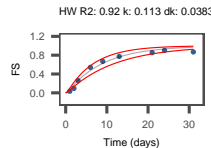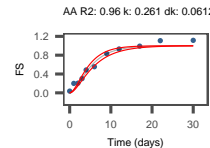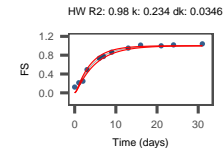

ETFD - HHPSIQPTLEGGK\_3

F16P1 - GNIYSLNEGAYK\_2

FAAA - DIQWEYVPLGPFLGK\_3

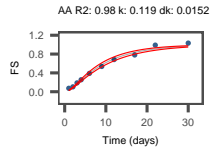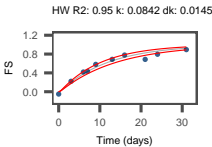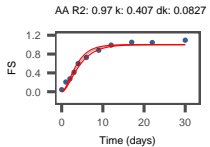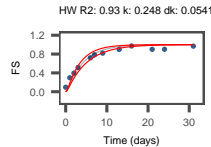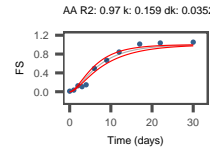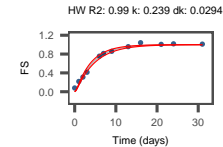

EZRI - EVWYFGLQYVDNK\_2

F16P1 - LDILSNDLVNMLK\_2

FAAA - HLFTGPALSK\_2

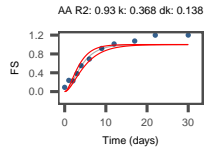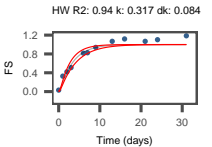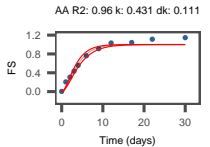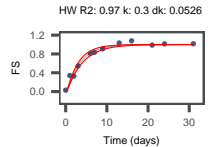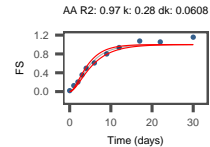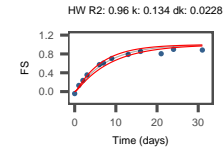

EZRI - FYPEDVAELIQDITQK\_3

F16P1 - LDILSNDLVNMLK\_3

FAAA - HQHVDETTLNNFMGLGQAAWK\_4

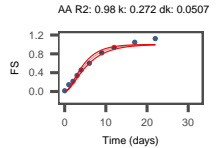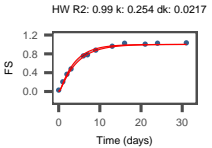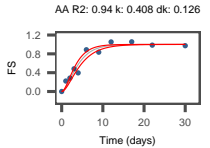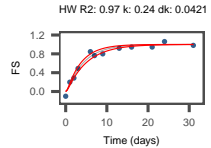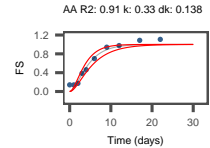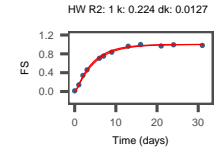

EZRI - GTDLWLGVLDLGLNIYEK\_2

F16P1 - QAGIAQLYIAGSTNVTGDQVK\_2

FABP4 - LVSENFDDYMK\_2

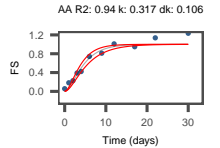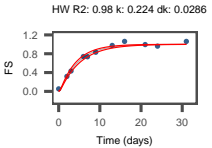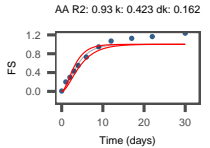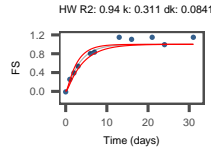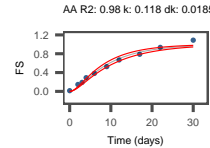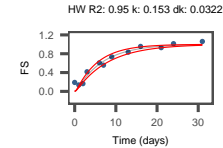

EZRI - RKEDEVVEWQHR\_4

F16P1 - TLVYGIFLYPANK\_2

FAHD1 - IITLEEGDLILTGTPK\_2

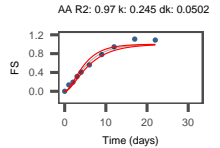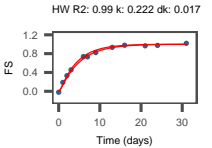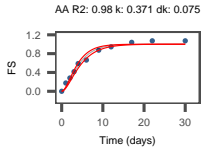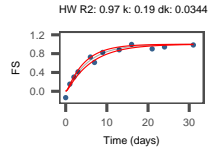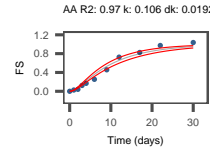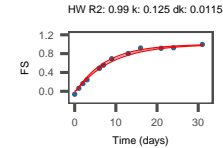

**FAHD2 – FSSIVGYPDEILLPESK\_2**

**FIS1 – GLLQTEPQNQAK\_2**

**FLNB(Non-Unique) – LIALLEVLQSK\_3**

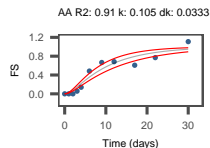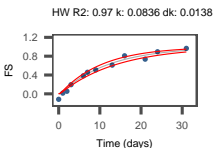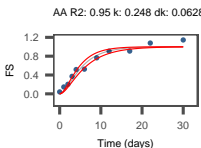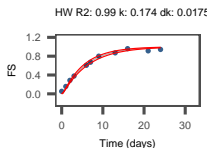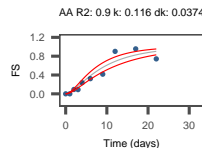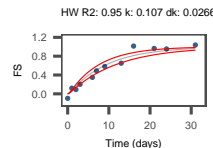

**FERM2 – TMASSYNLEVNILSFLK\_2**

**FLNA – GAGTGGGLGAVGEPSEAK\_2**

**FMO1 – NLLPTPIVSWLISK\_2**

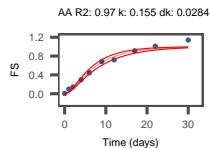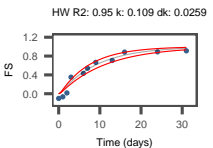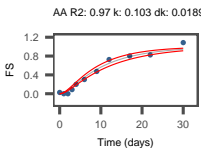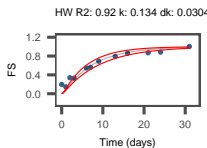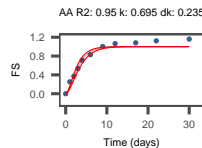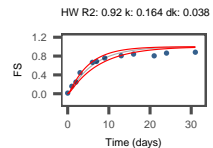

**FHL1 – FTAVEDQYYVCDCYK\_2**

**FLNA – VTAQGPGLPEPSGNIANK\_2**

**FMO1 – VAIVGAGVGLASIK\_2**

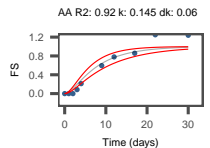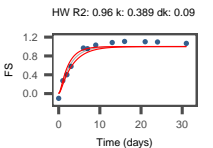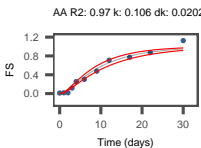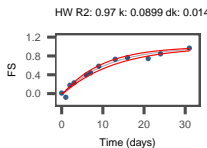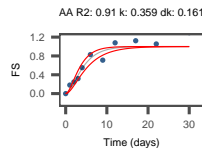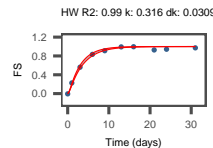

**FIBA – QLQQVIK\_2**

**FLNB(Non-Unique) – EAGAGLSIAGVGPSK\_2**

**FMO4 – VAVIGAGVGLSSIK\_2**

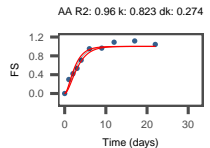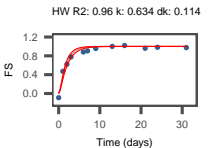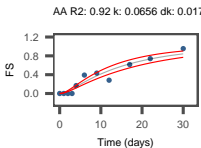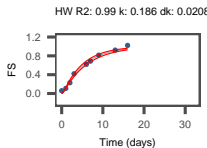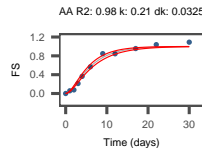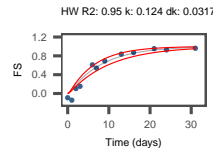

**FIBG – SSTTNGFDGGIATWK\_2**

**FLNB – GAGIGGLGITVEGPSESK\_2**

**FMO5 – ILAGLVK\_2**

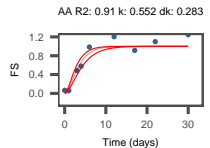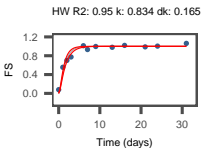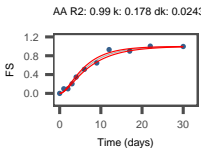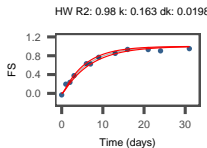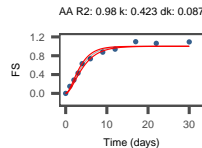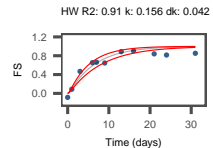

**FIS1 – GIVLLELLPK\_2**

**FLNB(Non-Unique) – LIALLEVLQSK\_2**

**FOLH1 – GMILYSDPADYFVPAVK\_2**

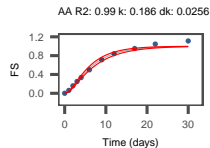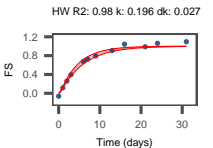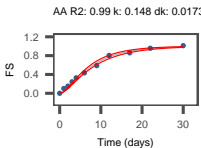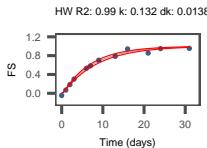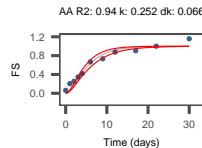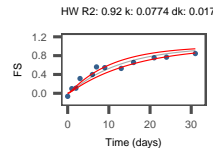

**FOLH1 – YAGESFPPIYDALFDISSK\_2**

**FUMH – VEFDTFGELK\_2**

**G3P – VIHDFNGIVEGLMTTVHAITATQK\_4**

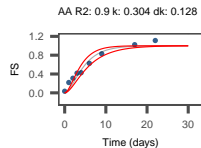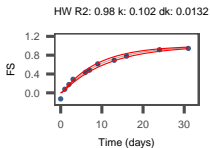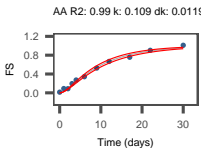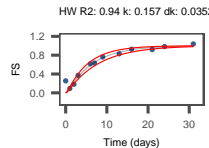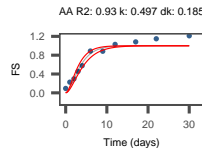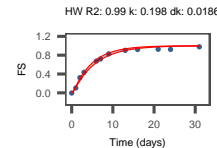

**FUMH – AAAEVNQEYGLDPK\_2**

**FUMH – VLLPGLQK\_2**

**G3P – VIISAPSADAPMFVMGVNHEK\_2**

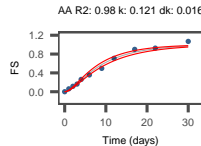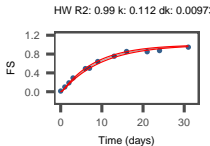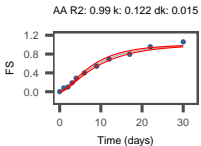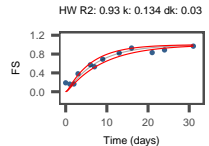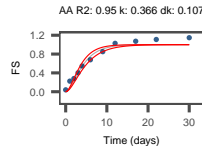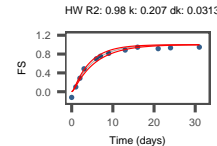

**FUMH – FEALAAHDALVELSGAMNTAACSLMK\_3**

**G3P – GAAQNIIPASTGAAK\_2**

**G3P – WGEAGAAYVVESTGVFTTMEK\_2**

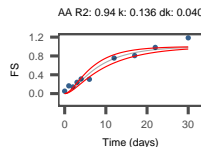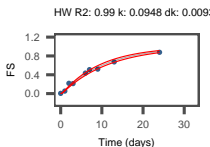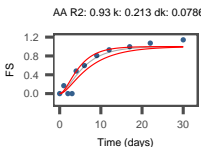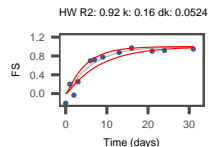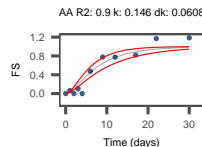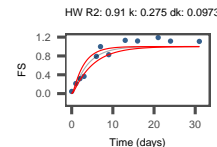

**FUMH – LHDALSAK\_2**

**G3P – MFQYDSTHGK\_2**

**G6PI – EVMQMLVELAK\_2**

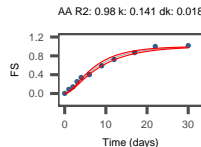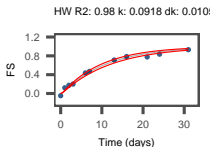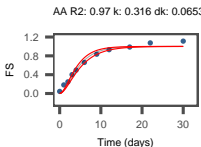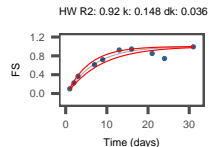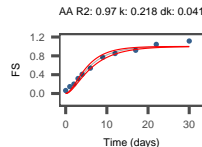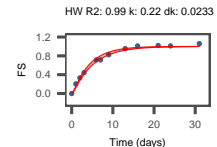

**FUMH – SQSSNDFTPTAMHIAAAVEVHK\_4**

**G3P – MFQYDSTHGK\_3**

**G6PI – EWFLEAAK\_2**

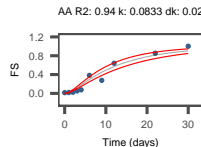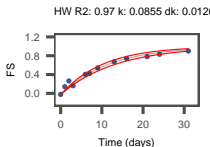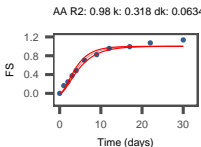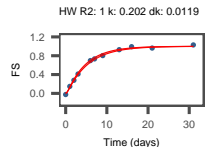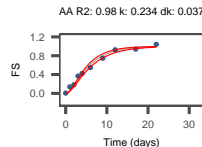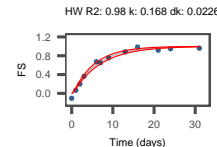

**FUMH – VAALTGLPVTAPNK\_2**

**G3P – SSTFDAGAGIALNDNFVK\_2**

**G6PI – FAAYFQQGDMESNGK\_2**

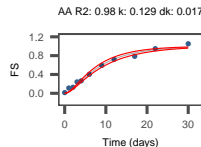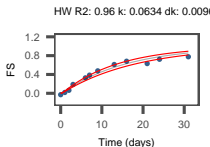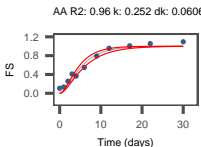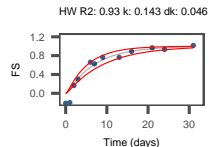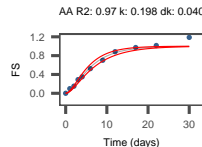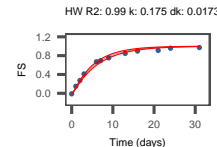

G6PI - HFVALSTNTAK\_2

GABT - NLLLAEVINIUK\_2

GAS2 - EDLALWLTLNLLGK\_2

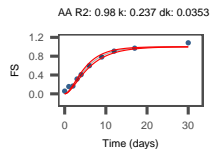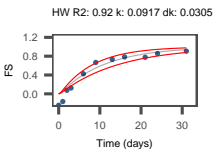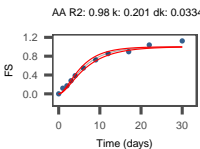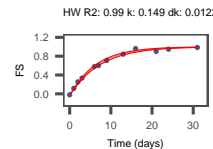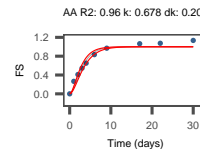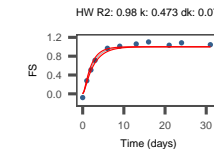

G6PI - ILGALIAMYEHK\_3

GABT - NLLLAEVINIUK\_3

GATM - VMVDANEVPIQK\_2

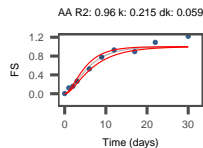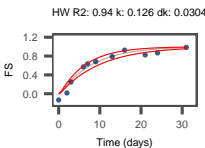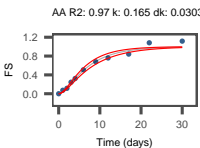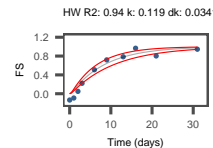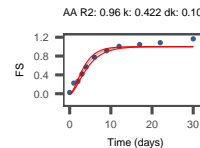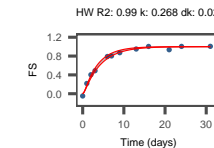

G6PI - ILLANFLAQTEALMK\_2

GAL3A - GGAEVQIFADVPQMVIDHTK\_4

GCDH - DIVYEMGELGLVPTIK\_2

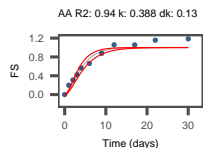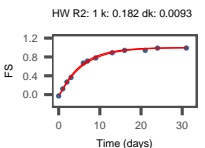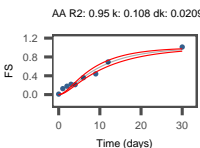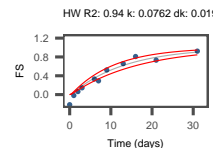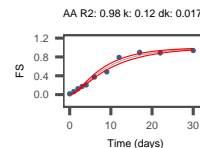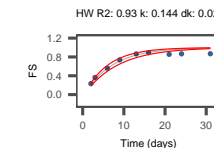

G6PI - TLASLSPETSLFIASK\_2

GAL3A - GVEVTGHEQEEGGK\_3

GCDH - HNPSNQSYTLGSK\_2

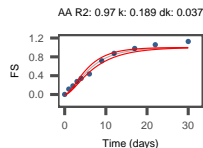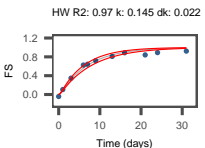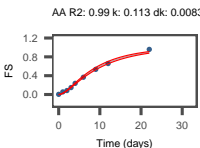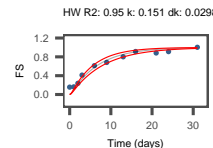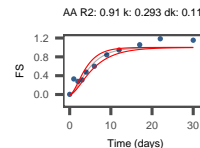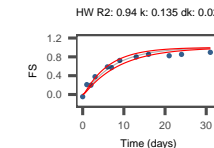

G6PI - VFEGNRPTNSIVFTK\_2

GALM - ASDVVLGFALEGLYQK\_3

GDIa - NPPYGGESSITPLEELYK\_2

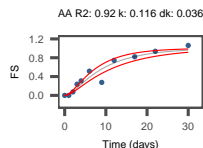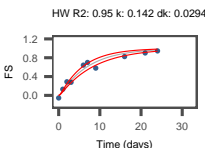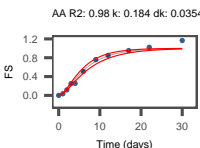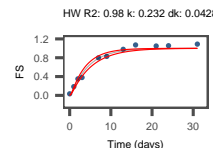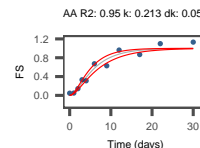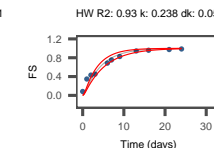

G6PI - VVVFVSNIDGTHIAK\_3

GALNS - ILLSLQLNGISK\_2

GDIb - FVSIIDLFPVK\_2

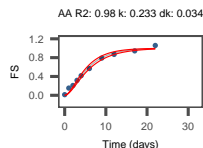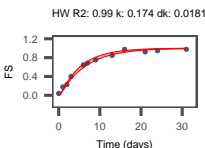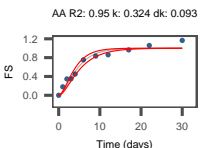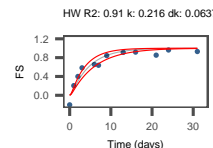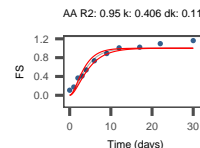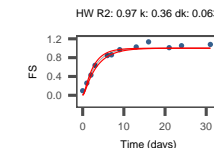



GDIB - VPSTEEALASSMLGFEK\_3

GLO2 - VTHLSTLQVGSLSVK\_3

GLYAT - HSENILYVSSETIK\_2

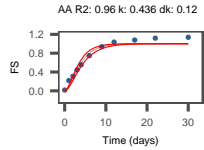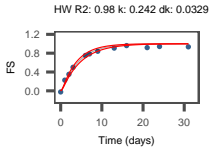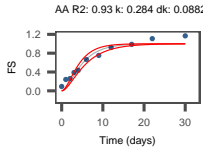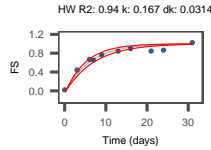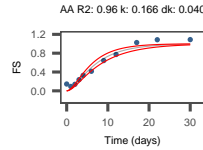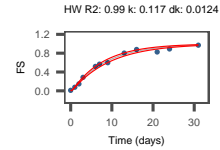

GDIB - YIAIVSTTVETK\_2

GLPK - TAESSHQVEIK\_2

GLYAT - HSENILYVSSETIK\_3

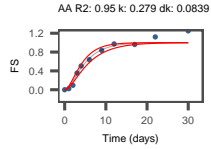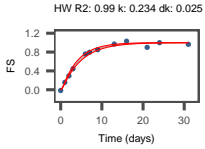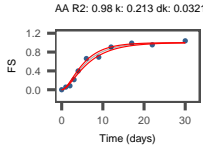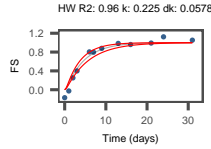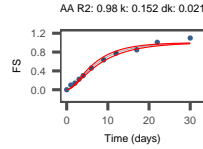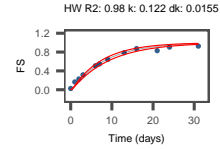

GDIR1 - AEEYFLTPMEEAPK\_2

GLPK(Non-Unique) - TGLPLSTYFSAVK\_2

GLYAT - IVLQGAQLQMLEK\_2

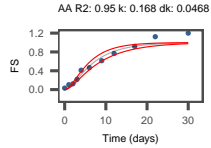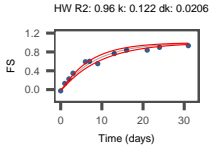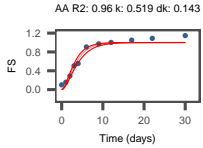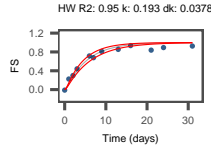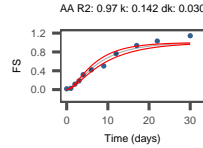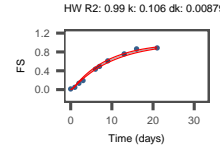

GGT1 - LADTLQILAQEGAK\_2

GLUCM - AGEQSWIQALPSVAK\_2

GLYAT - LFPSLLDTK\_2

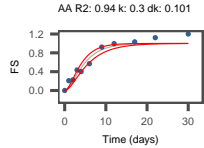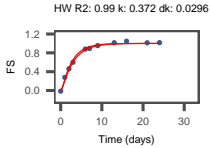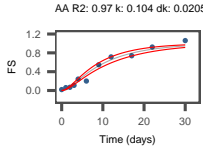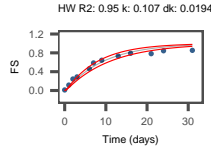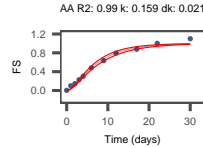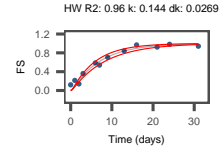

GGT1 - VLQEGEVTMPK\_2

GLYAL(Non-Unique) - YLPSLK\_2

GLYAT - QHLQIQSSQSHLNK\_3

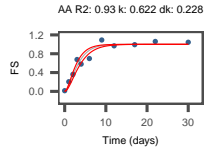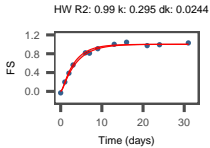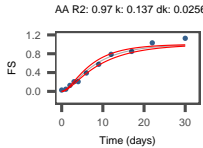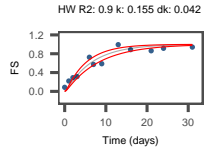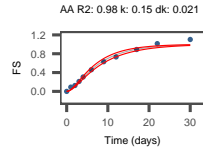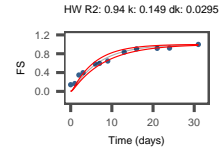

GLO2 - FYEGTADEMYK\_2

GLYAT - GYPVYSHTEK\_3

GLYAT - QHLQIQSSQSHLNK\_4

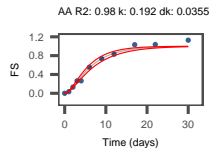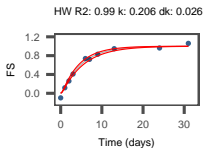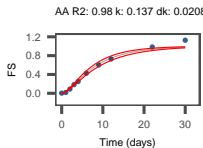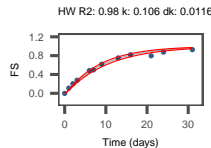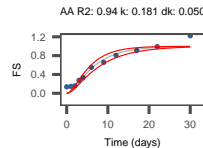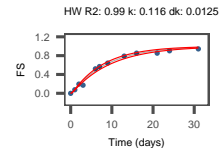

GLYC(Non-Unique) – ISATSIFFESMPYK\_2

GPDH – VIFFLPEWK\_2

GRP75 – SLGIETLGGVFTK\_2

AA R2: 0.98 k: 0.311 dk: 0.0588

HW R2: 0.93 k: 0.158 dk: 0.0335

AA R2: 0.97 k: 0.136 dk: 0.0238

HW R2: 0.9 k: 0.221 dk: 0.0789

AA R2: 0.98 k: 0.286 dk: 0.0443

HW R2: 0.98 k: 0.223 dk: 0.0394

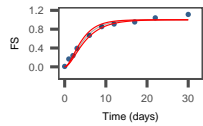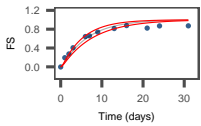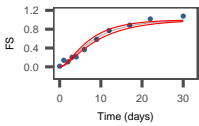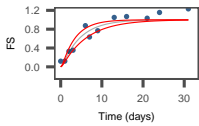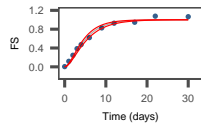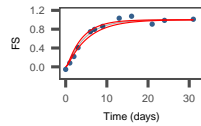

GLYM – GYLSVSGGDTHLVLDLRPK\_3

GPX1 – PGGGFEPNFTLFEK\_2

GRP75 – VINEPTAALAYGLDK\_2

AA R2: 0.97 k: 0.276 dk: 0.06

HW R2: 0.94 k: 0.233 dk: 0.0624

AA R2: 0.98 k: 0.158 dk: 0.0241

HW R2: 0.95 k: 0.102 dk: 0.0202

AA R2: 0.94 k: 0.243 dk: 0.0788

HW R2: 0.99 k: 0.255 dk: 0.0221

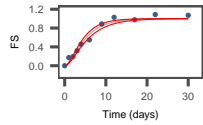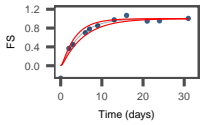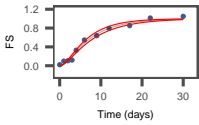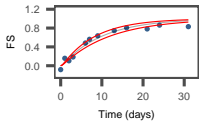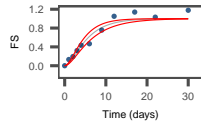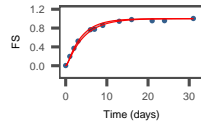

GLYM – GYLSVSGGDTHLVLDLRPK\_4

GRHR – RLPEAIEVK\_2

GSTA2(Non-Unique) – ALLNYIATK\_2

AA R2: 0.98 k: 0.38 dk: 0.0786

HW R2: 0.99 k: 0.197 dk: 0.02

AA R2: 0.96 k: 0.142 dk: 0.0324

HW R2: 0.99 k: 0.141 dk: 0.0132

AA R2: 0.98 k: 0.421 dk: 0.0926

HW R2: 0.99 k: 0.134 dk: 0.0137

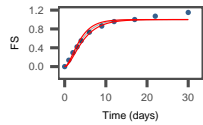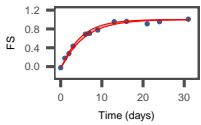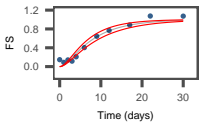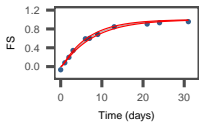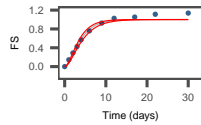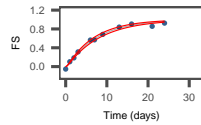

GLYM – YADVVTTHHK\_3

GRP75 – EQQVIQSSGGLSK\_2

GSTA2(Non-Unique) – DGNLMFDQVPMVEIDGMK\_2

AA R2: 0.93 k: 0.208 dk: 0.0528

HW R2: 0.95 k: 0.321 dk: 0.0782

AA R2: 0.94 k: 0.358 dk: 0.123

HW R2: 0.99 k: 0.265 dk: 0.0206

AA R2: 0.93 k: 0.467 dk: 0.178

HW R2: 0.98 k: 0.216 dk: 0.0297

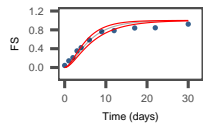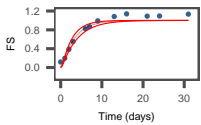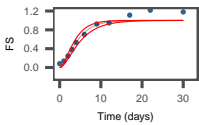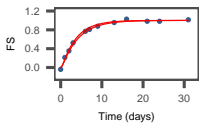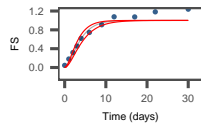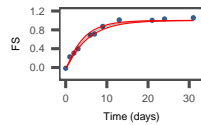

GPDA – ANTIGSLIK\_2

GRP75 – QAASSLQASLK\_2

GSTA2(Non-Unique) – FIQSPEDLEK\_2

AA R2: 0.98 k: 0.321 dk: 0.0632

HW R2: 0.93 k: 0.128 dk: 0.0291

AA R2: 0.95 k: 0.428 dk: 0.129

HW R2: 0.93 k: 0.277 dk: 0.0633

AA R2: 0.98 k: 0.264 dk: 0.0524

HW R2: 0.97 k: 0.222 dk: 0.0359

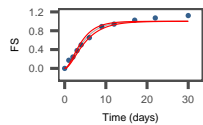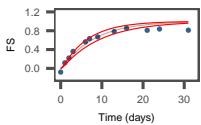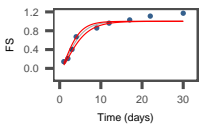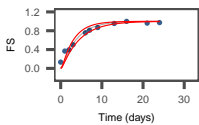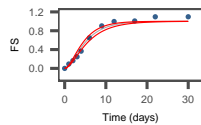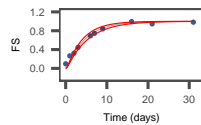

GPDA – LTEINTQHENVK\_3

GRP75 – RYDDPEVQK\_2

GSTA2(Non-Unique) – YLPAFEK\_2

AA R2: 0.96 k: 0.293 dk: 0.0805

HW R2: 0.97 k: 0.271 dk: 0.052

AA R2: 0.95 k: 0.316 dk: 0.0858

HW R2: 0.98 k: 0.282 dk: 0.0396

AA R2: 0.95 k: 0.525 dk: 0.171

HW R2: 0.98 k: 0.218 dk: 0.0267

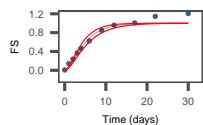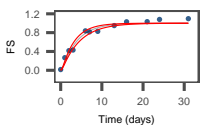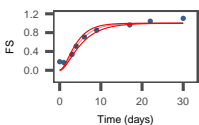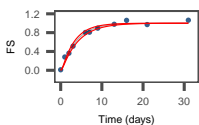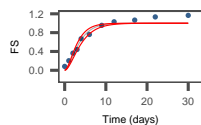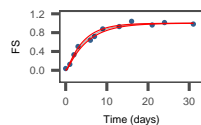

**GSTA3 – SDGSLMFQVQPMVEIDGMK\_2**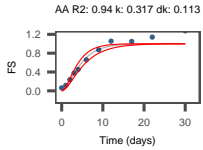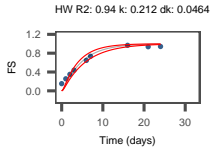**GSTM1(Non-Unique) – LGLDFPNLPYLIDGSHK\_3**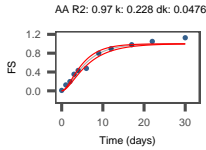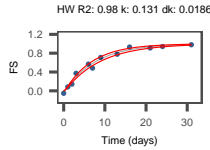**GSTT2 – VLGPLIGVQVPEK\_2**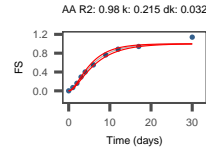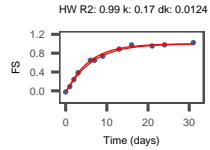**GSTA3 – VSNLPTVK\_2**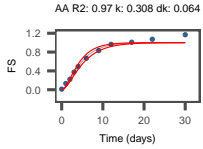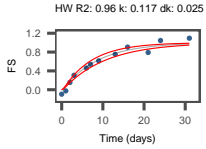**GSTM1 – MLLEYDSSYDEK\_2**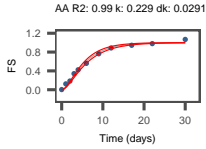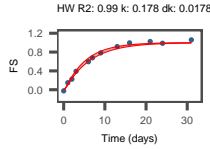**H10 – LVTTGVLK\_2**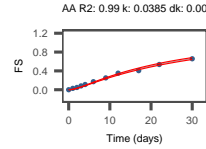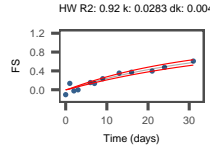**GSTK1 – LELLAYLLGEK\_2**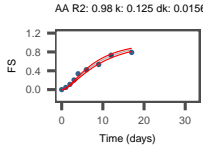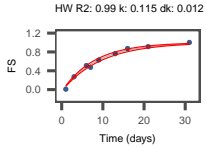**GSTM1 – YIATPIFSK\_2**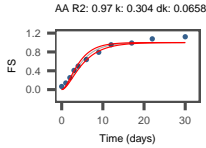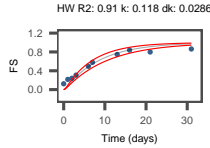**H10 – VGENADSIK\_2**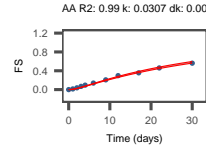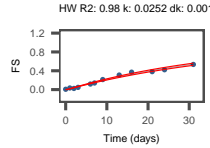**GSTK1 – LQLRPTLIAGIMK\_3**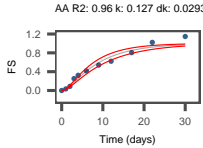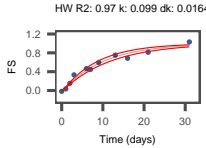**GSTM2 – LLLLEYDTSYDEK\_2**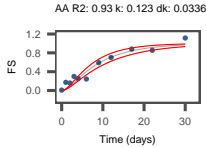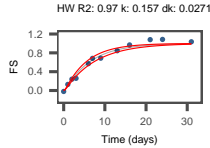**H12(Non-Unique) – ALAAAGYDVEK\_2**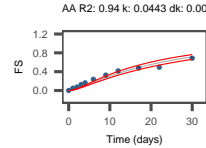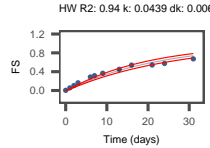**GSTM1 – CYNPDEK\_2**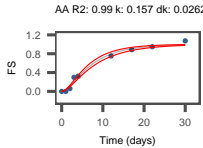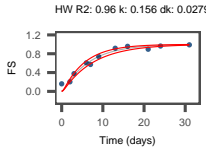**GSTM6(Non-Unique) – LYSEFLGK\_2**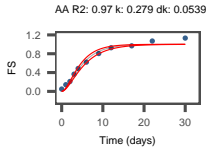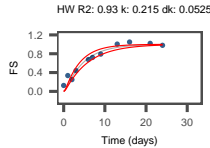**H12(Non-Unique) – ASGPPVSELITK\_2**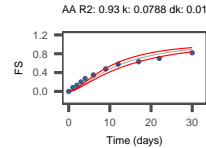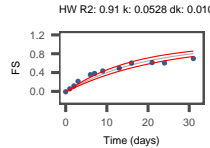**GSTM1 – KHHLDGETEER\_2**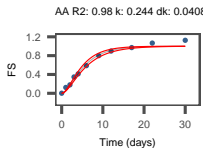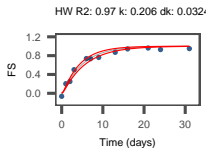**GSTP1(Non-Unique) – EEVVTIDTWMQLLK\_2**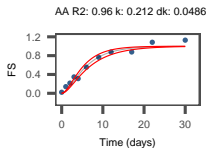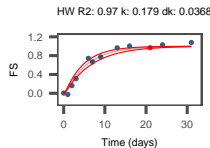**H12(Non-Unique) – SGVSLAALK\_2**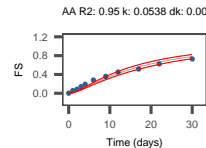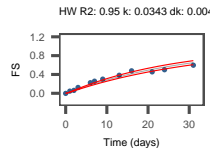

H14 - TSGPPVSELITK\_2

H2B1F(Non-Unique) - LLLPGELAK\_2

HAOX2 - SLLDLEANIK\_2

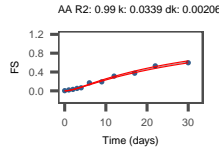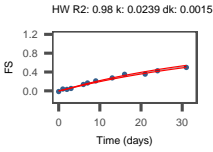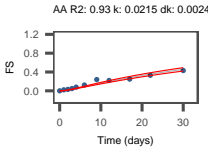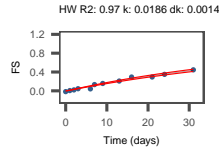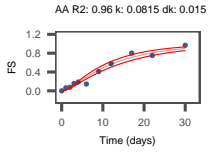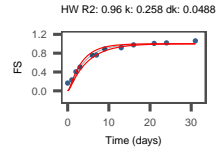

H2AX(Non-Unique) - LLGGVTIAQGGVLPNIQAVLLPK\_2

H4 - DAVTYTEHAK\_2

HBA - AAGHLLDPLGALSALSDLHAHK\_4

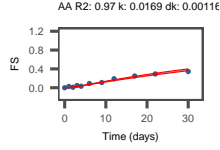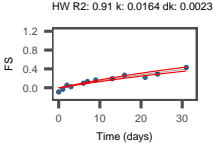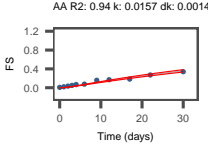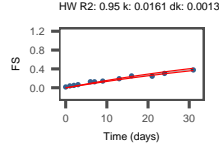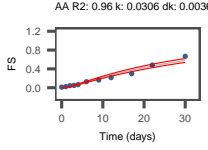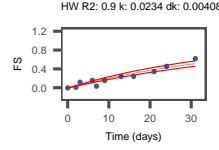

H2AX(Non-Unique) - LLGGVTIAQGGVLPNIQAVLLPK\_3

H4 - DAVTYTEHAK\_3

HBA - AAGHLLDPLGALSALSDLHAHK\_5

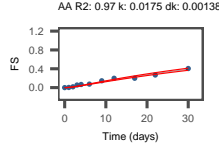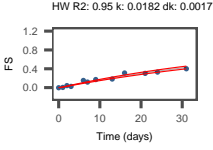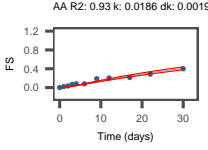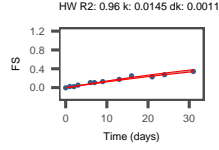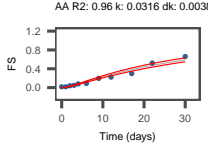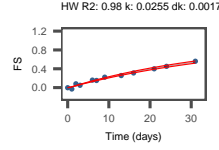

H2AY - AASADSTTEGTPDGFVTLSTK\_2

H4 - TVTAMDVVYALK\_3

HBA - CLLVTLASHHPADFTPAVHASLDK\_5

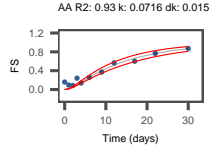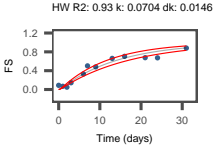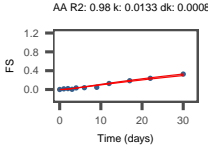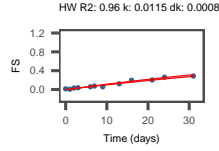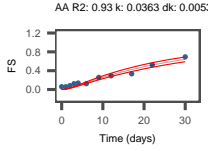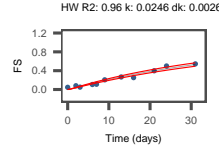

H2AY - GVTIASGGVLPNIHPELLAK\_3

HACL2 - NAQVAQSPVLLGGAESTLLQK\_3

HBA(Non-Unique) - LSDLHAHK\_2

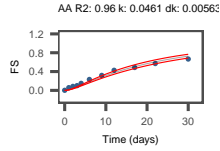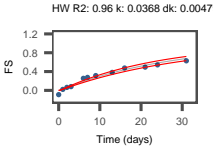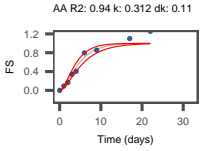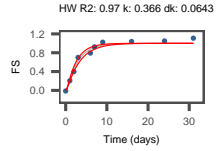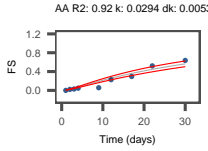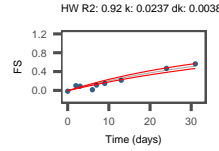

H2AY - QTAALILK\_2

HAOX2 - HSIAWADGCK\_2

HBA - TYFPDHSVHSGAQVK\_3

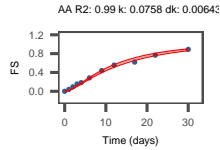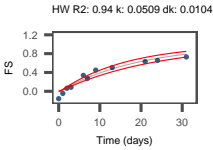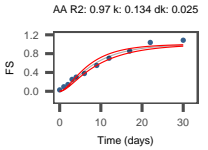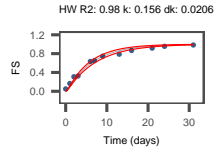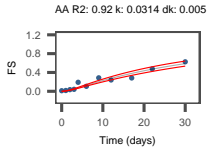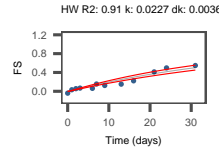

**HCD2 – VVTIAPGLFATPLLLTLPEK\_2**

**HEM2 – AGADIITYFAPQLLK\_3**

**HNRPD(Non-Unique) – GFGFVLFK\_2**

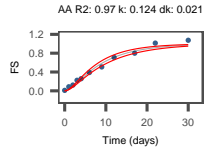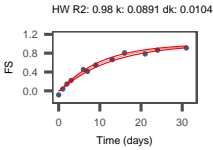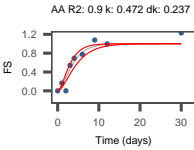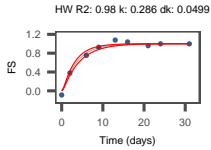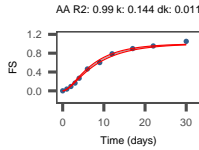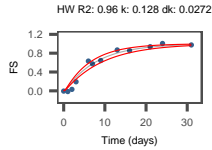

**HCD2 – VVTIAPGLFATPLLLTLPEK\_3**

**HEMH – VGPVPWLGPTDEAIK\_2**

**HNRPK – GSYDGLGPIITQVTIPK\_2**

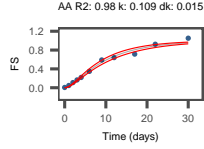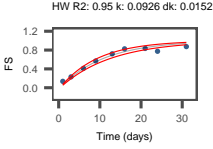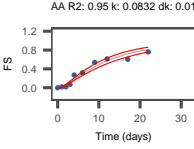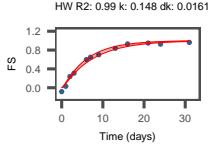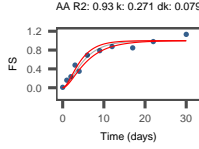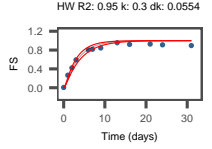

**HCDH – LGAGYPMGPFELLDYGLDITK\_2**

**HIBCH – VLEELLALK\_2**

**HNRPL – SDALETGLFNHYQMK\_3**

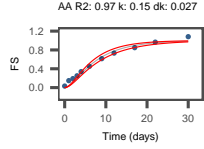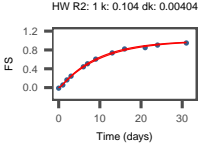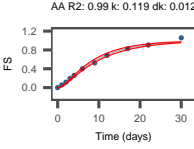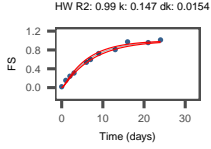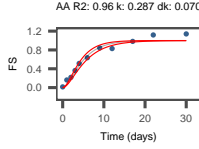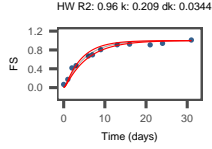

**HCDH – LGAGYPMGPFELLDYGLDITK\_3**

**HINT1 – AQAQPGDITFGK\_2**

**HOGA1 – FGIPGLK\_2**

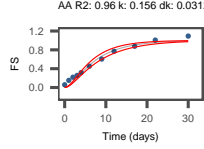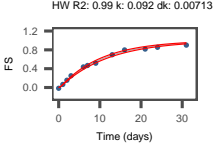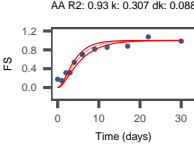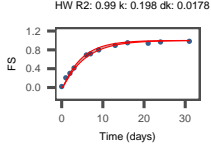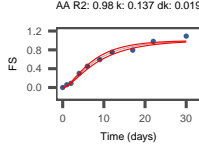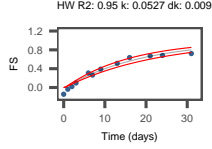

**HCDH – TLSCLSTSDAASVHVSTDLVVEAIVENLK\_3**

**HINT2 – ISQAEEDDQLLGHLLLVAK\_3**

**HS90A – ELHINLIPSK\_3**

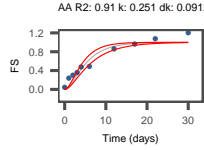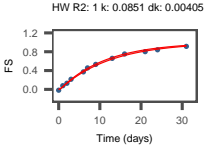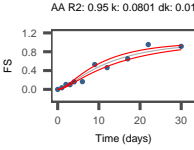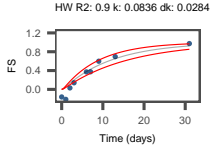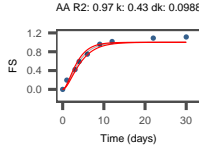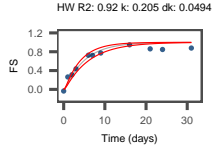

**HEM2 – AGADIITYFAPQLLK\_2**

**HMGCL – LDMLSEAGLPVEATSFVSPK\_2**

**HS90A – NPDDITNEEYGEFYK\_2**

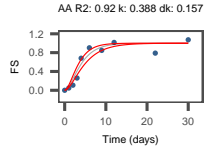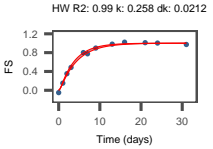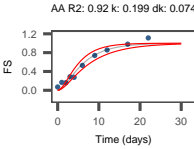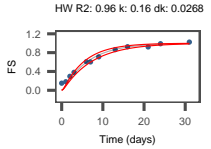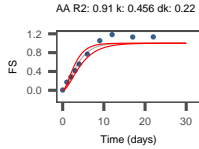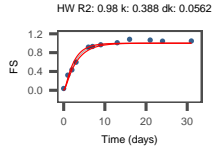

HS90A – YYTSASGDEMVLK\_2

HYES – ASDETGFIAVHK\_2

IAH1 – DCGTDVLDLWTLMQK\_2

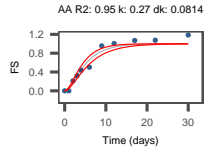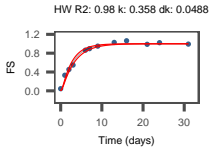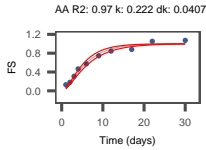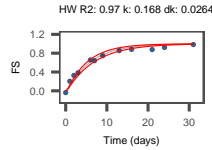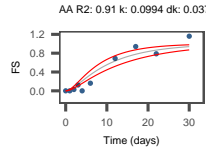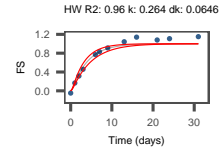

HS90B – APFDLFENK\_2

HYES – ATEIGILVNTPEDPNLSK\_2

IDHC(Non-Unique) – IIWELIK\_2

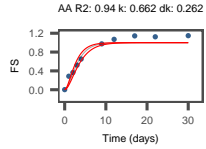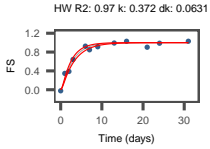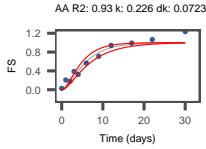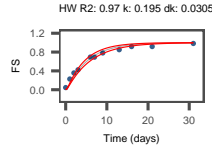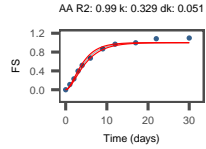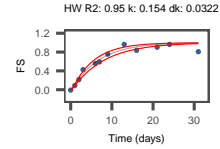

HS90B – NPDDITQEYGEFYK\_2

HYES – AVASLNTPFMPDPDVSPMK\_2

IDHC – LDNNTLSFFAK\_2

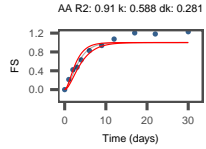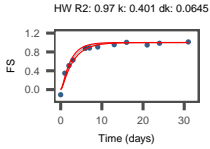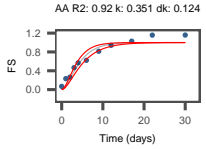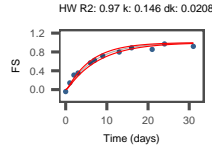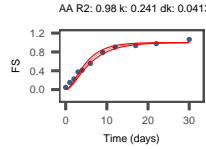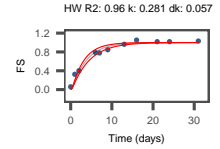

HSP7C – SINDPEAVAYGAAVQAAILSGDK\_3

HYES – ITTEEEIEFYQQFK\_2

IDHC – SDYLNTEFMDK\_2

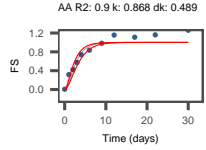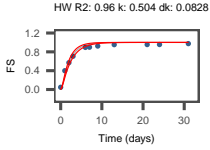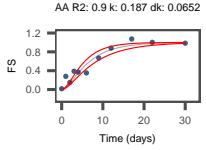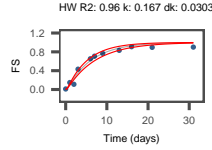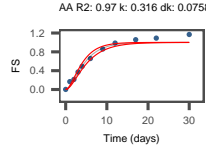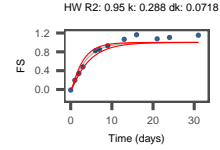

HXK2(Non-Unique) – NILIDFTK\_2

HYES – ITTEEEIEFYQQFK\_3

IDHG1 – ENTEGEYSSLEHESVAGVVELSK\_3

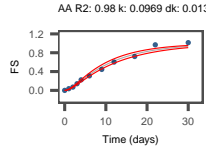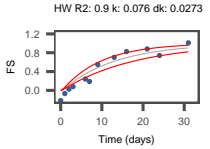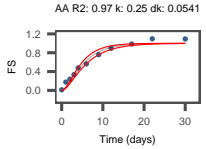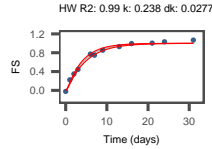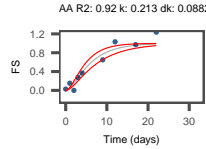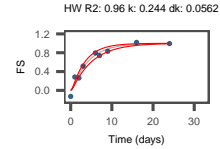

HYEP – IIPLLTDPK\_2

HYKK – ENFIWNLK\_2

IDHG1 – HTVTMIPGDGIGPELMLHVK\_4

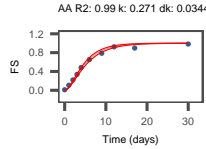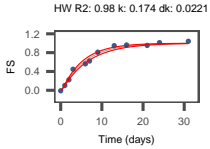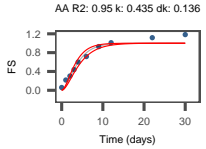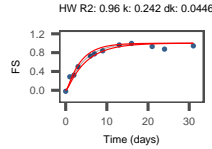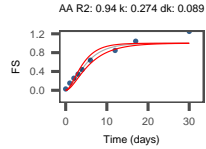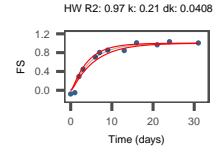



**KAD3 – VYQIDTVINLNPVFEVIK\_3****KEG1 – LPTLDQQLFK\_2****KPYM – IYVDDGLLSLQVK\_2**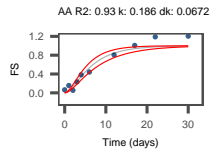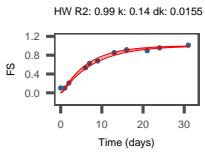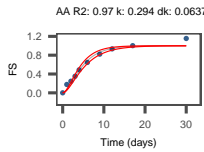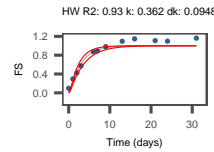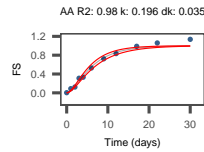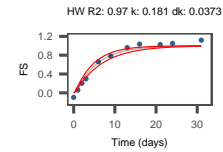**KAD4 – AVILGPPGSGK\_2****KEG1 – QHLQIQSSQSDLGK\_3****KPYM – LAPITSDPTEAAVGAVEASFK\_2**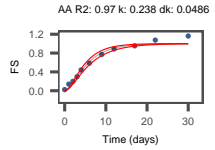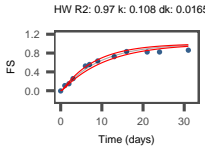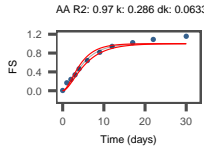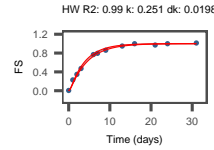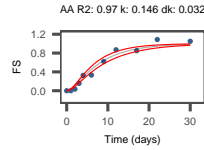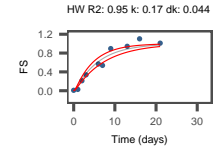**KAT3 – LGWSIGPAHLK\_3****KEG1 – QSLIYHVASQQITLEK\_3****LACB2 – ANIYPGHGPIVHNAEK\_2**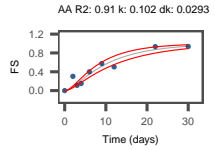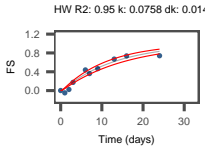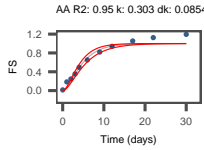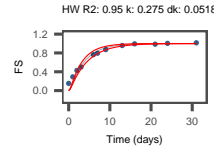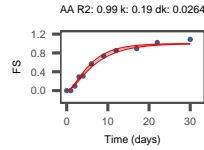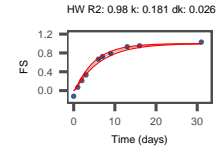**KCRU – VVVDALSGLK\_2****KHK – TILYDTNLDPVSAK\_2****LACB2 – ANIYPGHGPIVHNAEK\_4**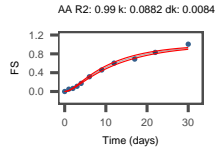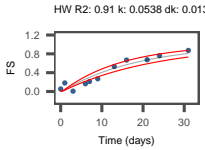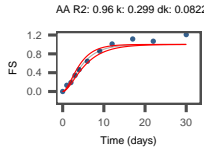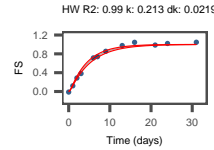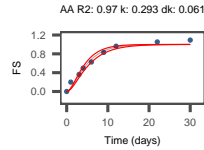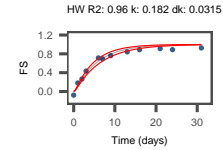**KEG1 – HLPESLK\_2****KHK – VSVEIKPR\_2****LACTB – WAGGGFLSTVGDLLK\_2**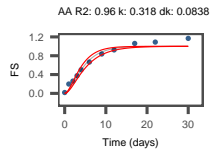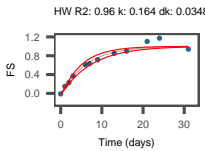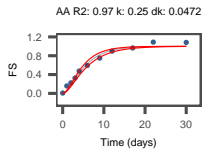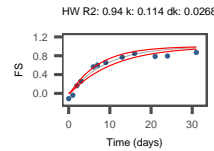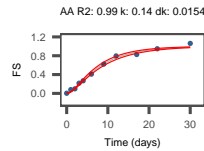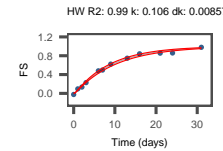**KEG1 – LGFFPMYAHVK\_3****KPYM – GVNLPGAAVDLPVSEK\_2****LAT4 – FSWLGFDPK\_3**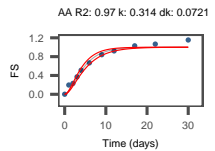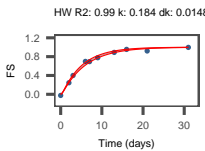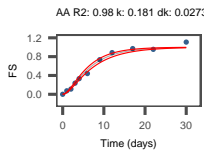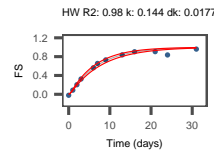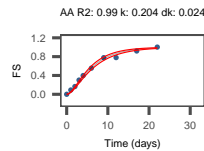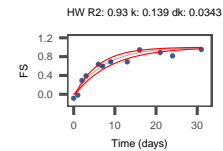





**LETM1 – VQQMIGQIDGLITLQTTQQDGK\_3**

AA R2: 0.95 k: 0.188 dk: 0.0572

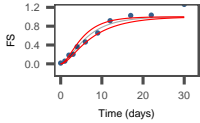

HW R2: 0.95 k: 0.201 dk: 0.0473

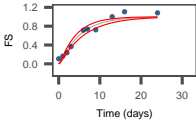

**LRP2 – GIALDPTVGYLFFSDWGSLSGQPK\_2**

AA R2: 0.94 k: 0.958 dk: 0.43

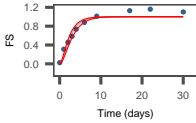

HW R2: 0.99 k: 0.335 dk: 0.031

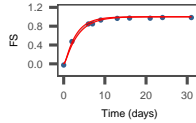

**LRP2 – LGWPAGITLDLVSK\_2**

AA R2: 0.96 k: 0.702 dk: 0.214

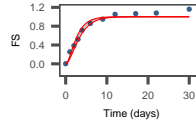

HW R2: 0.98 k: 0.364 dk: 0.0411

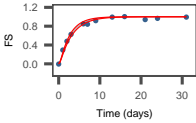

**LKHA4 – SHDQAVHYTQEHK\_4**

AA R2: 0.97 k: 0.133 dk: 0.022

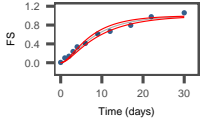

HW R2: 0.99 k: 0.128 dk: 0.0125

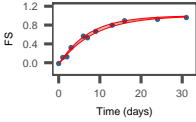

**LRP2 – GIALDPTVGYLFFSDWGSLSGQPK\_3**

AA R2: 0.93 k: 0.872 dk: 0.394

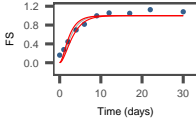

HW R2: 0.98 k: 0.371 dk: 0.0458

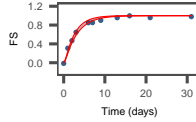

**LRP2 – LPTQPSGISTVVK\_2**

AA R2: 0.96 k: 0.632 dk: 0.19

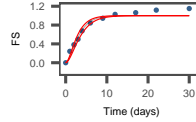

HW R2: 0.9 k: 0.266 dk: 0.0702

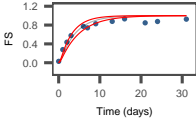

**LPPRC – LDASAILDTAK\_2**

AA R2: 0.93 k: 0.158 dk: 0.0542

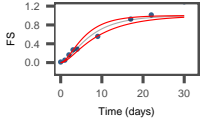

HW R2: 0.95 k: 0.147 dk: 0.0297

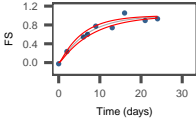

**LRP2 – GISLFEEHVFFDTWK\_3**

AA R2: 0.94 k: 0.819 dk: 0.328

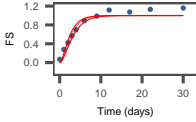

HW R2: 0.95 k: 0.608 dk: 0.127

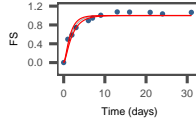

**LRP2 – SMAMNEQFVMEVGK\_2**

AA R2: 0.97 k: 0.23 dk: 0.0455

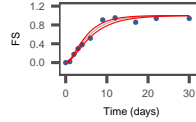

HW R2: 0.97 k: 0.506 dk: 0.085

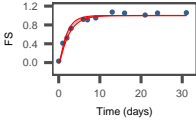

**LPPRC – LEDTAFQVLLALPLSK\_2**

AA R2: 0.97 k: 0.212 dk: 0.0425

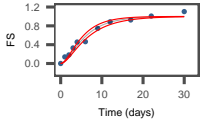

HW R2: 0.96 k: 0.175 dk: 0.0361

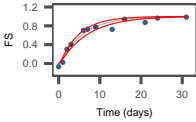

**LRP2 – GIVMGVDFHYQK\_2**

AA R2: 0.94 k: 0.422 dk: 0.15

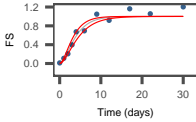

HW R2: 0.9 k: 0.628 dk: 0.169

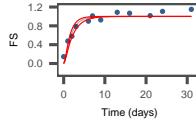

**LRP2 – WLITTQLDQPAIAIVNPK\_2**

AA R2: 0.96 k: 0.616 dk: 0.172

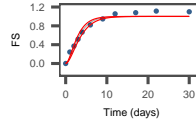

HW R2: 0.98 k: 0.385 dk: 0.0448

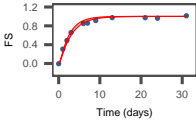

**LRC59 – LVTLPVSFALQK\_2**

AA R2: 0.98 k: 0.409 dk: 0.0706

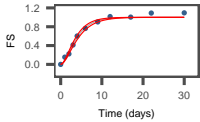

HW R2: 0.95 k: 0.174 dk: 0.0354

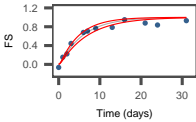

**LRP2 – GYMYWTDWGTNAK\_2**

AA R2: 0.91 k: 0.236 dk: 0.096

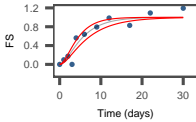

HW R2: 0.98 k: 0.338 dk: 0.0464

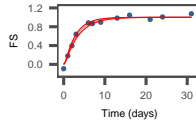

**M2OM – LTGADGTPPGFLK\_2**

AA R2: 0.97 k: 0.147 dk: 0.0252

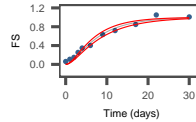

HW R2: 0.94 k: 0.0588 dk: 0.0132

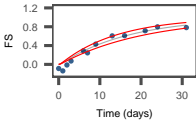

**LRP2 – ENWIFGISLDEPK\_2**

AA R2: 0.91 k: 0.698 dk: 0.349

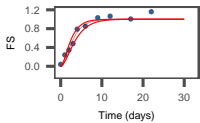

HW R2: 0.98 k: 0.398 dk: 0.0417

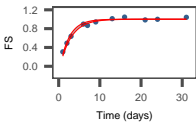

**LRP2 – LGHVQDMTHPFLTVFK\_4**

AA R2: 0.93 k: 0.809 dk: 0.351

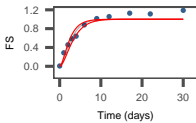

HW R2: 0.99 k: 0.323 dk: 0.0301

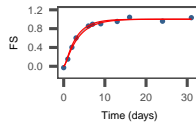

**M2OM – TSFHALTSILK\_3**

AA R2: 0.99 k: 0.11 dk: 0.0105

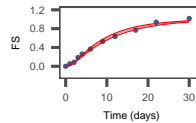

HW R2: 0.95 k: 0.0761 dk: 0.0137

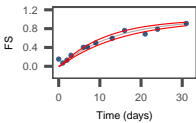

MAAI - DGGQQFTTEEFQTLNPMK\_2

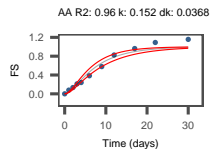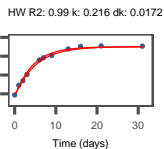

MAOX - GHIAVSLNAWPEDVVK\_3

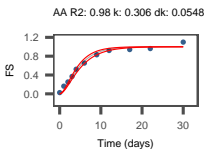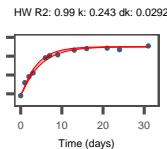

MDHC - VIVVGNPANTNCLTASK\_2

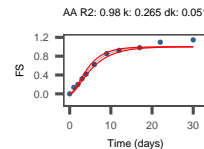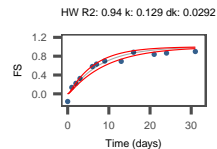

MAAI - GIDYEIVPINLIK\_2

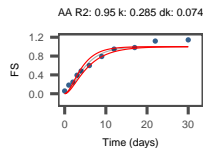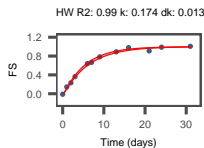

MAOX - GPEYDAFLDEFMEAASSK\_2

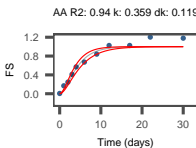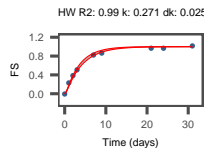

MDHM - ANTFVAELK\_2

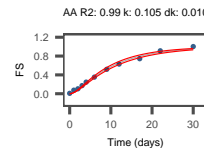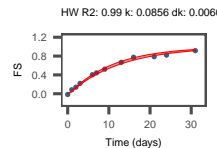

MAAI - LLPDPQK\_2

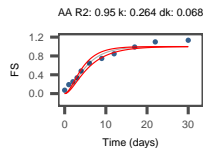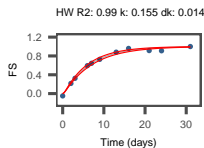

MAOX - MATVYPEQNK\_2

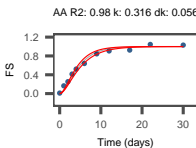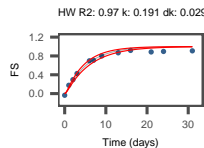

MDHM - EGVVECSFVQSK\_2

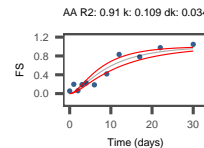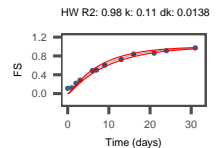

MAAI - MISDLIASGIPLQLNSLVK\_2

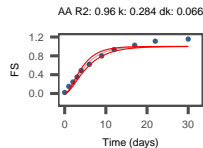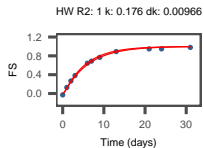

MARC2 - SIYQSSPLFGMYFSVEK\_3

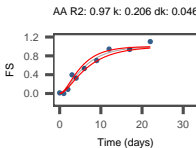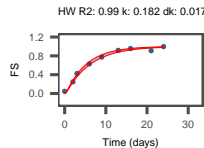

MDHM - IQEAGTEVVK\_2

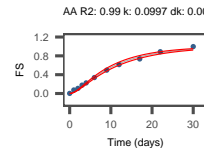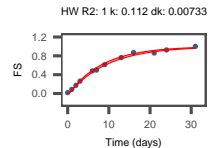

MAAI - QVGQENMQWAQK\_2

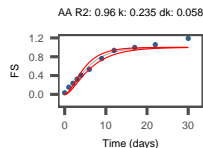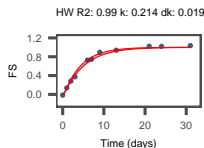

MCCB - LGTQPDSASSTYQENYEQMK\_2

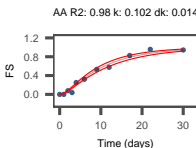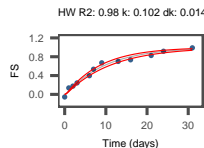

MDHM - VNVPIVGHAGK\_2

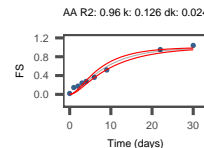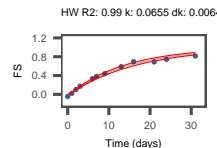

MAAI - VITSGFNALEK\_2

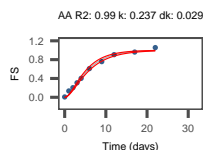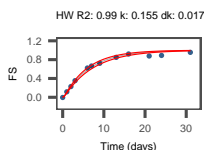

MCCB - QGTFLAGPLVK\_2

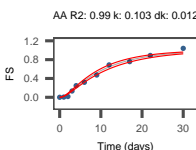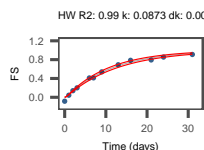

MEP1A - IQTFQGDSDHNWK\_2

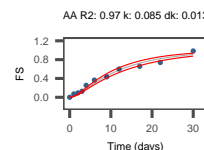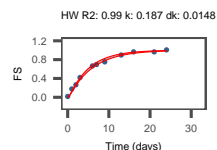

MEP1B – MDFSDYDLLK\_2

MIC26 – IDELSLSVPEGQSK\_2

MLEC – YNEETFGYEVPVK\_2

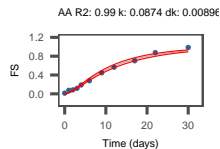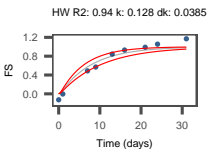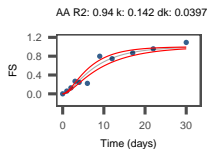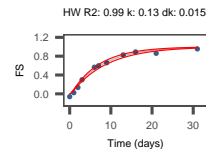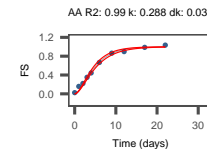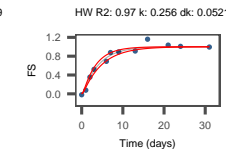

MEP1B – NSIIGDHK\_2

MIC60 – TAMDNSEIAGEK\_2

MMSA – EEIFGPVLVLELETDLDEAIK\_2

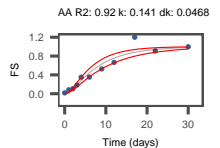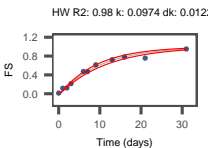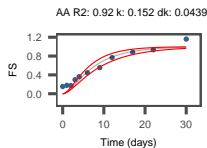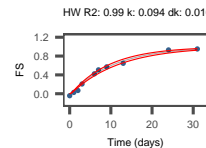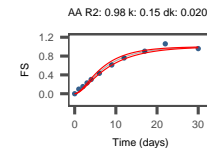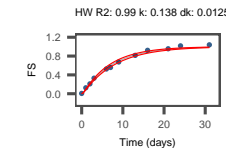

MEP1B – VSQVLSGPESDHDK\_2

MIC60 – TSSVLTQTITAQNAAVQAVK\_2

MMSA – EEIFGPVLVLELETDLDEAIK\_3

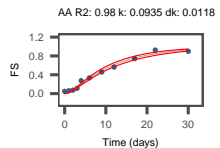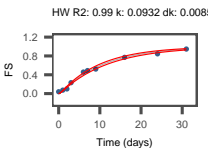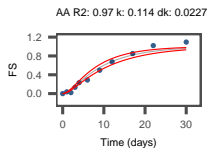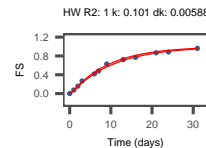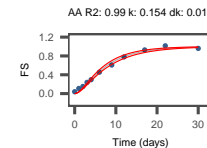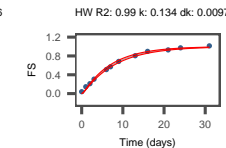

MIC13 – DSWNSGIISVMSALSVPASK\_2

MIF – ASVPEGFLSELTQQLAQATGK\_2

MMSA – LITLEQ GK\_2

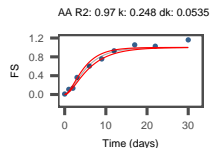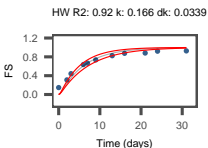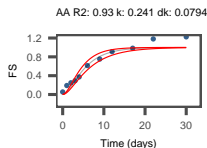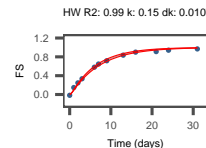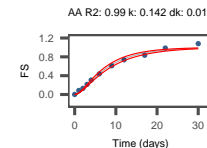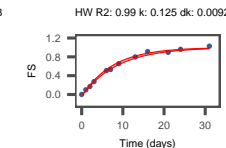

MIC13 – DSWNSGIISVMSALSVPASK\_3

MIF – ASVPEGFLSELTQQLAQATGK\_3

MMSA – MALSTAILGEAK\_2

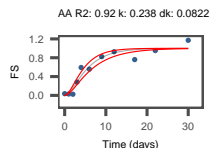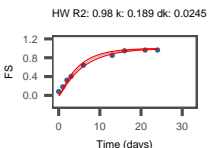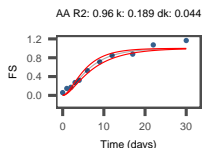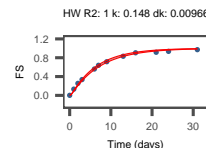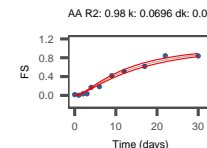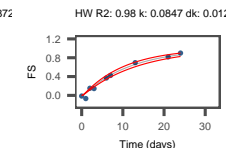

MIC19 – YSSVYGASVSDDLK\_2

MLEC – LYIEFVK\_2

MMSA – NHGVMPDANK\_2

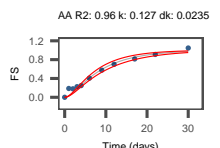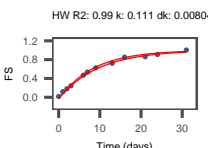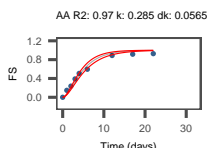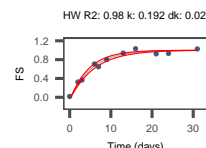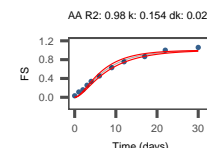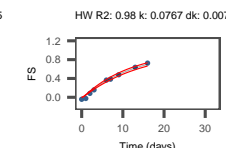

MMSA - VNAGDQPGADLGLITPQAK\_2

MPCP - EELNAYFK\_2

MYH9 - FVSELWK\_2

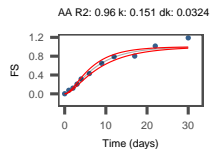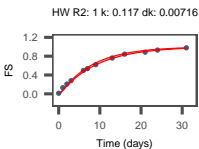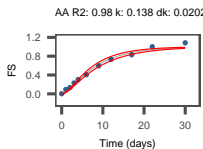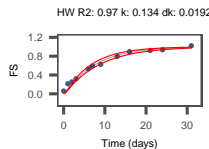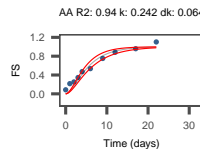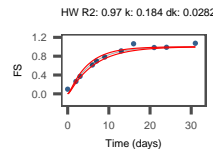

MMSA - VNAGDQPGADLGLITPQAK\_3

MPCP - TAVVPLDLVK\_2

MYH9 - IGLDQVAGMSETALPGAFK\_2

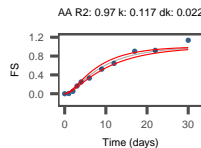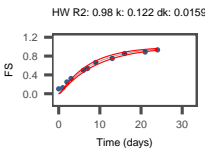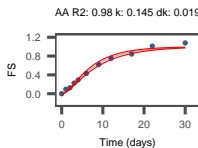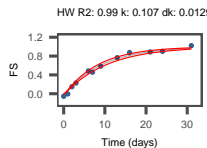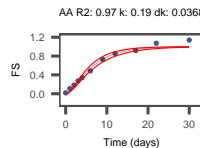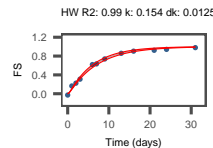

MMSA - VPGATMLLAK\_2

MPU1 - GLLVPILLPEK\_2

MYH9 - LTEMETMQSQLMAEK\_2

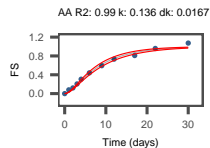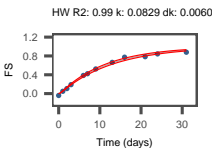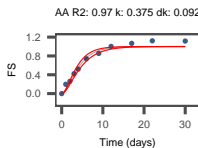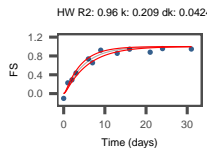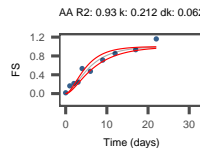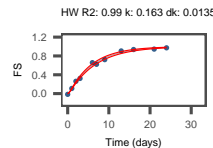

MOES - ESEAVEVQK\_2

MSRA - TEPIPVTK\_2

MYH9 - QIATLHAQVDTMK\_3

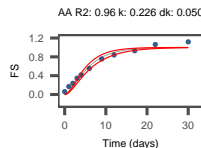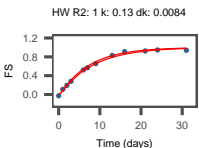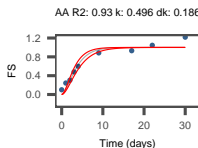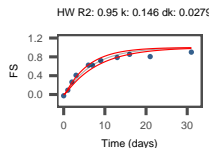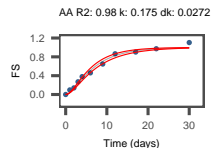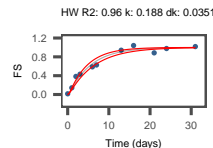

MOES - EVWFFGLYQDTK\_2

MTX2 - VPFHVGQNVSELGPIVQVK\_3

MYH9 - TEMEDLMSSK\_2

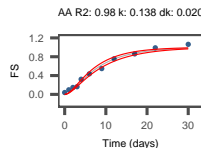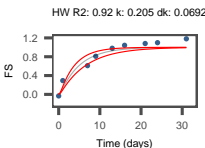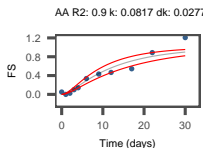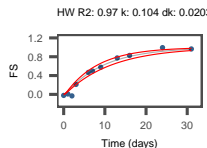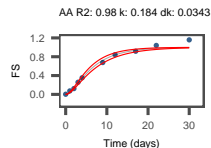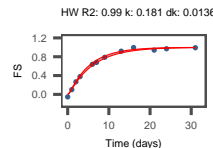

MPCP - AVEEYSCEFGSMK\_2

MYH9 - ALEQQVEEMK\_2

MYH9 - VEAQLQLQVK\_2

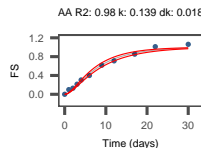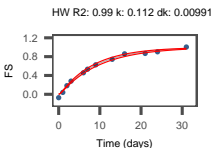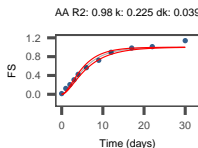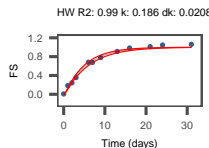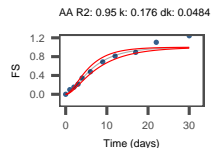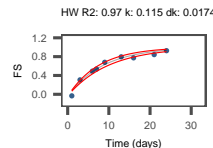

MYH9 – VISGLQLGNIAFK\_2

NDKA – DRPFTGLVK\_3

NDUAA – VTSAYLQDIENAYK\_2

AA R2: 0.98 k: 0.184 dk: 0.0294

HW R2: 0.99 k: 0.144 dk: 0.0114

AA R2: 0.97 k: 0.277 dk: 0.0582

HW R2: 0.97 k: 0.17 dk: 0.0296

AA R2: 0.98 k: 0.137 dk: 0.0195

HW R2: 0.98 k: 0.16 dk: 0.0228

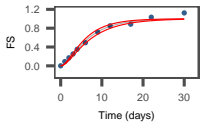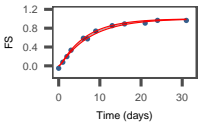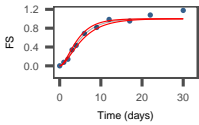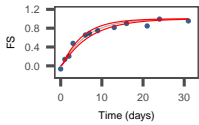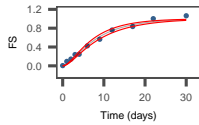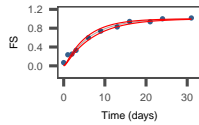

MYL6 – VLDFEHFLPMLQTVAK\_3

NDKA – FLQASEDLK\_2

NDUAA – YGLLAAILGDK\_2

AA R2: 0.96 k: 0.191 dk: 0.0514

HW R2: 0.98 k: 0.28 dk: 0.0384

AA R2: 0.92 k: 0.429 dk: 0.183

HW R2: 0.99 k: 0.235 dk: 0.0196

AA R2: 0.98 k: 0.154 dk: 0.023

HW R2: 0.99 k: 0.112 dk: 0.0108

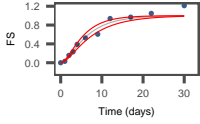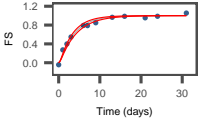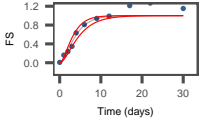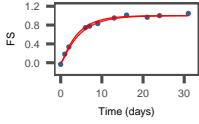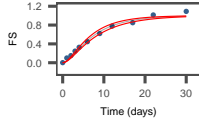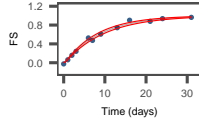

MYO1C – QLLLTSAVVIVEDAK\_2

NDKB – DRPFFPGLVK\_3

NDUAD – IALMPLFQAEK\_2

AA R2: 0.97 k: 0.0916 dk: 0.0158

HW R2: 0.97 k: 0.102 dk: 0.0185

AA R2: 0.96 k: 0.366 dk: 0.0951

HW R2: 0.98 k: 0.155 dk: 0.0192

AA R2: 0.97 k: 0.146 dk: 0.0265

HW R2: 0.99 k: 0.126 dk: 0.00985

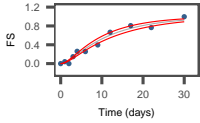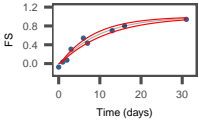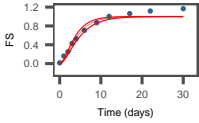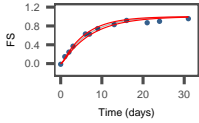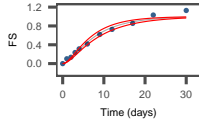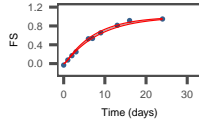

NB5R3 – STPAITLENPKI\_2

NDRG1 – ISGWTQALPDMVVSHLFGK\_3

NDUB3 – IEGTPLETVQK\_2

AA R2: 0.91 k: 0.418 dk: 0.187

HW R2: 0.95 k: 0.222 dk: 0.0432

AA R2: 0.92 k: 5.42 dk: 8.11

HW R2: 0.94 k: 0.711 dk: 0.151

AA R2: 0.99 k: 0.132 dk: 0.0129

HW R2: 0.97 k: 0.125 dk: 0.0238

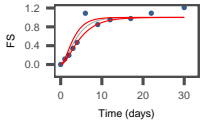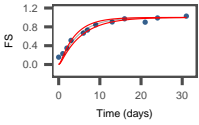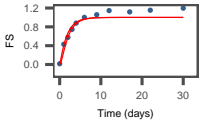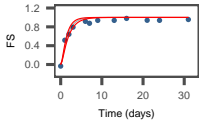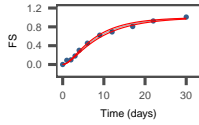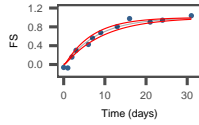

NCEH1 – LDWTSLLPSSIK\_2

NDUA2 – YAFGQEK\_2

NDUB5 – NFDYDPEK\_2

AA R2: 0.98 k: 0.386 dk: 0.0772

HW R2: 0.97 k: 0.254 dk: 0.0454

AA R2: 0.91 k: 0.188 dk: 0.0621

HW R2: 0.94 k: 0.142 dk: 0.0301

AA R2: 0.98 k: 0.12 dk: 0.018

HW R2: 0.98 k: 0.0949 dk: 0.0127

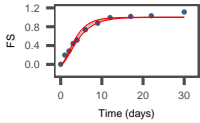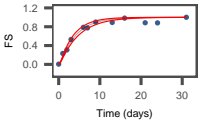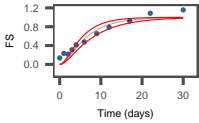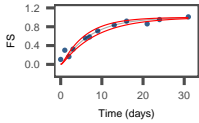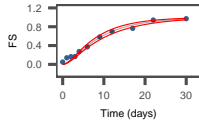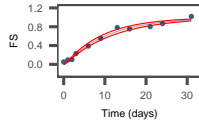

NCPR – TYEHFNMGK\_3

NDUA4 – FYSVNVDSK\_2

NDUB9 – AMYPDYFSK\_2

AA R2: 0.96 k: 0.599 dk: 0.192

HW R2: 0.97 k: 0.487 dk: 0.0767

AA R2: 0.97 k: 0.269 dk: 0.0556

HW R2: 0.99 k: 0.221 dk: 0.0254

AA R2: 0.97 k: 0.14 dk: 0.0236

HW R2: 0.99 k: 0.0902 dk: 0.0102

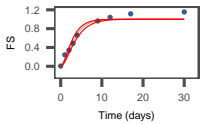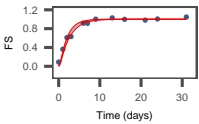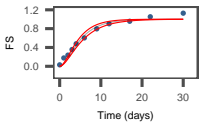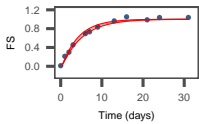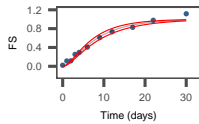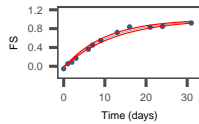



NIT2 – ESSIYLGSIPEEDAGK\_2

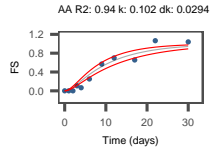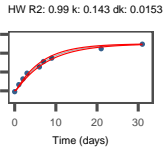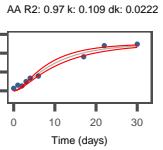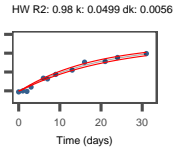

NNTM – VTIAGQYDALSSMANISGYK\_3

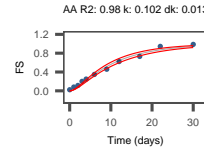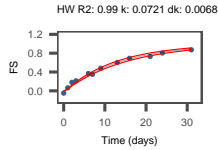

NIT2 – IHLFDIVPGK\_3

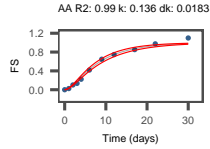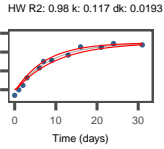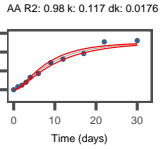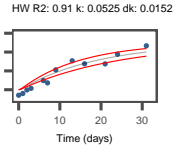

NU4M – MPLYGVHLWLPK\_3

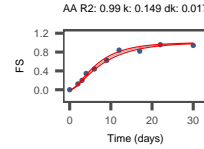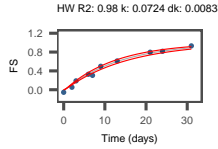

NIT2 – LALIQLQVSSIK\_2

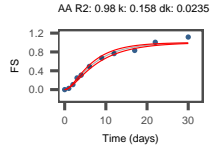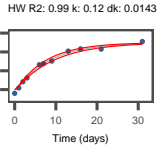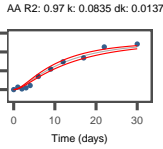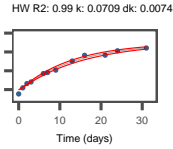

NU5M – TSLTLLDLIWLEK\_2

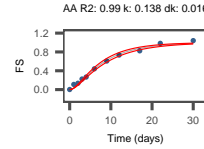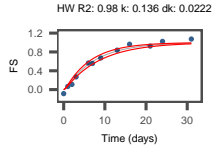

NNRD – LSQALGNITVVQK\_2

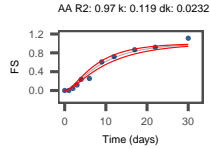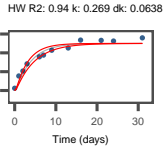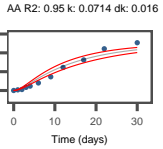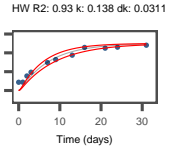

NUD19 – DSDFLEK\_2

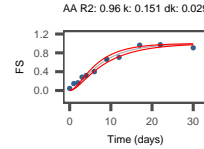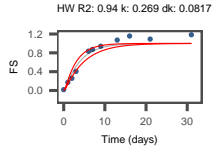

NNRE – GNPSGIQPDLLISLTAPK\_2

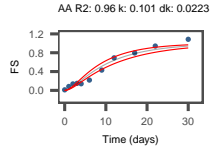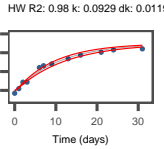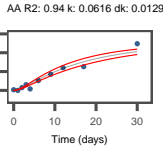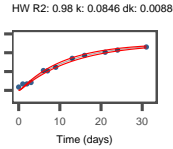

OCTC – AASDLQIAASTFTSFGK\_2

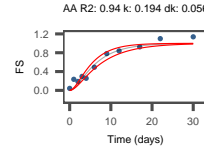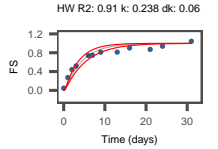

NNTM – AAALQFK\_2

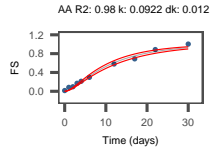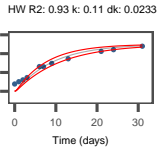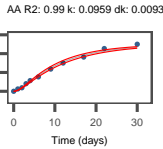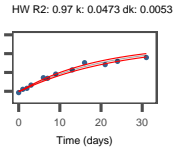

OCTC – DSIMNYFK\_2

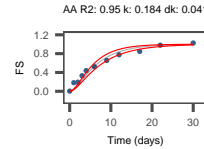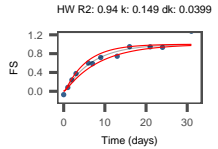





PARK7 – TQGPYDVVLPGGNLGAQNLSESPMVK\_3

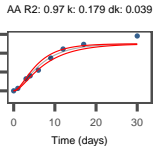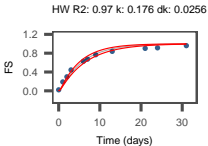

PCKGC – EIISFGSGYGGNSLLGK\_2

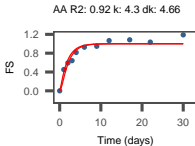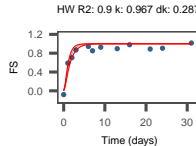

PEBP1 – VDYAGTVDELGK\_2

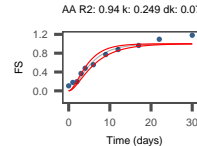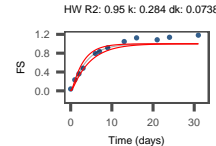

PCCA – AQAVHPGYFLSENK\_3

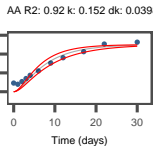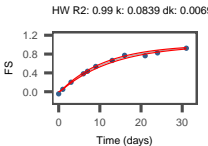

PDIA1 – DHENIIAK\_2

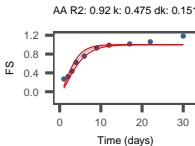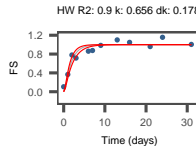

PECR – EGVYNLTG\_2

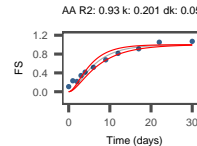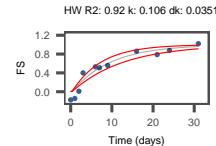

PCCA – VDSGIQPGSDISIYDPMISK\_2

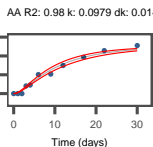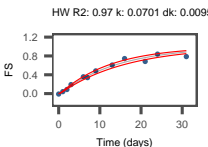

PDIA1 – ILEFFGLK\_2

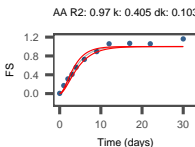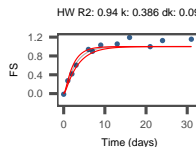

PECR – SIPDHDNWPVGAGDLSIVK\_3

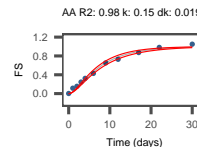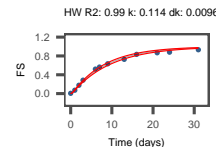

PCCB – AYGGAYDMSSK\_2

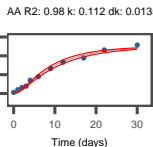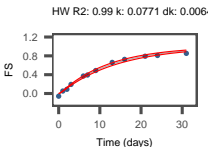

PDIA1 – THILLFLPK\_3

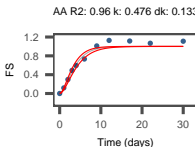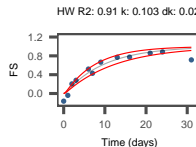

PGAM1 – FSGWYDADLSPAGHEAK\_3

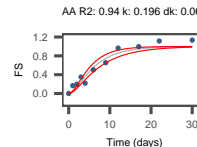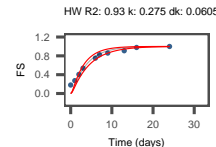

PCCB – DTSYLFTGPEVVK\_2

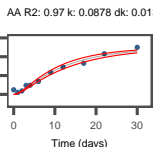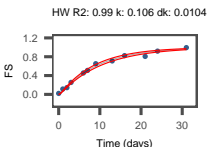

PDIA3 – DLLTAYDYDVEK\_2

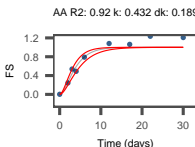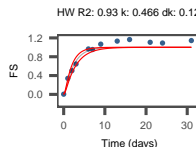

PGAM1 – YADLTEDQLPSCESLK\_2

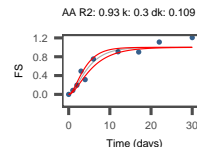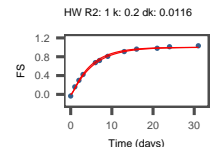

PCCB – SVTNEDVTQEQLGGAK\_2

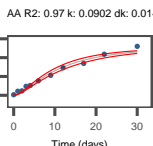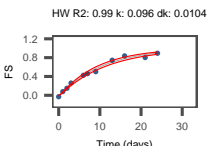

PDIA3 – SEPIPESENEGPVK\_2

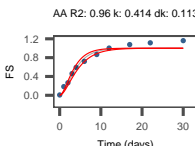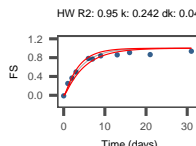

PGAM2 – SFDTPPPMDEK\_2

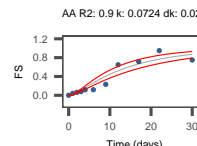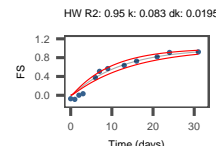

PGBM – IPGDQIVSVVFIK\_2

PHB – VLPSITTEILK\_2

PLSI(Non-Unique) – QFVTPADVVSNGPK\_2

AA R2: 0.98 k: 0.0237 dk: 0.00163

HW R2: 0.96 k: 0.0251 dk: 0.0028

AA R2: 0.98 k: 0.117 dk: 0.0179

HW R2: 0.99 k: 0.0858 dk: 0.0086

AA R2: 0.95 k: 0.0971 dk: 0.0208

HW R2: 0.97 k: 0.11 dk: 0.0174

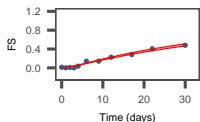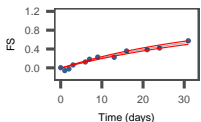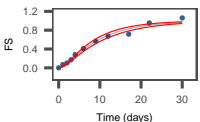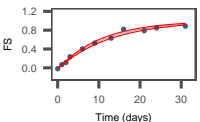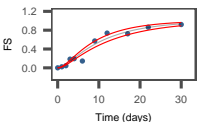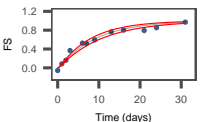

PGK1 – AGGFLMK\_2

PHB2 – IVQAEGEAAK\_2

PLSI – VTDDIIK\_2

AA R2: 0.98 k: 0.238 dk: 0.0393

HW R2: 0.94 k: 0.0964 dk: 0.0264

AA R2: 0.97 k: 0.0803 dk: 0.0124

HW R2: 0.99 k: 0.0894 dk: 0.0065

AA R2: 0.92 k: 0.088 dk: 0.0182

HW R2: 0.95 k: 0.191 dk: 0.0472

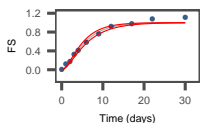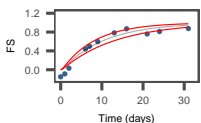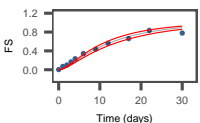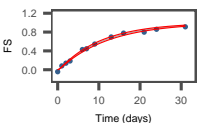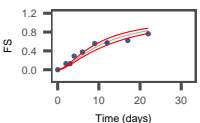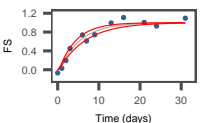

PGK1 – AHSSMVGVNLPQK\_3

PHB2 – VLPSIVNEVK\_2

PLST – ISFNEFVYFQEVK\_2

AA R2: 0.97 k: 0.196 dk: 0.039

HW R2: 0.96 k: 0.113 dk: 0.0185

AA R2: 0.99 k: 0.116 dk: 0.0151

HW R2: 0.99 k: 0.0824 dk: 0.0053

AA R2: 0.92 k: 0.13 dk: 0.0405

HW R2: 0.94 k: 0.135 dk: 0.0348

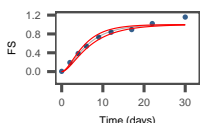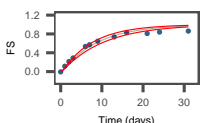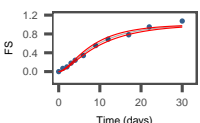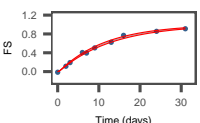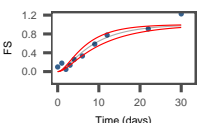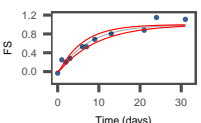

PGK1 – ALESPERFLAILGGAK\_3

PICAL – ITAAQHSVTGSVSK\_2

PP1A(Non-Unique) – EIFLSQPILLEAPLK\_2

AA R2: 0.91 k: 0.254 dk: 0.0909

HW R2: 0.99 k: 0.15 dk: 0.0147

AA R2: 0.93 k: 0.719 dk: 0.312

HW R2: 0.95 k: 0.642 dk: 0.148

AA R2: 0.95 k: 0.49 dk: 0.125

HW R2: 0.94 k: 0.372 dk: 0.0778

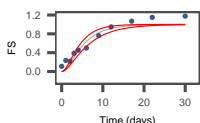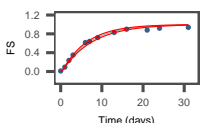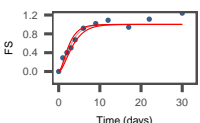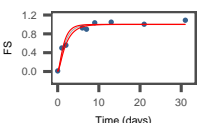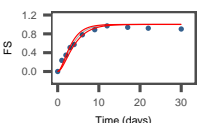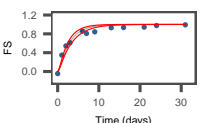

PGK1 – SVVLMSHLGRPDGVPMPDK\_3

PICAL – ITAAQHSVTGSVSK\_3

PPIA(Non-Unique) – FEDENFIK\_2

AA R2: 0.95 k: 0.215 dk: 0.0617

HW R2: 0.96 k: 0.128 dk: 0.0245

AA R2: 0.92 k: 0.993 dk: 0.389

HW R2: 0.94 k: 1.55 dk: 95.4

AA R2: 0.97 k: 0.252 dk: 0.0491

HW R2: 0.97 k: 0.264 dk: 0.049

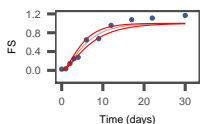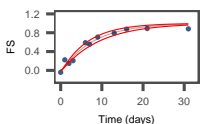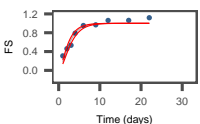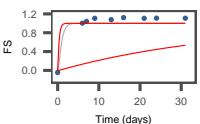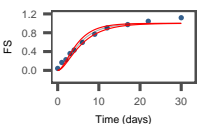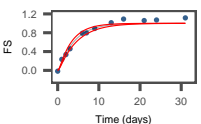

PHB – AATFGLLDDVSLTHLTFGK\_3

PLSI – NEALIALLK\_2

PPIA(Non-Unique) – TEWLDGK\_2

AA R2: 0.98 k: 0.115 dk: 0.0148

HW R2: 0.94 k: 0.212 dk: 0.0597

AA R2: 0.99 k: 0.211 dk: 0.0218

HW R2: 0.95 k: 0.108 dk: 0.0269

AA R2: 0.96 k: 0.227 dk: 0.0554

HW R2: 0.94 k: 0.285 dk: 0.0773

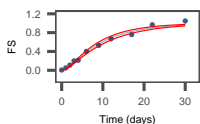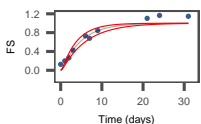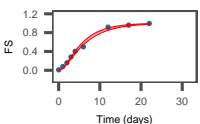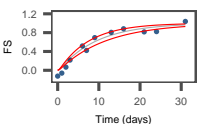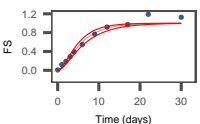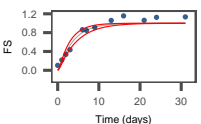



PSA2 – LVQIEYALAAVAGGAPSVGIK\_2

AA R2: 0.93 k: 0.0875 dk: 0.0287

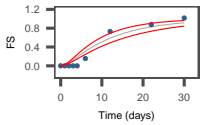

HW R2: 0.94 k: 0.303 dk: 0.095

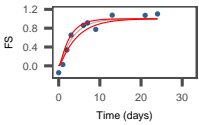

AA R2: 0.97 k: 0.186 dk: 0.0373

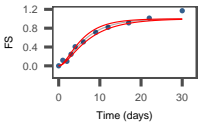

HW R2: 0.98 k: 0.153 dk: 0.0267

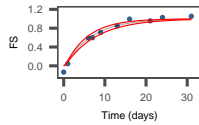

PYC – PGASLPPLNLK\_2

AA R2: 0.97 k: 0.142 dk: 0.0278

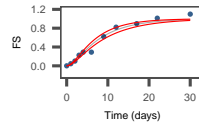

HW R2: 0.93 k: 0.0883 dk: 0.0193

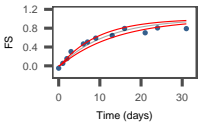

PSB3 – DAVSGMGVIVHVEIK\_3

AA R2: 0.97 k: 0.397 dk: 0.0938

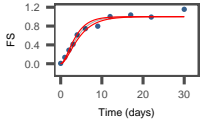

HW R2: 0.98 k: 0.26 dk: 0.036

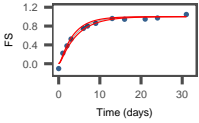

PYC – AYVEANQLMGDLIK\_2

AA R2: 0.97 k: 0.2 dk: 0.0392

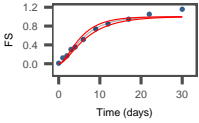

HW R2: 0.95 k: 0.254 dk: 0.0522

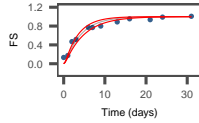

QCR2 – IENLHDVAYK\_2

AA R2: 0.97 k: 0.103 dk: 0.0184

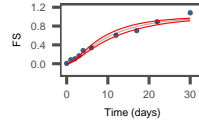

HW R2: 0.95 k: 0.109 dk: 0.0188

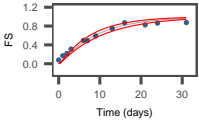

PSB4 – VNDSTMLGASGDYADFQYLK\_2

AA R2: 0.92 k: 0.398 dk: 0.165

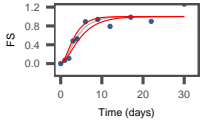

HW R2: 0.99 k: 0.281 dk: 0.0332

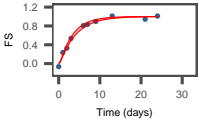

PYC – GLAPVQAYLHIPDIK\_2

AA R2: 0.91 k: 0.0775 dk: 0.0246

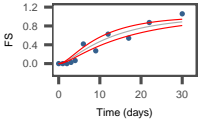

HW R2: 0.98 k: 0.14 dk: 0.0228

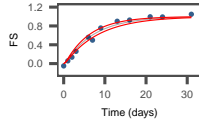

QCR2 – LASSLTK\_2

AA R2: 0.99 k: 0.107 dk: 0.0105

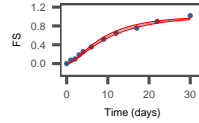

HW R2: 0.98 k: 0.0603 dk: 0.0071

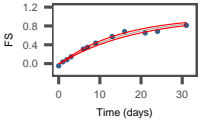

PTER – ILQEAGADISK\_2

AA R2: 0.97 k: 0.306 dk: 0.0681

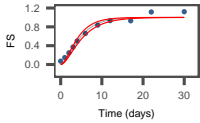

HW R2: 0.98 k: 0.187 dk: 0.0283

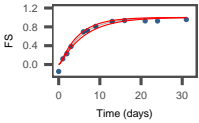

PYC – GLAPVQAYLHIPDIK\_3

AA R2: 0.98 k: 0.146 dk: 0.0211

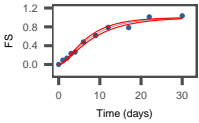

HW R2: 0.99 k: 0.157 dk: 0.0128

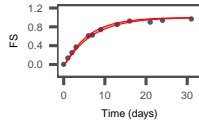

QCR2 – TSAAPGGVLPQDLEFTK\_2

AA R2: 0.97 k: 0.105 dk: 0.0187

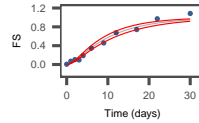

HW R2: 0.99 k: 0.0889 dk: 0.0089

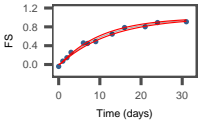

PUR8 – VLSQQAQAVVK\_2

AA R2: 0.98 k: 0.219 dk: 0.0365

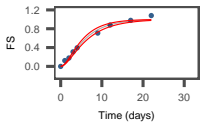

HW R2: 0.94 k: 0.151 dk: 0.0326

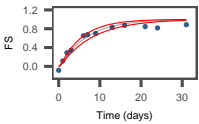

PYC – HGEEVTPEDVLSAAMPDVFAQFK\_3

AA R2: 0.92 k: 0.301 dk: 0.11

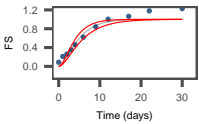

HW R2: 1 k: 0.145 dk: 0.00855

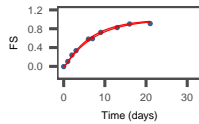

QCR7 – WYNYAAGFNK\_2

AA R2: 0.96 k: 0.14 dk: 0.0305

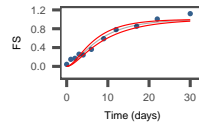

HW R2: 0.97 k: 0.0746 dk: 0.0102

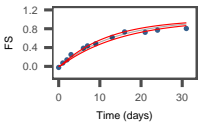

PXL2A – VNPLSVLEAVK\_2

AA R2: 0.96 k: 0.188 dk: 0.0438

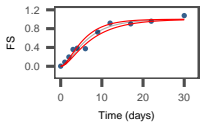

HW R2: 0.94 k: 0.247 dk: 0.0551

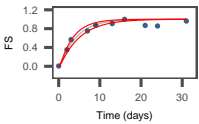

PYC – LDNASAFQGAIVSPHYDSLIVK\_2

AA R2: 0.96 k: 0.219 dk: 0.0576

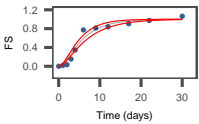

HW R2: 0.93 k: 0.155 dk: 0.0376

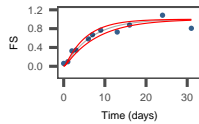

QCR8 – NPAMYENDK\_2

AA R2: 0.99 k: 0.126 dk: 0.0138

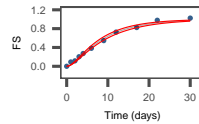

HW R2: 0.96 k: 0.0621 dk: 0.0118

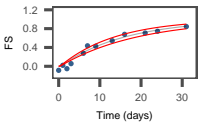

QOR - AAQAHEDIHSGK\_2

QOR - LVLQNGAHEVFNHK\_3

RAB5C - TAMNVNEIFMAIAK\_2

AA R2: 0.99 k: 0.229 dk: 0.0293

HW R2: 0.99 k: 0.175 dk: 0.0177

AA R2: 0.93 k: 0.163 dk: 0.046

HW R2: 0.98 k: 0.151 dk: 0.0189

AA R2: 0.96 k: 0.645 dk: 0.192

HW R2: 0.92 k: 0.558 dk: 0.12

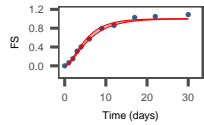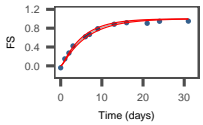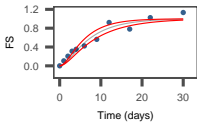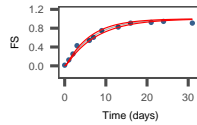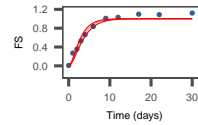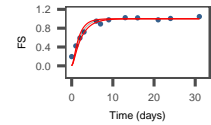

QOR - AAQAHEDIHSGK\_3

QOR - VFEEGGPEVLK\_2

RAB5C - TAMNVNEIFMAIAK\_3

AA R2: 0.98 k: 0.239 dk: 0.0361

HW R2: 0.99 k: 0.188 dk: 0.0135

AA R2: 0.98 k: 0.155 dk: 0.0215

HW R2: 0.97 k: 0.222 dk: 0.0346

AA R2: 0.98 k: 0.62 dk: 0.15

HW R2: 0.93 k: 0.295 dk: 0.0846

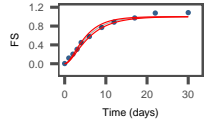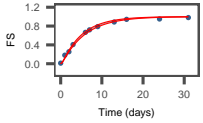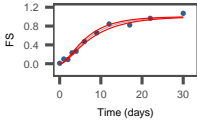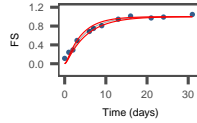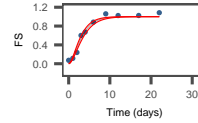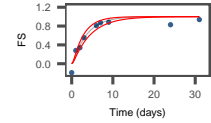

QOR - AAQAHEDIHSGK\_4

QORL2 - IVLFGAGGNIAVSPSNLLLLK\_2

RACK1 - IWDLEGK\_2

AA R2: 0.97 k: 0.263 dk: 0.0516

HW R2: 0.99 k: 0.186 dk: 0.0194

AA R2: 0.97 k: 0.124 dk: 0.0265

HW R2: 0.98 k: 0.103 dk: 0.0152

AA R2: 0.95 k: 0.206 dk: 0.0507

HW R2: 0.96 k: 0.213 dk: 0.0416

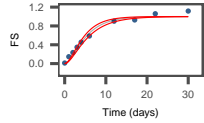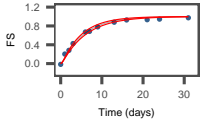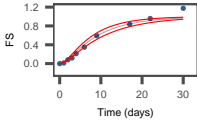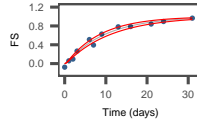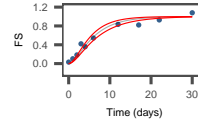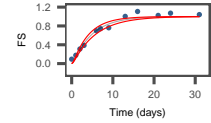

QOR - GVDVIEMLANENLNDLK\_3

RAB18 - IIQTPGLWESENQNK\_2

RALA - ADQWNVVYVETSAK\_2

AA R2: 0.95 k: 0.218 dk: 0.0628

HW R2: 0.99 k: 0.17 dk: 0.0151

AA R2: 0.96 k: 0.746 dk: 0.236

HW R2: 0.97 k: 0.623 dk: 0.0927

AA R2: 0.98 k: 0.101 dk: 0.0144

HW R2: 0.97 k: 0.147 dk: 0.0252

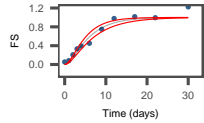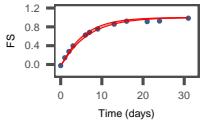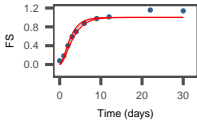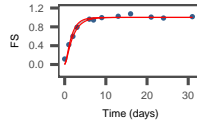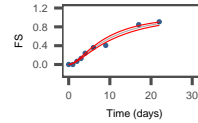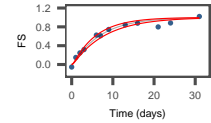

QOR - LQSDVVVPQSHQVLK\_2

RAB1A - EFADSLGIPFLESAK\_2

RAP1A(Non-Unique) - SALTQVQGFIVEK\_3

AA R2: 0.94 k: 0.174 dk: 0.0563

HW R2: 0.99 k: 0.175 dk: 0.0155

AA R2: 0.92 k: 0.554 dk: 0.234

HW R2: 0.99 k: 0.313 dk: 0.0271

AA R2: 0.97 k: 0.141 dk: 0.0294

HW R2: 0.99 k: 0.13 dk: 0.0116

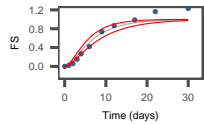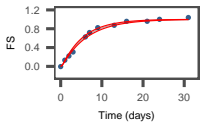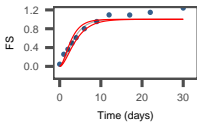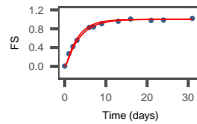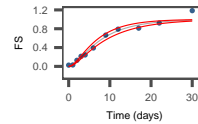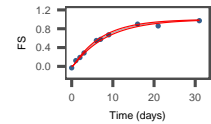

QOR - LQSDVVVPQSHQVLK\_3

RAB5C(Non-Unique) - LVLGSEAVGK\_2

RASH\_HUMAN,sp|P0856|RASN(Non-Unique) - LVVVGAGGVGK\_2

AA R2: 0.98 k: 0.243 dk: 0.0451

HW R2: 0.99 k: 0.197 dk: 0.0146

AA R2: 0.96 k: 0.58 dk: 0.161

HW R2: 0.98 k: 0.298 dk: 0.0424

AA R2: 0.98 k: 0.15 dk: 0.0182

HW R2: 0.98 k: 0.0887 dk: 0.0126

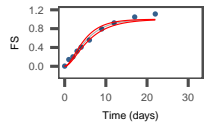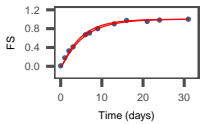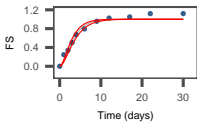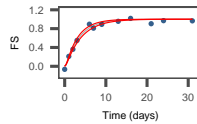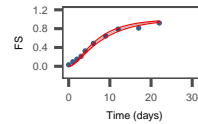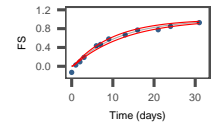

RB11B(Non-Unique) – DHADSNIVMLGNK\_3

AA R2: 0.96 k: 0.289 dk: 0.0644

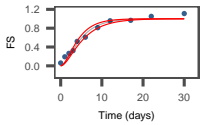

HW R2: 0.99 k: 0.214 dk: 0.021

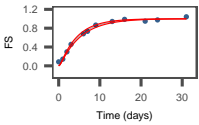

RIDA – TTVLLADMNDFGTVNEIYK\_3

AA R2: 0.91 k: 0.0785 dk: 0.0236

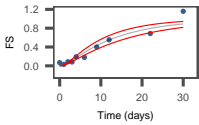

HW R2: 0.98 k: 0.189 dk: 0.0251

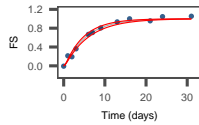

RL15 – FFEVILDPFHK\_3

AA R2: 0.96 k: 0.25 dk: 0.065

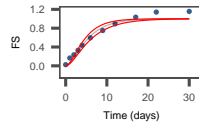

HW R2: 0.98 k: 0.128 dk: 0.0178

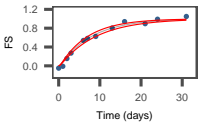

RB11B(Non-Unique) – GAVGALLVYDIAK\_2

AA R2: 0.98 k: 0.253 dk: 0.0457

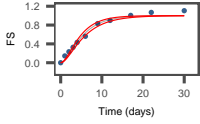

HW R2: 0.99 k: 0.229 dk: 0.0176

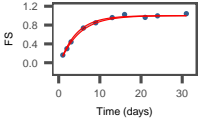

RIDA – VEIEIAIVQGPFIK\_2

AA R2: 0.98 k: 0.174 dk: 0.0276

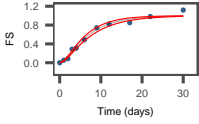

HW R2: 0.99 k: 0.178 dk: 0.0128

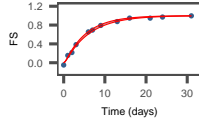

RL17 – GLDVDSLVIHQVNK\_3

AA R2: 0.97 k: 0.174 dk: 0.0331

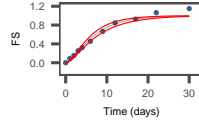

HW R2: 0.98 k: 0.187 dk: 0.029

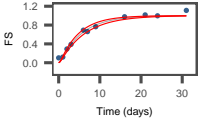

REEP5 – HESQVDSVVK\_2

AA R2: 0.95 k: 0.367 dk: 0.105

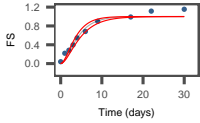

HW R2: 0.97 k: 0.297 dk: 0.0434

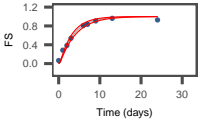

RL10L(Non-Unique) – GAFGKPGQTVAR\_3

AA R2: 0.96 k: 0.419 dk: 0.0966

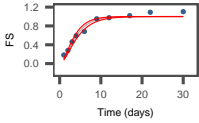

HW R2: 0.95 k: 0.222 dk: 0.0445

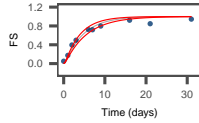

RL17 – SAEFLHMLK\_3

AA R2: 0.95 k: 0.211 dk: 0.0522

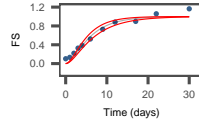

HW R2: 0.97 k: 0.101 dk: 0.0166

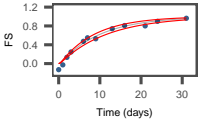

RENT1 – NVFLGFIPAK\_2

AA R2: 0.94 k: 0.682 dk: 0.216

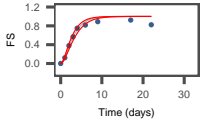

HW R2: 0.95 k: 0.272 dk: 0.0683

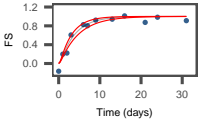

RL11 – VLEQLTGQTPVFSK\_2

AA R2: 0.95 k: 0.21 dk: 0.0632

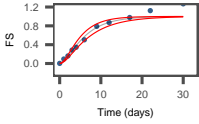

HW R2: 0.99 k: 0.151 dk: 0.0153

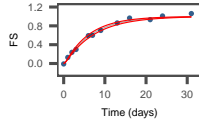

RL18 – ILTFDQLALESPK\_2

AA R2: 0.99 k: 0.182 dk: 0.0222

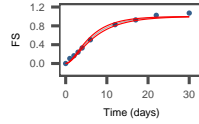

HW R2: 0.99 k: 0.14 dk: 0.0114

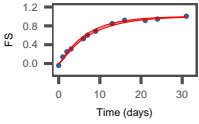

RETST – FLPLPLTQLLSK\_2

AA R2: 0.91 k: 1.92 dk: 1.59

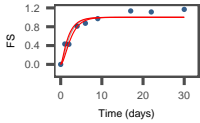

HW R2: 0.93 k: 0.562 dk: 0.16

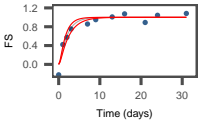

RL12 – QAQIEVPSASALIK\_2

AA R2: 0.98 k: 0.142 dk: 0.0249

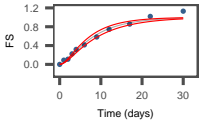

HW R2: 1 k: 0.113 dk: 0.00693

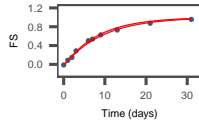

RL18 – TNSTFNQVVK\_2

AA R2: 0.98 k: 0.2 dk: 0.0373

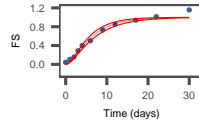

HW R2: 0.96 k: 0.0761 dk: 0.0131

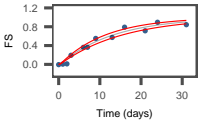

RIDA – TIYISQVGLDPSSGQLVPGGVVEAK\_2

AA R2: 0.93 k: 0.156 dk: 0.0505

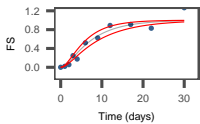

HW R2: 0.98 k: 0.162 dk: 0.021

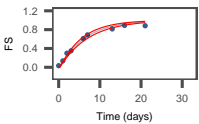

RL13A – YQAVTATLEEK\_2

AA R2: 0.96 k: 0.148 dk: 0.0287

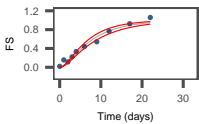

HW R2: 0.98 k: 0.151 dk: 0.0209

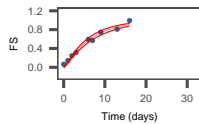

RL28 – TVGVEPAADGK\_2

AA R2: 0.96 k: 0.224 dk: 0.0665

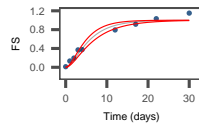

HW R2: 0.99 k: 0.143 dk: 0.0153

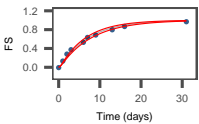





RS11 – QPTIFQNK\_2

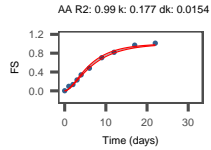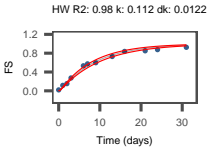

RS2 – ESEIDFFLGASKL\_2

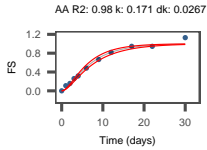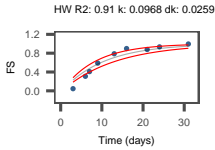

RS3 – FGFPEGSVELYAEK\_2

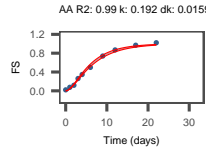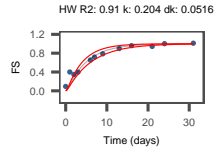

RS15A – MNVLADALK\_2

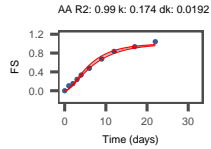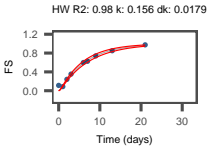

RS2 – GTGIVSAPVK\_2

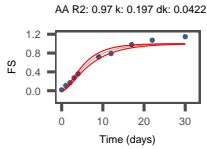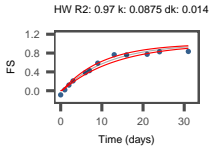

RS3 – QGVLGK\_2

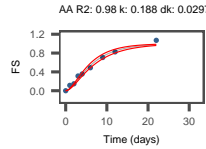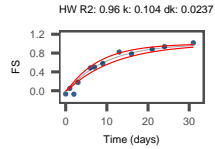

RS16 – LLEPVLGK\_2

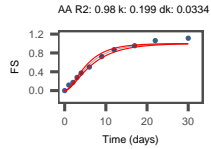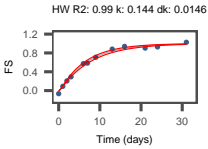

RS2 – SPYQFTDHLVK\_3

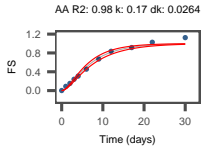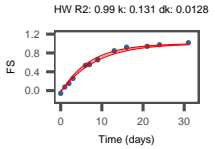

RS7 – AIIHFVPPQLK\_2

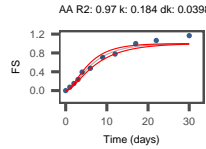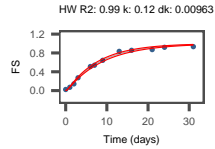

RS17 – LLDFGSLNQLVTPQTMNFK\_2

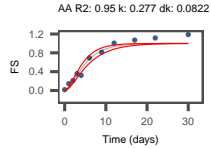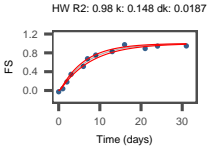

RS23 – VANVSLLYK\_2

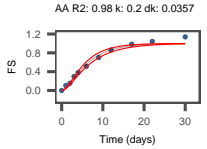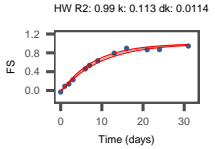

RSSA – FLAAGTHLGGTNLDFQMEQYIYK\_3

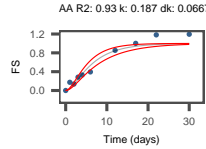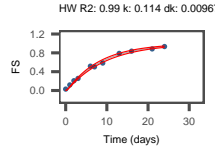

RS17 – LLDFGSLNQLVTPQTMNFK\_3

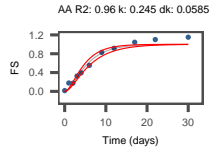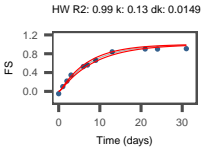

RS24 – TTGFGMIYDSLDAK\_2

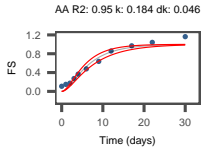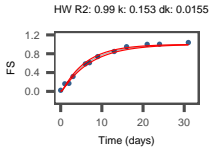

RT36 – KPMSQEEMFIQR\_3

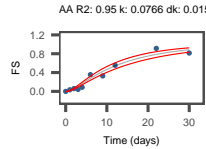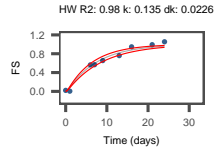

RS19 – VLQALEGLK\_2

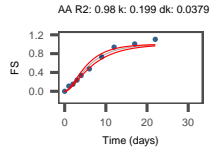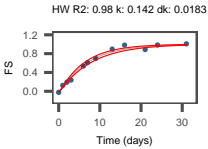

RS25 – AALQELSK\_2

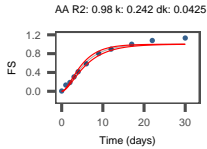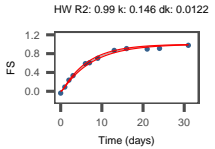

S100G – LLIQEFPPLK\_2

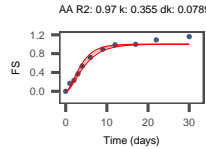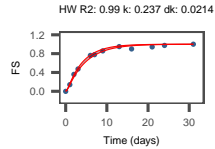

**S10A1 – DLLQTELSGFLDVQK\_2****S27A2 – ENYEFNGK\_2****S27A2 – VTLMEEGFNPTVIK\_2**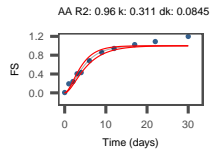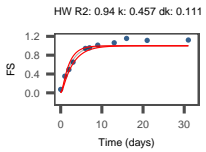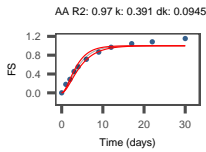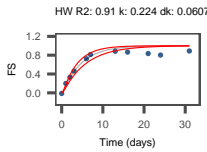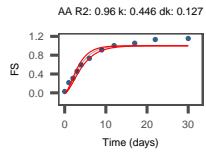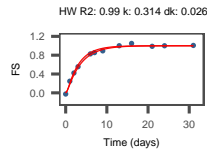**S10A1 – DLLQTELSGFLDVQK\_3****S27A2 – IQDTIEITGTFK\_2****S27A2 – YDVEKDEPVR\_2**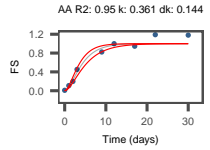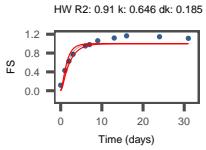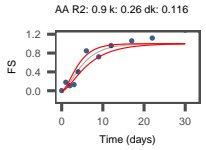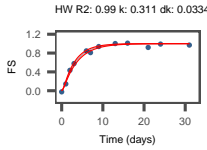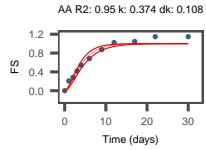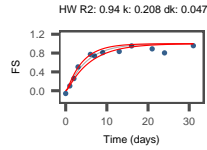**S22A6 – DGGLEAWLPLDK\_2****S27A2 – SEVTFITPAVIYITSGTTGLPK\_2****S27A2 – YDVEKDEPVR\_3**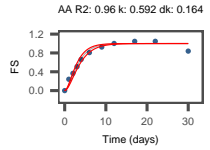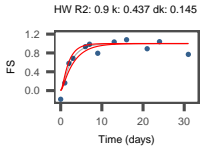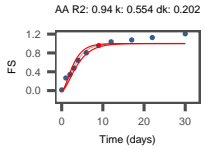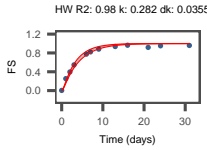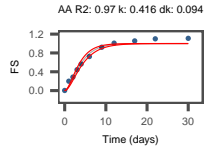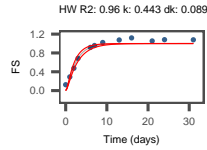**S22A6 – LSIIEVLTSLQK\_2****S27A2 – TFPVMTENIYNAIDK\_3****S27A2 – YLCNTPQKPNDR\_3**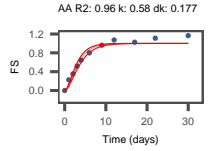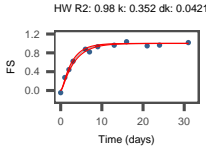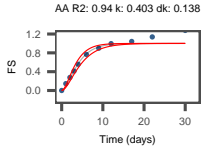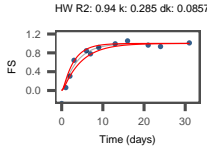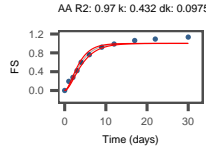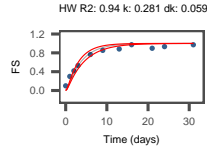**S22A1 – VLPVFLVK\_2****S27A2 – VLLASPDLQAEVEVLPTLK\_2****S4A4 – FLFILLGPK\_2**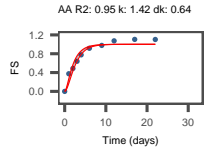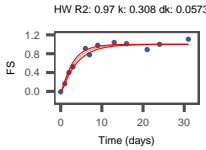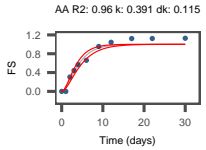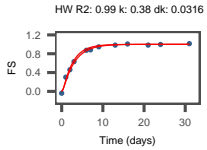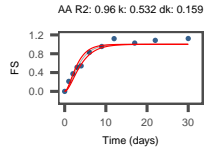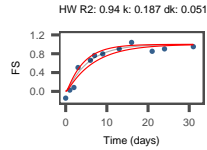**S23A1 – SYDFPFMGGMVK\_2****S27A2 – VLLASPDLQAEVEVLPTLK\_3****S4A4 – LADYPIINSDFK\_2**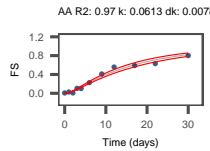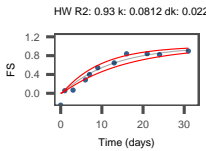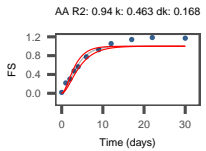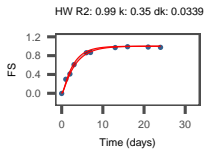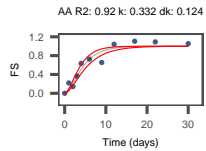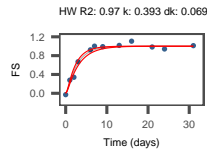

S4A4 - METETSAPGEQPK\_2

SAHH - VPAINVDSVTK\_2

SBP1 - LYATTSLSYAWDK\_2

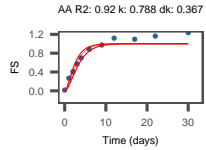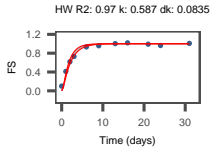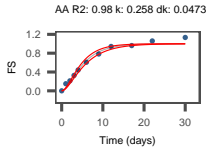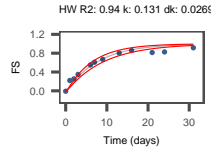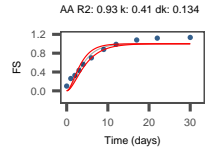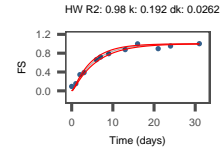

SAHH - AGIPVFAWK\_2

SARDH - AYGIESHVLSPAETK\_2

SBP1 - NAEGTWSVEK\_2

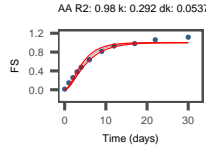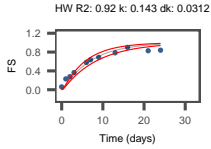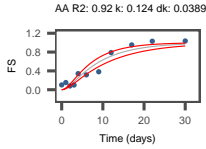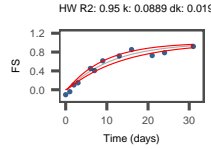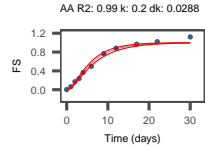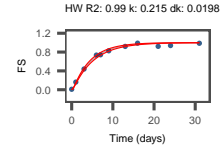

SAHH - GISEETTGVHNLK\_2

SARDH - AYGIESHVLSPAETK\_3

SBP1(Non-Unique) - NTGTEAPDYLATVDVDPK\_2

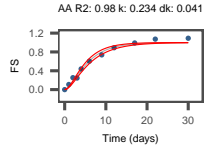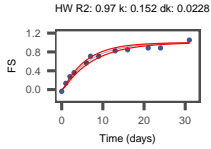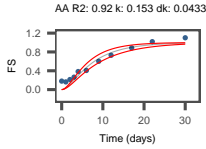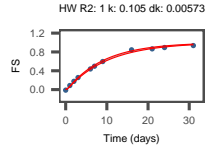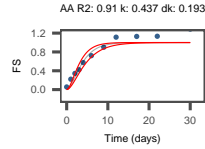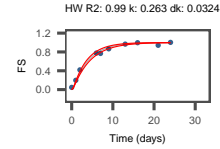

SAHH - VAVVAGYDVGK\_2

SARDH - LQGDALSVGGYEANPIFWEEVSDK\_2

SBP1(Non-Unique) - QYDISNPQKPR\_2

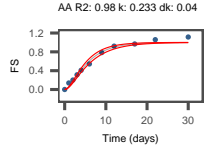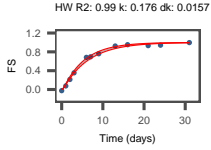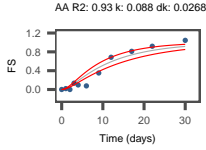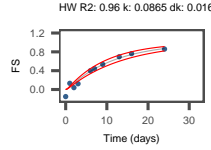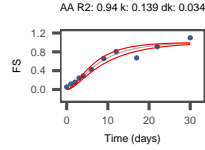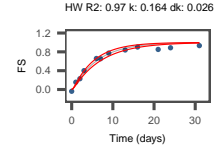

SAHH - VNIKPQVDR\_2

SBP1 - GTWEKPGDAAPMGYDFWYQPR\_3

SC31A - MADAILAIAGGQELLAQTQK\_3

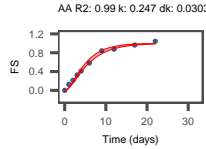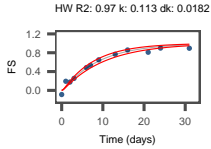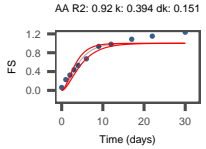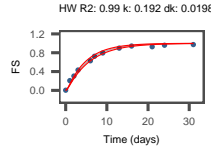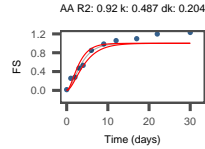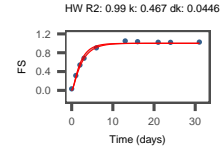

SAHH - VNIKPQVDR\_3

SBP1(Non-Unique) - IPGGPQMIQLSLDGK\_2

SCOT1 - AAGTTVVEEIVDIGSFAPEDIHPIK\_3

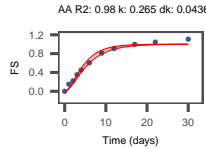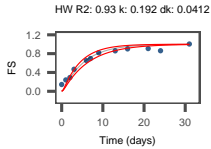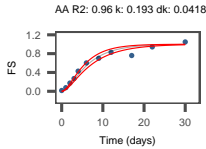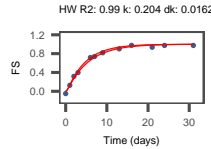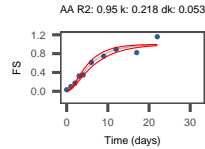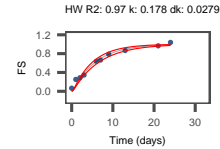

SCOT1 – FYTDPVEAVK\_2

SCP2 – GSVLPNSDK\_2

SDHA – WHFYDTVK\_3

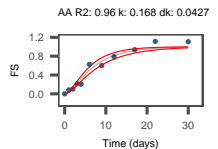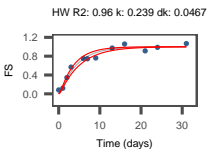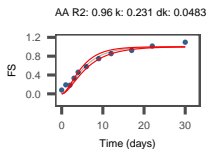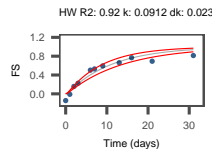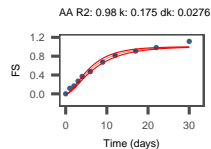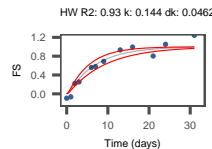

SCOT1 – GMGGAMDLVSSK\_2

SCP2 – IGGIFAFK\_2

SDHB – DLVPDLSNFYAQYK\_2

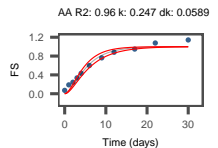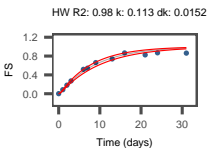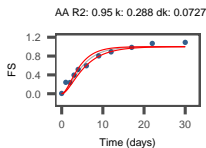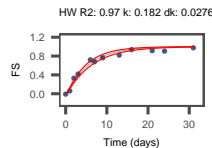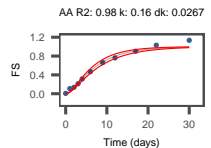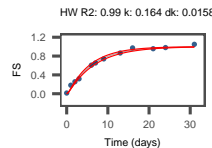

SCOT1 – VVVTMEHSAK\_2

SCP2 – LQNLQLQPGK\_2

SFXN1 – YAYDSAFHPDTGEK\_3

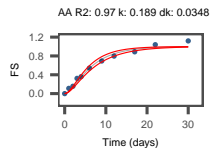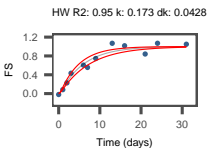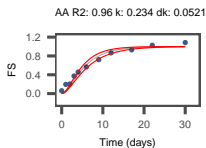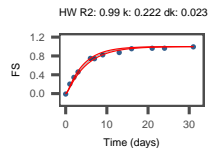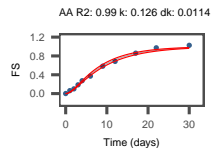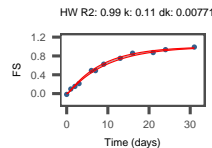

SCOT1 – YGDLANWMPGK\_2

SDHA – ANAGEESVMMLDK\_2

SLC31 – DFENLVAIHKD\_3

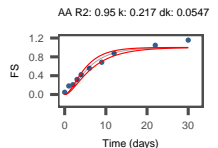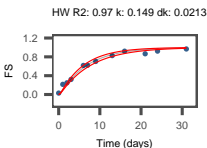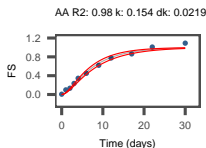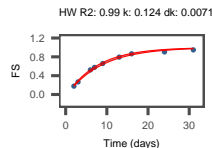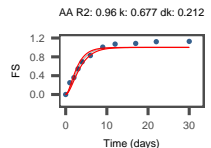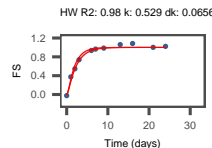

SCP2 – ADCTITMADSLLALMTGK\_2

SDHA – KPFGHEWR\_3

SLC31 – TMMYGLPFIQEADFPNK\_2

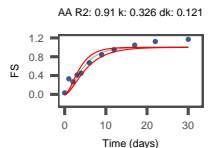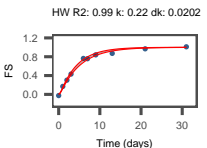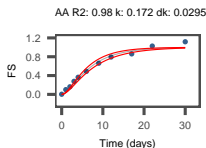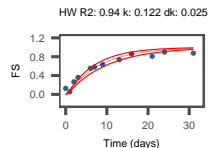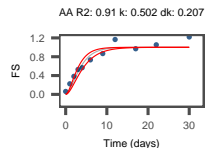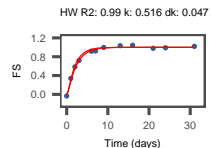

SCP2 – ADCTITMADSLLALMTGK\_3

SDHA – VGSVLQEGCEK\_2

SMD3 – FLILPDLK\_2

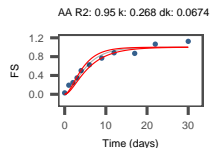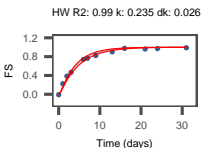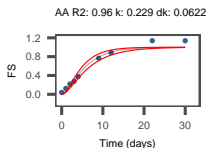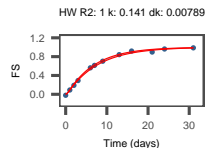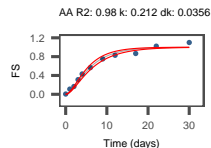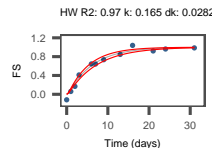

**SND1 – VITEYLNAQESAK\_2**

**SODM – HHAAYVNNLNATEEK\_4**

**SPTN1 – DLSSVQTLTK\_2**

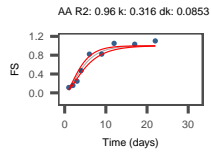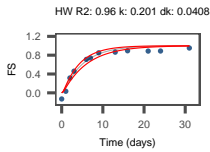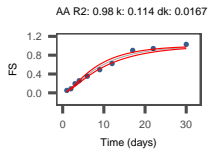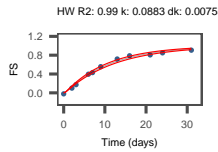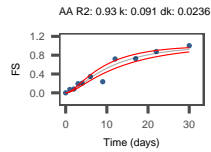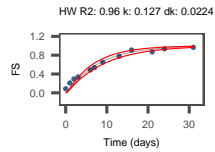

**SODC – GDGPVQGTIHFEQK\_2**

**SODM – YHEALAK\_2**

**SPTN1 – DMDDEESWIK\_2**

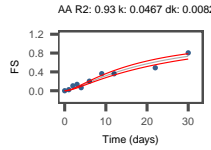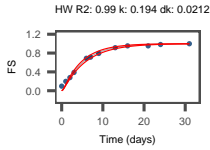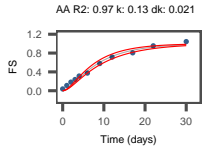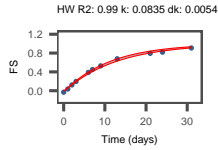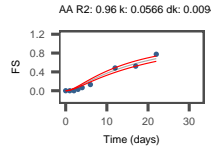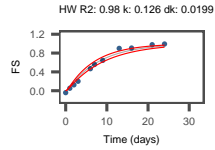

**SODC – GDGPVQGTIHFEQK\_3**

**SPA3K(Non-Unique) – DLQLAEFHEK\_3**

**SPTN1 – EKEPIAASTNR\_3**

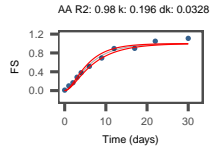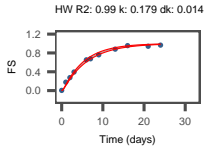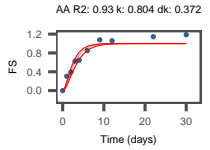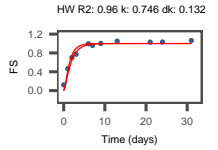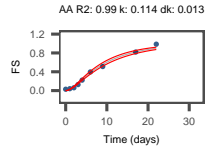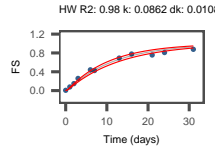

**SODC – HVGDLGNVTAGK\_2**

**SPTB2 – HLLGVEDLLQK\_3**

**SPTN1 – IAALQAFADQLIADVHYAK\_3**

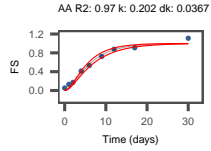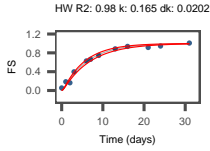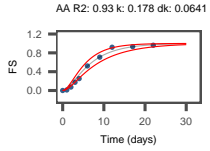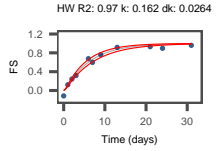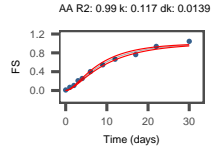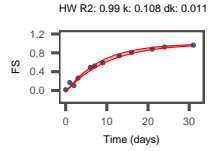

**SODM – GDVTTQVALQPALK\_2**

**SPTB2 – LQALDTGWNELHK\_3**

**SPTN1 – KQEALVAR\_2**

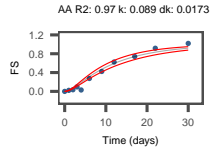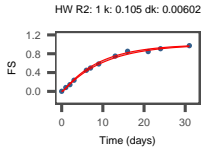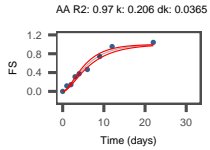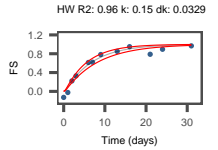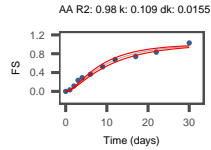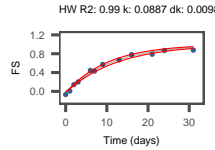

**SODM – GELLEAIK\_2**

**SPTB2 – NEIDNYEEDYQK\_2**

**SPTN1 – LQSHPLSASQIVK\_3**

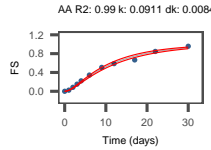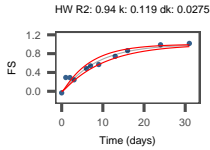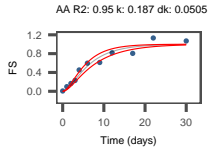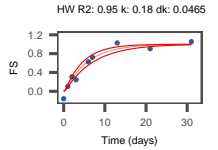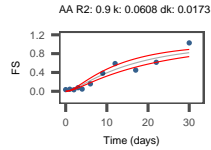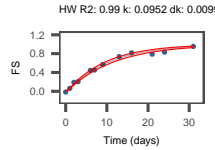

SQOR – ANIIFNTALGTIFGVK\_2

ST1D1 – THLPVQLLPSSFWK\_3

SUCA – MGHAGAIAGGK\_3

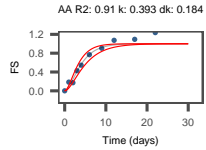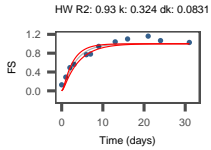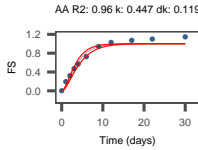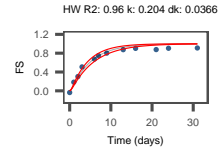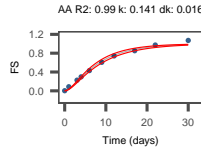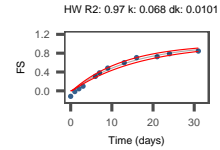

SQOR – ANIIFNTALGTIFGVK\_3

STIP1 – LLEFLQALK\_2

SUCA – QGTFHSQQALEYGTK\_2

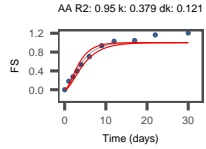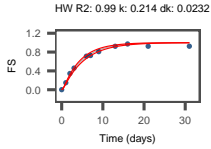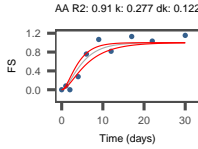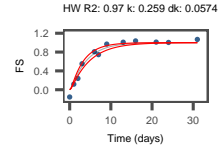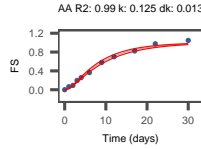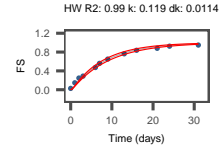

ST1C2 – VSWGSWFDHVK\_3

SUCA – AKPVVSIAGITAPGR\_3

SUCA – QGTFHSQQALEYGTK\_3

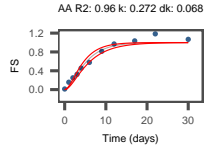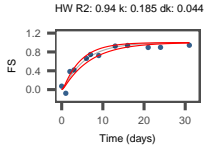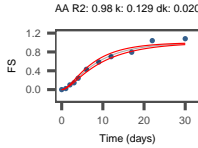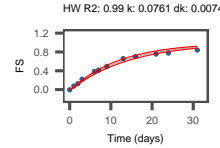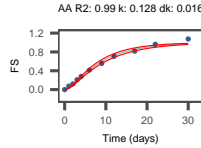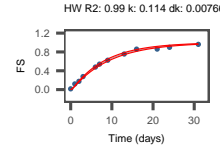

ST1D1 – FEEDYVK\_2

SUCA – HGLPVPFNTVK\_3

SUCCB1 – ALIADSLGK\_2

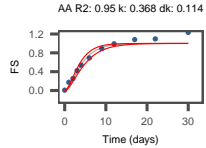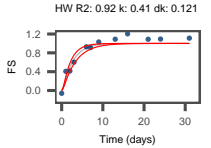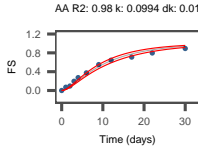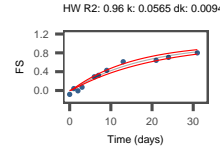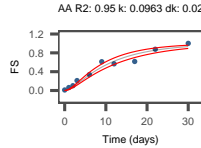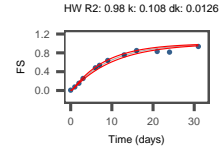

ST1D1 – FMAGQVSGFPWYDHVK\_3

SUCA – ISALQSAGVIVSMSPAQLGTTIYK\_2

SUCCB1 – EQAVTLAQK\_2

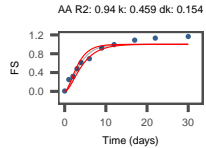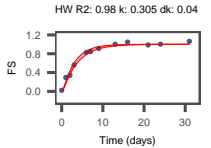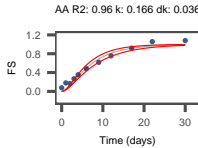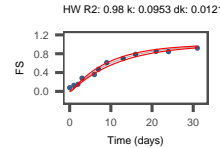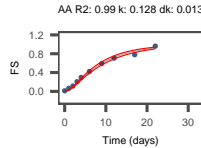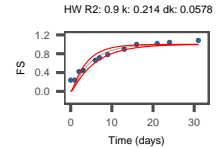

ST1D1(Non-Unique) – ILYLFYEDMK\_2

SUCA – MGHAGAIAGGK\_2

SUCCB1 – LHGGTPANFLDVGGGATVQQVTEAFK\_3

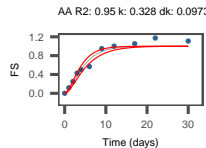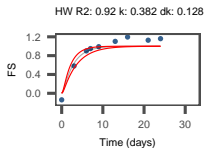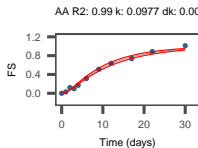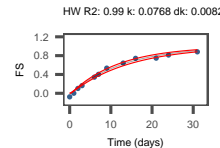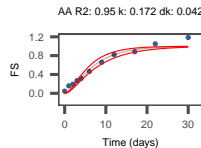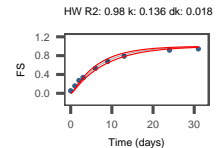

SUCB1 – LSEIVTLAK\_2

SUSD2 – VLSFTEQNWMDLK\_2

TALDO – LFLVFGAELK\_2

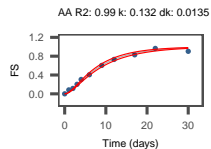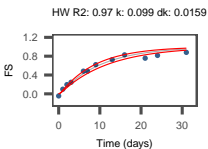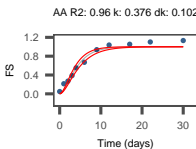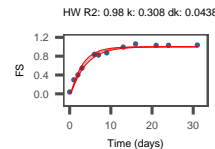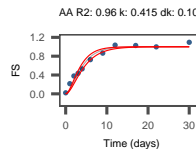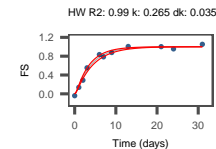

SUCB1 – LYNLFLK\_2

SYEP – SQSGLSGGGAGEGQGPK\_2

TALDO – LGGPQEEQIK\_2

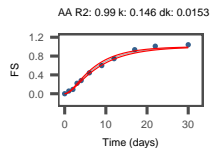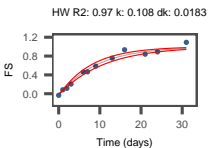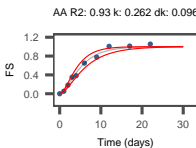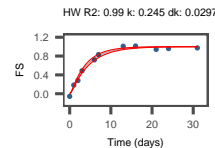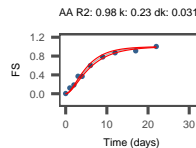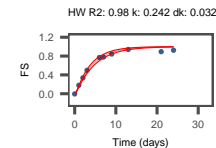

SUCB2 – EAQVYFAFK\_2

SYFA – SIPLEGLVQSELMHLPSPGK\_3

TALDO – SYEPQEDPGVK\_2

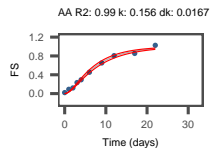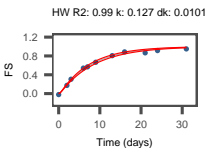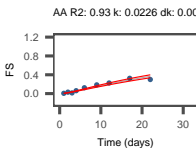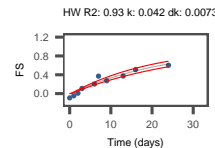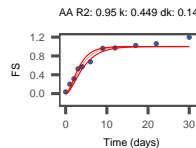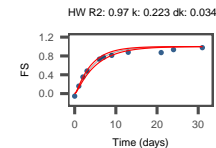

SUCB2 – SSGLPITSAVDLEDAAK\_2

TADBP – TSDLIVLGLPWK\_2

TALDO – WLHNEDQMAVEK\_3

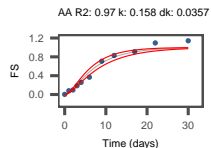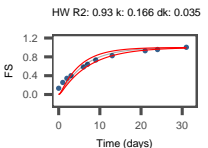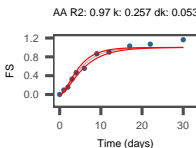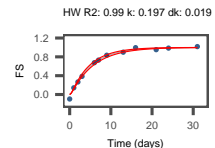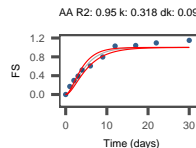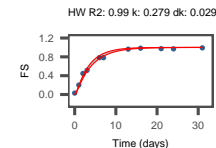

SUCB2 – VVGELAQMGIGNLATK\_2

TAGL2 – DDGLFSGDPNWFPK\_2

TBA1B(Non-Unique) – IHFLATYAPVISA EK\_2

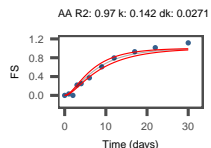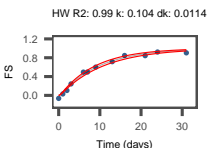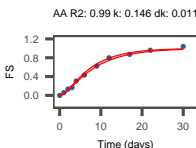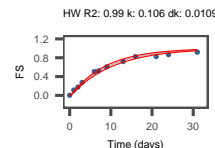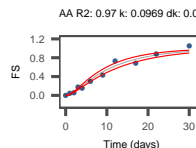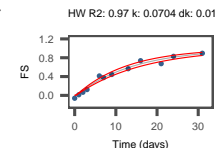

SUSD2 – GMFLSVAQDK\_2

TAGL2 – YGINTTDIFQTVDLWEGK\_2

TBA1B(Non-Unique) – IHFLATYAPVISA EK\_3

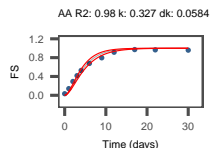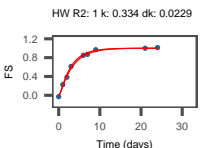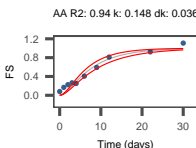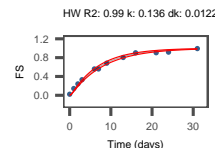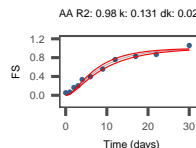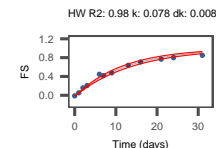

TBA1B(Non-Unique) – QLHFPEQLITGK\_3

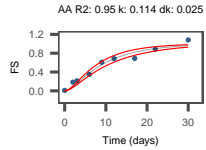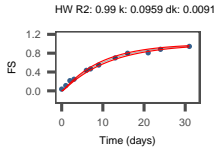

TBB4B(Non-Unique) – SLGGGTSGMGMLLISK\_2

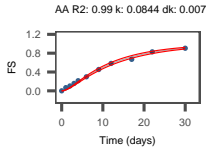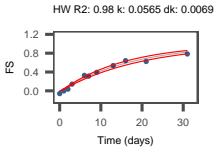

TERA – IVSLLTLMDGLK\_2

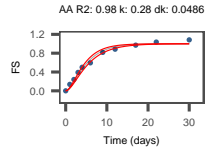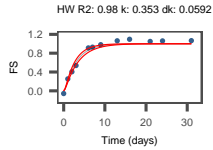

TBA1B(Non-Unique) – TIGGGDSFNFFSETGAGK\_2

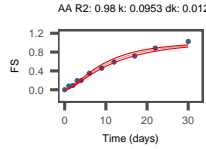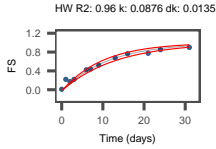

TCPA – MLVDDIGDVITINDGATILK\_2

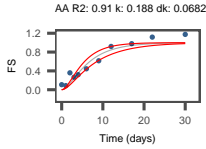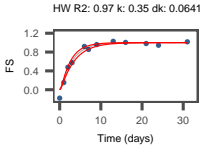

TGM2 – VDLFPTDGLHK\_3

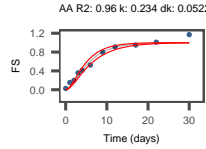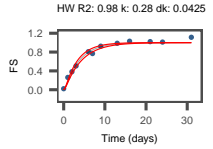

TBA1B(Non-Unique) – VGINYQPPTVPGDLAK\_2

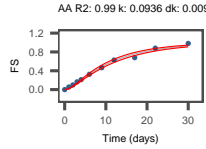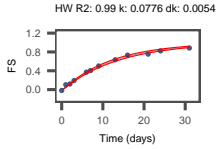

TCPA – TLAVNAAQDSTDLVAK\_2

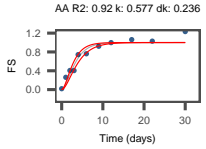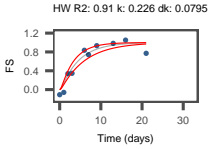

THIKA – AEIVPTTTVLDDK\_2

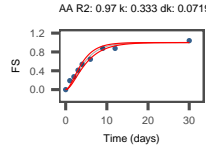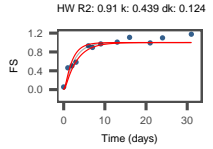

TBB4B(Non-Unique) – ALTVPELTQQMFDK\_3

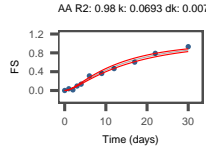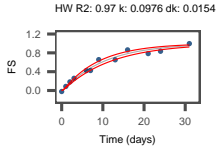

TCPA – WIGLDLVHGK\_3

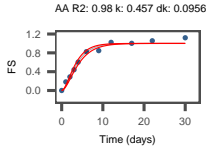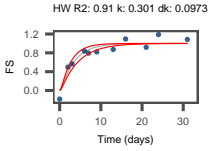

THIL – ASKPTLNEVVIVSAIR\_2

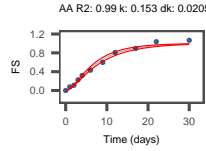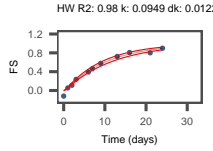

TBB4B(Non-Unique) – EVDEQMLNVQNK\_2

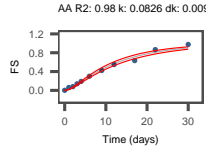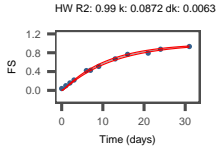

TCPD – DALSDLALHFLNK\_3

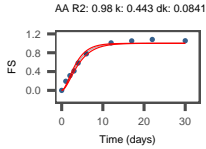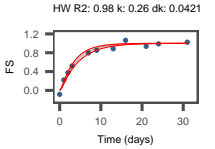

THIL – GATPYGGVK\_2

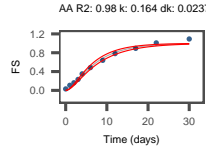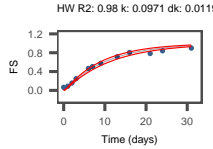

TBB4B(Non-Unique) – MSATFIGNSTAIQELFK\_3

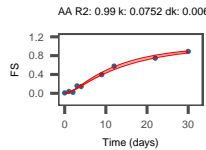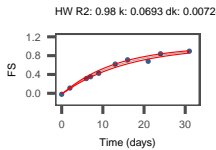

TCPH – LLDVVHPAAK\_3

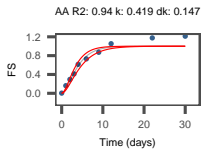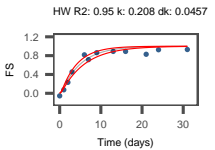

THIL – IAAFADAAVDPIDFLAPAYAVPK\_2

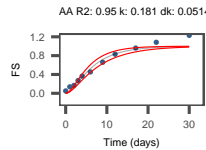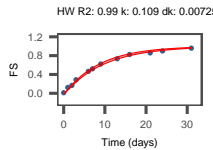



THIL - IAAFADAVPIDFPLAPAYVPK\_3

THIL - TPIGSLGLASQATK\_3

TIM50 - VLLDLSAFLK\_2

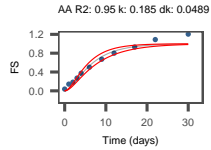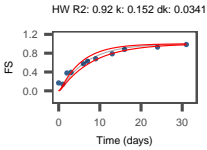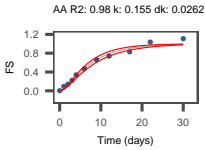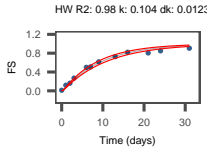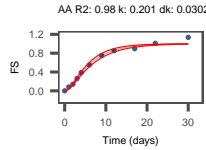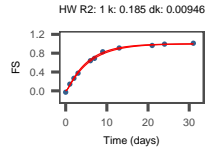

THIL - LGTAAIQGAEK\_2

THIM - DMMLIDVNEAFAPQFLSVQK\_2

TKFC - AVAQAGTVGTLIIK\_2

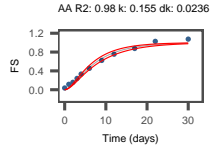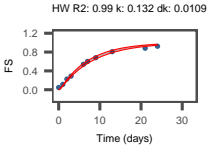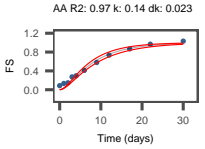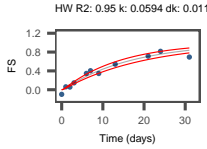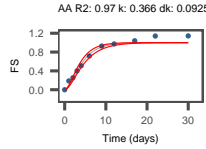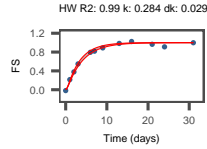

THIL - LNVKPLAR\_2

THIM - DMMLIDVNEAFAPQFLSVQK\_3

TKFC - MGGSSGALYGLFTAAQPLK\_2

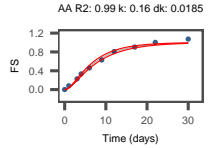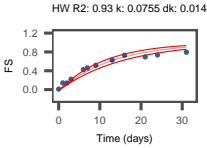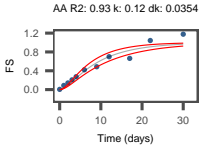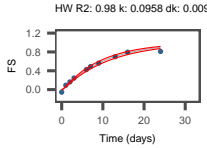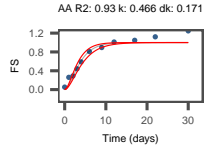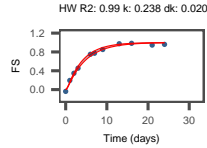

THIL - MLEIDPQK\_2

THIM - LEDTLWAGLTDQHVK\_3

TKFC - TMLDSLWAAAEQFQAWK\_3

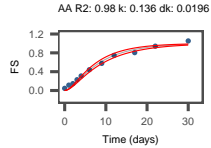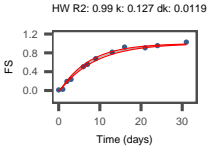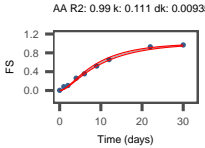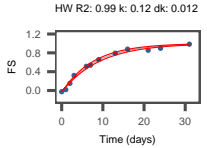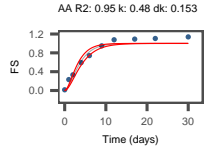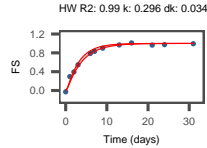

THIL - QATLGAGLPSTPCTTVNK\_2

THTR - ATLNLSLLK\_2

TKT - AVELAANTK\_2

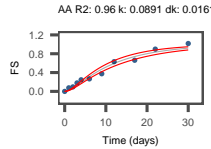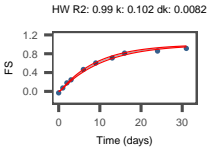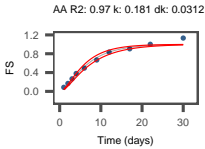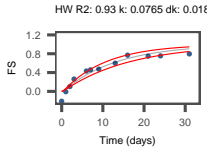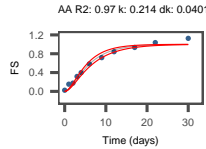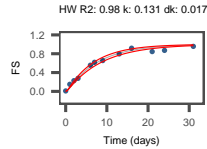

THIL - TPIGSLGLASQATK\_2

THTR - GSVNMPMFDFLTK\_2

TKT - GITGIEDK\_2

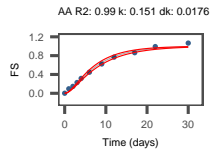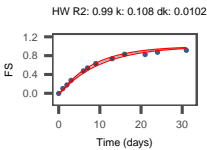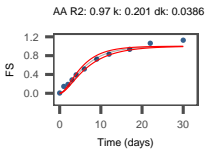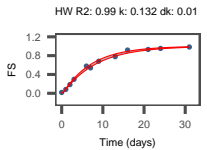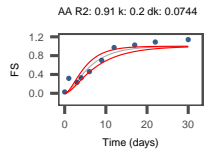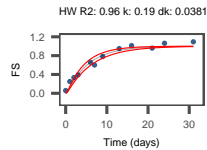

**TKT – HQPTAIIAK\_2**

**TMM19 – TGLVSSPTQETK\_2**

**TPMT – EFQYLVAVLSYDPTK\_2**

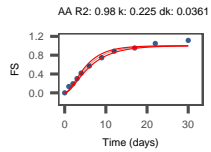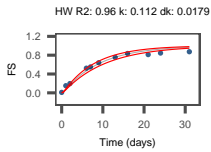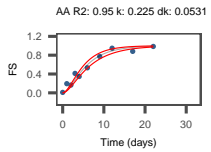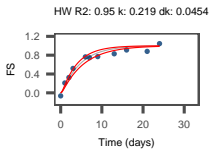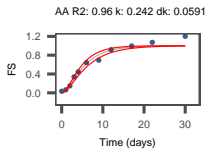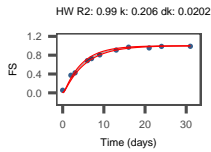

**TKT – IIALDGTK\_2**

**TOM40 – MQDTSASFYQLDLPK\_2**

**TRAP1 – AFLEALQNAETSSK\_2**

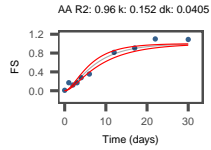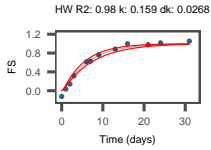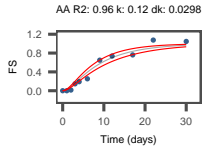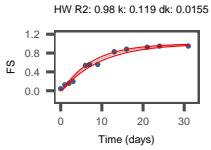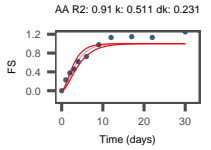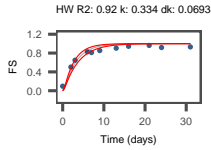

**TKT – LGQSDPAPLQHVDIYQK\_2**

**TPIS – FVGGNWK\_2**

**TRFE – DFQLFSSPLGK\_2**

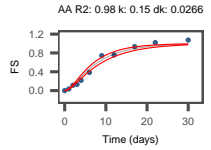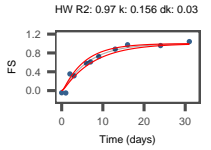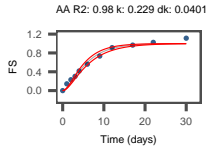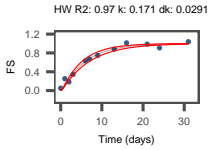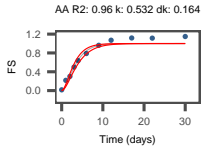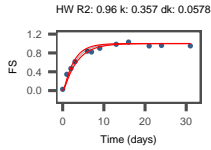

**TKT – LGQSDPAPLQHVDIYQK\_3**

**TPIS – TATPQQAQEVHEK\_2**

**TRFE – EDLIWEILK\_2**

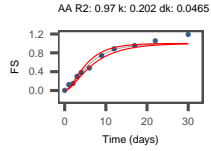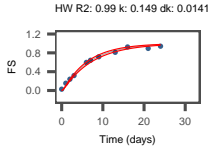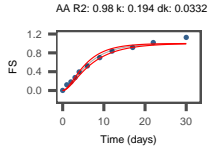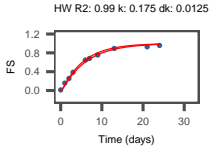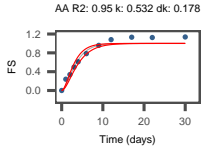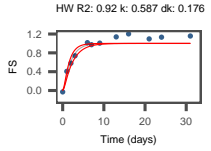

**TKT – NSTFSELFK\_2**

**TPIS – TATPQQAQEVHEK\_3**

**TRFE – HTTIFEVLEPK\_2**

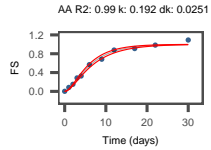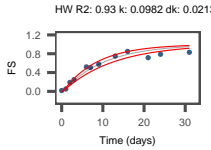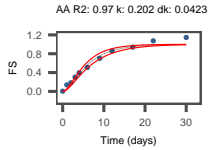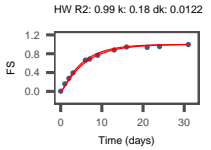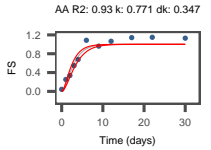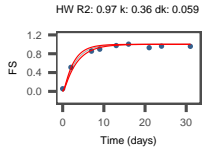

**TLN1 – GVGAAATAVTQALNELLQHVK\_3**

**TPIS – VVLAYEPVWAGTGK\_3**

**TRFE – LPEGTTPEK\_2**

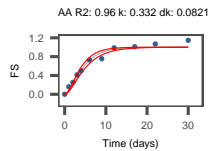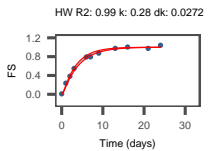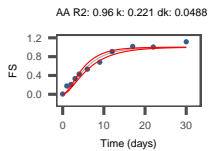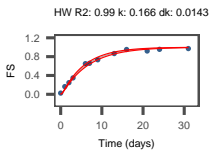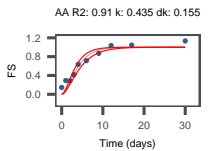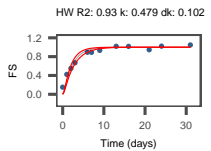



VATB2 - AVVGEALTSDDLLYLEFLQK\_2

VDAC1 - GALVLYGEGWLAGYQMNFFETSK\_2

VDAC2 - GFGFGLVK\_2

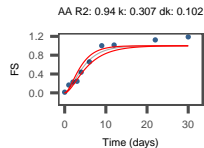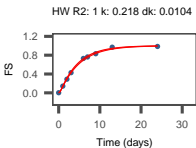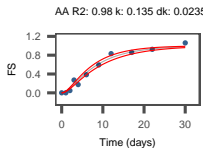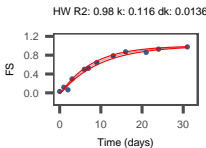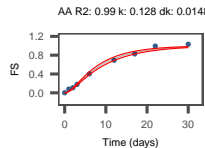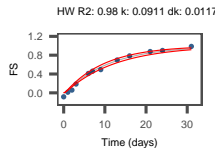

VATB2 - AVVQVFEGTSGIDAK\_2

VDAC1 - GYGFGLIK\_2

VDAC2 - LTFDFTFSPTNGK\_2

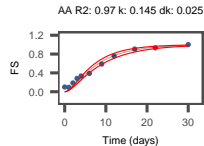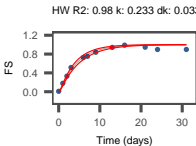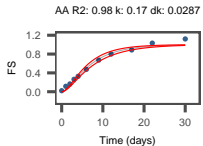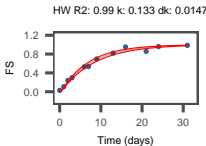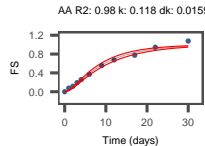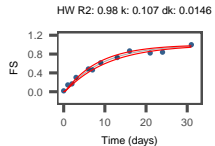

VATB2 - SGQVLEVSQK\_2

VDAC1 - KLETAVNLAWTAGNSNTR\_2

VDAC3(Non-Unique) - LTLALIDGK\_2

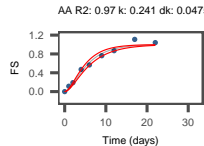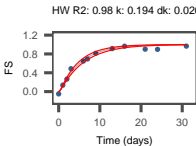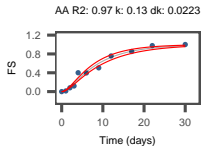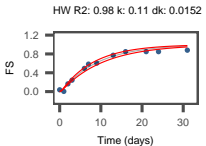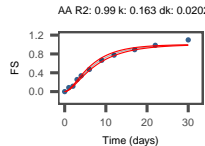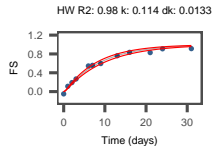

VATE1 - ARDDLITDLLNEAK\_3

VDAC1 - TDEFQLHTNVNDGTEFGGSYQK\_2

VDAC3 - WNTDNTLGTSEIWENK\_2

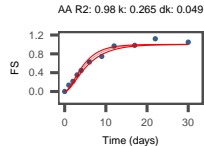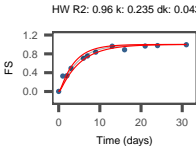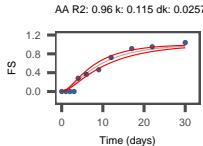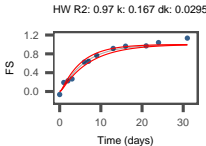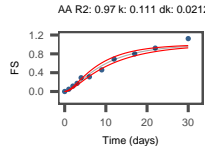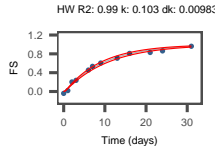

VATH - LGESVQDLSSFDEYSSELK\_2

VDAC1 - WTEYGLTFTEK\_2

VILI - AAATTVQEYLK\_2

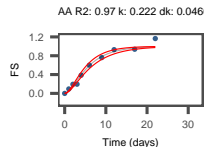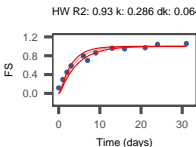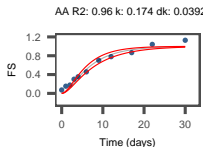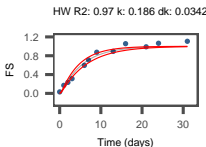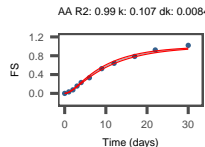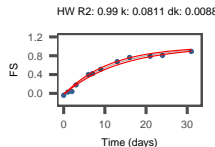

VATH - YNIIPVLDLQESVK\_2

VDAC1 - YQVDPDACFSK\_2

VILI - AAISDVVEPAK\_2

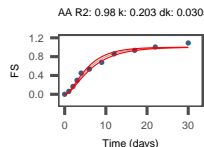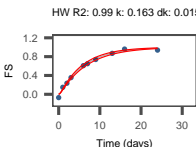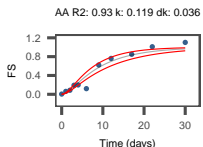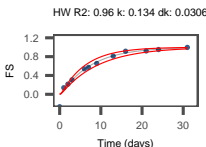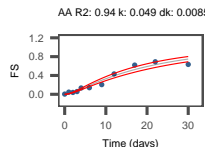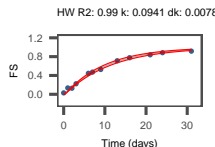

VILI – EPPHLSMIFK\_3

AA R2: 0.97 k: 0.122 dk: 0.0228

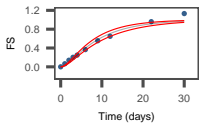

HW R2: 0.97 k: 0.0584 dk: 0.0081

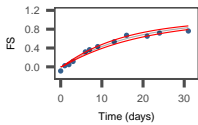

AA R2: 0.98 k: 0.0944 dk: 0.0134

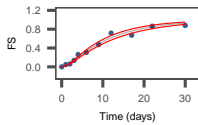

HW R2: 0.97 k: 0.0584 dk: 0.0087

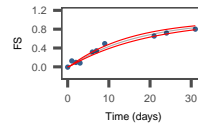

XYLB – WQALDLILGK\_2

AA R2: 0.98 k: 0.244 dk: 0.0452

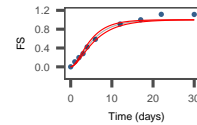

HW R2: 0.97 k: 0.192 dk: 0.0383

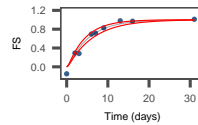

VILI – FDALTMHVQPVAQAQK\_3

AA R2: 0.93 k: 0.133 dk: 0.036

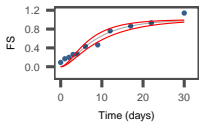

HW R2: 0.99 k: 0.105 dk: 0.00921

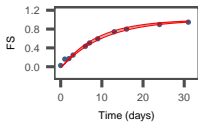

AA R2: 0.99 k: 0.0884 dk: 0.0101

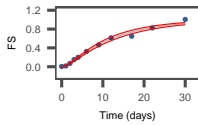

HW R2: 0.99 k: 0.0642 dk: 0.0060

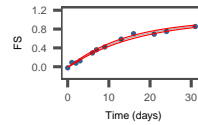

YBOX1 – GAEAAANTGPGGVPVQGSK\_2

AA R2: 0.9 k: 0.688 dk: 0.34

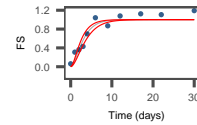

HW R2: 0.93 k: 0.442 dk: 0.0931

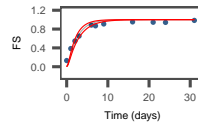

VILI – KNNLEPVPSTR\_2

AA R2: 0.99 k: 0.13 dk: 0.0168

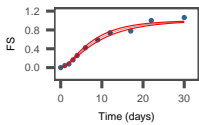

HW R2: 0.98 k: 0.0617 dk: 0.0062

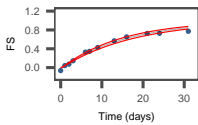

AA R2: 0.99 k: 0.0847 dk: 0.00802

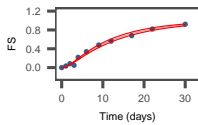

HW R2: 0.95 k: 0.091 dk: 0.0155

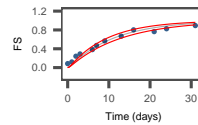

VILI – KNNLEPVPSTR\_3

AA R2: 0.99 k: 0.128 dk: 0.00842

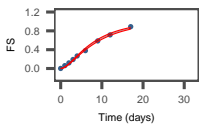

HW R2: 0.99 k: 0.0761 dk: 0.0079

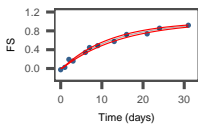

AA R2: 0.97 k: 0.12 dk: 0.0191

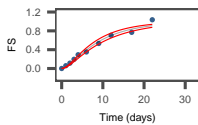

HW R2: 0.98 k: 0.174 dk: 0.0234

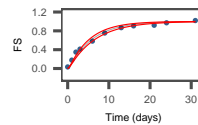

VILI – LYHVSDEGK\_3

AA R2: 0.95 k: 0.0236 dk: 0.0023

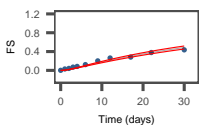

HW R2: 0.99 k: 0.0848 dk: 0.0058

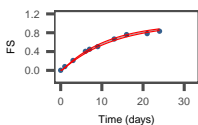

AA R2: 0.99 k: 0.195 dk: 0.0244

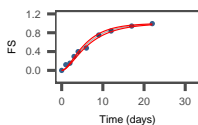

HW R2: 0.95 k: 0.137 dk: 0.0315

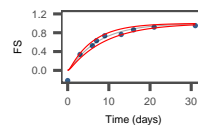

VILI – QVVVEGQEPANFWMALGGK\_2

AA R2: 0.92 k: 0.065 dk: 0.0151

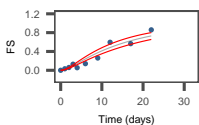

HW R2: 0.93 k: 0.109 dk: 0.0243

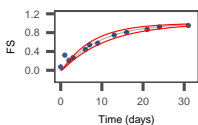

AA R2: 0.97 k: 0.332 dk: 0.0756

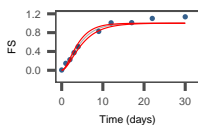

HW R2: 0.98 k: 0.183 dk: 0.0241

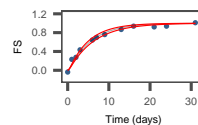

XYLB – ILATGGASHNK\_3

AA R2: 0.92 k: 0.065 dk: 0.0151



HW R2: 0.93 k: 0.109 dk: 0.0243



AA R2: 0.97 k: 0.332 dk: 0.0756



HW R2: 0.98 k: 0.183 dk: 0.0241



Supplement: mmc3.pdf [file mmc3.pdf]
