# Supplementary material for: Harmonizing Labeling and Analytical Strategies to Obtain Protein Turnover Rates in Intact Adult Animals
Source: PubMed Central journal article supplement (PMC9249856; doi:10.1016/j.mcpro.2022.100252), 2022-05-28

1433B – TAFDDAIAELDTLNEESYK\_2

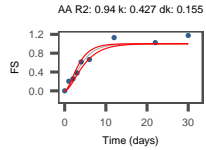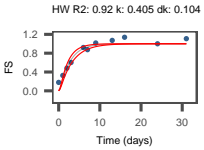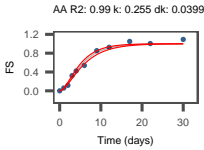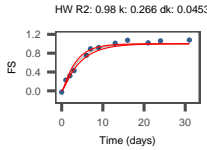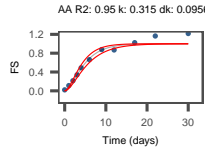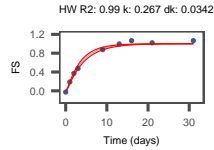

1433E – AAFDDAIAELDTLSEESYK\_3

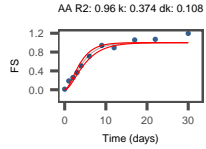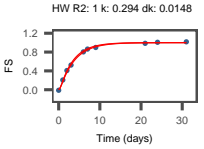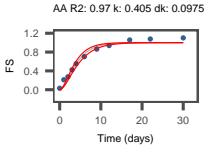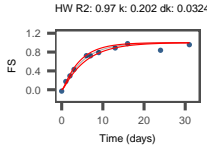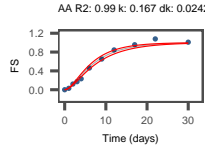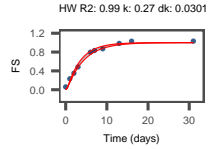

1433E – LICCDILDVLDK\_2

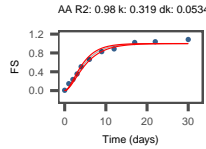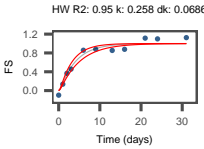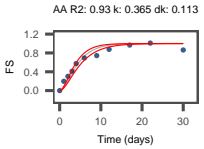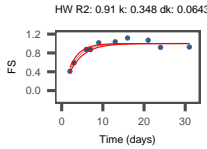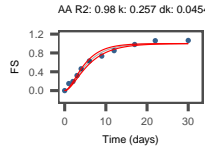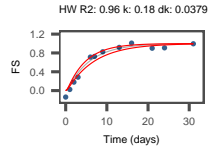

1433E – YDEMVESMK\_2

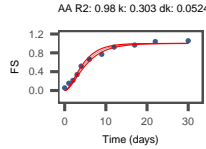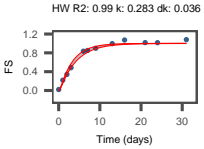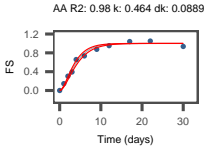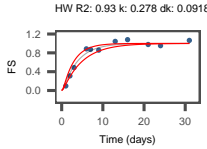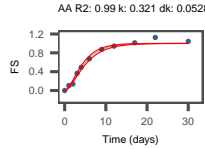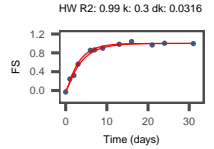

1433G – AYSEAHEISK\_2

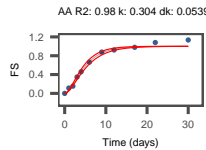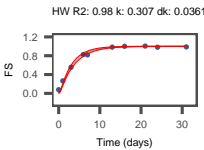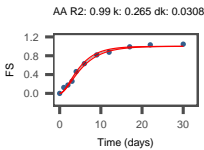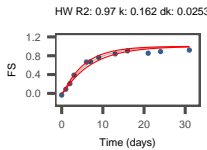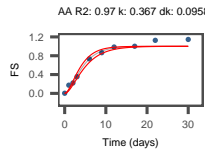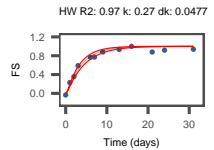

1433G – AYSEAHEISK\_3

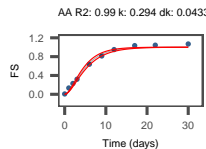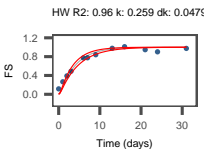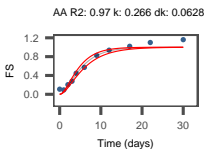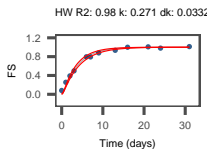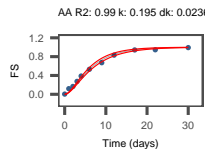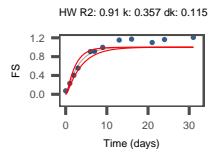

1433G – TAFDDAIAELDTLNEESYK\_2

1433Z – TAFDEAIAELDTLSEESYK\_2

1433Z – TAFDEAIAELDTLSEESYK\_3

1433S(Non-Unique) – NLLSVAYK\_2

2AAA – DNTIEHLLPLFLAQLK\_3

1433T – YDDMATCMK\_2

2AAA – SALASVIMGLSPILGK\_2

1433Z – FLIPNASQPESK\_2

3HAA – YYVGDTEDLVFEK\_2

3HIDH – EAGEQVASSPAEVAEK\_2

AA R2: 0.94 k: 0.153 dk: 0.0466

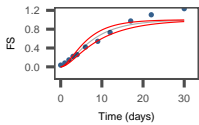

HW R2: 0.98 k: 0.136 dk: 0.0171

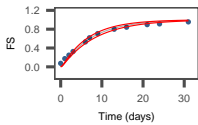

6PGL – VTLTLPVLNAAQSIIFVATGEGK\_3

AA R2: 0.98 k: 0.2 dk: 0.0383

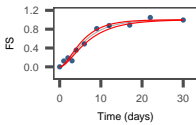

HW R2: 0.99 k: 0.193 dk: 0.0152

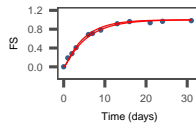

AAAD – WFLQEDVLEK\_2

AA R2: 0.98 k: 0.442 dk: 0.0877

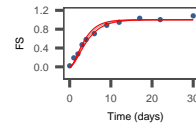

HW R2: 0.93 k: 0.51 dk: 0.145

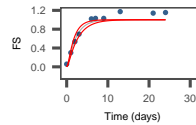

3HIDH – HGYPILYDVFPDVCK\_3

AA R2: 0.98 k: 0.174 dk: 0.0248

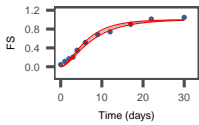

HW R2: 0.99 k: 0.122 dk: 0.00937

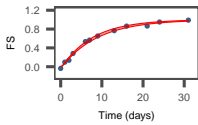

A1AT1(Non-Unique) – LDQDTVFALANYLFK\_2

AA R2: 0.92 k: 1.51 dk: 0.937

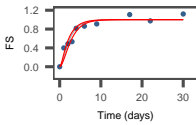

HW R2: 0.94 k: 1.02 dk: 0.232

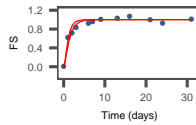

AADAT – ALQSPSYGIPPELLSWLK\_2

AA R2: 0.97 k: 0.132 dk: 0.0259

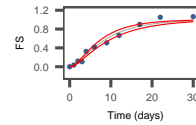

HW R2: 0.95 k: 0.0723 dk: 0.0138

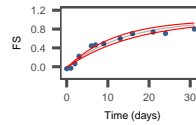

3HIDH – IITMLPSSMNAVEVYSGANGILK\_2

AA R2: 0.93 k: 0.0921 dk: 0.0275

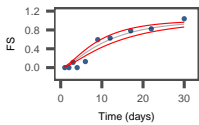

HW R2: 0.95 k: 0.108 dk: 0.0243

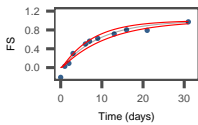

A1AT1(Non-Unique) – NHYQAEVFSVNFAESEEAk\_3

AA R2: 0.92 k: 1.12 dk: 0.696

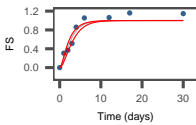

HW R2: 0.9 k: 2.63 dk: 0.954

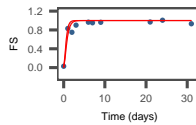

AAKG1 – GIVSLSDILQALVLTGGEK\_2

AA R2: 0.95 k: 0.148 dk: 0.0388

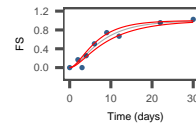

HW R2: 0.97 k: 0.268 dk: 0.0494

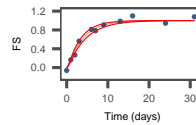

6PGD – NPQLQNLDDFFK\_2

AA R2: 0.96 k: 0.324 dk: 0.0699

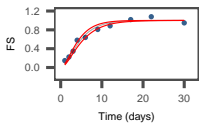

HW R2: 0.99 k: 0.152 dk: 0.0174

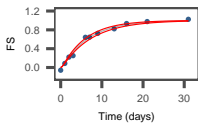

AAAD – DDGLMYVK\_2

AA R2: 0.97 k: 0.257 dk: 0.0467

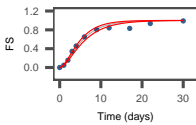

HW R2: 0.91 k: 0.436 dk: 0.152

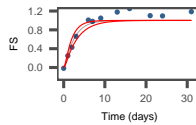

AASS – AEGIVNTQSTIK\_2

AA R2: 0.99 k: 0.155 dk: 0.0178

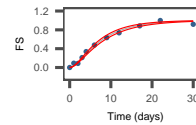

HW R2: 0.97 k: 0.126 dk: 0.0199

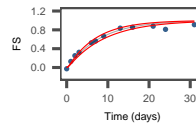

6PGL – IVAPISDPKPPQR\_3

AA R2: 0.99 k: 0.19 dk: 0.0249

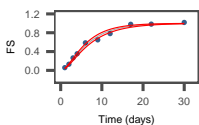

HW R2: 0.98 k: 0.148 dk: 0.02

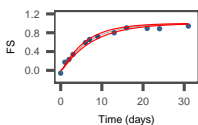

AAAD – NPTPGSSELAQK\_2

AA R2: 0.98 k: 0.421 dk: 0.0744

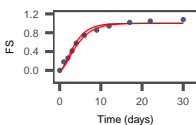

HW R2: 0.91 k: 0.418 dk: 0.0938

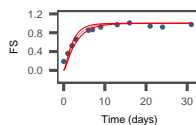

AASS – LQSLVESQDLVISLLPYVHPVAK\_3

AA R2: 0.96 k: 0.289 dk: 0.0812

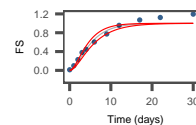

HW R2: 0.98 k: 0.181 dk: 0.0256

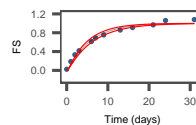

6PGL – VTLTLPVLNAAQSIIFVATGEGK\_2

AA R2: 0.96 k: 0.117 dk: 0.024

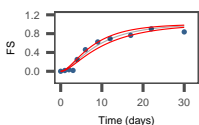

HW R2: 0.99 k: 0.23 dk: 0.0264

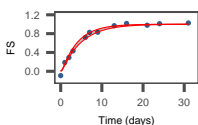

AAAD – VVVWETAfVK\_2

AA R2: 0.99 k: 0.362 dk: 0.0546

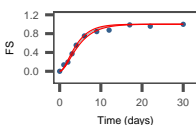

HW R2: 0.94 k: 0.304 dk: 0.0948

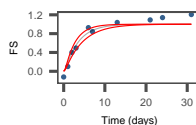

AATC – FLFPFDSAYQGFASGDLEK\_2

AA R2: 0.98 k: 0.203 dk: 0.0357

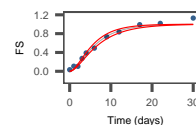

HW R2: 0.97 k: 0.144 dk: 0.0251

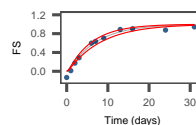

AATC – FLFFPFDAYSQGFASGDLEK\_3

AA R2: 0.97 k: 0.223 dk: 0.0496

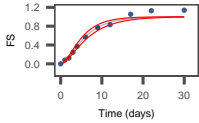

HW R2: 0.95 k: 0.223 dk: 0.0446

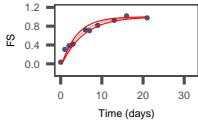

ABCD3 – EGGWDSVQDWMVDVLSGGEK\_2

AA R2: 0.97 k: 0.442 dk: 0.117

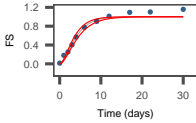

HW R2: 0.99 k: 0.353 dk: 0.034

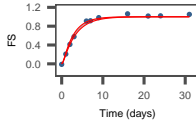

ACAD8 – FASYCLTEPGSGSDAASLTSK\_2

AA R2: 0.98 k: 0.156 dk: 0.028

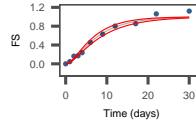

HW R2: 0.95 k: 0.136 dk: 0.0346

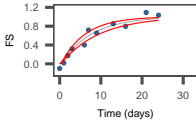

AATM – EYLPGLGAEFK\_2

AA R2: 0.95 k: 0.186 dk: 0.0473

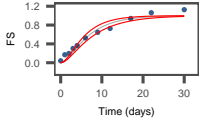

HW R2: 0.99 k: 0.153 dk: 0.0136

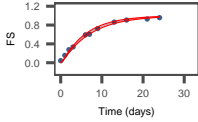

ABCD3 – LITNSEEIAFYNGNK\_2

AA R2: 0.97 k: 0.483 dk: 0.119

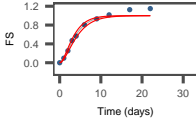

HW R2: 0.96 k: 0.232 dk: 0.0515

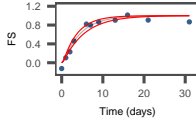

ACADL – AFVDSCLQLHETK\_3

AA R2: 0.98 k: 0.127 dk: 0.0174

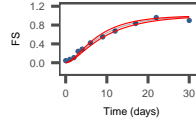

HW R2: 0.97 k: 0.194 dk: 0.0285

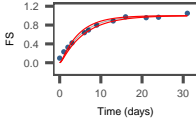

AATM – NLFAFFDMAYQGFASGDGDK\_2

AA R2: 0.92 k: 0.0986 dk: 0.0345

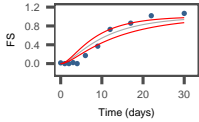

HW R2: 0.99 k: 0.127 dk: 0.01

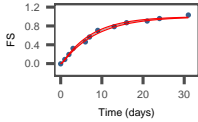

ABCD3 – YLYEEYLQAFYYK\_2

AA R2: 0.97 k: 0.471 dk: 0.114

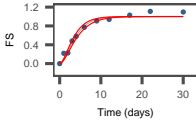

HW R2: 0.95 k: 0.267 dk: 0.0724

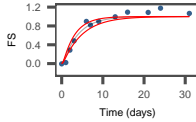

ACADL – FFQEEVIPHTWEK\_3

AA R2: 0.95 k: 0.12 dk: 0.0301

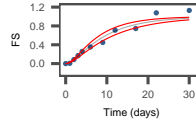

HW R2: 0.92 k: 0.194 dk: 0.0471

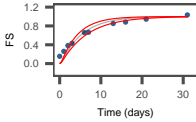

AATM – NLFAFFDMAYQGFASGDGDK\_3

AA R2: 0.97 k: 0.148 dk: 0.0308

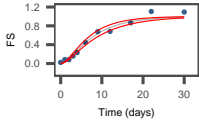

HW R2: 0.96 k: 0.135 dk: 0.0301

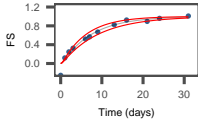

ABHEB – INAVDYASVK\_2

AA R2: 0.99 k: 0.212 dk: 0.0253

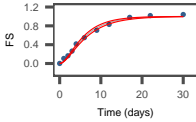

HW R2: 0.99 k: 0.18 dk: 0.0162

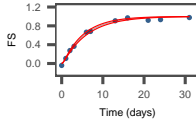

ACADL – QGLLGINIAEK\_2

AA R2: 0.99 k: 0.137 dk: 0.0142

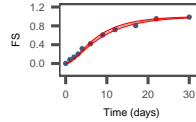

HW R2: 0.98 k: 0.19 dk: 0.0284

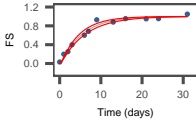

AATM – SSWWTHVEMGPPDILGVTEAFK\_3

AA R2: 0.94 k: 0.215 dk: 0.0577

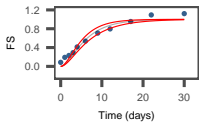

HW R2: 0.99 k: 0.105 dk: 0.0108

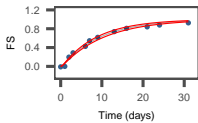

ABHEB – TPALIVYGDQDPMGSSSFQHLK\_3

AA R2: 0.96 k: 0.261 dk: 0.0689

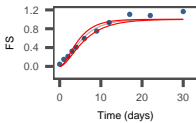

HW R2: 0.99 k: 0.192 dk: 0.0141

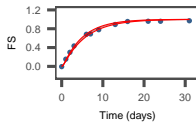

ACADL – TVAHIQTVQHK\_2

AA R2: 0.98 k: 0.145 dk: 0.019

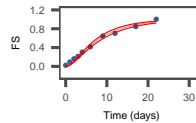

HW R2: 0.99 k: 0.118 dk: 0.00946

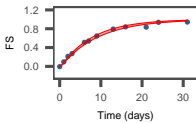

AATM – TCGDFSGALEDISK\_2

AA R2: 0.98 k: 0.133 dk: 0.0205

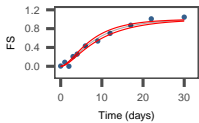

HW R2: 0.99 k: 0.138 dk: 0.0101

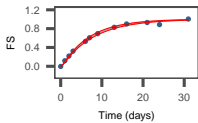

ACACA – LLLLEDLVK\_2

AA R2: 0.9 k: 0.233 dk: 0.0876

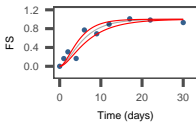

HW R2: 0.91 k: 0.448 dk: 0.173

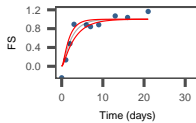

ACADL – TVAHIQTVQHK\_3

AA R2: 0.97 k: 0.22 dk: 0.0531

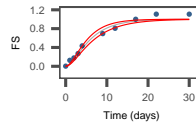

HW R2: 0.99 k: 0.127 dk: 0.0126

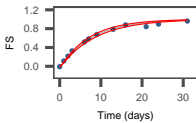

ACADM - AFTGFIVEADTPGIHGK\_3

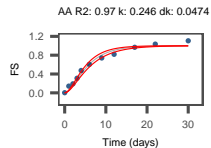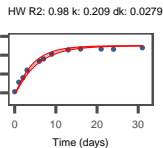

ACADV - EATQAVLDKPKTESSDASTR\_2

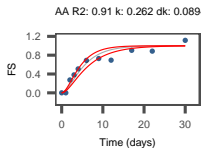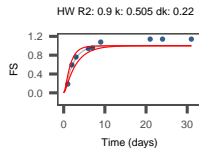

ACD11 - SGQSNPTFFLQK\_2

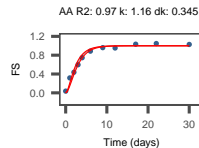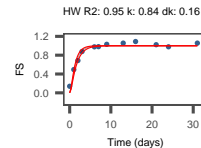

ACADM - ENVLIGEGAGFK\_2

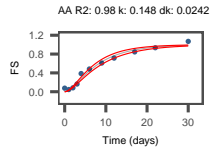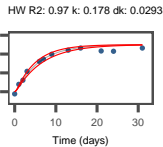

ACADV - SFAVGMFK\_2

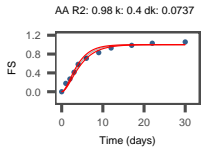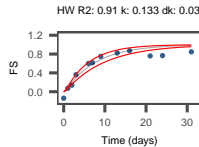

ACDSB - VPETNILGK\_2

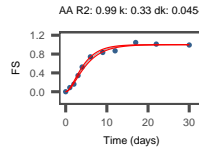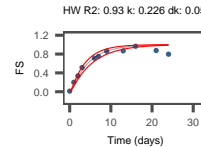

ACADM - QEPGLGFSELTEQQK\_2

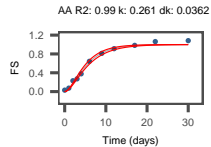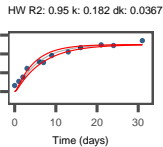

ACADV - SLSEGYPTAQHEK\_3

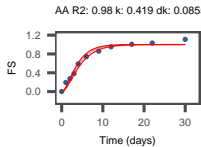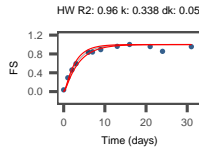

ACLY - EILIPVFK\_2

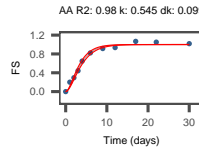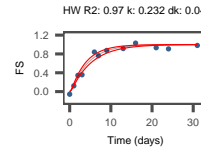

ACADM - SGEYPPFLIK\_2

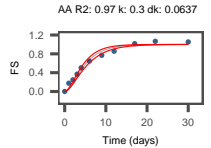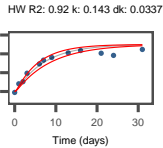

ACBP - QATVGDVNTDRPGLDLK\_2

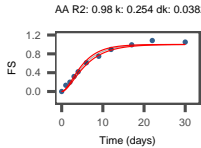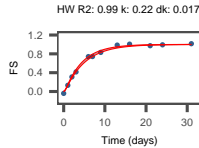

ACLY - LGLVGNLSLDGVK\_2

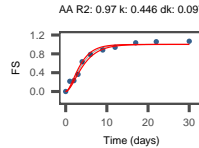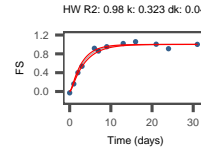

ACADS - EHLFPTAQVK\_2

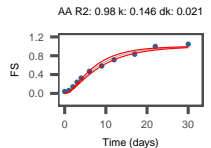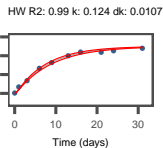

ACBP - TQPTDEEMLFIYSHFK\_2

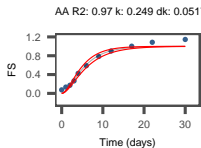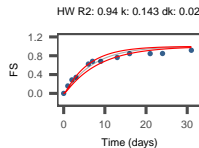

ACOC - DFESCLGAK\_2

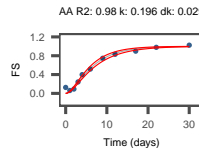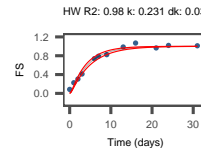

ACADS - IGIASQALGIAQSLDCAVK\_3

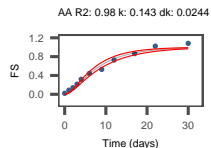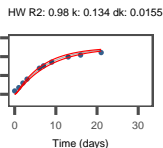

ACBP - TQPTDEEMLFIYSHFK\_3

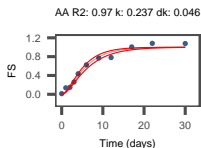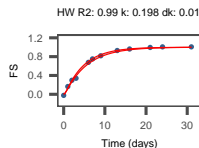

ACOC - GPFLGK\_2

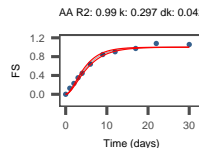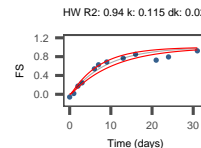



ACOX1 – TEVHESYK\_2

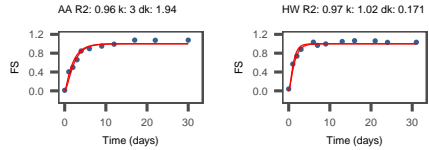

ACSA – IGPATPDYIQNAPGLPK\_2

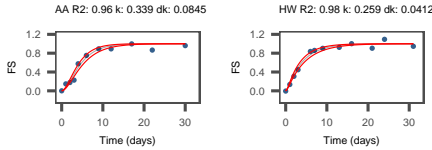

ACSF2 – TQYYDILK\_2

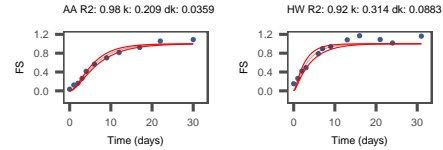

ACOX1 – TEVHESYK\_3

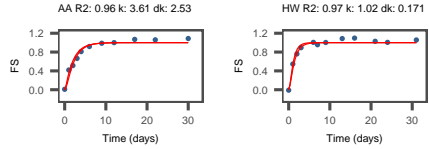

ACSF2 – FLSCYPDINIQTSGTTGNPK\_2

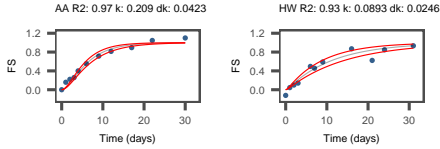

ACSL1(Non-Unique) – DGLWHTGDIGK\_3

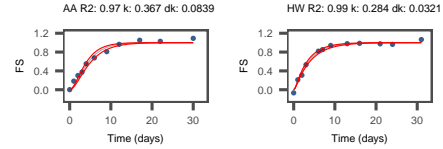

ACOX1 – TQEFILNSPTVTSIK\_2

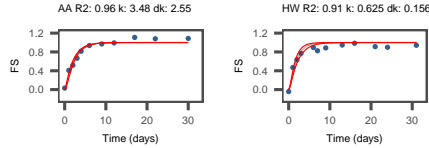

ACSF2 – HPQVQEAQVGVK\_2

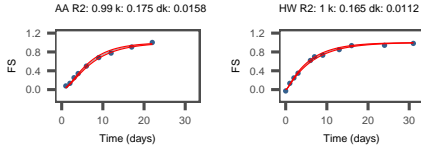

ACSL1 – EVAELAEICGSLIQK\_3

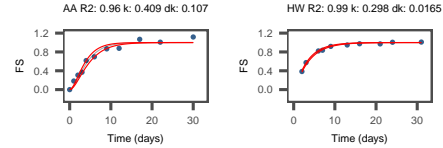

ACOX1 – YDGNVYENLEWAK\_2

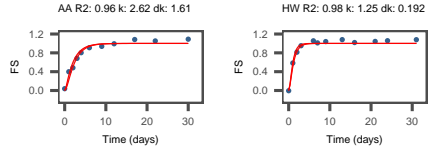

ACSF2 – HPQVQEAQVGVK\_3

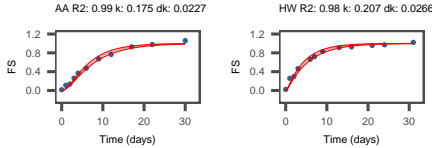

ACSL1(Non-Unique) – LAQGEYIAPEK\_2

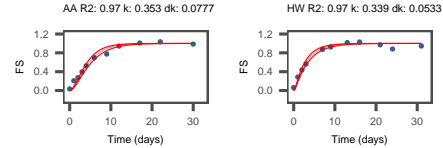

ACPM – SDAPPLTLDGK\_2

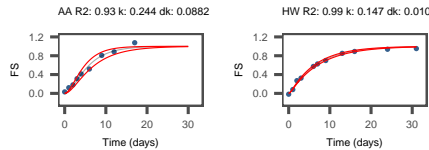

ACSF2 – HPQVQEAQVGVKDER\_3

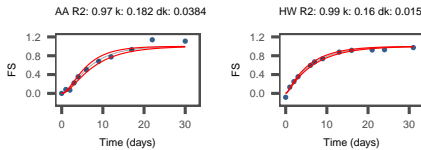

ACSL1 – LIAVVPDVESLPSWAQK\_2

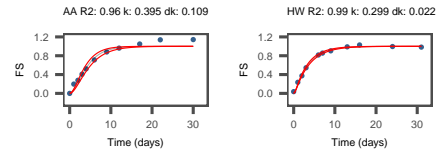

ACSA – AELGMNDSPSQSPPVK\_2

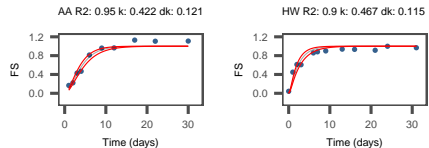

ACSF2 – LPDLTTIVSDAPLPGTLLEDVIAAGGK\_3

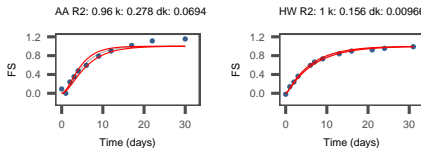

ACSL1 – SAVLEDDKLLVYDDVDR\_3

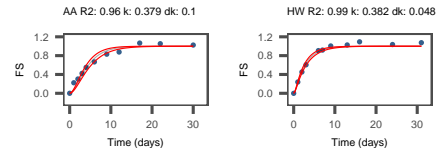

ACSL1 – WLLDFASK\_2

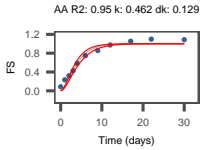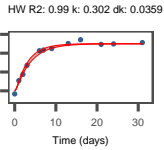

ACSM1 – AIVTASLVPEVESVASECPDLK\_2

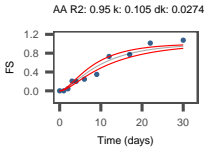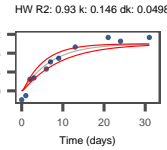

ACTB(Non-Unique) – EITALAPSTMK\_2

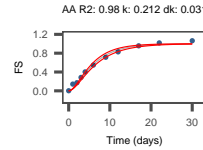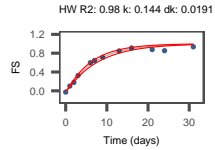

ACSL5 – ADIPVICDTPOK\_2

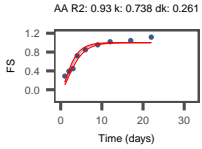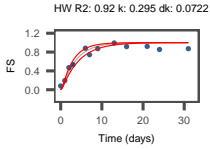

ACSM1 – VIVEVLFK\_2

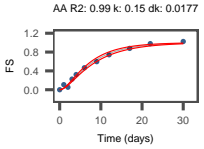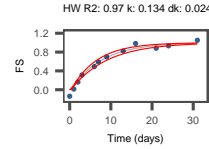

ACTB(Non-Unique) – HQGVM[15.9949]VGMGQK\_2

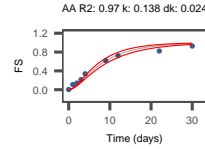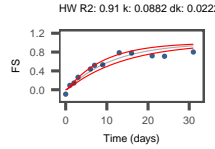

ACSL5 – CGVEMLSLHDAENIGK\_3

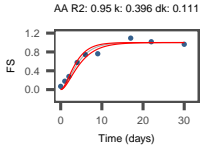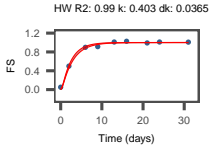

ACSS3 – KVEYIPLLEALR\_3

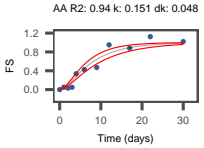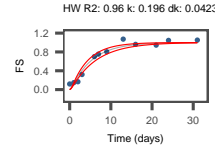

ACTB(Non-Unique) – HQGVMVGMGQK\_2

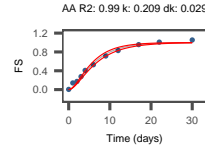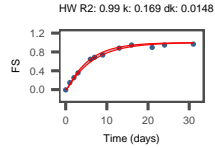

ACSL5 – SFLIGVVPPDPSLPSFAAK\_2

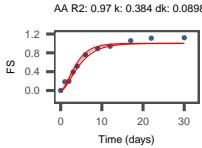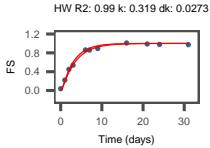

ACTA(Non-Unique) – YPIEHGITNWDDEK\_2

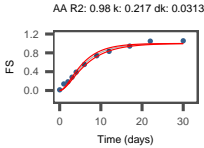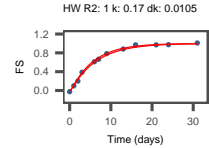

ACTB(Non-Unique) – HQGVMVGMGQK\_3

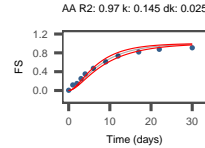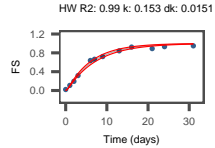

ACSM1 – AFIVLNPEFLSHDQEQLIK\_3

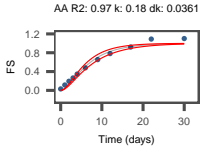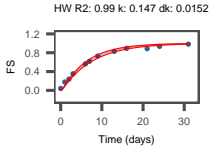

ACTA(Non-Unique) – YPIEHGITNWDDEK\_3

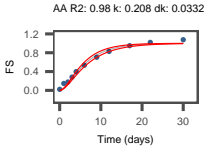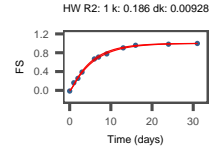

ACTB(Non-Unique) – KDLYANTVLSGGTTMYPGIADR\_2

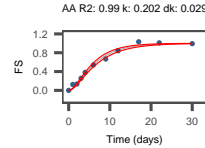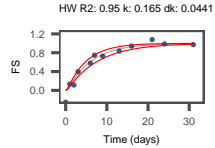

ACSM1 – AILPFDLQIHEK\_2

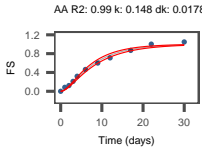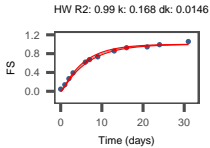

ACTB(Non-Unique) – DSYVGDEAQSK\_2

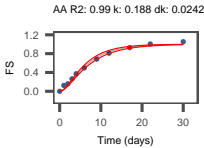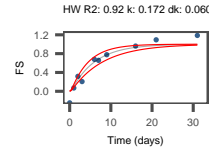

ACTB(Non-Unique) – KDLYANTVLSGGTTMYPGIADR\_3

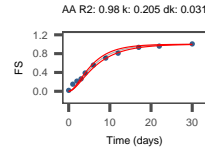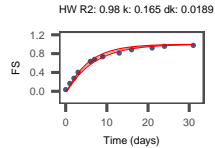

## ACTB(Non-Unique) – VAPEEHPVLLTEAPLNPK\_2

AA R2: 0.99 k: 0.205 dk: 0.0295

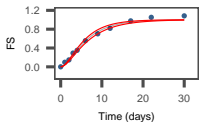

HW R2: 0.97 k: 0.162 dk: 0.018

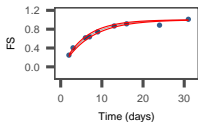

## ACY3 – LFLYEPAGTETFSVESISK\_2

AA R2: 0.95 k: 0.305 dk: 0.0838

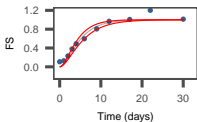

HW R2: 0.91 k: 0.163 dk: 0.0493

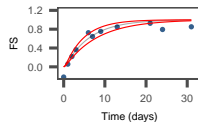

## ADH1 – ISTSFQSQYTVDDIAVK\_2

AA R2: 0.99 k: 0.23 dk: 0.0289

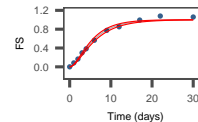

HW R2: 0.95 k: 0.218 dk: 0.0442

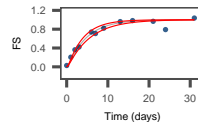

## ACTB(Non-Unique) – VAPEEHPVLLTEAPLNPK\_3

AA R2: 0.98 k: 0.206 dk: 0.0342

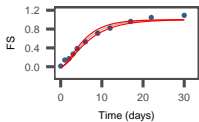

HW R2: 0.98 k: 0.181 dk: 0.0249

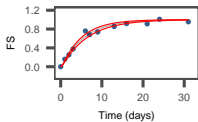

## ADH1 – AAVLWELHKPF\_2

AA R2: 0.93 k: 0.329 dk: 0.0998

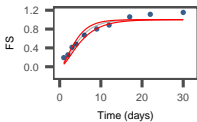

HW R2: 0.94 k: 0.192 dk: 0.0391

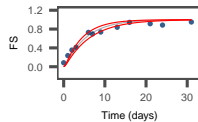

## ADH1 – KFPLDLPLTHVLPF\_3

AA R2: 0.99 k: 0.248 dk: 0.0347

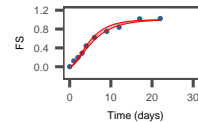

HW R2: 0.97 k: 0.13 dk: 0.0197

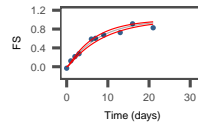

## ACTN1 – LAILGIHNEVSK\_3

AA R2: 0.94 k: 0.129 dk: 0.0323

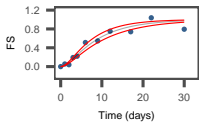

HW R2: 0.97 k: 0.118 dk: 0.0175

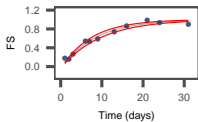

## ADH1 – ELGATECINPDQYSK\_2

AA R2: 0.98 k: 0.228 dk: 0.0406

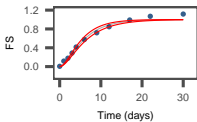

HW R2: 1 k: 0.198 dk: 0.013

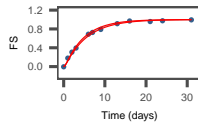

## ADH1 – LVADFMAK\_2

AA R2: 0.99 k: 0.238 dk: 0.0339

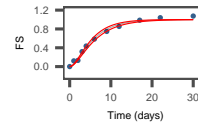

HW R2: 0.99 k: 0.184 dk: 0.0168

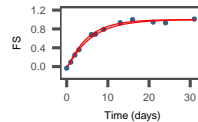

## ACTN1 – LLETIDQLVLEYAK\_2

AA R2: 0.91 k: 0.137 dk: 0.0516

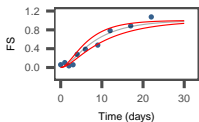

HW R2: 0.96 k: 0.14 dk: 0.0272

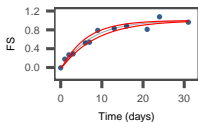

## ADH1 – FPLDLPLTHVLPFEK\_3

AA R2: 0.98 k: 0.244 dk: 0.0368

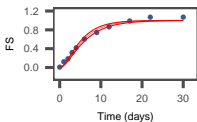

HW R2: 0.99 k: 0.144 dk: 0.0165

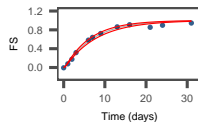

## ADH1 – QIHFISTSTFSQYTVDDIAVK\_2

AA R2: 0.91 k: 0.276 dk: 0.105

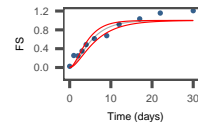

HW R2: 1 k: 0.195 dk: 0.0135

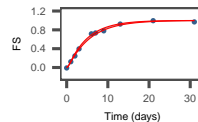

## ACTN4 – MAPYQGPDAAAPGALDYK\_2

AA R2: 0.98 k: 0.255 dk: 0.0468

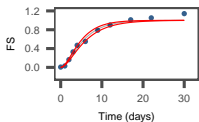

HW R2: 0.92 k: 0.306 dk: 0.0719

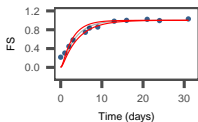

## ADH1 – GAIFGGFK\_2

AA R2: 0.98 k: 0.256 dk: 0.0396

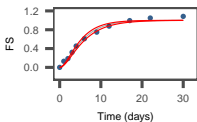

HW R2: 0.96 k: 0.153 dk: 0.0267

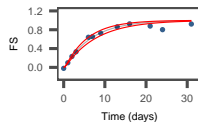

## ADH1 – SKPIQEVLEQMETDGGVDFSFEVIGR\_3

AA R2: 0.91 k: 0.257 dk: 0.098

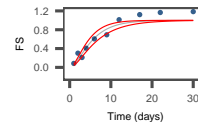

HW R2: 0.99 k: 0.184 dk: 0.0172

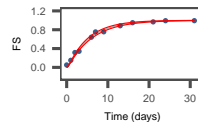

## ACY1 – MTPTDSDPWWAAFSGACK\_2

AA R2: 0.95 k: 0.107 dk: 0.0295

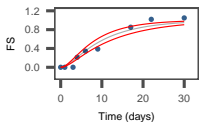

HW R2: 0.92 k: 0.246 dk: 0.0939

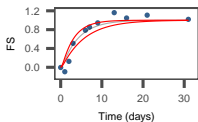

## ADH1 – IIAVDINK\_2

AA R2: 0.99 k: 0.24 dk: 0.0323

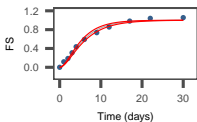

HW R2: 0.99 k: 0.21 dk: 0.0205

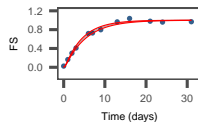

## ADH1 – TIEDIEVAPPK\_2

AA R2: 0.99 k: 0.196 dk: 0.0244

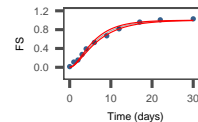

HW R2: 0.98 k: 0.197 dk: 0.0255

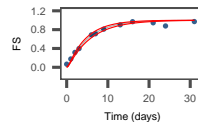



ADH1 – TVVDIAVAK\_2

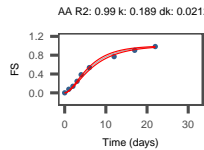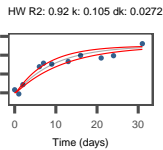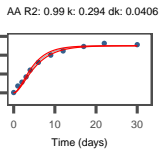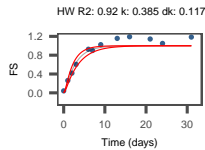

ADK – VEYHAGGSTQNSMK\_2

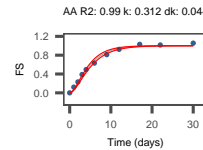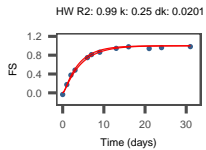

ADH1 – VTPGSTCAVFLGGVGLSVIIGCK\_3

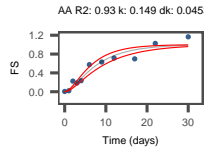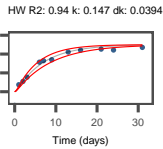

ADK – LSQLVSDKPLTECIR\_3

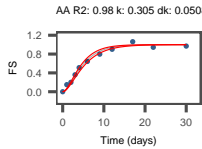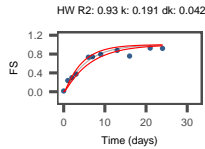

ADT1(Non-Unique) – LLLQVQHASK\_2

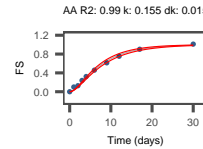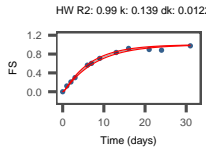

ADHX – EFGASECIPQDFSK\_2

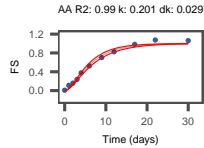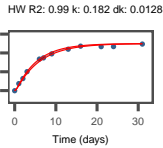

ADK – SLVANLAAANCYK\_2

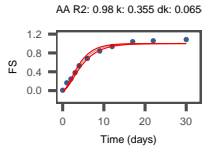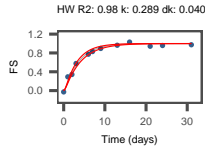

AGT2 – LGSFWFGQTHDVLDPDVTMAK\_3

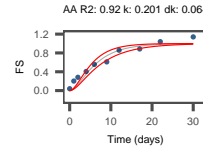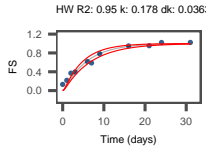

ADHX – VCLLGGISTGYGAAVNTAK\_2

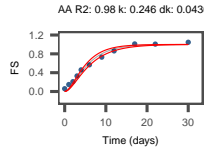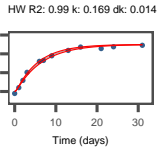

ADK – TGCTFPEKPDFH\_3

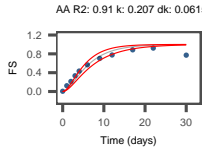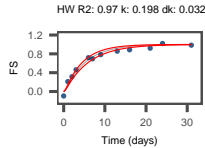

AGT2 – LGSFWFGQTHDVLDPDVTMAK\_4

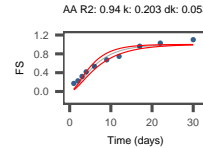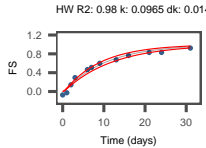

ADHX – YIPQCGECK\_2

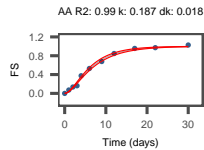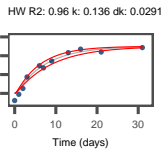

ADK – VAQWLQEPHK\_2

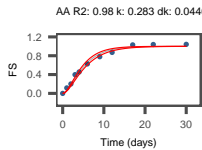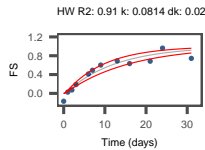

AIFM1 – ELWFSDDPNVK\_2

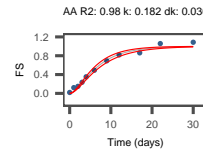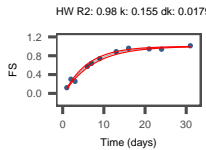

ADK – AATFFGCIGDK\_2

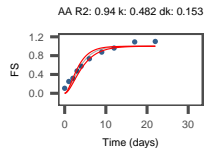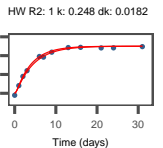

ADK – VAQWLQEPHK\_3

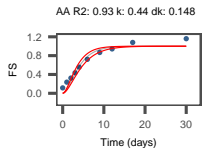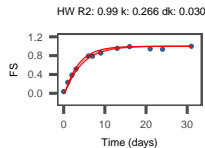

AIMP2 – VLSTVHTHSSVK\_2

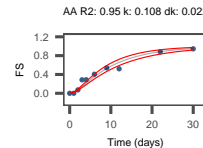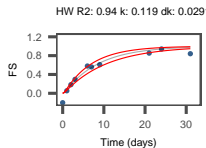

AK1A1 – ALEVLVAK\_2

AK1CD – SGNDNDFVNEQ GK\_2

AL1A1 – IFINNEWHNSVSGK\_2

AA R2: 0.99 k: 0.207 dk: 0.0281

HW R2: 0.98 k: 0.184 dk: 0.0258

AA R2: 0.99 k: 0.175 dk: 0.0206

HW R2: 0.98 k: 0.146 dk: 0.0193

AA R2: 0.91 k: 0.209 dk: 0.0846

HW R2: 0.92 k: 0.124 dk: 0.0312

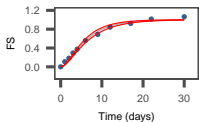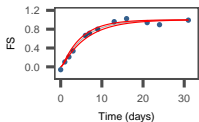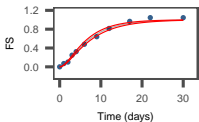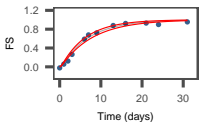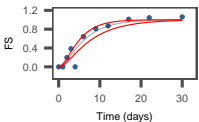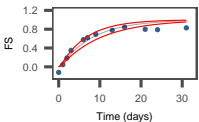

AK1A1 – HIDCASVYGNETEIGEALK\_2

AK1CD – YKPCVNQVECHLYNQR\_3

AL1A1 – PAEQTPLTLHLASLIK\_2

AA R2: 0.97 k: 0.26 dk: 0.0609

HW R2: 0.99 k: 0.188 dk: 0.0224

AA R2: 0.96 k: 0.262 dk: 0.0652

HW R2: 0.99 k: 0.168 dk: 0.0168

AA R2: 0.99 k: 0.283 dk: 0.0397

HW R2: 0.96 k: 0.138 dk: 0.0316

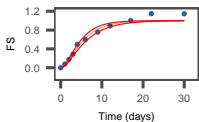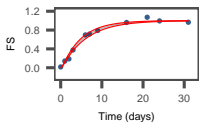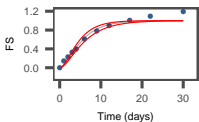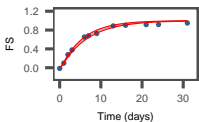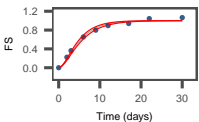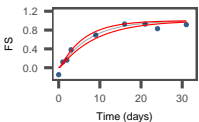

AK1A1 – ILQNIQVDFDFFSPEEMK\_2

AK1CD – YKPCVNQVECHLYNQR\_4

AL1A1 – PAEQTPLTLHLASLIK\_3

AA R2: 0.97 k: 0.191 dk: 0.0412

HW R2: 0.98 k: 0.17 dk: 0.0229

AA R2: 0.95 k: 0.294 dk: 0.0856

HW R2: 0.96 k: 0.273 dk: 0.0505

AA R2: 0.98 k: 0.317 dk: 0.0674

HW R2: 0.99 k: 0.222 dk: 0.0215

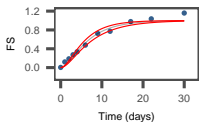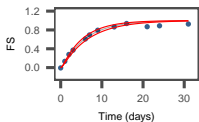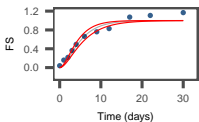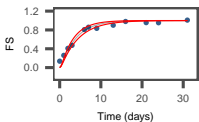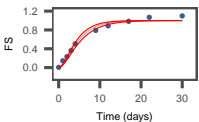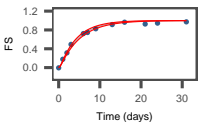

AK1A1 – YIVPMITVDGK\_2

AK1D1 – LDYIDLIIELPMAFK\_2

AL1A1 – VAFTGSTQV GK\_2

AA R2: 0.97 k: 0.239 dk: 0.046

HW R2: 0.98 k: 0.204 dk: 0.0277

AA R2: 0.98 k: 0.172 dk: 0.0252

HW R2: 0.96 k: 0.167 dk: 0.0403

AA R2: 0.97 k: 0.295 dk: 0.0616

HW R2: 0.99 k: 0.218 dk: 0.0192

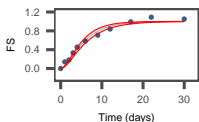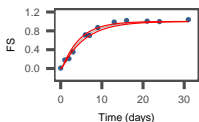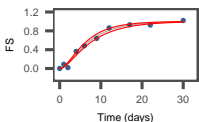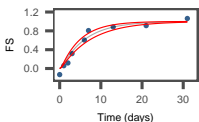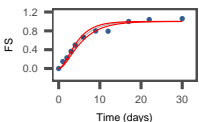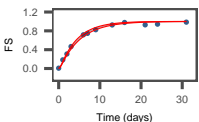

AK1CD – ENLQVFGFLSPEDMK\_2

AK1D1 – TNLCAWTEALEACK\_2

AL1A1 – VFANAYLSDLGGCIK\_3

AA R2: 0.92 k: 0.132 dk: 0.0451

HW R2: 0.99 k: 0.174 dk: 0.0131

AA R2: 0.98 k: 0.193 dk: 0.0333

HW R2: 0.98 k: 0.188 dk: 0.0323

AA R2: 0.98 k: 0.303 dk: 0.0502

HW R2: 0.97 k: 0.209 dk: 0.0309

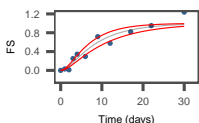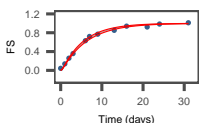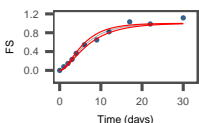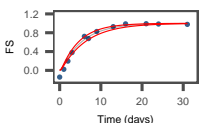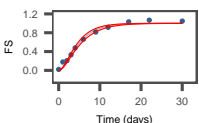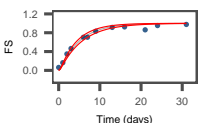

AK1CD – GIVPLAQSK\_2

AL1A1 – EAGPPGVVNVIPGYGTAGAIISSHMDVK\_3

AL1A1 – YCAGWADK\_2

AA R2: 0.94 k: 0.377 dk: 0.127

HW R2: 0.99 k: 0.183 dk: 0.0177

AA R2: 0.93 k: 0.372 dk: 0.134

HW R2: 0.9 k: 0.374 dk: 0.0975

AA R2: 0.99 k: 0.307 dk: 0.0462

HW R2: 0.93 k: 0.276 dk: 0.0741

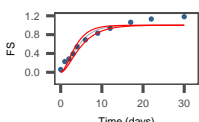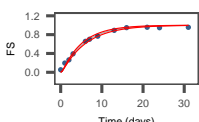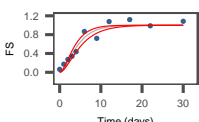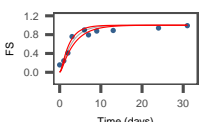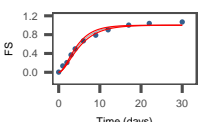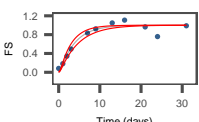

AL1A7(Non-Unique) – EEIFGPVQQIMK\_2

AL1A7 – TVAMQISQK\_2

AL1L1 – FAELTLK\_2

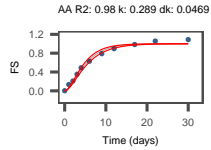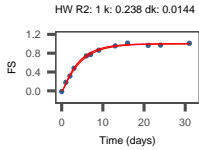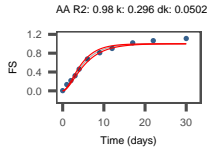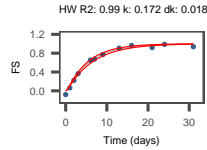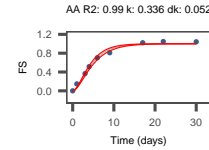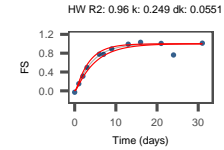

AL1A7(Non-Unique) – ELGEGHLYEYTELK\_2

AL1A7(Non-Unique) – VTLELGGK\_2

AL1L1 – GASAINWTLIHGDK\_3

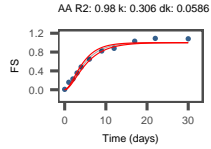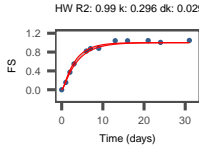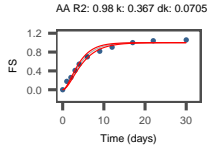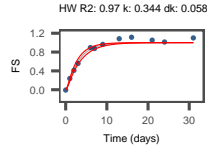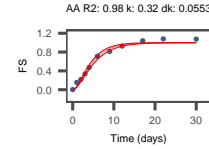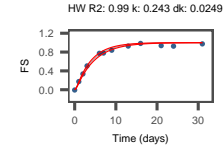

AL1A7 – IFINNEHWSVSSK\_2

AL1B1 – KIEEVIQR\_2

AL1L1 – GQALPEVVAK\_2

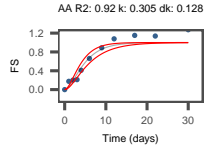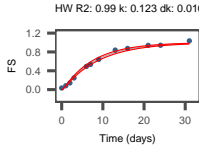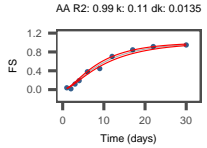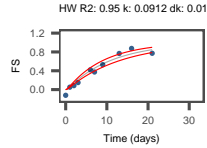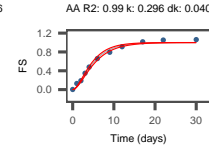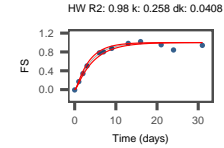

AL1A7 – ILGLIESGK\_2

AL1B1 – LAPALATGNTVVMK\_2

AL1L1 – KLVEYQQR\_2

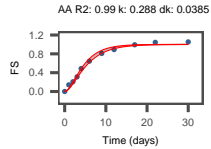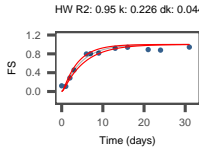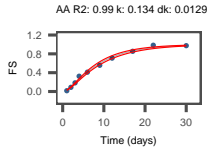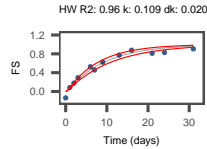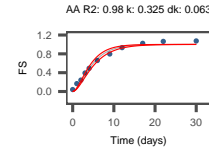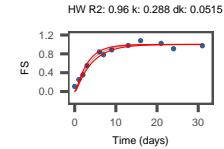

AL1A7 – LLLATMESMNAGK\_2

AL1B1 – LFINNEHDAVSK\_3

AL1L1 – LFVEDSIHQFVQK\_3

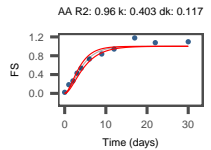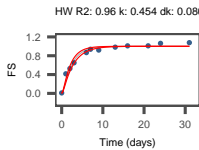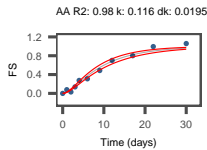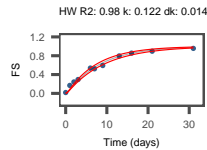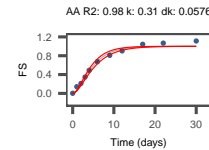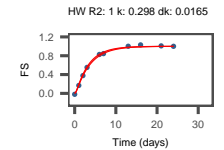

AL1A7 – PAEQPTLALHMASLIK\_3

AL1B1 – VAFTGSTEVGHLIQK\_3

AL1L1 – LQAGTVFVNTYK\_2

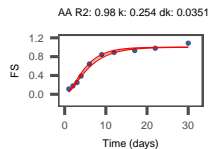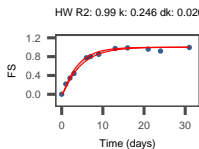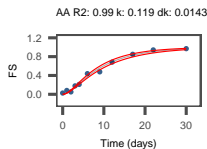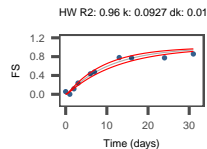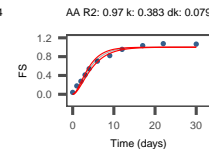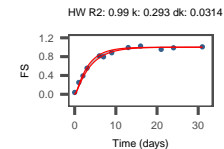

**AL1L1 – LRGEDGESECVINYVEK\_2**

**AL1L2(Non-Unique) – YFAGWC DK\_2**

**AL3A2 – YLAPTILTDVDPNSK\_2**

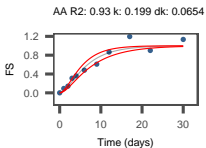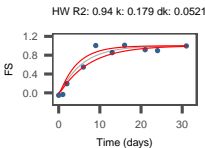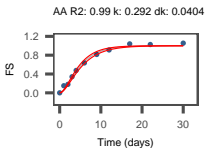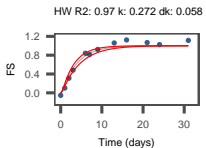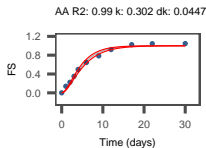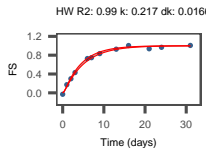

**AL1L1 – MMPASQFFK\_2**

**AL3A2 – EILAAIAADLSK\_2**

**AL4A1 – ETLQLVDSTTSYGLTGAVFAQDK\_2**

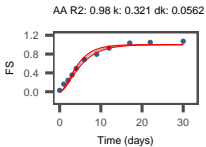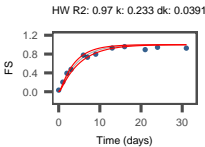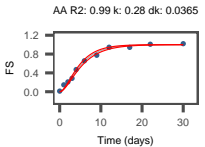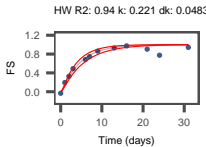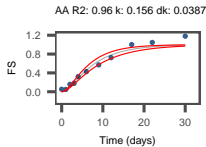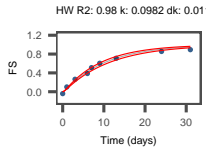

**AL1L1 – SPLIFADCNLK\_3**

**AL3A2 – SLPPFGVGASGMGAYHGK\_2**

**AL4A1 – SAFEYGGQK\_2**

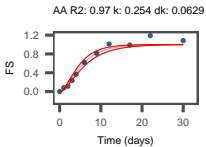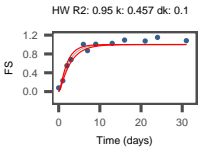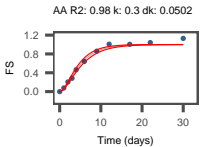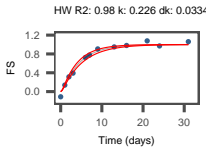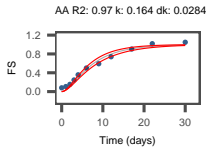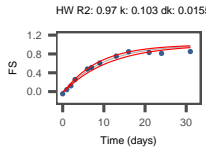

**AL1L1 – TSLGLVAQEALPIPGAHRPGLVK\_3**

**AL3A2 – SLPPFGVGASGMGAYHGK\_3**

**AL4A1 – WTSPQVIK\_2**

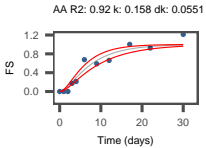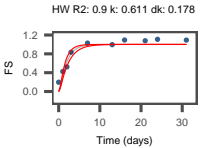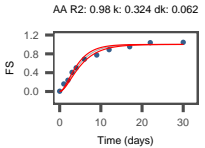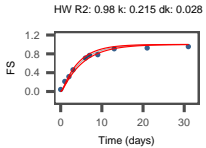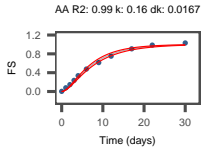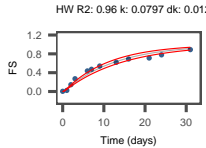

**AL1L1 – TYSTINPTDGSVICQVSLAQVSDVK\_2**

**AL3A2 – VMQEEIFGPILVSVK\_2**

**AL7A1 – FQDEEEFVFNNEVK\_2**

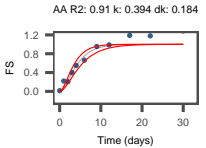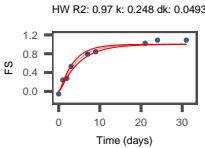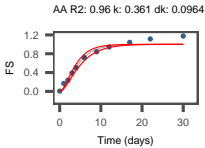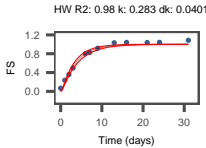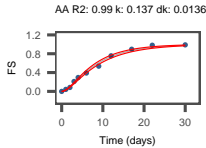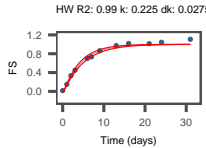

**AL1L1 – WADDGLDGTDLLLQK\_2**

**AL3A2 – VMQEEIFGPILVSVK\_3**

**AL7A1 – GAPPTSLVSVAVTK\_2**

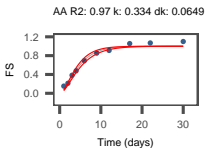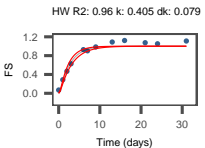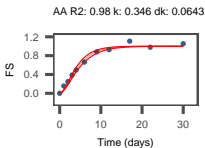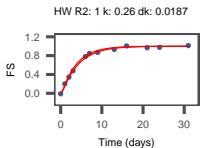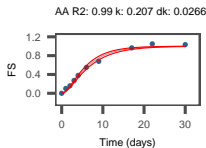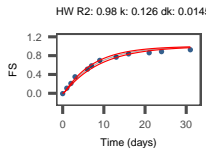

AL7A1 – GSDCGIVNVIPTSGAIEGAFGGEK\_3

AL8A1 – IAPAIAGNTVIAK\_2

ALAT1 – VLTEMPPYATQQLASFHVSVK\_3

AA R2: 0.95 k: 0.223 dk: 0.0541

HW R2: 0.94 k: 0.187 dk: 0.0317

AA R2: 0.99 k: 0.262 dk: 0.0378

HW R2: 0.98 k: 0.2 dk: 0.023

AA R2: 0.9 k: 0.667 dk: 0.386

HW R2: 0.98 k: 0.417 dk: 0.0544

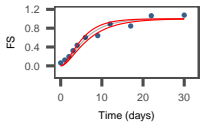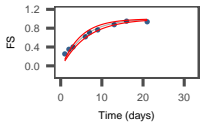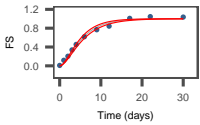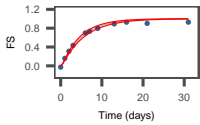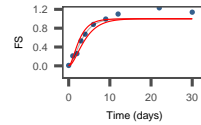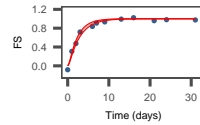

AL7A1 – QGLSSSIFTK\_2

AL8A1 – VGVPSPSANMGALISK\_2

ALAT2 – GGYMEVINLHPEIK\_3

AA R2: 0.92 k: 0.196 dk: 0.0542

HW R2: 0.94 k: 0.133 dk: 0.0268

AA R2: 0.98 k: 0.327 dk: 0.0679

HW R2: 0.98 k: 0.208 dk: 0.0241

AA R2: 0.93 k: 2.45 dk: 2.15

HW R2: 0.9 k: 0.689 dk: 0.18

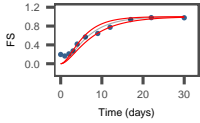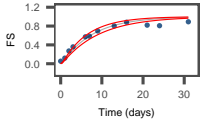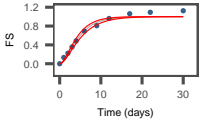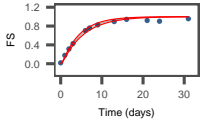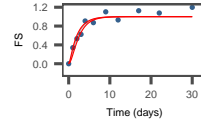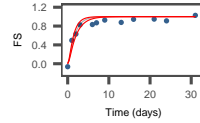

AL7A1 – VGNPWDPNLYGPLHTK\_3

AL9A1 – EPLGVCVIGAWNYPFQIACWK\_3

ALBU – AADKDTCFSTEGPNLVR\_3

AA R2: 0.98 k: 0.188 dk: 0.0265

HW R2: 0.9 k: 0.139 dk: 0.0353

AA R2: 0.96 k: 0.23 dk: 0.0607

HW R2: 0.98 k: 0.176 dk: 0.0231

AA R2: 0.95 k: 0.278 dk: 0.0708

HW R2: 0.94 k: 0.231 dk: 0.053

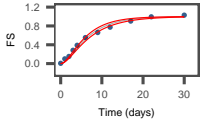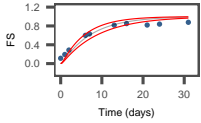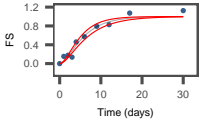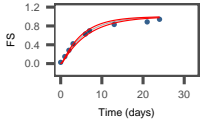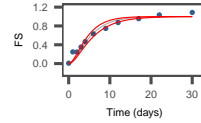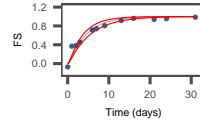

AL7A1 – VNLLSFTGSTQVGK\_2

AL9A1 – FINEVK\_2

ALBU – AETTFHSDICTLPEK\_3

AA R2: 0.99 k: 0.182 dk: 0.0244

HW R2: 0.99 k: 0.163 dk: 0.0146

AA R2: 0.92 k: 0.375 dk: 0.13

HW R2: 0.98 k: 0.15 dk: 0.0213

AA R2: 0.96 k: 0.315 dk: 0.0812

HW R2: 0.93 k: 0.269 dk: 0.0664

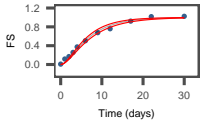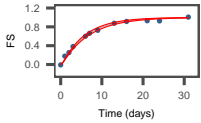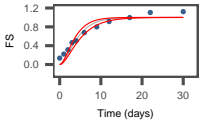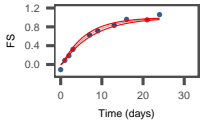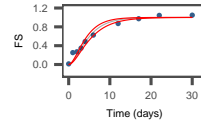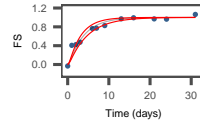

AL8A1 – ELLMLNFIGGK\_2

AL9A1 – ISFTGSVPTVGK\_2

ALBU – ENYELADCCTK\_2

AA R2: 0.99 k: 0.266 dk: 0.0322

HW R2: 0.99 k: 0.283 dk: 0.033

AA R2: 0.98 k: 0.256 dk: 0.0409

HW R2: 0.98 k: 0.11 dk: 0.0153

AA R2: 0.95 k: 0.266 dk: 0.0687

HW R2: 0.95 k: 0.286 dk: 0.0628

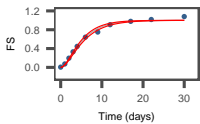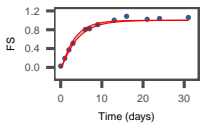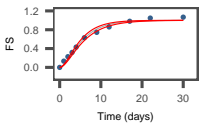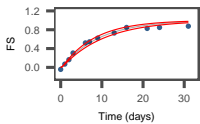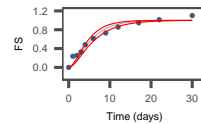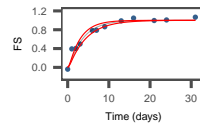

AL8A1 – FLPCNSYSDYPSTGEVYCK\_2

ALAT1 – CNPVQGAMYSFPQQLPK\_2

ALBU – GLVLIASFQYLQK\_2

AA R2: 0.95 k: 0.258 dk: 0.0853

HW R2: 0.99 k: 0.235 dk: 0.0215

AA R2: 0.92 k: 0.583 dk: 0.266

HW R2: 0.91 k: 0.451 dk: 0.104

AA R2: 0.94 k: 0.27 dk: 0.0713

HW R2: 0.96 k: 0.278 dk: 0.0517

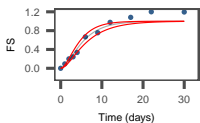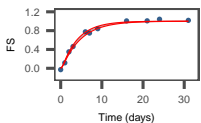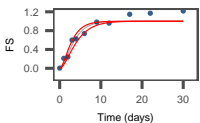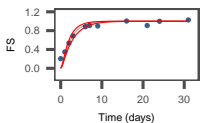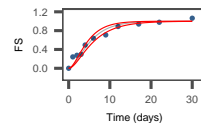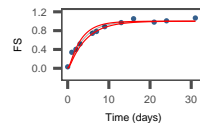

ALBU - QTALAEVVK\_2

ALBU - YMCENQATISSK\_2

ALDH2 - TYLALETLDNGKPYVYSY\_2

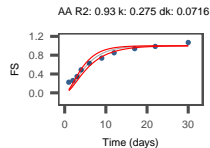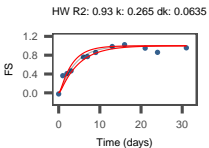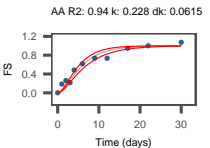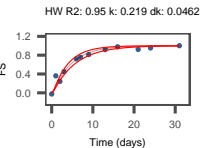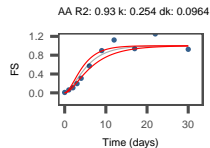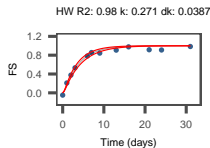

ALBU - RPCFSALTVDETYVPK\_2

ALBU\_HUMAN.sp|P07724|ALBU(Non-Unique) - NECFLQHK\_3

ALDH2 - VAEQTPLTALYVANLIK\_2

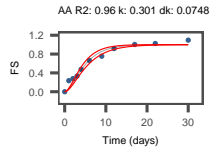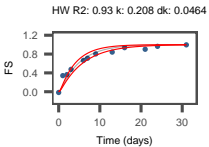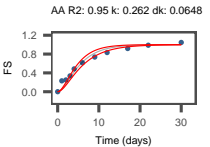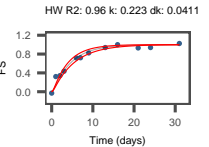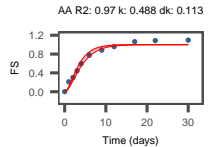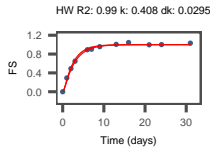

ALBU - RPCFSALTVDETYVPK\_3

ALDH2 - CYDVFGAQSFFGGYK\_2

ALDH2 - VAEQTPLTALYVANLIK\_3

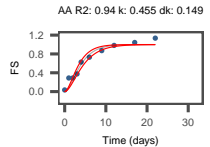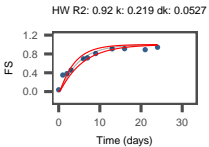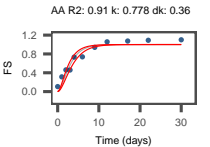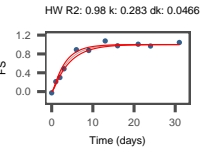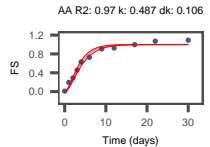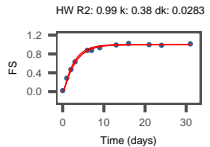

ALBU - TCVADESAANCDK\_2

ALDH2 - EEIFGPVMQILK\_2

ALDH2 - VAFTGSTEVGHLIQVAAGSSNLK\_2

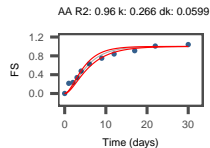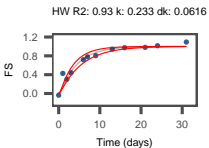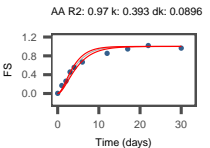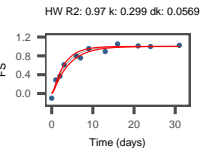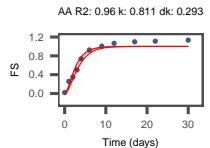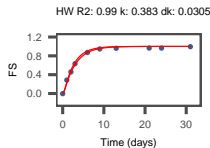

ALBU - TVMDDFAQLDTCCK\_2

ALDH2 - IIPWNFLLMQAWK\_2

ALDH2 - VAFTGSTEVGHLIQVAAGSSNLK\_3

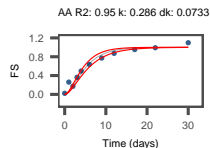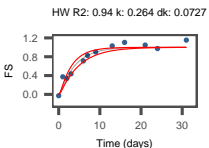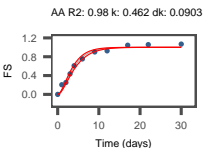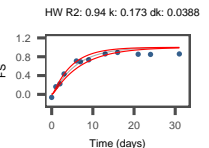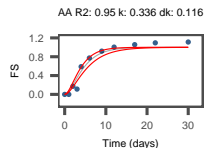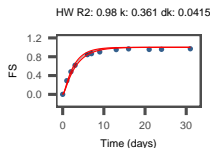

ALBU - TVMDDFAQLDTCCK\_3

ALDH2 - LGPALATGNVVMK\_2

ALDH2 - YGLAAAVFTK\_2

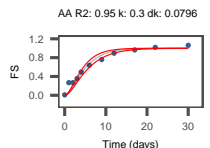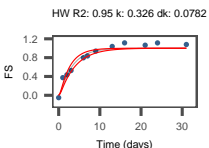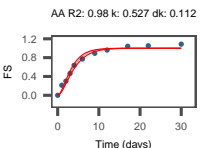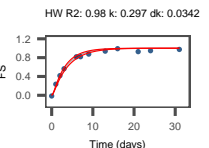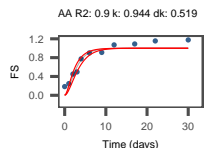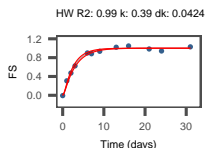

ALDH2(Non-Unique) – YYAGWADK\_2

AMPL – GLVLGIYAK\_2

AMPL – SWIEEQEMGSFLSVAK\_2

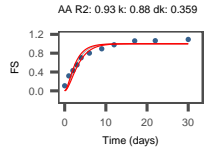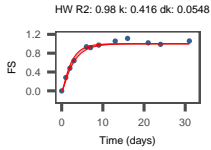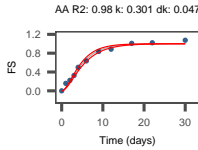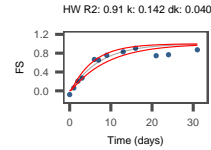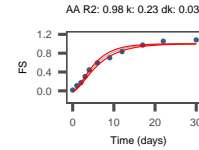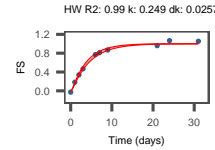

ALDOA\_RABIT,sp[P05063]ALDOC(Non-Unique) – VLAAYYK\_2

AMPL – LILADALCYAHTFNPK\_3

AMPL – SWIEEQEMGSFLSVAK\_3

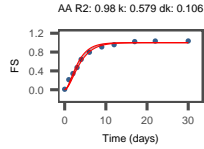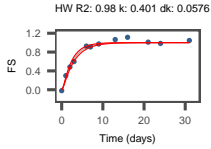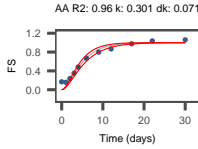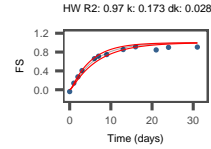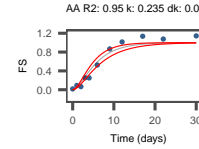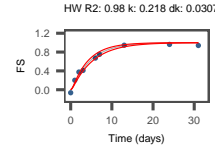

ALDOB – ALNDHHVYLEGTLTKPN\_2

AMPL – LNLPINIIGLAPLCENMPGK\_2

AMPL – TFYGLHQDFPSVVVGLGK\_2

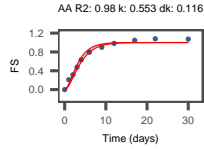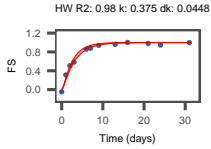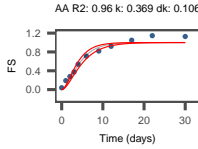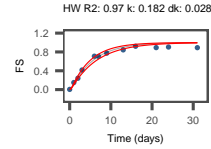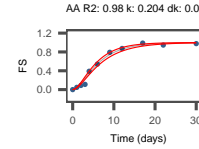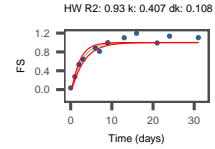

ALDOB – ALNDHHVYLEGTLTKPN\_3

AMPL – LNLPINIIGLAPLCENMPGK\_3

AMPL – WAHLDIAGVMTNK\_3

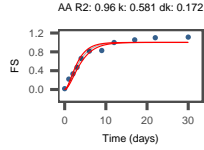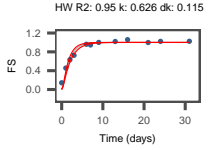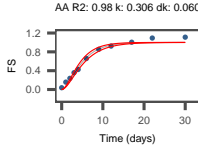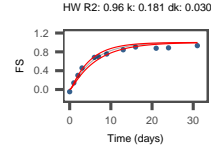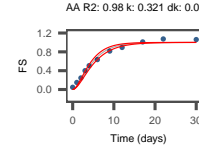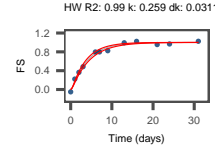

ALDOB – ALNDHHVYLEGTLTKPN\_4

AMPL – QVIDCQLADVNNLGK\_2

ANXA2 – SALSGHLETVILGLLK\_3

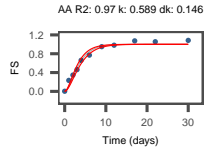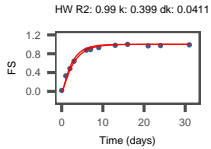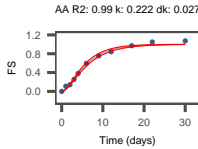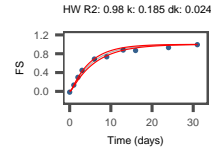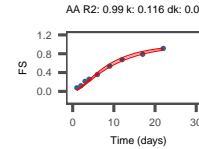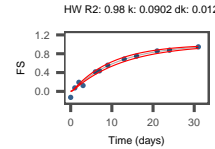

ALDOB – LDQGGAPLAGTNK\_2

AMPL – SAGVDDQENWHEGK\_2

ANXA5\_HUMAN,sp[P48036]ANXA5(Non-Unique) – SIPAYLAETLYYAMK

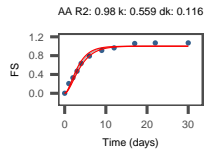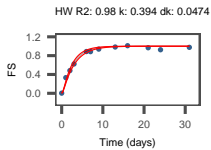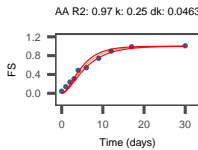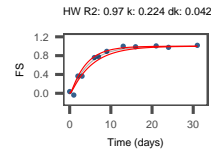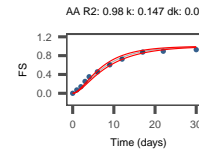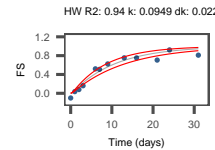

ANXA5\_HUMAN.spjP48036|ANXA5(Non-Unique) – SIPYLAETLYAMK\_3

AOFB – YVISAIPPALGMK\_2

AP2B1 – APEVSQYIYQVDSILK\_3

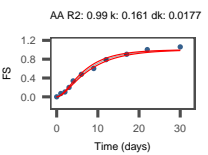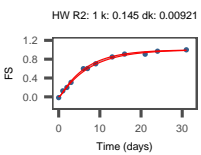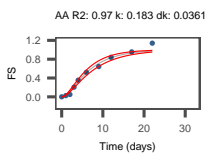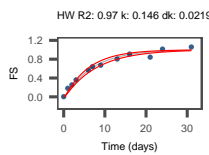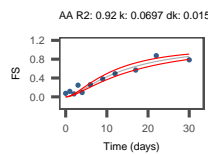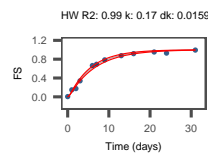

ANXA6 – DAFVAIVQSVK\_2

AOXC – GYQADMWEK\_2

APEH – SFNLSALEK\_2

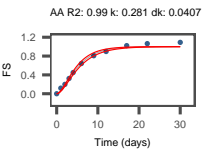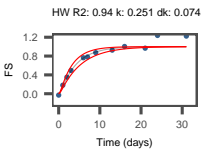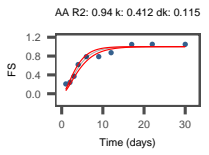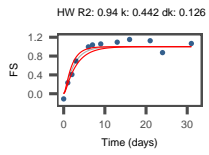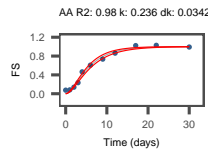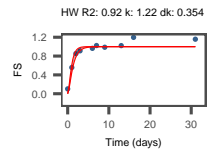

ANXA6 – GTVCAANDFNPDADAK\_2

AOXC – ILELVVNTNK\_2

ARF3(Non-Unique) – DAVLLVFANK\_2

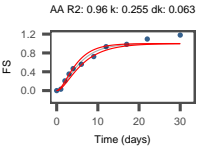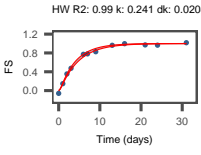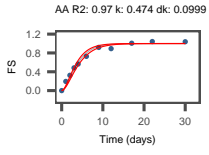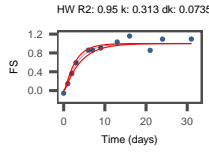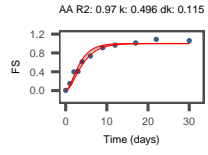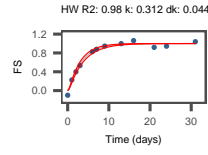

ANXA6 – SLHQAIEGDTSDFMK\_2

AOXC – MACEDQFTNLVPTDQSK\_2

ARF3(Non-Unique) – LGEVITTIPTIGFNVETVEYK\_2

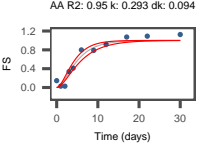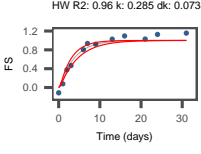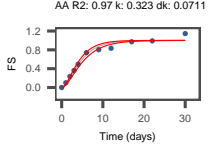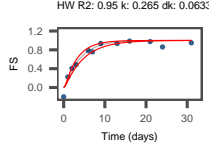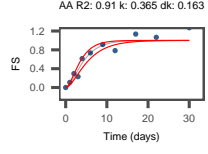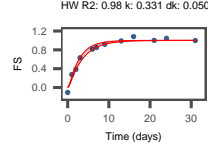

AOFB – APLAEWDYMTMK\_2

AOXC – TTWIAPGLNDLLELK\_2

ARF3(Non-Unique) – QDLPNAMAAEITDK\_2

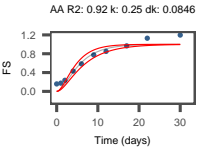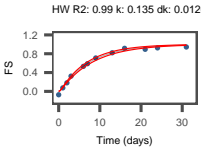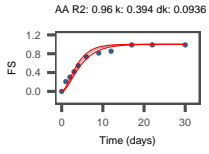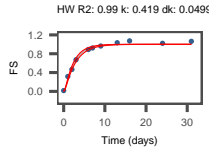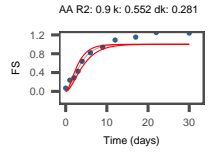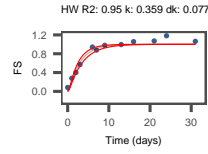

AOFB – TMDMGEQIESPDPWK\_2

AP2A1(Non-Unique) – YLALESMTCLASSEFSHEAVK\_3

ARG1 – ANELAGVVAEVQK\_2

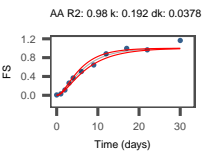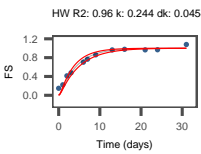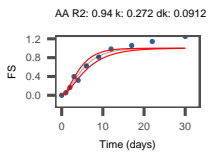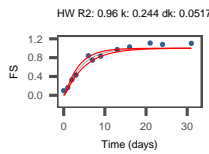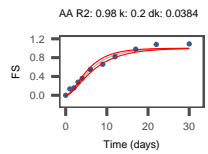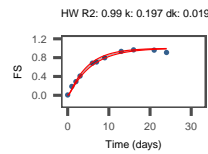





ASSY - TTSLELFMYLNEVAGK\_3

AT1B1 - VAPPGLTQIQPQK\_2

ATP5H - NIIPFDQMTIDDLNEIFPETK\_2

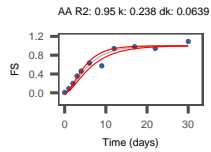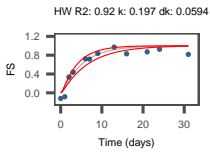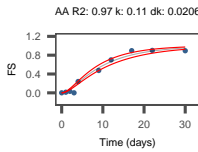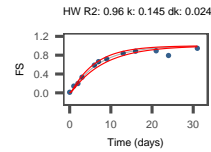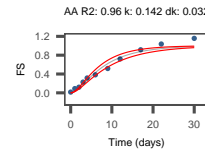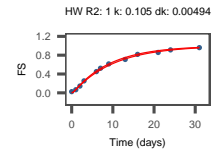

ASSY - VQVSVFK\_2

AT5F1 - LGLIPEEFFQLYPK\_2

ATP5H - NIIPFDQMTIDDLNEIFPETK\_3

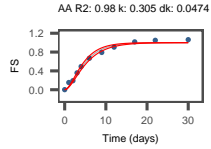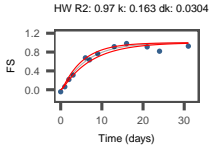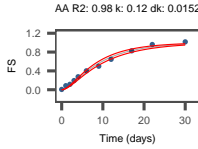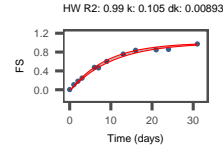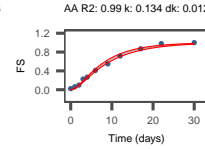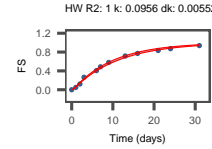

AT1A1 - AVAGDASESALLK\_2

AT5F1 - LGLIPEEFFQLYPK\_3

ATP5H - TIDWVSFVEVMPQNQK\_2

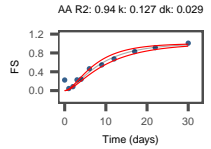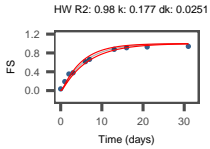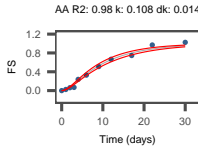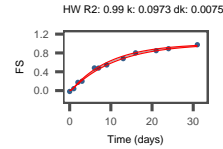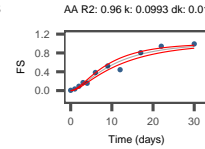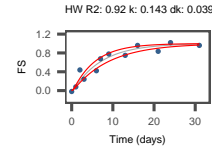

AT1A1 - MSINAEDVVVDLVEVK\_2

AT5F1 - PLPLPEYGGK\_2

ATP5H - TIDWVSFVEVMPQNQK\_3

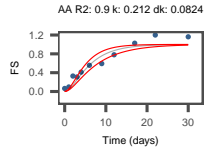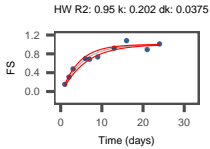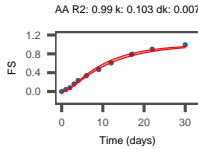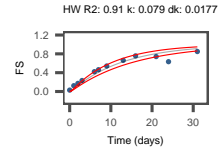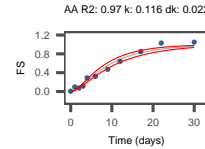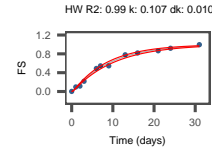

AT1A3(Non-Unique) - DGPNALTPPTTPEVVK\_2

AT5F1 - TGVTPGYVLGTGLSLYFLSK\_2

ATP5I - VPPVQVSLPIK\_2

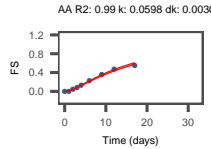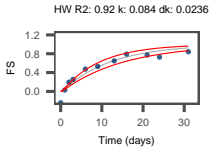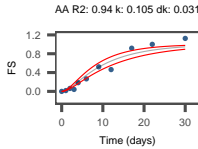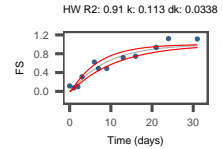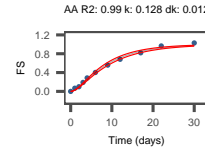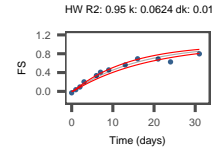

AT1A3(Non-Unique) - QGAINAVTGDGVNDSPALK\_2

ATLA2 - NLVPLLLAPENLVEK\_2

ATP5J - GEMDTFPTFK\_2

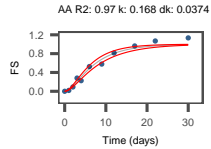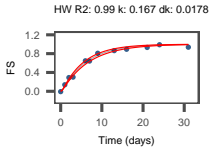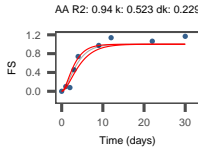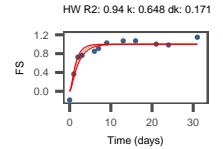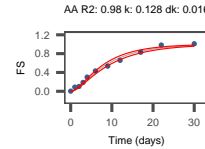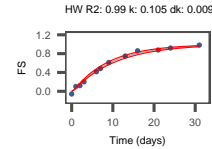



**B2MG – VEMSDMSFSK\_2****BHMT1(Non-Unique) – GFLPASEK\_2****BHMT1 – PYNPMSRPDAWGVTK\_3**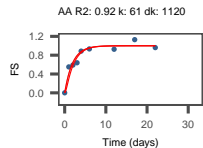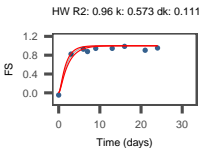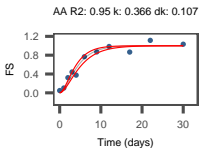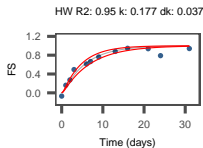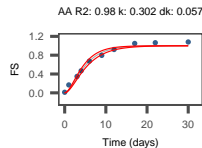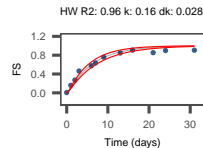**BDH – TIQLNVCNSEEVK\_2****BHMT1 – HGSWGSGLDMHTK\_2****BHMT1 – QVADEGDALVAGGVSQTPSYLSCK\_3**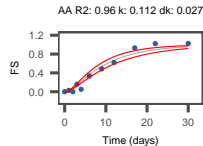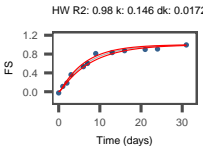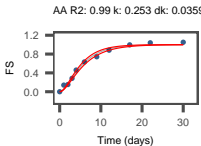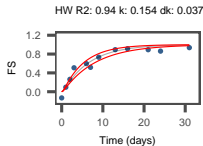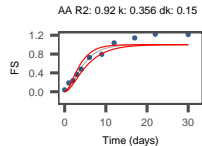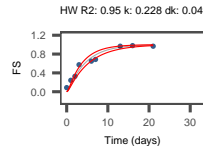**BHMT1 – AGASIVGVNCHFDPSSVLQTVK\_2****BHMT1 – HGSWGSGLDMHTK\_3****BHMT1 – SRPDAWGVTK\_2**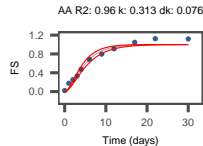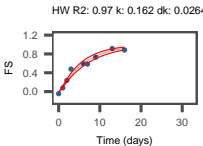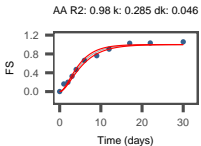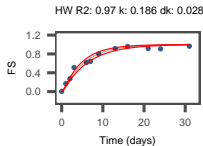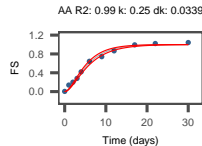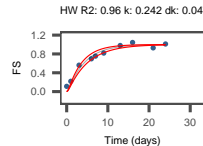**BHMT1 – AGSNVMTFTFYASEDKLENR\_2****BHMT1 – HGSWGSGLDMHTKPW\_3****BHMT1 – TFYASEDKLENR\_2**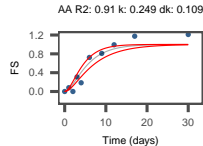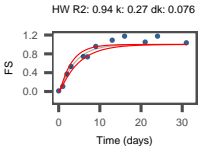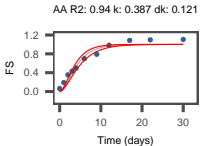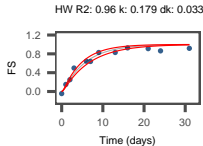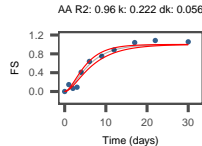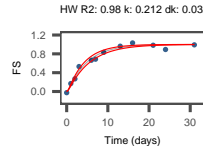**BHMT1 – AGSNVMTFTFYASEDKLENR\_3****BHMT1 – KEYWQNLR\_2****BHMT1 – TFYASEDKLENR\_3**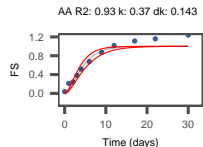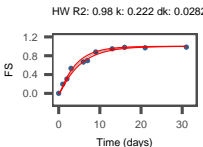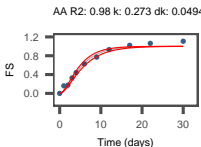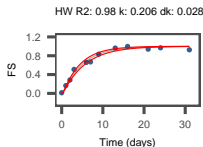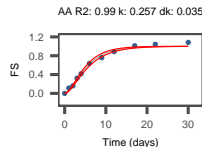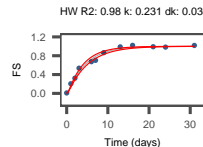**BHMT1 – GAAELMQQK\_2****BHMT1 – PYNPMSRPDAWGVTK\_2****BIP – AKFEELNMDLFR\_3**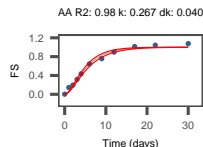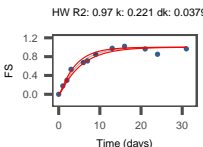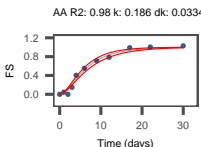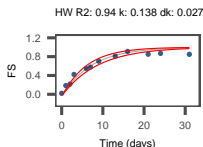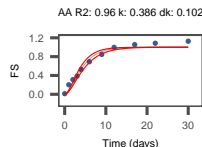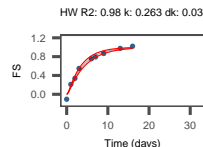

**BIP – IEWLESHQDADIEDFK\_3**

**BIP – TWNDPSVQDDIK\_2**

**BPNT1 – NYEYASHVPESVK\_3**

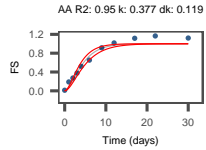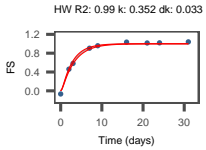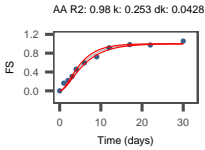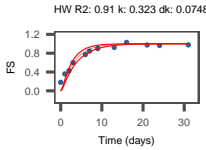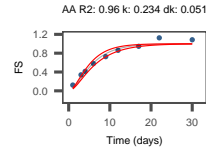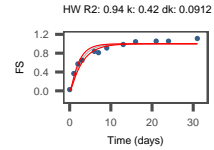

**BIP – LYSGGGPPTGEEDTSEKDEL\_2**

**BIP – VYEGERPLTK\_2**

**C1TC – MFGVPVVAVNVFK\_2**

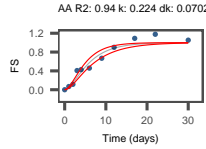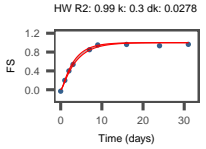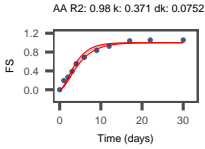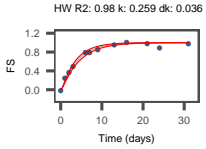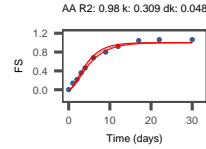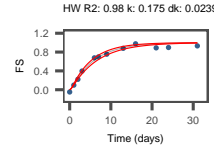

**BIP – NELESYAYSLK\_2**

**BPHL – QVSLLGWSDGGITALIAAAK\_2**

**C1TC – THLSLSHNPEQK\_2**

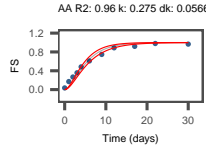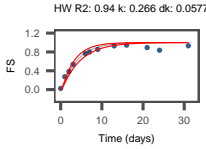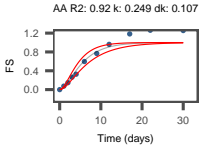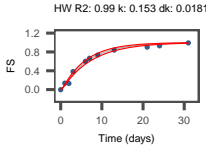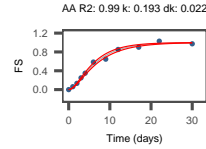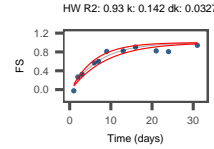

**BIP – NQLTSPENTVFDK\_2**

**BPHL – TCEDWVDGISQFK\_2**

**C1TC – YVVVTGITPTLGEKG\_2**

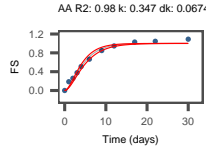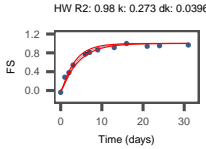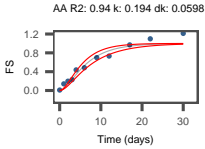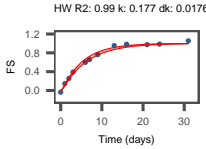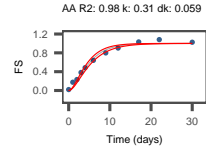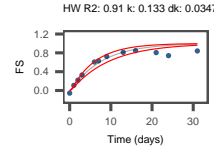

**BIP – SQIFSTASDNQPTVIK\_2**

**BPHL – VGEGEHAILLLPGMLGSGK\_3**

**C560 – NTSSNRPLSPHLTIYK\_2**

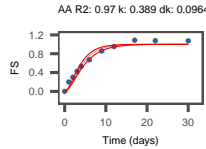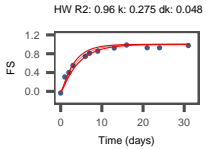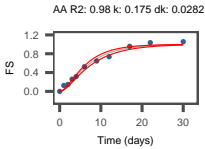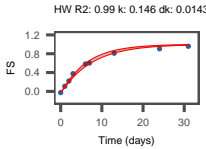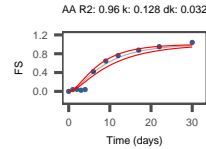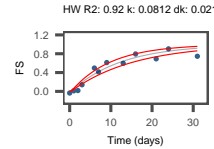

**BIP – TFAPEISAMVLTK\_2**

**BPNT1 – LVASAYSIAQK\_2**

**CAH2\_HUMAN\_sp|P09020|CAH2(Non-Unique) – AVQPDPGLAVLGLFK\_2**

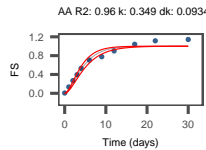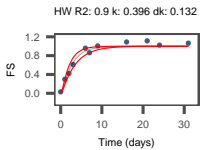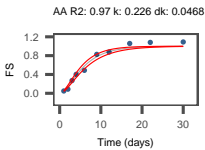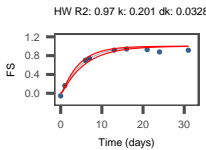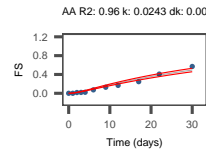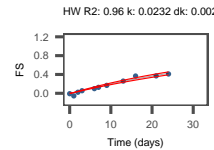

CAH3 – EPM[15.9949]TVSSDQMAK\_2

CAH3 – HDPSLQPWSASYDPGSAK\_2

CAH3 – QPDGIAVVGIFLK\_3

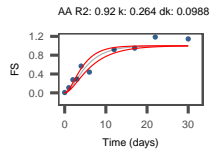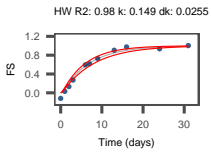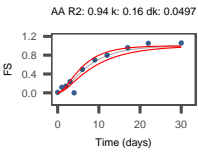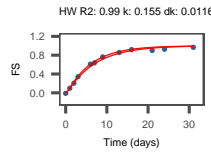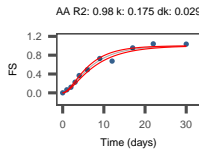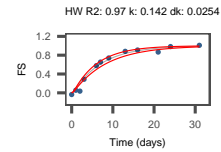

CAH3 – EPMTVSSDQM[15.9949]AK\_2

CAH3 – HGSFTTPPCECIVLLLK\_3

CAH3 – SLFSSAENEPVPLVGNWRPPQPVK\_2

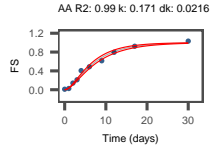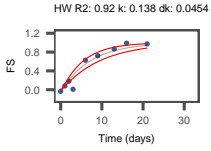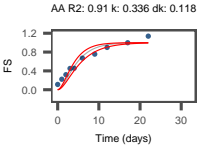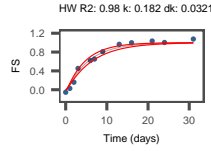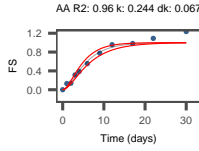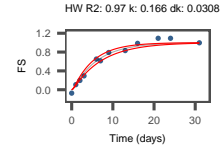

CAH3 – EPMTVSSDQMAK\_2

CAH3 – QFHLHWGSSDDHGSEHTVDGVK\_2

CAH3 – WGSSDDHGSEHTVDGVK\_3

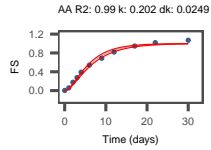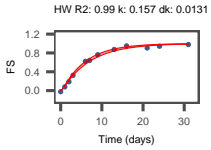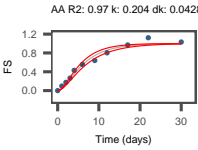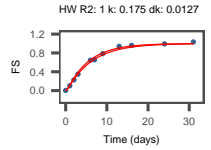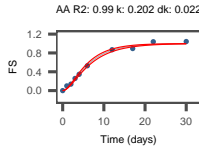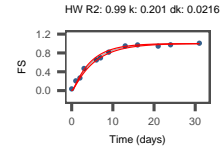

CAH3 – GDNQSPIELHTK\_2

CAH3 – QFHLHWGSSDDHGSEHTVDGVK\_3

CAH3 – YAAELHLVHWNPK\_2

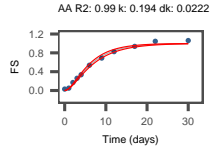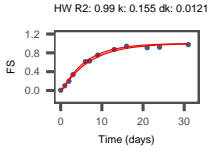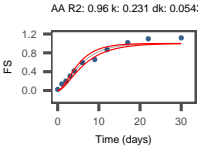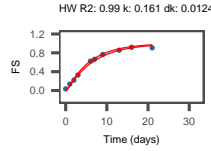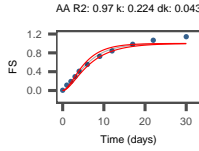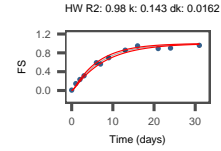

CAH3 – GDNQSPIELHTK\_3

CAH3 – QFHLHWGSSDDHGSEHTVDGVK\_4

CAH3 – YAAELHLVHWNPK\_3

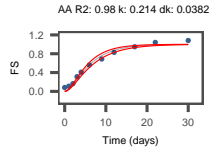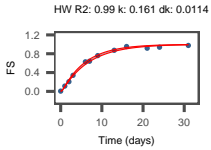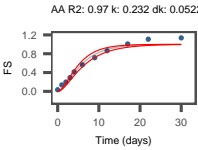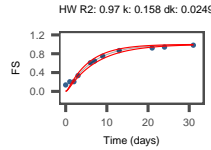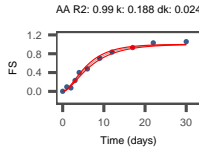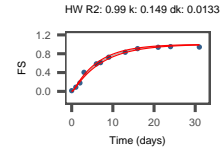

CAH3 – GEFQILLDALDK\_2

CAH3 – QPDGIAVVGIFLK\_2

CAH3 – YAAELHLVHWNPK\_4

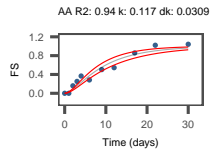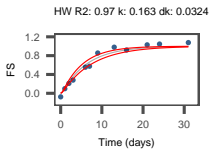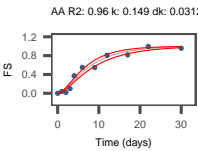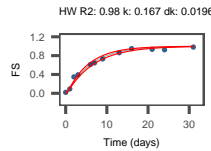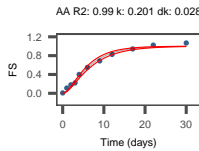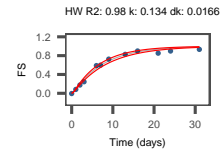



CATA – NAIHTYQAGSHMAAK\_2

CATD – ILDIACWVHHK\_3

CBPQ – IIVNYQPPTYGYEK\_2

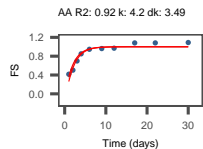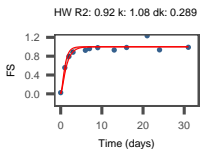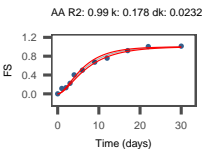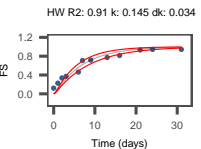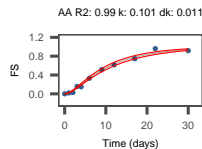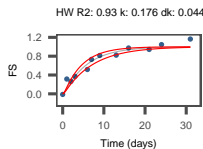

CATA – SALEHSVQCAVDVK\_2

CATD\_HUMAN,sp|P18242|CATD(Non-Unique) – AIGAVPLIQEGYMPCEK\_2

CBR1 – GVHAEEGWPNSAYGVTK\_2

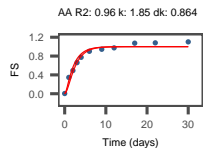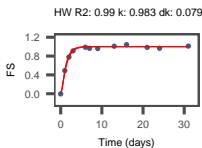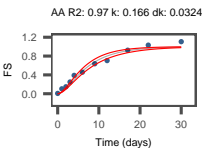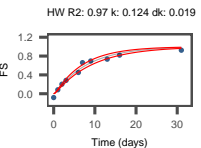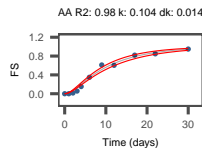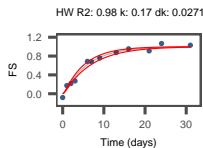

CATA – SALEHSVQCAVDVK\_3

CATD\_HUMAN,sp|P18242|CATD(Non-Unique) – ISVNNVLPVFDNLMQK\_3

CBR4 – TMIQQGGSIVNVGSIIGLK\_2

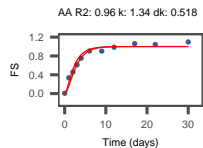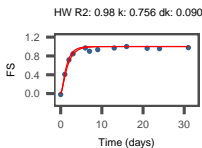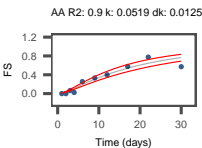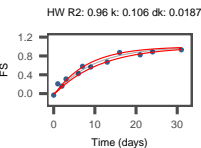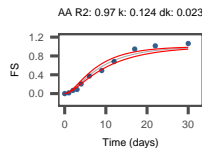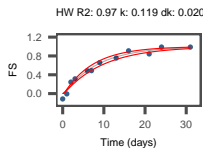

CATB – SCEAGYSPSYK\_2

CATF – ACLGGLPSNAYAIAK\_2

CGL – AVVLPISLATTFK\_2

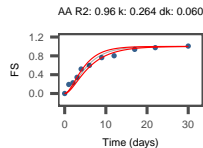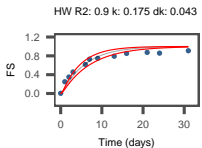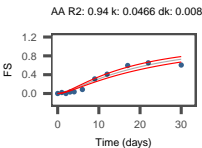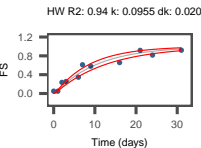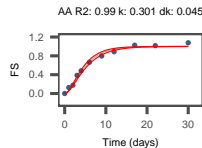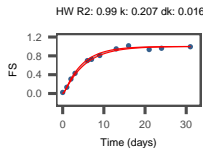

CATB – SWNLWDGNGFFK\_2

CATZ – HGIPDETCNNYQAK\_2

CGL – LLEAITPTQTK\_2

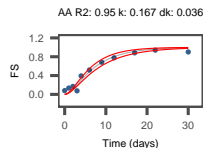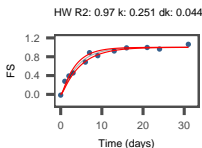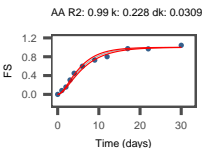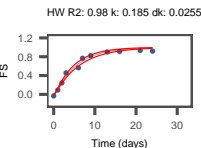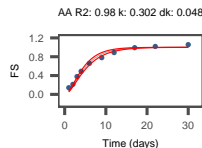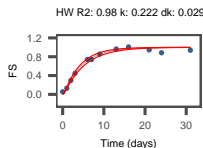

CATD – DPEGQPGEMLMGGTDSK\_2

CATZ – HGIPDETCNNYQAK\_3

CGL – VVYPGLPSHPQHELAK\_2

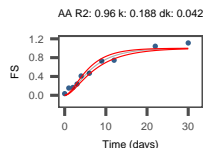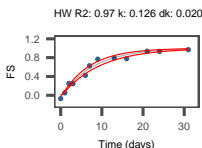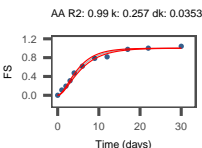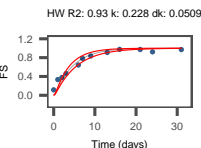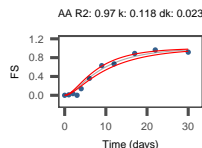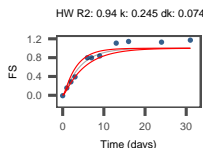



CGL - VVYGPLSPHQHELAK\_4

CH60 - GVMILDAVIAELK\_3

CH60 - VGGTSDVEVNEK\_2

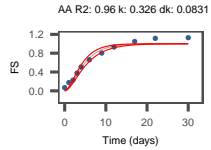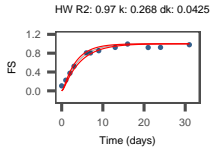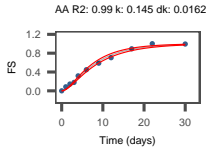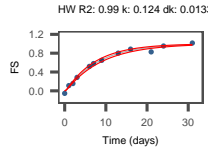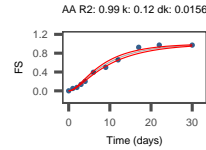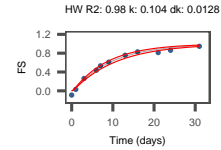

CH10 - VLLPEYGGTK\_2

CH60 - ILQSSSEVGYDAMLGDFVNMVEK\_2

CHDH - ELQGSVSHVQSDK\_2

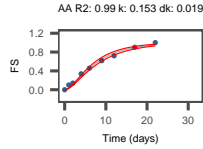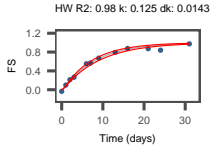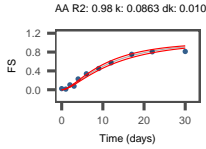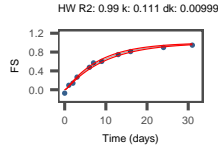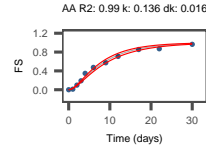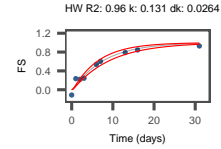

CH10 - VVLDDKDYFLFR\_3

CH60 - ILQSSSEVGYDAMLGDFVNMVEK\_3

CHDH - KPTQAEYQVHVGTMR\_3

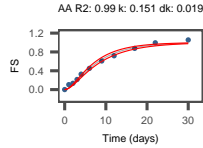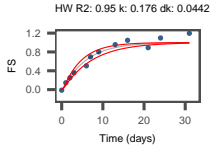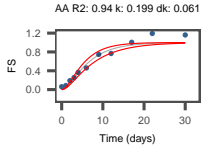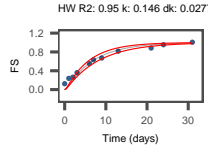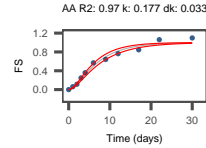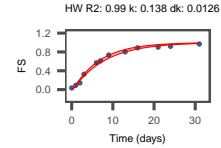

CH60 - CEFQDAYVLLSEK\_2

CH60 - NAGVEGLIVEK\_2

CHDH - SSDPTAVVDAQTK\_2

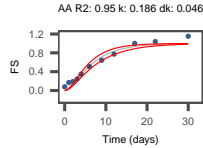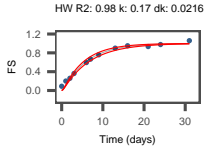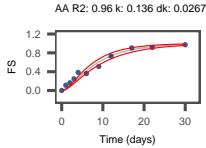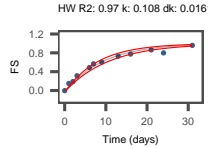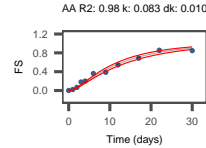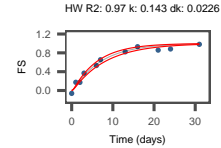

CH60 - CEFQDAYVLLSEK\_3

CH60 - TALLDAAGVASLLTAEAVVTEIPK\_2

CISD1 - VVHAFDMEDLGDK\_3

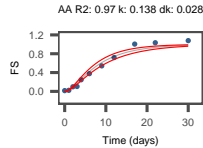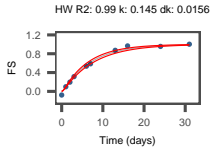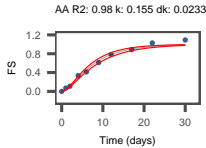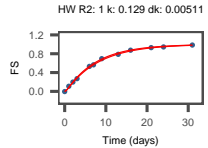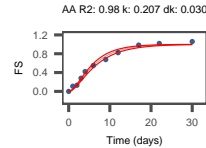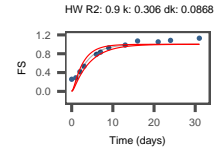

CH60 - DIGNIISDAMK\_2

CH60 - VGEVIVTK\_2

CISY - ALGFPLERPK\_3

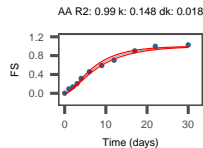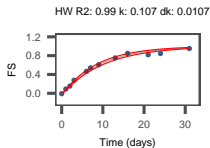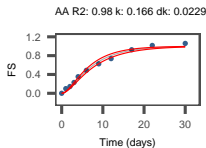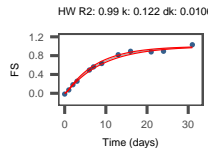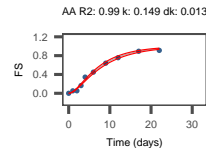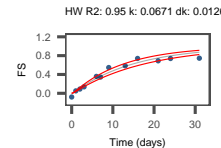

CK054 – AHIMPAEFSSCPLNSDEAVNK\_3

CLH1 – AHTMTDDVTFWK\_3

CLYBL – QIAVVQEQTPTPEK\_2

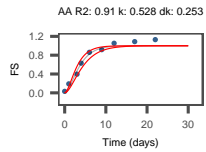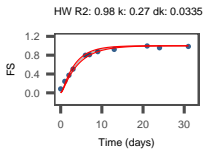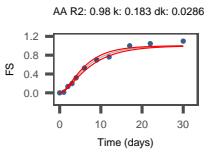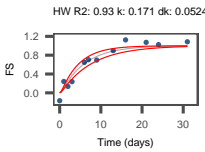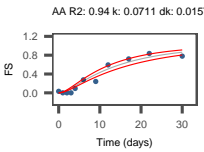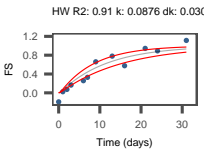

CK054 – APLVCLPVFVSK\_2

CLH1 – ALEHFTDLYDIK\_3

CMBL – IFAENDTVIPLEQVSTLTQK\_2

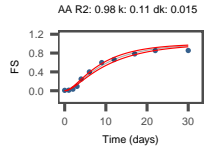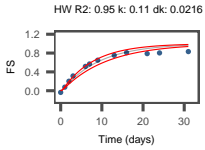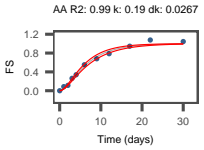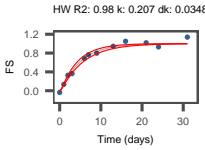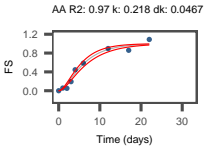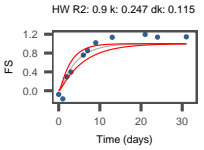

CK054 – IAEVGGVPLLPLVNK\_2

CLH1 – DTAELELLQWFLQEEK\_3

CMBL – LEYGGMGHEVQVEHK\_4

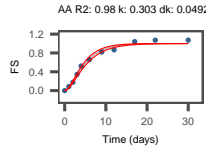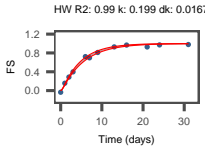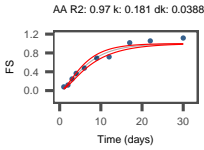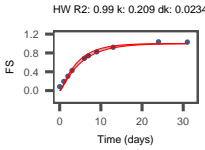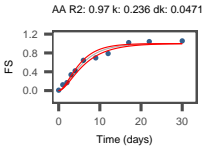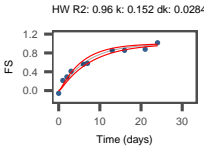

CK054 – WLHFYEMK\_3

CLH1 – GQCDLELINVCNENSLFK\_2

CMBL – NLIEWLNK\_2

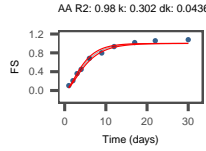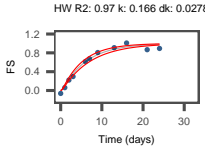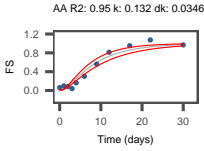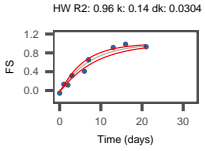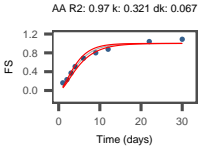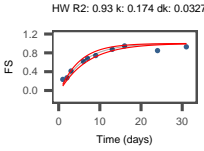

CLH1 – ADDPSSYMEVQAANASGNWEELVK\_3

CLPP – YMPMEAQEFGILDK\_2

CMC1(Non-Unique) – GLPOLIGVAPEK\_2

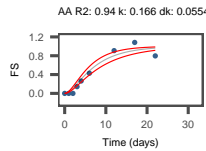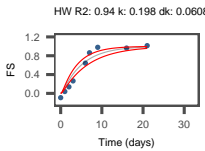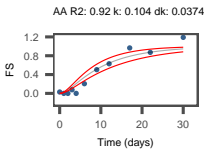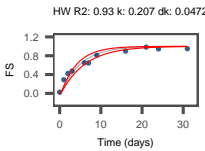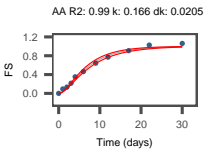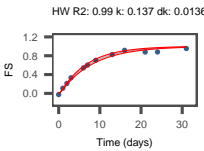

CLH1 – AFMTADLPNELIELLEK\_2

CLYBL – IQWAEELIAAFK\_2

CMC2 – DLGFFGIYK\_2

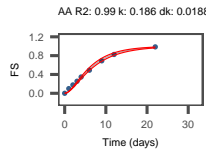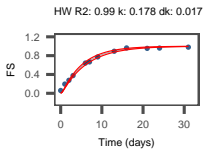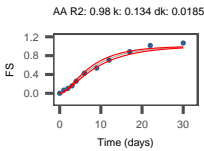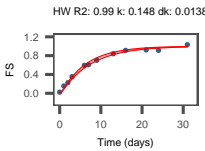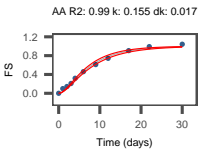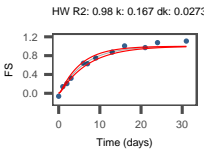

CMC2 – FGLGSIAGAVGATAVYPIDLVK\_2

COMT – AVYQPGGSSPVK\_2

COPB2 – SFKPDFGAESIVGGFLLGVR\_3

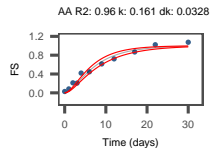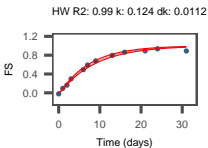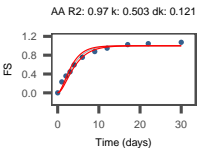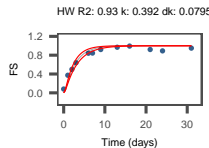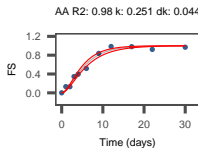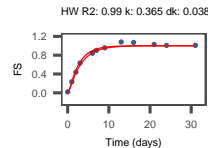

CMC2 – STGSFVGLMYK\_2

COMT – GSSSFECTHYSSYLEYMK\_3

COPG1 – VPSVSSALVSSLHLK\_3

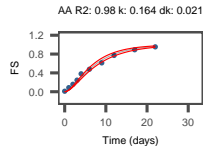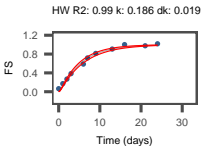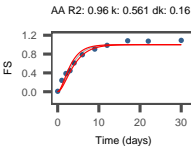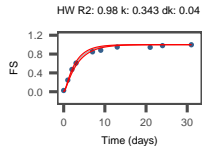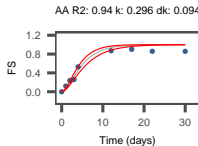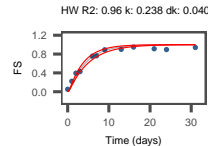

CMC2 – YLNIFGESQPNPK\_2

COMT – KGTVLLADNVIVGTPDFLAY\_2

COPG2(Non-Unique) – SIATLAITLLK\_2

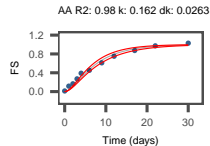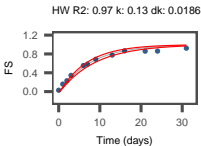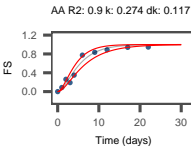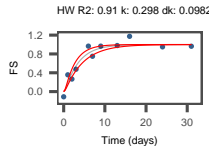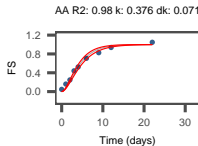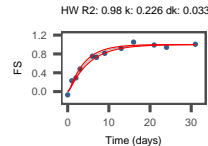

COF1 – HELQANCYEEVK\_2

COMT – PGDPQSVLEAIDTYCSEK\_2

COX1 – VFSWLATLHGGNIK\_3

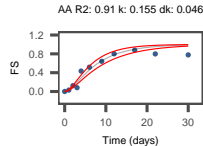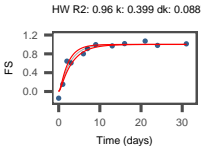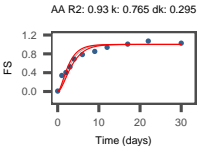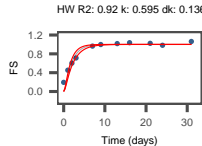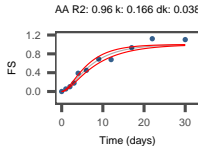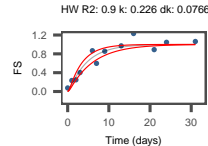

COF1 – HELQANCYEEVKDR\_3

COMT – VSLIGASQDLIPQLK\_2

COX2 – MLISSEDLVLSHWAVPSLGLK\_3

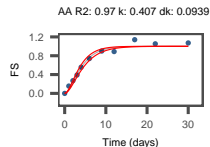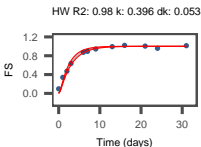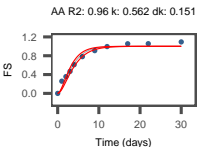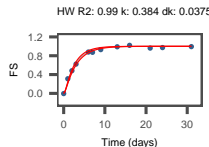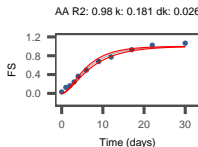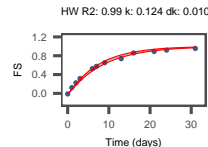

COF1(Non-Unique) – YALYDATYETK\_2

COMT – VSLIGASQDLIPQLK\_3

COX3 – EGTYQGHTPIVQK\_2

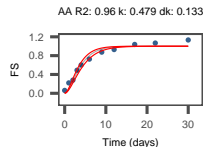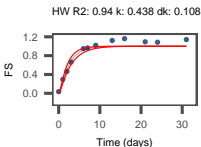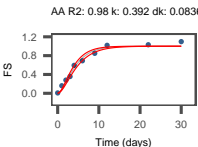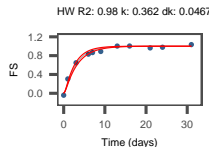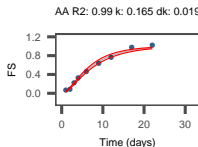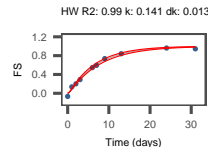

COX41 – DYPLPDVAHVMTLSASQK\_2

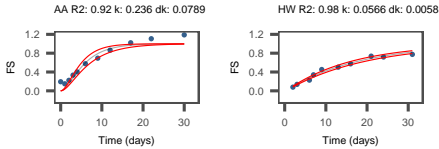

CP1A1(Non-Unique) – IGSTPVVLSGLNTIK\_2

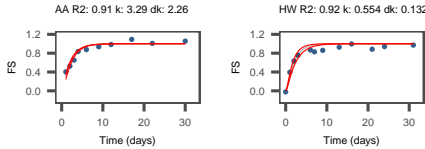

CP27A – DHMDQWK\_2

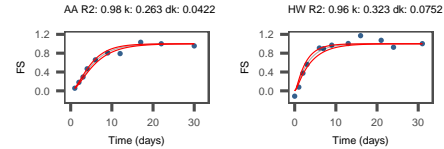

COX41 – DYPLPDVAHVMTLSASQK\_3

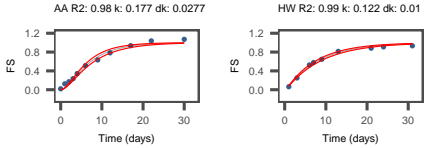

CP237(Non-Unique) – DFLNLMEK\_2

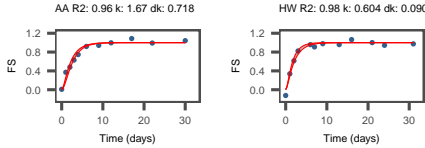

CP27A – SPEIQEALHK\_3

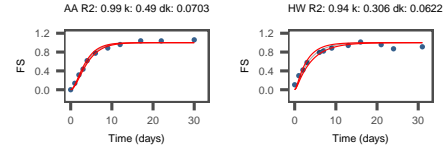

COX5A – VIQELRPTLNELGISTPEELGLDKV\_3

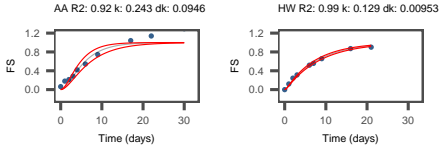

CP237(Non-Unique) – DRDFNLMEK\_3

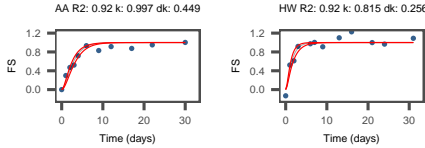

CP2AC – DFISFLIHMQK\_3

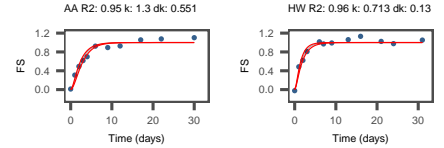

COX5A – WVTFYFKPIDAWELR\_3

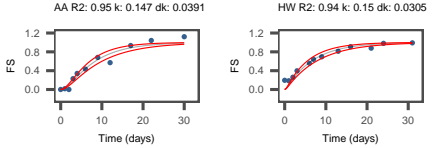

CP237(Non-Unique) – LPPGPTPLPIGNLQIDVK\_3

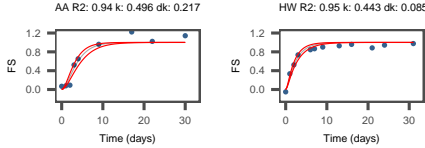

CP2AC – FAASPTGQLYDMFHSMVK\_3

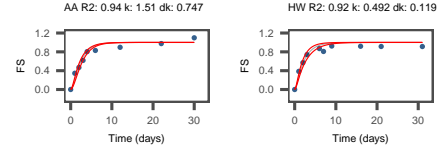

COX6C – NYDSMKDFEEMR\_2

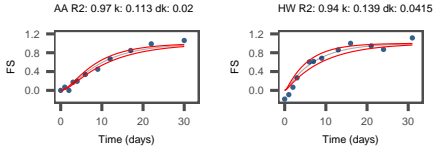

CP254 – DRDFNLLEK\_3

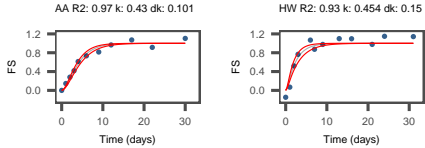

CP2CT – FIDLLPTSLPHAVTCDIK\_3

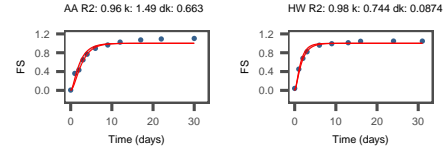

COX6C – NYDSMKDFEEMR\_3

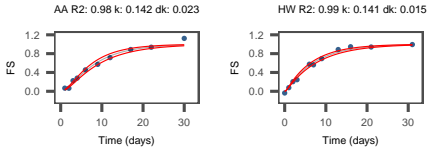

CP27A – DFAHMLLK\_3

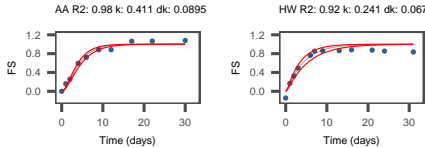

CP2CT – GTTVITLSSVLHDSK\_3

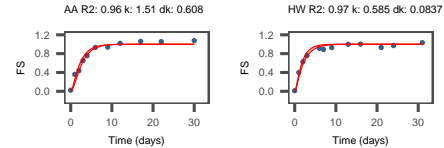

CP2CT - LPPGPPTLPIGNFLQIDVK\_2

CP2DQ - DLTDAFLAEVK\_2

CPSM - AISGPFNVQLVK\_2

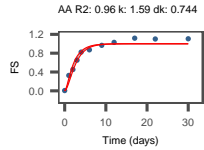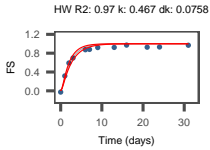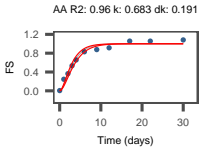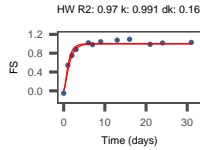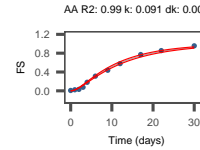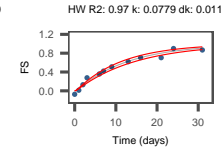

CP2CT - LPPGPPTLPIGNFLQIDVK\_3

CP2F2 - LLTIHFINDNFK\_3

CPSM - AVQFHPEVSPGPTDTEYLDFSFFSLIK\_3

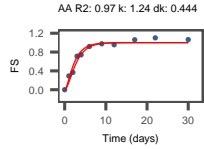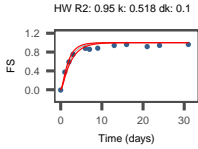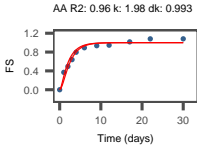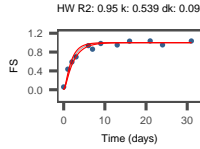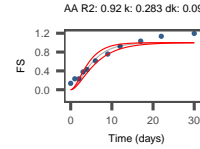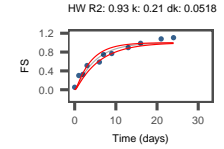

CP2CT - PTVILHG YEAVK\_2

CP2F2 - PVIVLSGYQTVK\_2

CPSM(Non-Unique) - DLLNMDK\_2

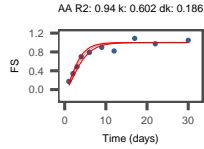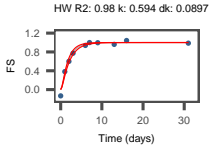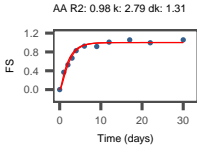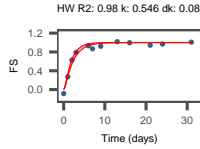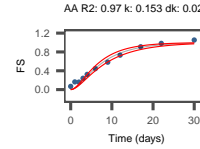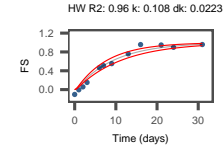

CP2CT - PTVILHG YEAVK\_3

CP2F2 - TPQEFNPEHFLLDDNHSFK\_4

CPSM - EPLFGISTGNIITGLAAGAK\_3

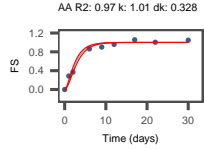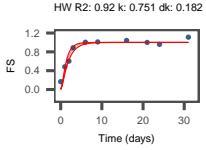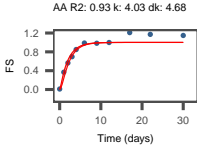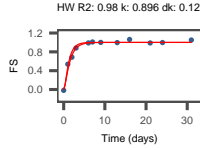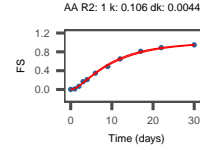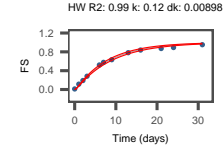

CP2D9(Non-Unique) - NLTDAFLAEIEK\_2

CP2J5 - DFIDAFLEMQK\_2

CPSM - EWPANLDLK\_2

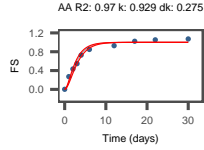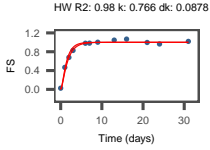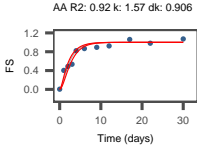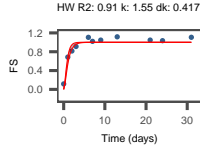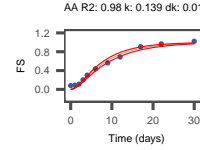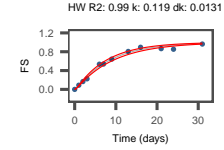

CP2D9 - YDGVFSLQMAWK\_2

CPSM - AFAISGPFNVQLVK\_3

CPSM - FLGVAEQLHNEGFK\_2

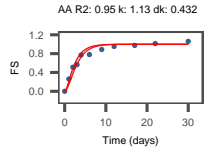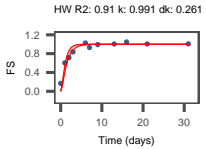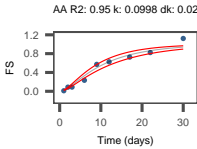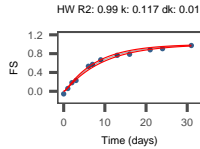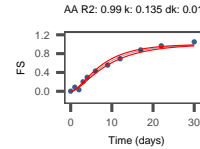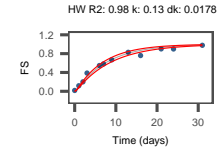

CPSM - FLIPTPQFVTEIK\_2

AA R2: 0.94 k: 0.0183 dk: 0.00233

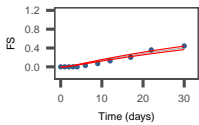

HW R2: 0.97 k: 0.107 dk: 0.0179

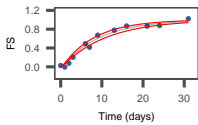

CPSM - NLAVPLYK\_2

AA R2: 0.95 k: 0.209 dk: 0.053

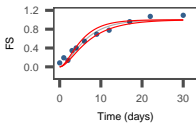

HW R2: 0.99 k: 0.0978 dk: 0.0090

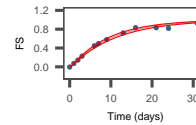

CPSM - RLPTLEQPIIPSDYVAIK\_2

AA R2: 0.98 k: 0.149 dk: 0.0212

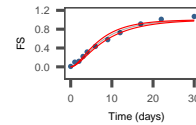

HW R2: 1 k: 0.113 dk: 0.007

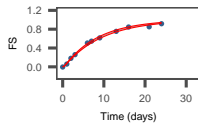

CPSM - GTTITSVLPK\_2

AA R2: 0.99 k: 0.161 dk: 0.021

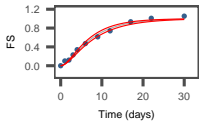

HW R2: 0.97 k: 0.0969 dk: 0.0157

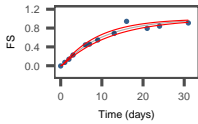

CPSM - PSYVLGSGAMNVFSEDMK\_2

AA R2: 0.95 k: 0.127 dk: 0.0324

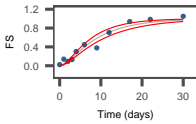

HW R2: 0.91 k: 0.115 dk: 0.0434

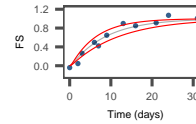

CPSM - RLPTLEQPIIPSDYVAIK\_3

AA R2: 0.98 k: 0.147 dk: 0.0219

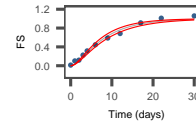

HW R2: 0.99 k: 0.114 dk: 0.0079

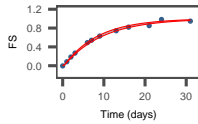

CPSM - IALGIPLPEIK\_2

AA R2: 0.97 k: 0.122 dk: 0.0235

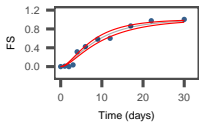

HW R2: 0.98 k: 0.0931 dk: 0.0129

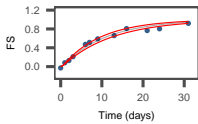

CPSM - PSYVLGSGAMNVFSEDMKR\_2

AA R2: 0.95 k: 0.169 dk: 0.0429

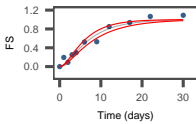

HW R2: 0.95 k: 0.124 dk: 0.0315

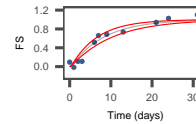

CPSM - SIGQAGEFDYSGSQAVK\_2

AA R2: 0.94 k: 0.27 dk: 0.0808

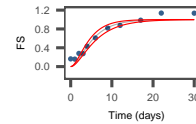

HW R2: 0.99 k: 0.114 dk: 0.0122

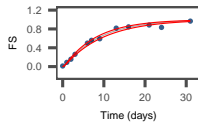

CPSM - IAPSFAVESMEDALK\_3

AA R2: 0.97 k: 0.137 dk: 0.0266

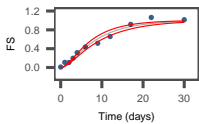

HW R2: 0.99 k: 0.121 dk: 0.00911

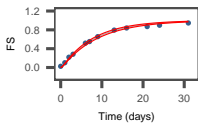

CPSM - PSYVLGSGAMNVFSEDMKR\_3

AA R2: 0.93 k: 0.246 dk: 0.0752

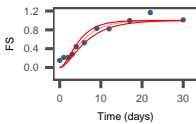

HW R2: 0.91 k: 0.101 dk: 0.0325

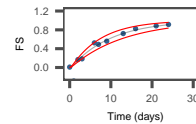

CPSM - SLGQWLQEEK\_2

AA R2: 0.99 k: 0.134 dk: 0.0165

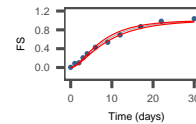

HW R2: 0.98 k: 0.11 dk: 0.0132

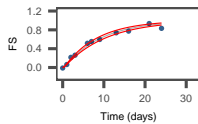

CPSM - IASVQTEVGLK\_2

AA R2: 0.99 k: 0.14 dk: 0.0171

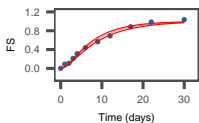

HW R2: 0.99 k: 0.123 dk: 0.00784

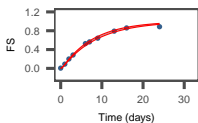

CPSM - QAFITAQNHGALDNTLPAGWK\_2

AA R2: 0.96 k: 0.152 dk: 0.0346

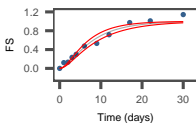

HW R2: 0.95 k: 0.138 dk: 0.0259

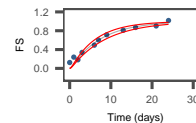

CPSM - TAHIVLEDGTK\_3

AA R2: 0.99 k: 0.14 dk: 0.0172

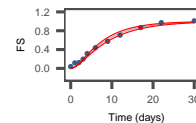

HW R2: 1 k: 0.154 dk: 0.0107

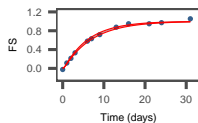

CPSM - IEFEGSVDVDPNK\_2

AA R2: 0.97 k: 0.126 dk: 0.0272

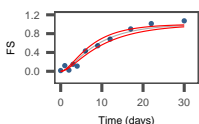

HW R2: 1 k: 0.129 dk: 0.00831

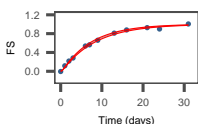

CPSM - QNLIAEVSTK\_2

AA R2: 0.99 k: 0.137 dk: 0.016

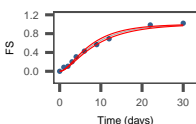

HW R2: 0.99 k: 0.119 dk: 0.0111

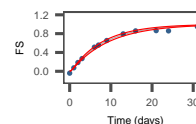

CPSM - TAVDSGIALLTNFQVTK\_2

AA R2: 0.92 k: 0.0867 dk: 0.0285

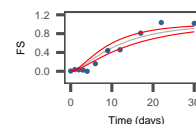

HW R2: 0.92 k: 0.128 dk: 0.0379

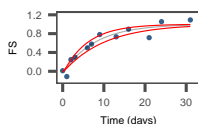

CPSM - TSACFEPSLDYM[15.9949]VTK\_2

CPSM - VSQEHVPLTK\_2

CPT2 - YQGQTVAYESCSTAFAK\_2

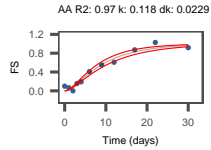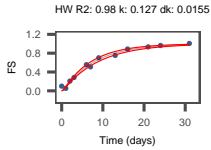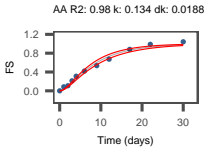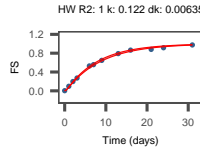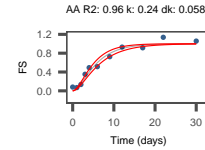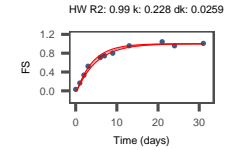

CPSM - TSACFEPSLDMVTK\_3

CPSM - VVAVDCGJK\_2

CSAD - ALPLALFTSK\_2

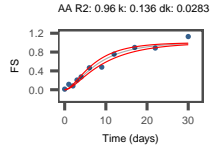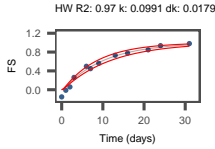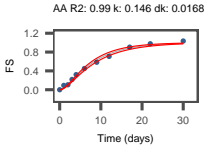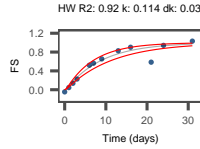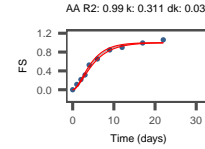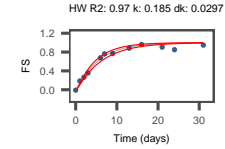

CPSM - TVLMNPNIASVQTNEVGLK\_3

CPSM - YMESDGJK\_2

CSAD - CHGSQASYLFQQDK\_2

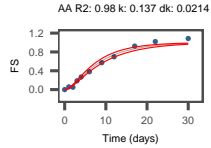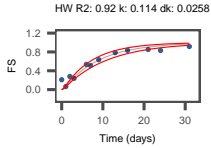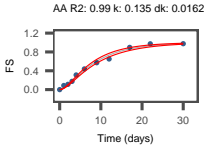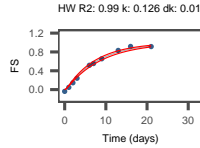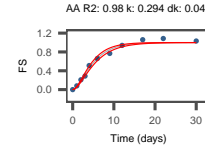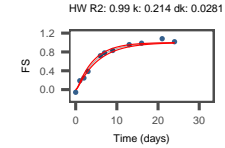

CPSM - TVVVCNCPETVSTDFDECDK\_2

CPT1A - YLAVDSPLFK\_2

CSAD - CHGSQASYLFQQDK\_3

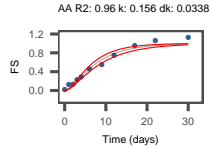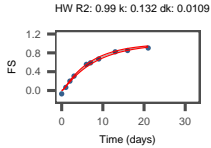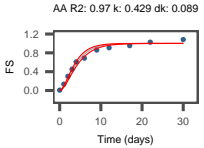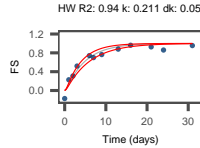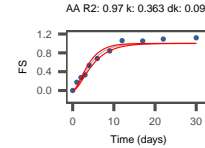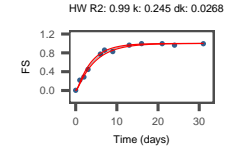

CPSM - VAQAPWK\_2

CPT2 - ELHALLAQDK\_2

CSAD - FYDVALDTGDK\_2

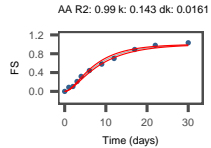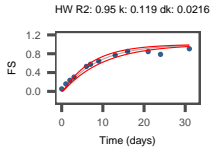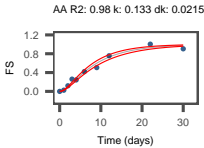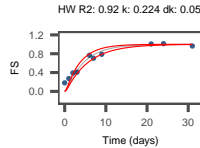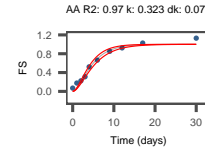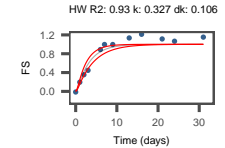

CPSM - VMIGESIDEK\_2

CPT2 - ELHALLAQDK\_3

CSAD - LSQAVPLK\_2

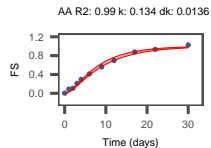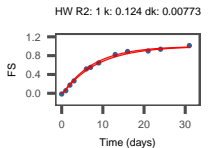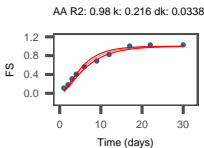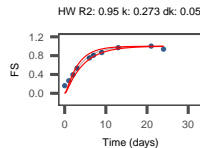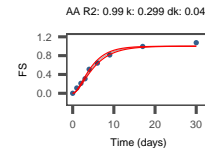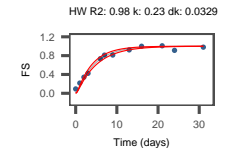

CSN2 – AHTDFFEAFK\_3

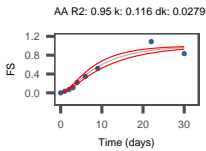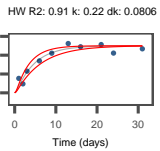

CY1 – ALAAEEVQDGPNDGEMFMFRPGK\_3

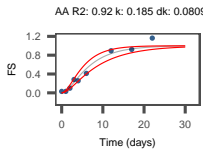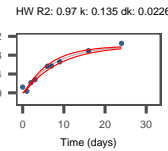

CYC – TGQAAGFSYTDANK\_2

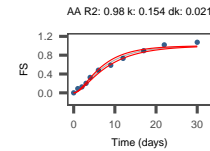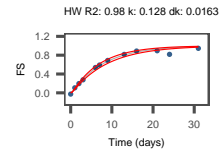

CSN4 – LYNNITFEELGALLEIPAAK\_2

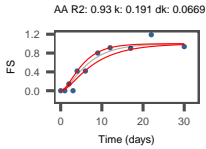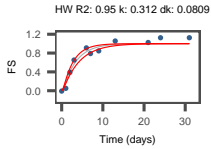

CY1 – HLVGVCYTEEEAK\_2

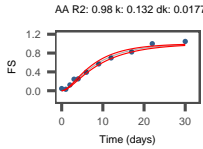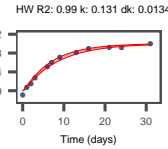

CYC\_HORSE\_sp|P00015|CYC2(Non-Unique) – MIFAGIK\_2

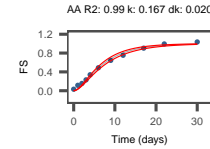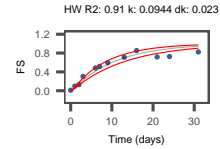

CSR1P1 – HEEAPGHRPTTPNASK\_4

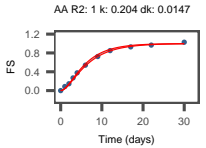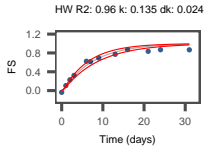

CYB5 – STWVILHKK\_2

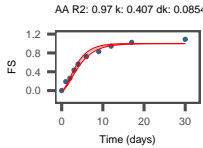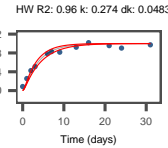

DCXR – AVIQVSQIVAK\_2

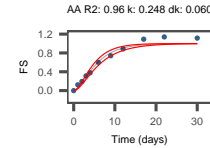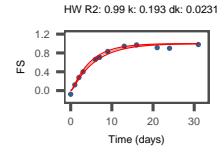

CTND1 – DMDLVEITGTLWNLSSHDSIK\_3

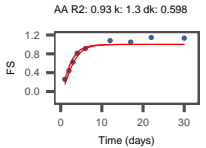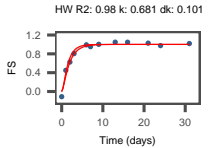

CYB5 – STWVILHKK\_3

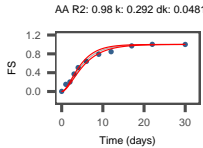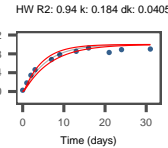

DCXR – MMALELPHK\_3

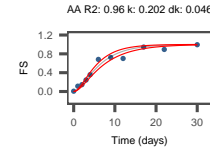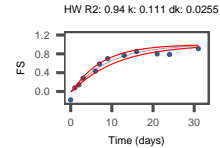

CTND1 – GIPILGLLDHPK\_3

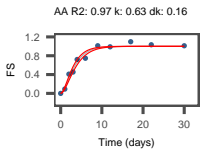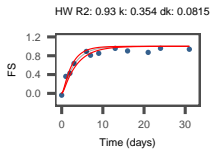

CYC – GITWGEDTLMEYLENPK\_2

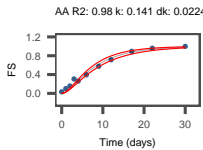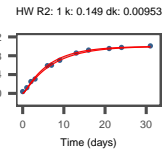

DDAH1 – SFCSMAGPNLIAIGSSESAQK\_2

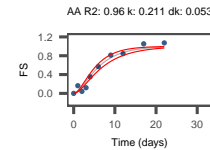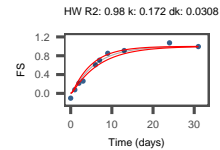

CX6A1 – VALPGVGVSMNLVFLK\_2

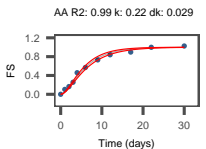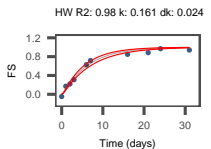

CYC – GITWGEDTLMEYLENPK\_3

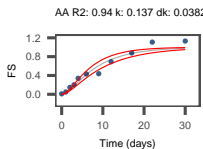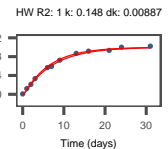

DDB1 – DLLFILAK\_2

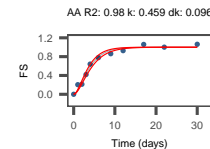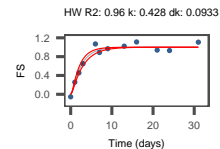



DDX1 - DLGLAFAIEPAHK\_3

DEST - HFVGMLEPK\_2

DHB4 - PVYPGQLQTEMWK\_2

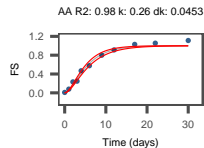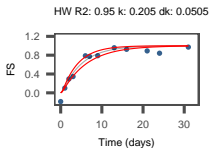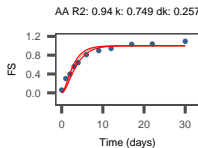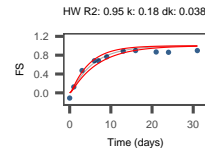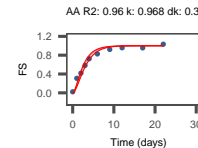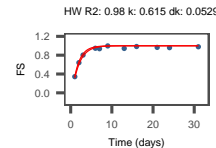

DDX3L(Non-Unique) - SFLDLLNATGK\_2

DHB12 - AFVDFFSQCLHEEYK\_3

DHB4 - TSHAAPAATSGFVGAVGHK\_2

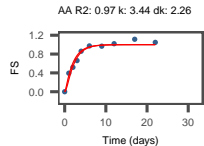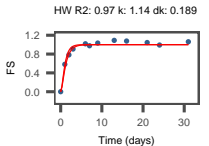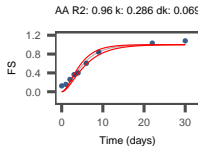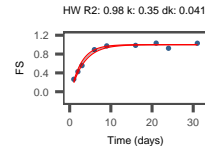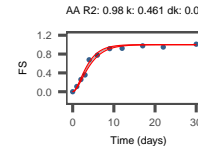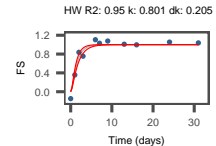

DECR - FDGEEVFLSGEFNSLK\_2

DHB13 - LVLWDINKR\_3

DHB4 - TSHAAPAATSGFVGAVGHK\_3

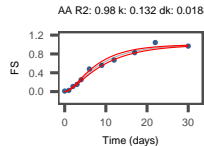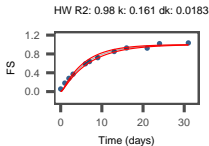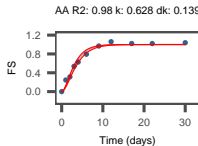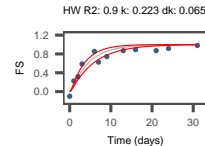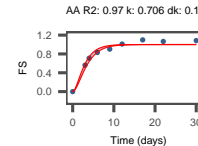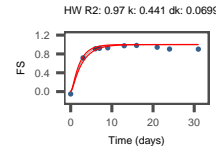

DECR - VAFITGGGTGLGK\_2

DHB4 - AVANYDSVEAGEK\_2

DHB5(Non-Unique) - EDIFYTSK\_2

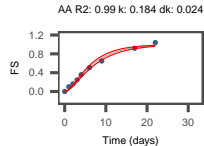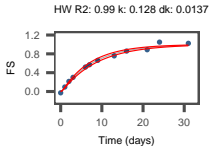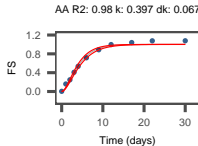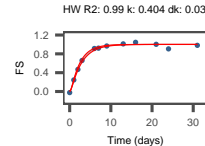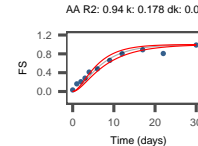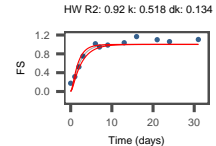

DECR - VTKEEWIDIEGLR\_3

DHB4 - FVYEGSADFSLPTFGVIVAQK\_2

DHB5 - ENMQVFELQTSEDMK\_2

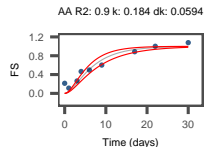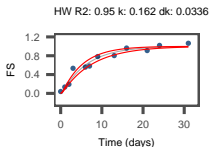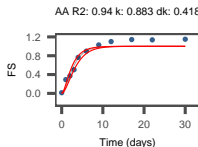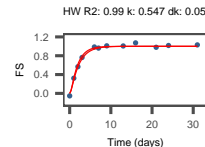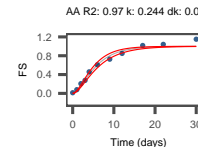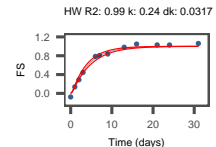

DEST - EILVGDVGATITDPFK\_2

DHB4 - PQTIQESTGGIVEVLHK\_3

DHB5 - HIDSASMYQNEK\_2

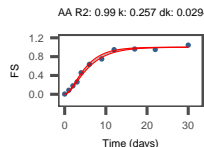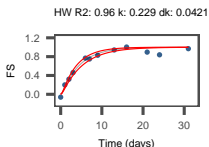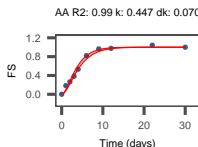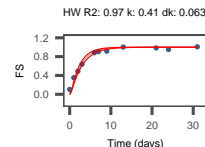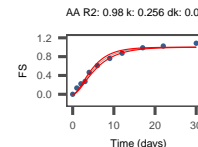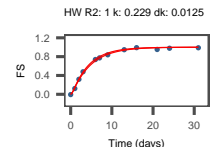

DHB5 - HIDSASMYQNEK\_3

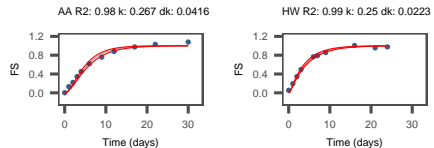

DHB5(Non-Unique) - YKPCVNCQVEHPY\_2

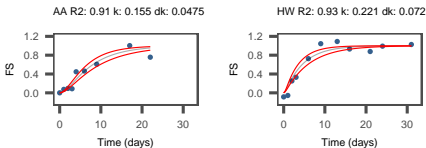

DHE3\_BOVIN,sp|P26443|DHE3(Non-Unique) - FTMELAK\_2

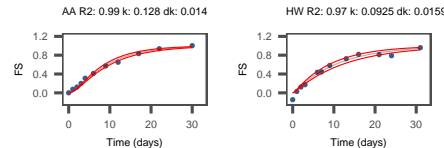

DHB5 - LSDGHFIPILFGFYAPQEVK\_2

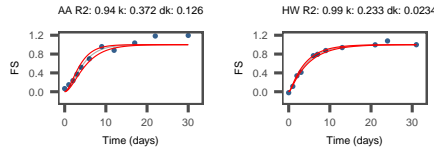

DHCR7 - AIECSYTSADGLK\_2

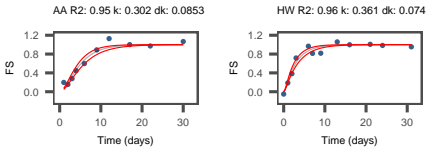

DHE3\_BOVIN,sp|P26443|DHE3(Non-Unique) - NYTDNLEK\_2

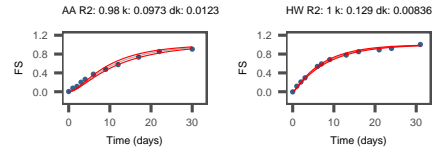

DHB5 - LSDGHFIPILFGFYAPQEVK\_3

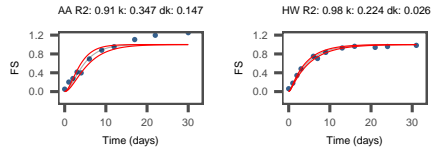

DHDH - AVLCEKPMGVNAEVR\_3

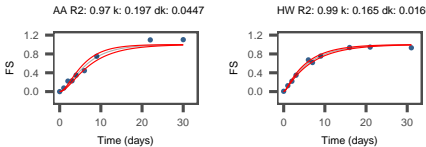

DHE3\_BOVIN,sp|P26443|DHE3(Non-Unique) - SEAAADREDDPNFFK\_2

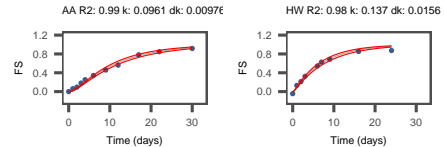

DHB5 - QLQLDYVDLYLIHFPMAMK\_3

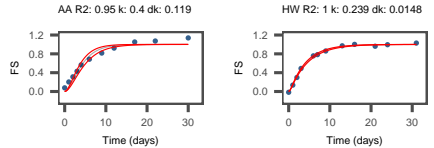

DHE3 - LQHSGILGPK\_3

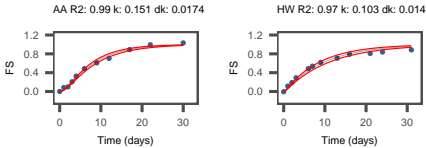

DHE3\_BOVIN,sp|P26443|DHE3(Non-Unique) - VTGKPSQGGIHR\_4

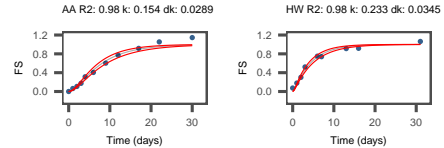

DHB5(Non-Unique) - REDIFYTSK\_2

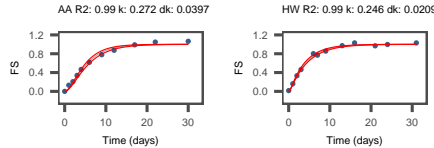

DHE3 - VYEGSILEADCILIPAASEK\_2

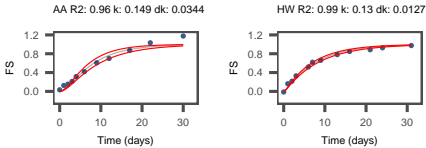

DHI1 - EISGIINAQASP\_K\_2

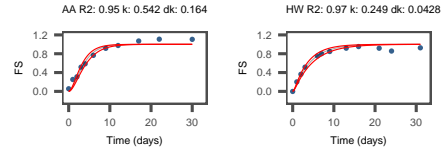

DHB5 - VCLEQSLK\_2

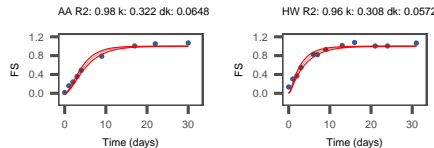

DHE3\_BOVIN,sp|P26443|DHE3(Non-Unique) - CAVVDVPPFGGAK\_2

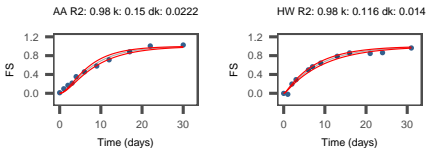

DHPR - AALDGTGPMIGYMAK\_2

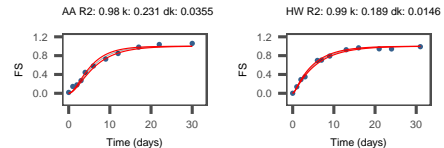

DHPR – EGGLTLGAK\_2

DHPR – QSMWTSTISHLATK\_3

DHRS1 – LDVLNNAYAGQAILNTNK\_3

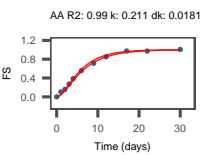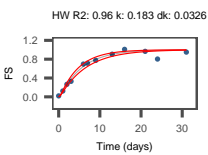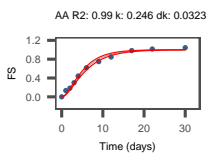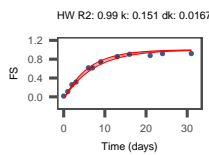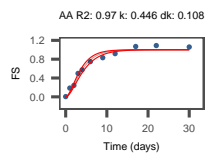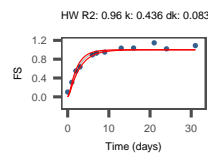

DHPR – GAVHQLCQSLAGK\_2

DHPR – RPNNGSLIQVTTDGK\_2

DHRS4 – AREDFIK\_2

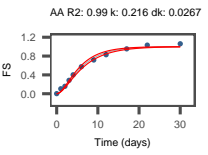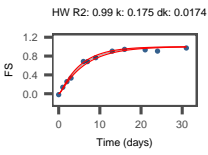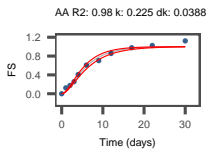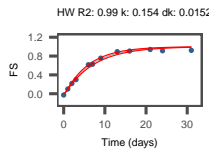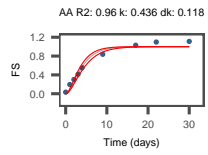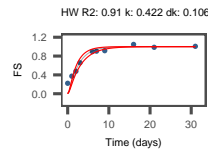

DHPR – GAVHQLCQSLAGK\_3

DHPR – RPNNGSLIQVTTDGK\_3

DHRS4 – TALLGLTK\_2

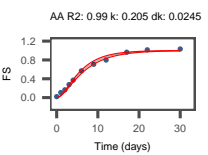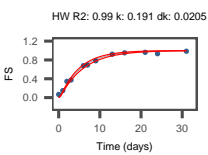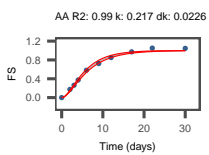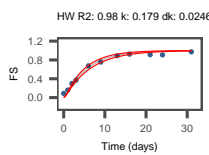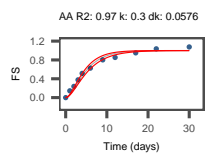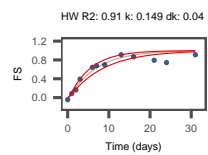

DHPR – MTDSFTEQADQVTADV GK\_2

DHRS1 – CVPVCDSSQSEV K\_2

DHSO – ETPQEIA SK\_2

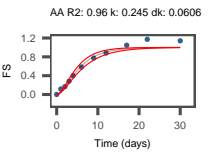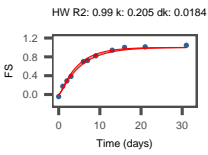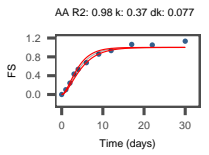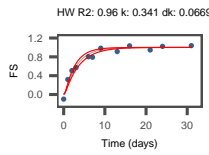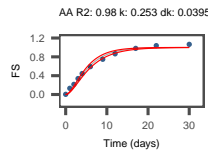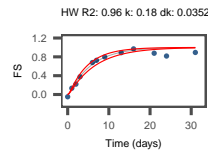

DHPR – NCDMMWK\_2

DHRS1 – HGVSYSLWPLQLVTEMVK\_3

DHSO – HNADFCK\_2

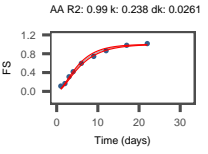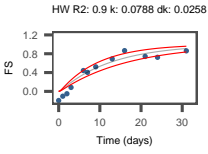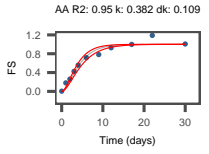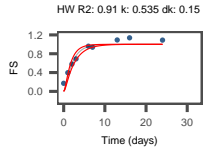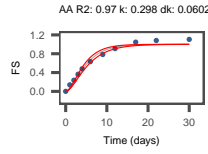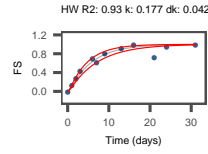

DHPR – QSMWTSTISHLATK\_2

DHRS1 – LDVLNNAYAGQAILNTNK\_2

DHSO – LENYPIPELGPNDVLLK\_3

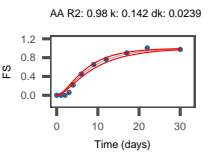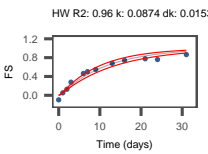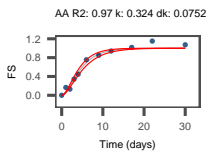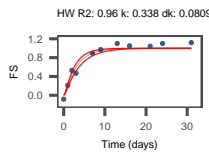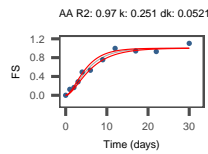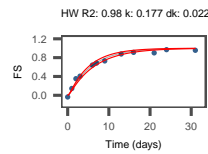

DHSO - TLNVKPLVTHR\_2

DIC - VHLTQEQVK\_3

DLDH - NETLGGTCLNVGCIPIK\_2

AA R2: 0.98 k: 0.231 dk: 0.0336

HW R2: 0.92 k: 0.0855 dk: 0.0205

AA R2: 0.99 k: 0.264 dk: 0.0286

HW R2: 0.98 k: 0.266 dk: 0.036

AA R2: 0.98 k: 0.153 dk: 0.0222

HW R2: 0.99 k: 0.0979 dk: 0.0083

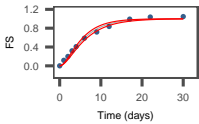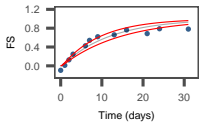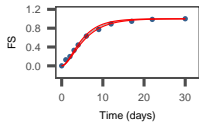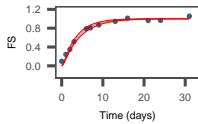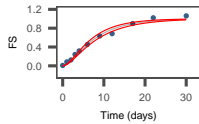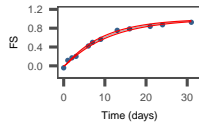

DHSO - TLNVKPLVTHR\_3

DLDH - ADQPIEADTVIGSGPGGYVAAIK\_2

DLDH - RPFTQNLGLEELGIELDPK\_3

AA R2: 0.98 k: 0.292 dk: 0.0557

HW R2: 0.94 k: 0.111 dk: 0.0222

AA R2: 0.98 k: 0.132 dk: 0.0241

HW R2: 0.99 k: 0.125 dk: 0.0115

AA R2: 0.95 k: 0.183 dk: 0.0548

HW R2: 0.98 k: 0.11 dk: 0.0128

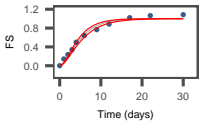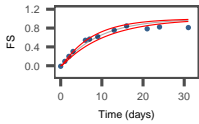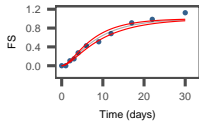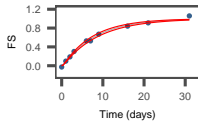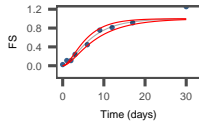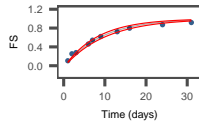

DHSO - VLVCGAGPVMWTLVAK\_2

DLDH - ALLNNSHYHMAHGK\_3

DNJA3 - DGADIHSDLFISIAQILGGTAK\_3

AA R2: 0.98 k: 0.284 dk: 0.051

HW R2: 0.99 k: 0.201 dk: 0.0144

AA R2: 1 k: 0.129 dk: 0.00714

HW R2: 0.92 k: 0.134 dk: 0.0314

AA R2: 0.94 k: 0.769 dk: 0.262

HW R2: 0.95 k: 0.512 dk: 0.1

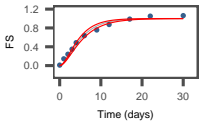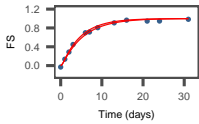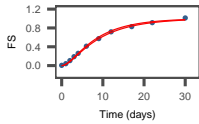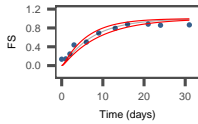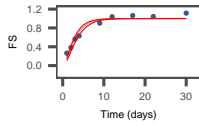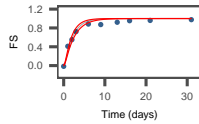

DHTK1 - YGGEAESMMGFFHELLK\_3

DLDH - ALTGGIAHLFK\_2

DOPD - KGTVMFTL\_2

AA R2: 0.96 k: 0.128 dk: 0.0306

HW R2: 0.99 k: 0.103 dk: 0.0129

AA R2: 0.99 k: 0.13 dk: 0.0112

HW R2: 0.96 k: 0.0791 dk: 0.0141

AA R2: 0.98 k: 0.202 dk: 0.0275

HW R2: 0.93 k: 0.216 dk: 0.0708

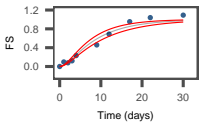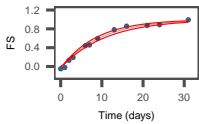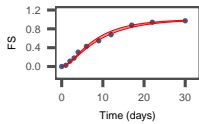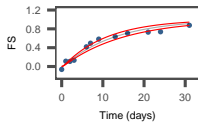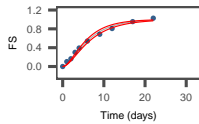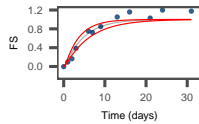

DHX9 - ETPFELIEALKK\_2

DLDH - ALTGGIAHLFK\_3

DOPD - LCAATATILDKPEDR\_2

AA R2: 0.97 k: 0.382 dk: 0.07

HW R2: 0.99 k: 0.392 dk: 0.0432

AA R2: 0.98 k: 0.15 dk: 0.0205

HW R2: 0.98 k: 0.0996 dk: 0.012

AA R2: 0.97 k: 0.197 dk: 0.0388

HW R2: 0.99 k: 0.167 dk: 0.0145

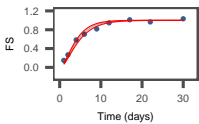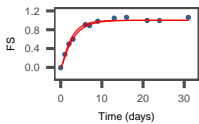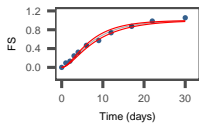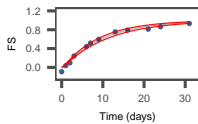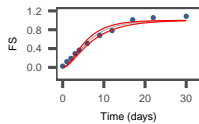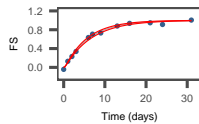

DIC - VHLTQEQVK\_2

DLDH - IPNIYAIGDVVAGPMLAHK\_3

DOPD - LCAATATILDKPEDR\_3

AA R2: 0.99 k: 0.236 dk: 0.0239

HW R2: 0.99 k: 0.215 dk: 0.0234

AA R2: 0.99 k: 0.125 dk: 0.0107

HW R2: 0.99 k: 0.107 dk: 0.00968

AA R2: 0.98 k: 0.197 dk: 0.032

HW R2: 0.99 k: 0.15 dk: 0.0155

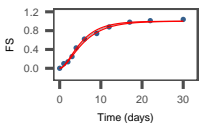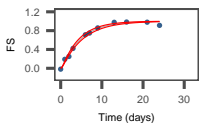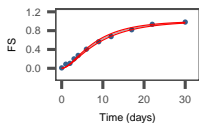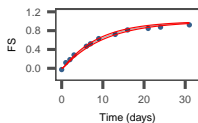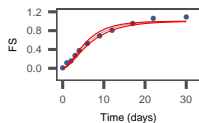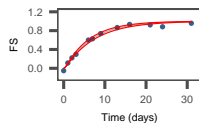

DPYD - DFLPLVAK\_2

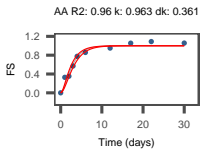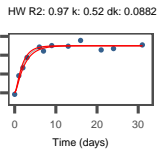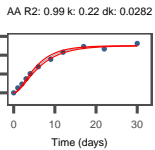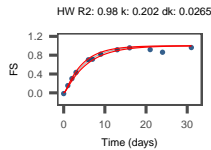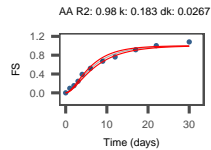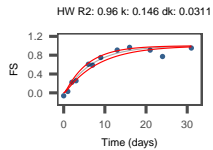

DPYS - DQTCTPVVK\_2

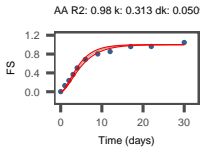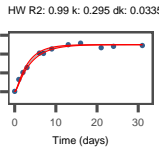

ECH1 - HVLHVQLNRPEK\_4

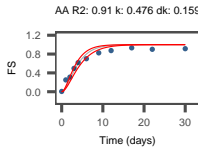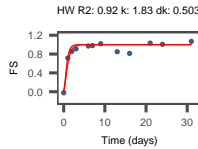

ECHA - FVDLYGAQK\_2

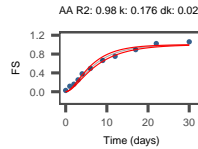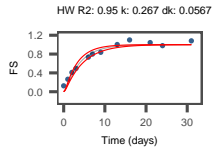

DPYS - MGSQSVDDFYQGTK\_2

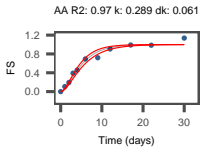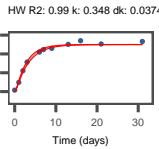

ECHA - ADMVIEAVFEDLGVK\_2

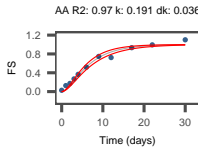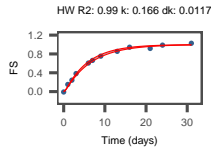

ECHA - GLYPAPLK\_2

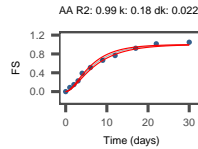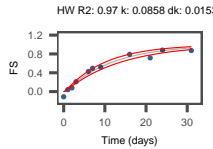

DPYS - VVYEAGVFNVTAGHGK\_2

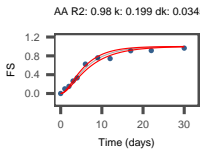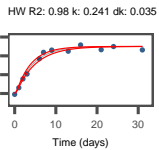

ECHA - ADMVIEAVFEDLGVK\_3

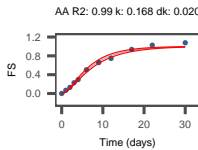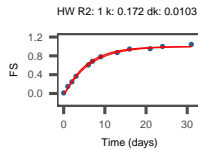

ECHA - ILQEGVDPK\_2

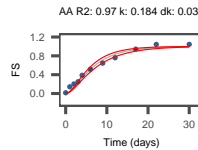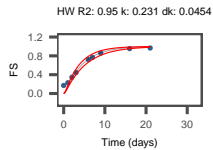

DPYS - VVYEAGVFNVTAGHGK\_3

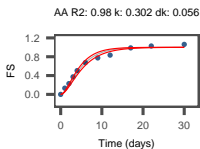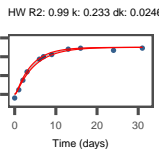

ECHA - AGLEQSGDAGYLAESQK\_2

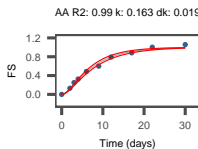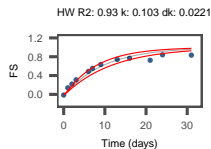

ECHA - KYESAYGTQTFPC\_2

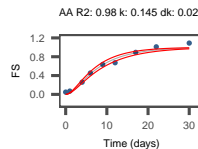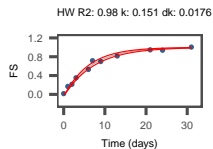

DX39A(Non-Unique) - DFLKPELLR\_3

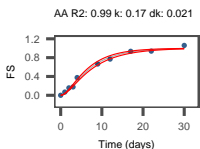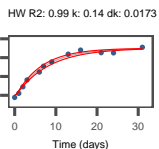

ECHA - DSIFSNLIGQLDYK\_3

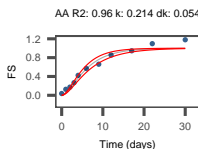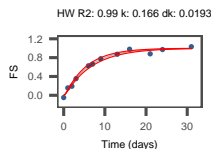

ECHA - LPAPKEVSSDEDVQYR\_2

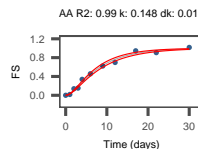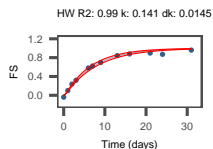

ECHA – MGLVDQLVEPLGPIK\_2

ECHA – TIEYLEAVNFAK\_3

ECHD3 – VIISAEGPVFSSGHDLK\_3

AA R2: 0.99 k: 0.168 dk: 0.0219

HW R2: 0.93 k: 0.175 dk: 0.0334

AA R2: 0.98 k: 0.0937 dk: 0.0136

HW R2: 0.98 k: 0.195 dk: 0.027

AA R2: 0.98 k: 0.197 dk: 0.0297

HW R2: 0.97 k: 0.144 dk: 0.0225

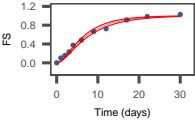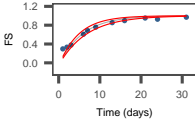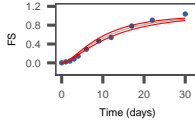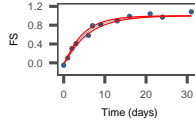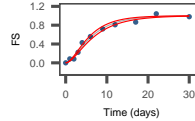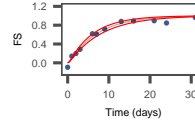

ECHA – MGLVDQLVEPLGPIK\_3

ECHA – VIGMHYFSPVDK\_2

ECHM – IVVAMAK\_2

AA R2: 0.97 k: 0.162 dk: 0.028

HW R2: 1 k: 0.153 dk: 0.00955

AA R2: 0.98 k: 0.172 dk: 0.0227

HW R2: 0.98 k: 0.105 dk: 0.015

AA R2: 0.99 k: 0.137 dk: 0.0126

HW R2: 0.94 k: 0.0725 dk: 0.0144

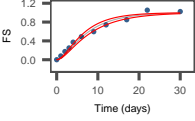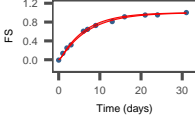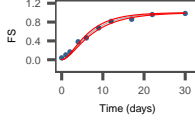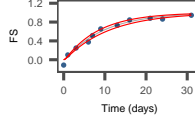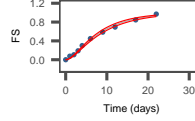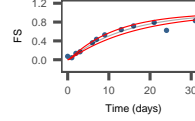

ECHA – MQLLEIITDK\_2

ECHB – DFIVSQDPK\_2

ECHM – LVIEAIQCAEK\_2

AA R2: 0.98 k: 0.144 dk: 0.0204

HW R2: 0.99 k: 0.171 dk: 0.0135

AA R2: 0.97 k: 0.166 dk: 0.0265

HW R2: 0.99 k: 0.18 dk: 0.0188

AA R2: 0.95 k: 0.166 dk: 0.0386

HW R2: 0.95 k: 0.15 dk: 0.0268

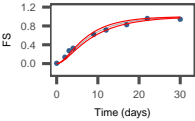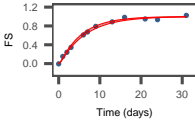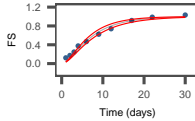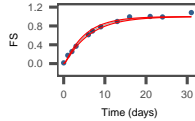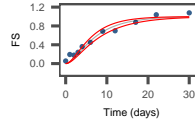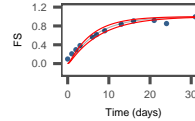

ECHA – NVQQLAILGAGLMGAGIAQVSDK\_2

ECHB – DQLLLGPTYATPK\_2

ECHM – TFQDCYSK\_2

AA R2: 0.98 k: 0.188 dk: 0.034

HW R2: 0.91 k: 0.1 dk: 0.0309

AA R2: 0.99 k: 0.168 dk: 0.0217

HW R2: 1 k: 0.138 dk: 0.00757

AA R2: 0.99 k: 0.133 dk: 0.0131

HW R2: 1 k: 0.126 dk: 0.00596

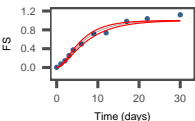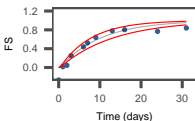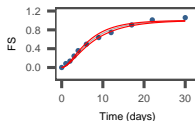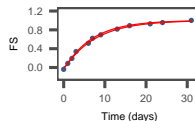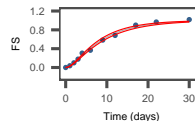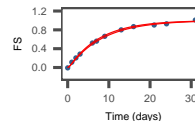

ECHA – NVQQLAILGAGLMGAGIAQVSDK\_3

ECHB – DVVDYIIFGTIVQEVK\_3

ECHP – ELSSVDLVIEAVFEDMNLK\_2

AA R2: 0.94 k: 0.16 dk: 0.051

HW R2: 0.99 k: 0.146 dk: 0.0147

AA R2: 0.98 k: 0.148 dk: 0.023

HW R2: 0.96 k: 0.148 dk: 0.0299

AA R2: 0.96 k: 0.605 dk: 0.167

HW R2: 0.98 k: 0.28 dk: 0.0375

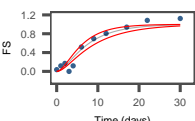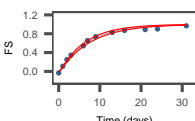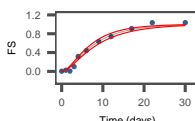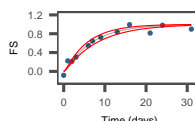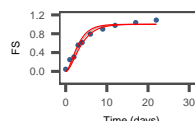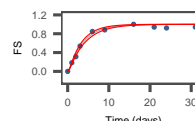

ECHA – QLLLDHANNSSK\_2

ECHB – MMLDLNK\_2

ECHP – EWQSLAGPHSSK\_3

AA R2: 0.99 k: 0.14 dk: 0.0173

HW R2: 0.96 k: 0.174 dk: 0.0306

AA R2: 0.97 k: 0.143 dk: 0.0242

HW R2: 0.97 k: 0.109 dk: 0.02

AA R2: 0.99 k: 0.396 dk: 0.0628

HW R2: 0.96 k: 0.253 dk: 0.052

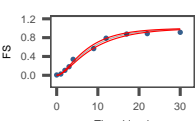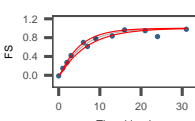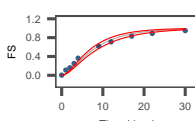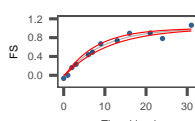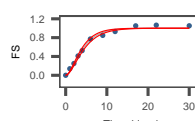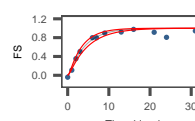



EF1G – EYFSWEGTFQHVGK\_3

EF2 – ETVSEESNVLCLSK\_2

EF2 – WLPAGDALQMQITHLPSVTAQK\_3

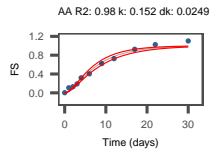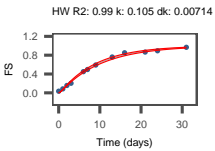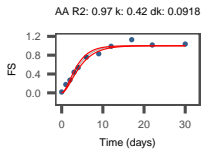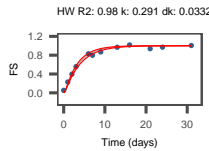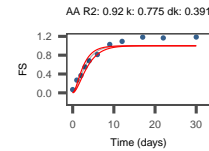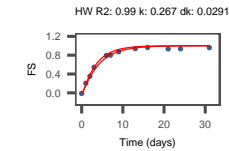

EF1G – ILGLLDTHLK\_2

EF2 – GHVFESQVAGTGMFVVK\_3

EFTU – DLDKPELLPVESVYSIPGR\_3

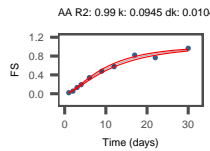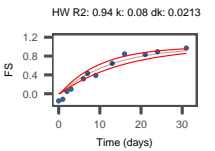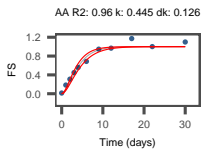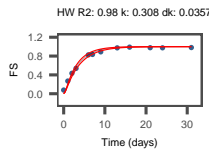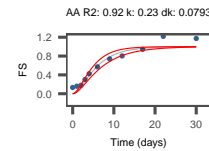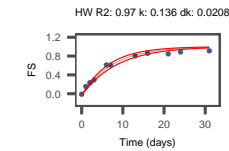

EF1G – ILGLLDTHLK\_3

EF2 – IWCFPGDGTGNILTDITK\_2

EFTU – GLVMVKPGSIQPH\_2

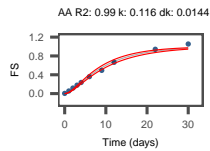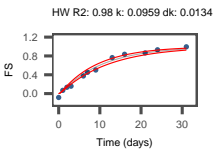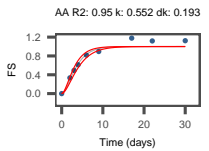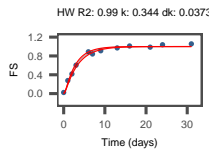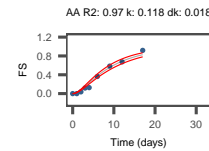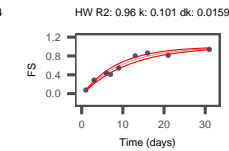

EF1G – STFVLDEFKR\_3

EF2 – NMSVIAHVDHGK\_3

EFTU – HYAHTDCPGHADVVK\_2

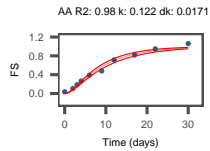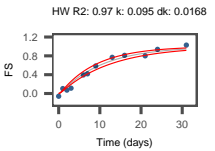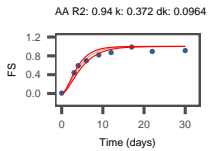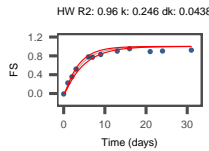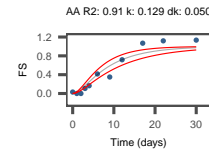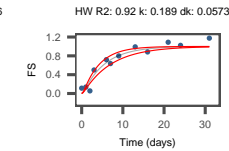

EF1G – YSNEDTLVALPYWEHFDK\_3

EF2 – STAISLFYELSENDLNFIK\_2

EFTU – HYAHTDCPGHADVVK\_3

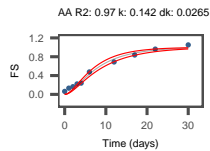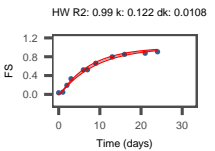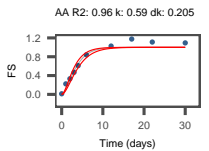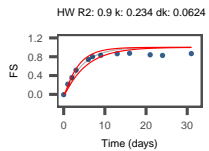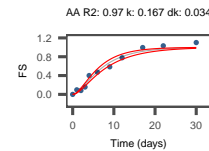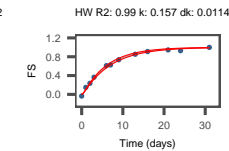

EF2 – EGIPALDNFLDKL\_2

EF2 – VFSGVVSTGLK\_2

EFTU – HYAHTDCPGHADVVK\_4

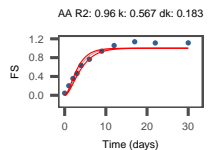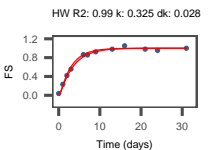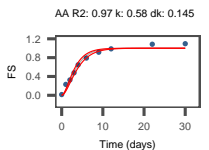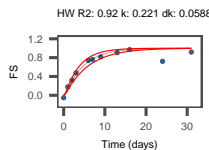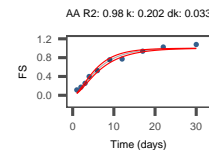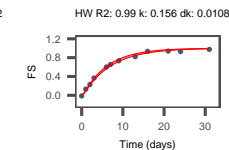





**EST1 - ESYFPLPTVIDGVLLPK\_2**

**EST1D - DKEVSWFAELR\_3**

**EST1D - TANSLLWK\_2**

AA R2: 0.98 k: 0.229 dk: 0.0372

HW R2: 0.97 k: 0.199 dk: 0.0363

AA R2: 0.99 k: 0.321 dk: 0.0405

HW R2: 0.99 k: 0.256 dk: 0.0341

AA R2: 0.98 k: 0.424 dk: 0.0749

HW R2: 0.95 k: 0.211 dk: 0.0426

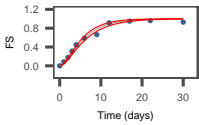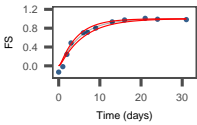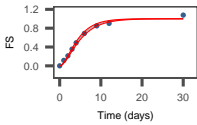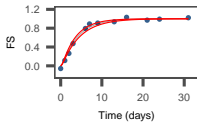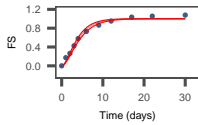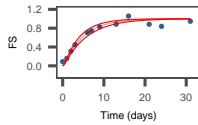

**EST1 - HPSPVVTHTVHGK\_4**

**EST1D - ENIPLQFSEDCLYNIYTPADLTK\_3**

**EST1E(Non-Unique) - FAPPQPAEPWSSVK\_2**

AA R2: 0.98 k: 0.386 dk: 0.0772

HW R2: 0.91 k: 0.175 dk: 0.0424

AA R2: 0.9 k: 0.683 dk: 0.369

HW R2: 0.99 k: 0.25 dk: 0.0231

AA R2: 0.97 k: 0.469 dk: 0.118

HW R2: 0.98 k: 0.256 dk: 0.0356

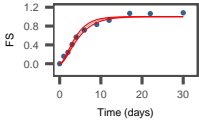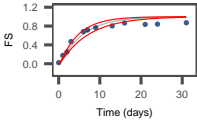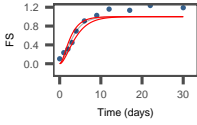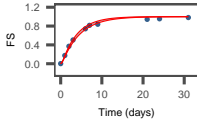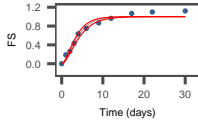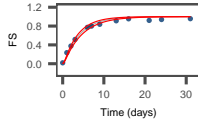

**EST1C(Non-Unique) - EVAFWTELLAK\_2**

**EST1D - ESYFPLPTVIDGVVLPK\_2**

**EST1F - GNPSSPPVDTAHGK\_2**

AA R2: 0.97 k: 0.767 dk: 0.199

HW R2: 0.96 k: 0.73 dk: 0.145

AA R2: 0.97 k: 0.411 dk: 0.0964

HW R2: 0.91 k: 0.261 dk: 0.0712

AA R2: 0.98 k: 0.362 dk: 0.064

HW R2: 0.95 k: 0.196 dk: 0.0407

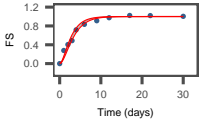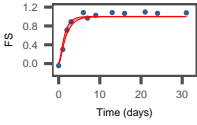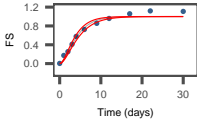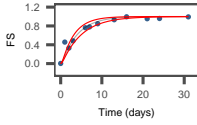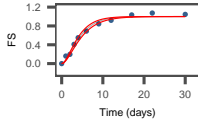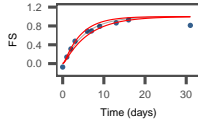

**EST1C(Non-Unique) - FAPPQPAEPWSFVK\_2**

**EST1D - ISENMIPVVAEK\_2**

**EST1F - LPVMVWHGGGLK\_3**

AA R2: 0.96 k: 0.466 dk: 0.125

HW R2: 0.96 k: 0.245 dk: 0.044

AA R2: 0.98 k: 0.39 dk: 0.0756

HW R2: 0.97 k: 0.202 dk: 0.0328

AA R2: 0.98 k: 0.407 dk: 0.0779

HW R2: 0.95 k: 0.159 dk: 0.0344

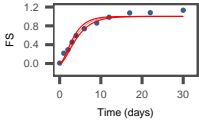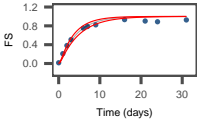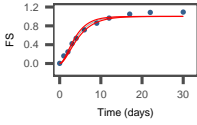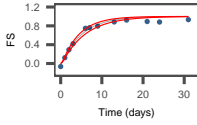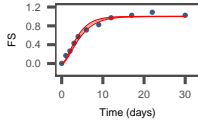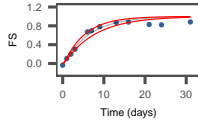

**EST1D - AVIGDHGDEIFSVFGSPFLK\_3**

**EST1D - QEFGWIPTLMGYPLAEGK\_3**

**EST2A - QEILAINQVKF\_2**

AA R2: 0.96 k: 0.491 dk: 0.136

HW R2: 0.97 k: 0.193 dk: 0.0334

AA R2: 0.97 k: 0.384 dk: 0.0832

HW R2: 0.99 k: 0.246 dk: 0.0213

AA R2: 0.99 k: 0.251 dk: 0.03

HW R2: 0.94 k: 0.34 dk: 0.0957

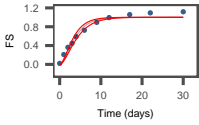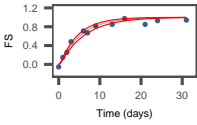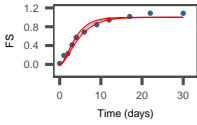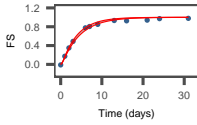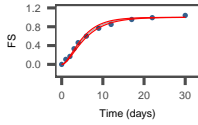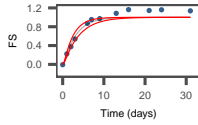

**EST1D - DGASEEETNLSK\_2**

**EST1D - SFSTVPYIVGINK\_2**

**EST2C - ADHADEIPVFAFFWGMK\_3**

AA R2: 0.98 k: 0.36 dk: 0.0732

HW R2: 0.97 k: 0.329 dk: 0.049

AA R2: 0.98 k: 0.408 dk: 0.0696

HW R2: 0.95 k: 0.16 dk: 0.0295

AA R2: 0.93 k: 0.448 dk: 0.166

HW R2: 0.95 k: 0.18 dk: 0.0432

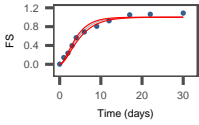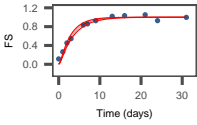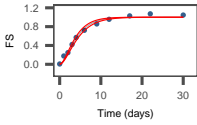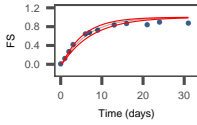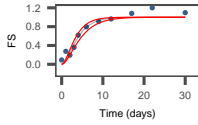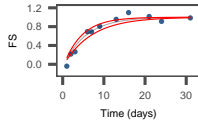

EST2E – HPQELMASK\_2

EST3B – DASINPPMQLDVEK\_2

ETFA – APSSSSVGISEWLDQK\_2

AA R2: 0.96 k: 0.225 dk: 0.0456

HW R2: 0.96 k: 0.226 dk: 0.0403

AA R2: 0.99 k: 0.212 dk: 0.0329

HW R2: 0.91 k: 0.184 dk: 0.0511

AA R2: 0.96 k: 0.173 dk: 0.044

HW R2: 0.99 k: 0.122 dk: 0.0124

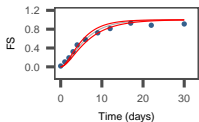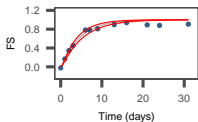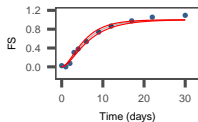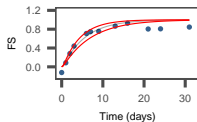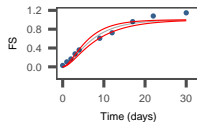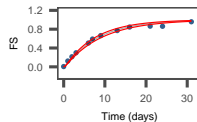

EST3A – AISQSGVVISK\_2

ESTD – AFSGYLGPDESK\_2

ETFA – GLLPEELTPLILETQK\_2

AA R2: 0.98 k: 0.43 dk: 0.0853

HW R2: 0.98 k: 0.288 dk: 0.039

AA R2: 0.96 k: 0.0324 dk: 0.00371

HW R2: 1 k: 0.199 dk: 0.00978

AA R2: 0.99 k: 0.138 dk: 0.0134

HW R2: 0.94 k: 0.164 dk: 0.0399

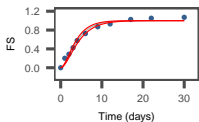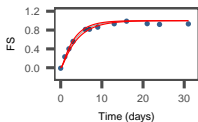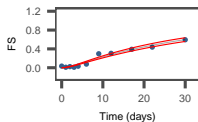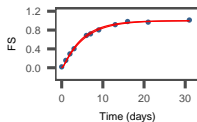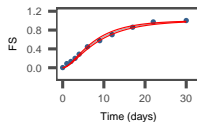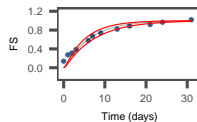

EST3A(Non-Unique) – FWNLDK\_2

ESTD – AYDATCLVK\_2

ETFA – GLLPEELTPLILETQK\_3

AA R2: 0.97 k: 0.496 dk: 0.113

HW R2: 0.97 k: 0.364 dk: 0.0603

AA R2: 0.97 k: 0.224 dk: 0.0415

HW R2: 0.96 k: 0.244 dk: 0.0535

AA R2: 0.98 k: 0.128 dk: 0.019

HW R2: 1 k: 0.135 dk: 0.00894

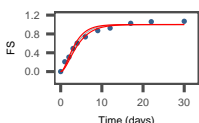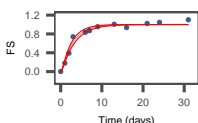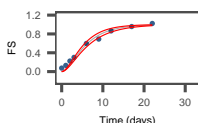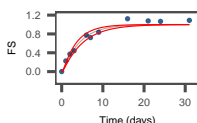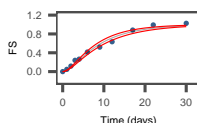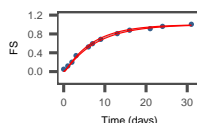

EST3A(Non-Unique) – LGIFGLSTGDK\_2

ESTD – CPALYWLSGLTCTEQNFISK\_2

ETFA – GTSFEAAATSGGSASSEK\_2

AA R2: 0.98 k: 0.426 dk: 0.0862

HW R2: 0.98 k: 0.371 dk: 0.0468

AA R2: 0.96 k: 0.283 dk: 0.0631

HW R2: 0.99 k: 0.172 dk: 0.0192

AA R2: 0.99 k: 0.13 dk: 0.0142

HW R2: 0.99 k: 0.126 dk: 0.0129

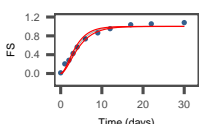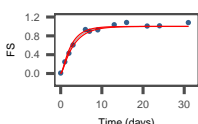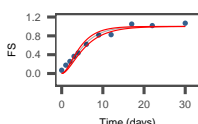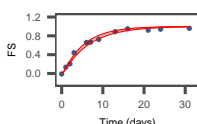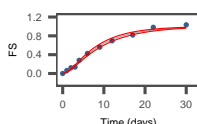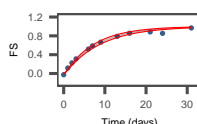

EST3A(Non-Unique) – QPFTVPYLLGVTNHEFGWLLLK\_3

ESTD – CPALYWLSGLTCTEQNFISK\_3

ETFA – IVAPELYAVGISGAIQLAGMK\_3

AA R2: 0.98 k: 0.438 dk: 0.0862

HW R2: 0.99 k: 0.301 dk: 0.0224

AA R2: 0.94 k: 0.312 dk: 0.104

HW R2: 0.99 k: 0.175 dk: 0.0134

AA R2: 0.98 k: 0.144 dk: 0.0244

HW R2: 0.99 k: 0.111 dk: 0.00946

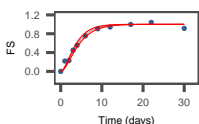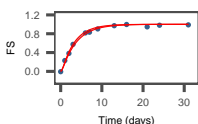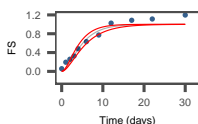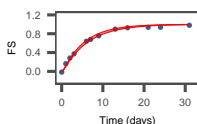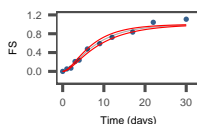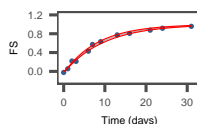

EST3A – YALQELGDITLVIPTLFSK\_3

ESTD – SVSAPAFICNPVLCSWGK\_2

ETFA – LNVAPVSDIIEIK\_2

AA R2: 0.94 k: 0.722 dk: 0.266

HW R2: 1 k: 0.346 dk: 0.024

AA R2: 0.94 k: 0.323 dk: 0.097

HW R2: 0.95 k: 0.139 dk: 0.0257

AA R2: 0.98 k: 0.142 dk: 0.0197

HW R2: 1 k: 0.126 dk: 0.00806

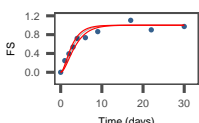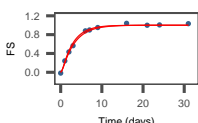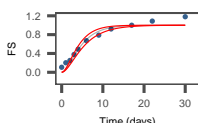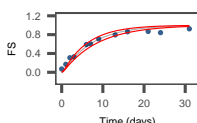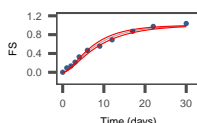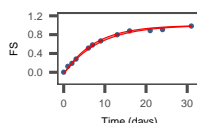

**ETFA - QFSYTHICAGASAFGK\_2**

**ETFA - VVPEMTEILK\_2**

**ETFD - ASCDAQTYGIGLK\_2**

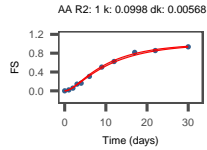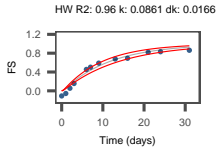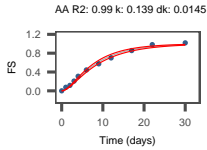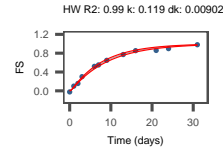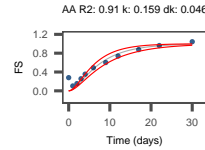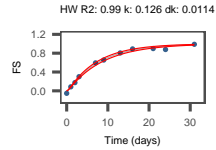

**ETFA - SDRPELTGAK\_2**

**ETFB - LKLPAVVTADLR\_3**

**ETFD - ELFPDWK\_2**

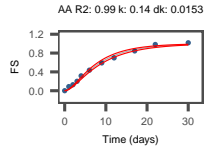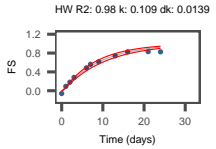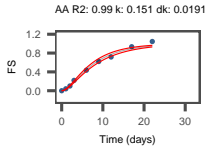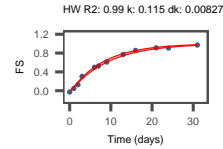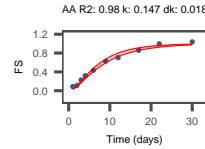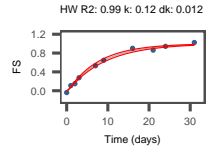

**ETFA - SDRPELTGAK\_3**

**ETFB - VDLLFLGK\_2**

**ETFD - ELWIDEK\_2**

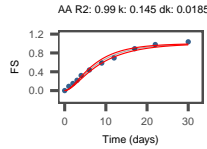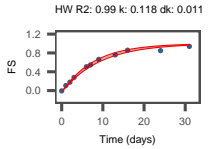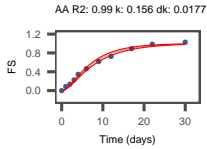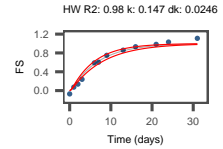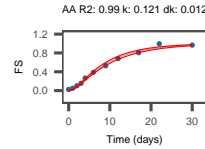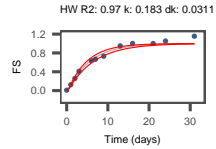

**ETFA - TIYAGNALCTVK\_2**

**ETFD - AAQIGAHTLSGACLDPAAFK\_2**

**ETFD - FAILTEK\_2**

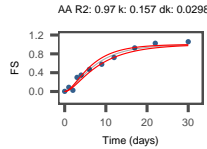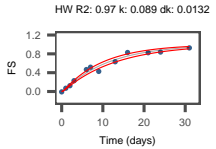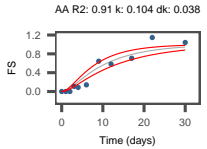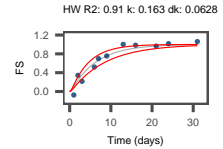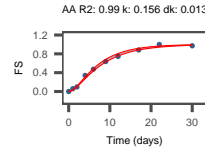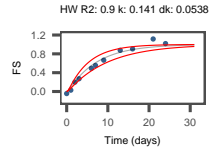

**ETFA - VLVQAHDAYK\_2**

**ETFD - AAQIGAHTLSGACLDPAAFK\_3**

**ETFD - LTFPGGLIGCSPGMNVPK\_2**

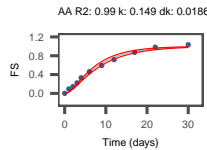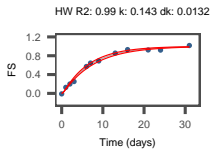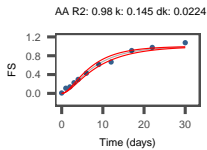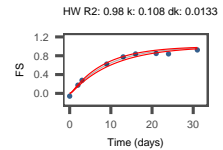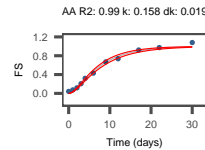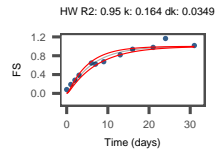

**ETFA - VLVQAHDAYK\_3**

**ETFD - ALNEGGLSQIPK\_2**

**ETFD - TTGLHVTEYEDNLK\_2**

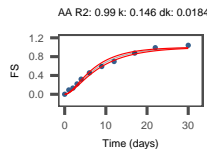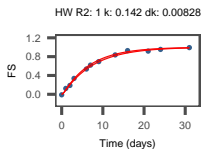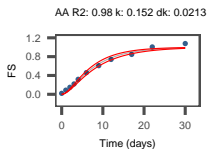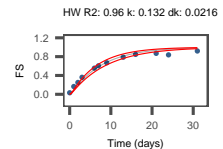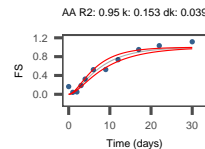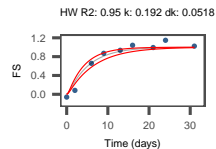

F16P1 - AQGTGELTQLLNSLCTAIK\_3

F16P1 - STDEPSEKDALQPGR\_3

FAAA - IGVAIGDQLDLDSVIK\_2

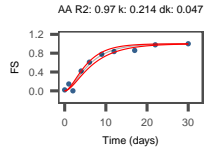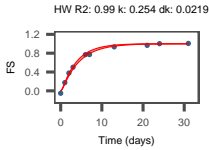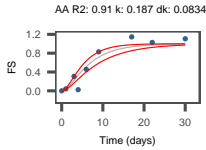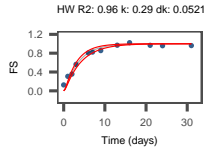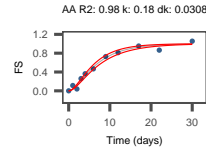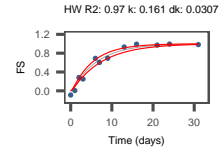

F16P1 - DILDIVPTEIHKQ\_3

F16P1 - TLVYGGIFLYPANK\_2

FAAA - M[15.9949]RPDNSKPPVYGACR\_3

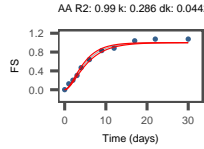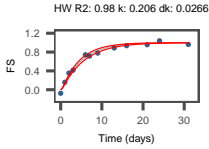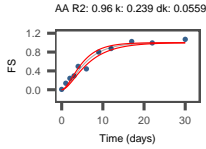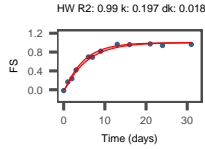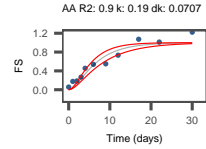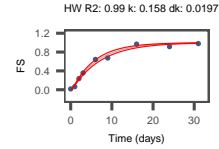

F16P1 - GNIYSLNEGYAK\_2

FAAA - DIQWEYVPLGPFLGK\_2

FAAA - MRPDNSKPPVYGACR\_4

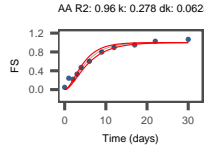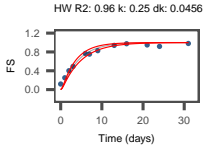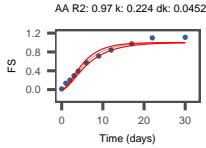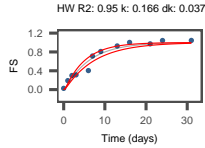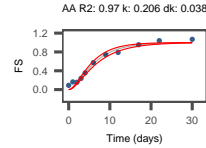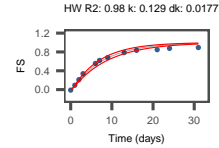

F16P1 - LDILSNDLVINMLK\_3

FAAA - DIQWEYVPLGPFLGK\_3

FAAA - PGDLLASGTISGSDPESFGSMLELSWK\_2

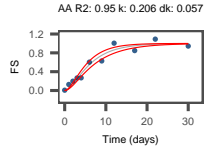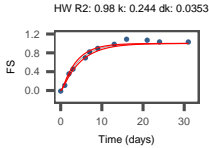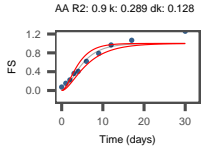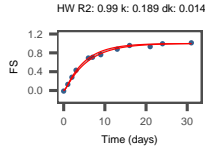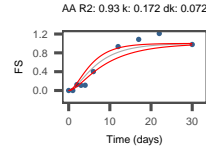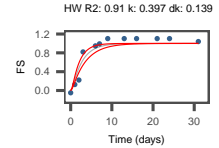

F16P1 - LLYECNPIAYVMEK\_2

FAAA - HLFTGPALSK\_2

FABPI - EVSGNELIQTYTYEGVEAK\_2

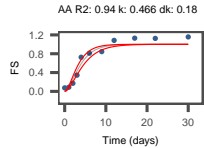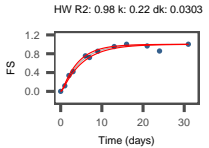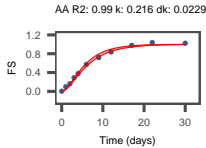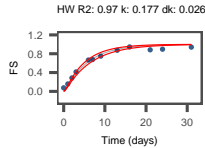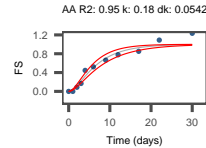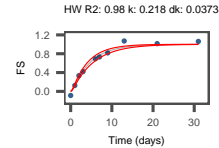

F16P1 - QAGIAQLYGIAGSTNVTGDQVK\_2

FAAA - HQHFVDETLNLFMGLGQAAWK\_2

FABPI - LTTIQDGNK\_2

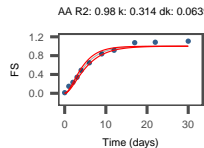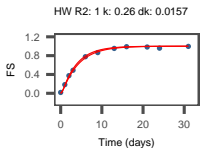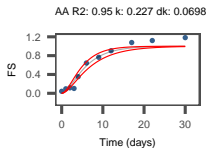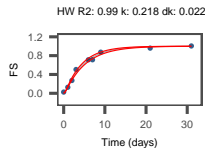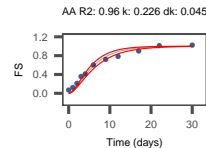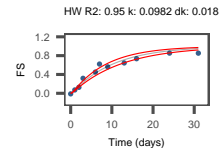

FABPL – AIGLPEDLIQK\_2

FAHD1 – ITLEEGDLLTGTPK\_2

FAS – LDPGSPQLQVLK\_2

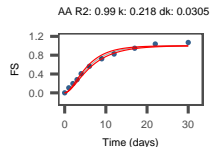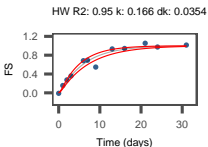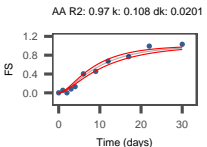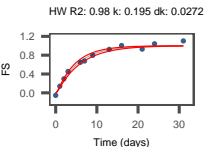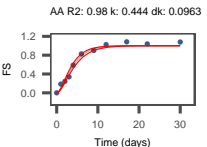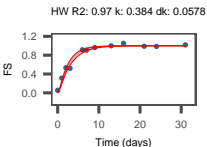

FABPL – GVSEIVHEGK\_2

FAHD1 – NLHHEVELGVLLGK\_3

FAS – LKEDTQADVTTSR\_2

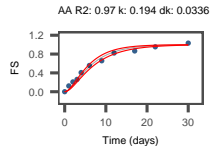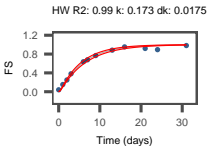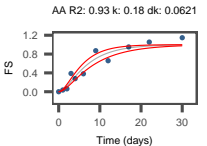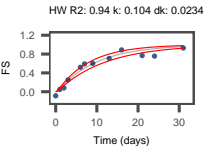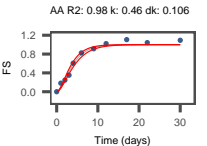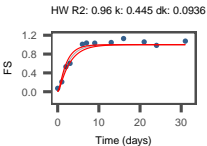

FABPL – GVSEIVHEGK\_3

FAS – DNLEFFLTNLGK\_2

FAS – LKEDTQADVTTSR\_3

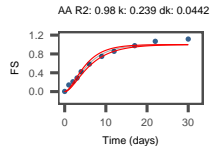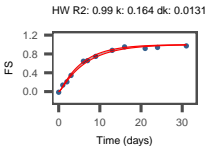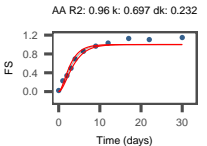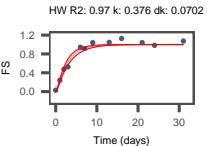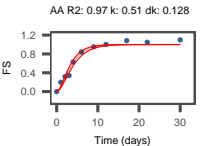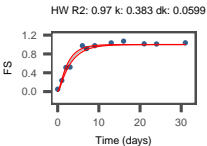

FABPL – LTITYGPK\_2

FAS – EGGFLLVHTVLK\_2

FAS – LLEASHAFVSDTGNLIVSGK\_3

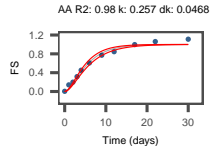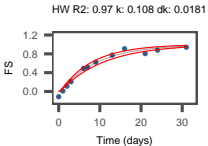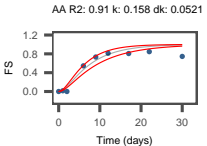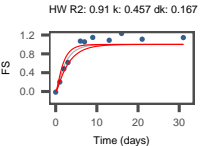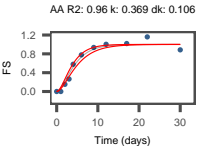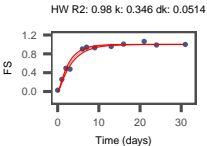

FABPL – NEFTLGECELETMTGK\_3

FAS – FDSAFFGVHPK\_3

FAS – LLLPEDLISGLLNSQALK\_2

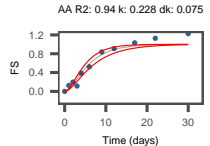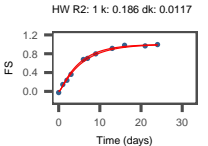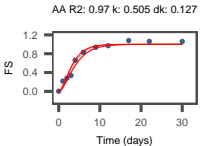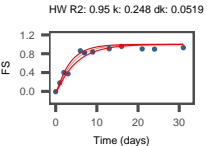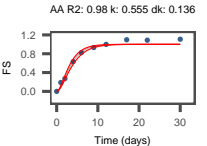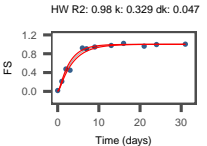

FABPL – YLQSQENFEFPM[15.9949]K\_2

FAS – GVDLVNLSAEK\_2

FAS – LLLPEDLISGLLNSQALK\_3

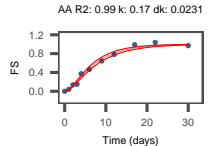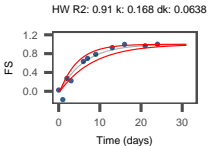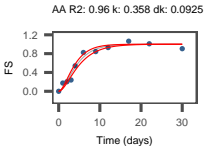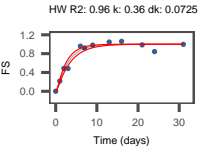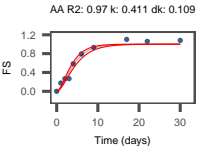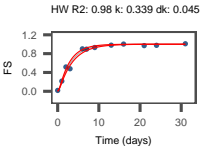

FAS - LSFFDFK\_2

FAS - VQEVQVSTNK\_2

FMO1 - WVQVLK\_2

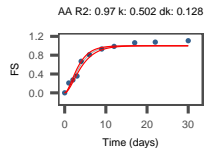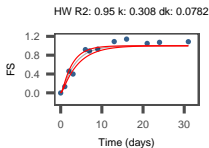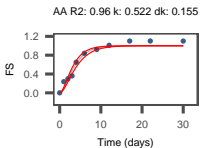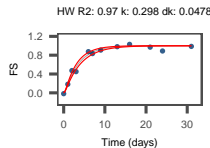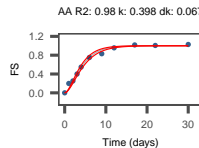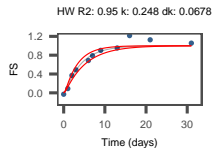

FAS - LTQGEVYK\_2

FGGY - AGHFFDLPDLSWK\_3

FMO5 - IAVIGAGASGLTCK\_2

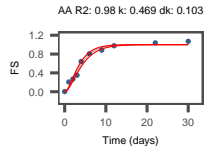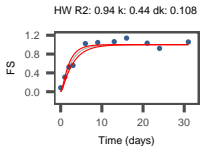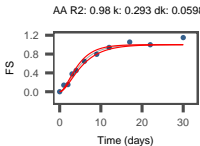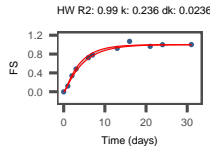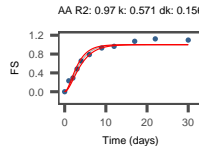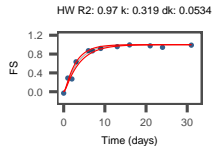

FAS - SNMGHPEPASGLAALT\_2

FIS1 - GIVLELLPK\_2

FMO5 - IIAGLVK\_2

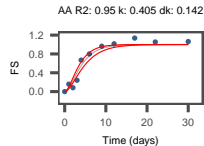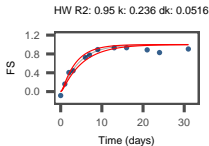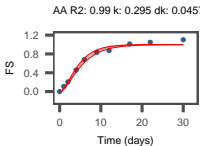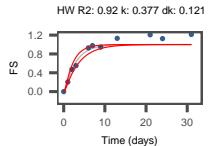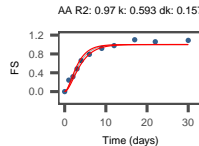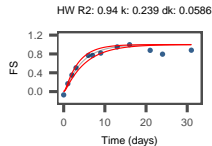

FAS - SNMGHPEPASGLAALT\_3

FLNB - AQITNPSGASTECFVK\_2

FMO5 - VIVIGINSGDGLAVEISHTAK\_3

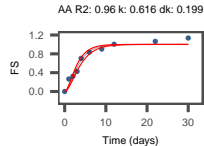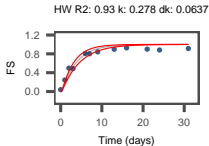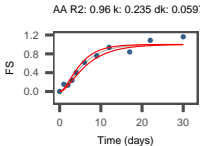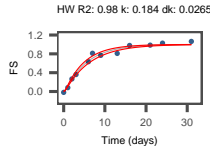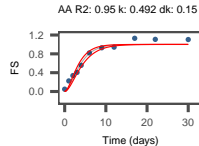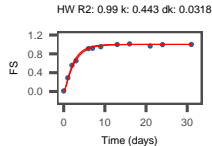

FAS - TGLAFHSYFMEGIAPTLLQALK\_3

FMO1 - ALQTDYIYIDLLTSINAK\_2

FPPS - ALYEALDLSAFFK\_2

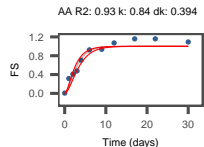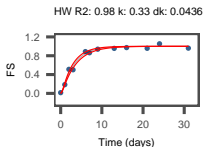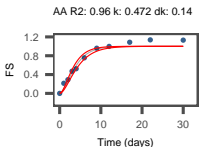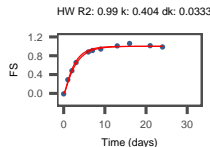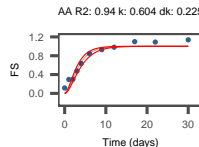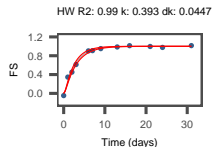

FAS - VLEALLPK\_2

FMO1 - ALQTDYIYIDLLTSINAK\_3

FPPS - ALYEALDLSAFFK\_3

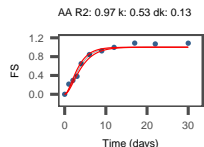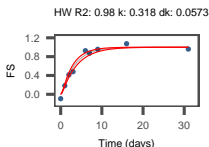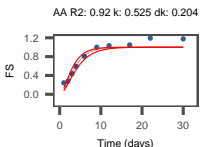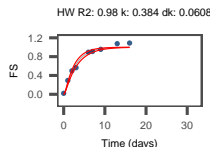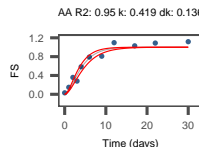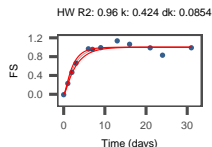

FPPS - GLTVVQAFQELVEPK\_2

FUMH - HIAAAVEVHK\_3

G3P(Non-Unique) - CLAPLAK\_2

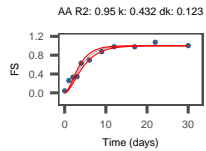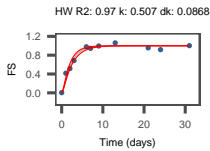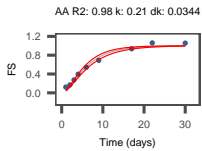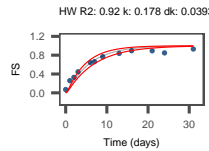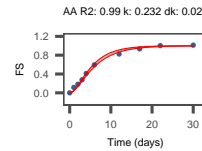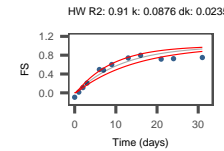

FTCD - AFAACLEAIK\_2

FUMH - MPIPVIQAFILK\_2

G3P - FQYDSTHGK\_2

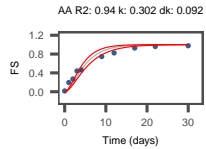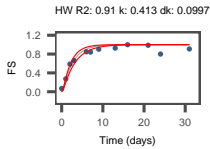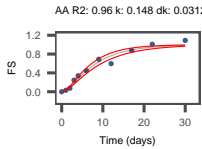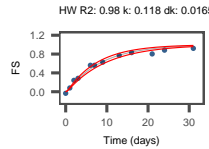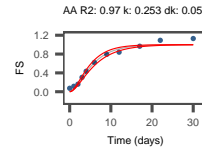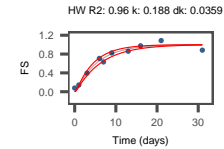

FTCD - EAQELNLPVGSQVLGLVPLK\_2

FUMH - VAALTGLPFVTAPNK\_2

G3P - FQYDSTHGK\_3

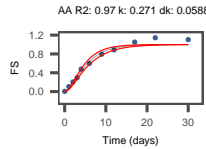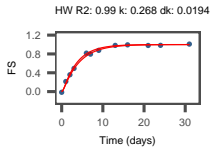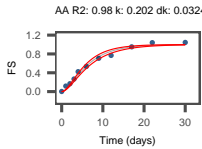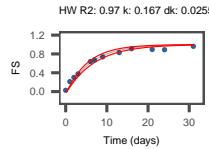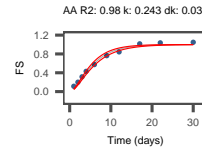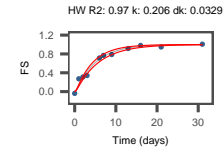

FTCD - EAQELNLPVGSQVLGLVPLK\_3

FUMH - VEFDTFGLK\_2

G3P - GAAQNIIPASTGAAK\_2

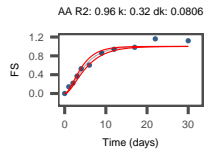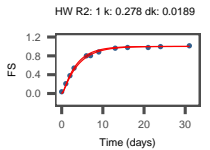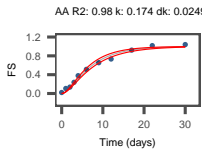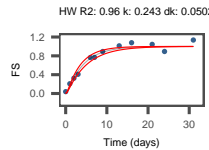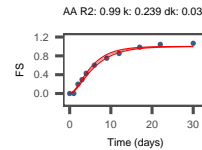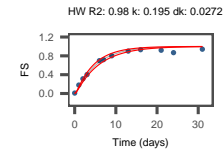

FTCD - GVSMEECVCAK\_2

FUMH - VLLPGLQK\_2

G3P - MFQYDSTHGK\_3

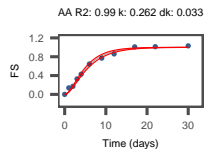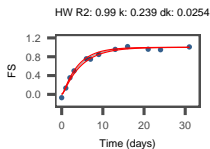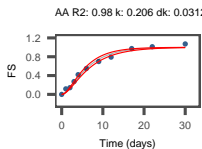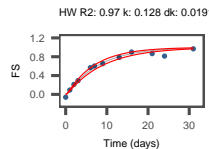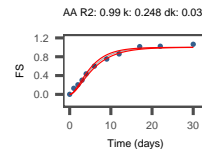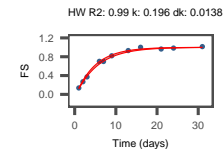

FUMH - AAAEVNQEYGLDPK\_2

FUS - APKPDGPGGGGPGSHMGNGYDDDR\_4

G3P - RVIISAPSADAMPFVMGVNHEK\_4

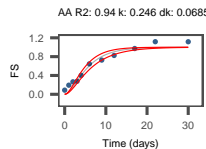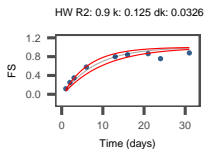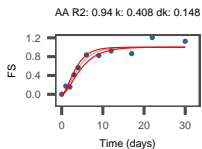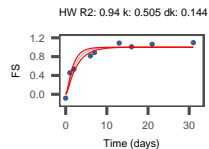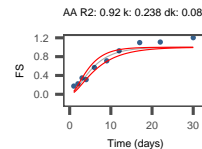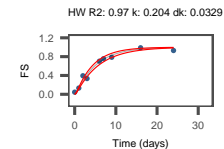



**G3P – TTVHAITATQK\_2**

**G6PE – QSPLITAWPEELISK\_2**

**G6PI – TLASLSPETSLFLIASK\_2**

AA R2: 0.94 k: 0.118 dk: 0.0354

HW R2: 0.94 k: 0.246 dk: 0.0639

AA R2: 0.94 k: 0.433 dk: 0.158

HW R2: 0.94 k: 0.327 dk: 0.0671

AA R2: 0.92 k: 0.216 dk: 0.0672

HW R2: 0.94 k: 0.142 dk: 0.0314

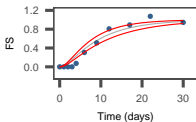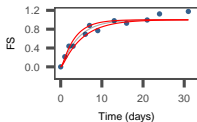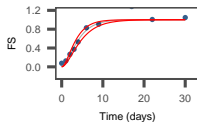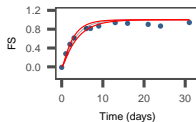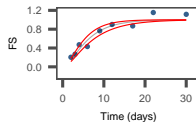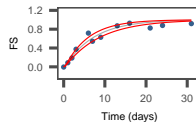

**G3P – VIHDNFGIVEGLMTTVHAITATQK\_3**

**G6PI – FAAYFQQGDMESNGK\_2**

**G6PI – VFEGNRPTNSIVFTK\_2**

AA R2: 0.93 k: 0.313 dk: 0.115

HW R2: 0.99 k: 0.195 dk: 0.0179

AA R2: 0.98 k: 0.213 dk: 0.0365

HW R2: 0.99 k: 0.205 dk: 0.0207

AA R2: 0.99 k: 0.18 dk: 0.0245

HW R2: 0.93 k: 0.16 dk: 0.0358

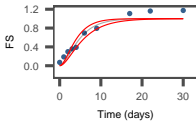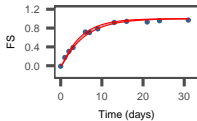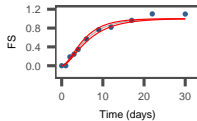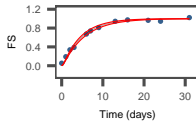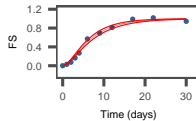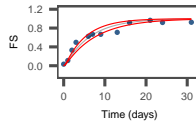

**G3P – VIISAPSADAPMFVMGVNHEK\_2**

**G6PI – ILGALIAMEYEHK\_3**

**GABT – NLLAEVINIUK\_2**

AA R2: 0.98 k: 0.281 dk: 0.0476

HW R2: 0.99 k: 0.202 dk: 0.0225

AA R2: 0.96 k: 0.172 dk: 0.0416

HW R2: 0.95 k: 0.317 dk: 0.0697

AA R2: 0.98 k: 0.227 dk: 0.0368

HW R2: 0.99 k: 0.172 dk: 0.018

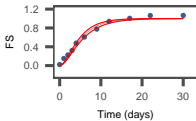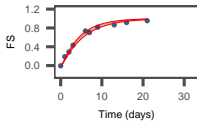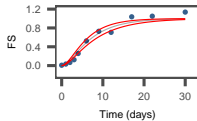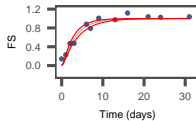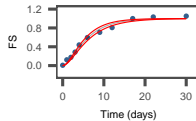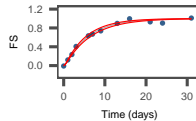

**G3P – VIISAPSADAPMFVMGVNHEK\_3**

**G6PI – ILLANFLAQTEALMK\_2**

**GADL1(Non-Unique) – ADSVAWNPHK\_3**

AA R2: 0.98 k: 0.289 dk: 0.0517

HW R2: 0.99 k: 0.169 dk: 0.0152

AA R2: 0.97 k: 0.256 dk: 0.0541

HW R2: 1 k: 0.197 dk: 0.012

AA R2: 0.95 k: 0.465 dk: 0.142

HW R2: 0.95 k: 0.209 dk: 0.0392

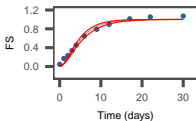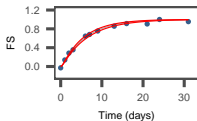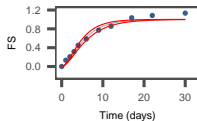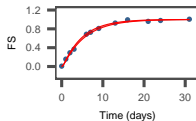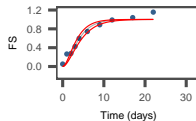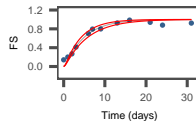

**G3P – VIPELNGK\_2**

**G6PI – SITDIINIGGGSDGLPLMVTEALKPY\_2**

**GAL3A – ITSLAQLNAANHDAIIFGGFGAAK\_3**

AA R2: 0.99 k: 0.229 dk: 0.0246

HW R2: 0.91 k: 0.0945 dk: 0.0352

AA R2: 0.97 k: 0.28 dk: 0.0596

HW R2: 0.96 k: 0.195 dk: 0.042

AA R2: 0.98 k: 0.168 dk: 0.0239

HW R2: 0.97 k: 0.118 dk: 0.0174

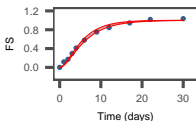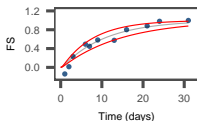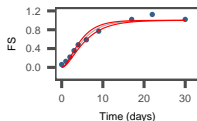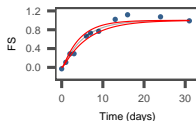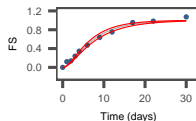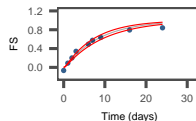

**G6PC1 – WCERPEWHLDTTPFASLFK\_4**

**G6PI – SITDIINIGGGSDGLPLMVTEALKPY\_3**

**GALK1 – TDGLVLLTTSK\_2**

AA R2: 0.93 k: 0.438 dk: 0.157

HW R2: 0.93 k: 0.374 dk: 0.0891

AA R2: 0.96 k: 0.36 dk: 0.0936

HW R2: 0.99 k: 0.171 dk: 0.0172

AA R2: 0.99 k: 0.289 dk: 0.0378

HW R2: 0.96 k: 0.17 dk: 0.0362

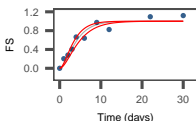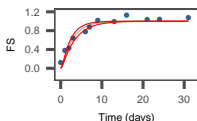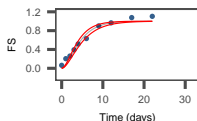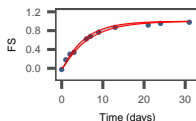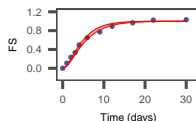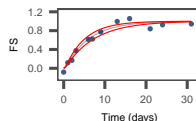

**GALM – ILEVYTPQGVQFYTNFLDGLTK\_3**

**GCKR – ILLETLLLAAHK\_3**

**GLNA – ACLYAGVK\_2**

AA R2: 0.95 k: 0.157 dk: 0.0344

HW R2: 0.97 k: 0.106 dk: 0.017

AA R2: 0.96 k: 0.183 dk: 0.0441

HW R2: 0.96 k: 0.157 dk: 0.0243

AA R2: 0.94 k: 0.525 dk: 0.163

HW R2: 0.98 k: 0.229 dk: 0.0317

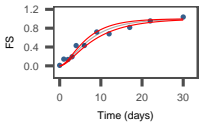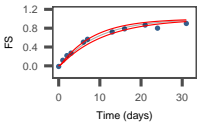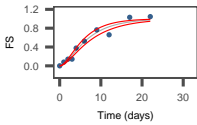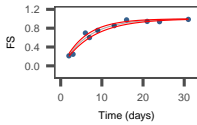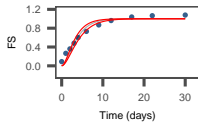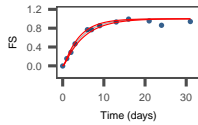

**GAMT – TGGVLTYCNLTWSGELMK\_2**

**GCSH – SCYEDGWLIK\_2**

**GLNA – LVLCEVFK\_2**

AA R2: 0.98 k: 3.75 dk: 2.01

HW R2: 0.93 k: 0.666 dk: 0.149

AA R2: 0.98 k: 0.156 dk: 0.0232

HW R2: 0.97 k: 0.178 dk: 0.0272

AA R2: 0.98 k: 0.284 dk: 0.0424

HW R2: 0.97 k: 0.258 dk: 0.0615

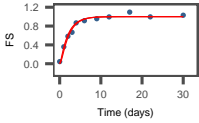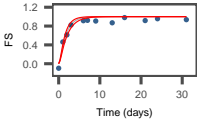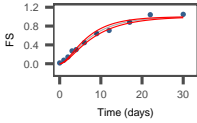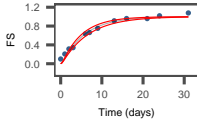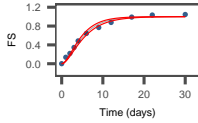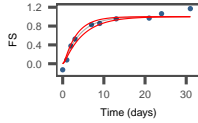

**GBB2 – LLLAGYDDFNCNIWDAMK\_2**

**GDIB – FVSIIDLFPVK\_2**

**GLNA – QMYMSLPQGEK\_2**

AA R2: 0.94 k: 0.552 dk: 0.2

HW R2: 0.96 k: 0.382 dk: 0.0702

AA R2: 0.98 k: 0.445 dk: 0.0921

HW R2: 0.98 k: 0.329 dk: 0.0455

AA R2: 0.97 k: 0.242 dk: 0.0446

HW R2: 0.94 k: 0.219 dk: 0.0453

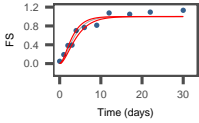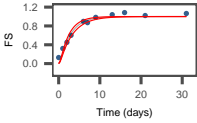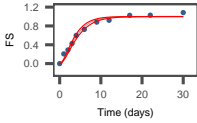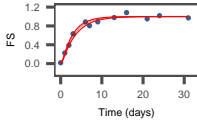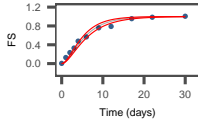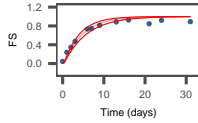

**GCDH – DIVYEMGELGVLGPTIK\_2**

**GDIB – VLHMQNPYYGGESASITPLEDLYK\_3**

**GLNA – TCLLNETGDEPFQYK\_2**

AA R2: 0.93 k: 0.101 dk: 0.0222

HW R2: 0.94 k: 0.126 dk: 0.0314

AA R2: 0.96 k: 0.228 dk: 0.0534

HW R2: 0.93 k: 0.205 dk: 0.054

AA R2: 0.98 k: 0.308 dk: 0.0597

HW R2: 0.99 k: 0.292 dk: 0.0304

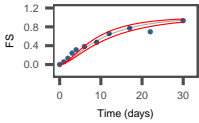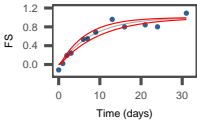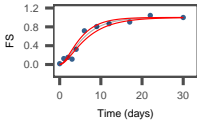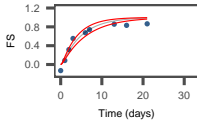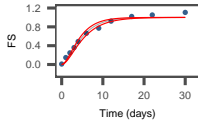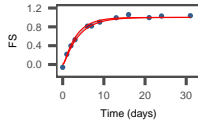

**GCDH – DIVYEMGELGVLGPTIK\_3**

**GDIB – VPSTAEALASSLMGLFEK\_3**

**GLNA – TCLLNETGDEPFQYKN\_2**

AA R2: 0.96 k: 0.322 dk: 0.081

HW R2: 0.94 k: 0.18 dk: 0.0349

AA R2: 0.97 k: 0.43 dk: 0.106

HW R2: 0.99 k: 0.326 dk: 0.0349

AA R2: 0.94 k: 0.264 dk: 0.097

HW R2: 0.95 k: 0.401 dk: 0.0968

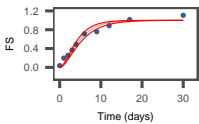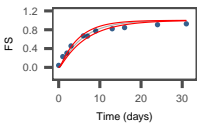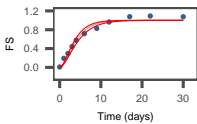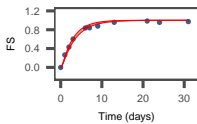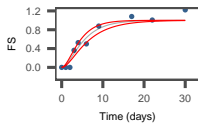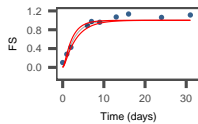

**GCDH – HNPSNQSYLSGTK\_2**

**GLGB – EFKDEDWNMGNIVYTLNR\_3**

**GLO2 – FYEGTADEMYK\_2**

AA R2: 0.97 k: 0.258 dk: 0.0568

HW R2: 0.96 k: 0.168 dk: 0.0277

AA R2: 0.96 k: 0.192 dk: 0.0438

HW R2: 0.97 k: 0.13 dk: 0.0217

AA R2: 0.97 k: 0.405 dk: 0.0942

HW R2: 0.97 k: 0.405 dk: 0.0732

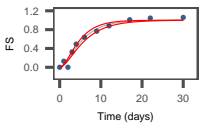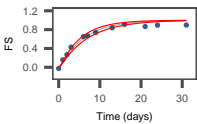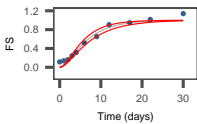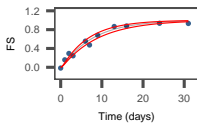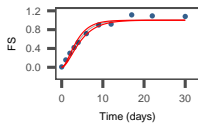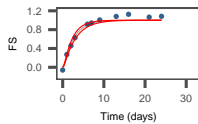

**GLO2 – VTHLSTLQVGSLSVK\_2**

**GLYAL – VYGVTFHMQNQPFK\_3**

**GLYAT – TIGNLASIQSFQIK\_2**

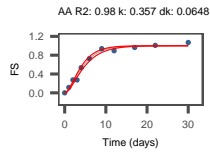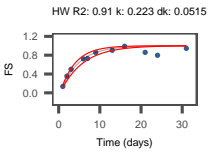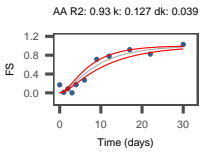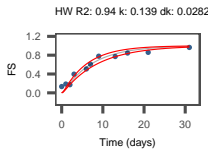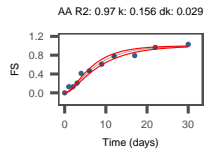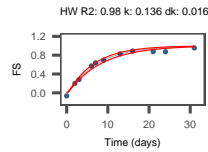

**GLOD4 – ELPDLEDLMK\_2**

**GLYAT – DPQNCQEFLESSEVINWK\_2**

**GLYC – AVLEALGSLNNK\_2**

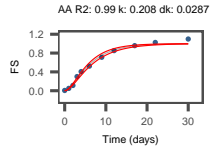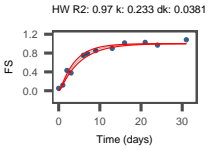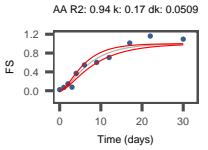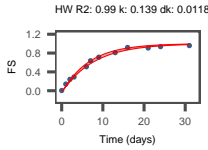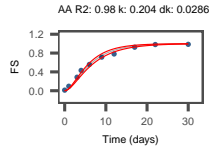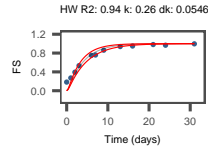

**GLSL – MAGNEFMGFSNATFQSEK\_2**

**GLYAT – IVPLQGAQLQMLEK\_3**

**GLYC(Non-Unique) – ISATSIFFESMPYK\_2**

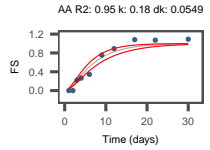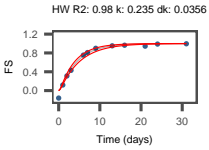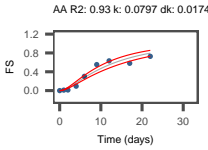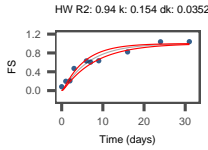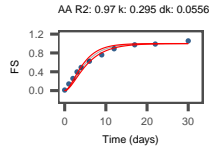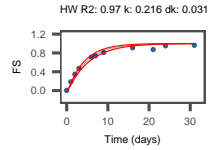

**GLSL – VAAIYPLAK\_3**

**GLYAT – LSSLDVVHAALVNK\_3**

**GLYC – VYPETGYINYDLEENASLHFPK\_3**

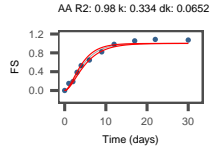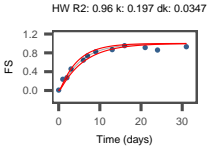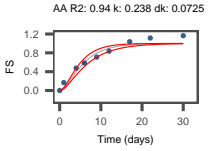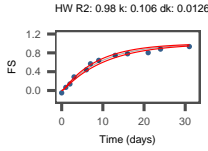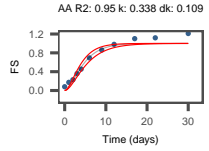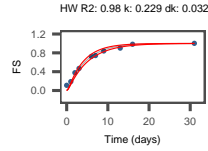

**GLYAL – EQEMGDDLDQHTNTYQIYSK\_3**

**GLYAT – QHLQIQSSQSHLNK\_3**

**GLYC – YYGTEFIDELEMLCQK\_2**

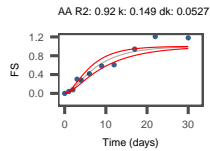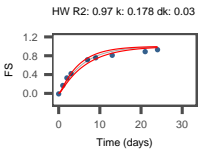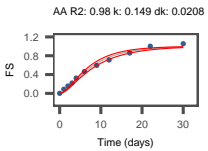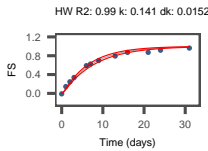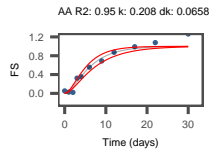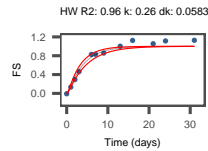

**GLYAL – GYPVYNHTEQTNK\_3**

**GLYAT – QHLQIQSSQSHLNK\_4**

**GLYM – GYSLVSGGTDTHLVLDLRPK\_4**

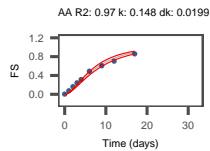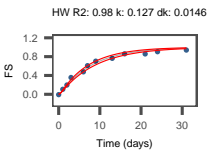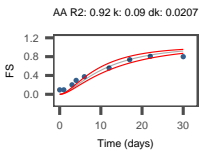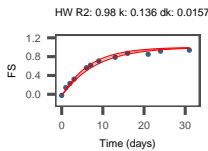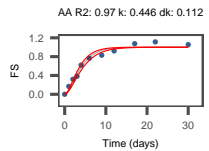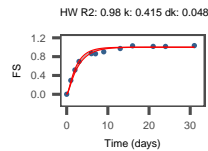

**GLYM – VLELVSTANK\_2**

**GPDA – FCETTIGCK\_2**

**GPX1 – PGGGFEPNFTLFEK\_2**

AA R2: 0.97 k: 0.327 dk: 0.0653

HW R2: 0.98 k: 0.27 dk: 0.04

AA R2: 0.99 k: 0.24 dk: 0.0328

HW R2: 0.98 k: 0.176 dk: 0.0279

AA R2: 0.96 k: 0.226 dk: 0.0486

HW R2: 0.94 k: 0.171 dk: 0.0341

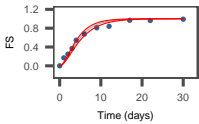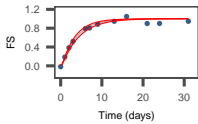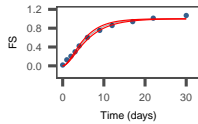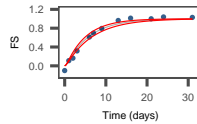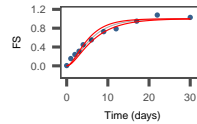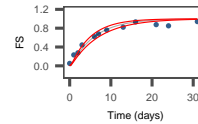

**GNMT – DVLSGDFDAVLICGNSFAHLDPCK\_2**

**GPDA – FPLFTAVYK\_2**

**GRHPR – VISTLSVGDHLALDEIK\_2**

AA R2: 0.94 k: 0.386 dk: 0.143

HW R2: 0.93 k: 0.295 dk: 0.0872

AA R2: 0.97 k: 0.306 dk: 0.0647

HW R2: 0.99 k: 0.191 dk: 0.0176

AA R2: 0.97 k: 0.18 dk: 0.0339

HW R2: 0.97 k: 0.194 dk: 0.0409

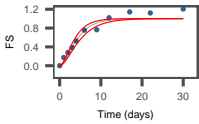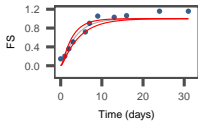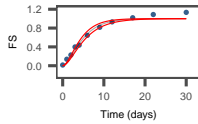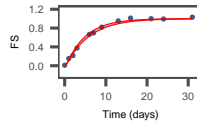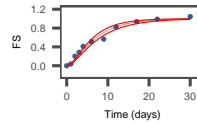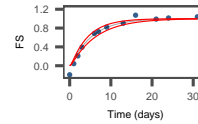

**GNMT – EPSFDNWVIEEANWLTDK\_2**

**GPDA – LTEINTQHENVK\_3**

**GRP75 – AQFEGIVTDLIK\_2**

AA R2: 0.94 k: 0.423 dk: 0.153

HW R2: 0.99 k: 0.249 dk: 0.0279

AA R2: 0.98 k: 0.26 dk: 0.0447

HW R2: 0.92 k: 0.16 dk: 0.041

AA R2: 0.98 k: 0.38 dk: 0.0777

HW R2: 0.98 k: 0.335 dk: 0.0452

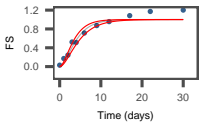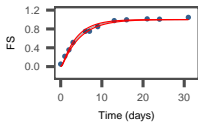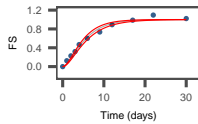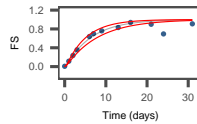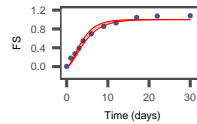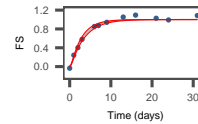

**GNMT – EPSFDNWVIEEANWLTDK\_3**

**GPDA – VCIVSGNWNWSAIK\_2**

**GRP75 – DDIIENVK\_2**

AA R2: 0.94 k: 0.378 dk: 0.133

HW R2: 0.99 k: 0.234 dk: 0.0204

AA R2: 0.99 k: 0.273 dk: 0.0394

HW R2: 0.9 k: 0.123 dk: 0.0318

AA R2: 0.96 k: 0.567 dk: 0.169

HW R2: 0.98 k: 0.21 dk: 0.0333

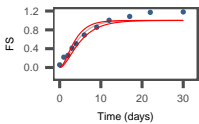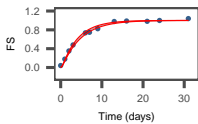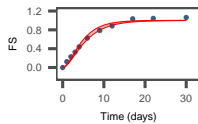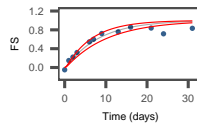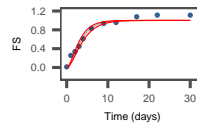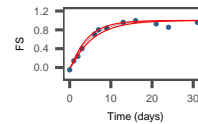

**GNMT – PGQAYVPCYFIHVLK\_3**

**GPDM – VIFFLPWEK\_2**

**GRP75 – EQQVIQSSGGLSK\_2**

AA R2: 0.98 k: 0.288 dk: 0.049

HW R2: 0.98 k: 0.176 dk: 0.0245

AA R2: 0.95 k: 0.136 dk: 0.0326

HW R2: 0.98 k: 0.109 dk: 0.0139

AA R2: 0.98 k: 0.302 dk: 0.0492

HW R2: 0.99 k: 0.276 dk: 0.0269

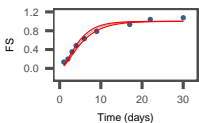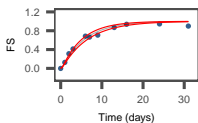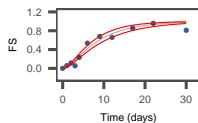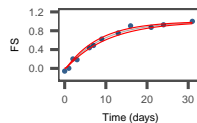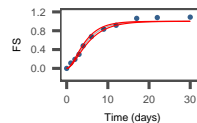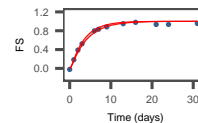

**GPDA – ANTIGISLIK\_2**

**GPX1 – NALPTSPDDTLMTDPK\_2**

**GRP75 – GAVVGIDLGTNSCVAVMEGK\_2**

AA R2: 0.99 k: 0.266 dk: 0.0371

HW R2: 0.97 k: 0.146 dk: 0.0246

AA R2: 0.94 k: 0.292 dk: 0.107

HW R2: 0.98 k: 0.166 dk: 0.0205

AA R2: 0.96 k: 0.592 dk: 0.19

HW R2: 0.98 k: 0.262 dk: 0.0338

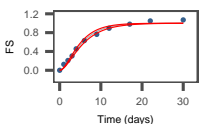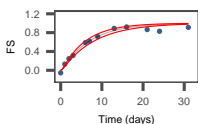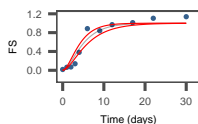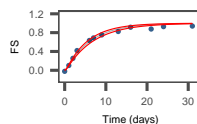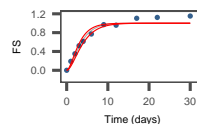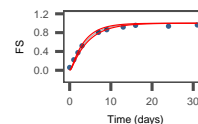

GRP75 – QAASSLQQASLK\_2

GSH0 – EFPDVLCTMSHAVEK\_3

GSTA4 – AILSYLAAK\_2

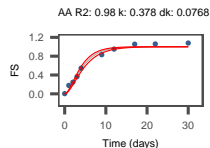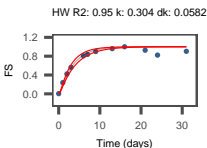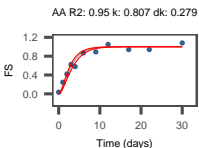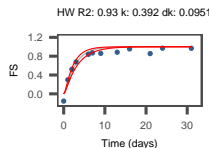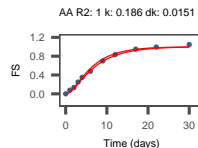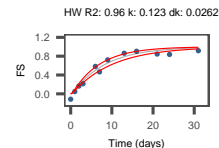

GRP75 – RYDDPEVQK\_2

GSH1 – LDFLIPLSK\_2

GSTA4 – EKEESYDILLSR\_3

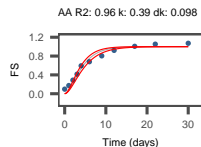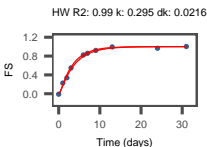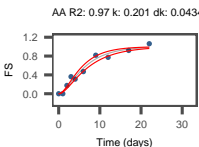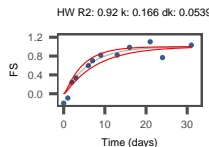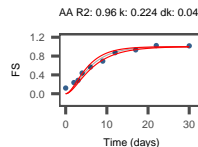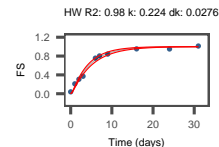

GRP75 – SQVFSTAADGQTQVEIK\_2

GSTA1\_HUMAN,sp|P10648|GSTA2(Non-Unique) – WLLAAAGVFEEK\_2

GSTA4 – KPPDPGYPVEVVR\_2

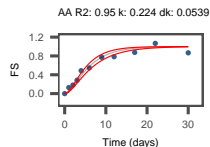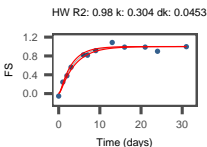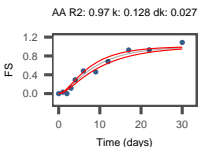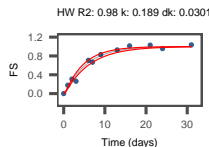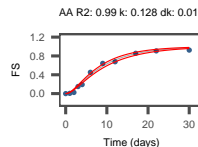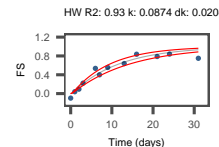

GRP75 – VIAVYDLGGGTFDISILEIQK\_2

GSTA1\_HUMAN,sp|P30115|GSTA3(Non-Unique) – YFPAFEK\_2

GSTA4 – YFPVFEK\_2

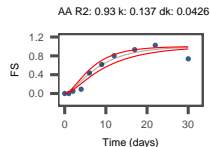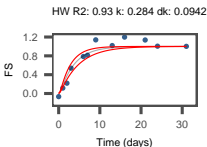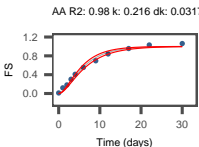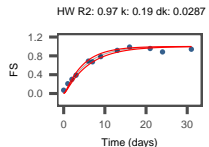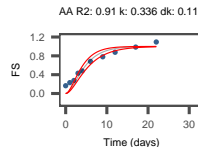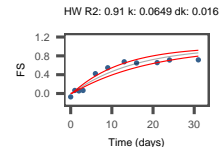

GRP75 – VINEPTAALAYGLDK\_2

GSTA2(Non-Unique) – YLPAFEK\_2

GSTK1 – LELLAYLLGEK\_2

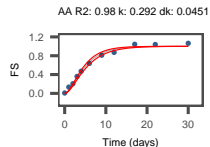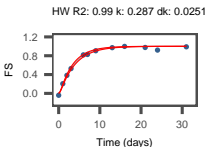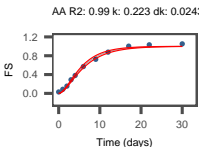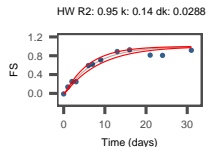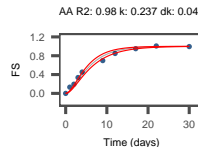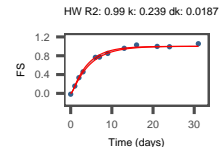

GRPE1 – DLLEVADILEK\_2

GSTA3 – VSNLPTVK\_2

GSTK1 – QFFQVPLNIPK\_2

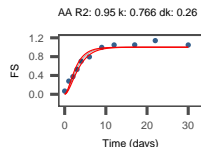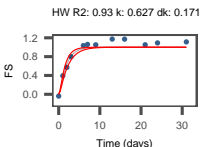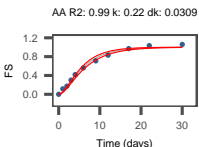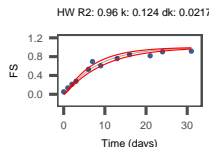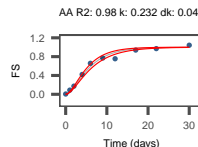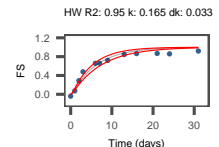

**GSTK1 - YGAFGLPTTVAHVGDGK\_3**

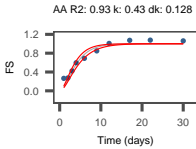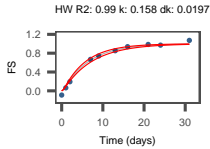

**GSTM1(Non-Unique) - LGLDFPNLPYLIDGSHK\_3**

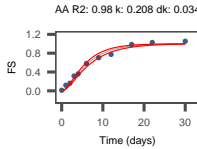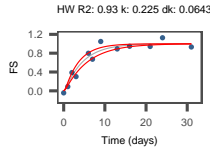

**GSTM6 - LDLDFFPNLPYLIDGSHK\_3**

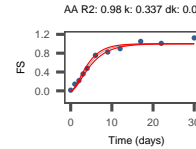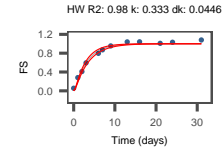

**GSTM1 - CYNPDFEK\_2**

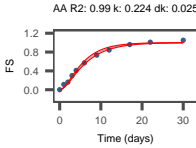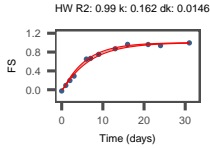

**GSTM1 - MLLEYDSSSYDEK\_2**

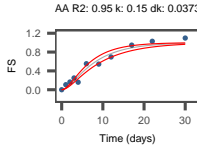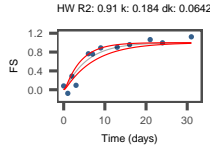

**GSTM7 - YTMGDAPDYDQSQWLNEK\_2**

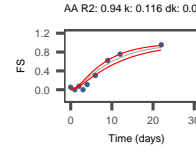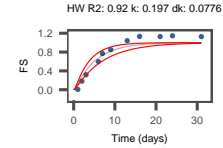

**GSTM1 - KHHLDGETEER\_2**

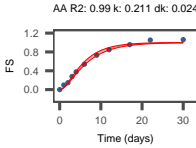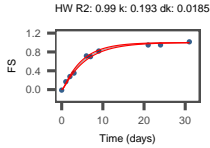

**GSTM1 - MLLEYDSSSYDEKR\_3**

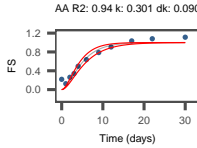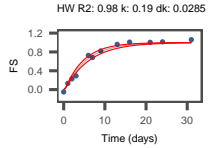

**GSTP1(Non-Unique) - AFLSSPEHVNRPINGNK\_3**

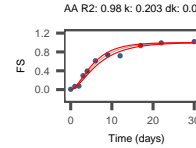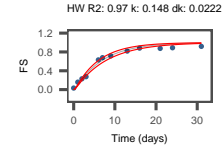

**GSTM1 - KHHLDGETEER\_3**

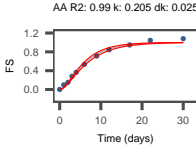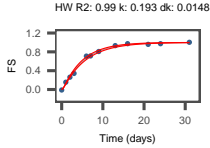

**GSTM1(Non-Unique) - RPWFAGDK\_2**

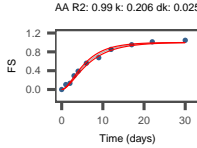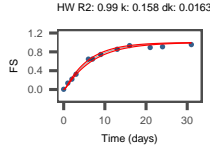

**GSTP1(Non-Unique) - EEVVTIDTWMQGLLK\_3**

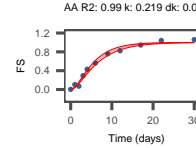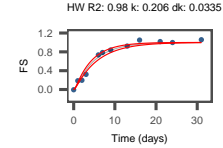

**GSTM1 - KHHLDGETEER\_4**

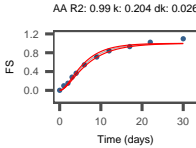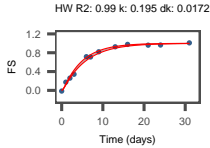

**GSTM1 - YIATPIFSK\_2**

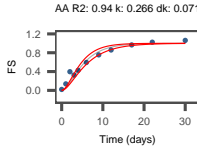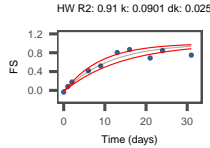

**GSTP1(Non-Unique) - PTCLYGQLPK\_2**

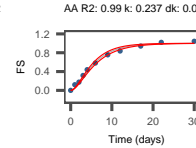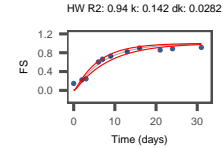

**GSTM1 - LCYNPDFEK\_2**

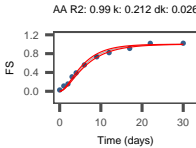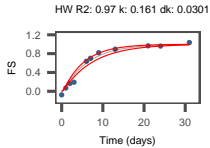

**GSTM3 - FNLGLDFPNLPYLIDGSHK\_3**

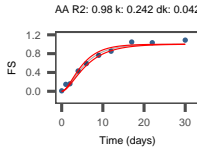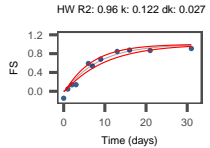

**GSTP1(Non-Unique) - SLGLYK\_2**

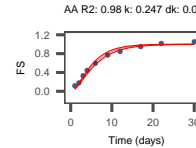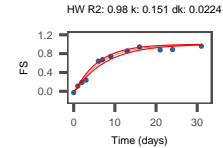

**GSTP1\_HUMAN,sp|P19157|GSTP1(Non-Unique) – ETLLSQNGGK\_2**

**H12(Non-Unique) – SGVSLAALK\_2**

**H2AZ(Non-Unique) – ATIAGGVPIHIK\_2**

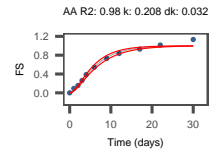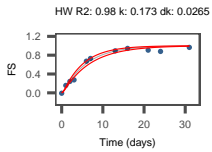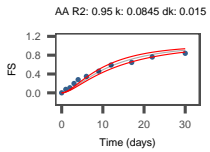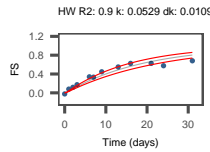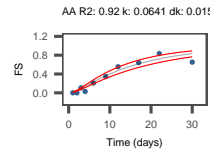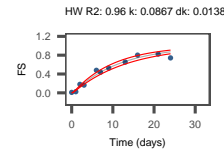

**GSTP1\_HUMAN,sp|P19157|GSTP1(Non-Unique) – MLLADQGGWK\_2**

**H14 – TSGPPVELITK\_2**

**H2AZ(Non-Unique) – SAAILEYLTAEVLELAGNASK\_3**

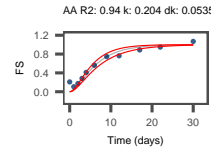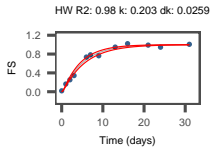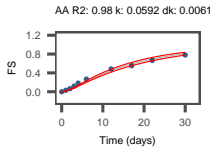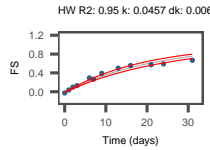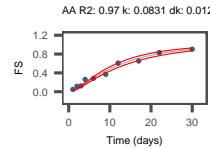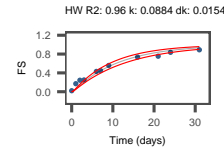

**GSTP1\_HUMAN,sp|P19157|GSTP1(Non-Unique) – PFETLLSQNGGK\_2**

**H2A1B(Non-Unique) – VTIAQGGVLPNIQAVLLPK\_2**

**H2B1F(Non-Unique) – QVHPDTGISSK\_2**

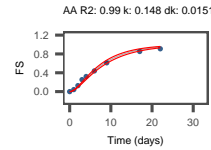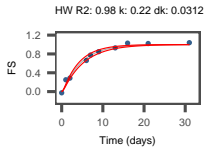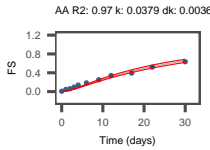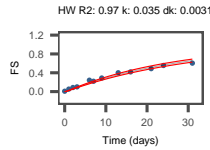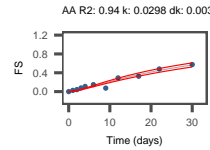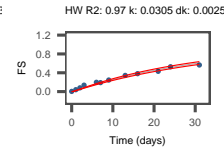

**GSTT2 – GQHMQFSQVNCNLNK\_2**

**H2A1B(Non-Unique) – VTIAQGGVLPNIQAVLLPK\_3**

**H2B1F(Non-Unique) – QVHPDTGISSK\_3**

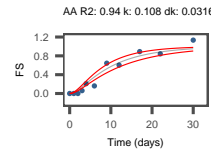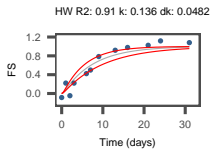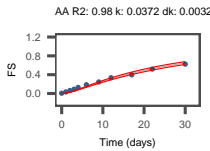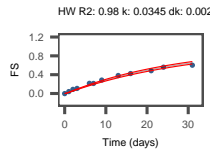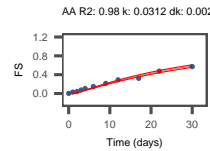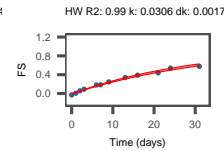

**GSTT2 – VLGPLIGVQVPEK\_2**

**H2AX(Non-Unique) – LLGGVTIAQGGVLPNIQAVLLPK\_3**

**H4 – DAVTYTEHAK\_3**

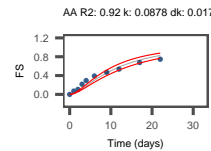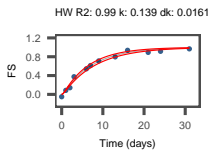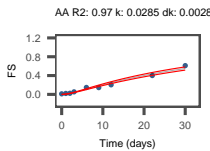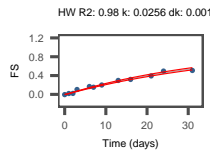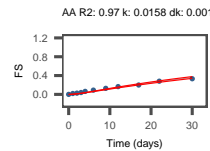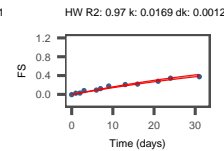

**GYS2 – SPFSLNHFPK\_3**

**H2AY – GVTIASGGVLPNIHPELLAK\_3**

**HACL1 – LDAGSFGTMGVGLGFAIAALVAK\_3**

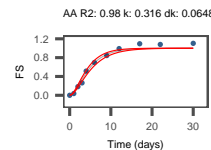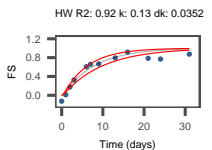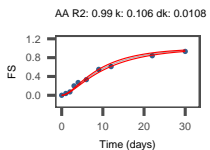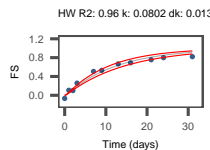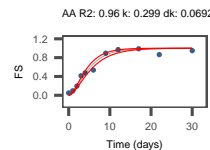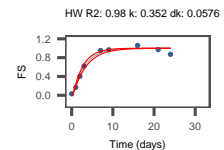







HMCS2 - LVSSVSDLPK\_2

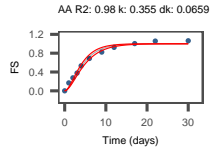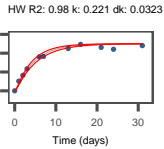

HNRPD(Non-Unique) - GFGFVLFK\_2

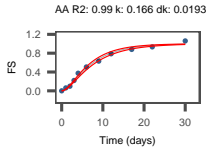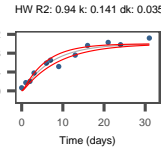

HNRPQ - DLFEDELPLFEK\_2

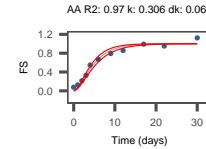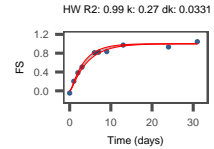

HMCS2 - PTGGAGAVMLIGPK\_3

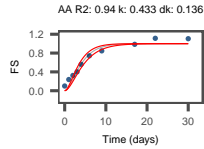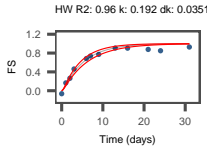

HNRPK - IILDISESPIK\_2

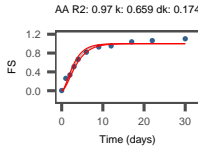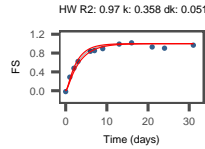

HNRPU - DLPEHAVLK\_2

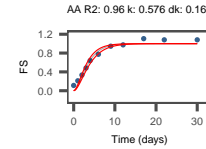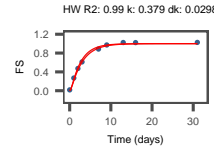

HMCS2 - TKLPWDAVGR\_3

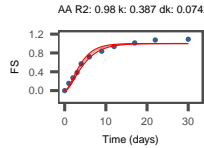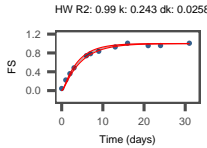

HNRPK - IITITGTQDIQNAQYLLQNSVK\_3

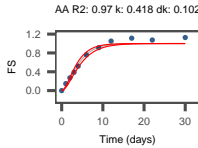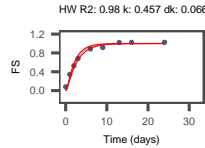

HNRPU - YNILGTNTIMDK\_2

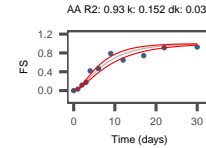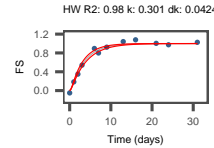

HMGL - GYVSCALGCPYEGK\_2

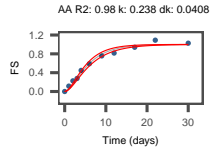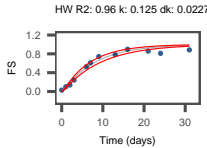

HNRPK - ILSISADIETIGELK\_2

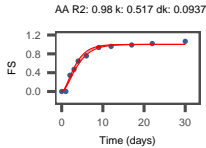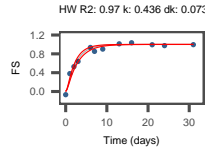

HOGA1 - FGIPGLK\_2

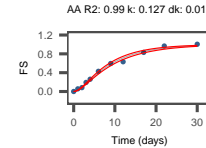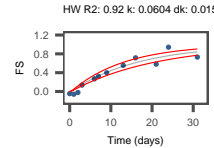

HMGL - LIDMLSEAGLPVIEATSFVSPK\_2

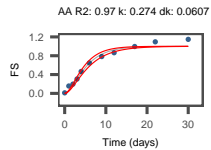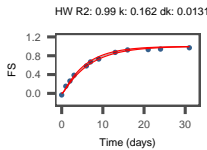

HNRPK - LLIHQSLAGGIIVK\_2

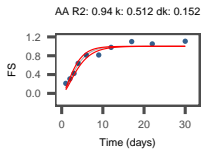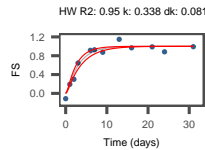

HOGA1(Non-Unique) - LGIIVHK\_2

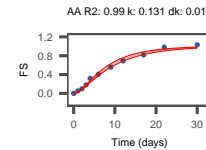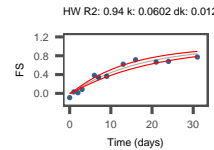

HMGL - LIDMLSEAGLPVIEATSFVSPK\_3

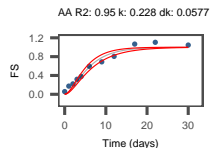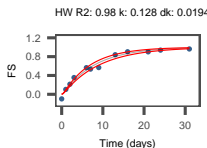

HNRPK - LLIHQSLAGGIIVK\_3

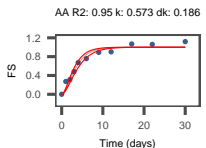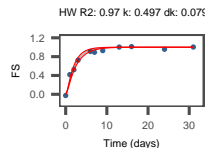

HPPD - DIAFEVEDCDHIVQK\_3

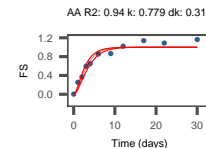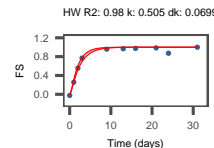

HPPD - EVVSHVIK\_2

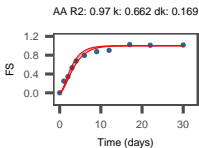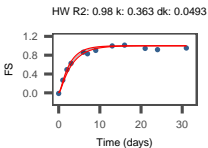

HS90A(Non-Unique) - ADLNNLGTIAK\_2

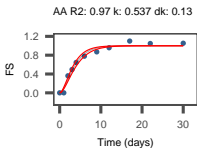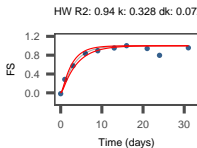

HS90B - NPDDITQEEYGEFYK\_2

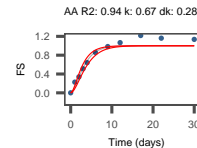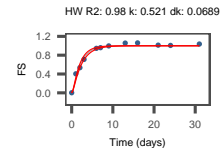

HPPD - GYLLQIFTK\_2

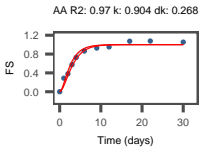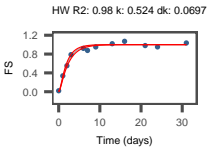

HS90A - ELHNLIPSK\_3

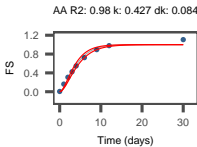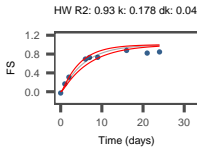

HSDL2 - DEQQINSAVEK\_2

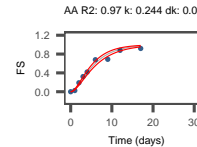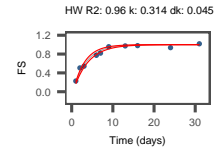

HPPD - SIVVTNYEESIK\_2

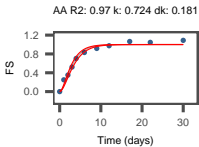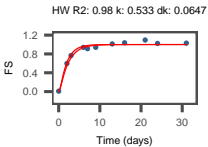

HS90A - NPDDITNEEYGEFYK\_2

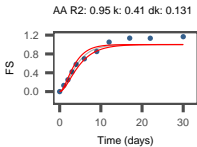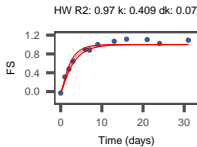

HSDL2 - LQLQEESQLQK\_2

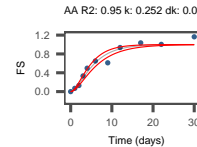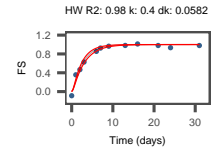

HPRT - FFADLLDIYK\_2

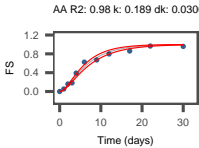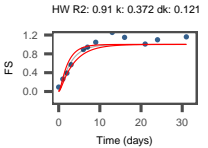

HS90A(Non-Unique) - YESLTDPSK\_2

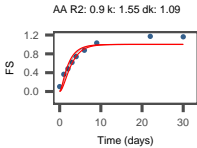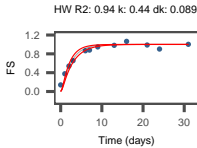

HSP74 - STNEAMEWMNSK\_2

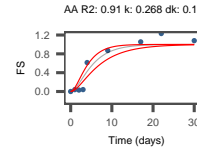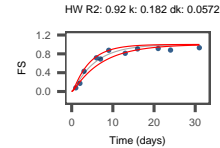

HS71L(Non-Unique) - IINEPTAAAIYGLDK\_2

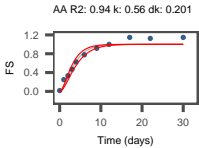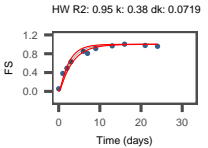

HS90A - YYTASGDEMVLK\_2

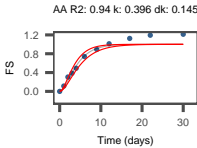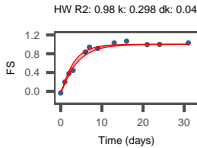

HSP7C - GPAVIGDLGTTYSCGVFQHGK\_3

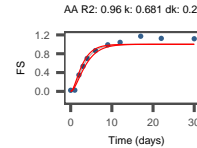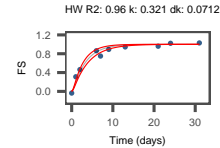

HS74L(Non-Unique) - LMNETTAVALYGIYK\_2

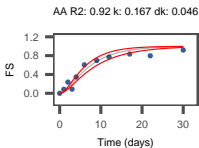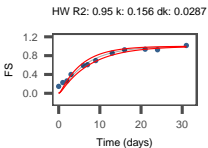

HS90B - DNSTMGYMMAK\_2

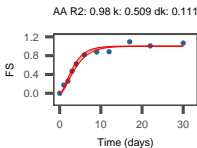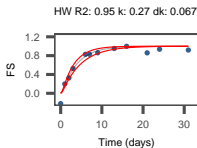

HSP7C - SINPDEAVYGAQVAAILSGDK\_2

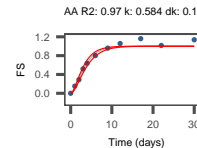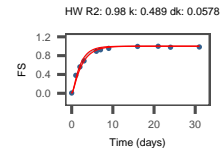

HSP7C - SINPDEAVAYGAAVQAAILSGDK\_3

HUTI - SLAVLEGASVVVGTDLGIK\_2

HYEP - SAFPSEILHAPEK\_3

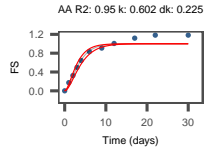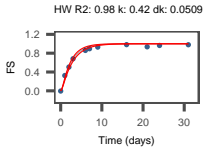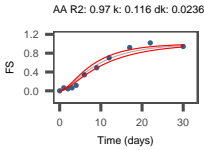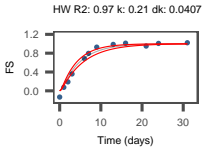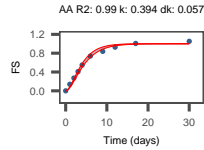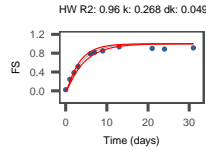

HUTH - CTAALVSESK\_2

HUTU - VAIAVAINQAIASGK\_2

HYEP - VETSDEEIKDLHR\_4

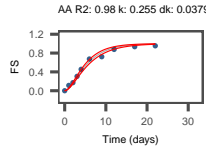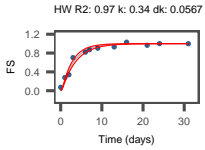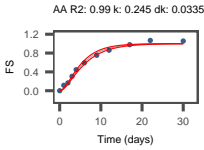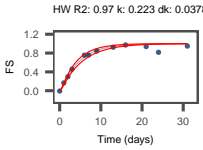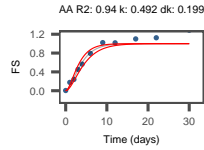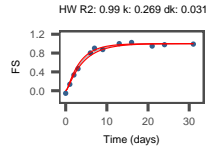

HUTH - GETISGGNFHGEYPAK\_2

HUTU - VVFTSGLGGMSGAAK\_2

HYES - ASDETGFIIVHK\_2

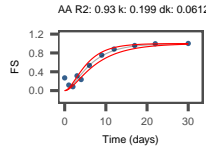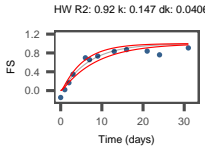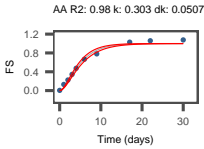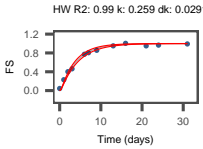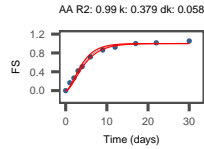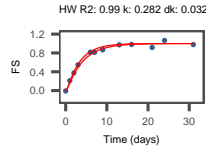

HUTH - QADIVAALTLEVLK\_2

HYEP - IEGLDHFHVHPQLPSGR\_4

HYES - ASDETGFIIVHK\_3

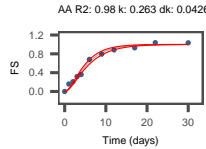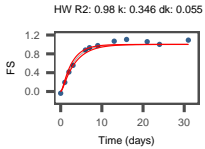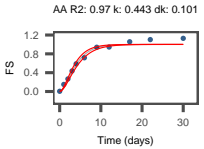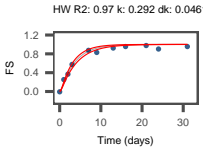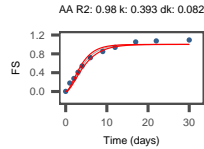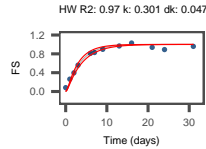

HUTI - AVGPAVIQK\_2

HYEP - IEGLDHFHVHPQLPSGR\_5

HYES - AVASLNTPFMPDPDVPSPK\_2

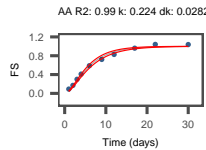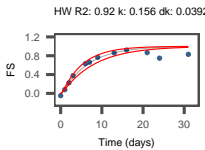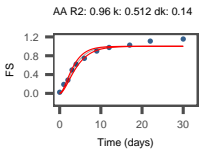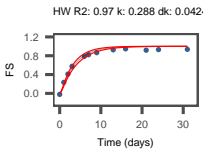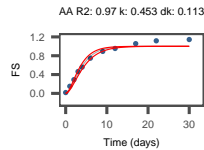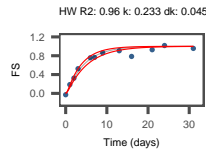

HUTI - MSMPEALAAATINAAYALGK\_3

HYEP - IIPLLTDPK\_2

HYES - AVASLNTPFMPDPDVPSPK\_3

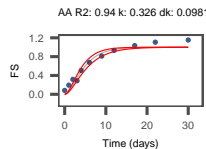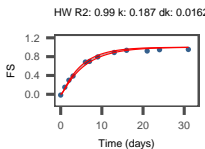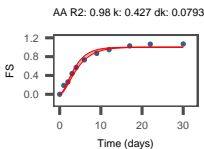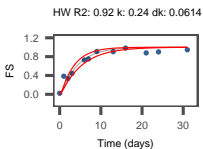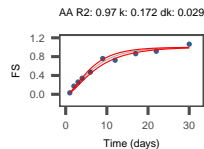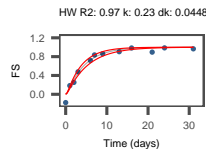

**HYES - DFLLGAYQTEFPEGPTQLMK\_2**

**HYES - SINRPMQLAAIALK\_3**

**IDHC - ALEDVCIETIEAGFMTK\_3**

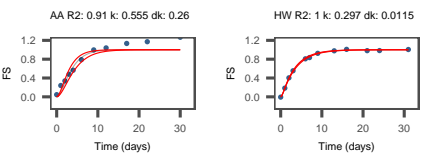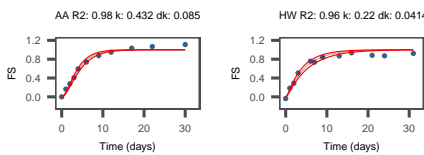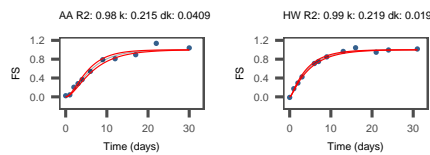

**HYES - EMVTFDLK\_2**

**HYES - WLQTEVQNPSVTSK\_2**

**IDHC - GWPLYLSTK\_2**

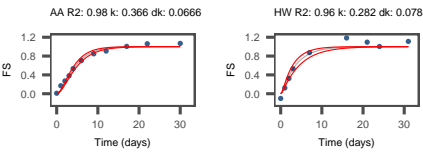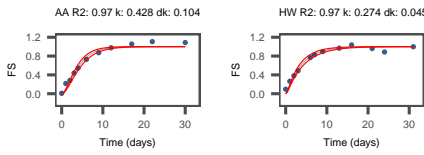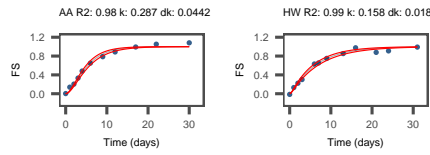

**HYES - GFTTCIVTNWLDGDGKR\_3**

**IAH1 - DCGTDVLDLWTLMQK\_2**

**IDHC(Non-Unique) - IIWELIK\_2**

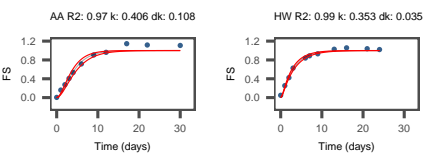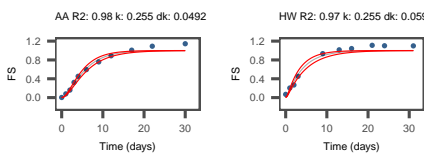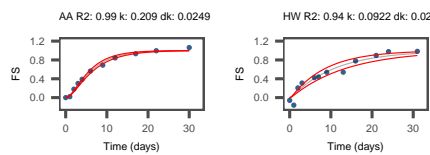

**HYES - ILPALMVTAEK\_2**

**IAH1 - VILITPPPLCEAAWEK\_2**

**IDHC - LIDDMVAQAMK\_2**

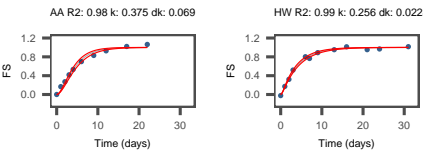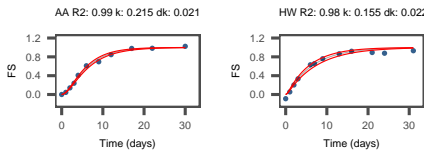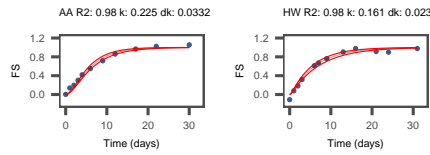

**HYES - ITTEEEIEFYQQFK\_3**

**IAH1 - VSSLPWLLPYWK\_2**

**IDHC - LVTGWVKPIIIRG\_3**

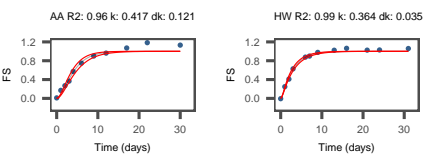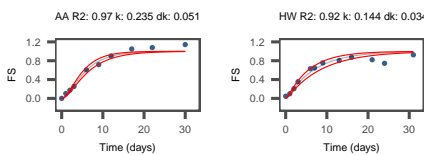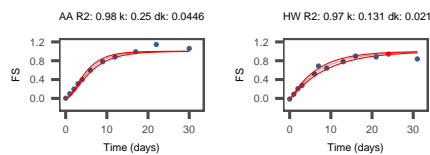

**HYES - IYNFLDLTK\_2**

**IDHC - ALEDVCIETIEAGFMTK\_2**

**IDHC - SDYLNTFEFMDK\_2**

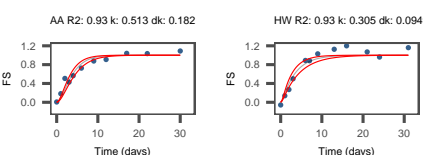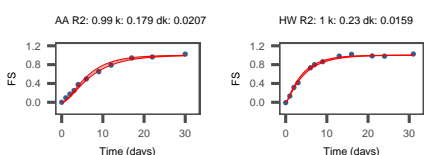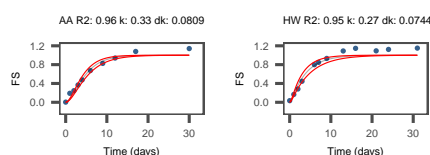

IDHC - SEGGFIWACK\_2

IDHP(Non-Unique) - IIWQFIK\_2

IF4A2(Non-Unique) - GIYAGFEKPSAIQQR\_2

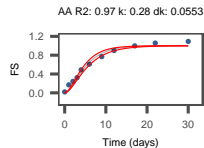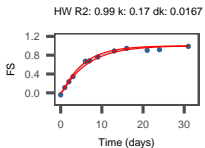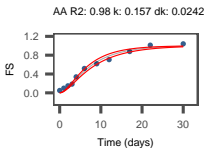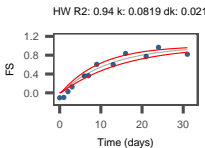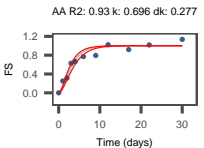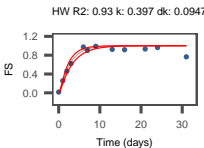

IDHC - SIEDFAHSSFQMALS\_K\_2

IDHP - LIDDMVAQVLK\_2

IF4A2(Non-Unique) - GYDVIQAQSGTGK\_2

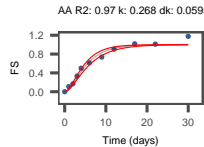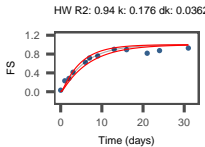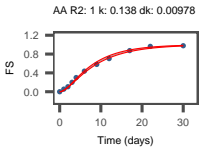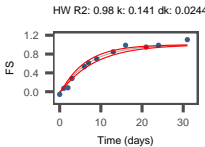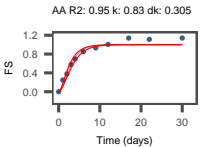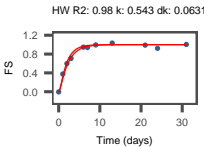

IDHC - SIEDFAHSSFQMALS\_K\_3

IDHP - LILPHVDVQLK\_3

IF4G1 - IHNAENIQPGEQK\_2

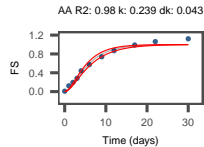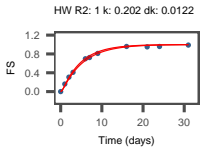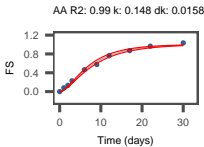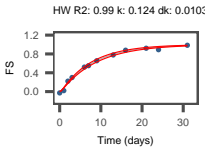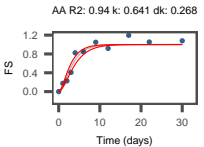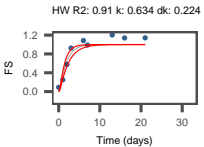

IDHC - VEITYTPK\_2

IF2A - TEGLSVLNQAMAVIK\_2

IF4G2 - GLSFLFPLLK\_2

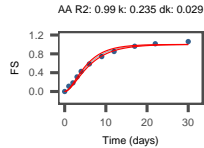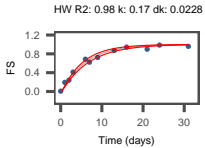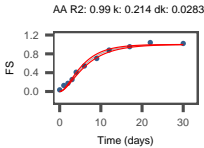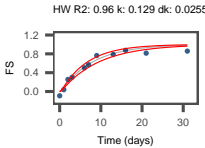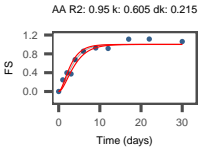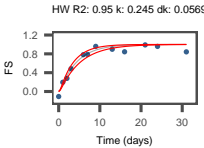

IDHP - DIFQEIDK\_2

IF4A1 - DFTVSAMHGMDQK\_2

IF5A1(Non-Unique) - VHLVGIDIFTGK\_3

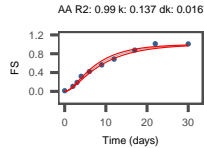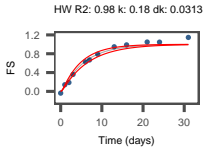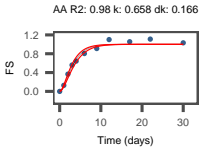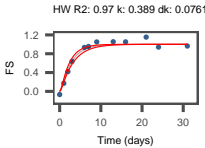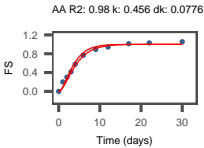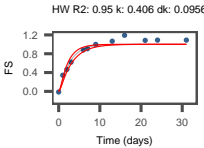

IDHP - DQTNQDVTDLSALATQK\_2

IF4A1 - LNSNTQVLLSATMPSDVLEVK\_2

IF5A1(Non-Unique) - YEDICPSTHMDVPIK\_3

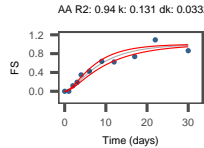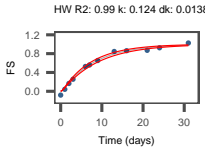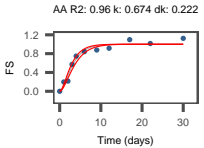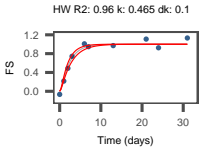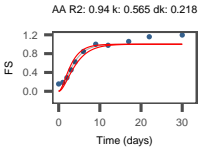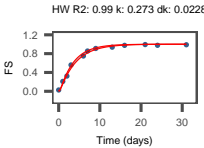

**IMB1 - GALQYLPILTQTLTK\_3**

**INMT - VYIGGEDYEK\_2**

**IPYR - GYIWNYGAIPTQWEDPGHSDK\_3**

AA R2: 0.91 k: 0.277 dk: 0.0891

HW R2: 0.97 k: 0.313 dk: 0.0563

AA R2: 0.99 k: 0.205 dk: 0.0268

HW R2: 0.97 k: 0.221 dk: 0.0458

AA R2: 0.92 k: 0.405 dk: 0.159

HW R2: 0.99 k: 0.208 dk: 0.0202

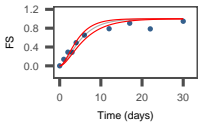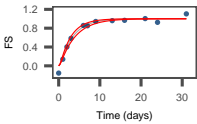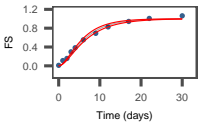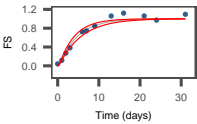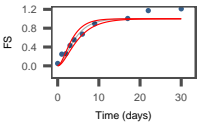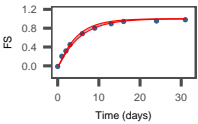

**INMT - AIQDAGCQVLK\_2**

**INPP - TLADVLVQEVIK\_2**

**IPYR - LKPGYLEATVDWFR\_3**

AA R2: 0.99 k: 0.198 dk: 0.0251

HW R2: 0.99 k: 0.181 dk: 0.0139

AA R2: 0.95 k: 0.09 dk: 0.0181

HW R2: 0.92 k: 0.144 dk: 0.0366

AA R2: 0.98 k: 0.246 dk: 0.0362

HW R2: 0.99 k: 0.213 dk: 0.0159

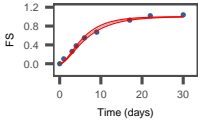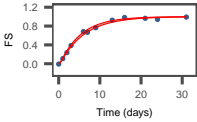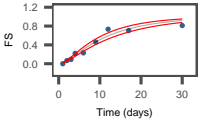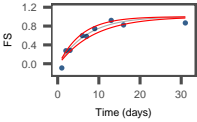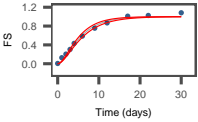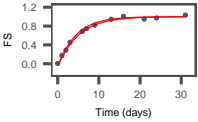

**INMT - DYLTYYSFHSGPVAEQEVIK\_2**

**IPYR - AIVDALPPPCESACSLPTDVK\_2**

**IPYR - VIAINVDPPDAANYK\_2**

AA R2: 0.97 k: 0.21 dk: 0.0475

HW R2: 1 k: 0.173 dk: 0.0118

AA R2: 0.93 k: 0.142 dk: 0.0337

HW R2: 0.94 k: 0.337 dk: 0.106

AA R2: 0.97 k: 0.274 dk: 0.0579

HW R2: 0.99 k: 0.245 dk: 0.0266

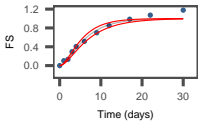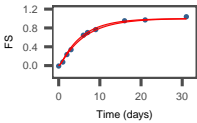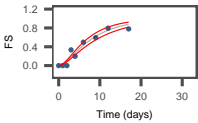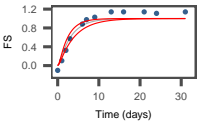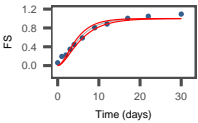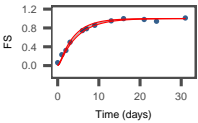

**INMT - FSGVYLEK\_2**

**IPYR - DFAVDIIK\_2**

**IPYR - VLGILAMIDEGETDWK\_2**

AA R2: 0.96 k: 0.318 dk: 0.0675

HW R2: 0.98 k: 0.18 dk: 0.0246

AA R2: 0.99 k: 0.245 dk: 0.0324

HW R2: 0.97 k: 0.196 dk: 0.0394

AA R2: 0.96 k: 0.372 dk: 0.107

HW R2: 0.99 k: 0.236 dk: 0.0268

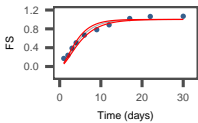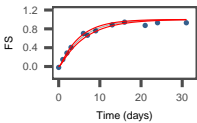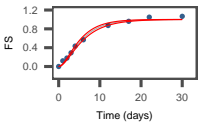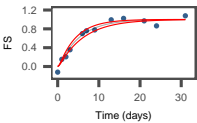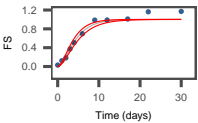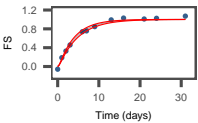

**INMT - KEPGAYDWSSIVQH\_3**

**IPYR - GISCMNTTVSESPFK\_2**

**IPYR2 - ADCKEEHDIRP\_3**

AA R2: 0.93 k: 0.227 dk: 0.0634

HW R2: 0.97 k: 0.141 dk: 0.0216

AA R2: 0.96 k: 0.298 dk: 0.0739

HW R2: 0.98 k: 0.161 dk: 0.0185

AA R2: 0.96 k: 0.205 dk: 0.046

HW R2: 0.97 k: 0.166 dk: 0.0236

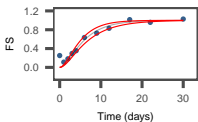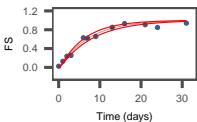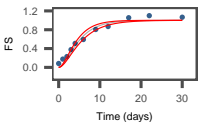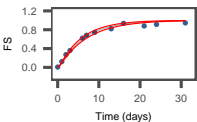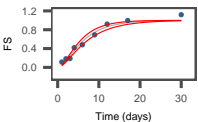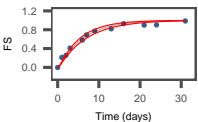

**INMT - KEPGAYDWSSIVQHACELEGDR\_3**

**IPYR - GQYISPFHDVPIYADK\_3**

**IQGA2 - LGIAPQIQDLLGK\_2**

AA R2: 0.95 k: 0.252 dk: 0.0699

HW R2: 0.96 k: 0.216 dk: 0.0487

AA R2: 0.9 k: 0.612 dk: 0.33

HW R2: 0.92 k: 0.235 dk: 0.055

AA R2: 0.97 k: 0.315 dk: 0.0741

HW R2: 0.97 k: 0.352 dk: 0.0556

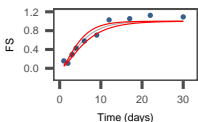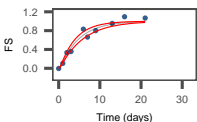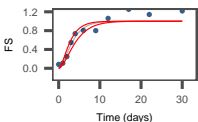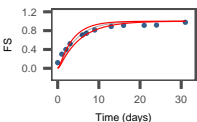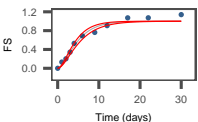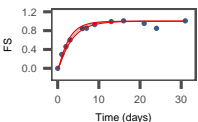

ISC2A - ILPESSILFLCDLQEK\_2

K1C18 - VKYETELAMR\_3

K2C8 - TKTEISEMNR\_2

AA R2: 0.98 k: 0.125 dk: 0.0184

HW R2: 0.99 k: 0.148 dk: 0.0119

AA R2: 0.98 k: 0.101 dk: 0.0108

HW R2: 0.96 k: 0.0682 dk: 0.0114

AA R2: 0.98 k: 0.117 dk: 0.0161

HW R2: 0.97 k: 0.0852 dk: 0.0122

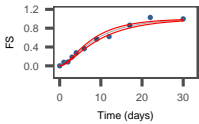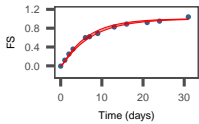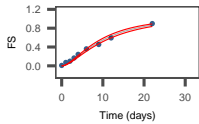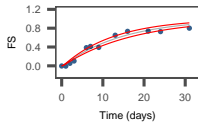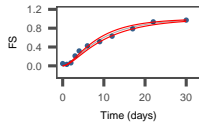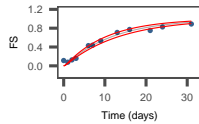

ISOC1 - GLGSTVQEIDLTVGK\_2

K2C8 - AEAETMYQIK\_2

K2C8 - YEELQTLGAK\_2

AA R2: 0.94 k: 0.531 dk: 0.182

HW R2: 0.97 k: 0.25 dk: 0.0436

AA R2: 0.99 k: 0.116 dk: 0.0127

HW R2: 1 k: 0.0895 dk: 0.00507

AA R2: 0.92 k: 0.152 dk: 0.0575

HW R2: 0.99 k: 0.144 dk: 0.0163

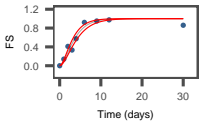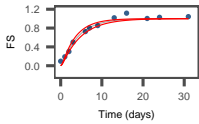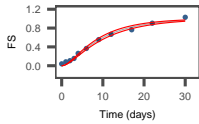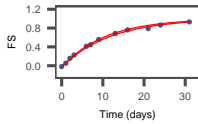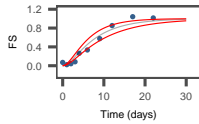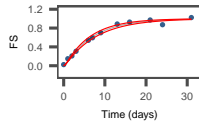

K1C18 - AQEYEAQK\_2

K2C8 - DVDEAYMNK\_2

KAD2 - AVLLGPPGAGK\_2

AA R2: 0.99 k: 0.0883 dk: 0.00901

HW R2: 0.96 k: 0.0862 dk: 0.0142

AA R2: 0.99 k: 0.105 dk: 0.00806

HW R2: 0.98 k: 0.0898 dk: 0.0116

AA R2: 0.99 k: 0.15 dk: 0.0176

HW R2: 0.95 k: 0.112 dk: 0.0199

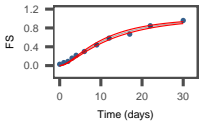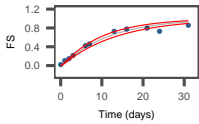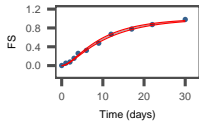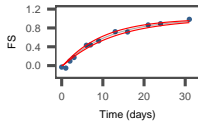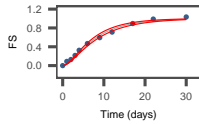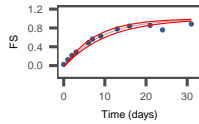

K1C18 - QAQEYEAALLNK\_2

K2C8 - GSMGTGVLGGFGGAGVGGITAVTVNQSLLSPLK\_2

KAD2 - GIHCDAISQTPDIVFASILAFAFK\_3

AA R2: 0.99 k: 0.0961 dk: 0.00997

HW R2: 0.98 k: 0.0912 dk: 0.0119

AA R2: 0.94 k: 0.122 dk: 0.0333

HW R2: 0.95 k: 0.157 dk: 0.0366

AA R2: 0.95 k: 0.221 dk: 0.0577

HW R2: 0.99 k: 0.118 dk: 0.0102

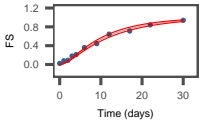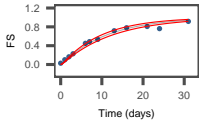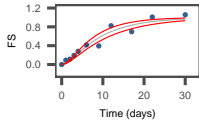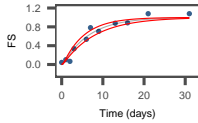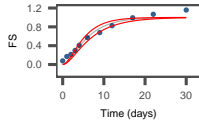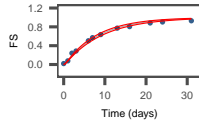

K1C18 - SVWGGSVGSAGLAGMGGIQTCK\_3

K2C8 - LEALGNMQGLVEDFK\_2

KAD3 - VYQIDTVINLNPVFEVIK\_2

AA R2: 0.96 k: 0.134 dk: 0.0282

HW R2: 0.99 k: 0.0821 dk: 0.0092

AA R2: 0.98 k: 0.0981 dk: 0.0139

HW R2: 0.96 k: 0.0958 dk: 0.0173

AA R2: 0.97 k: 0.242 dk: 0.0483

HW R2: 0.99 k: 0.228 dk: 0.0182

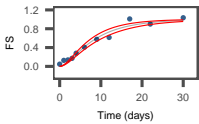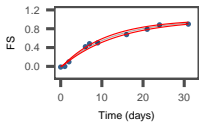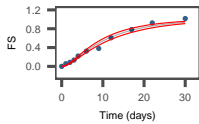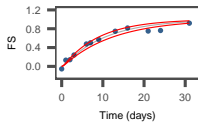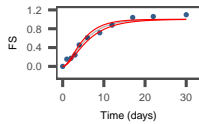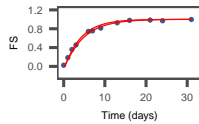

K1C18 - VKLEAEIATYR\_2

K2C8 - LVSESSDVSK\_2

KAD3 - VYQIDTVINLNPVFEVIK\_3

AA R2: 0.96 k: 0.0742 dk: 0.0143

HW R2: 0.96 k: 0.0727 dk: 0.0121

AA R2: 0.99 k: 0.132 dk: 0.0108

HW R2: 0.98 k: 0.101 dk: 0.0115

AA R2: 0.98 k: 0.254 dk: 0.0467

HW R2: 0.94 k: 0.234 dk: 0.0494

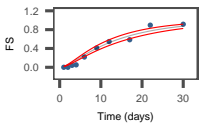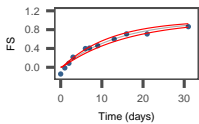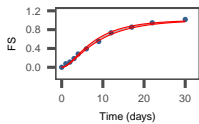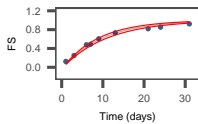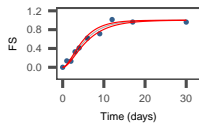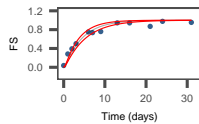



**KAT3 – LAADPSVVLNGQGFDPDISPPSYVK\_2**

**KHK – TILYDTNLPLDVSAK\_2**

**LAGB2 – NINNDTTYCIK\_2**

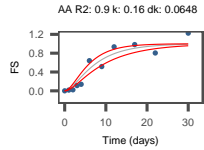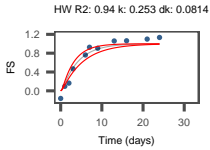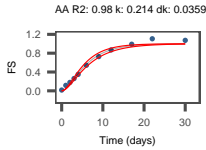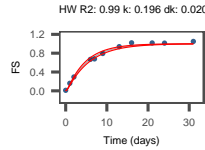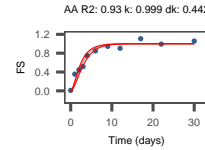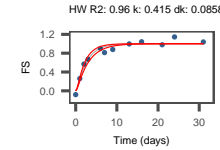

**KBL – ALDLLMESNAIIQSSMAAK\_3**

**KMO – AIGLEDQIVSK\_2**

**LAMP2 – VPLDIVFK\_2**

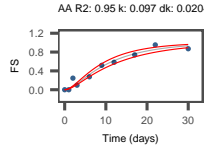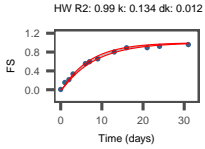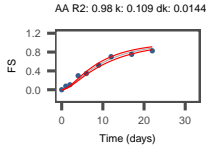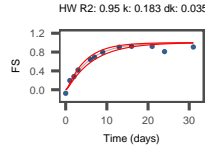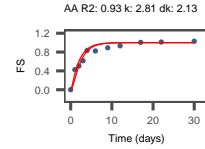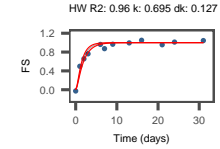

**KBL – GTDELLGVMQVTIINSTLKG\_2**

**KMO – SDVLDFQK\_2**

**LDHA – DLADELALVDVMEDK\_3**

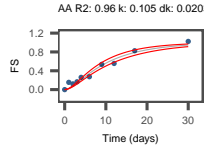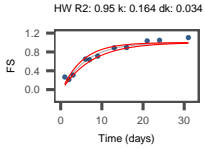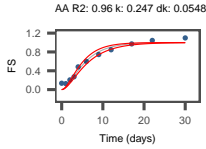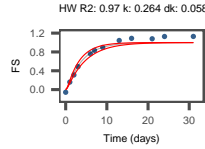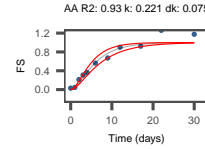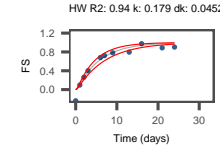

**KEG1 – HCQEFLGSSEVINWK\_2**

**KPYR – GSQVLTVDPK\_2**

**LDHA – DQLIVNLLK\_2**

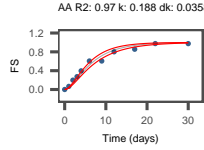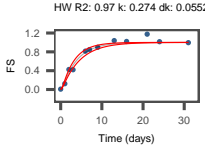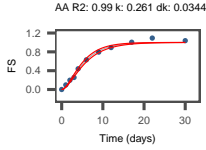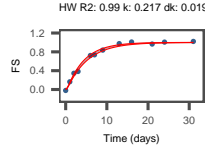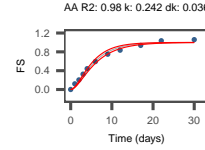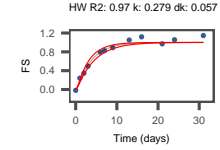

**KEG1 – LGFPMYAHVDK\_3**

**KPYR – PVAIALDTK\_2**

**LDHA – GYTSWAIGLSVADLAESIMK\_3**

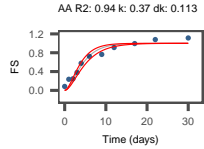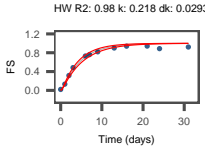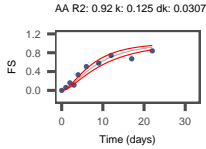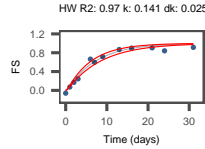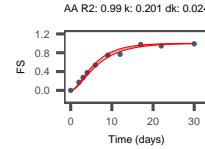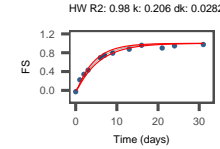

**KEG1 – QHLQIQSSSDLGK\_2**

**KYNU – MGAYGHVGVK\_2**

**LDHA – LLVSNPVDILTIVAWK\_2**

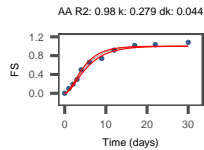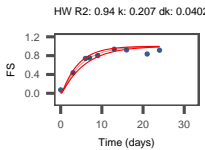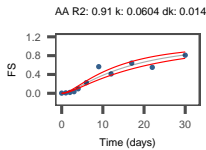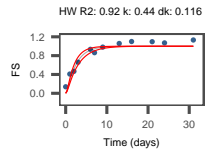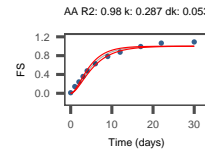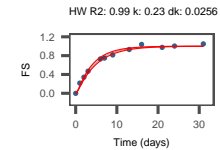

**LDHA – LLIVSNPDLTYVAWK\_3**

**LGUL – GFGHGIAPVDVYSACK\_3**

**LONM – AQLSAAVLTLLIK\_2**

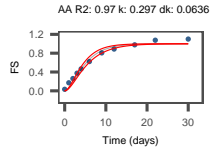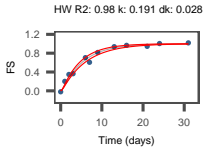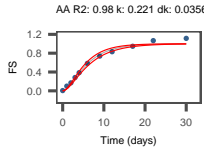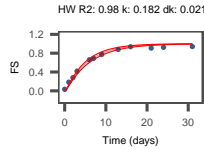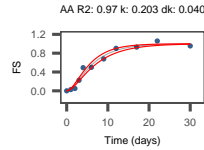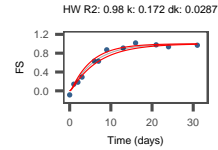

**LDHA – QVVDASAYEVIK\_2**

**LGUL – GLAFIQDPDGYWIELNPNK\_2**

**LPPRC – LIQALALK\_2**

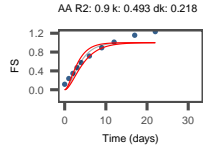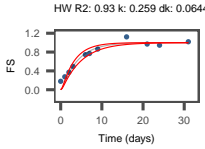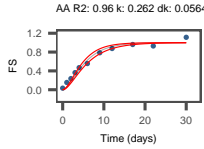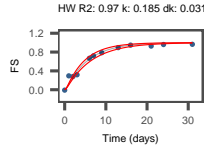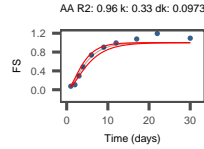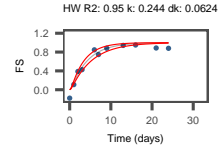

**LDHA – VHPISTMIK\_2**

**LGUL – GLAFIQDPDGYWIELNPNK\_3**

**LRC59 – LVTLPVSAFLK\_2**

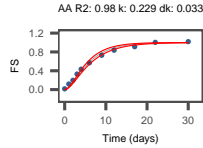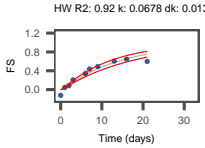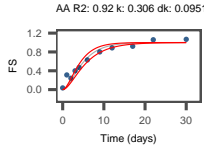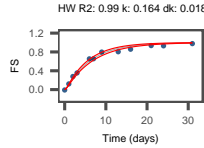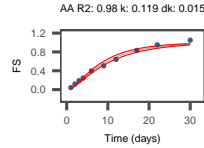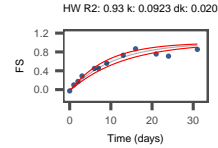

**LEG1 – FNAHGDAIVCNK\_3**

**LGUL – VLGLTLQK\_2**

**LYAG – QLLWGPALLITPVLEPGK\_2**

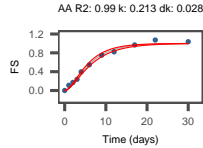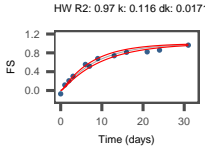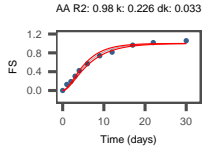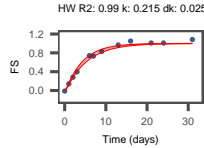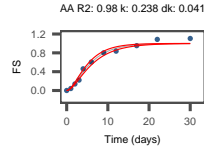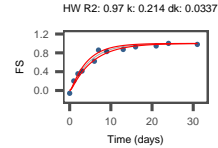

**LEG9 – FEEGGYVCNK\_2**

**LHPP – AFQVLMELNPVLSLKG\_2**

**LYPA1 – ATAAVIFHLGLDGTGHGWAEAFAGIK\_4**

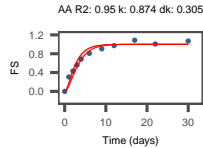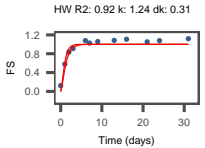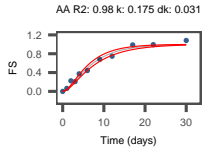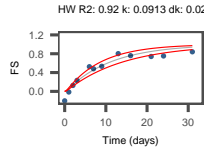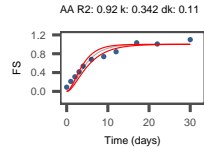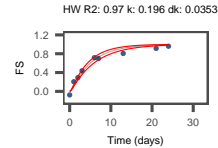

**LGUL – GFGHGIAPVDVYSACK\_2**

**LICH – LYDEISLMK\_2**

**M2GD – AWGSEMCDNTPLEAGLEYFVK\_2**

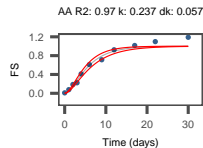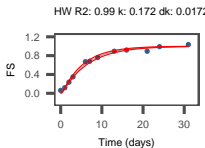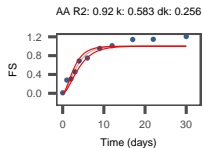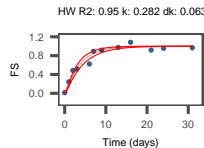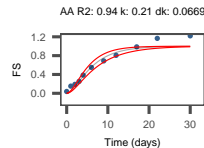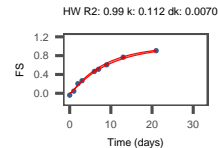

**M2GD – AYVPVQLSEVGQQVEVLLGK\_2**

**M2GD – TNWFEPVSEYK\_2**

**MAAI – LLPQDPQKR\_2**

AA R2: 0.94 k: 0.0664 dk: 0.0164

HW R2: 0.94 k: 0.134 dk: 0.0365

AA R2: 0.98 k: 0.145 dk: 0.0234

HW R2: 0.98 k: 0.0993 dk: 0.0126

AA R2: 0.98 k: 0.19 dk: 0.0373

HW R2: 0.97 k: 0.155 dk: 0.0224

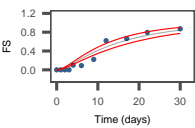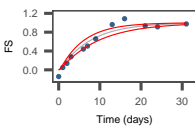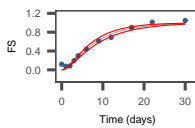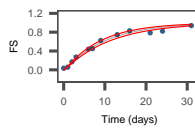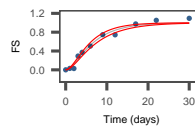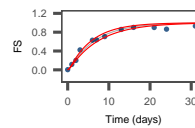

**M2GD – DGLLFGPYESQEK\_2**

**M2GD – VGVLDLSPFGK\_2**

**MAAI – MISDLIASGIQLQLNSVLK\_2**

AA R2: 0.98 k: 0.109 dk: 0.0142

HW R2: 0.95 k: 0.189 dk: 0.0352

AA R2: 0.97 k: 0.136 dk: 0.0216

HW R2: 0.98 k: 0.137 dk: 0.0163

AA R2: 0.97 k: 0.231 dk: 0.046

HW R2: 0.99 k: 0.161 dk: 0.0117

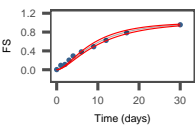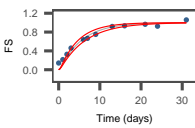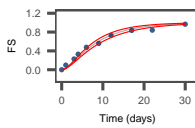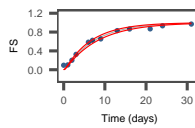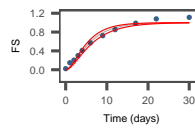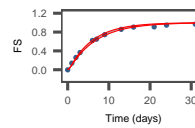

**M2GD – DSTQLLDHLFANVIPK\_2**

**M2GD – YPAPVTSLKPR\_3**

**MAAI – MISDLIASGIQLQLNSVLK\_3**

AA R2: 0.99 k: 0.142 dk: 0.0152

HW R2: 0.96 k: 0.125 dk: 0.026

AA R2: 0.99 k: 0.134 dk: 0.0146

HW R2: 0.92 k: 0.0649 dk: 0.0132

AA R2: 0.98 k: 0.235 dk: 0.039

HW R2: 1 k: 0.161 dk: 0.0104

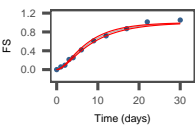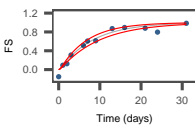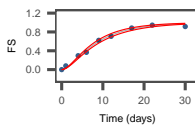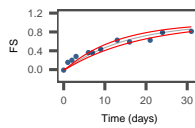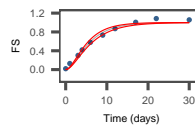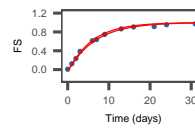

**M2GD – IHFLPLLNMNK\_3**

**MAAI – DGGQQFTEEFQTLNPMK\_2**

**MAAI – QVGOENMQWAQK\_2**

AA R2: 0.99 k: 0.155 dk: 0.0179

HW R2: 0.94 k: 0.102 dk: 0.0199

AA R2: 0.98 k: 0.195 dk: 0.0298

HW R2: 1 k: 0.198 dk: 0.00915

AA R2: 0.98 k: 0.208 dk: 0.0382

HW R2: 0.98 k: 0.258 dk: 0.0312

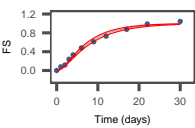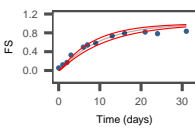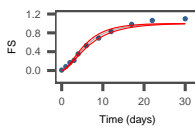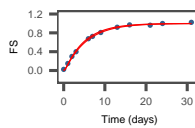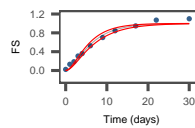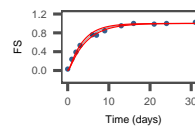

**M2GD – LQASWVTHGVPPFGK\_3**

**MAAI – GIDYEIVPINLK\_2**

**MAAI – VDLSPYPTISHNK\_2**

AA R2: 0.99 k: 0.124 dk: 0.013

HW R2: 0.96 k: 0.106 dk: 0.0192

AA R2: 0.96 k: 0.139 dk: 0.0263

HW R2: 0.99 k: 0.155 dk: 0.012

AA R2: 0.99 k: 0.192 dk: 0.0263

HW R2: 0.95 k: 0.105 dk: 0.0218

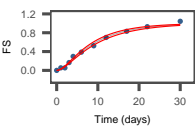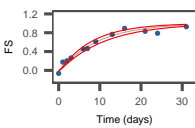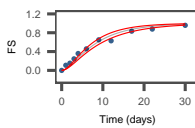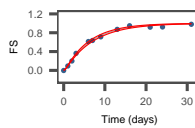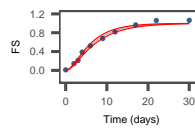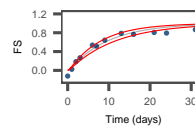

**M2GD – SLAFVYVPVQLSEVGQQVEVLLGK\_3**

**MAAI – LLPQDPQK\_2**

**MAAI – VDLSPYPTISHNK\_3**

AA R2: 0.91 k: 0.262 dk: 0.103

HW R2: 0.99 k: 0.124 dk: 0.0121

AA R2: 0.98 k: 0.189 dk: 0.0284

HW R2: 0.94 k: 0.165 dk: 0.0333

AA R2: 0.96 k: 0.245 dk: 0.0533

HW R2: 0.97 k: 0.143 dk: 0.0197

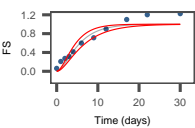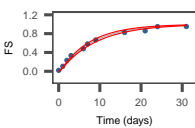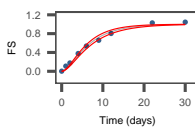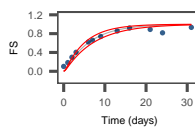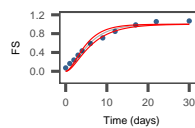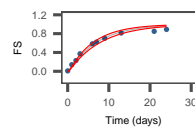





MIC13 – DSWN5GIISVMSALSVAPEK\_3

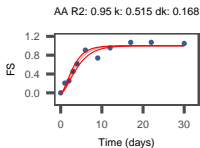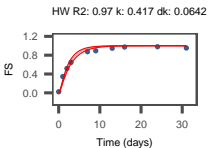

ML12B(Non-Unique) – ATSNVFAMFDQSQIQEFK\_2

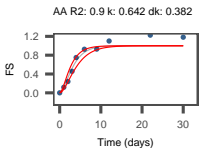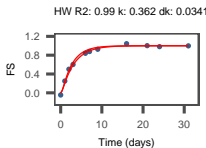

MPCP – AVEEYSCEFGSMK\_2

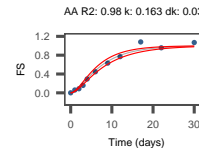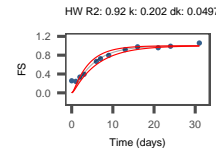

MIC60 – TAMDNSEIAGEK\_2

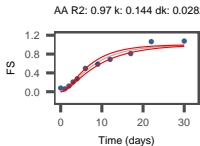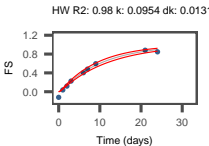

MMSA – AEMDAAVESCK\_2

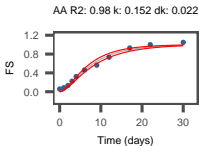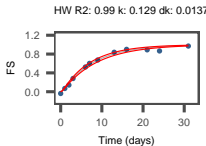

MPCP – EEGLNAFYK\_2

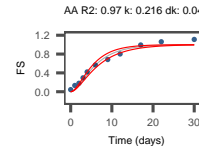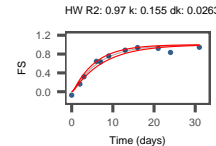

MIC60 – TSSVTLQTITAGNAAVQAVK\_2

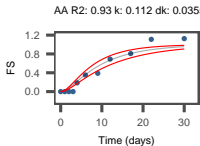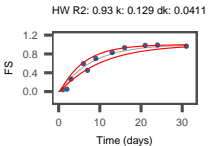

MMSA – EEIFGPVLVLELETETLDEAIK\_2

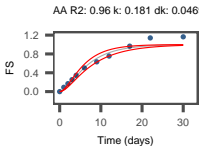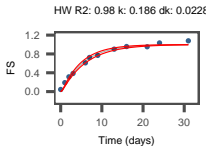

MPU1 – GLLVPIILLPEK\_2

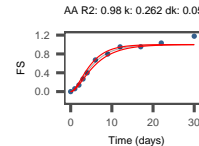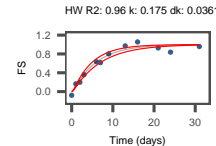

MIC60 – YSTSSSSGLTAGK\_2

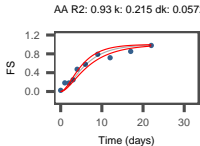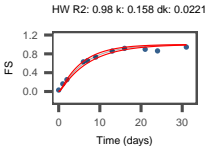

MMSA – EEIFGPVLVLELETETLDEAIK\_3

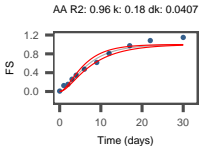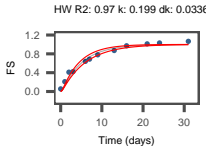

MRP6 – SLLSALLGELLK\_2

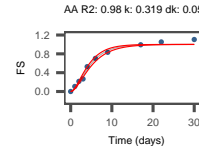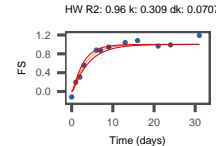

MIF – ASVPEGFLSELTQLAQATGK\_2

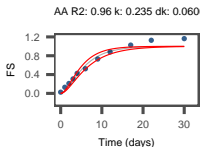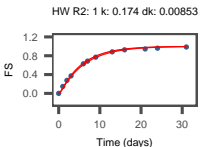

MMSA – LITLEQGK\_2

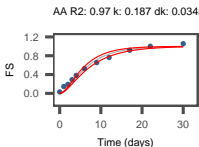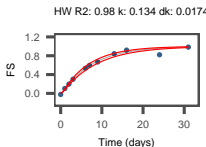

MSRA – EQGVFYAEDYHQYLSK\_3

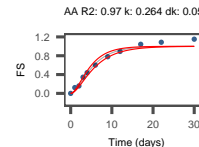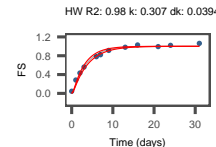

MIF – ASVPEGFLSELTQLAQATGK\_3

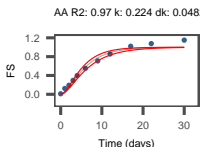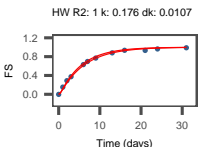

MMSA – VNAGDQPGADGLLTPQAK\_2

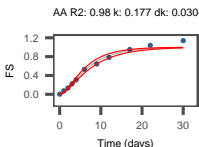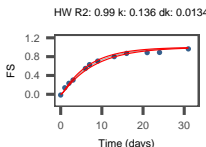

MTL26 – NKEPILSVLR\_2

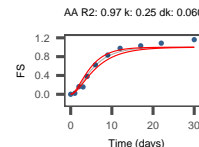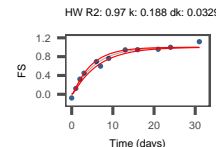

**MTP - MLSASGDPVSVVK\_2**

**MYDGF - SYLYFTQFK\_2**

**NCPR - TYEHFNAMEGK\_3**

AA R2: 0.97 k: 0.378 dk: 0.0826

HW R2: 0.94 k: 0.208 dk: 0.0434

AA R2: 0.97 k: 0.306 dk: 0.0776

HW R2: 0.93 k: 0.341 dk: 0.099

AA R2: 0.97 k: 0.632 dk: 0.16

HW R2: 0.95 k: 0.279 dk: 0.0604

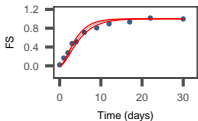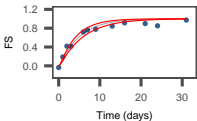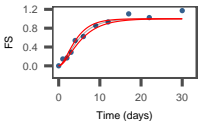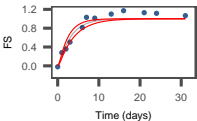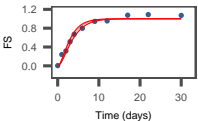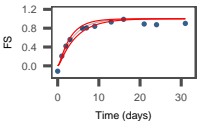

**MTP - NALLPEGIPLLLK\_2**

**MYH11(Non-Unique) - EDQSILCTGEGSAGK\_2**

**NDKA - FLQASEDLLK\_2**

AA R2: 0.98 k: 0.321 dk: 0.0513

HW R2: 0.98 k: 0.206 dk: 0.0245

AA R2: 0.98 k: 0.248 dk: 0.0475

HW R2: 0.95 k: 0.279 dk: 0.0608

AA R2: 0.97 k: 0.237 dk: 0.0404

HW R2: 0.99 k: 0.333 dk: 0.0342

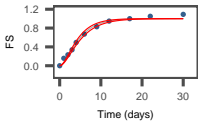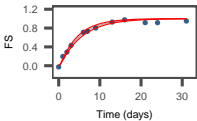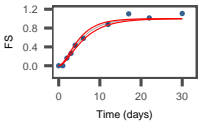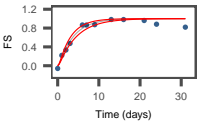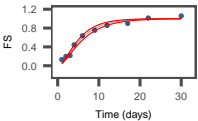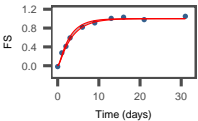

**MTP - NILLSIGLPK\_2**

**MYH11(Non-Unique) - NTDQASMPDNTAAQK\_2**

**NDKA(Non-Unique) - TFAIKPDGVQR\_2**

AA R2: 0.99 k: 0.178 dk: 0.0219

HW R2: 0.97 k: 0.169 dk: 0.0257

AA R2: 0.99 k: 0.274 dk: 0.0392

HW R2: 0.99 k: 0.309 dk: 0.0245

AA R2: 0.99 k: 0.249 dk: 0.0346

HW R2: 0.99 k: 0.188 dk: 0.0188

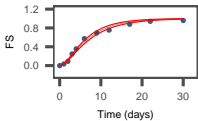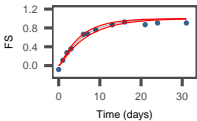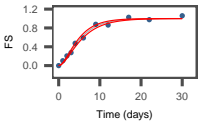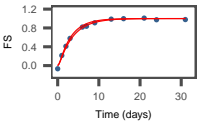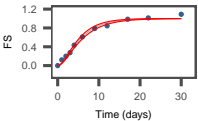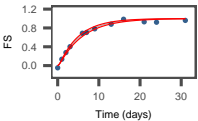

**MTP - YMLTVQDILHFEMPASK\_3**

**MYL6 - VLDFEHFLPMLQTVAK\_3**

**NDKA(Non-Unique) - TFAIKPDGVQR\_3**

AA R2: 0.97 k: 0.369 dk: 0.0887

HW R2: 0.99 k: 0.272 dk: 0.0219

AA R2: 0.96 k: 0.827 dk: 0.267

HW R2: 0.94 k: 0.783 dk: 0.159

AA R2: 0.98 k: 0.263 dk: 0.0424

HW R2: 0.99 k: 0.209 dk: 0.0189

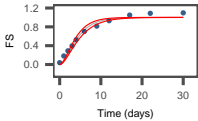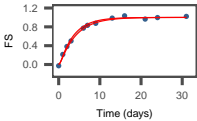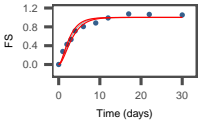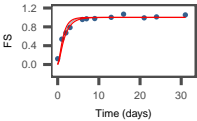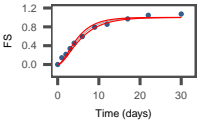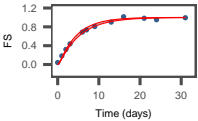

**MTX2 - VPFIVHQNVVSELPQVQVK\_3**

**NACAM(Non-Unique) - IEDLSQQAALAAEK\_2**

**NDKA(Non-Unique) - VMLGETNPADSKPGTIR\_3**

AA R2: 0.98 k: 0.189 dk: 0.0369

HW R2: 0.98 k: 0.204 dk: 0.032

AA R2: 0.96 k: 0.287 dk: 0.0698

HW R2: 0.98 k: 0.316 dk: 0.045

AA R2: 0.98 k: 0.276 dk: 0.0487

HW R2: 0.98 k: 0.197 dk: 0.0256

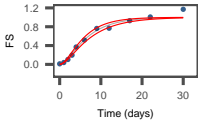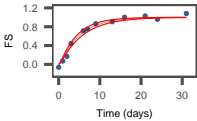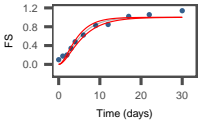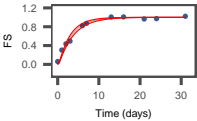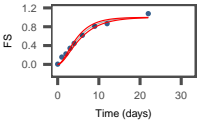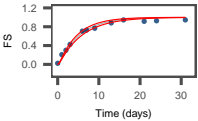

**MVP - QAIPLDQNEGIYQDVK\_2**

**NCPR - FAVFGLGNK\_2**

**NDKA - YMHSQPPVAMVWEGLNVVK\_3**

AA R2: 0.9 k: 0.18 dk: 0.0754

HW R2: 0.98 k: 0.274 dk: 0.045

AA R2: 0.97 k: 0.572 dk: 0.133

HW R2: 0.92 k: 0.25 dk: 0.0707

AA R2: 0.96 k: 0.292 dk: 0.0695

HW R2: 0.99 k: 0.214 dk: 0.0175

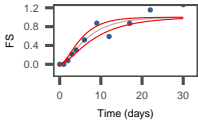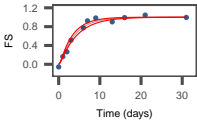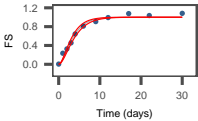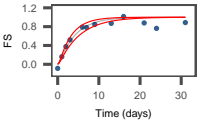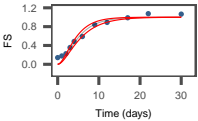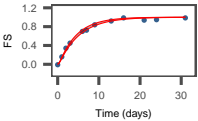

**NDKB – DRPFPPGLVK\_2**

**NDUA4 – LGPNEYQK\_2**

**NDUS2 – IRPGGVHQLPLGLLLDDIYFSK\_4**

AA R2: 0.98 k: 0.255 dk: 0.0436

HW R2: 0.97 k: 0.192 dk: 0.0322

AA R2: 0.98 k: 0.363 dk: 0.0669

HW R2: 0.96 k: 0.218 dk: 0.0418

AA R2: 0.94 k: 0.133 dk: 0.0371

HW R2: 0.98 k: 0.186 dk: 0.0207

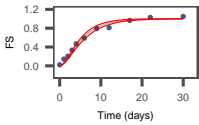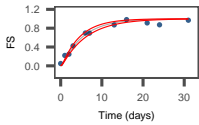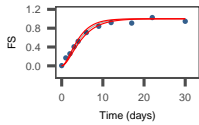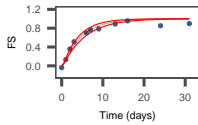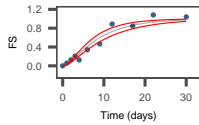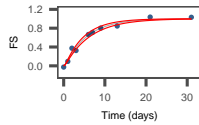

**NDKB – DRPFPPGLVK\_3**

**NDUA4 – YGLLAAILGDK\_2**

**NDUS2 – TSMESLIHFFK\_3**

AA R2: 0.97 k: 0.278 dk: 0.0555

HW R2: 0.98 k: 0.163 dk: 0.0224

AA R2: 0.99 k: 0.225 dk: 0.0271

HW R2: 0.99 k: 0.17 dk: 0.0171

AA R2: 0.92 k: 0.204 dk: 0.0619

HW R2: 0.97 k: 0.13 dk: 0.0206

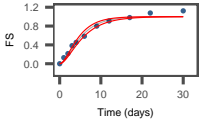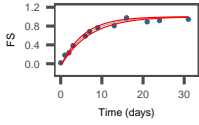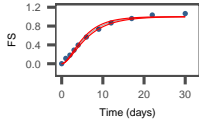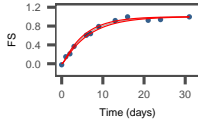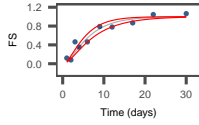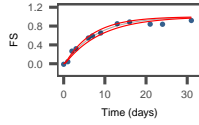

**NDRG2 – GWMDWAHK\_3**

**NDUAD – IALMPLFAEK\_2**

**NDUS6 – IICDGGGGALGHPK\_2**

AA R2: 0.96 k: 1.52 dk: 0.666

HW R2: 0.92 k: 0.54 dk: 0.136

AA R2: 0.97 k: 0.183 dk: 0.0368

HW R2: 0.97 k: 0.123 dk: 0.0183

AA R2: 0.96 k: 0.281 dk: 0.0696

HW R2: 0.99 k: 0.232 dk: 0.026

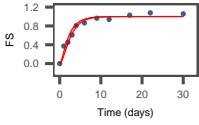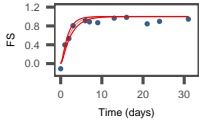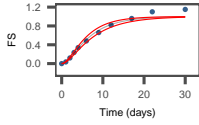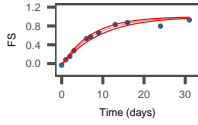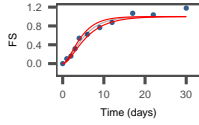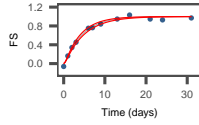

**NDRG2 – IILDQGGTHSVETPYGVSFTFYVGTPK\_3**

**NDUB3 – IEGTPLETVQK\_2**

**NDUS6 – ITHTQQVYDEK\_2**

AA R2: 0.92 k: 0.847 dk: 0.488

HW R2: 0.93 k: 1.58 dk: 0.393

AA R2: 0.98 k: 0.139 dk: 0.0215

HW R2: 0.99 k: 0.151 dk: 0.0159

AA R2: 0.98 k: 0.35 dk: 0.0687

HW R2: 0.98 k: 0.294 dk: 0.0416

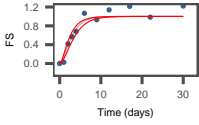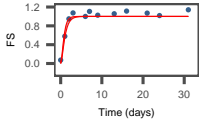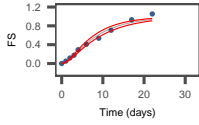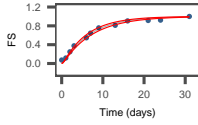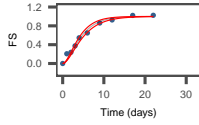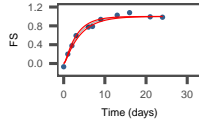

**NDRG2 – MADSGGQPQLTPGK\_2**

**NDUS1 – FAYDGLK\_2**

**NDUS6 – ITHTQQVYDEK\_3**

AA R2: 0.97 k: 1.45 dk: 0.506

HW R2: 0.95 k: 0.787 dk: 0.188

AA R2: 0.97 k: 0.161 dk: 0.0241

HW R2: 0.9 k: 0.113 dk: 0.0357

AA R2: 0.94 k: 0.611 dk: 0.218

HW R2: 0.98 k: 0.334 dk: 0.0539

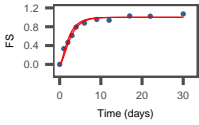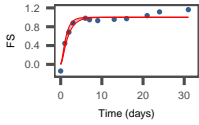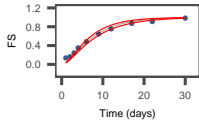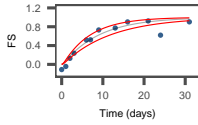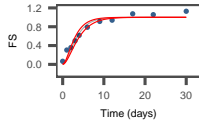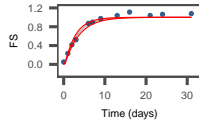

**NDUA4 – FYSVNVDSK\_2**

**NDUS1 – FMFSELGNVIDICPVGALTSK\_2**

**NDU1 – GPDWILGEMK\_2**

AA R2: 0.95 k: 0.782 dk: 0.265

HW R2: 0.93 k: 0.347 dk: 0.0862

AA R2: 0.95 k: 0.168 dk: 0.0481

HW R2: 0.94 k: 0.16 dk: 0.0449

AA R2: 0.91 k: 0.339 dk: 0.118

HW R2: 0.92 k: 0.0947 dk: 0.0245

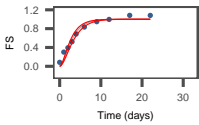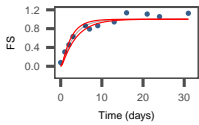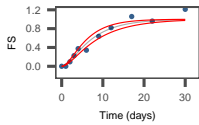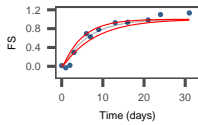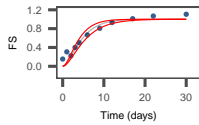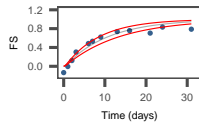



**NDUV1 – HAGVGTGGWDLNLAVIPGGSTLPIK\_3**

AA R2: 0.97 k: 0.254 dk: 0.0495

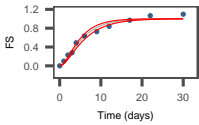

HW R2: 0.99 k: 0.162 dk: 0.0168

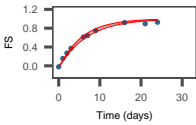

**NIT2 – ASYVAWGHSVVDPPWQVLTk\_2**

AA R2: 0.93 k: 0.141 dk: 0.0468

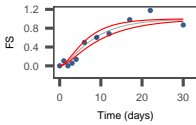

HW R2: 0.95 k: 0.175 dk: 0.04

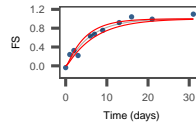

**NNRE – GNPSGIQDLLISLTAPK\_2**

AA R2: 0.99 k: 0.142 dk: 0.0142

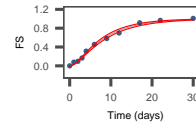

HW R2: 0.96 k: 0.109 dk: 0.0194

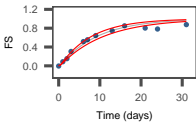

**NDUV1 – YLVVNADEGEPTCK\_2**

AA R2: 0.99 k: 0.232 dk: 0.0321

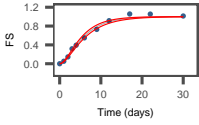

HW R2: 0.99 k: 0.208 dk: 0.0249

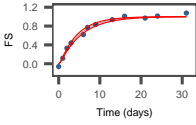

**NIT2 – ASYVAWGHSVVDPPWQVLTk\_3**

AA R2: 0.93 k: 0.228 dk: 0.0661

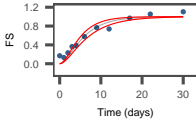

HW R2: 0.97 k: 0.216 dk: 0.0337

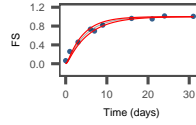

**NNTM – ILIVGGVAGLASAGAAK\_2**

AA R2: 0.98 k: 0.106 dk: 0.0147

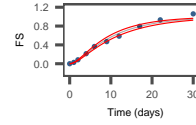

HW R2: 0.99 k: 0.122 dk: 0.0107

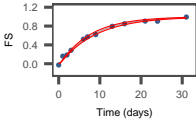

**NDUV2 – DIEEIDELK\_2**

AA R2: 0.98 k: 0.167 dk: 0.0239

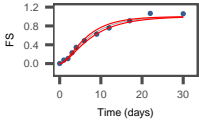

HW R2: 0.96 k: 0.179 dk: 0.0354

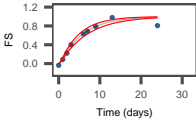

**NIT2 – IHLFDIDVPGK\_3**

AA R2: 0.99 k: 0.155 dk: 0.0179

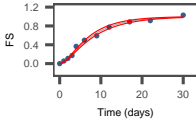

HW R2: 0.98 k: 0.122 dk: 0.016

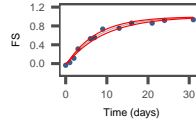

**NPM – VTLATLK\_2**

AA R2: 0.97 k: 0.322 dk: 0.0673

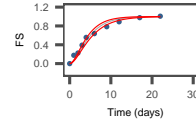

HW R2: 0.95 k: 0.144 dk: 0.032

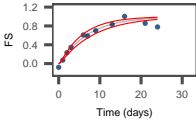

**NDUV2 – FCCEPAGGLTSLTEPPK\_2**

AA R2: 0.9 k: 0.178 dk: 0.0645

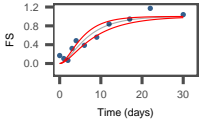

HW R2: 0.9 k: 0.251 dk: 0.0705

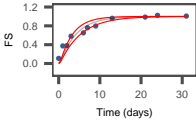

**NIT2 – LYNTCSVFGPDGSLLVK\_2**

AA R2: 0.99 k: 0.134 dk: 0.0153

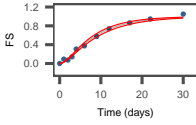

HW R2: 0.99 k: 0.136 dk: 0.0164

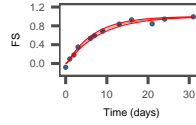

**NQO2 – GFAFDIPGFYDSGFLK\_2**

AA R2: 0.99 k: 0.208 dk: 0.0282

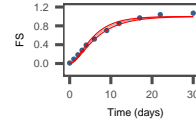

HW R2: 1 k: 0.174 dk: 0.0114

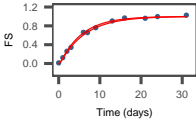

**NIPS1 – FSGGYPALMDCMNK\_2**

AA R2: 0.99 k: 0.142 dk: 0.0164

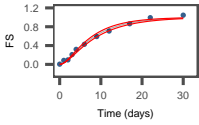

HW R2: 0.99 k: 0.106 dk: 0.0109

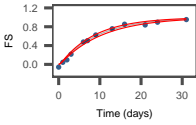

**NIT2 – TILSPGDSFSTFDTPYCK\_2**

AA R2: 0.99 k: 0.145 dk: 0.0195

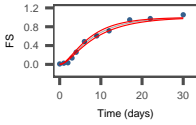

HW R2: 1 k: 0.158 dk: 0.0109

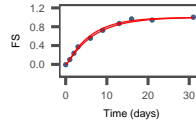

**NQO2\_HUMAN,sp|Q9J175|NQO2(Non-Unique) – VLIVYAHQEPK\_2**

AA R2: 0.97 k: 0.136 dk: 0.0256

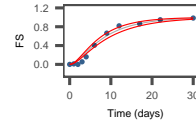

HW R2: 0.93 k: 0.196 dk: 0.0472

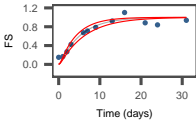

**NIPS1 – LKPGTMIEWGNWAR\_2**

AA R2: 0.98 k: 0.145 dk: 0.0234

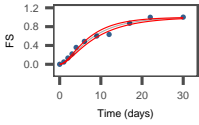

HW R2: 0.97 k: 0.0907 dk: 0.017

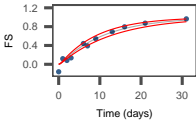

**NNRD – LSQLGNITVQVK\_2**

AA R2: 0.98 k: 0.154 dk: 0.0268

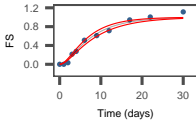

HW R2: 0.98 k: 0.191 dk: 0.0254

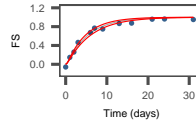

**NQO2\_HUMAN,sp|Q9J175|NQO2(Non-Unique) – VLIVYAHQEPK\_3**

AA R2: 0.99 k: 0.172 dk: 0.0227

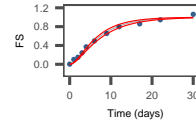

HW R2: 0.99 k: 0.161 dk: 0.0161

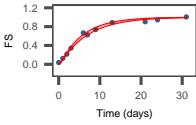

NT8F2 - SLQADLADTK\_2

OAT - QYDFLSAYGAVSQGHCHPK\_3

ODBA - QYLLNQGWWDDEQEK\_2

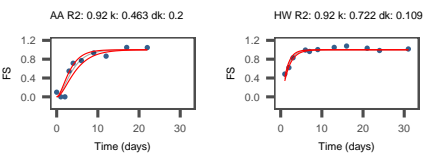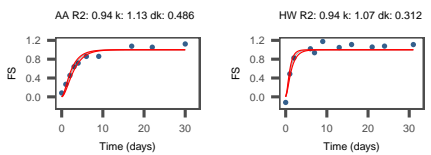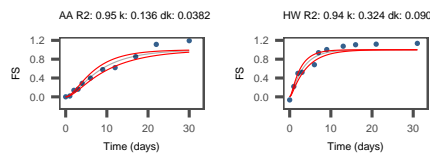

NU4M - AHVEAPIAGSMILAAILLK\_3

ODB2 - EDILSFLEK\_2

ODBB - MNLFSITSALDNSLAK\_3

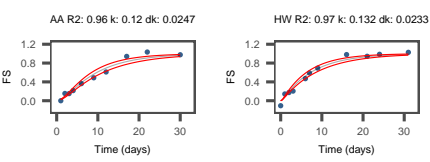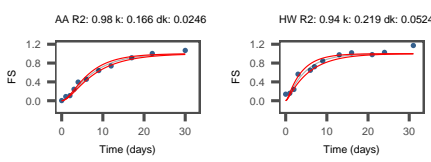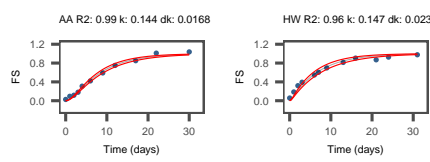

NU5M - TSLTLLDLIWLEK\_2

ODB2 - PVILPPEVAIGALGAIK\_3

ODO1 - HHVLHQNVDKR\_3

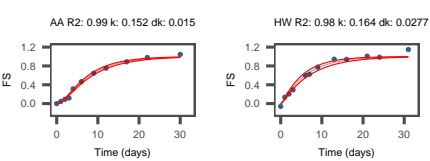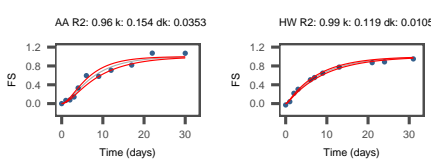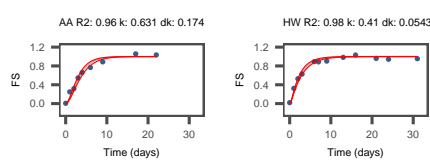

NUDT7 - DFIMHCFEYK\_3

ODBA - DYPLELFMSQCYGNVNDPGK\_2

ODO1 - HHVLHQNVDKR\_4

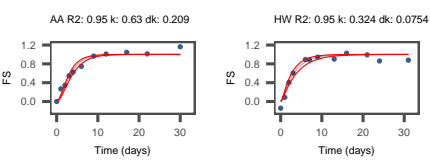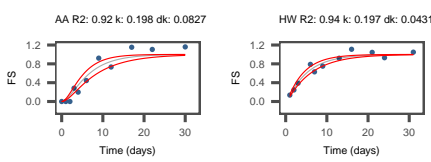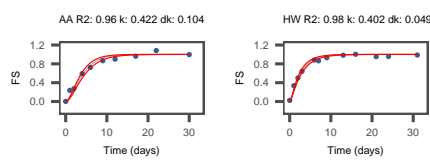

NUDT7 - EPGEVCFPGK\_2

ODBA - MSQCYGNVNDPGK\_2

ODO1 - IEQLSPFFDLKK\_2

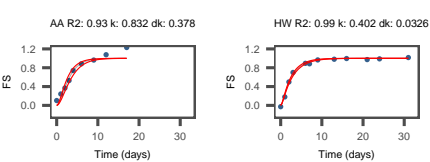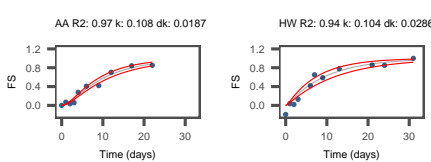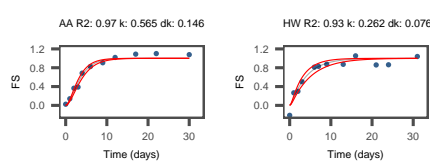

NUDT8 - VWGLTAVITELTK\_2

ODBA - QMPVHYGCK\_3

ODO1 - LEAEDSGDMK\_2

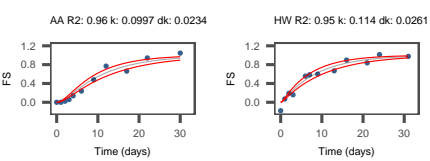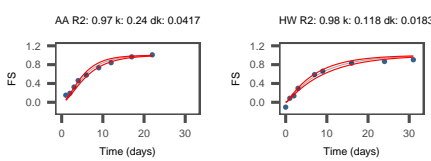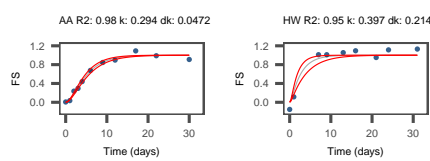

**ODD1 – TVDWALAEYMAFGSLK\_2**

**OLA1 – IGIVGLPNVGK\_2**

**OSTF1 – GYADIVQLLLAK\_2**

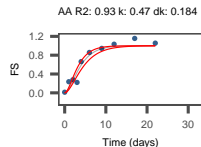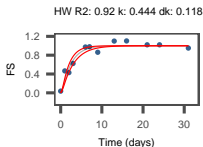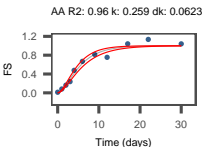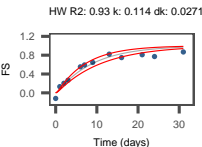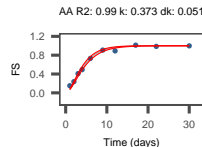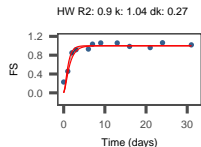

**ODP2 – DVPLGAPLCIIVEK\_2**

**OLA1 – IPAFNLVVDIAGLVK\_2**

**OTC – FGMHLQAATPK\_3**

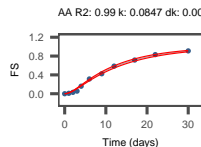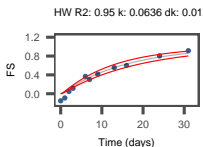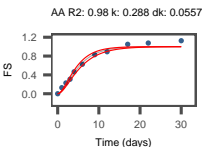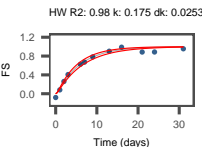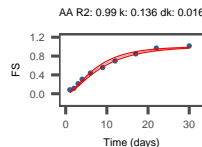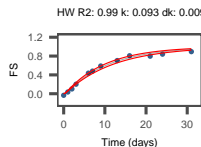

**ODP2 – ISVNDFIK\_2**

**OLA1 – IPAFNLVVDIAGLVK\_3**

**OTC – GEYLLPLQ GK\_2**

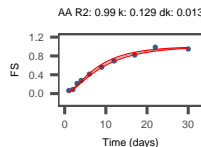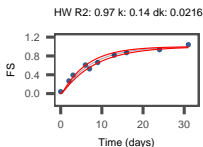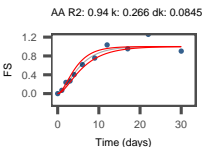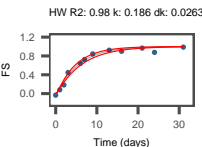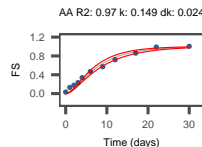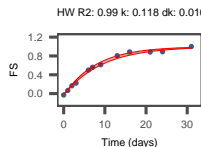

**ODP2 – LQPHEFGGFTTISNLGMFGIK\_3**

**OPLA – DIPLNQGLAPVQVIIPK\_2**

**OTC – GGNVLITDTWISMGQEDEK\_2**

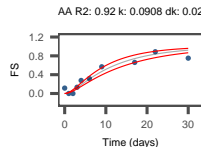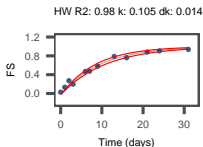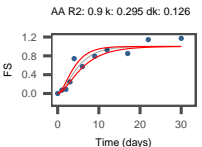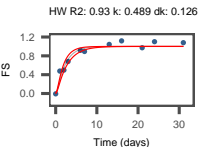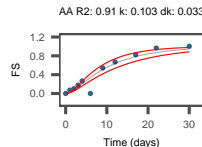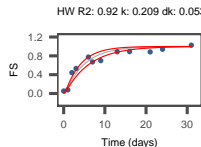

**ODPB – DIIFAVK\_2**

**ORNT1 – IAASQNTVWSVK\_2**

**OTC – GYEPDPNIVK\_2**

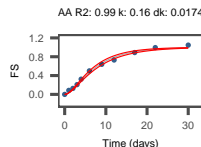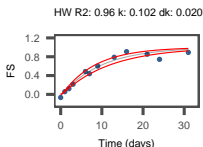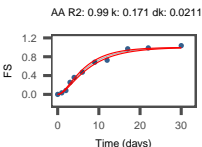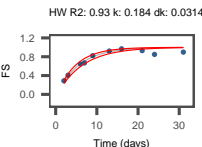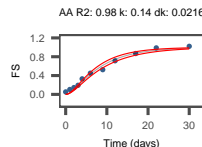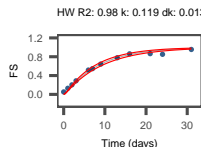

**ODPB – VLEDNSVPQVK\_2**

**ORNT1 – NEGITALYSGLKPTMIR\_3**

**OTC – KPVEVDDEVFYSR\_2**

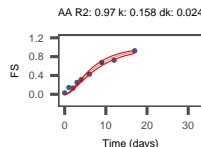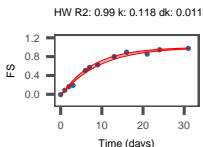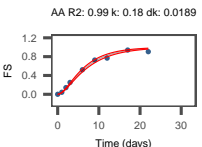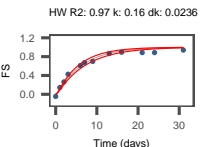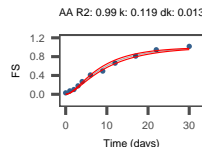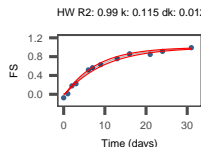



PCKGC – EIISFGSGYGGNSLLGK\_2

PDIA1 – MDSTANEVAVK\_2

PDIA3 – GFPTIYFSPANK\_2

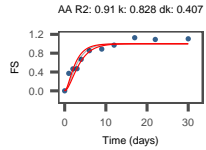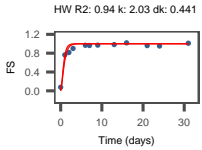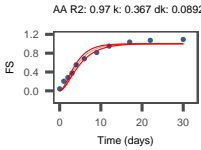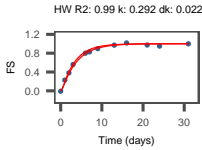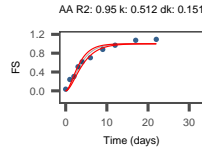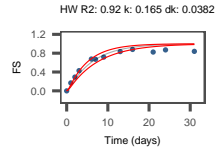

PCKGC – GLGGVNEELFGISK\_2

PDIA1 – NNFEGETK\_2

PDIA3 – MDATANVPSPYEVK\_2

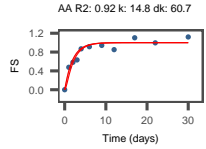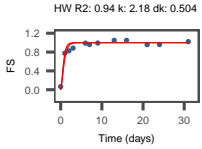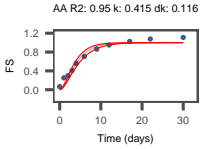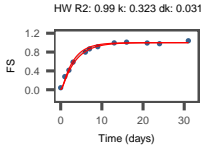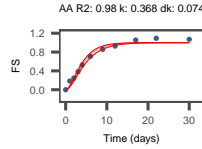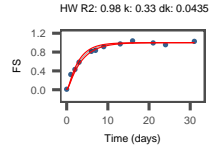

PCY2 – YVSEVIGAPYSVTAELLNHFK\_3

PDIA1 – SNFEELAANK\_3

PDIA3 – SEPIPESNEGPVK\_2

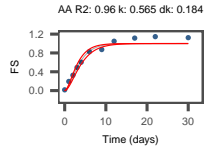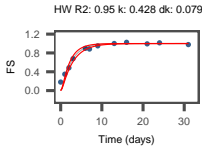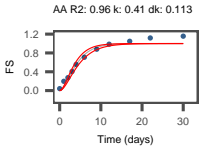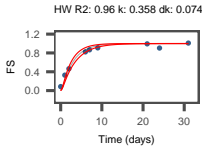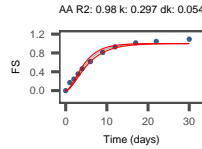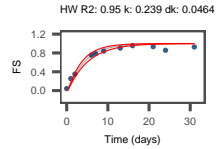

PDIA1 – DGVVLFK\_2

PDIA1 – THILLFLPK\_2

PDIA4 – EVSQPDWTPPEVTLSLTK\_2

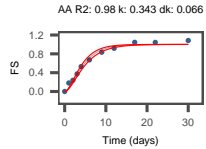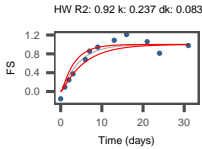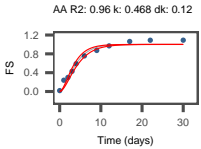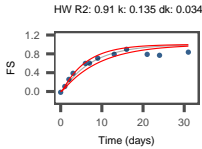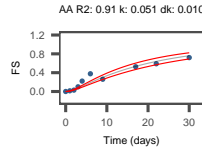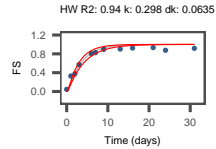

PDIA1 – DHENIIAK\_2

PDIA1 – THILLFLPK\_3

PDIA5 – FLFPYENYGSTAEDIVELWK\_2

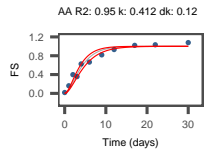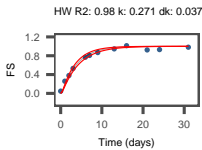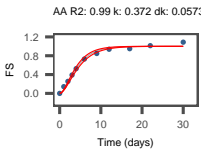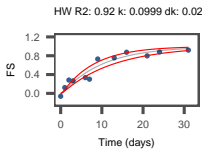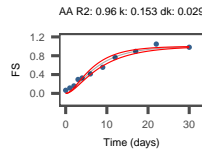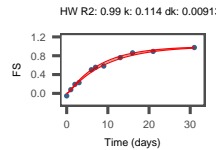

PDIA1 – HNQLPLVIEFTQAPK\_3

PDIA3 – DLFSGDHSEFLK\_3

PDIA6 – HQLSGGQYGVGFPTIK\_2

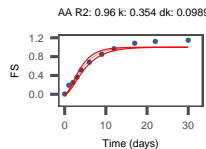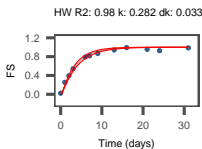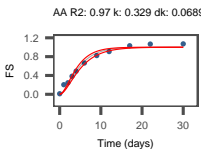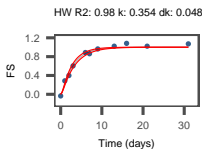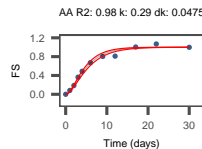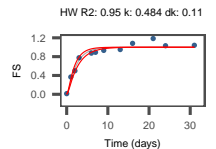

**PDIA6 – NLEPEWAAAATEVK\_2**

**PECR – SIPDHDNVPVPGAGDLSIVK\_3**

**PGK1 – AHSSMVGVLNLPQK\_3**

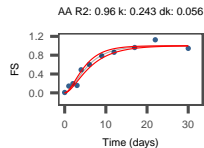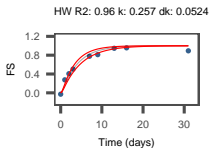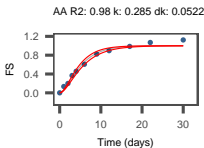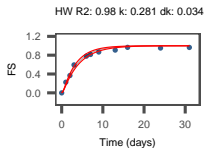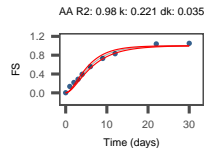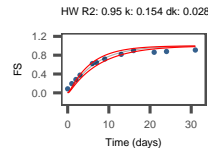

**PDIA6 – NSYLEVLLK\_2**

**PGAM1 – FSGWYDADLSPAGHEEA\_3**

**PGK1 – ALESPERPFILGGA\_2**

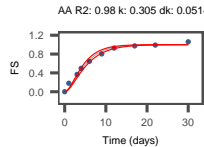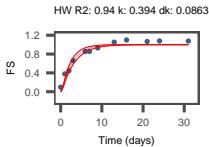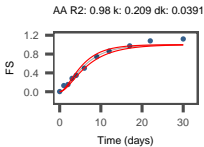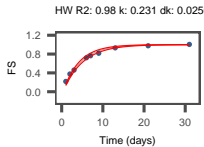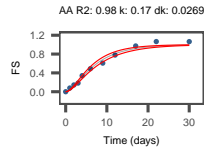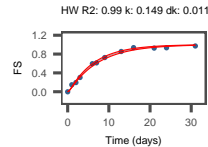

**PDXK – SQELHELYEGLK\_2**

**PGAM1 – SYDVPPPPMEPDHPFYSNISK\_3**

**PGK1 – ALESPERPFILGGA\_3**

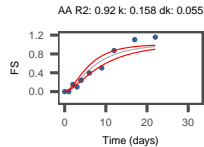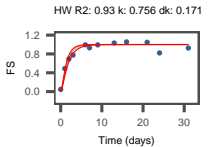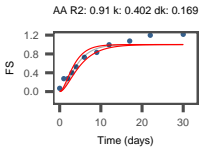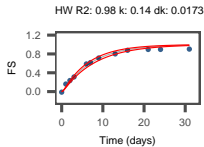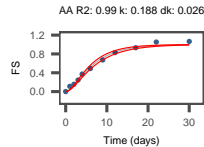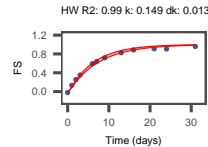

**PEBP1(Non-Unique) – EWHHFLVNMK\_3**

**PGAM1 – YADLTEDQLPSCESLK\_2**

**PGK1 – GCITIGGDTATCCA\_2**

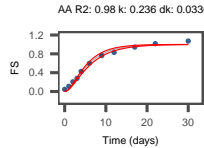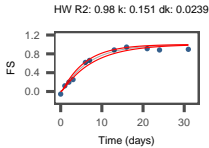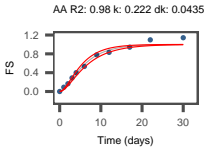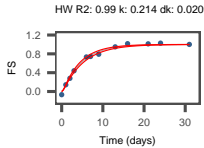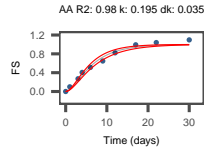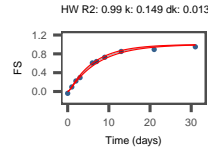

**PEBP1 – YVWLVEQEQLPSCDEPILSNK\_2**

**PGAM2(Non-Unique) – HYGGLTGLNK\_2**

**PGK1 – SLMDEVVK\_2**

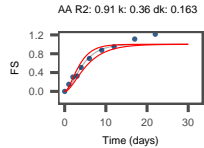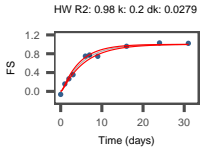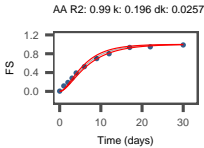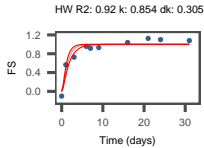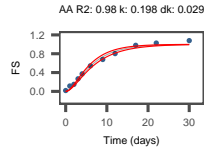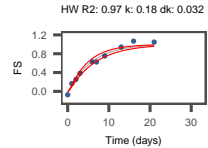

**PEBP1 – YVWLVEQEQLPSCDEPILSNK\_3**

**PGK1 – AHSSMVGVLNLPQK\_2**

**PGK1 – SVLMSHLGRPDGVPMPDK\_3**

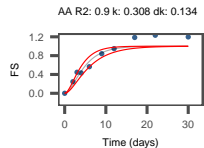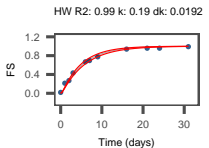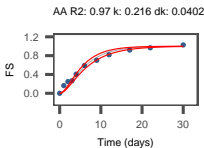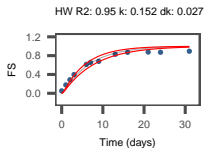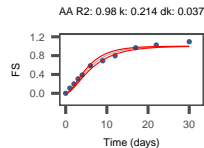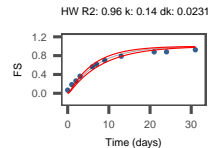



PHB2 – IVQAEGEAEAAK\_2

PLST – WANFHLENSGWQK\_3

PPIB – VVFGFLGK\_2

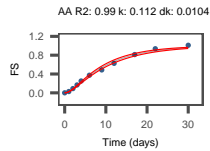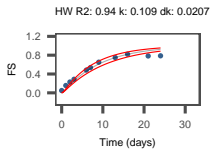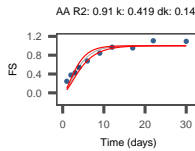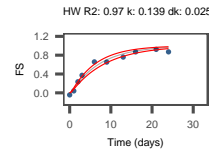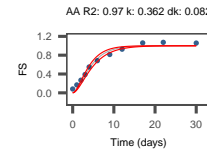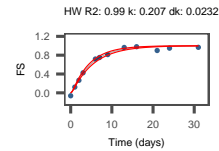

PHS – LDHHPWFVFNKYK\_2

PLST – YPALTKPENQDIDWTLLEGETR\_3

PPID – IVLELFADIVPK\_2

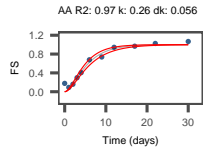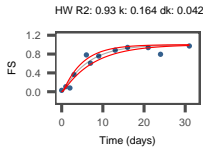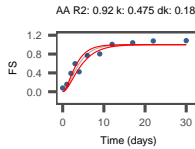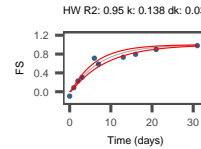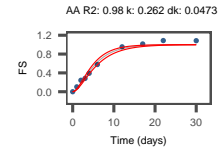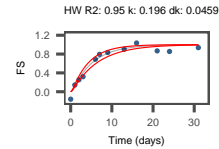

PHS – LDHHPWFVFNKYK\_4

PNCB – GSEVNVIGIGTSVTCPK\_2

PRDX1(Non-Unique) – ATAVMPDGQFK\_2

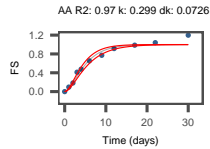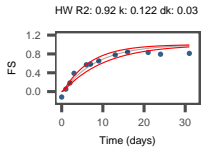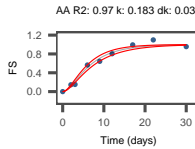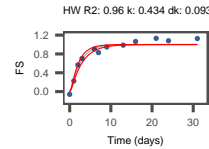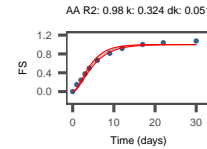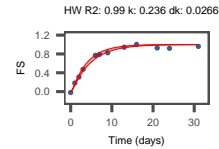

PICAL – ITAAQHSVTGSVASK\_2

PNCB – GTQEPCTVKPAQVEPLLR\_3

PRDX1 – DISLSEYK\_2

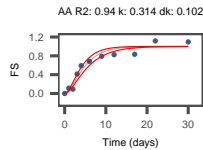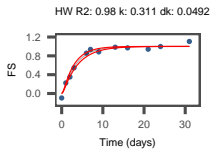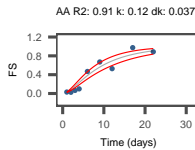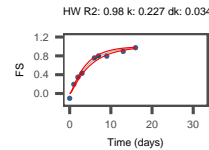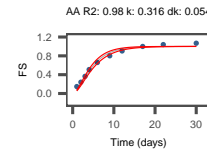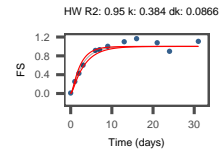

PLCB – TAMSVADLGDLMVK\_2

PNCB – QLQSPAVYPVALSEK\_2

PRDX1 – LNCQVIGASVDSHFCHLAWINTPK\_2

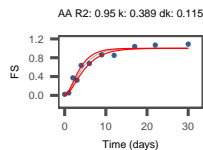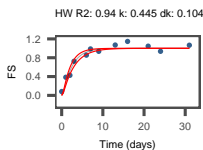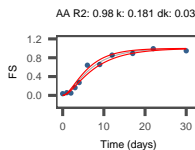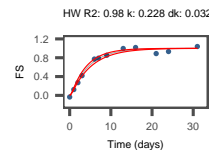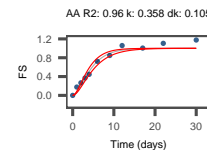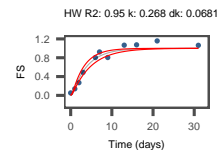

PLPHP – HGLLPSETIAVVEHIK\_3

PPIA(Non-Unique) – FEDENFILK\_2

PRDX1(Non-Unique) – LVQAFQFTDK\_2

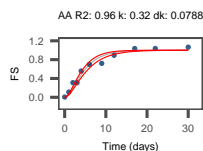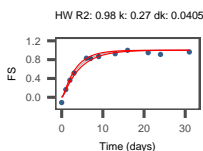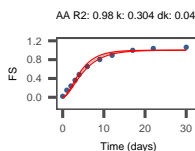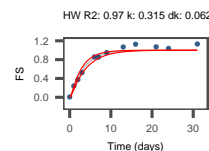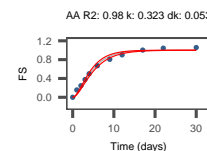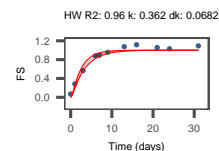



PRDX1(Non-Unique) – TIAQDYGLK\_2

PRDX5 – VNLAEFLK\_2

PRDX6 – LPFPIIDK\_2

AA R2: 0.98 k: 0.304 dk: 0.0536

HW R2: 0.93 k: 0.27 dk: 0.0783

AA R2: 0.99 k: 0.196 dk: 0.0248

HW R2: 0.98 k: 0.193 dk: 0.0274

AA R2: 0.95 k: 0.308 dk: 0.0818

HW R2: 0.97 k: 0.169 dk: 0.0287

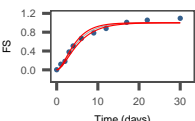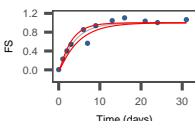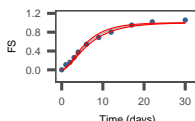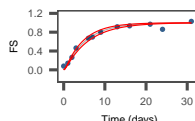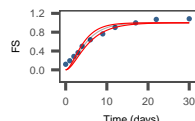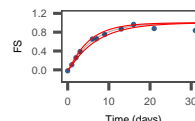

PRDX2 – EGGLGPLNPLLADVTK\_2

PRDX6 – DLAILLGMLDPVEK\_2

PRDX6 – VVFIQDPK\_2

AA R2: 0.98 k: 0.179 dk: 0.0263

HW R2: 0.97 k: 0.171 dk: 0.0274

AA R2: 0.99 k: 0.178 dk: 0.0174

HW R2: 0.94 k: 0.145 dk: 0.0425

AA R2: 0.98 k: 0.236 dk: 0.0344

HW R2: 0.94 k: 0.186 dk: 0.0472

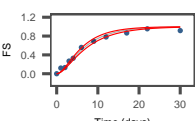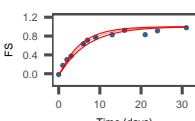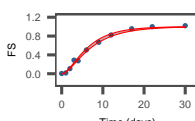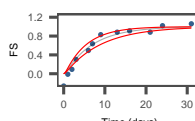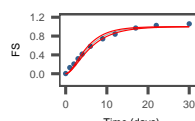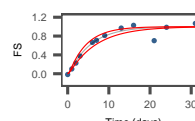

PRDX2 – GLFIIDAK\_2

PRDX6 – DLAILLGMLDPVEK\_3

PROF1 – TFVSITPAEYGLVGK\_2

AA R2: 0.96 k: 0.205 dk: 0.0429

HW R2: 0.96 k: 0.157 dk: 0.0304

AA R2: 0.95 k: 0.23 dk: 0.057

HW R2: 0.99 k: 0.205 dk: 0.0198

AA R2: 0.98 k: 0.354 dk: 0.063

HW R2: 0.99 k: 0.203 dk: 0.0243

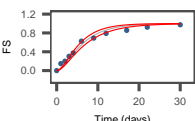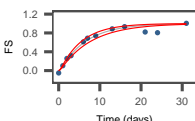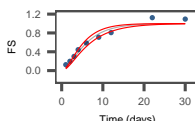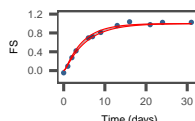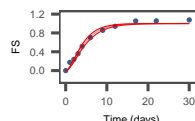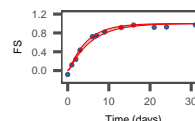

PRDX5 – GVLFGVPGAFTPGCSK\_2

PRDX6 – LAPEFAK\_2

PSA2 – LVQIEYALAAVAGAPSVGIK\_2

AA R2: 0.92 k: 0.17 dk: 0.0436

HW R2: 0.99 k: 0.128 dk: 0.0148

AA R2: 0.98 k: 0.246 dk: 0.0424

HW R2: 0.94 k: 0.211 dk: 0.044

AA R2: 0.96 k: 0.177 dk: 0.0408

HW R2: 0.98 k: 0.265 dk: 0.037

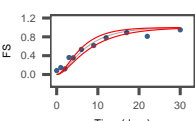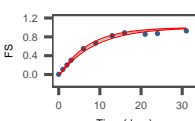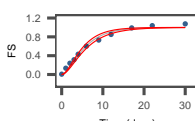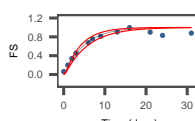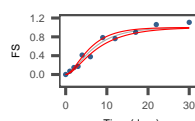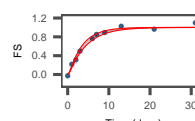

PRDX5 – LLADPTGAFGK\_2

PRDX6 – LIALSIDSVEDHLAWSK\_2

PSA2 – LVQIEYALAAVAGAPSVGIK\_3

AA R2: 0.93 k: 0.089 dk: 0.0192

HW R2: 0.98 k: 0.173 dk: 0.0237

AA R2: 0.98 k: 0.208 dk: 0.0326

HW R2: 0.99 k: 0.227 dk: 0.0205

AA R2: 0.97 k: 0.192 dk: 0.0371

HW R2: 0.98 k: 0.214 dk: 0.0304

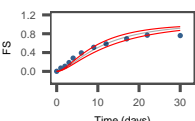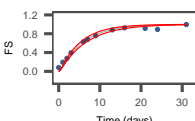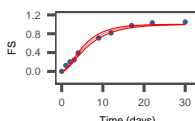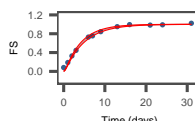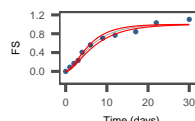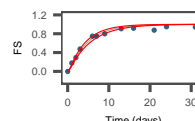

PRDX5 – THLPGFVEQAGALK\_3

PRDX6 – LIALSIDSVEDHLAWSK\_3

PSA6 – CDPAGYCGFK\_2

AA R2: 0.96 k: 0.176 dk: 0.0443

HW R2: 0.98 k: 0.178 dk: 0.0241

AA R2: 0.97 k: 0.219 dk: 0.0471

HW R2: 1 k: 0.204 dk: 0.0125

AA R2: 0.94 k: 0.154 dk: 0.0506

HW R2: 0.95 k: 0.168 dk: 0.0404

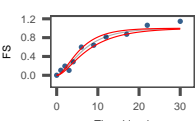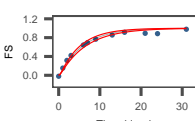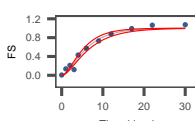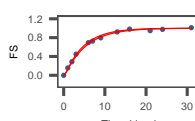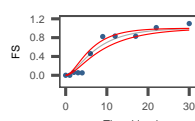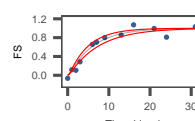

**PSB4 – TQNPMVTGTSVLGVK\_2**

**PURA – FFFDVGSNK\_2**

**PYC – HGEEVTPEDVLASAMYPDVFAQFK\_3**

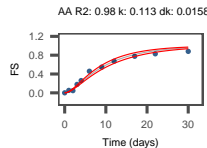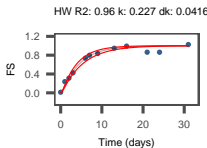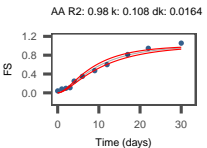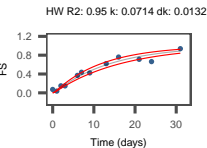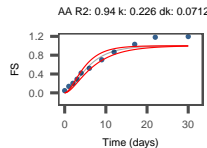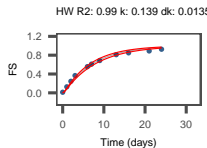

**PSB5 – ATAGAYIASQTVK\_2**

**PXMP2 – ALAQYLLLLK\_2**

**PYC – IAPYVAHFNK\_2**

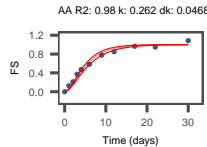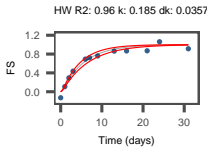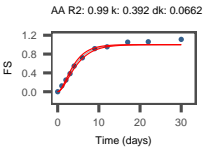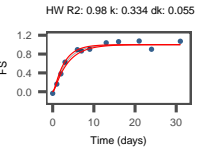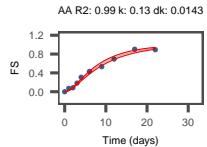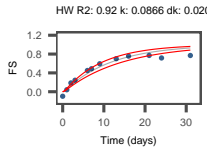

**PSD11 – ALLVEVQLLESK\_2**

**PXMP2 – AVSSGILSALGNLLAQTIK\_2**

**PYC – PGASLPPLNLK\_2**

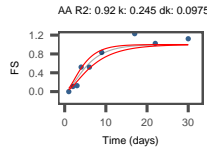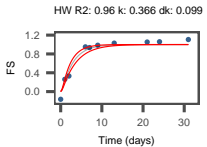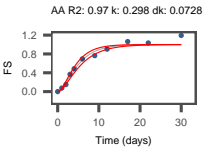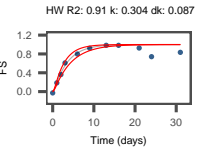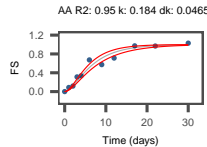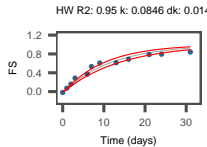

**PSMD2 – LAQLHLGK\_2**

**PXMP2 – AVSSGILSALGNLLAQTIK\_3**

**PYC – QVGYENAGTVEFLVDK\_2**

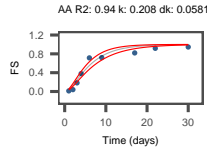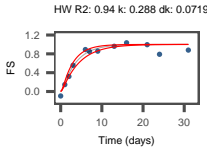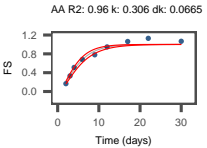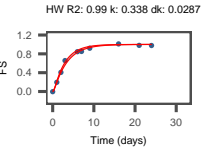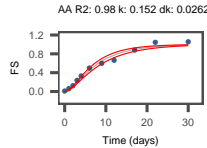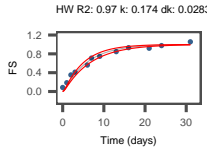

**PTBP1 – IIVENFYPTLVLDVHLQIFSK\_3**

**PYC – GLAPVQAYLHIPDIK\_2**

**PYGB(Non-Unique) – VLYPNDNFFEGK\_2**

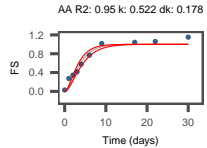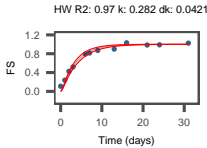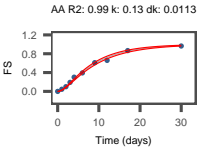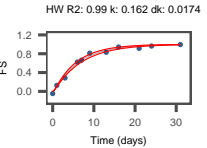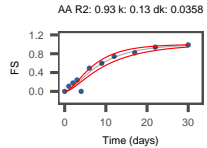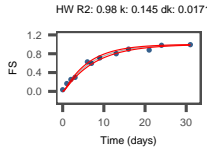

**PTH2 – APDEDTLIQLLTHAK\_3**

**PYC – GLAPVQAYLHIPDIK\_3**

**PYGL – HLEIYEINQK\_2**

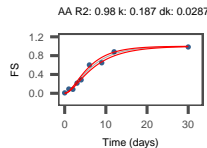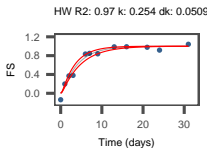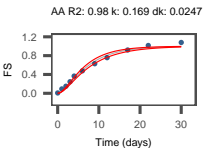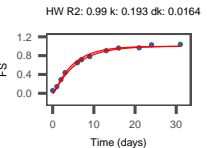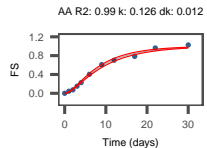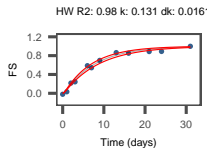

**PYGL – HLEIYEINQK\_3**

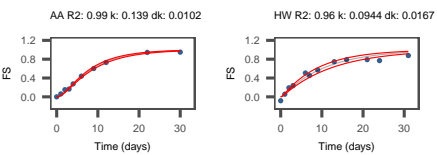

**PYGL – VIPATDLSEQIATAGTEASGTGNMK\_2**

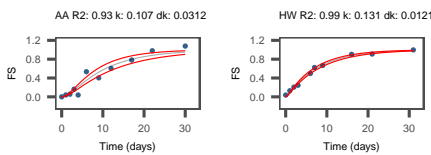

**QCR10 – LLLDWPVYNGK\_2**

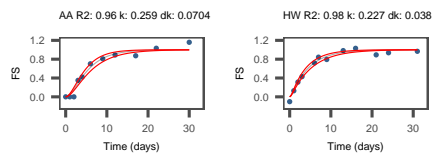

**PYGL – INPSSMFDVHVK\_3**

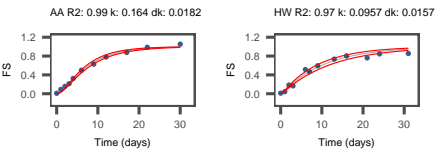

**PYGL – VSQLYMNQK\_2**

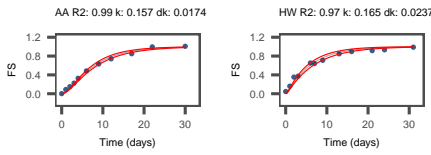

**QCR2 – AVAQNLSSADVQAAK\_2**

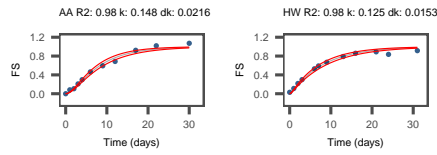

**PYGL – LITSVAEYVNDPMVGSK\_2**

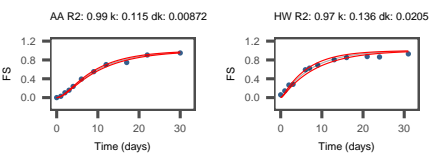

**PYGL – WLLLCNPLGDLIAEK\_2**

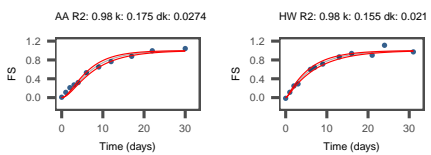

**QCR2 – TSAAPGGVLPQPDLEFTK\_2**

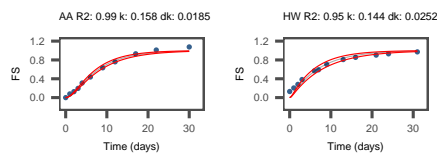

**PYGL – LKQEYFVAATLQDVIR\_3**

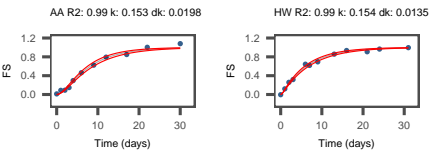

**PYR1(Non-Unique) – AMLSTGFK\_2**

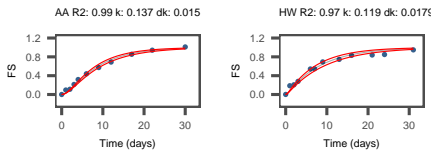

**QOR – LQSDVVVPQPSHQVLIK\_3**

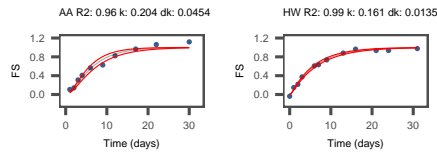

**PYGL(Non-Unique) – LVAIFPK\_2**

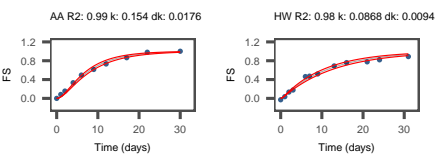

**PYR1(Non-Unique) – SFPFVSK\_2**

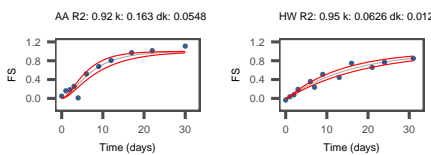

**RAB18 – IIQTPLWESENGK\_2**

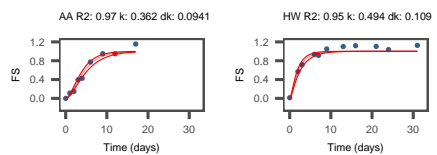

**PYGL – MSLIEEGGK\_2**

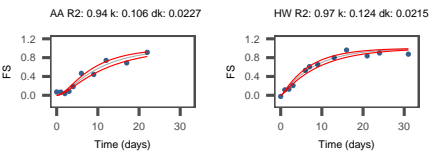

**QCR1 – VVELLADIVQSSLEDSQIEK\_2**

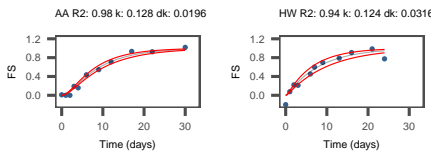

**RACK1 – TNHIGHTYGLNTVTVPDGLSCASGGK\_3**

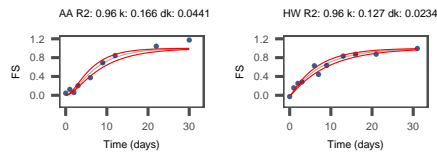

**RAP1A(Non-Unique) – SALTQVFGGIFVEK\_2**

**RDH7 – VSLCGGGYCSIK\_2**

**RIDA – TIYISQVGLDPSSGQLVPGGVVEAK\_3**

AA R2: 0.95 k: 0.0488 dk: 0.00807

HW R2: 0.97 k: 0.273 dk: 0.0546

AA R2: 0.94 k: 0.93 dk: 0.394

HW R2: 0.94 k: 0.198 dk: 0.0487

AA R2: 0.98 k: 0.14 dk: 0.0228

HW R2: 0.98 k: 0.139 dk: 0.02

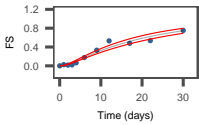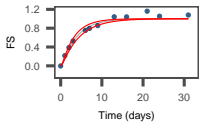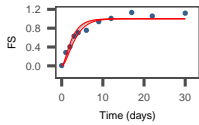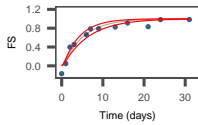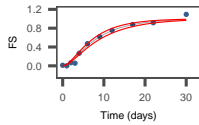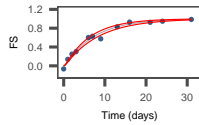

**RDH16(Non-Unique) – LETVILDVTK\_2**

**REEP5 – HESQVDSVVK\_2**

**RIDA – VEIEIAVQGGPFIK\_2**

AA R2: 0.97 k: 0.494 dk: 0.11

HW R2: 0.91 k: 0.447 dk: 0.159

AA R2: 0.98 k: 0.219 dk: 0.0357

HW R2: 0.96 k: 0.237 dk: 0.0561

AA R2: 0.99 k: 0.189 dk: 0.0249

HW R2: 1 k: 0.168 dk: 0.0104

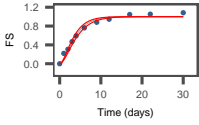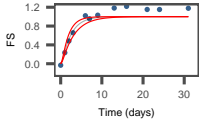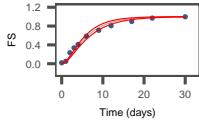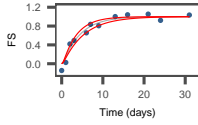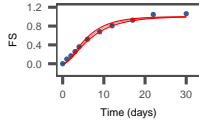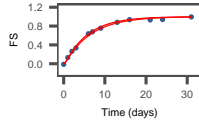

**RDH16(Non-Unique) – QVVSHLQDK\_2**

**RGN – DEQIPDGMCIDAEKG\_2**

**RISC – SYENLAFYWLK\_2**

AA R2: 0.97 k: 0.486 dk: 0.106

HW R2: 0.98 k: 0.382 dk: 0.0508

AA R2: 0.98 k: 0.176 dk: 0.0326

HW R2: 0.98 k: 0.156 dk: 0.0243

AA R2: 0.94 k: 0.0674 dk: 0.0157

HW R2: 0.96 k: 0.0555 dk: 0.0103

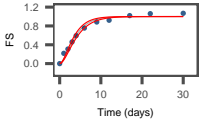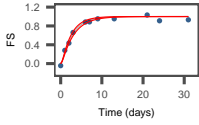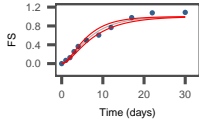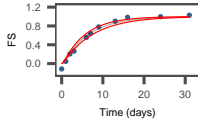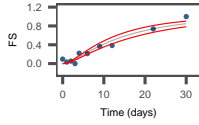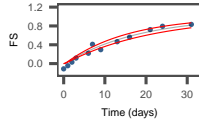

**RDH16(Non-Unique) – QVVSHLQDK\_3**

**RGN – HQGSLYSFLPDHSVK\_2**

**RL10 – FNADEFEDMVAEK\_2**

AA R2: 0.98 k: 0.534 dk: 0.123

HW R2: 0.95 k: 0.346 dk: 0.0732

AA R2: 0.99 k: 0.217 dk: 0.0268

HW R2: 0.99 k: 0.205 dk: 0.0189

AA R2: 0.95 k: 0.309 dk: 0.0922

HW R2: 0.98 k: 0.292 dk: 0.045

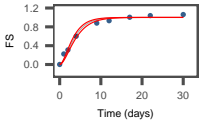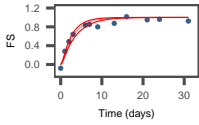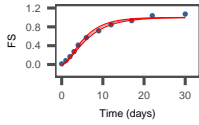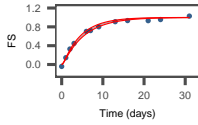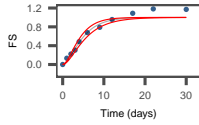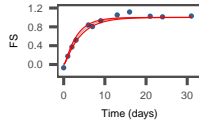

**RDH7 – NFLDSYIK\_2**

**RIDA – AAGCFDNVVK\_2**

**RL10L(Non-Unique) – GAFGKPGQTVAR\_3**

AA R2: 0.98 k: 0.489 dk: 0.135

HW R2: 0.99 k: 0.309 dk: 0.0356

AA R2: 0.99 k: 0.197 dk: 0.0241

HW R2: 0.99 k: 0.169 dk: 0.0124

AA R2: 0.96 k: 0.387 dk: 0.0896

HW R2: 0.97 k: 0.265 dk: 0.0406

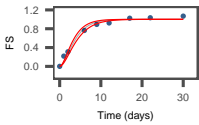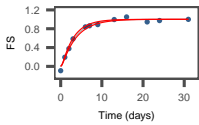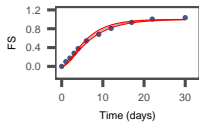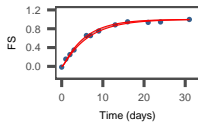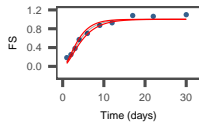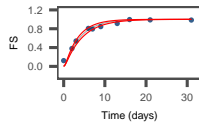

**RDH7(Non-Unique) – TESIVAATQWVK\_2**

**RIDA – TIYISQVGLDPSSGQLVPGGVVEAK\_2**

**RL11 – YDGILPGK\_2**

AA R2: 0.98 k: 0.519 dk: 0.111

HW R2: 0.97 k: 0.458 dk: 0.0706

AA R2: 0.93 k: 0.164 dk: 0.0561

HW R2: 0.96 k: 0.187 dk: 0.0449

AA R2: 0.99 k: 0.126 dk: 0.0139

HW R2: 0.98 k: 0.118 dk: 0.0141

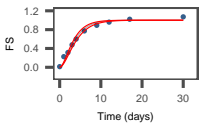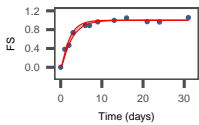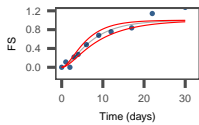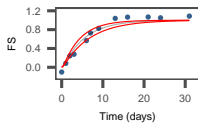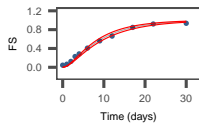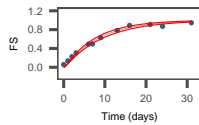

**RL12 – CTGGGATSALAPK\_2**

**RL18 – TNSTFNQVLK\_2**

**RL3 – SINPLGGFVHYGEVTNDFIMLK\_3**

AA R2: 1 k: 0.0922 dk: 0.00498

HW R2: 0.99 k: 0.075 dk: 0.00784

AA R2: 0.97 k: 0.129 dk: 0.0213

HW R2: 0.93 k: 0.0928 dk: 0.0198

AA R2: 0.95 k: 0.124 dk: 0.0267

HW R2: 0.98 k: 0.0854 dk: 0.0099

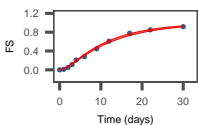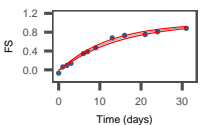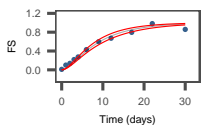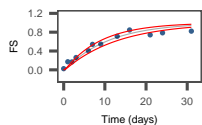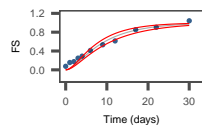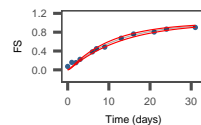

**RL14 – AAAAAAAAAAAK\_2**

**RL23 – ISLGLPVGAVINCADNTGAK\_2**

**RL30 – TGVHHYSGNNIELGTACGK\_2**

AA R2: 0.99 k: 0.0916 dk: 0.00725

HW R2: 0.93 k: 0.0747 dk: 0.0169

AA R2: 0.95 k: 0.131 dk: 0.0275

HW R2: 1 k: 0.0922 dk: 0.00463

AA R2: 0.97 k: 0.108 dk: 0.0209

HW R2: 0.9 k: 0.0827 dk: 0.03

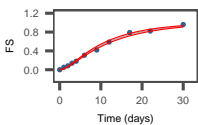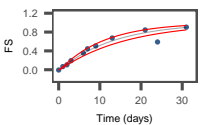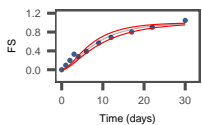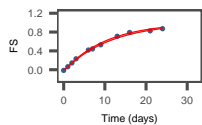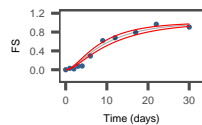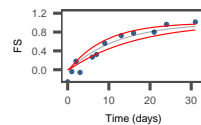

**RL15 – FFEVLIDPFHK\_3**

**RL23A – VNTLIRPDGEK\_2**

**RL30 – TGVHHYSGNNIELGTACGK\_3**

AA R2: 0.99 k: 0.123 dk: 0.0143

HW R2: 0.97 k: 0.0862 dk: 0.0157

AA R2: 0.99 k: 0.0963 dk: 0.00932

HW R2: 0.97 k: 0.0626 dk: 0.0094

AA R2: 0.98 k: 0.142 dk: 0.0221

HW R2: 0.99 k: 0.0977 dk: 0.0099

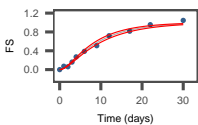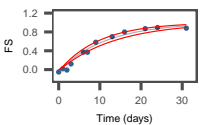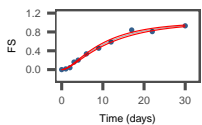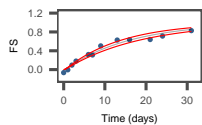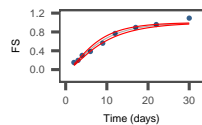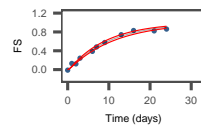

**RL15 – PVHHGVNQLK\_2**

**RL26 – KDDEQVVR\_2**

**RL30 – TGVHHYSGNNIELGTACGK\_4**

AA R2: 0.99 k: 0.14 dk: 0.0125

HW R2: 0.97 k: 0.0673 dk: 0.0106

AA R2: 0.98 k: 0.112 dk: 0.016

HW R2: 0.91 k: 0.123 dk: 0.0288

AA R2: 1 k: 0.129 dk: 0.00868

HW R2: 0.96 k: 0.101 dk: 0.0176

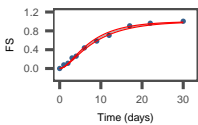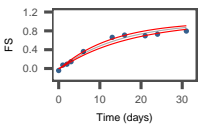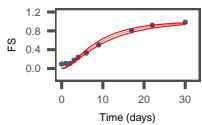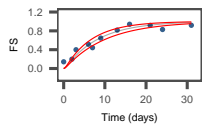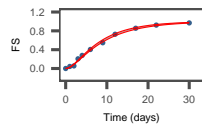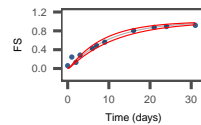

**RL15 – VLNSYWGEDSTYK\_2**

**RL27A – NQSFQPTVNLDK\_2**

**RL31 – LYTLVTVPVTFK\_2**

AA R2: 0.94 k: 0.148 dk: 0.0386

HW R2: 0.97 k: 0.0722 dk: 0.0114

AA R2: 0.93 k: 0.055 dk: 0.00942

HW R2: 0.98 k: 0.105 dk: 0.0138

AA R2: 0.98 k: 0.15 dk: 0.0213

HW R2: 0.97 k: 0.0915 dk: 0.016

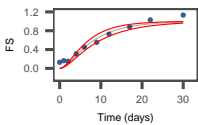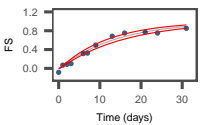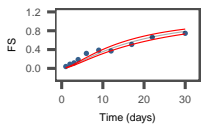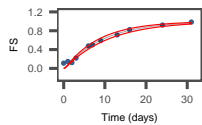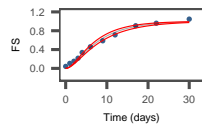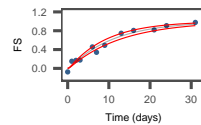

**RL17 – GLDVSLSVIEHQVNK\_2**

**RL3 – NNASTDYDLSDK\_2**

**RL32 – SYCAEIAHVSSK\_2**

AA R2: 0.94 k: 0.088 dk: 0.0227

HW R2: 0.95 k: 0.133 dk: 0.0327

AA R2: 0.99 k: 0.0834 dk: 0.00627

HW R2: 0.98 k: 0.0684 dk: 0.0089

AA R2: 0.95 k: 0.136 dk: 0.0292

HW R2: 0.99 k: 0.078 dk: 0.00628

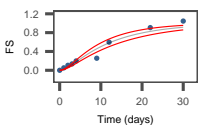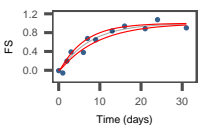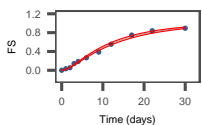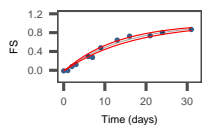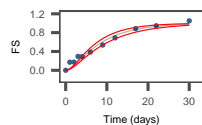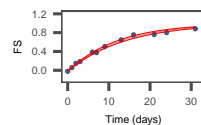



RLA2 – ILDSVIGIEADDRLNK\_3

ROA3 – GFAFVTFDDHDTVDK\_3

RS10 – IAIYELLFK\_2

AA R2: 0.99 k: 0.148 dk: 0.0131

HW R2: 0.98 k: 0.102 dk: 0.0127

AA R2: 0.97 k: 0.313 dk: 0.0663

HW R2: 0.95 k: 0.322 dk: 0.0708

AA R2: 0.99 k: 0.124 dk: 0.0114

HW R2: 0.99 k: 0.115 dk: 0.0121

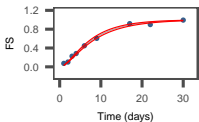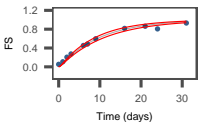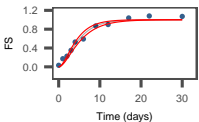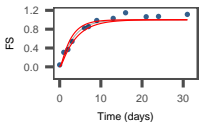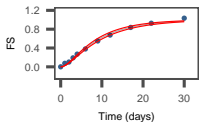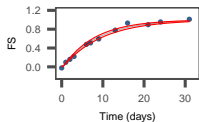

RLA2 – NIEDVIAQGVGK\_2

RPN1 – NLVEQHIQDIVVHYTFNK\_3

RS12 – QAHLVCLASNCDEPMYVK\_3

AA R2: 0.98 k: 0.135 dk: 0.0217

HW R2: 0.98 k: 0.0816 dk: 0.0096

AA R2: 0.96 k: 0.168 dk: 0.0448

HW R2: 0.98 k: 0.122 dk: 0.0138

AA R2: 0.96 k: 0.104 dk: 0.022

HW R2: 0.99 k: 0.075 dk: 0.00484

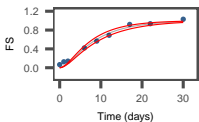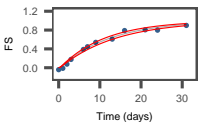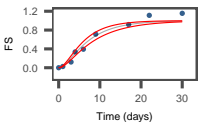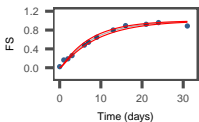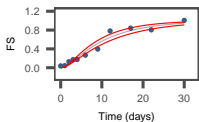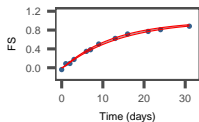

RMD3 – TATALFESPLSATVDALQSFLK\_3

RPN1 – NLVEQHIQDIVVHYTFNK\_4

RS13 – GLAPDLPEDLYHLIK\_3

AA R2: 0.96 k: 0.156 dk: 0.0367

HW R2: 0.99 k: 0.104 dk: 0.007

AA R2: 0.98 k: 0.169 dk: 0.0342

HW R2: 0.98 k: 0.125 dk: 0.0183

AA R2: 0.99 k: 0.122 dk: 0.0121

HW R2: 1 k: 0.115 dk: 0.00612

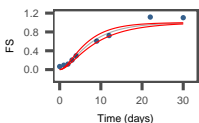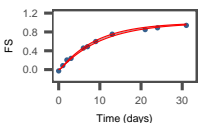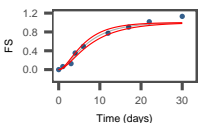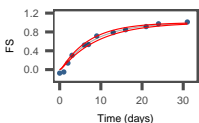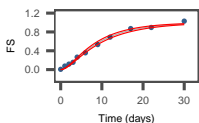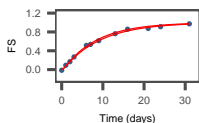

ROA2 – DYFEEYGK\_2

RPN1 – VACITEQLTLVNK\_2

RS15 – DMILPEMVGSMVGVYNGK\_2

AA R2: 0.99 k: 0.289 dk: 0.0327

HW R2: 0.93 k: 0.332 dk: 0.0987

AA R2: 0.98 k: 0.154 dk: 0.0243

HW R2: 0.96 k: 0.102 dk: 0.0196

AA R2: 0.97 k: 0.149 dk: 0.0277

HW R2: 0.99 k: 0.11 dk: 0.00866

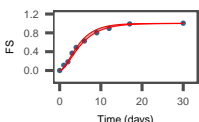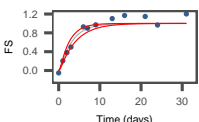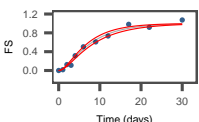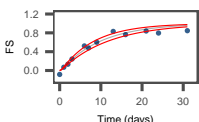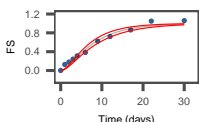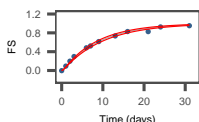

ROA2 – GFGVTFDDHDPVDK\_3

RPN2 – NPILWNVDVVIK\_2

RS16 – LLEPVLLLGK\_2

AA R2: 0.93 k: 0.419 dk: 0.132

HW R2: 0.94 k: 0.341 dk: 0.0872

AA R2: 0.99 k: 0.157 dk: 0.013

HW R2: 0.99 k: 0.104 dk: 0.0112

AA R2: 1 k: 0.132 dk: 0.00959

HW R2: 0.98 k: 0.0956 dk: 0.0147

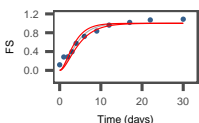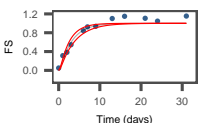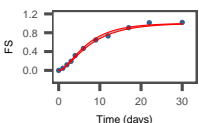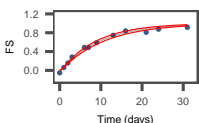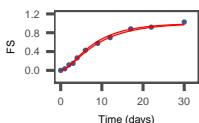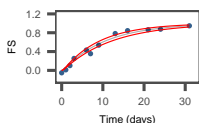

ROA2 – NYEQWGK\_2

RRBP1 – HMAASAECQNYAK\_3

RS18 – IAFAITAIK\_2

AA R2: 0.92 k: 0.655 dk: 0.369

HW R2: 0.99 k: 0.261 dk: 0.0297

AA R2: 0.97 k: 0.458 dk: 0.103

HW R2: 0.99 k: 0.364 dk: 0.0367

AA R2: 0.98 k: 0.163 dk: 0.0239

HW R2: 0.97 k: 0.0699 dk: 0.0109

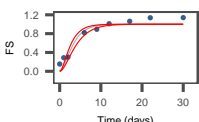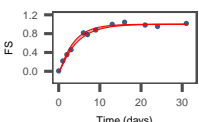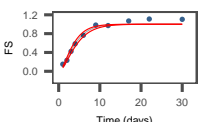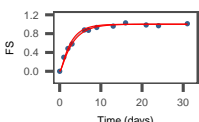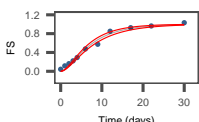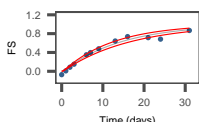

RS19 – ALAFLK\_2

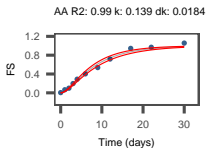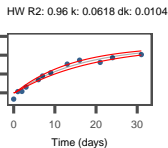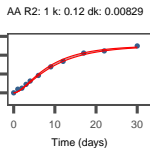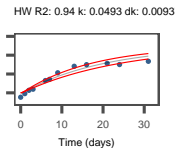

RS4X – ERHGSFDVVHVK\_4

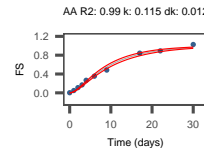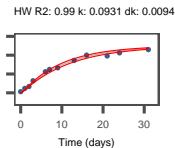

RS2 – ESEIIDFFLGASKL\_2

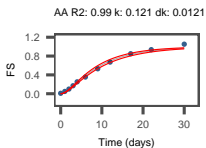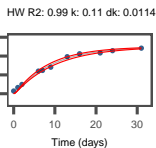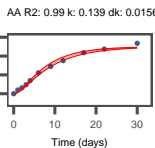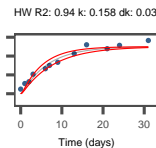

RS4X – HPGSFDVVHVK\_2

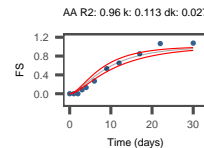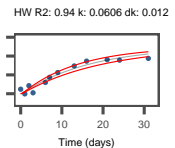

RS2 – ESEIIDFFLGASKL\_3

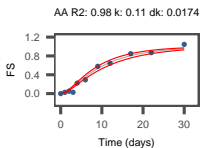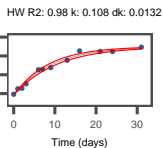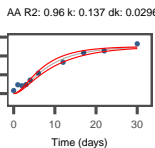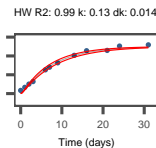

RS4X – LSNIFFVIGK\_2

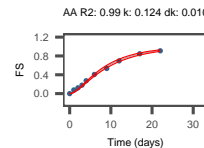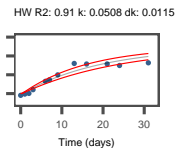

RS2 – SPYQEFTDHLVK\_2

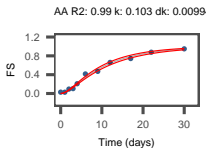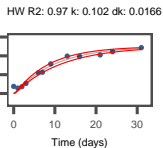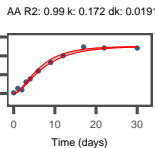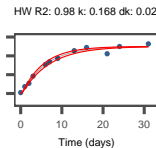

RS5 – WSTDDVQINDISLDQYIAVK\_2

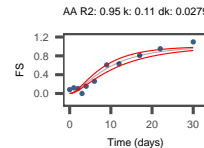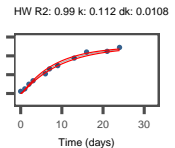

RS2 – SPYQEFTDHLVK\_3

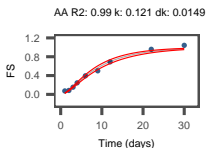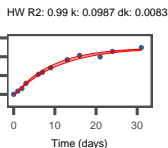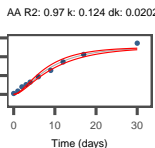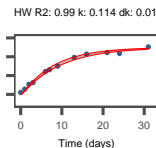

RS6 – GCIVANDLSVNLNVIVK\_2

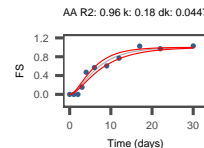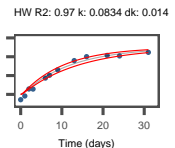

RS20 – LIDLHSPSEIVK\_3

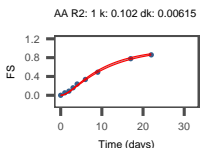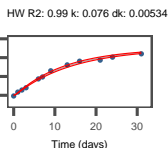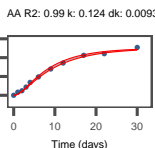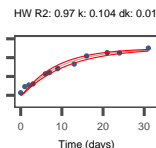

RS3 – QGVLGK\_2

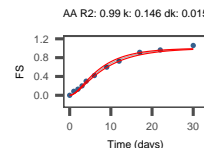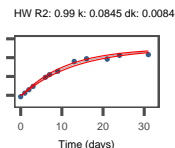

RS7 – AIHFVVPQLK\_2



**RS8 – ISSLLEEFGQGGK\_2**

**S14L2 – IMVLGANWK\_2**

**S27A5 – EGFVDGIADPLYLIDNK\_2**

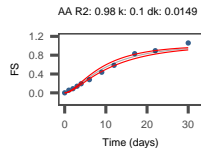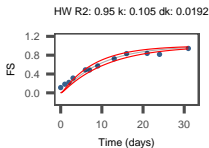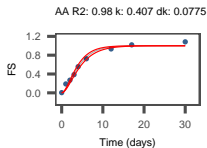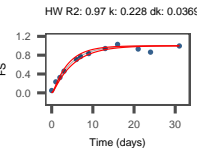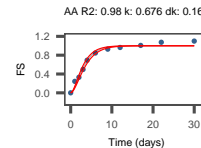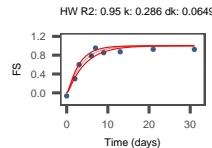

**RSSA – FLAAGTHLGGTNDLFQMEQYIYK\_3**

**S27A2 – SEVFTTTPAVYIYTSGTTGLPK\_2**

**S27A5 – LKDAVIQNTR\_2**

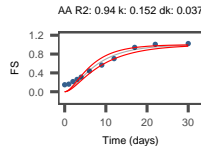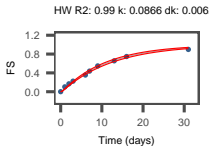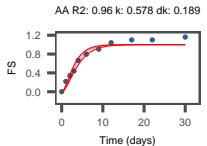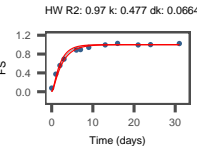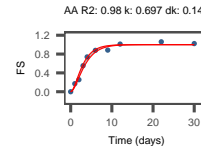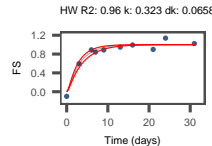

**RSSA – SDGIYIINLK\_2**

**S27A2 – TFVPMTEINIYNAIDK\_2**

**SAHH – AGIPVFAWK\_2**

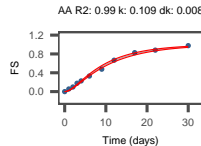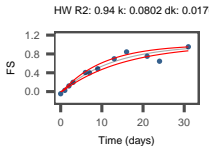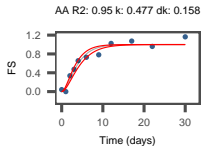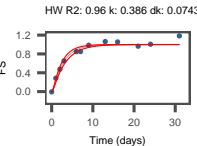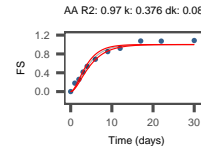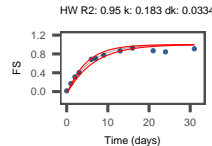

**S10A1 – DLLQTELSGFLDVQK\_3**

**S27A2 – VLLASPLDQAEVEVLPTLK\_2**

**SAHH – ATDVMIAGK\_2**

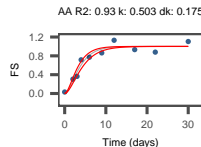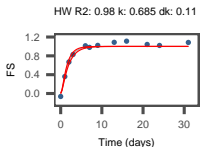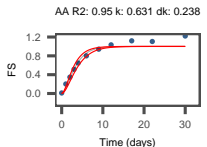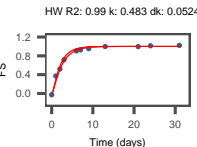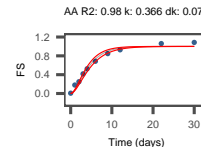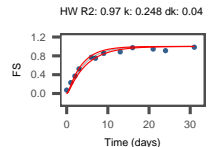

**S14L2 – CGYDLDGCPVWYDIIGPLDAK\_2**

**S27A2 – VLLASPLDQAEVEVLPTLK\_3**

**SAHH – DGPLNMLIDGGDLTNLIHTK\_2**

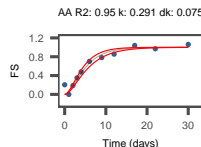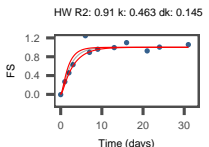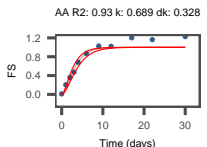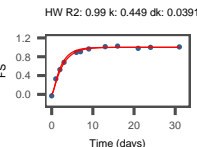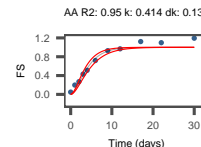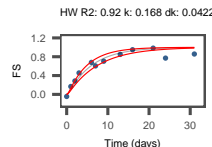

**S14L2 – HISPQLPVEYGGTMDPDGNPK\_3**

**S27A2 – YLNCPTQPKPNDR\_3**

**SAHH(Non-Unique) – ESLIDIGK\_2**

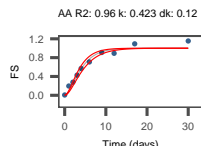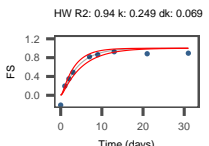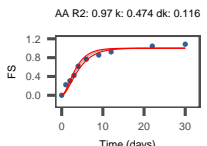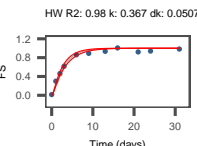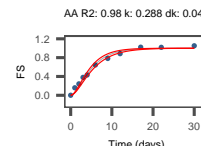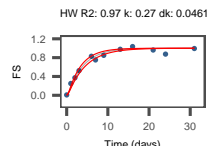

SAHH - GETDEEYLWCIEQTLHFK\_2

SAHH - VAVVAGYDVGK\_2

SAP - EEILAALEK\_2

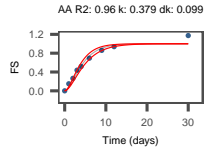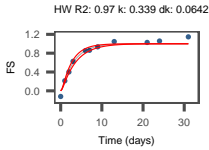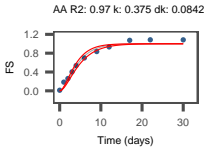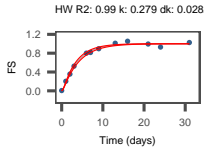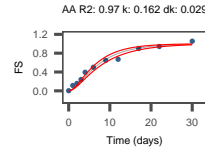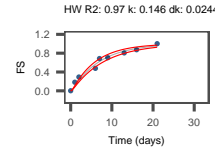

SAHH - GETDEEYLWCIEQTLHFK\_3

SAHH - VNIKPQVDR\_2

SAP - EVVDSYLPVILDMIK\_2

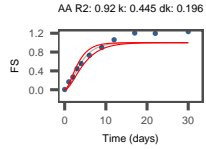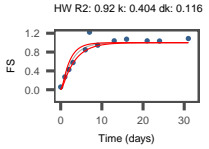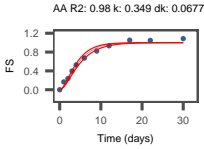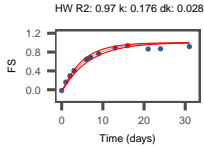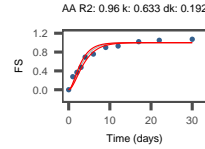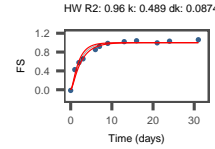

SAHH - GISEETTGVHNLK\_2

SAHH - VNIKPQVDR\_3

SAP - EVVDSYLPVILDMIK\_3

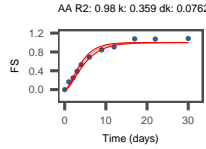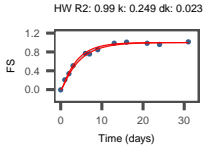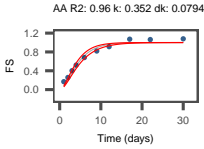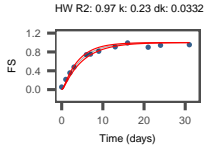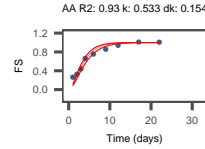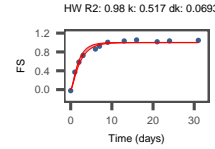

SAHH - SFTNQVMAQIELWTHPK\_3

SAHH - VPAINVDSVTK\_2

SAP - LGPGVSDICK\_2

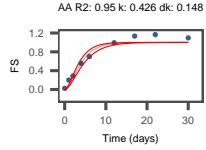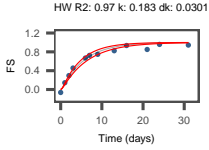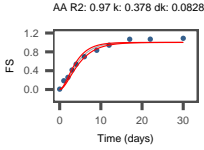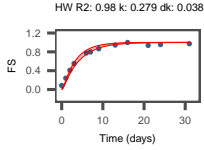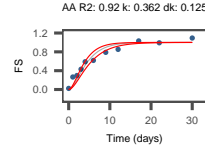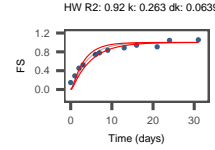

SAHH - SKFDNLKGR\_3

SAHH - WLNENAVEK\_2

SAP - LVLYLEHNLEK\_3

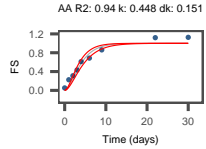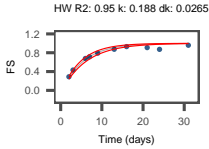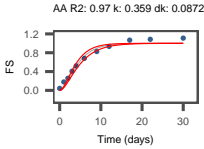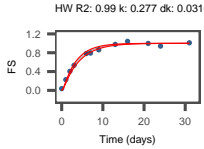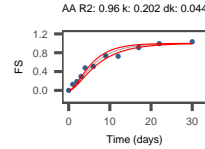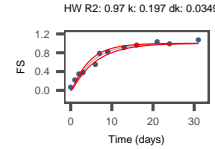

SAHH - SNSFTNQVMAQIELWTHPK\_3

SAHH - WSSCNFSTQDHAAAIAK\_3

SAP - LVSDQVAVK\_2

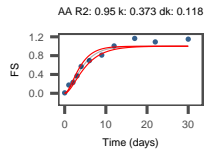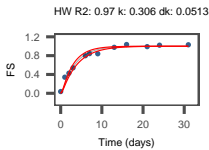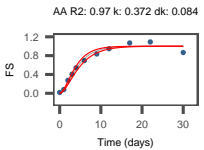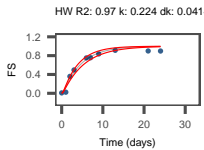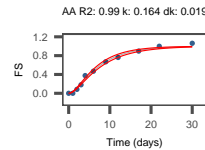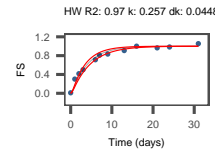

SAP - TCEWIHSSLSASCK\_2

SARDH - GAAAVFNMSYFGK\_2

SBP1 - CGPGYSTPLEAMK\_2

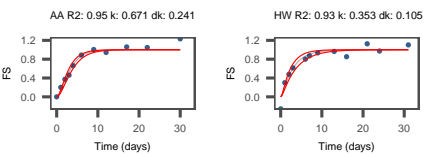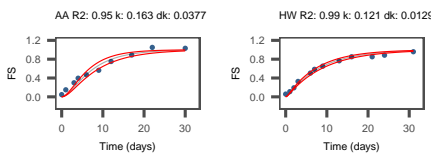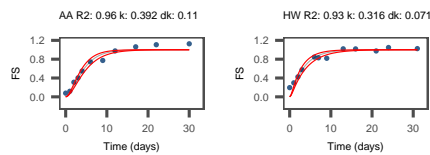

SAP - TVVTEAGLLK\_2

SARDH - LGGCGQELAHWIVHGRPEK\_4

SBP1(Non-Unique) - DELHHSGWNTCSSCFGDSTK\_3

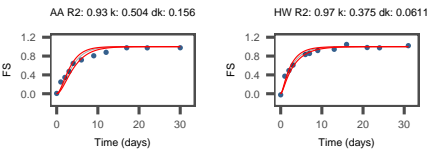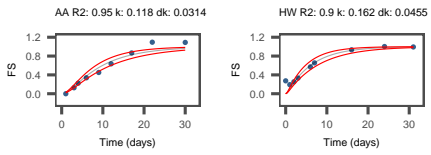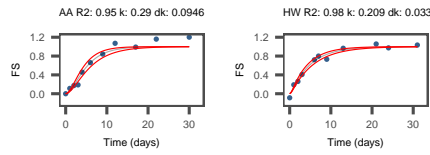

SARDH - AIDSLSEIK\_2

SARDH - PGWFNPQETAQLVDYDYGAYGNQAHK\_4

SBP1 - EGSMLLQIDVTVNGGLK\_2

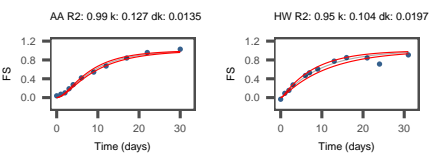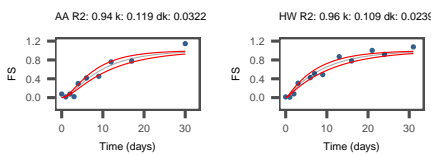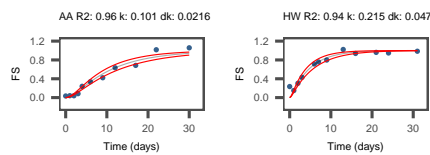

SARDH - AYGIESHVLSPAETK\_2

SARDH - SPFPDNKR\_2

SBP1(Non-Unique) - FLVDFGKEPLGALAHELR\_4

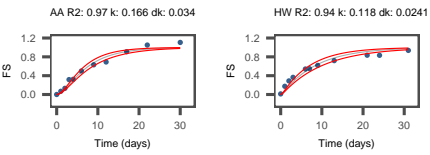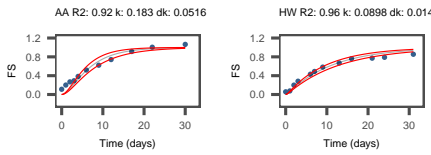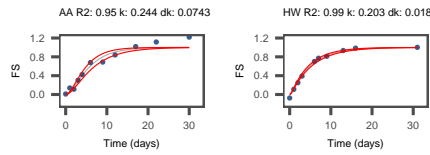

SARDH - AYGIESHVLSPAETK\_3

SARDH - STVCGPESFTPDHKPLMGAEAPLR\_4

SBP1(Non-Unique) - GSFVLLDGETFEVK\_2

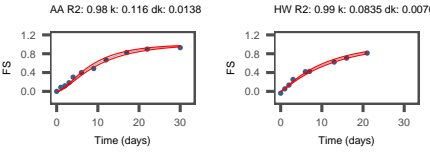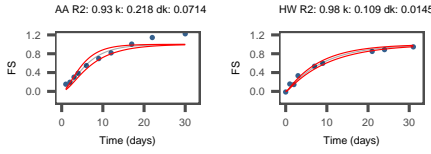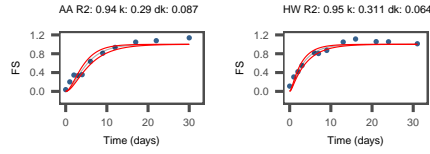

SARDH - DPSGGPVLDFVK\_2

SARDH - VAAVETEHGSIQTPVCNVNAGVWASK\_3

SBP1 - GTWEKPGDAAPMGYDFWYQPR\_2

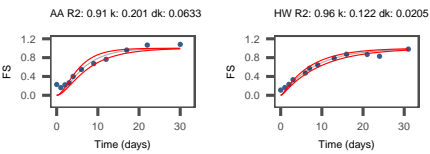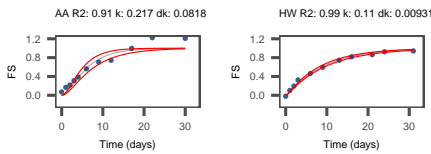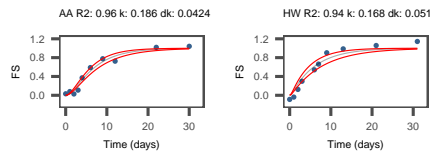

**SBP1 – GTWEKPGDAAMPGYDFWYQPR\_2**

**SBP1(Non-Unique) – QYDISNPQKPR\_2**

**SCP2 – HIEVLIDK\_2**

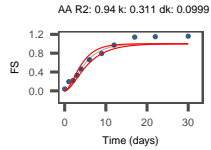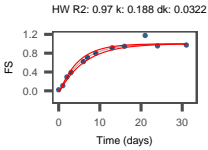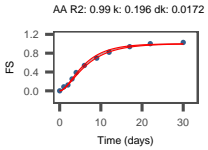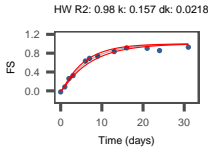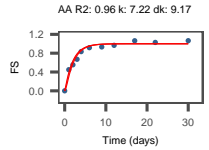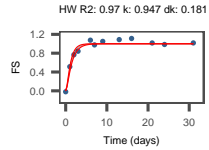

**SBP1(Non-Unique) – HNMVSTEWAAPNVFK\_2**

**SBP1(Non-Unique) – VIEASEIQAK\_2**

**SCP2 – IAGNMGLAMK\_2**

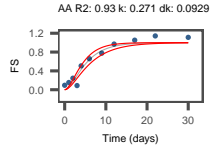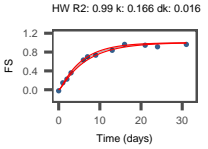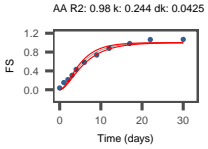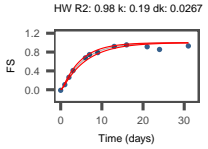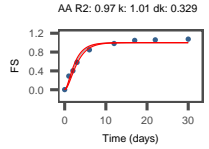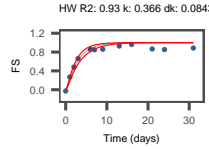

**SBP1(Non-Unique) – IPGGPQMQLSLDGK\_2**

**SC23A – MVVPVAALFTPLK\_2**

**SCP2 – IGGIFAFK\_2**

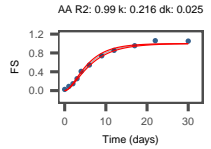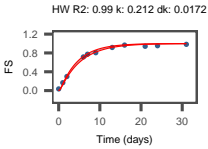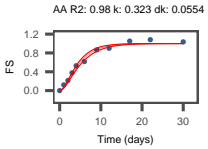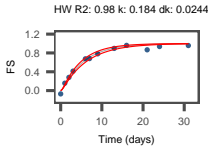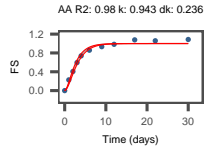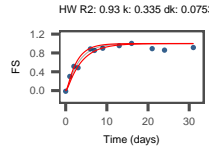

**SBP1 – LYATTSLSYAWDK\_2**

**SCP2 – ADCTITMADSDLLALMTGK\_2**

**SCP2 – MNPQSAFFQ GK\_2**

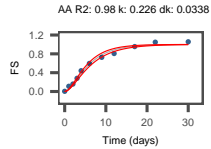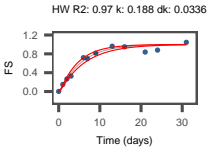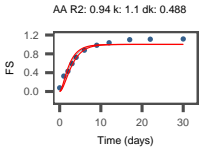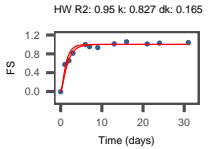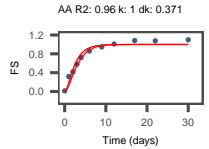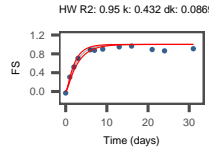

**SBP1 – NAEGTWSVEK\_2**

**SCP2 – ADCTITMADSDLLALMTGK\_3**

**SCP2 – QLIIQGLLANCVLALGF EK\_2**

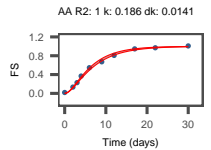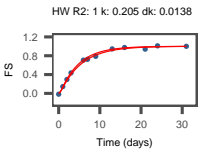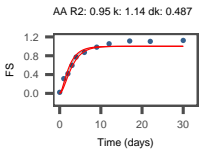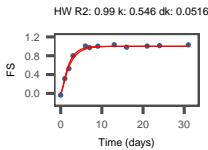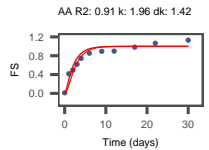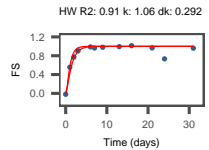

**SBP1(Non-Unique) – NTGTEAPDYLATVDVDPK\_2**

**SCP2 – EATWVVDVK\_2**

**SCP2 – THQVSAAPTSSAGDGFK\_2**

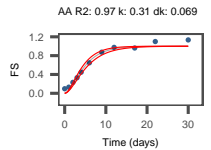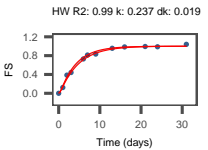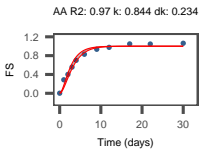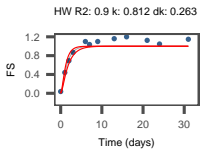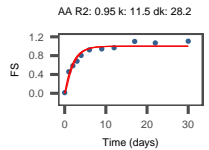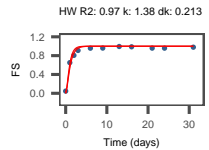

**SDHA – VGSVLQEGCEK\_2**

**SDHB – MQTYEVDLNK\_2**

**SMD1 – YFILPDSLPLDLLVDVEPK\_2**

AA R2: 0.98 k: 0.222 dk: 0.0372

HW R2: 0.92 k: 0.304 dk: 0.0735

AA R2: 0.99 k: 0.131 dk: 0.0105

HW R2: 0.99 k: 0.177 dk: 0.0187

AA R2: 0.99 k: 0.0997 dk: 0.00814

HW R2: 0.99 k: 0.101 dk: 0.00768

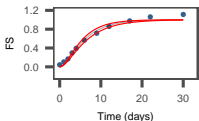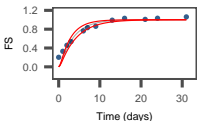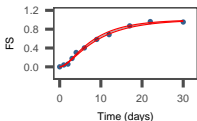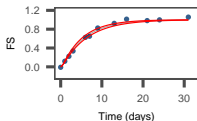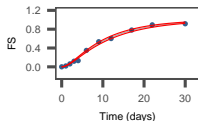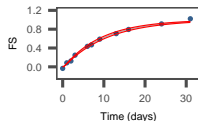

**SDHA – VTLEYRPVIDK\_2**

**SDHL – ALGVNTVGAQTLK\_2**

**SMD3 – FLILPDLMLK\_2**

AA R2: 0.99 k: 0.157 dk: 0.0178

HW R2: 0.95 k: 0.2 dk: 0.038

AA R2: 0.97 k: 0.663 dk: 0.181

HW R2: 0.94 k: 0.315 dk: 0.0762

AA R2: 0.98 k: 0.194 dk: 0.0273

HW R2: 0.96 k: 0.118 dk: 0.024

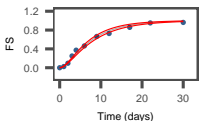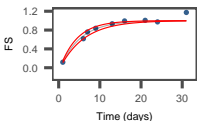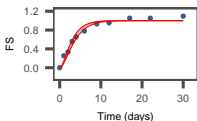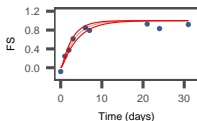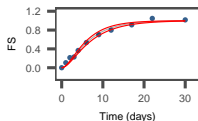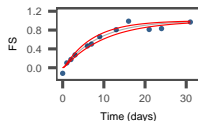

**SDHA – WHFYDTVK\_3**

**SDHL – NNPQWVYISPFDDLIWEGHTSLVK\_3**

**SODC – GDGPVQGTIHFQK\_2**

AA R2: 0.99 k: 0.219 dk: 0.0252

HW R2: 0.96 k: 0.2 dk: 0.048

AA R2: 0.94 k: 1.02 dk: 0.514

HW R2: 0.98 k: 0.313 dk: 0.0426

AA R2: 0.95 k: 0.141 dk: 0.0309

HW R2: 0.97 k: 0.167 dk: 0.0244

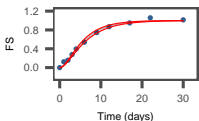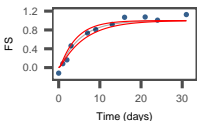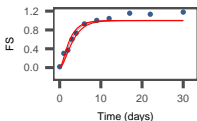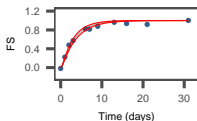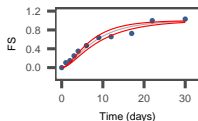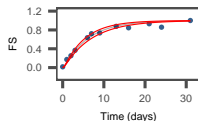

**SDHB – CGPMVLDAIK\_2**

**SF3B1 – AIGPHDVLATLLNNLK\_3**

**SODC – GDGPVQGTIHFQK\_3**

AA R2: 0.99 k: 0.193 dk: 0.026

HW R2: 0.95 k: 0.151 dk: 0.0209

AA R2: 0.95 k: 14.6 dk: 83

HW R2: 0.92 k: 0.36 dk: 0.122

AA R2: 0.98 k: 0.185 dk: 0.0282

HW R2: 0.96 k: 0.22 dk: 0.041

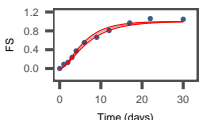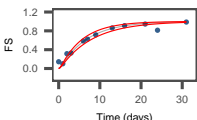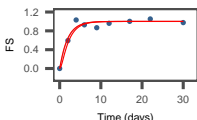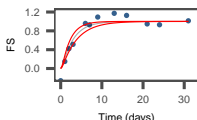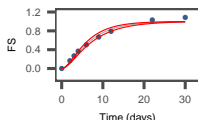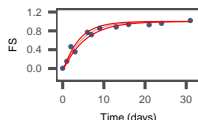

**SDHB – CHTIMNCTQCPK\_2**

**SFXN1 – YAYDSAFHPDTEK\_3**

**SODM – GDVTTQVALQPALK\_2**

AA R2: 0.99 k: 0.21 dk: 0.031

HW R2: 0.96 k: 0.106 dk: 0.0218

AA R2: 0.92 k: 0.271 dk: 0.11

HW R2: 0.98 k: 0.136 dk: 0.0191

AA R2: 0.99 k: 0.12 dk: 0.013

HW R2: 1 k: 0.134 dk: 0.00878

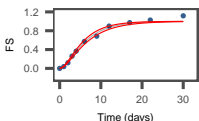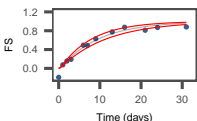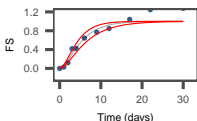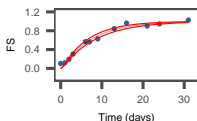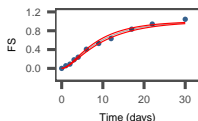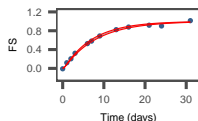

**SDHB – DLVPDLSNFYAQYK\_2**

**SGMR1 – YWAEISDITISGTFHQWK\_3**

**SODM – HHAAYVNNLNATEEK\_4**

AA R2: 0.97 k: 0.217 dk: 0.0418

HW R2: 0.99 k: 0.202 dk: 0.0217

AA R2: 0.92 k: 0.428 dk: 0.186

HW R2: 0.97 k: 0.258 dk: 0.0456

AA R2: 0.98 k: 0.14 dk: 0.0196

HW R2: 0.98 k: 0.148 dk: 0.0186

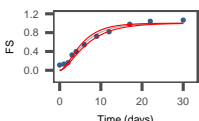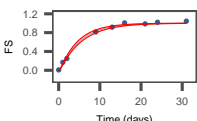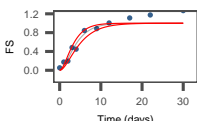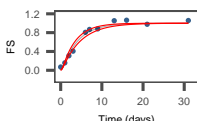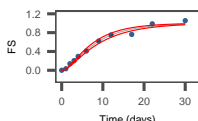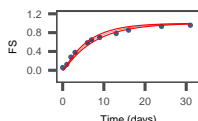

SPA3K(Non-Unique) – NIVFSPLSISAALALVSLGAK\_2

ST1A1 – IPFLFSCPGVPPGLETLK\_2

ST1D1 – THLPVQLLSSFWK\_3

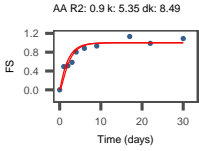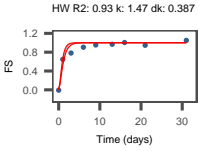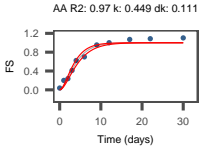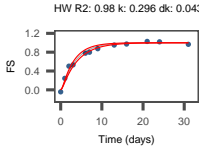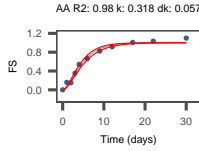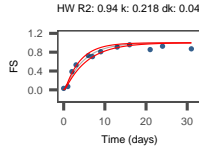

SPEB – EHGPGVLVHVGAHNTTDKPR\_4

ST1A1 – LHDPDGTWESFLENFMDGK\_3

STA10 – AVSIQTGYLIQSTGPK\_2

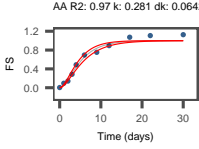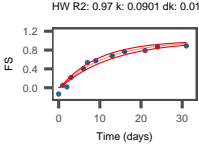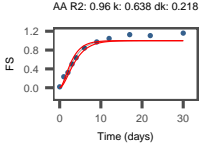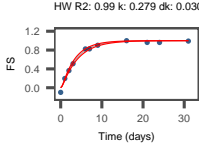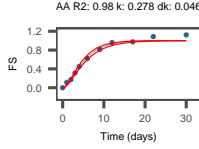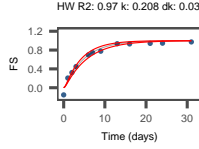

SPRE – LLLINNAATLGDVSK\_2

ST1A1 – THLPLSLLPQSLLDQK\_2

STIP1 – LLEFLALK\_2

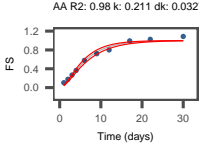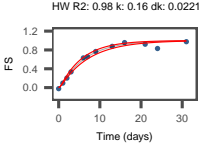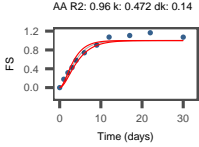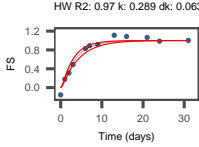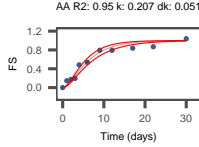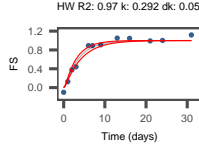

SPRE – SDGALVDCGTSAQK\_2

ST1A1 – THLPLSLLPQSLLDQK\_3

SUCA – AKPVVSFIAGTAPPGR\_2

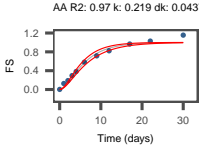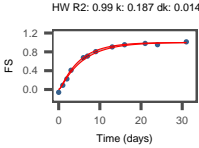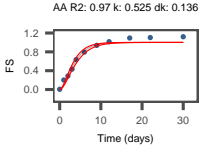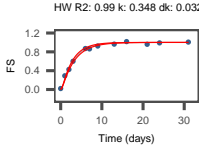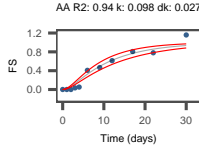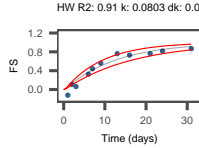

SPRE – TVNVISSLCALQPYK\_2

ST1D1 – ENPSANYTTMMK\_2

SUCA – AKPVVSFIAGTAPPGR\_3

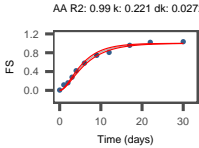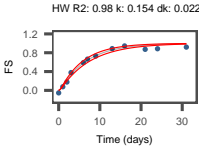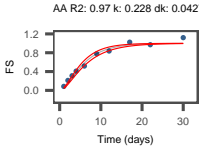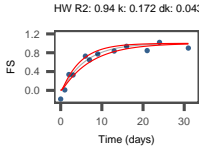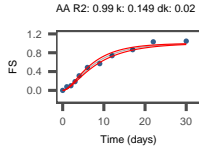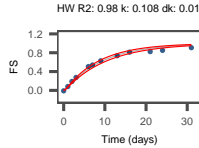

SSDH – ILLHHAANSVK\_2

ST1D1 – FMAGQVSGFPWYDHVK\_3

SUCA – HGLPVPFNTVK\_2

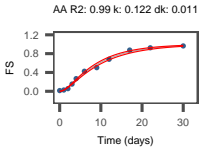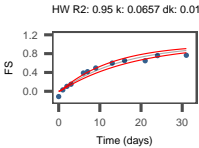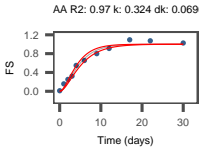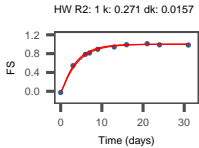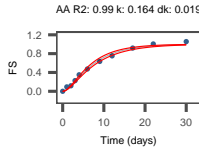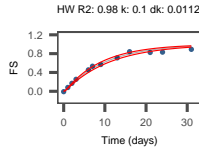

SUCA - IICQGFTGK\_2

SUCB1 - MGFPNSIVDSAENMIK\_2

SYEP - SQSGSLSSGGAGEGQGPK\_2

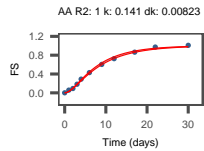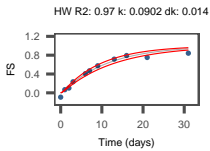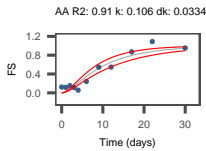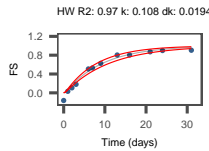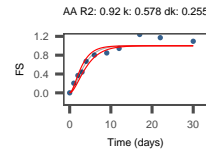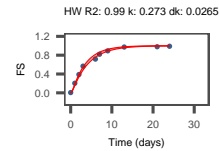

SUCA - ISALQSAGVIVMSPAQLGTTIYK\_2

SUCB2 - EAQVYEAFK\_2

SYQ - NEVDMQVLHLLGPK\_3

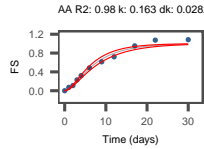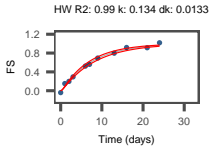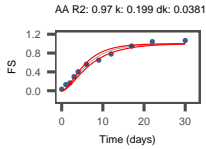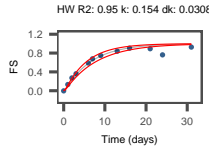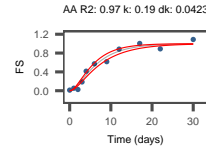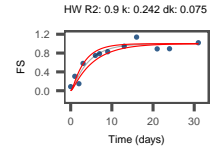

SUCA - LIGNPCGVINPGECK\_2

SUCB2 - IDATQVEVNPFGETPEGQVCFDAK\_2

SYTC - DQELYFFHELSPGSCFFLPK\_3

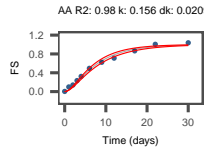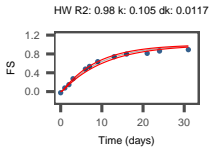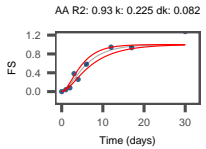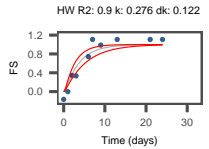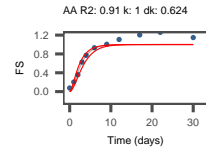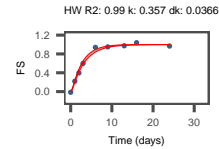

SUCA - MGHAGAIAGGK\_3

SUCB2 - KLMSEHGVR\_3

SYTC - FLGDIEIWNQAEK\_2

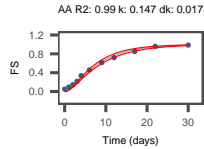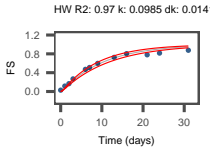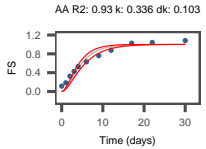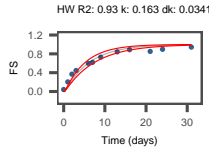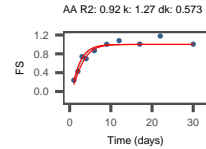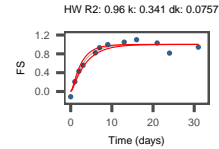

SUCA - QGTFHSQQALEYGTGK\_2

SUCB2 - VVGELAQMGIGNLATK\_2

TADBP - TSDLIVLGLPWK\_2

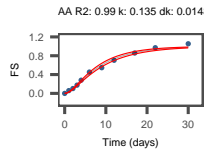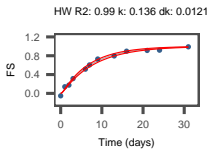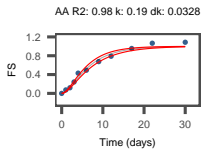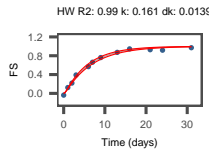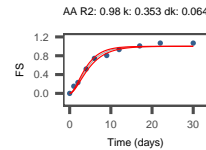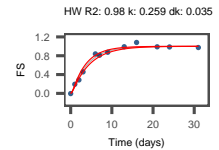

SUCA - QGTFHSQQALEYGTGK\_3

SUOX - LHVVGAPGGQSLSLSLDDLHK\_4

TALDO - LFLVFGAIELK\_2

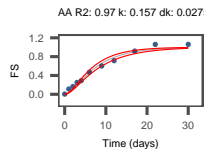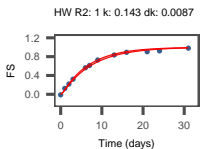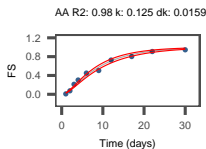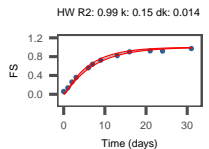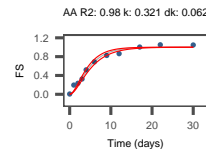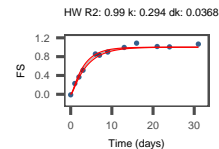

TALDO - LGGPQEEQIK\_2

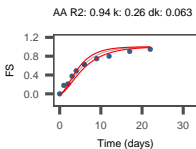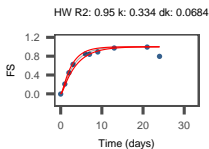

TBA1B(Non-Unique) - VGINYQPPTVPGDLAK\_2

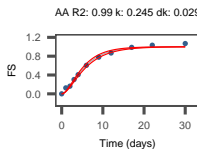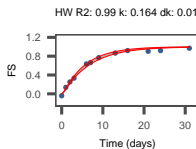

TCPA - ILATGANVILTTGGIDDMYLK\_2

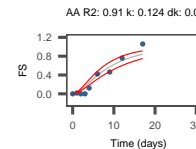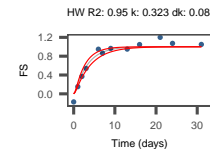

TBA1B(Non-Unique) - ACWELYCLEHGIQDPGQMPSDK\_3

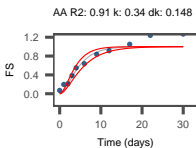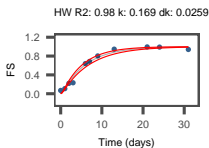

TBA4A - TIGGGDSFTTFECETGAGK\_2

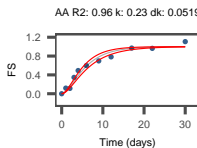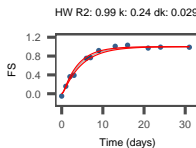

TCPB - LSSFIGAIGDLVK\_2

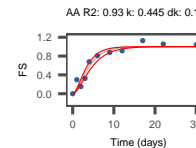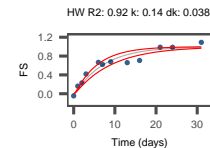

TBA1B(Non-Unique) - FDLMYAK\_2

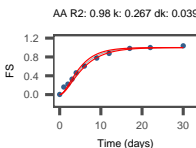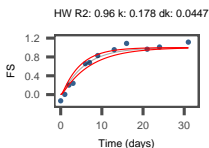

TBB4B(Non-Unique) - EIVHLQAGCGNQIGAK\_2

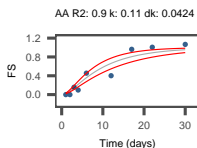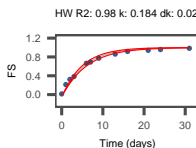

TCPB - SLHDALCVLAQTVK\_3

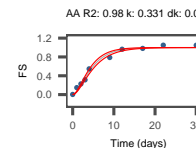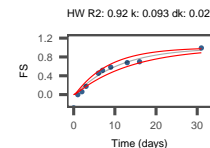

TBA1B(Non-Unique) - IHFPLATYAPVISA EK\_3

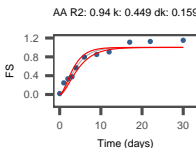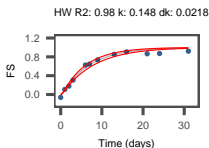

TBB4B(Non-Unique) - EVDEQMLNVQNK\_2

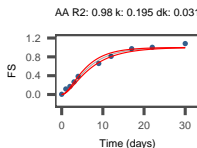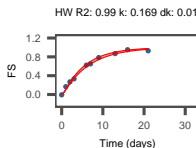

TCPD - DALSDLALHFLNK\_3

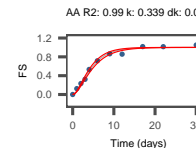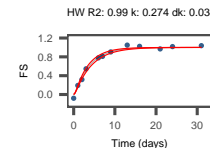

TBA1B(Non-Unique) - SIQFVWCPTGFK\_2

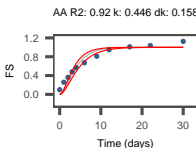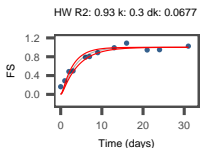

TBB4B - INVYNEATGKK\_2

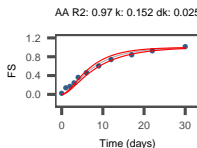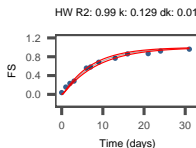

TCPE - GSNDMQYQHVIETLIGK\_3

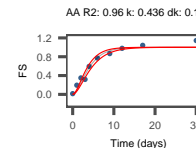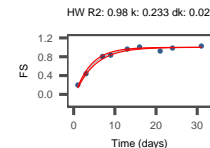

TBA1B(Non-Unique) - TIGGGDSFNFFSETGAGK\_2

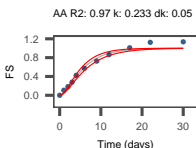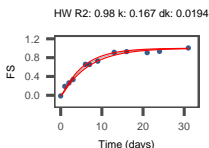

TCPA - EVGDGTTSVIIAELLK\_2

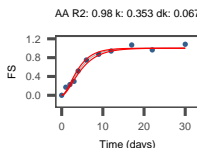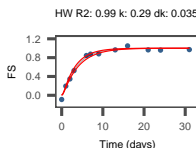

TCPH - INALTAASEAALIVSVDTEIK\_3

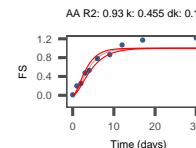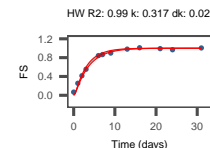





**THIKB(Non-Unique) - TITVSQDEGVRPSTTMQGLAK\_2**

**THIL - IHMGNAENTAK\_3**

**THIM - ALDLDPSK\_2**

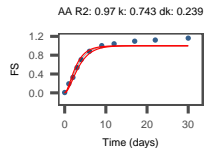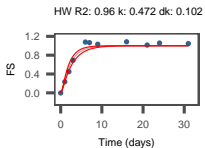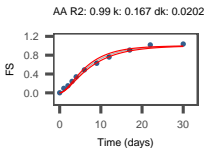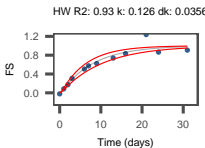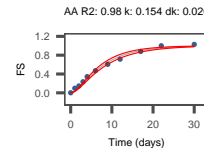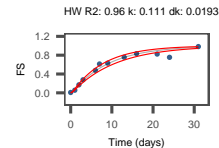

**THIKB(Non-Unique) - TITVSQDEGVRPSTTMQGLAK\_3**

**THIL - LEDLVK\_2**

**THIM - DGTVTAGNASGVSDGAGAVIAISEDVK\_3**

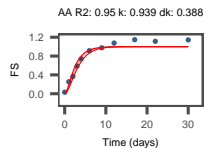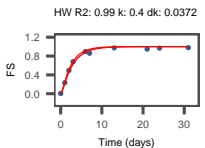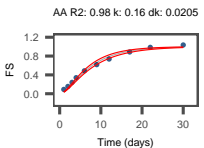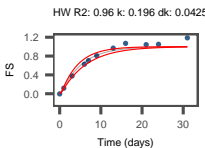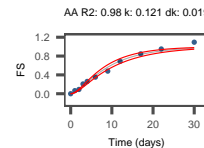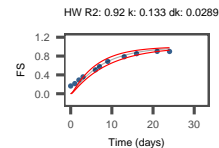

**THIL - ASKPTLNEVVISAIR\_2**

**THIL - LNVKPLAR\_2**

**THIM - DMULDIVNEAFAPQLSVQK\_2**

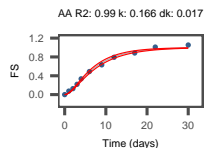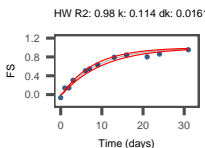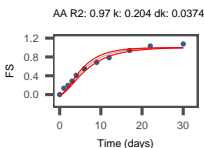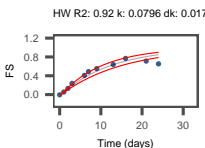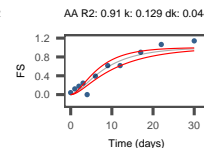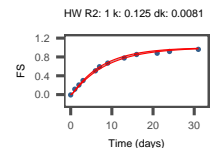

**THIL - ASKPTLNEVVISAIR\_3**

**THIL - QATLGAGLPSTPCTTVNK\_2**

**THIM - DMULDIVNEAFAPQLSVQK\_3**

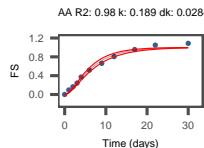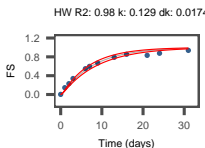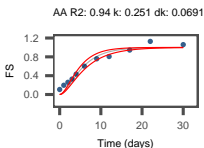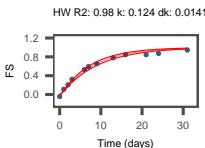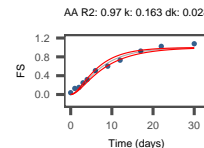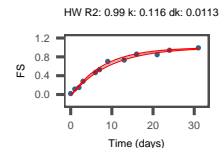

**THIL - IAAFADAAVDPIDFLAPAYVPK\_2**

**THIL - TPIGSFLGSLASQPATK\_3**

**THIM - GVFIYAAK\_2**

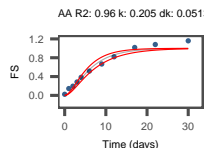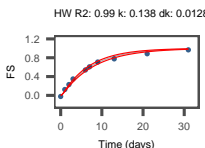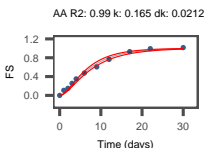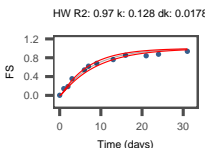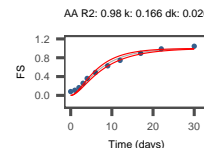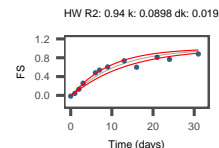

**THIL - IHMGNAENTAK\_2**

**THIM - AANEAGYFNEEMAPIEVK\_2**

**THIM - KHNFPLAR\_3**

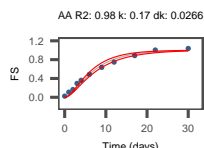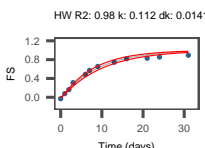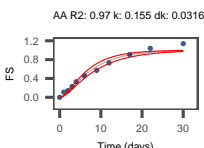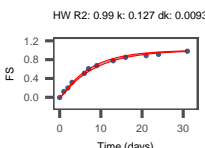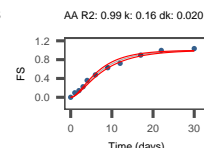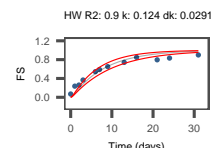



**TKFC – TMLDSLWAAAEQFAWK\_2**

**TKT – LGQSDPALQHVDIYQK\_3**

**TPIS – HVFGSEDLIGQK\_3**

AA R2: 0.97 k: 0.306 dk: 0.0695

HW R2: 0.98 k: 0.217 dk: 0.0309

AA R2: 0.97 k: 0.134 dk: 0.0262

HW R2: 0.99 k: 0.113 dk: 0.00984

AA R2: 0.99 k: 0.156 dk: 0.0157

HW R2: 0.99 k: 0.155 dk: 0.0167

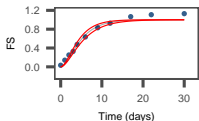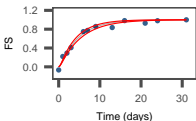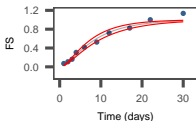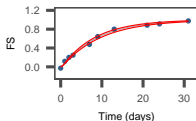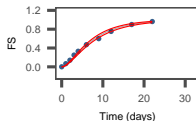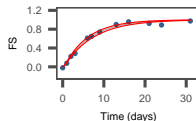

**TKFC – TMLDSLWAAAEQFAWK\_3**

**TKT – MPTPSYK\_2**

**TPIS – IAVAQNCYK\_2**

AA R2: 0.97 k: 0.29 dk: 0.0658

HW R2: 1 k: 0.221 dk: 0.016

AA R2: 0.98 k: 0.157 dk: 0.0196

HW R2: 0.96 k: 0.0444 dk: 0.0058

AA R2: 0.99 k: 0.209 dk: 0.0279

HW R2: 0.99 k: 0.162 dk: 0.0169

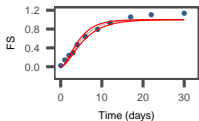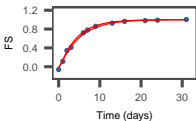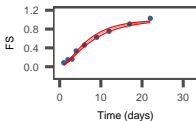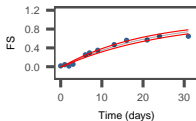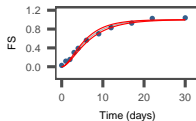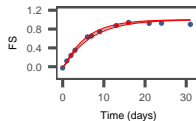

**TKFC – VALLSGGSGHEPAHAGFIGK\_2**

**TKT – NSTFSELFK\_2**

**TPIS – TATPQAQEVHEK\_2**

AA R2: 0.93 k: 0.217 dk: 0.08

HW R2: 0.98 k: 0.2 dk: 0.0328

AA R2: 0.99 k: 0.129 dk: 0.0126

HW R2: 0.98 k: 0.0903 dk: 0.0121

AA R2: 0.99 k: 0.186 dk: 0.0268

HW R2: 0.99 k: 0.172 dk: 0.0134

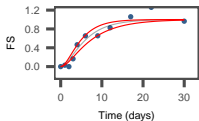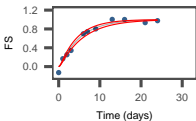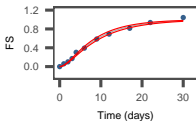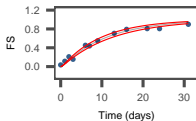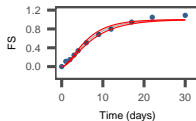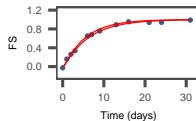

**TKFC – VALLSGGSGHEPAHAGFIGK\_3**

**TKT – TSRPENAIYSNNEDFQVGAQK\_3**

**TPIS – TATPQAQEVHEK\_3**

AA R2: 0.96 k: 0.288 dk: 0.071

HW R2: 0.98 k: 0.255 dk: 0.0375

AA R2: 0.97 k: 0.147 dk: 0.0313

HW R2: 0.99 k: 0.113 dk: 0.0102

AA R2: 0.98 k: 0.19 dk: 0.028

HW R2: 1 k: 0.184 dk: 0.0106

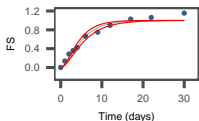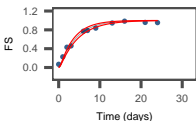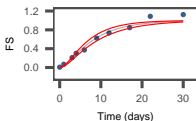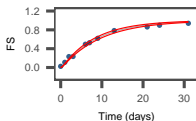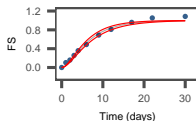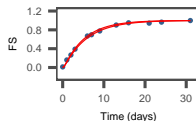

**TKT(Non-Unique) – AYGLALAK\_2**

**TLN1 – VGAAATAVTQALNELLQHVK\_3**

**TPIS – VSHALAEGLVIACIGEK\_3**

AA R2: 0.99 k: 0.135 dk: 0.0125

HW R2: 0.92 k: 0.0773 dk: 0.0191

AA R2: 0.98 k: 0.302 dk: 0.0559

HW R2: 0.99 k: 0.256 dk: 0.0316

AA R2: 0.98 k: 0.21 dk: 0.0346

HW R2: 0.98 k: 0.164 dk: 0.0206

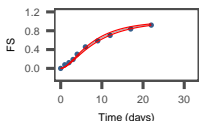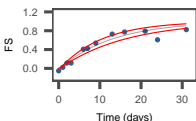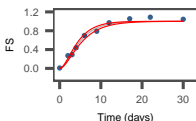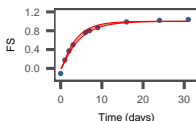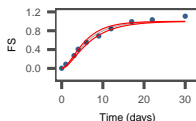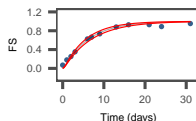

**TKT – HQPTAIK\_2**

**TPIS – HVFGSEDLIGQK\_2**

**TPIS – VVLAYEPVWAGTGK\_3**

AA R2: 0.99 k: 0.141 dk: 0.0144

HW R2: 0.98 k: 0.0935 dk: 0.0125

AA R2: 0.99 k: 0.164 dk: 0.0138

HW R2: 0.99 k: 0.172 dk: 0.0177

AA R2: 0.97 k: 0.218 dk: 0.0513

HW R2: 0.99 k: 0.166 dk: 0.0139

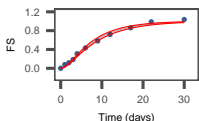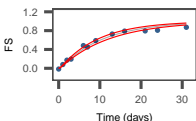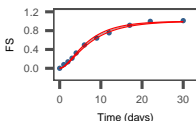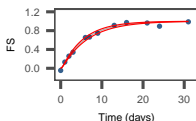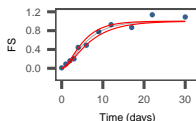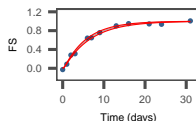

**TPMT – AWGLDYLFEK\_2**

**TPA – EFSMEDICQEWTFIMK\_2**

**UBA1 – IIPAIATTAFAVVLGVLCELYK\_3**

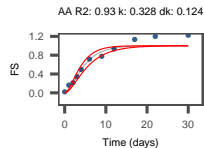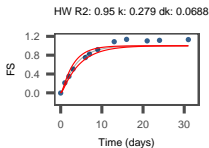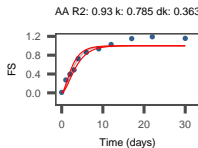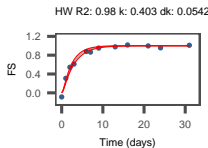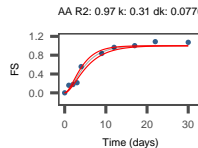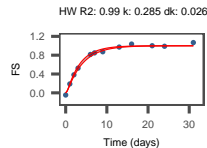

**TRAP1 – INTLQAIWMMDPK\_2**

**TXND5 – SFEDTIAQGITFKV\_2**

**UBA1 – QPAENVNQLTDSK\_2**

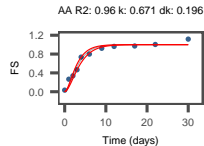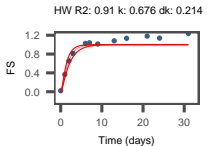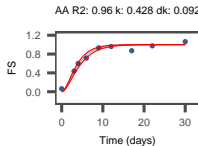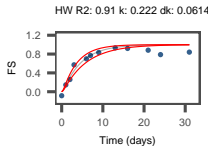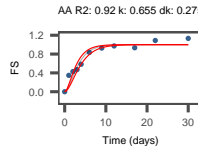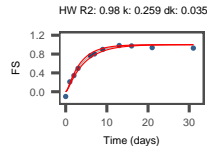

**TRAP1 – YIAQAYDKPR\_2**

**TXTP – FIHDQTSSNPK\_2**

**UBB(Non-Unique) – T LSDYNIQK\_2**

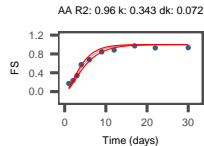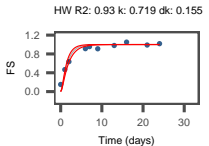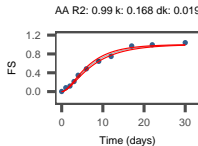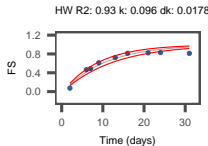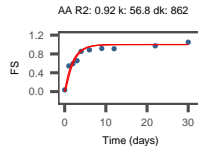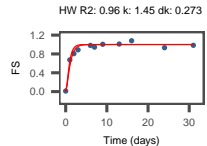

**TRFE – KPVDQYEDCYLAR\_2**

**TXTP – FIHDQTSSNPK\_3**

**UBE2N – YFHVVIAGPQDSPFEGGTFK\_3**

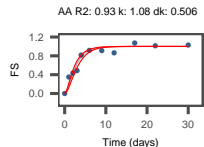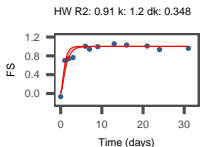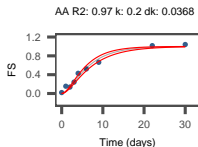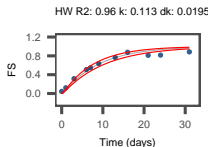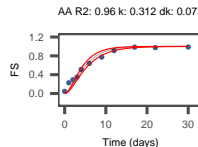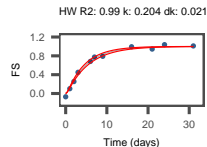

**TTC38 – DALKPNPLTER\_2**

**UBA1 – AAVASLLQSVQPEFTPK\_2**

**UCRI – KGPAPLNLEVPAYFTSDDVVVVG\_2**

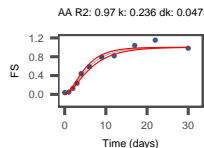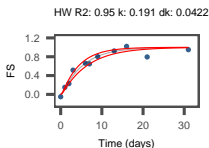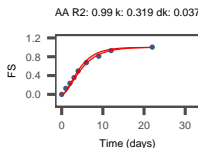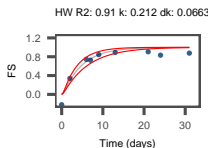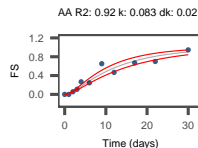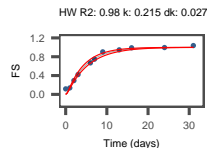

**TTC38 – NAGLPLSTTSNEACK\_2**

**UBA1 – AAVASLLQSVQPEFTPK\_3**

**UD11 – LPCSLDSEATQCPVPLSYVPK\_2**

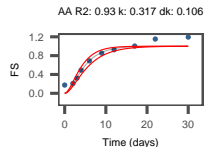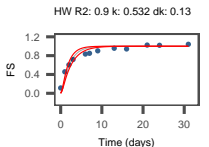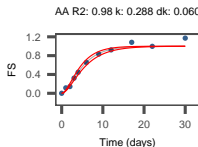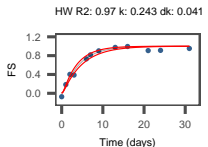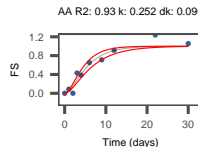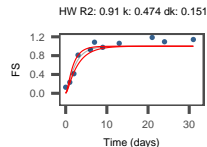

UD11 - VVYSPYGLATEILQK\_2

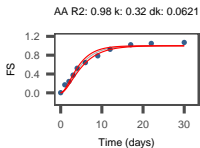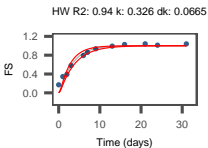

UD2A2(Non-Unique) - IHHDQPVKPLDR\_3

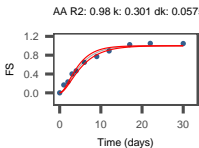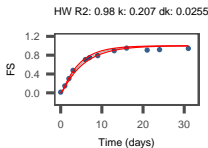

UD2A3 - LNEIANLAVNVIPNLSLWEEAAK\_3

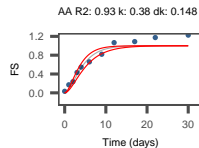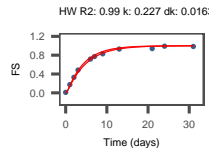

UD11 - VVYSPYGLATEILQK\_3

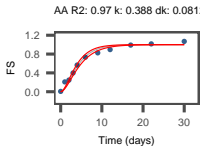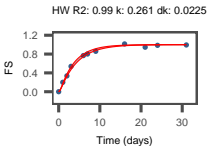

UD2A2(Non-Unique) - IHHDQPVKPLDR\_4

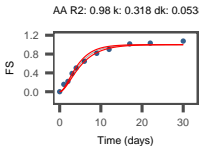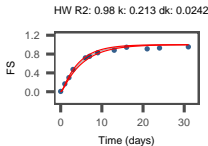

UD3A2 - DIMDFLK\_2

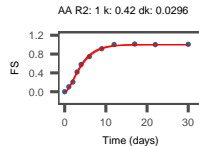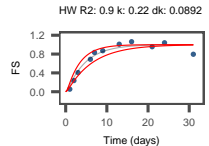

UD12(Non-Unique) - GAGVTNLVLEMTADDLENALK\_2

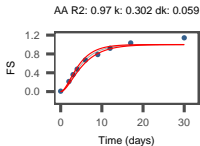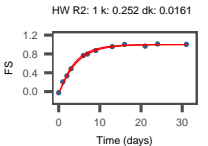

UD2A3 - ANLIASVLAIQPK\_2

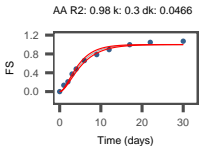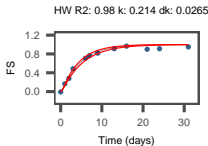

UD3A2 - NFLMFLDFSMK\_2

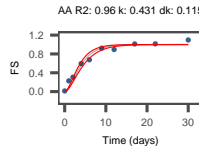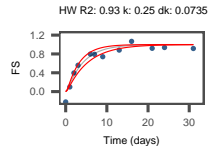

UD12(Non-Unique) - GAGVTNLVLEMTADDLENALK\_3

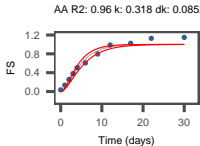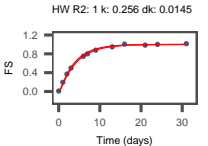

UD2A3 - GHEVTVLK\_2

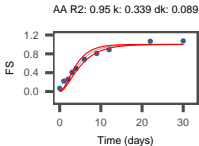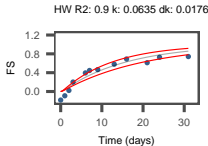

UDB17 - ANAIAWALAIQPK\_3

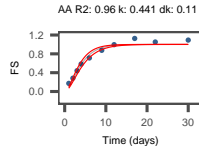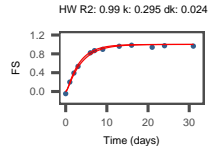

UD16 - GHDIMLVPEVNLGSK\_3

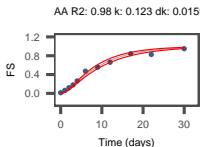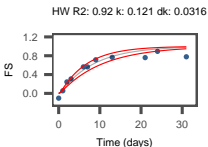

UD2A3 - LFNWIPQNDLLGHPK\_3

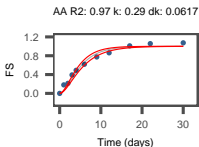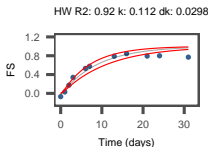

UDB17 - GHEVTLRPSAYYVLDPK\_2

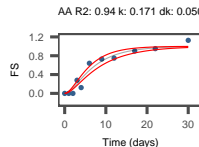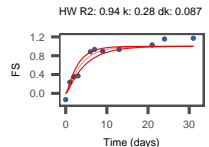

UD2A2(Non-Unique) - IHHDQPVKPLDR\_2

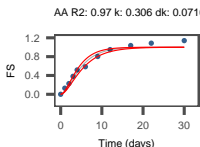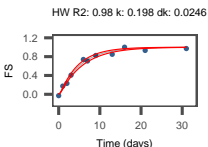

UD2A3 - LNEIANLAVNVIPNLSLWEEAAK\_2

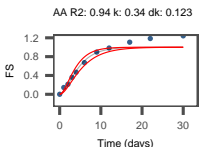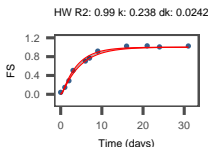

UDB17 - GHEVTLRPSAYYVLDPK\_3

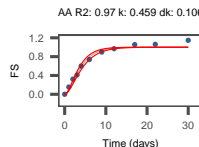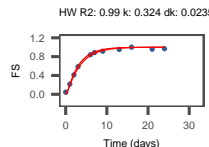

UDB17 - GHEVTLRPSAYYVDPK\_4

UDB17 - SDVLNLEEVIENPFYK\_3

UGDH - ILTTNTWSSELSK\_2

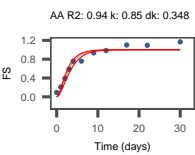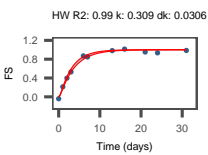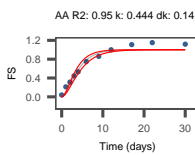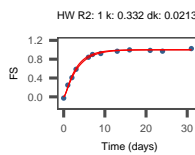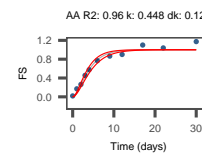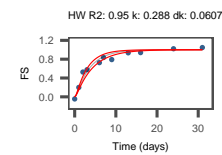

UDB17 - IHHDQPM[15.9949]KPLDR\_4

UDB17 - SNWDLEFPHTLPNVYVGLHCK\_4

UGDH - INAWNPTLPYIEPLK\_2

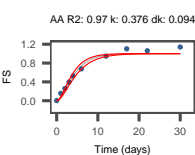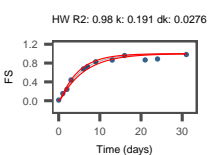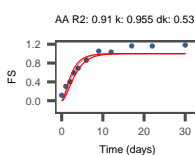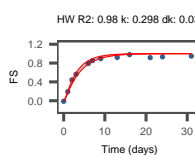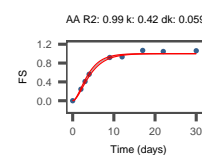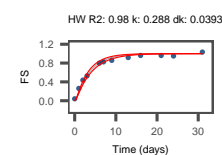

UDB17 - IHHDQPMKPLDR\_2

UDB17 - VLWVPMEFSHWMNIK\_3

UGPA - EFPTVPLVK\_2

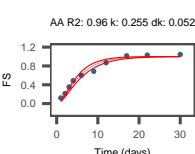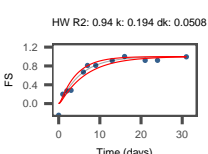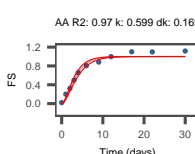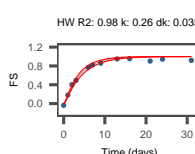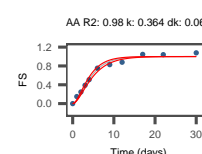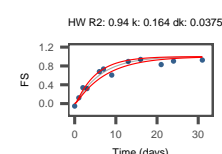

UDB17 - IHHDQPMKPLDR\_3

UGDH - ALVICTEWMFK\_2

UGPA - ILTAASHEFEHTK\_3

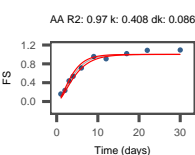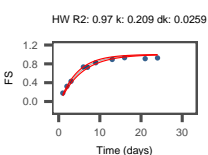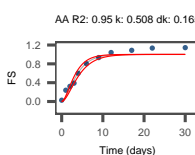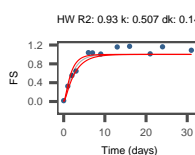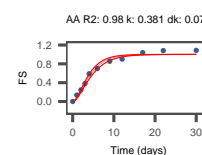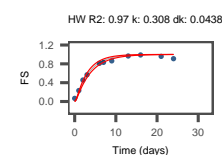

UDB17 - IHHDQPMKPLDR\_4

UGDH - ASVFGGSCFOK\_2

UGPA - IQRPPEDSIQPEYK\_3

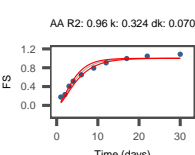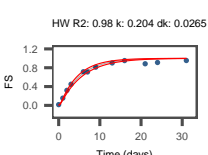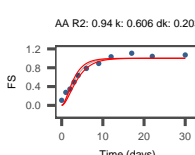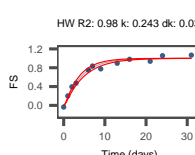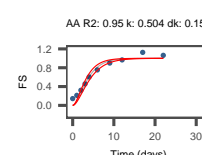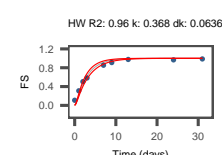

UDB17 - KWDSFYSEYLGK\_3

UGDH - IAILGFAFK\_2

UGPA - LVEIAQVPK\_2

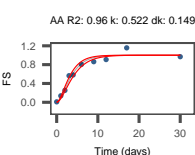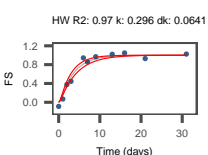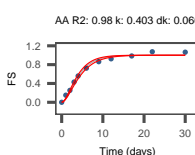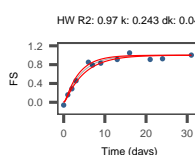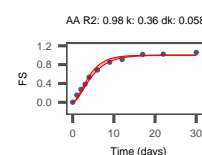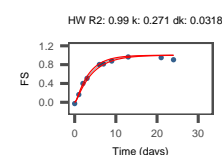





VDAC2 – WCEYGLTFTEK\_2

VINC – QVATALQLNLTQK\_2

AA R2: 0.98 k: 0.23 dk: 0.039

HW R2: 0.97 k: 0.208 dk: 0.042

AA R2: 0.99 k: 0.142 dk: 0.0161

HW R2: 0.91 k: 0.257 dk: 0.0668

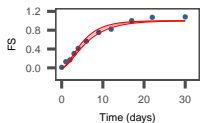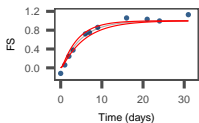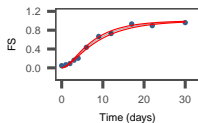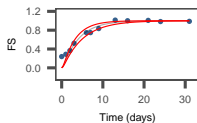

VDAC3(Non-Unique) – LTLALIDGK\_2

WDR1 – YAPSGFYIASGDISGK\_2

AA R2: 0.98 k: 0.214 dk: 0.0354

HW R2: 0.97 k: 0.198 dk: 0.035

AA R2: 0.93 k: 0.157 dk: 0.0468

HW R2: 0.94 k: 0.163 dk: 0.0357

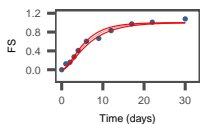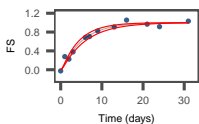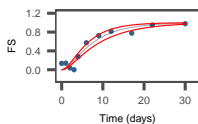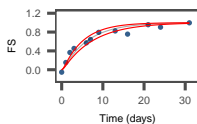

VDAC3 – SCSGVFSTSGHAYDTGK\_3

XDH – AVGEPPLFLASSIFFAIK\_2

AA R2: 0.9 k: 0.0959 dk: 0.0244

HW R2: 0.98 k: 0.191 dk: 0.0259

AA R2: 0.98 k: 0.341 dk: 0.0675

HW R2: 0.97 k: 0.169 dk: 0.0302

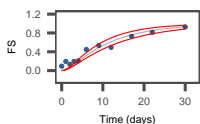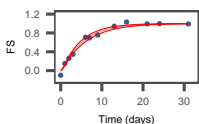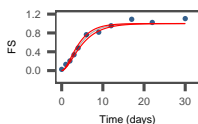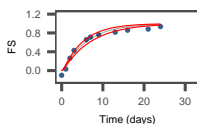

VDAC3 – WNTDNTLGTSEISWENK\_2

XDH – ITYEDLPAITIQDAIK\_2

AA R2: 0.98 k: 0.188 dk: 0.0306

HW R2: 0.98 k: 0.181 dk: 0.0261

AA R2: 0.96 k: 0.196 dk: 0.0462

HW R2: 0.98 k: 0.32 dk: 0.0394

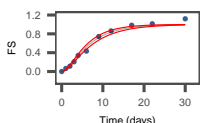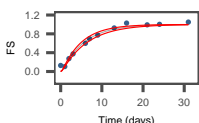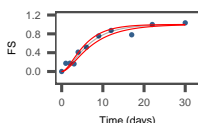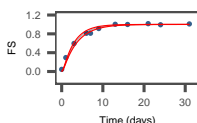

VIGLN – AACLESAQEPAGAWSNK\_2

XDH – ITYEDLPAITIQDAIK\_3

AA R2: 0.93 k: 1.09 dk: 0.598

HW R2: 0.99 k: 0.682 dk: 0.0706

AA R2: 0.95 k: 0.197 dk: 0.0545

HW R2: 0.99 k: 0.299 dk: 0.0333

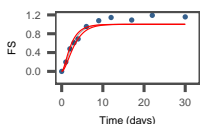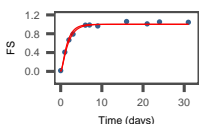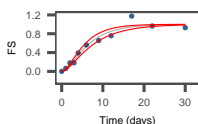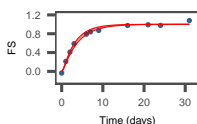

VIGLN – IEGDPGVQQAQK\_2

AA R2: 0.98 k: 0.793 dk: 0.19

HW R2: 0.97 k: 0.613 dk: 0.0863

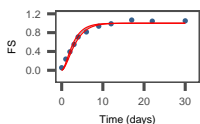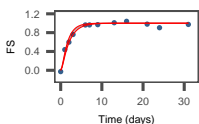

Supplement: mmc4.pdf [file mmc4.pdf]
