# Supplementary material for: Harmonizing Labeling and Analytical Strategies to Obtain Protein Turnover Rates in Intact Adult Animals
Source: PubMed Central journal article supplement (PMC9249856; doi:10.1016/j.mcpro.2022.100252), 2022-05-28

ACON - DINQEVYNFLATAGAK\_3

ACON - SDFDPGQDTYQHPPK\_3

ACTN2 - LLETIDLHLFEAK\_3

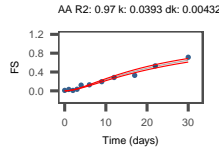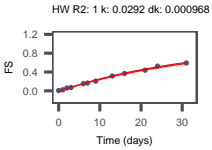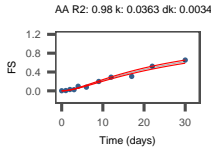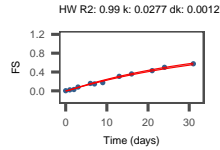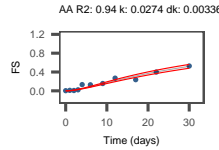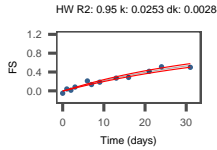

ACON - DLEDLQILIK\_2

ACON - VAGILTVK\_2

ACTN2 - QSILAIQNEVEK\_2

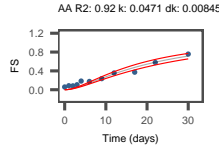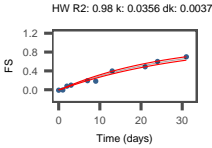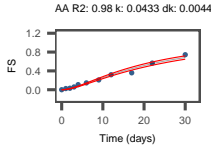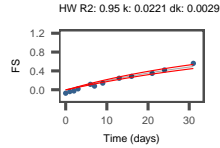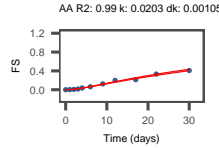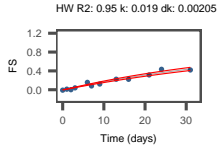

ACON - FNPETDFTLGK\_2

ACON - VAVPSTHCDHLIEAQVGGEK\_3

ACTN2 - SSIQITGALEDQMNQLK\_3

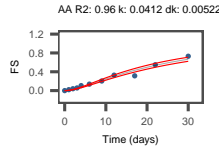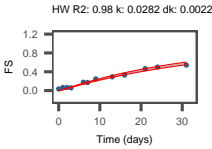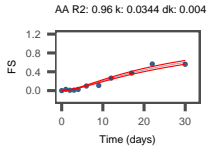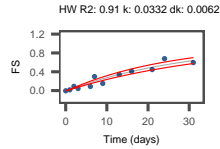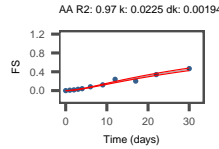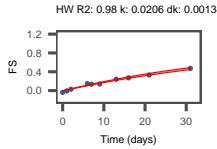

ACON - LNRPLTSEK\_3

ACTN2 - AIGPWQNK\_2

ACTN3 - CQAICDQWDNLGTLTQK\_3

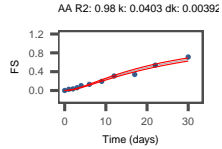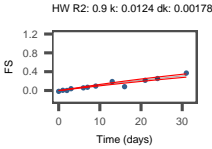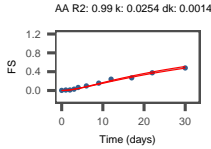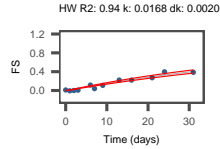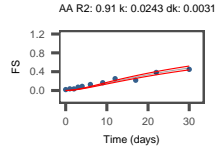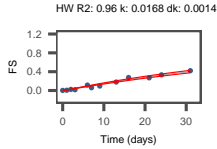

ACON - LQLLEPFDK\_2

ACTN2 - ASTHETWAYGK\_3

ACTN3(Non-Unique) - CQLEINFNTLQTK\_3

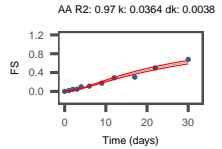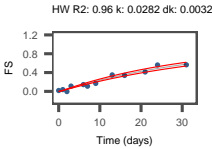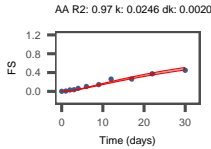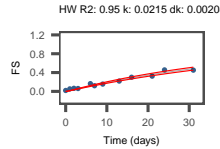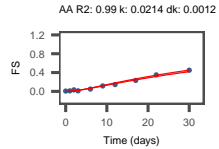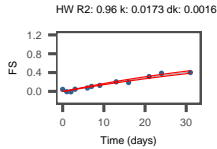

ACON - LTGSLSGWTSPK\_2

ACTN2 - ILASDKPYLAELR\_3

ACTN3 - DDPIGNLNTAFEVAEK\_2

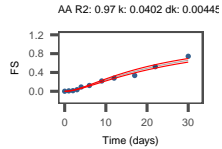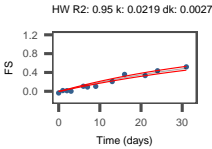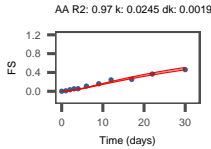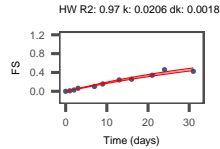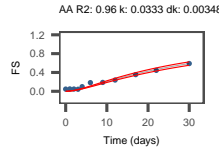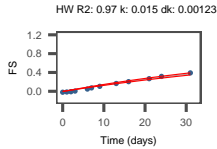

**ACTN3 – ETAETDTAEVQVASF\_K\_3**

**ACTN3 – QREQNINYK\_2**

**ALBU – AETFTFHSDICTLPEK\_3**

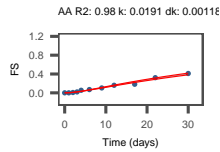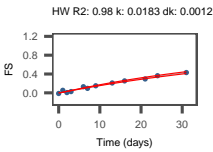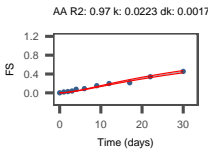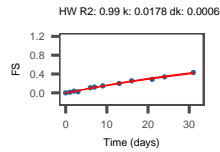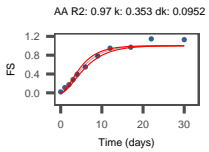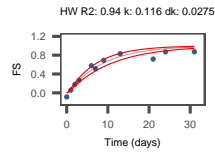

**ACTN3(Non-Unique) – FAIQDISVEETSAK\_2**

**ACTN3 – VLAVNQENEK\_2**

**ALBU – ENYGELADCCTK\_2**

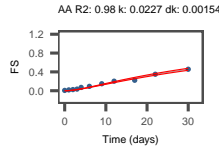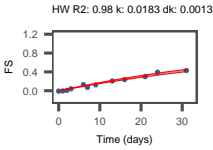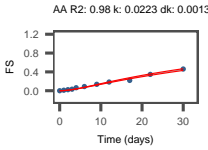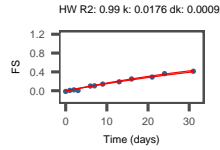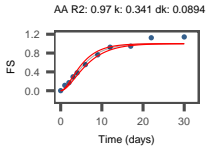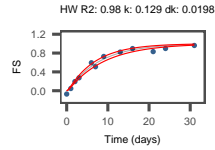

**ACTN3 – GAILGIQGEIQK\_2**

**ACTN4(Non-Unique) – KHEAFESDLAAHQDR\_4**

**ALBU – GLVLIAFSQYLQK\_2**

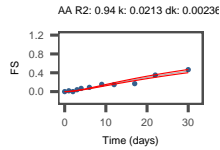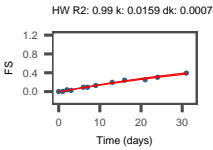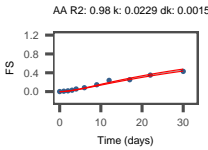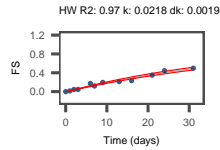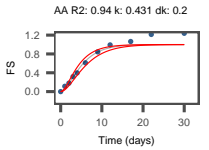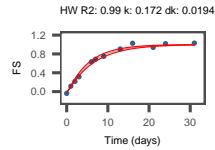

**ACTN3 – LMEEYEK\_2**

**ADT1 – DEGANAFFK\_2**

**ALBU – LATDLTK\_2**

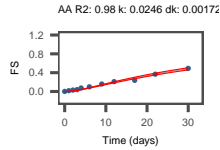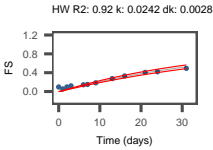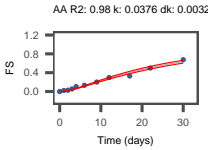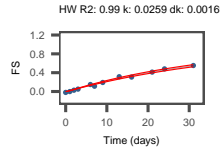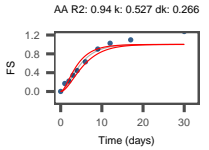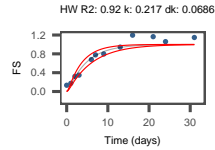

**ACTN3 – NVNQNFHTSWK\_3**

**ADT1(Non-Unique) – LLLQVQHASK\_2**

**ALBU – LSQTFPNADFAEITK\_2**

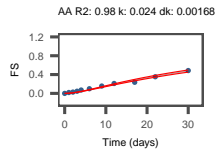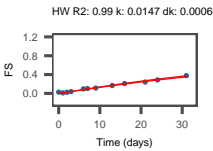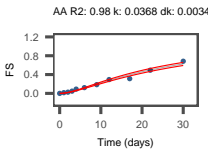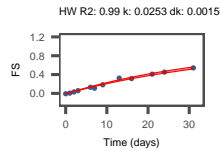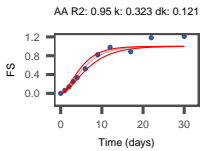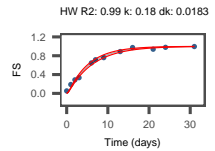

**ACTN3(Non-Unique) – PAFMPSEK\_2**

**ADT1(Non-Unique) – LLLQVQHASK\_3**

**ALBU – LVQEVTDFAK\_2**

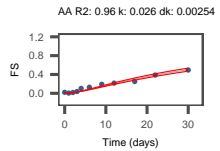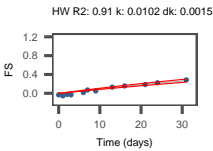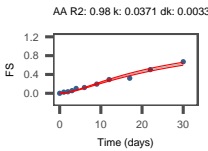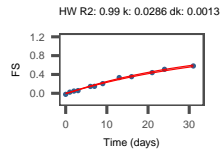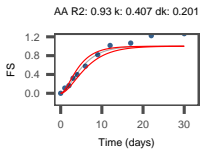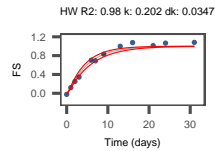

ALBU - QTALAEVVK\_2

ALBU - YMCENQATISSK\_2

ALDOA - PHPYPALTPEQK\_2

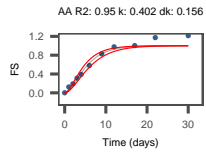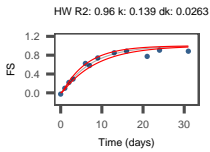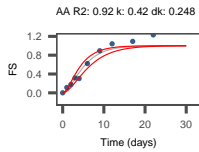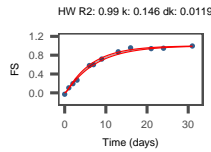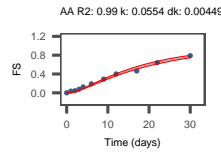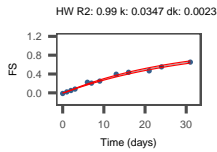

ALBU - RPCFSALTVDETYVPK\_2

ALBU\_HUMAN,sp|P07724|ALBU(Non-Unique) - NECFLGHK\_3

ALDOA - PHPYPALTPEQK\_3

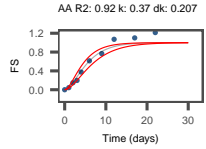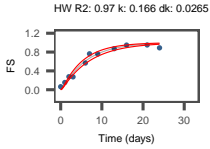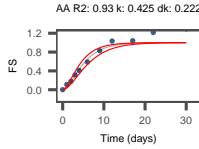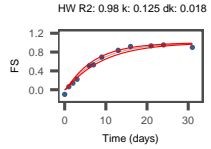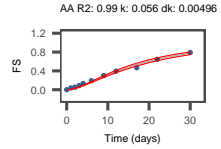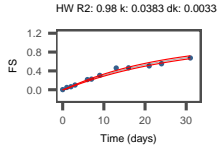

ALBU - TCVAESAAACDK\_2

ALBU\_HUMAN,sp|P07724|ALBU(Non-Unique) - SLHTLFGDK\_2

ALDOA\_RABIT,sp|P05063|ALDOA(Non-Unique) - VLAAYVK\_2

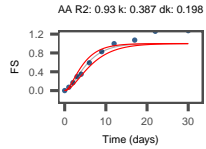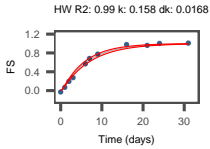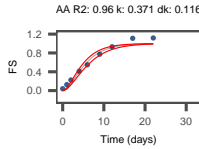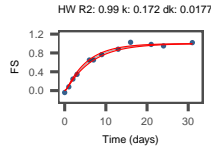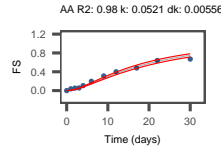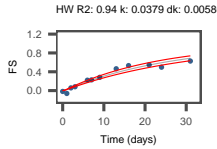

ALBU - TNCDLYEK\_2

ALDH2 - LGPALATGNVVMK\_2

ALDOA\_RABIT,sp|P05064|ALDOA(Non-Unique) - ADDGRFPQVIK\_2

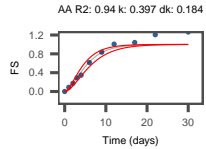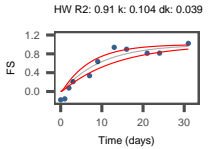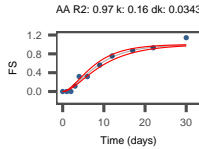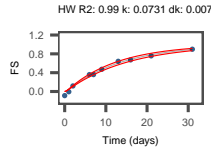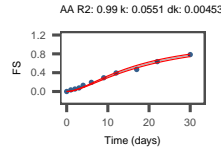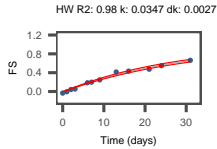

ALBU - TVMDDFAQLDTCCK\_2

ALDOA - AAQEEYIK\_2

ALDOA\_RABIT,sp|P05064|ALDOA(Non-Unique) - ALQASALK\_2

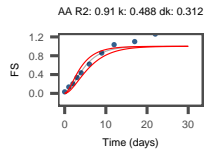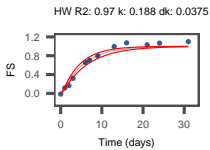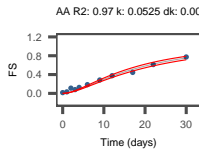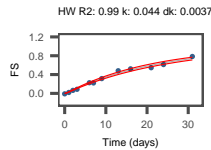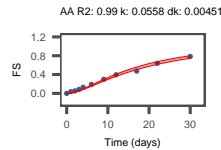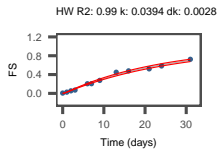

ALBU - TVMDDFAQLDTCCK\_3

ALDOA - AAQEEYIKR\_3

ALDOA\_RABIT,sp|P05064|ALDOA(Non-Unique) - CPLLPKW\_2

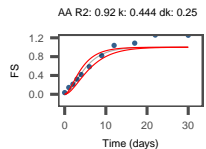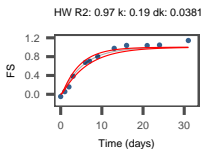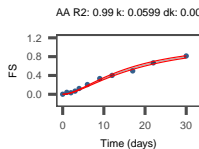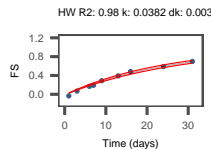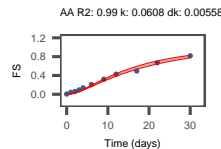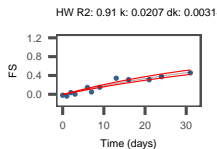

ALDOA\_RABIT,sp|P05064|ALDOA(Non-Unique) - CPLLKPWAL\_ALDOA\_RABIT,sp|P05064|ALDOA(Non-Unique) - LSGGGSEEEASINLNAIK\_2

ALDOC(Non-Unique) - ALSDDHHVLEGTLLKPN\_4

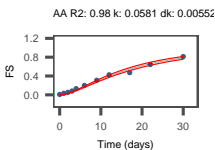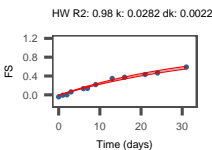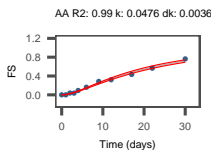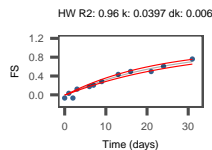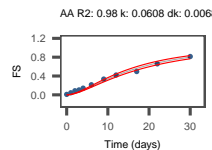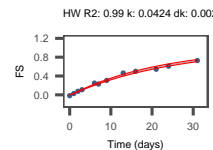

ALDOA\_RABIT,sp|P05064|ALDOA(Non-Unique) - CPLLKPWALTF\_2

ALDOA\_RABIT,sp|P05064|ALDOA(Non-Unique) - MVTPGHACTQK\_2

ALDR - LIEYCHSK\_3

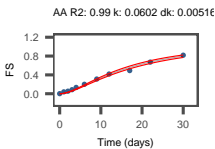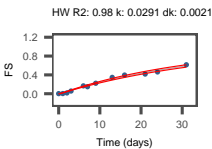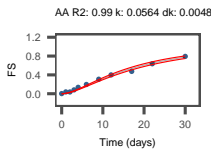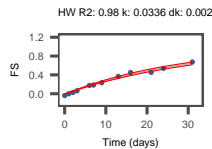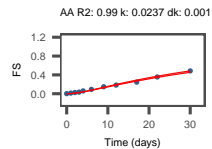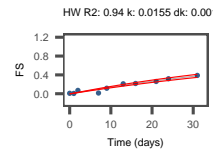

ALDOA\_RABIT,sp|P05064|ALDOA(Non-Unique) - GILAADESTGSIK\_2 ALDOA\_RABIT,sp|P05064|ALDOA(Non-Unique) - MVTPGHACTQK\_3

AMPD1 - NIDGELVGNESFYVFTPPPK\_2

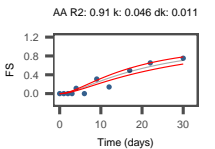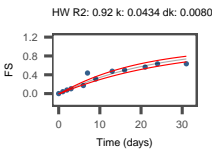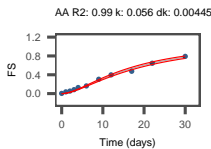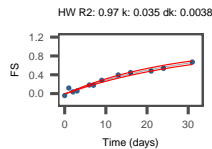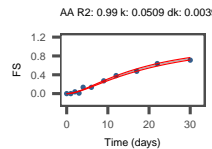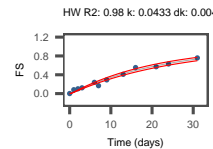

ALDOA\_RABIT,sp|P05064|ALDOA(Non-Unique) - IGGVILFHETLQYKALDOA\_RABIT,sp|P05064|ALDOA(Non-Unique) - TVPPAVTGVTFLSGGGSEEEASINLNAIK\_4

AMPD1 - NPFLDLQK\_2

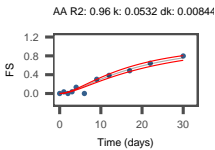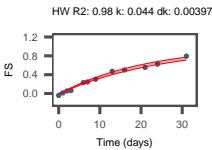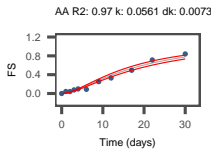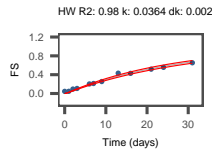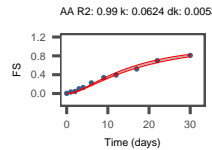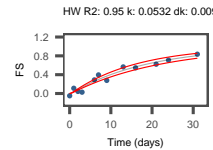

ALDOA\_RABIT,sp|P05064|ALDOA(Non-Unique) - IGGVILFHETLYQKALDOA\_RABIT,sp|P05064|ALDOA(Non-Unique) - VNPCIIGVILFHETLYQK\_2

AMPD1 - TEDLPANLGYHLK\_3

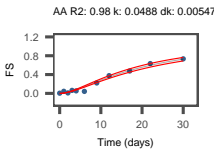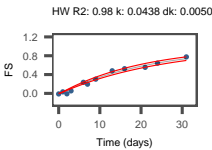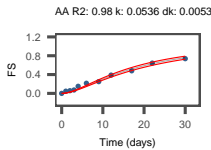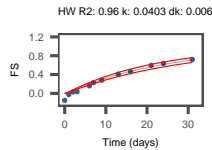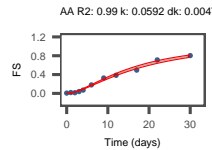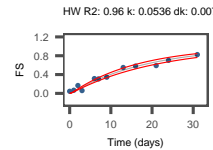

ALDOA\_RABIT,sp|P05064|ALDOA(Non-Unique) - KELSIAHR\_3

ALDOC(Non-Unique) - ALSDDHHVLEGTLLKPN\_2

AMPD1 - TVNLSIPQSETSTK\_2

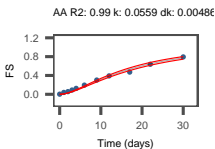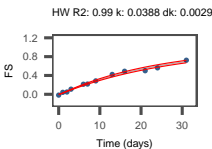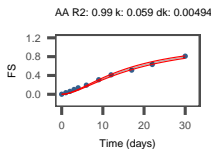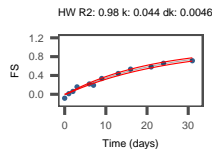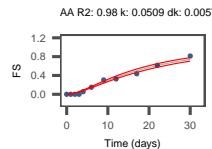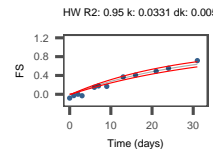

ANXA6 – DAFVAIVQSVK\_2

AT2A1 – IRDQMAATEQDK\_2

AT2A1 – YGPNELPAEEGK\_2

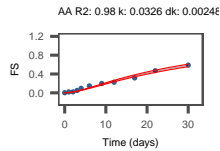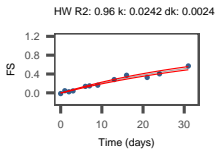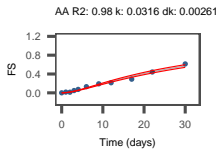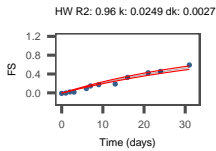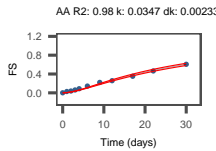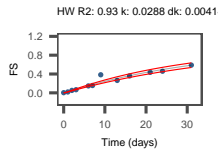

ARF3(Non-Unique) – DAVLLVFANK\_2

AT2A1 – ISLPIGLDELLK\_2

AT2A2(Non-Unique) – GAIYYFK\_2

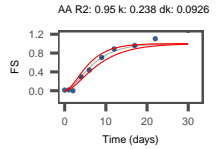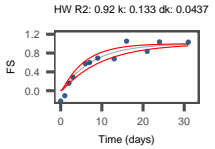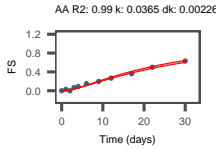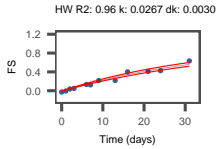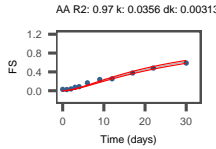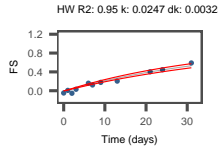

AT1A3(Non-Unique) – QGAIVAVTGDGVNDSPALK\_2

AT2A1 – REEMVLDDSAK\_2

AT2A2(Non-Unique) – KEFTLEFSR\_3

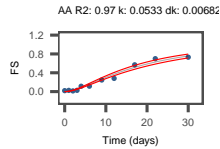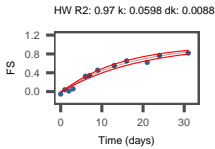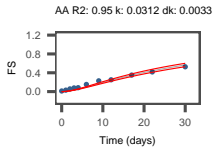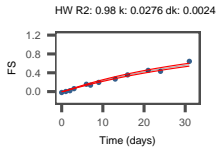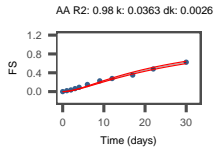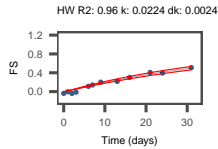

AT2A1 – ALDFTQWLMLVK\_2

AT2A1 – SITGSTYAPEGEVLK\_2

AT2A2(Non-Unique) – LDFEGEQLSK\_2

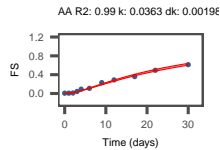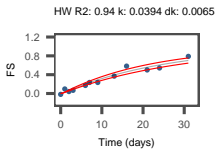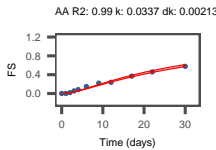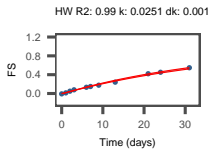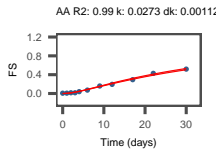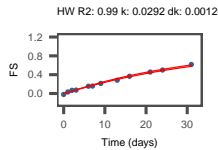

AT2A1 – CNDSSLDFNK\_2

AT2A1 – SMSVYCPAK\_2

AT2A2(Non-Unique) – TGDGVNDAPALK\_2

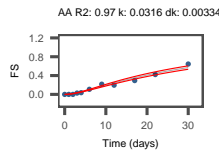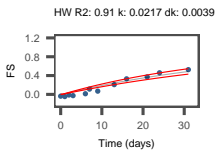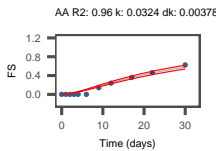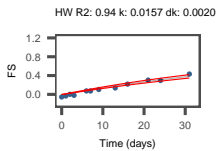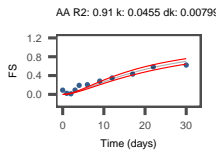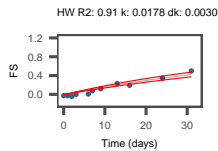

AT2A1 – EEMVLDDSAK\_2

AT2A1 – VPLTGPVK\_2

AT2A2(Non-Unique) – VDQSILTGESVVIK\_3

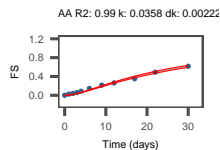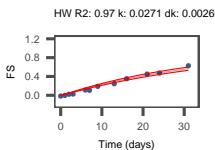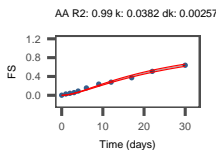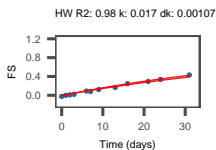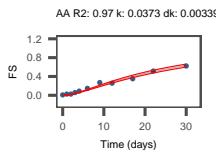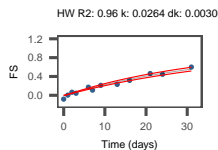

AT2A3(Non-Unique) – DIVPGDIVEAVGDKVPADLR\_2

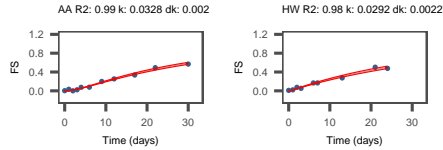

ATPA – GMSLNLPEPDNGVVVFGNDK\_3

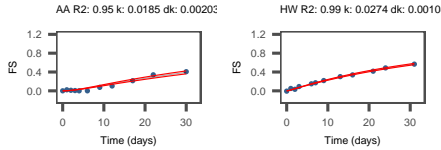

ATPB – FLSQPQVAEVFTGHMGK\_3

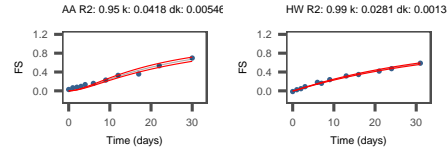

AT2A3(Non-Unique) – DIVPGDIVEAVGDKVPADLR\_3

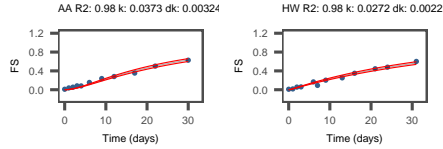

ATPA – HALIYYDLSK\_2

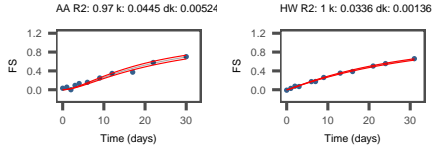

ATPB – IGLFGGAVGK\_2

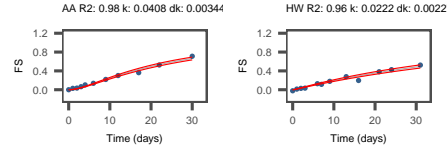

AT5F1 – PLPPLPEYGGK\_2

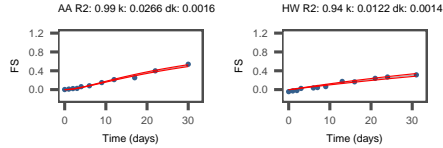

ATPA – LKEIVTNFLAGFEP\_2

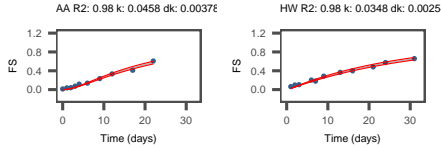

ATPB – TVLIMELINNAK\_2

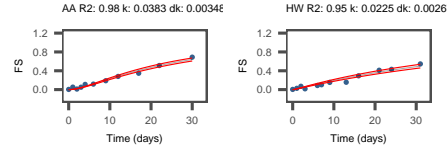

ATP5H – TIDWVSFVEVMPQNK\_3

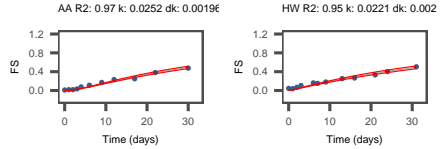

ATPA – NVQAEEMVFSSGLK\_3

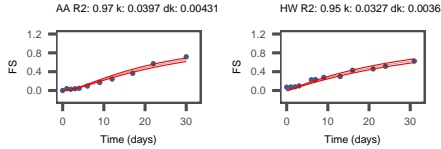

ATPD – IEANEALVK\_2

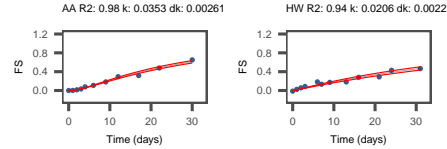

ATP5J – FEVIDKQS\_2

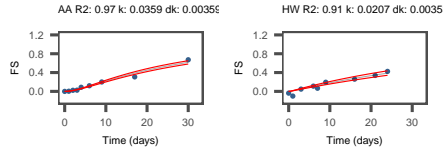

ATPA – TSAIDTINQK\_3

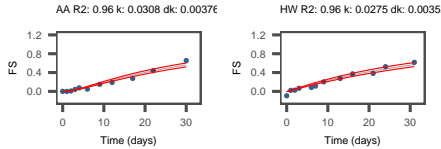

ATPG – THSDQLVFSK\_3

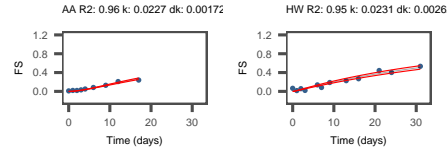

ATPA – GMSLNLPEPDNGVVVFGNDK\_2

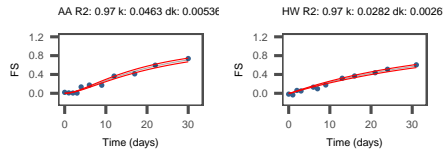

ATPA – VVDALGNAIDGK\_2

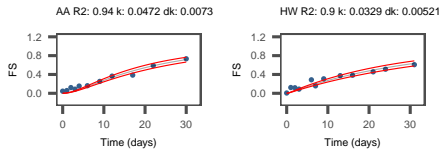

ATPO – YATALYSAASK\_2

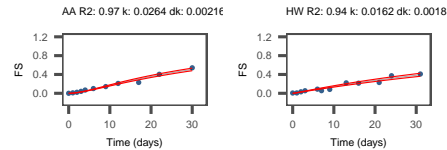

BIN1 – HHYESLQTAQ\_3

CAH3 – HDPSLQPWSAYSDPGSAK\_2

CH60 – ALMLQGVDLLADAVAVTMGPK\_3

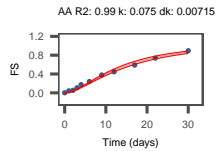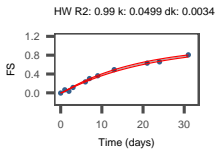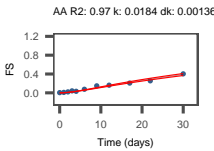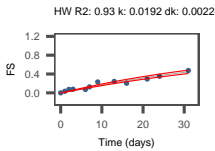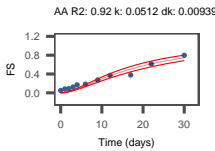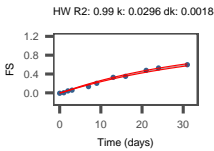

BIN1 – IAENNDLLWMDYHQK\_3

CAH3 – YAAELHLVHWNPK\_3

CMC1 – IVQLLAGVADQTK\_2

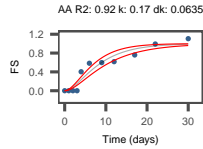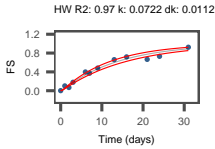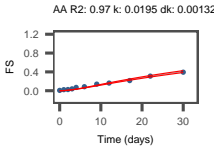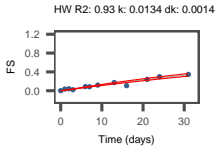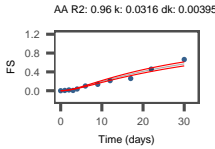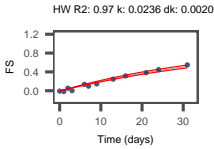

BIN1 – LDLPGFMFK\_2

CAH3 – YAAELHLVHWNPK\_4

CMC1 – YLGLYNDPNSNPK\_2

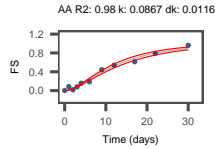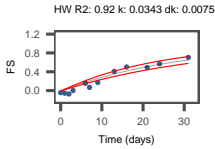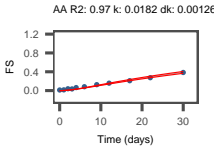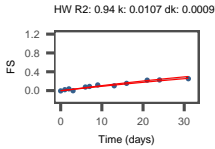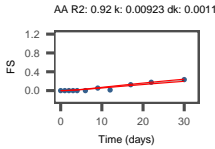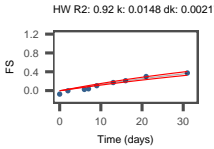

BIN1 – LNQLNDLVLSLEK\_2

CALM1(Non-Unique) – VFDKDNGYISAAELR\_3

COF1(Non-Unique) – YALDYATYETK\_2

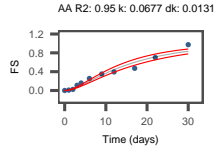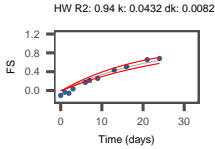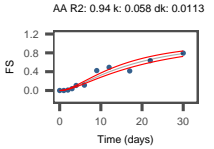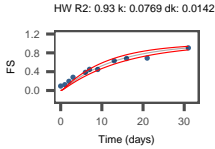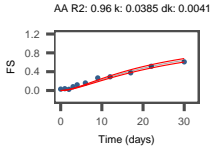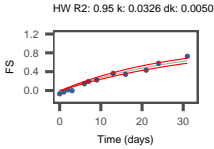

CAH3 – EPMTVSSDMAK\_2

CH10 – VLQATVAVGSGGK\_2

COF2 – LGGSVVSLGKPL\_2

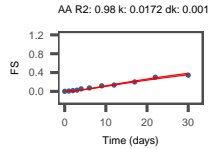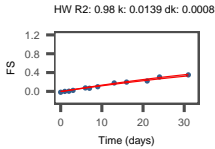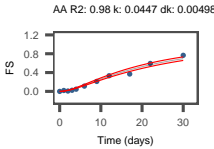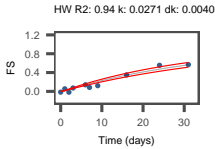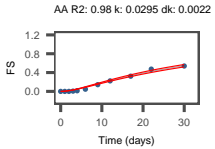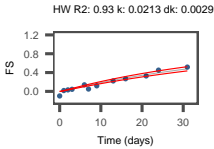

CAH3 – GDNQSPIELHTK\_2

CH10 – VVLLDKDYFLFR\_3

COQ9 – LVLQGAEK\_2

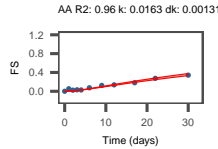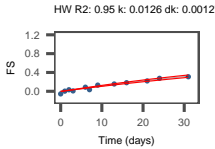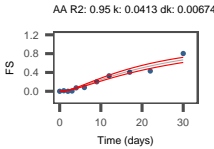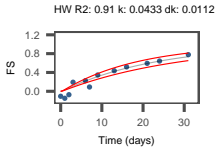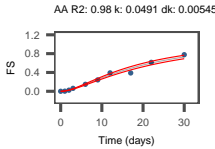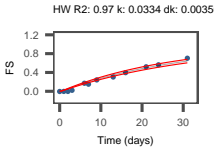



COQ9 - STGEALVQGLMGAATLK\_2

COX5B - EDPNLVPSISNK\_2

DDX3L(Non-Unique) - SFLDLLLNATGK\_2

AA R2: 0.97 k: 0.027 dk: 0.0024

HW R2: 0.92 k: 0.0294 dk: 0.0057

AA R2: 0.99 k: 0.0352 dk: 0.00226

HW R2: 0.97 k: 0.0246 dk: 0.0019

AA R2: 0.99 k: 0.33 dk: 0.0394

HW R2: 0.96 k: 0.187 dk: 0.0352

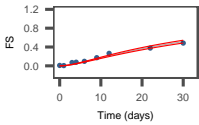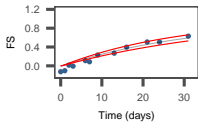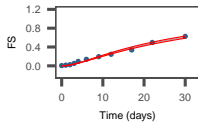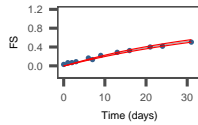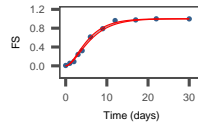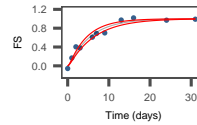

COQ9 - STGEALVQGLMGAATLK\_3

COX6C - NYDSMKDFEEMR\_3

DESM - HGIQSYTCEIDALK\_3

AA R2: 1 k: 0.0445 dk: 0.00209

HW R2: 0.94 k: 0.0339 dk: 0.0067

AA R2: 0.94 k: 0.0278 dk: 0.00381

HW R2: 0.91 k: 0.0227 dk: 0.0040

AA R2: 0.97 k: 0.228 dk: 0.0483

HW R2: 0.97 k: 0.0564 dk: 0.0079

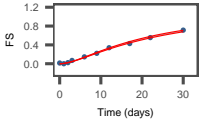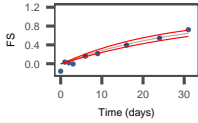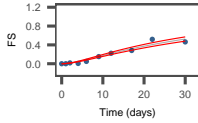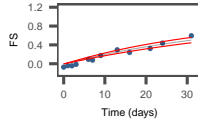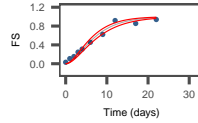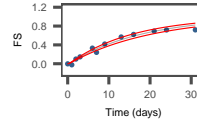

COX41 - DWVAMQTK\_2

CPT1B - QALLDIAELFK\_2

DESM - VSDLTQAANK\_2

AA R2: 0.98 k: 0.0263 dk: 0.0015

HW R2: 0.94 k: 0.0222 dk: 0.0030

AA R2: 0.98 k: 0.0548 dk: 0.00617

HW R2: 0.99 k: 0.0452 dk: 0.0024

AA R2: 0.97 k: 0.168 dk: 0.0355

HW R2: 0.94 k: 0.101 dk: 0.0197

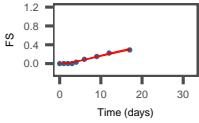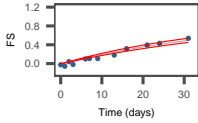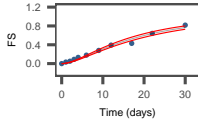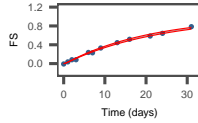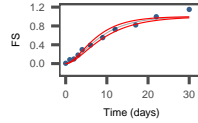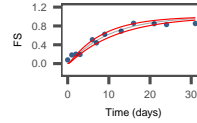

COX41 - DYPLPDVAHVMTLSASQK\_3

CPT1B - SPLMVNSNYAMDFVLK\_2

LDLH - ALTGGIAHLFK\_3

AA R2: 0.98 k: 0.0332 dk: 0.00246

HW R2: 1 k: 0.0262 dk: 0.000882

AA R2: 0.98 k: 0.0704 dk: 0.00811

HW R2: 0.96 k: 0.0331 dk: 0.0043

AA R2: 0.97 k: 0.027 dk: 0.00222

HW R2: 0.94 k: 0.0178 dk: 0.0023

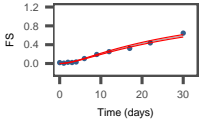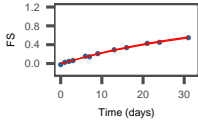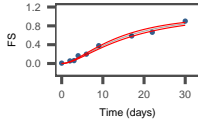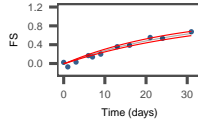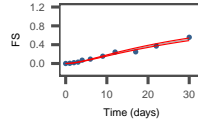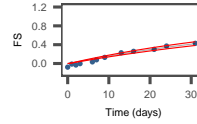

COX5A - GMNTLVGYDLVPEPK\_2

CRYAB - VLGDVIEVHGK\_3

LDLH - EANLAAAFGK\_2

AA R2: 0.98 k: 0.0431 dk: 0.00397

HW R2: 0.91 k: 0.0198 dk: 0.0033

AA R2: 0.98 k: 0.214 dk: 0.0419

HW R2: 0.95 k: 0.131 dk: 0.0298

AA R2: 0.96 k: 0.0211 dk: 0.00206

HW R2: 0.94 k: 0.0206 dk: 0.0021

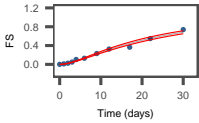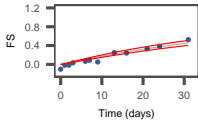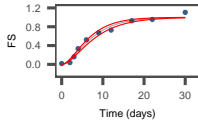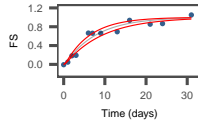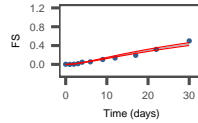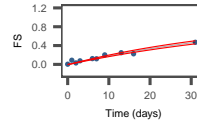

COX5A - NKPDDIAWELR\_3

CYC - TGQAAGFSYTDANK\_2

LDLH - IPNIYAIGDVVAGPMLAHK\_3

AA R2: 0.98 k: 0.0393 dk: 0.00406

HW R2: 0.97 k: 0.0219 dk: 0.0019

AA R2: 0.97 k: 0.0326 dk: 0.00315

HW R2: 0.97 k: 0.0246 dk: 0.0018

AA R2: 0.98 k: 0.0272 dk: 0.00196

HW R2: 0.97 k: 0.018 dk: 0.00168

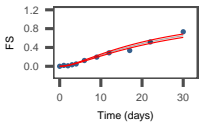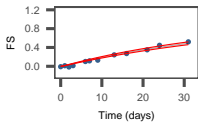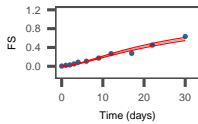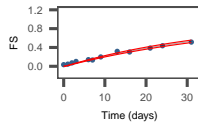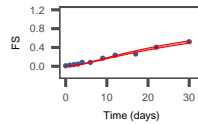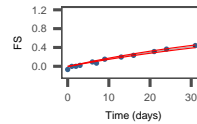

**ECHA – MGLVDQLVEPLGPIK\_2**

**ECHB – DVVDYIFGTVIQEVK\_2**

**EF1A2 – PGMVVTFAPVNITTEVK\_2**

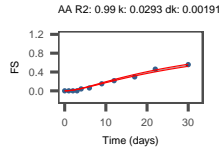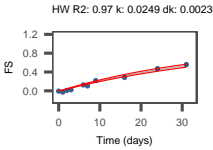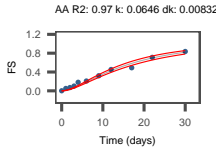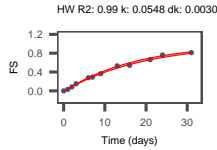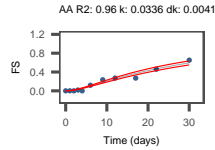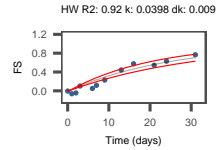

**ECHA – MGLVDQLVEPLGPIK\_3**

**ECHB – DVVDYIFGTVIQEVK\_3**

**EF1A2 – VETGILRPGMVVTFAPVNITTEVK\_3**

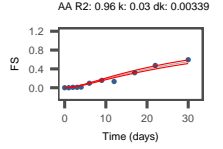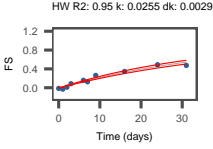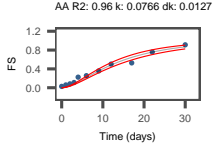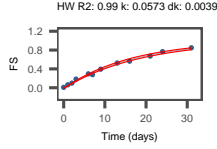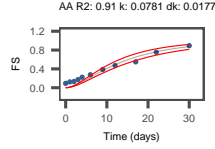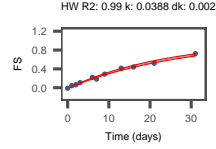

**ECHA – MQLLEITTDK\_2**

**EC1 – ALQLGTLFSPAALK\_2**

**EF2 – DSVVAGFWATK\_2**

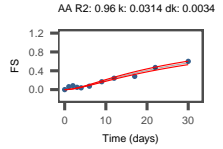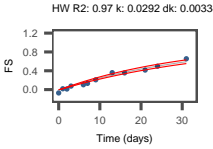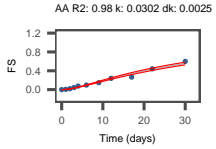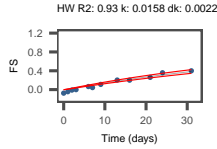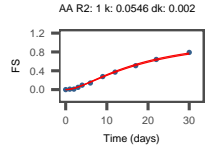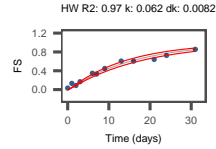

**ECHA – NVQQLAILGAGLMGAGIAQVSDVK\_3**

**EF1A1(Non-Unique) – LPLQDVYK\_2**

**EF2 – EGIPALDNFLDKL\_2**

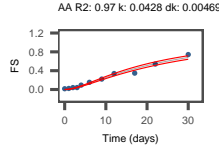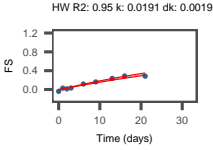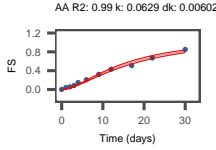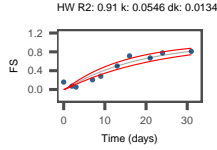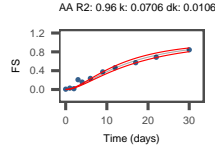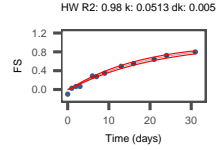

**ECHB – AMIVEAYPK\_2**

**EF1A1(Non-Unique) – STTTGHLIYK\_2**

**EF2 – IVGLVGDQFLVK\_2**

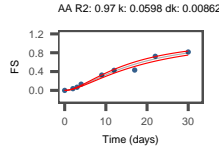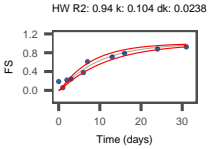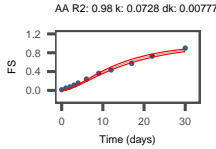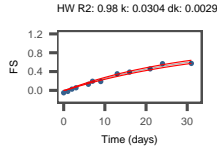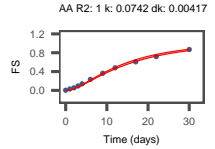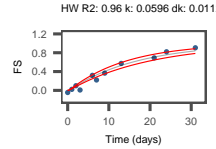

**ECHB – DQLLLGPTYATPK\_2**

**EF1A2 – MDSTEPAYSEK\_2**

**EF2 – IWFCPGDGTGNILTDITK\_2**

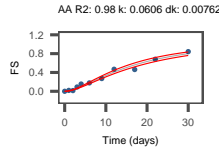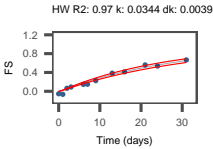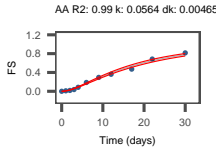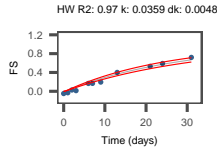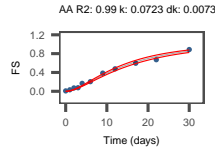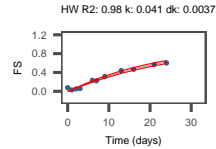

EFTU – DLDKFPLLPVESVYSIPGR\_3

ENOB – IGAEVYHHLK\_2

ENPL(Non-Unique) – ELISNASDALDK\_2

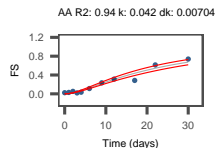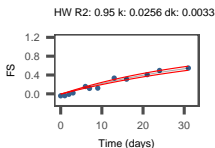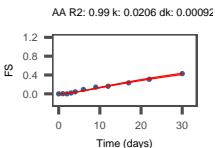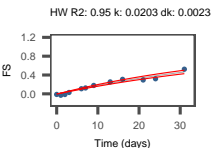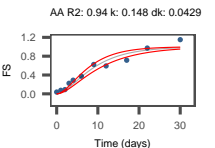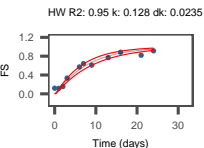

ENOA(Non-Unique) – AILGVS LAVCK\_2

ENOB – IGAEVYHHLK\_3

ETFA – GTSFEAAATSGGSASSEK\_2

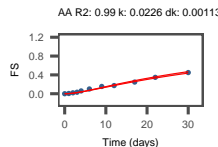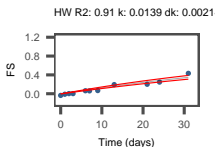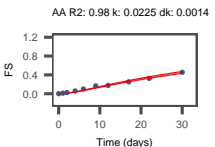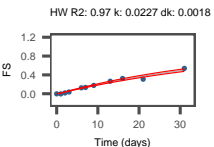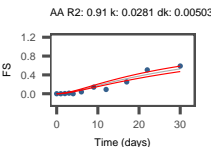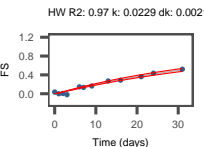

ENOA(Non-Unique) – SGETEDTFIADLVGLCTGQIK\_2

ENOB – ILPVGASSFK\_2

ETFA – LNVAPVSDIIEK\_2

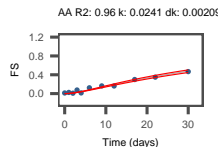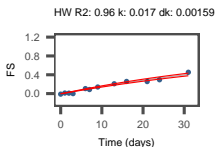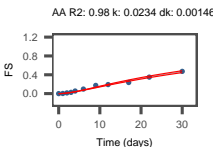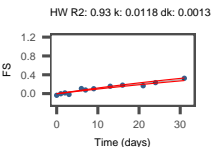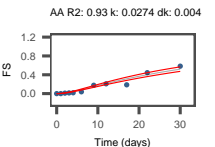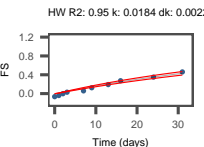

ENOB – GNPTVEVDLHTAK\_2

ENOB – LAMQEFMILPVGASSFK\_3

ETFA – SDRPELTGAK\_3

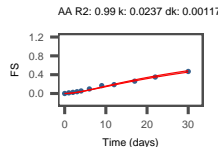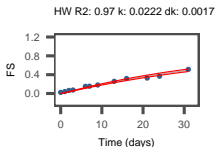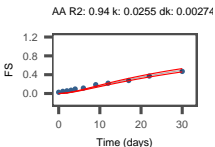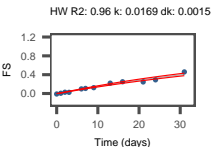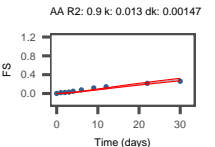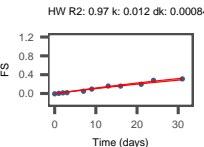

ENOB – GNPTVEVDLHTAK\_3

ENOB – LSGVDIQVGDLLTVNPK\_2

ETFD – ALNEGGLQSIK\_2

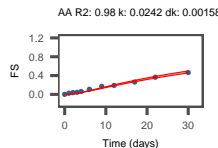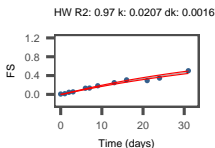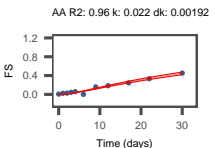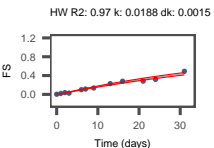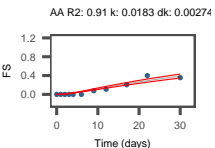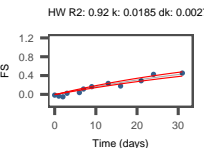

ENOB – IEEALGDK\_2

ENOB – LSVVDQEK\_2

FABP4 – LVSSNFDDYMK\_2

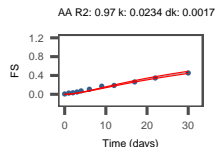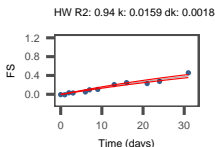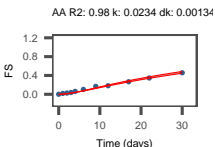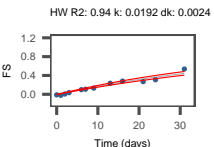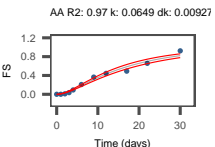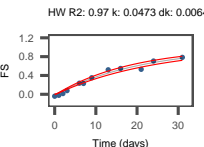

FHL1 – AIVAGDQNVVEYK\_2

FLNB(Non-Unique) – LLGWIQNK\_2

G3P – IIPASTGAAK\_2

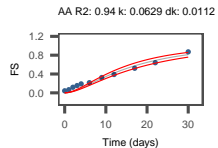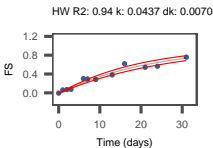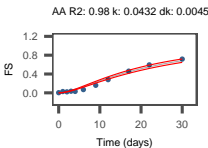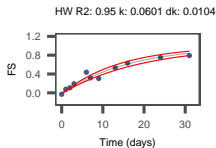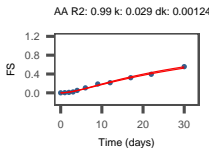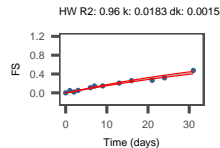

FHL1 – CLHPLASETFVSK\_3

FLNC – GPGLSQAFVGGK\_2

G3P – MFQYDSTHGK\_2

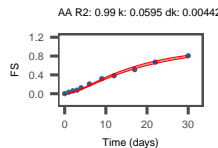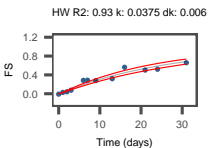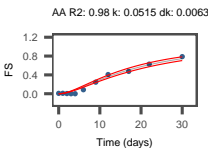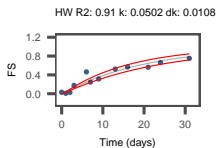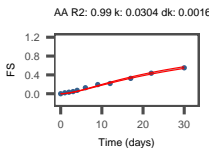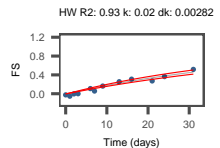

FHL1 – FTAVEDQYVCDCYK\_2

FLNC – SPFVNVVAPPLDSLK\_2

G3P – MFQYDSTHGK\_3

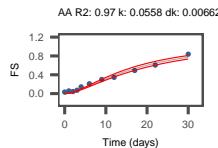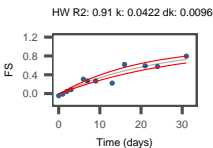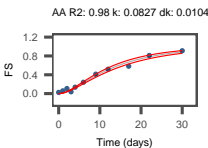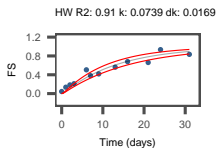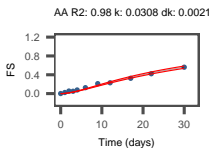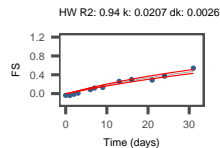

FHL1 – FVFHNEQYVPCDAK\_2

FLNC – TPCEEVYVK\_2

G3P – VIISAPSADAPM[15.9949]FVMGVNHEK\_3

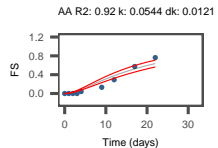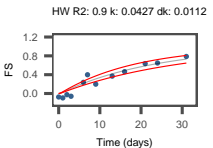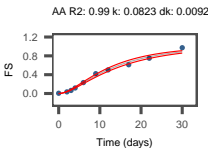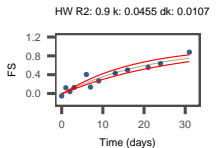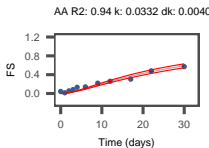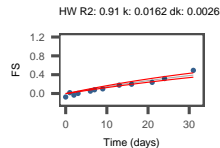

FHL1 – FVFHNEQYVPCDAK\_3

FLNC – TSQLNVGTSTVSLK\_2

G3P – VIISAPSADAPMFVMGVNHEK\_2

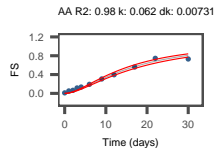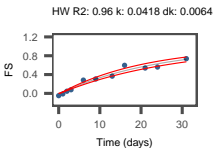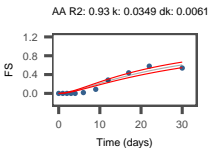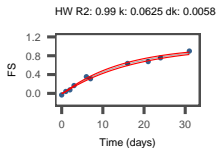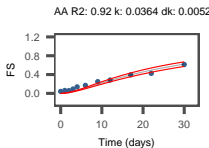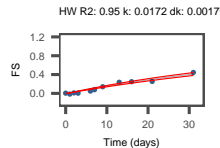

FLNB(Non-Unique) – DLAEDAPWK\_2

FUMH – AAAEVNQEYGLDPK\_2

G3P – VIPELNGK\_2

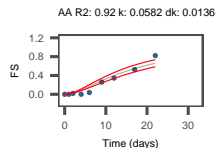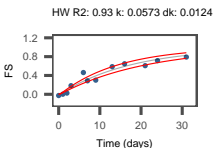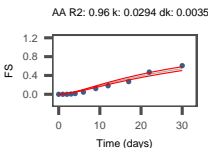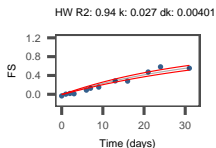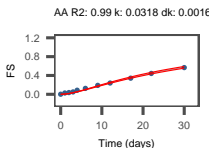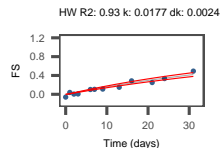

G6PI – EVMQMLVELAK\_2

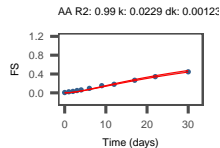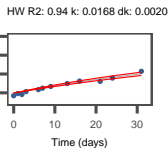

GPDA – LTEINTQHENVK\_3

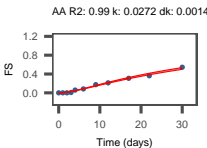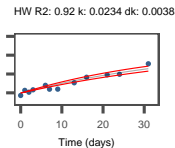

GYS1 – LYESLLVGLSPDMNK\_2

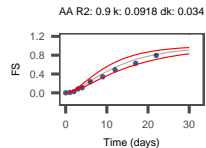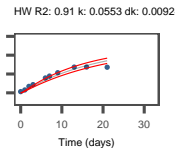

G6PI – EWFLEAAK\_2

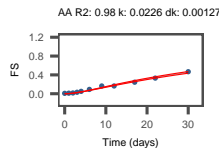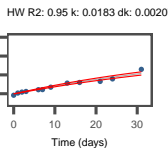

GRP75 – EQQVIQSSGGLSK\_2

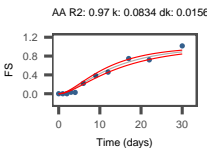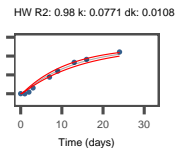

GYS1 – VGGIYTVLQTK\_2

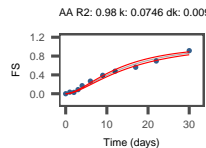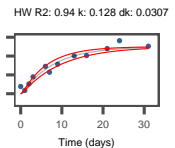

G6PI – ILLANFLAQTEALMK\_2

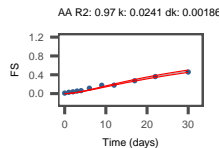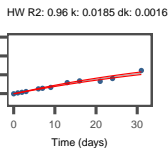

GRP75 – QAASSLQQASLK\_2

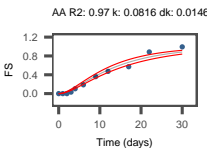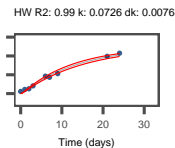

H12(Non-Unique) – ALAAAGYDVEK\_2

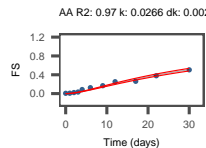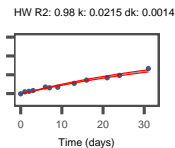

G6PI – TLASLSPETSLFIASK\_2

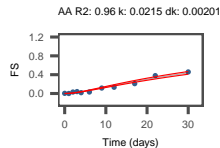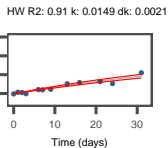

GSTM1(Non-Unique) – LGLDFPNLPYLIDGSHK\_3

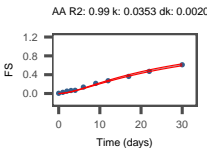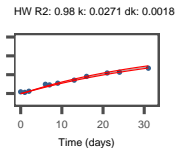

H12(Non-Unique) – ASGPPVSELITK\_2

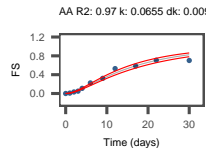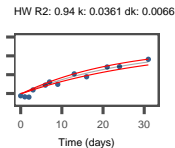

G6PI – VWFVSNIDGTHIAK\_3

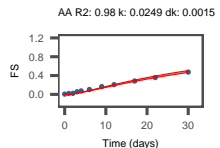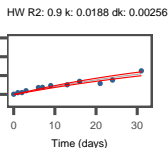

GSTM1 – YIATPIFSK\_2

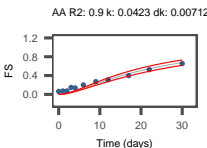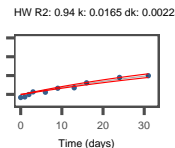

H2A1B(Non-Unique) – VTIAQGGVLPNIQAVLLPK\_2

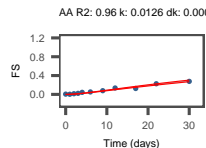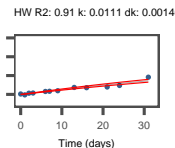

GLYG – WEQQGADYMGADSFNIK\_2

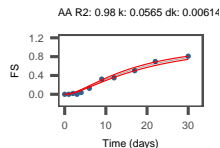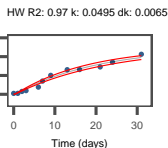

GSTP1\_HUMAN,sp|P19157|GSTP1(Non-Unique) – MLLADQGQSWK\_2

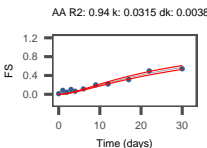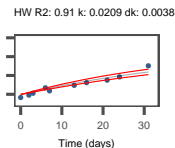

HBA – AAGHLDDLPGALSALSDLHAHK\_5

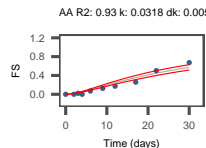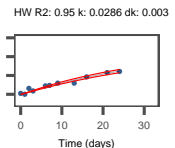



**IDHP – LVPGWTKPITGR\_3**

**KCRS – REVENVAITALEGLK\_3**

**KPYM – KGDVVIVLTGWR\_3**

AA R2: 0.95 k: 0.0308 dk: 0.00407

HW R2: 0.91 k: 0.0162 dk: 0.0025

AA R2: 0.97 k: 0.0375 dk: 0.00356

HW R2: 0.96 k: 0.0269 dk: 0.0030

AA R2: 0.94 k: 0.0383 dk: 0.00523

HW R2: 0.97 k: 0.0258 dk: 0.0021

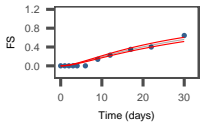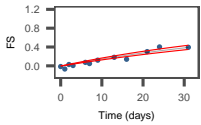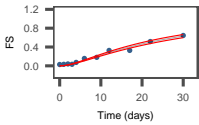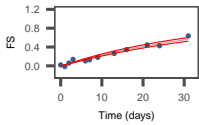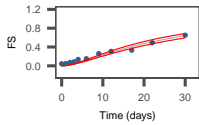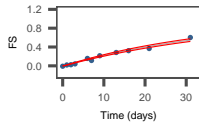

**IF5A1(Non-Unique) – VHLVGIDIFTGK\_3**

**KLH41 – IYVVGAK\_2**

**KPYM – LNFSHGTHEYHAETIK\_3**

AA R2: 0.97 k: 0.0676 dk: 0.00866

HW R2: 0.99 k: 0.0545 dk: 0.0038

AA R2: 0.94 k: 0.0734 dk: 0.0117

HW R2: 0.93 k: 0.0408 dk: 0.0085

AA R2: 0.97 k: 0.0374 dk: 0.00333

HW R2: 0.93 k: 0.0345 dk: 0.0051

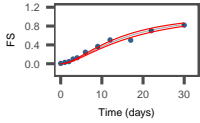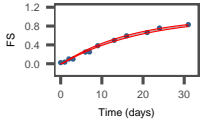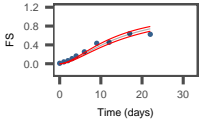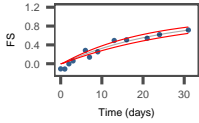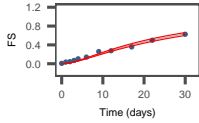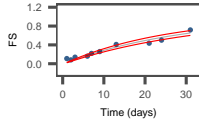

**KCRM – KDLFDPIQDR\_3**

**KLH41 – LYQSTLLQDGLK\_2**

**KPYM – PVAVALDTK\_2**

AA R2: 1 k: 0.0258 dk: 0.000745

HW R2: 0.96 k: 0.0301 dk: 0.0035

AA R2: 0.99 k: 0.0828 dk: 0.00842

HW R2: 0.94 k: 0.0564 dk: 0.012

AA R2: 0.97 k: 0.0374 dk: 0.00292

HW R2: 0.95 k: 0.022 dk: 0.00255

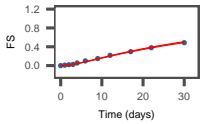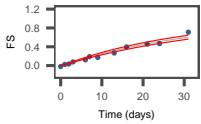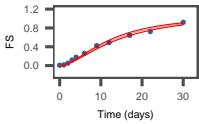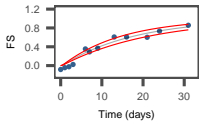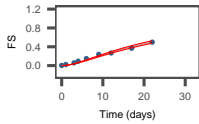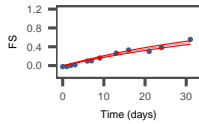

**KCRM – SMTEQEQQQLIDHFLFDK\_3**

**KPB1 – AALEALDELDFGVK\_2**

**LDB3 – CHGCDPFVEAGDK\_3**

AA R2: 0.94 k: 0.0237 dk: 0.00246

HW R2: 0.92 k: 0.0157 dk: 0.0020

AA R2: 0.97 k: 0.11 dk: 0.0214

HW R2: 0.99 k: 0.0804 dk: 0.0081

AA R2: 0.98 k: 0.0363 dk: 0.00353

HW R2: 0.95 k: 0.0276 dk: 0.0035

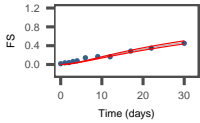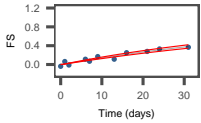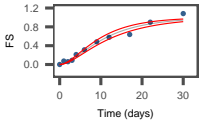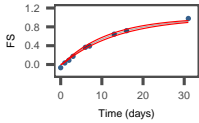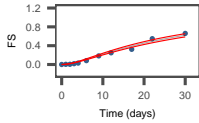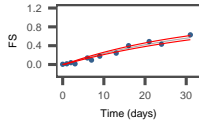

**KCRM – VGCVAGDEESYTVFK\_2**

**KPBB – FNPIDMLAAFK\_2**

**LDB3 – SASYNLSLTQK\_2**

AA R2: 0.96 k: 0.0204 dk: 0.00195

HW R2: 0.93 k: 0.0159 dk: 0.002

AA R2: 0.98 k: 0.0575 dk: 0.00575

HW R2: 0.99 k: 0.0568 dk: 0.0047

AA R2: 0.98 k: 0.0371 dk: 0.00322

HW R2: 0.99 k: 0.0249 dk: 0.0013

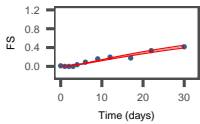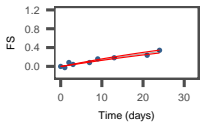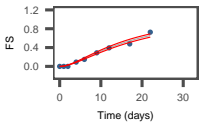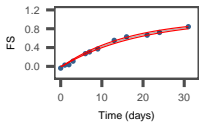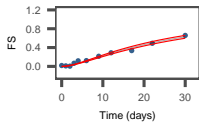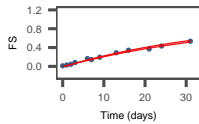

**KCRM\_HUMAN\_sp|P07310|KCRM(Non-Unique) – TDLNHENLK\_3**

**KPYM – EATESFASDPILYRPAVALDTK\_3**

**LDB3 – SWHPEEFNCAYK\_3**

AA R2: 0.99 k: 0.0253 dk: 0.00133

HW R2: 0.97 k: 0.0218 dk: 0.0018

AA R2: 0.96 k: 0.0404 dk: 0.00452

HW R2: 0.97 k: 0.0256 dk: 0.0021

AA R2: 0.97 k: 0.0409 dk: 0.00453

HW R2: 0.92 k: 0.0236 dk: 0.0037

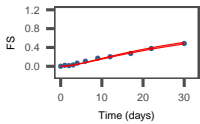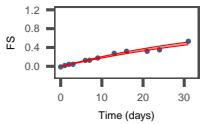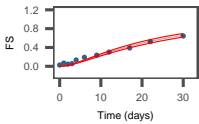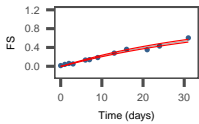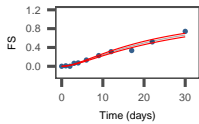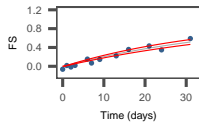

LDB3 - TQSKPEDEAWEAR\_2

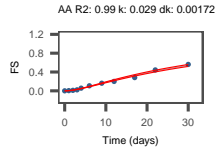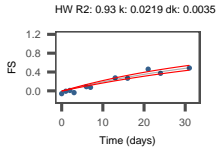

LEG1 - LNMEAINYMAADGDFK\_2

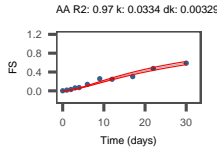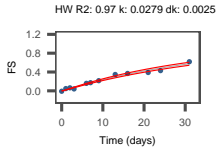

MIF - ASVPEGFLSELTQQLAQATGK\_2

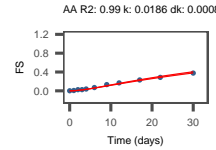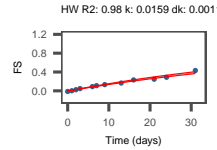

LDB3 - TQSKPEDEAWEAR\_3

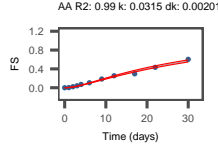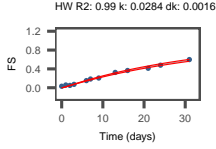

M2OM - YEGFFSLWK\_2

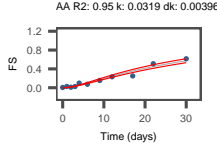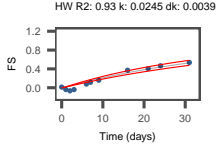

MLRS - DGIKDLDLR\_3

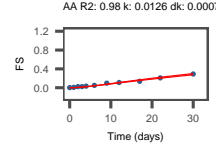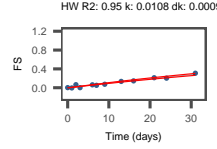

LDHA - DLADELALVDVMDK\_2

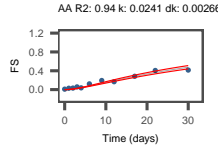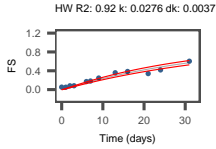

MDHM - FVFSLV DAMNGK\_2

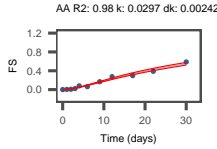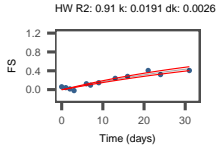

MMSA - LITLEGGK\_2

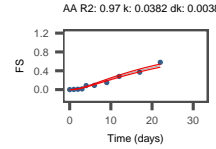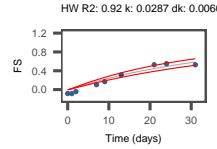

LDHA - GEMMDLQHGSLFLK\_3

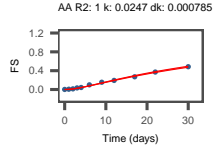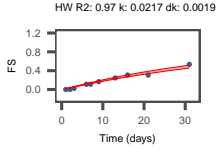

MDHM - IQEAGTEVVK\_2

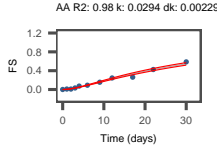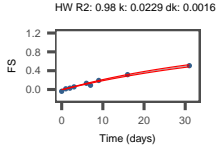

MYG - GQHAAEIQLAQSHATK\_3

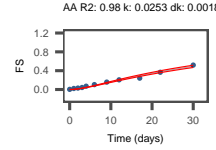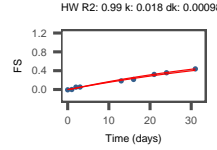

LDHA - LLIVSNPDLTYVAWK\_2

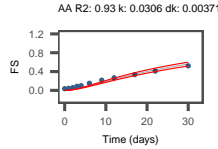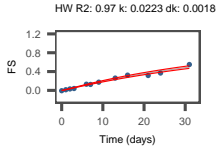

MDHM - VAVLGASGGIQLPSLLK\_2

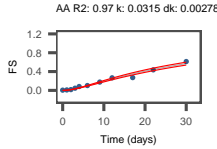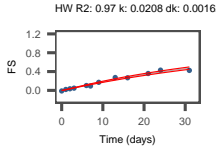

MYG - GQHAAEIQLAQSHATK\_4

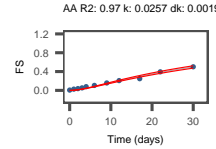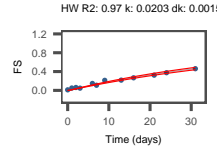

LDHA - QVVD SAYEVIK\_2

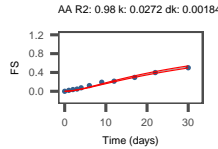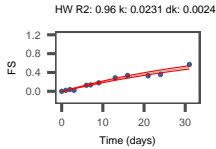

MDHM - VNVPIVGHGAGK\_3

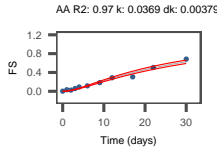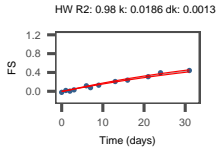

MYG - HSGDFGADAQGAMSK\_2

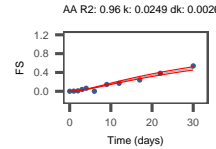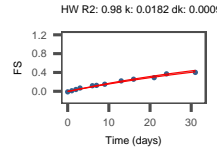



MYG\_HUMAN\_sp|P04247|MYG(Non-Unique) – GLSDGEWQLVLNVWGK\_2

MYH3(Non-Unique) – DPLNETVGLYQK\_3

MYH3(Non-Unique) – LTGAVMHYGNMK\_2

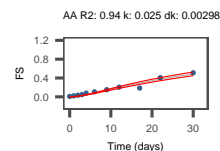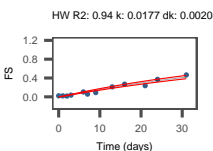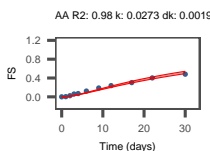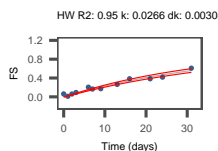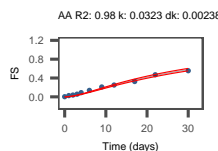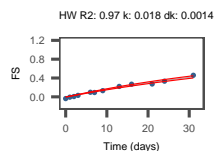

MYH1 – DDQVPMNPPK\_2

MYH3(Non-Unique) – EEQAEPDGTAVDK\_2

MYH3(Non-Unique) – QAFTQQIEELK\_2

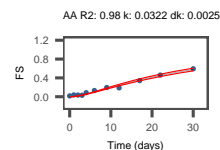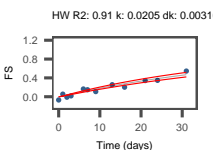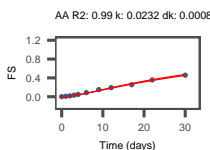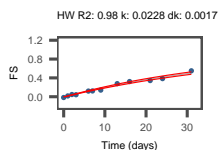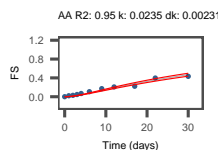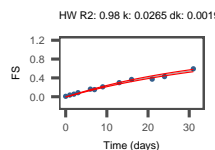

MYH1 – NLTEEMAGLDETIK\_3

MYH3(Non-Unique) – ENQSILITGESGAGK\_3

MYH3(Non-Unique) – QAFTQQIEELKR\_2

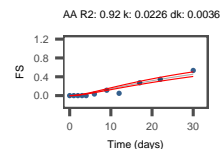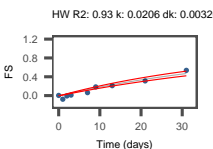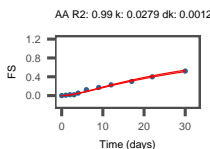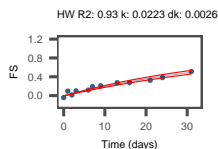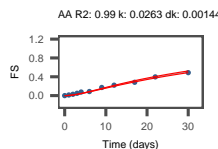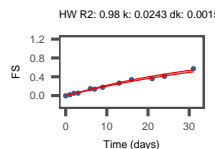

MYH1 – SELQAALAEAEASLEHEGK\_3

MYH3(Non-Unique) – GIFSILEECMFPK\_2

MYH3(Non-Unique) – QREEQAEPDGTAVDK\_2

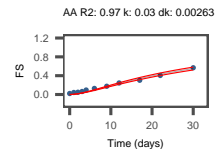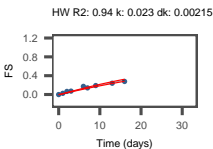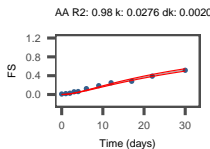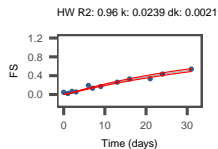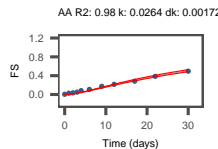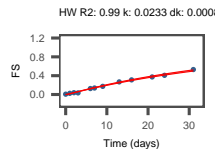

MYH1 – YEETHAELEASQK\_3

MYH3(Non-Unique) – LEDECSELK\_2

MYH3(Non-Unique) – QREEQAEPDGTAVDK\_3

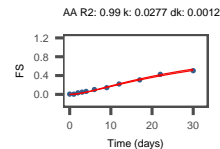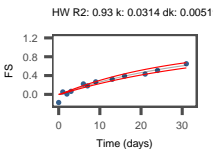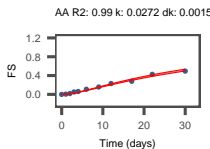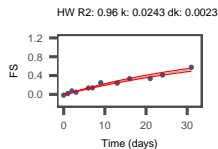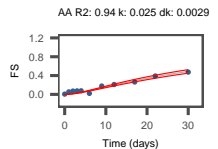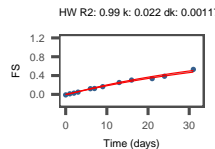

MYH3(Non-Unique) – ASAIEPQGFDSK\_2

MYH3(Non-Unique) – LQQFNHHMFVLEQEYK\_2

MYH4 – AGTVDIYNIIGWLDK\_2

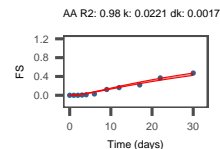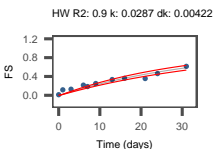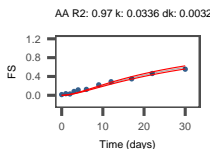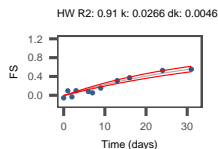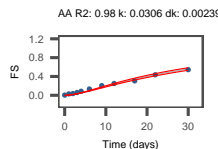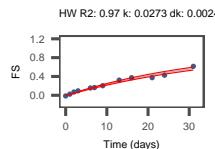

MYH4(Non-Unique) – EFEMSNLQSK\_2

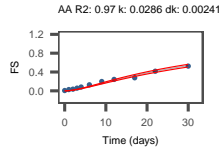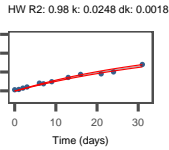

MYH4(Non-Unique) – LYEQHLGK\_2

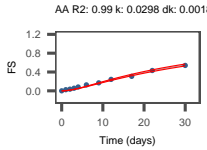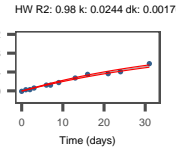

MYH4 – TEGGATVTVK\_2

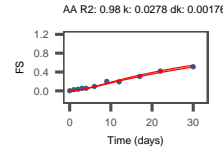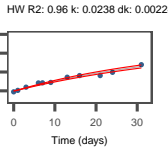

MYH4 – ELENEVEEQK\_2

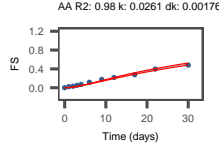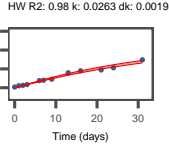

MYH4(Non-Unique) – MTHLHEPAVLYNLK\_3

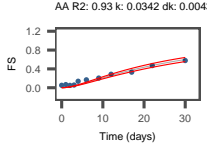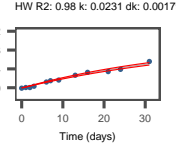

MYH4(Non-Unique) – THLHEPAVLYNLK\_3

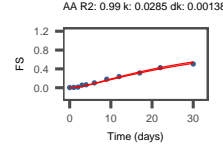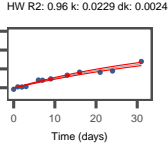

MYH4 – ELENEVEEQKR\_2

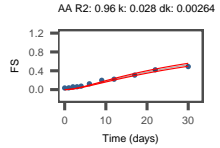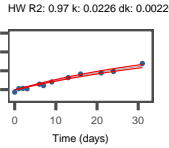

MYH4(Non-Unique) – MTHLHEPAVLYNLK\_4

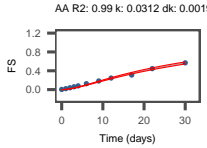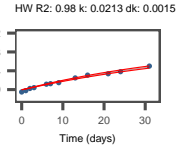

MYH4 – YEETQAELEASQK\_3

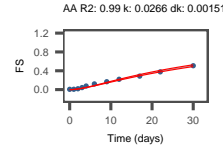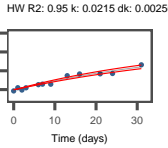

MYH4(Non-Unique) – KLETDISIQGEMEDIVQEAR\_2

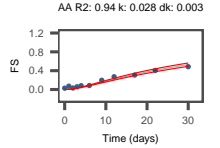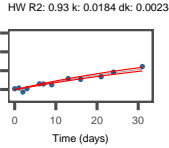

MYH4 – NAYEESLDQLETLK\_3

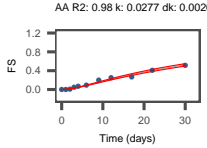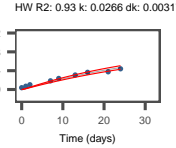

MYH4(Non-Unique) – YEQHLGK\_2

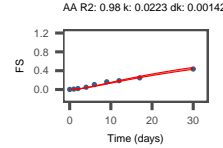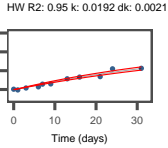

MYH4 – LFSGGQAAEAEGGGK\_2

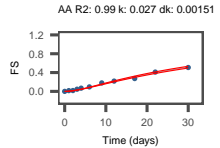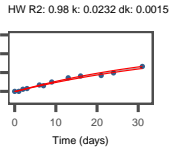

MYH4 – QLDEKAMVQLSR\_3

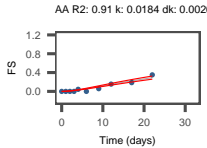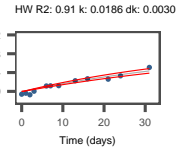

MYH6(Non-Unique) – LHPEAVLYNLK\_2

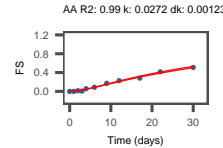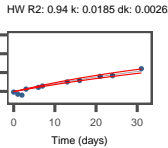

MYH4 – LINELSTQK\_2

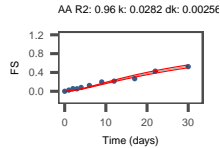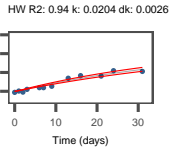

MYH4 – SLVHYAGTVDYNIGWLDK\_3

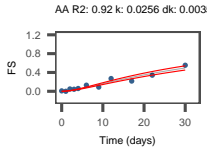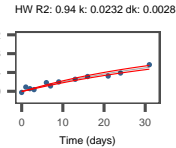

MYH6(Non-Unique) – LHPEAVLYNLK\_3

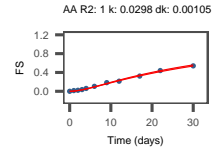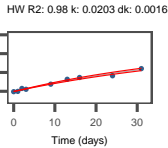

MYH7B(Non-Unique) – AITDAAMMAEELK\_2

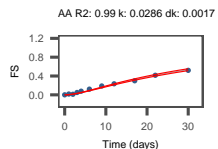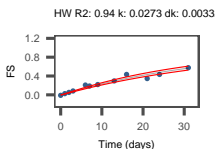

MYH8(Non-Unique) – ELEGEVENEQKR\_2

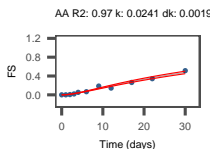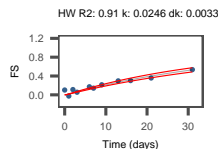

MYH8 – TSVFVAEPK\_2

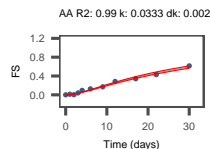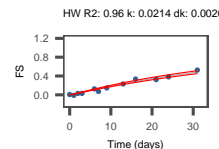

MYH7B(Non-Unique) – AITDAAMMAEELK\_3

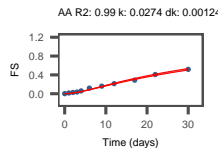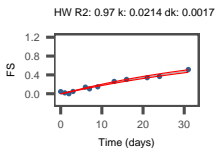

MYH8(Non-Unique) – IQLELNQVK\_2

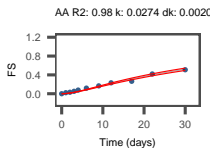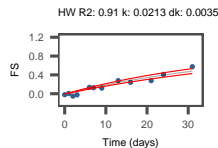

MYH8(Non-Unique) – YDKIEDMAM\_2

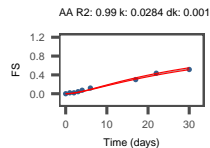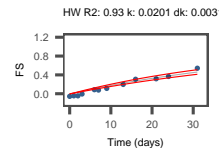

MYH7B(Non-Unique) – KEQD TSAHLER\_3

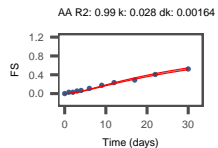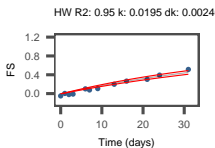

MYH8(Non-Unique) – KIAEQELLDASER\_2

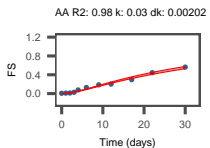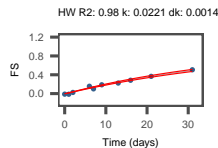

MYL1(Non-Unique) – IDLSAIK\_2

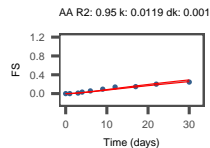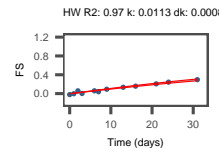

MYH7B(Non-Unique) – MFVLEQEEYK\_2

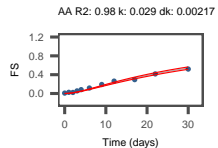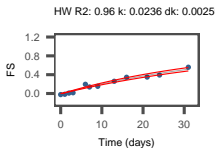

MYH8(Non-Unique) – KLQHELEEAER\_2

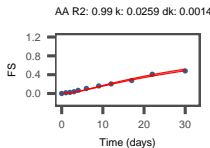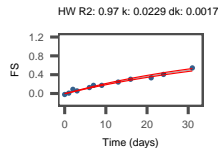

MYL1 – KIEFEQFLPMMQ\_2

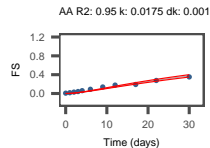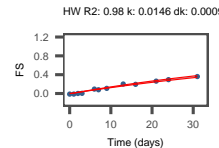

MYH7B(Non-Unique) – SILEEECMFPK\_2

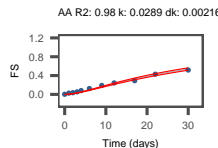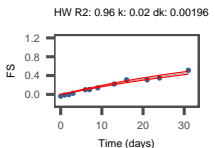

MYH8(Non-Unique) – KLQHELEEAER\_3

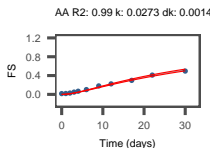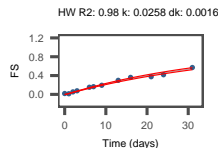

MYL1 – KIEFEQFLPMQAISN\_2

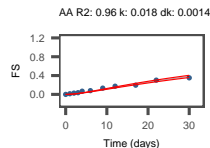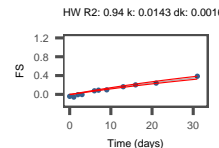

MYH8(Non-Unique) – DEEIDQLKR\_3

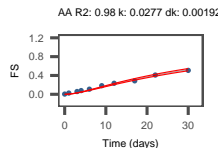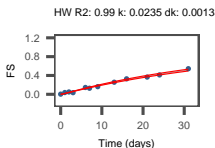

MYH8(Non-Unique) – LLSGIDHTQYK\_2

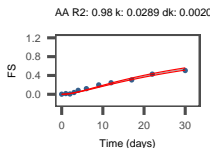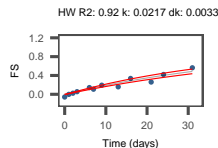

MYOM1 – DAGFYEVILK\_2

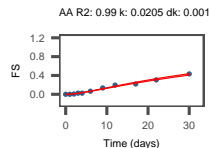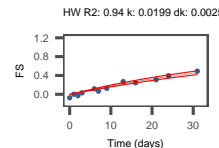

MYOM1 – EAAAYIAQK\_2

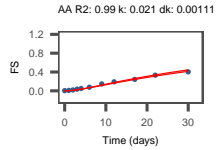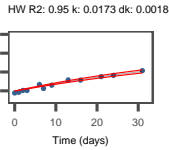

MYOM1 – VVITPEIK\_2

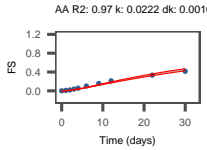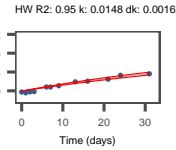

MYOZ1 – FLPTVGGQLETAGGFSYSGK\_2

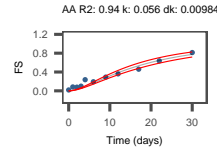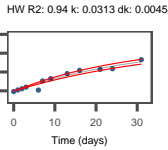

MYOM1 – LVDEAFQDLMTVECK\_3

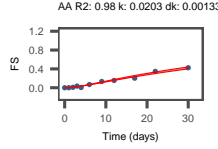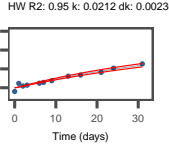

MYOM1 – YGMHTLEISK\_3

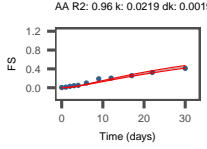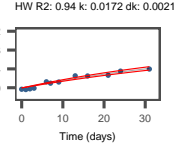

MYOZ1 – PLSGTPAPNK\_2

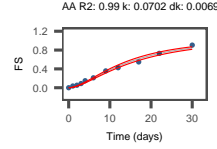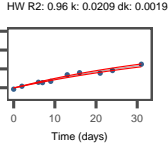

MYOM1 – LYSFVCYYLDDLK\_2

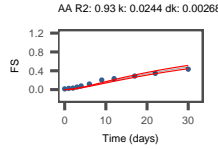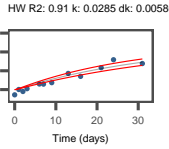

MYOTI – LECQISAIPPK\_2

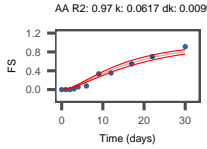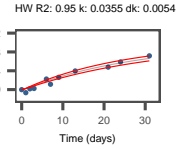

MYOZ1 – PLSGTPAPNKR\_3

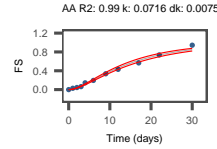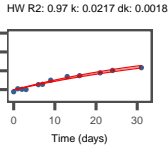

MYOM1 – NQVPINVHANPGK\_3

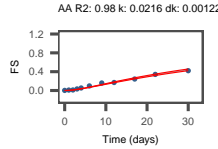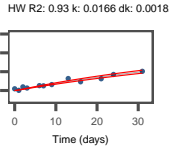

MYOTI – LQPPGPEVSGFSPQTK\_2

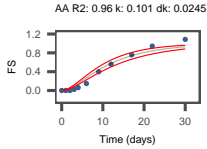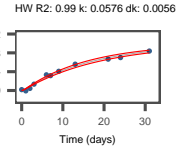

MYOZ1 – TAMPYGGYEK\_2

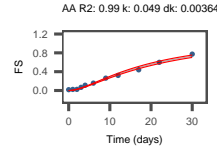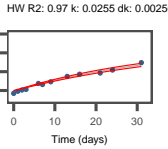

MYOM1 – NSLVLQWKPPVYSGR\_3

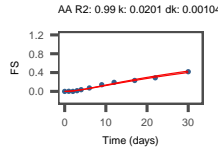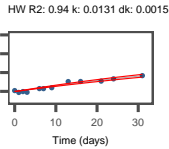

MYOTI – PIQTLPAK\_2

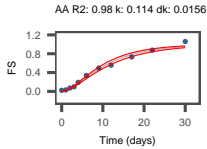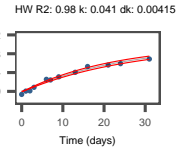

MYOZ1 – VELGIDLAYGAK\_2

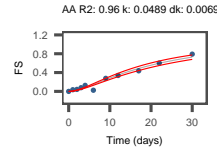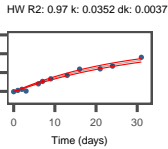

MYOM1 – TTMSHYQEK\_3

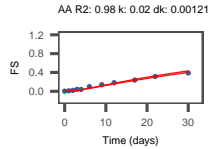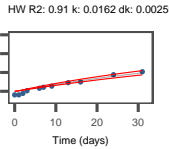

MYOZ1 – FIYENHPDVFSSMDHFQK\_4

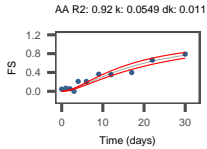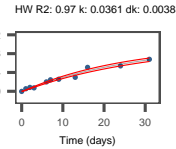

MYPC2 – AFNELGEALAECK\_2

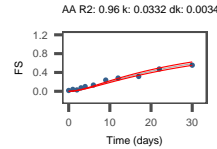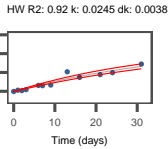

**MYPC2 – AFNELGEALAECK\_3**

**MYPC2 – QLEVLQDIADLTVK\_2**

**NDKB – DRPFFGLVK\_3**

AA R2: 0.98 k: 0.0281 dk: 0.00215

HW R2: 0.91 k: 0.0204 dk: 0.0038

AA R2: 0.97 k: 0.0289 dk: 0.00226

HW R2: 0.91 k: 0.0306 dk: 0.0055

AA R2: 0.99 k: 0.0328 dk: 0.00133

HW R2: 0.93 k: 0.0164 dk: 0.0021

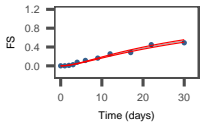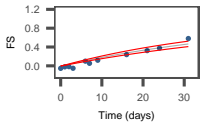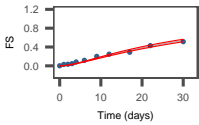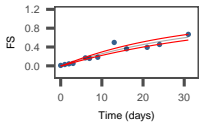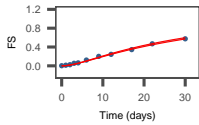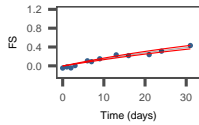

**MYPC2 – AGPAENVVK\_2**

**MYPC2 – VFVNAIGVSQPSMNTK\_2**

**NDRG2 – GWMDWAHK\_3**

AA R2: 0.97 k: 0.0313 dk: 0.00285

HW R2: 0.94 k: 0.0194 dk: 0.0024

AA R2: 0.97 k: 0.0294 dk: 0.00266

HW R2: 0.91 k: 0.0214 dk: 0.0034

AA R2: 0.96 k: 0.284 dk: 0.0778

HW R2: 0.91 k: 0.085 dk: 0.0265

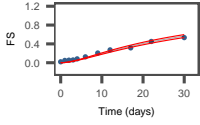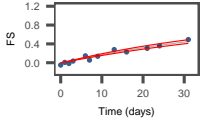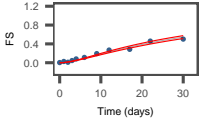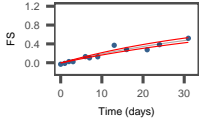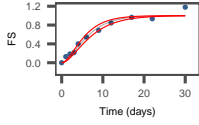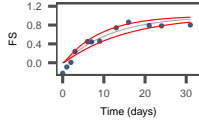

**MYPC2 – DDDLGPPEIWELK\_2**

**MYPC2 – VGEALNLVIFPGK\_2**

**NDRG2 – MADSGGQPQTGPK\_2**

AA R2: 0.97 k: 0.0282 dk: 0.00244

HW R2: 0.95 k: 0.0256 dk: 0.0032

AA R2: 0.99 k: 0.0295 dk: 0.00174

HW R2: 0.92 k: 0.0253 dk: 0.0040

AA R2: 0.98 k: 0.203 dk: 0.0351

HW R2: 0.99 k: 0.155 dk: 0.0151

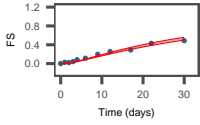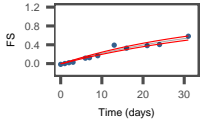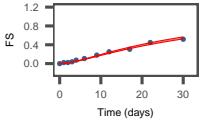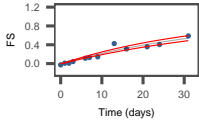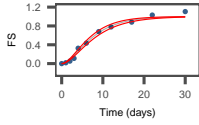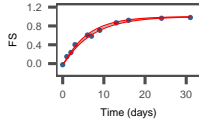

**MYPC2 – ESHDSTSNVYTVELHIGK\_3**

**NACAM – AIETLLVSPAK\_2**

**NDRG2 – YALNHPDTEGLVLINDPNAK\_3**

AA R2: 0.95 k: 0.0309 dk: 0.00344

HW R2: 0.96 k: 0.0264 dk: 0.0027

AA R2: 0.94 k: 0.24 dk: 0.0932

HW R2: 0.96 k: 0.0908 dk: 0.0176

AA R2: 0.99 k: 0.278 dk: 0.046

HW R2: 0.93 k: 0.141 dk: 0.0316

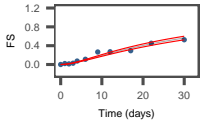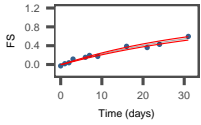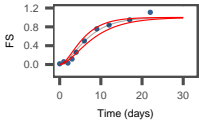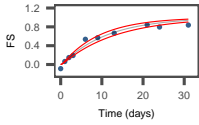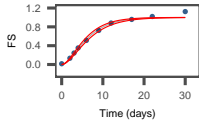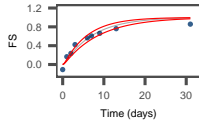

**MYPC2 – IFSENICGLSDSPGVSK\_2**

**NACAM – ENLAAPAVLPVSSK\_2**

**NDUA7 – AAESSAMAATEK\_2**

AA R2: 0.95 k: 0.029 dk: 0.00331

HW R2: 0.9 k: 0.022 dk: 0.0037

AA R2: 0.94 k: 0.276 dk: 0.107

HW R2: 0.97 k: 0.106 dk: 0.0169

AA R2: 0.97 k: 0.0644 dk: 0.0104

HW R2: 0.92 k: 0.0382 dk: 0.0067

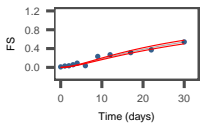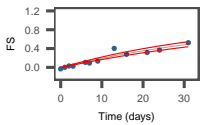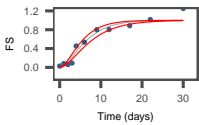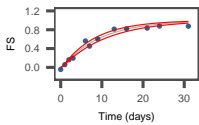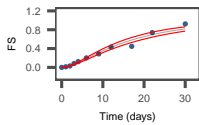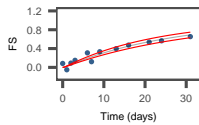

**MYPC2 – PQVWTK\_2**

**NDKA(Non-Unique) – GLGVEIHK\_2**

**NDUA9 – LFLGSPFEPWTK\_2**

AA R2: 0.98 k: 0.0322 dk: 0.00243

HW R2: 0.95 k: 0.0162 dk: 0.0020

AA R2: 0.98 k: 0.0312 dk: 0.0021

HW R2: 0.91 k: 0.0192 dk: 0.0032

AA R2: 0.95 k: 0.042 dk: 0.00656

HW R2: 0.96 k: 0.031 dk: 0.00315

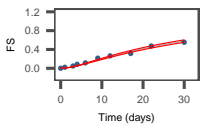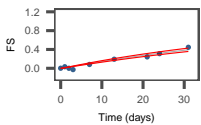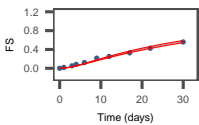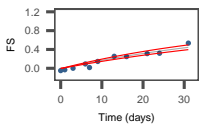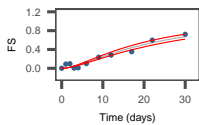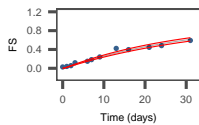

**NDUAA – YGLLAALIGDK\_2**

**NDUS1 – LVNQVELADPLVPPQLTIK\_2**

**NDUS4 – LDITTLGVPEEHIK\_3**

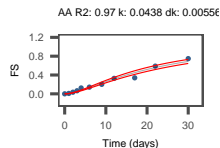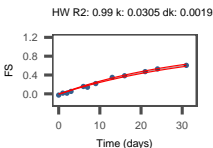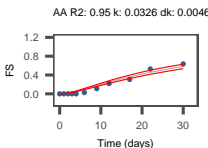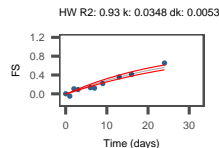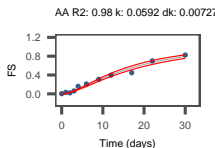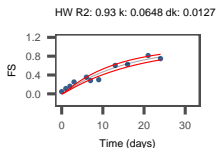

**NDUAD – IALMPLFQAEK\_2**

**NDUS1 – LVNQVELADPLVPPQLTIK\_3**

**NDUS8 – EPATINYPFEK\_2**

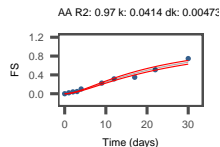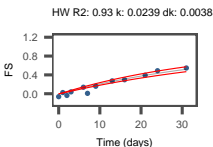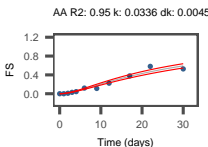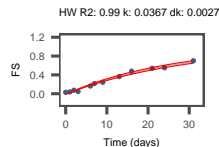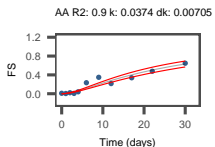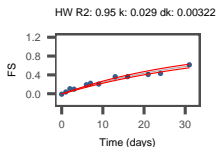

**NDUB9 – AMYPDYFSK\_2**

**NDUS1 – MFMSELSGNVIDICPGALTSK\_2**

**NDUV1 – GAGAYICGEETALIESIEGK\_2**

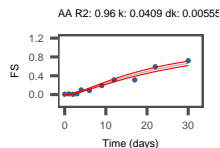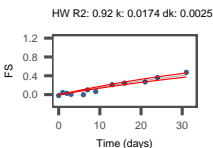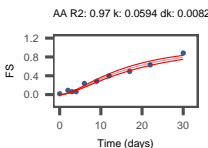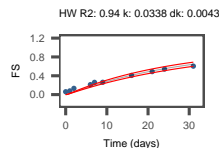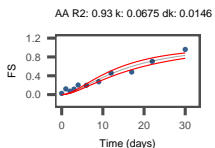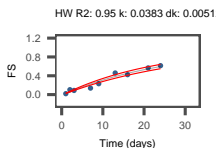

**NDUBA – TPASPQTSLNPITYLTK\_2**

**NDUS2 – APGFAHLAGLDK\_3**

**NDUV1 – GGAGFPTGLK\_2**

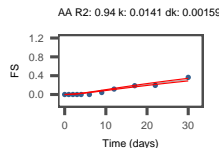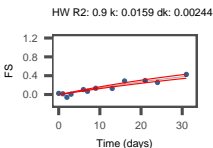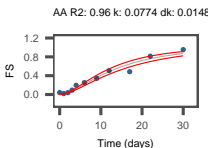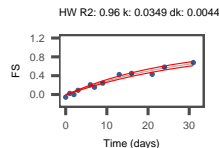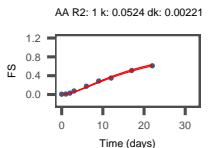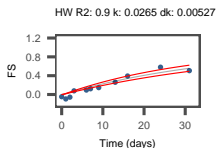

**NDUS1 – IASQVAALDLGYKPGVEAIR\_3**

**NDUS2 – TSMESLIHFK\_3**

**NDUV1 – GPDWILGEMK\_2**

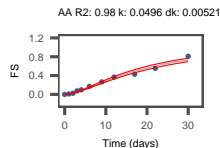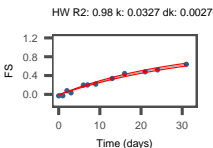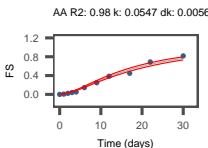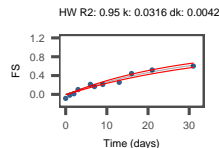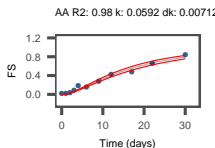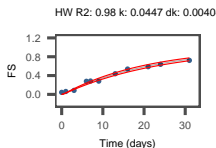

**NDUS1 – KPMVVLGSSALQR\_3**

**NDUS3 – KFDLNSPWEAFPAYR\_3**

**NDUV1 – HAGGVGTGWDNLLAVIPGSSSTPLIPK\_3**

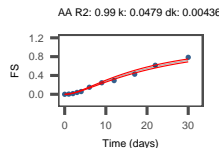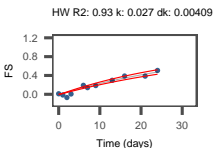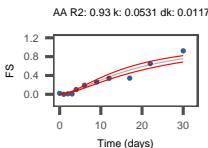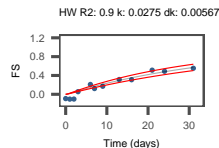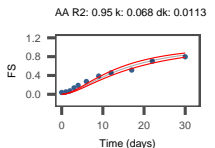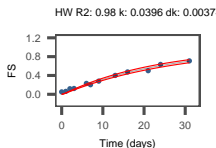

**OBSCN – ADAGEYSCAEGGQK\_2**

**ODPB – VFLGEEVAQYDGAYK\_2**

**PFKAM – LNIIVAEAGAIK\_2**

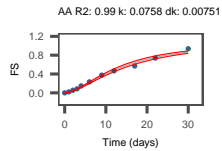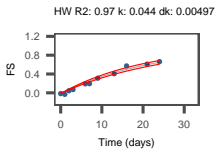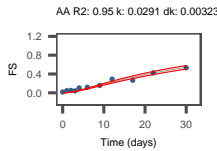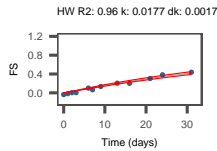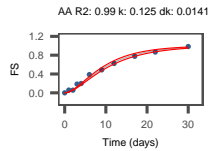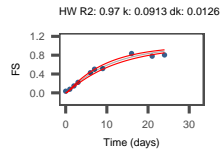

**OBSCN – IAPADYGPVHWFLDK\_3**

**ODPB – VLEDNSVPQVK\_2**

**PFKAM – RFDEAIK\_2**

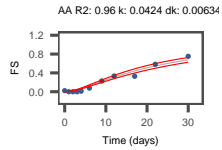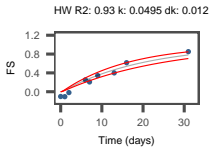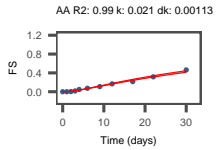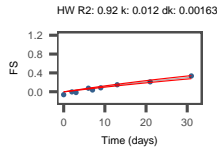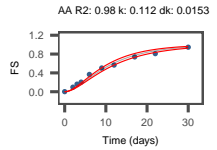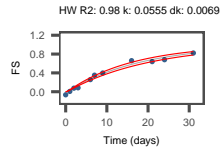

**ODO1 – FGLEGCEVLIPALK\_2**

**PDLI5 – DFNMLPTISSLK\_2**

**PFKAM – VLVVHDGFEGLAk\_2**

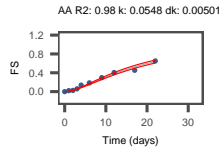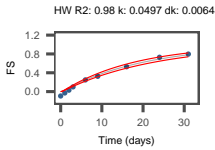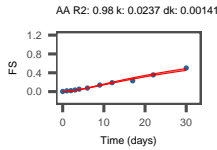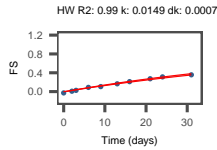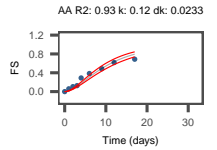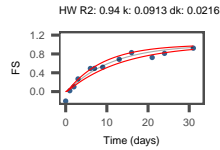

**ODO1 – IEQLSPFPFDLLLK\_2**

**PFKAM – ALVFQPYTELK\_2**

**PFKAM – VLVVHDGFEGLAk\_3**

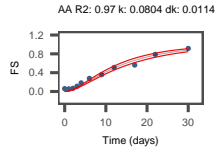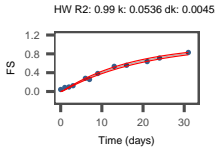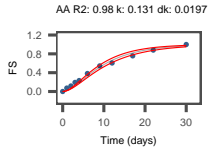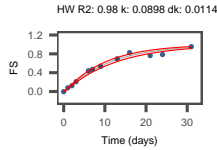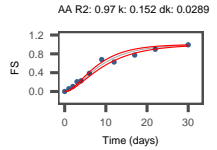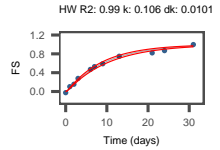

**ODO1 – VIPENGAQDPHK\_3**

**PFKAM – DLQVNVEHLVQK\_3**

**PGAM2 – SFDTPPPPMDEK\_2**

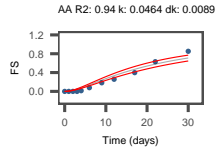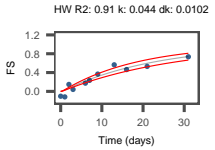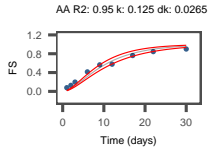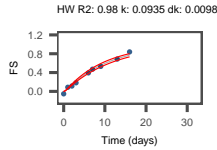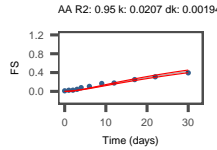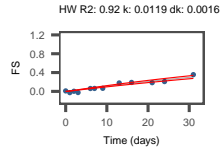

**ODP2 – GLETIADVVLASK\_2**

**PFKAM – GQIEEAGWSYVGGWTGQGGSK\_2**

**PGK1 – ALESPPERFLAILGGAk\_3**

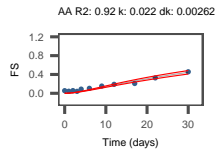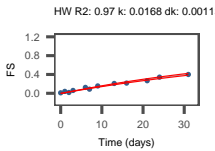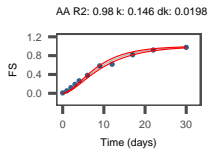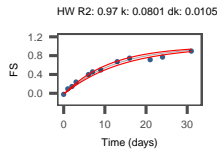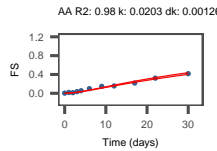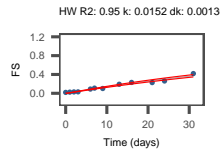

PGK1 – IQLINMLDK\_2

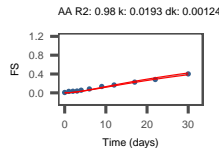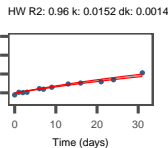

PGS2 – DLHTLILVNNK\_3

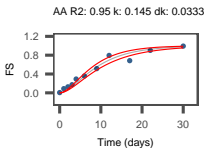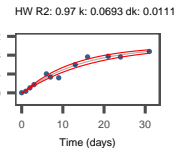

PRDX6 – DLAILLGMGLDPVEK\_2

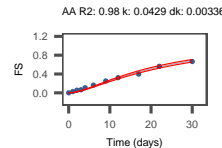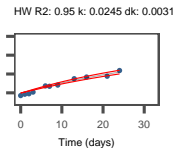

PGM1 – ADNFEYSDPVDGSISK\_2

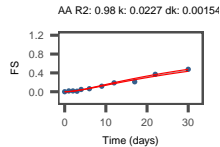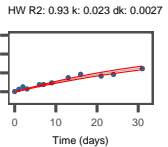

PLEC – LLLLEAQAATGFLDDPVK\_2

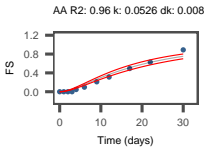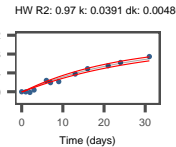

PROF1 – TFVTSITPAEYGVLVGK\_2

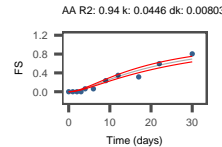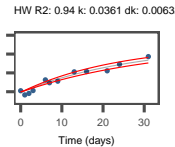

PGM1 – INQDPQVMLAPLISIALK\_2

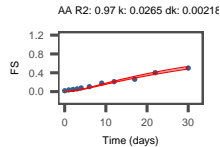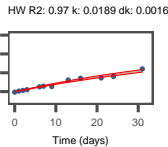

PP1A(Non-Unique) – AHQVVEDGYEFFAK\_3

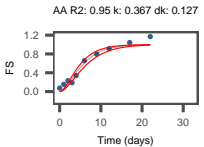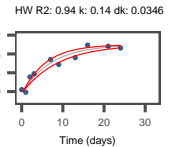

PSA5 – LQFQEYAEIAIK\_2

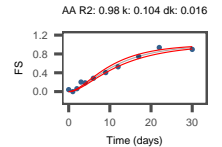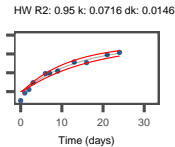

PGM1 – INQDPQVMLAPLISIALK\_3

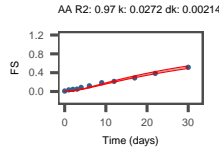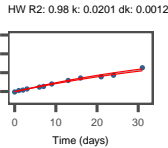

PRDX2 – SLSQNYGVLK\_2

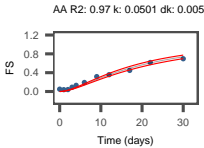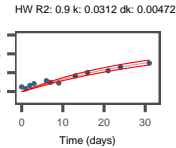

PURA1 – DGVYFMYEALHGPPK\_3

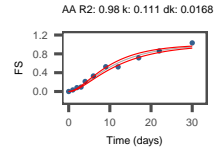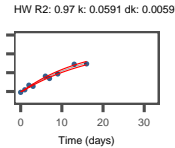

PGM1 – YDYEEVEAEGANK\_2

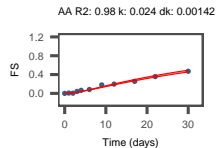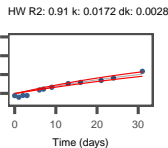

PRDX3 – GLFIIDPNVVK\_2

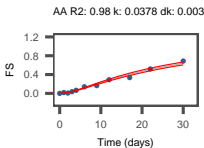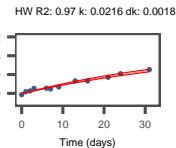

PYGB(Non-Unique) – YEFGIFNQK\_2

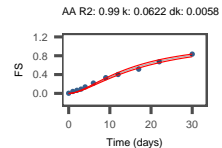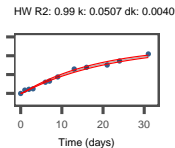

PGM5(Non-Unique) – NIFDFNAIK\_2

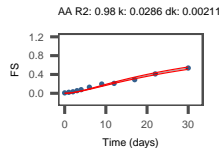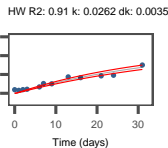

PRDX4(Non-Unique) – GLFIIDDK\_2

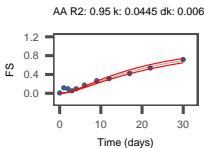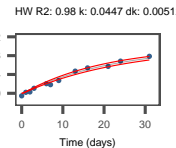

PYGB(Non-Unique) – YGNPWEK\_2

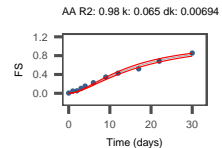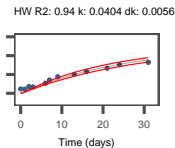



PYGM – AWDVTVK\_2

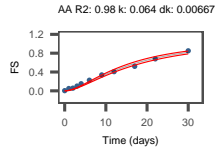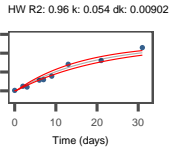

PYGM – SLFDVQVK\_2

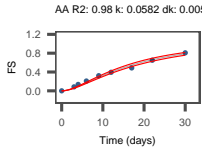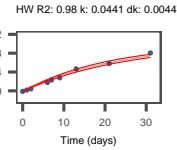

QCR2 – AVAQGNLSSADVQAAK\_2

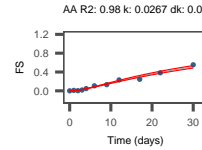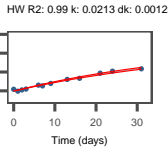

PYGM – DFYELEPHK\_3

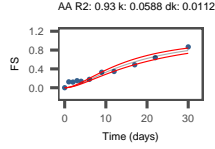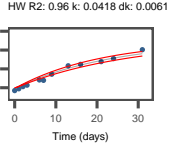

PYGM – TNFDAPDK\_2

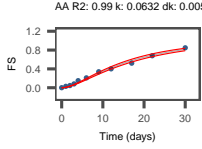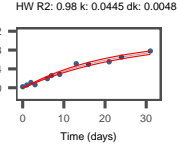

QCR2 – TSAAPGGVLPQDLEFTK\_2

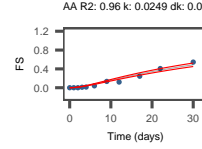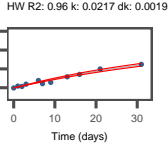

PYGM – IGEDYSIDLQLRK\_3

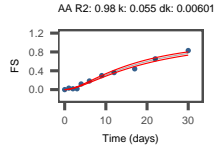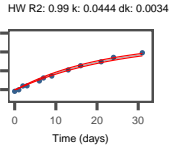

PYGM – VIPAADLSEIQSTAGTEASGTGNMK\_2

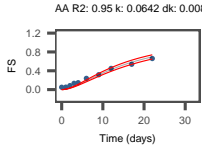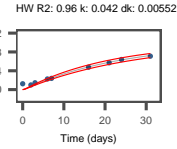

RS10 – IAIYELLFK\_2

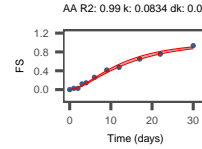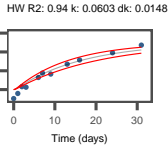

PYGM – IHSEILK\_2

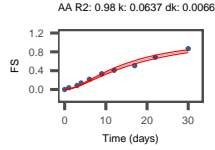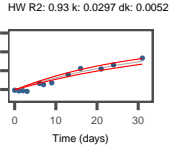

PYGM – VIPAADLSEIQSTAGTEASGTGNMK\_3

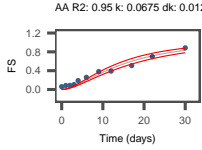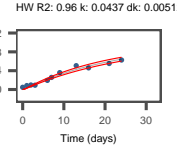

RS2 – SLEEIYFLSLPIK\_2

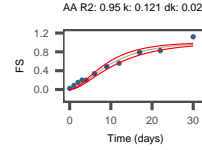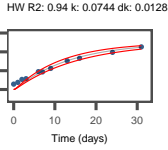

PYGM – MSLVEEGAVK\_2

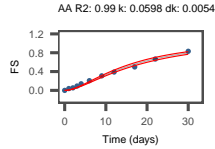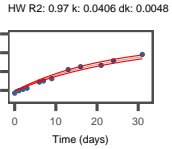

QCR1 – VVELLADIVQNSLSDSQIEK\_2

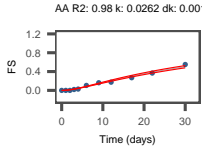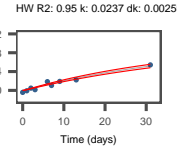

RS25 – AALQELLSK\_2

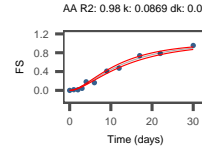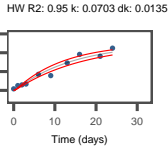

PYGM – QIEQLSSGFFSPK\_3

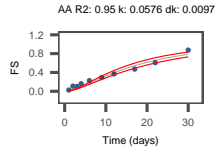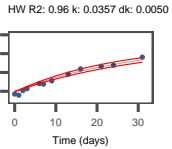

QCR1 – VVELLADIVQNSLSDSQIEK\_3

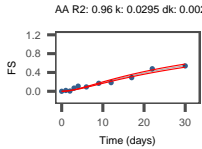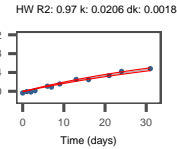

RS7 – AIHFVVPQLK\_2

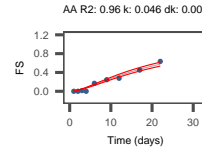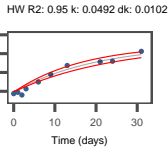

**RTN2 – IPGTGLAPTASVSGSK\_2**

**RYR3(Non-Unique) – DPVGSVEFQFVPLK\_2**

**SODM – GDVTTQVALQPALK\_2**

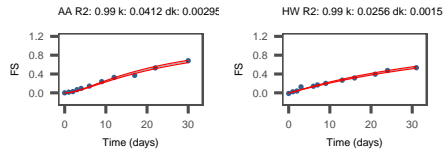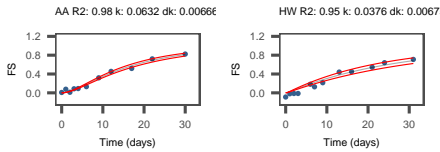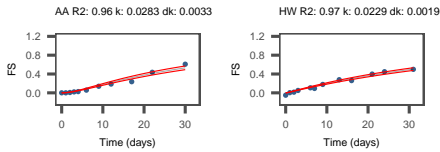

**RTN2 – QHQAQIQVYGLVTNQLSHIK\_4**

**SDHB – DLVPDLSNFYAQYK\_2**

**SODM – HHAAYVNNLNATEEK\_3**

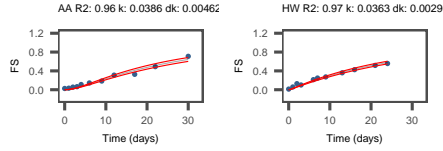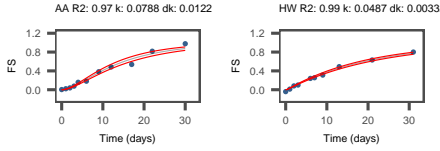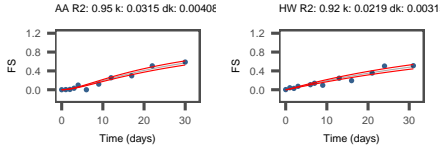

**RYR1 – LFPVFLPTHQNVVQFELGK\_3**

**SDHB – MQTYEVDLNK\_2**

**SRCA – AITQELPSLLGSLGK\_2**

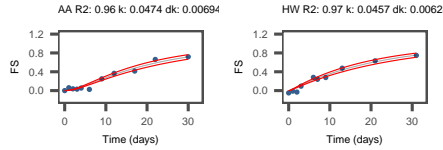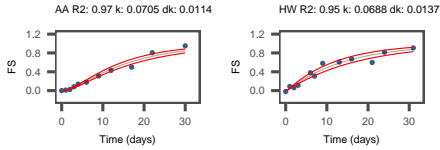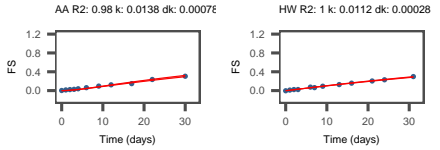

**RYR1 – LLWGSFLFGGLVDSAK\_2**

**SH3BG – EENIYSFLGLAPPGSK\_2**

**SRCA – AITQELPSLLGSLGK\_3**

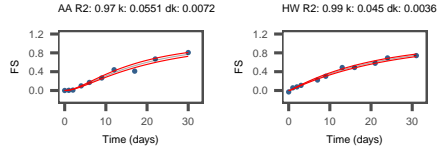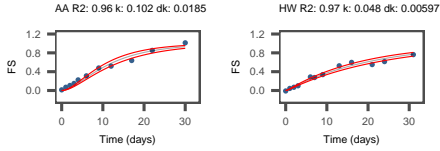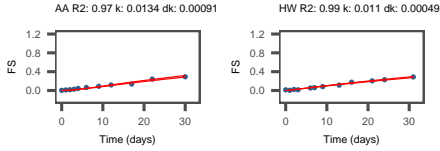

**RYR1(Non-Unique) – LMSLLEK\_2**

**SH3BG – EENIYSFLGLAPPGSK\_3**

**SRCA – MTFFSGDGLVFK\_2**

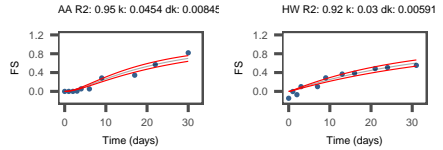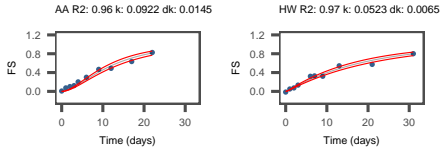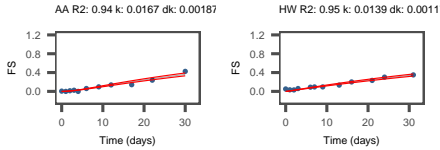

**RYR1 – LVLNTPSPFSNYWDK\_2**

**SODC – GDGPVQGTIHFEQK\_3**

**SUCB1 – LHGGTPANFLDVGAGATVQVQTEAFK\_3**

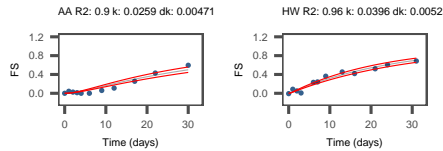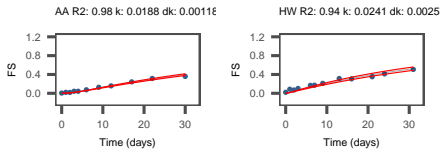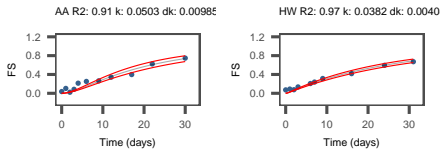

SUCB1 - SSDEAYIAK\_2

TERA - LGDVISIQPCPDVK\_2

TITIN - AADPIDPPGPPAK\_2

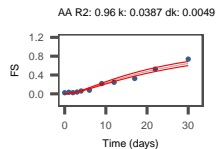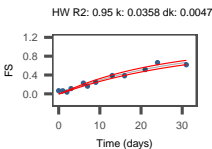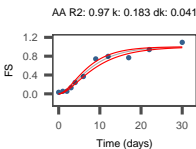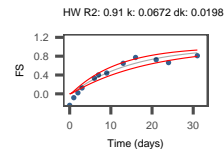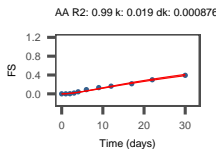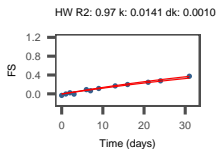

SYNP2 - APPPVAYNPIHSPSYPLAAIK\_3

TERA - NAPAIFIDELDAIAPK\_2

TITIN - ADSCEFTVTGLQK\_2

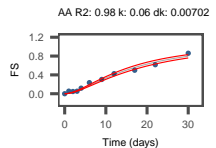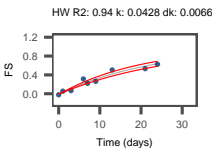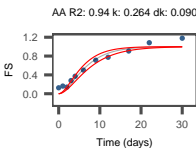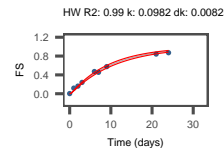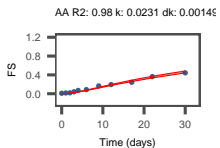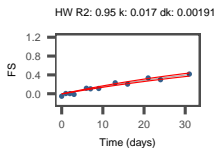

TBA1B(Non-Unique) - SIQFVDWCPTGFK\_2

THIL - LGTAAIQGAIEK\_2

TITIN - AEAWEFK\_2

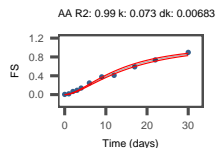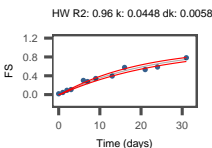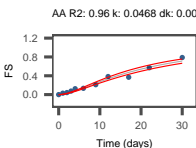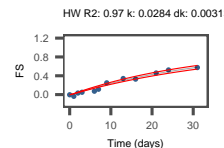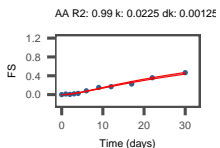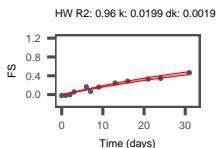

TBA1B(Non-Unique) - VGINYQPPTVPGDLAK\_2

THIL - QATLGAGLPSTPCTTVNK\_2

TITIN - AGDSIVLSAISILGK\_2

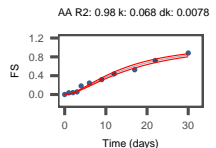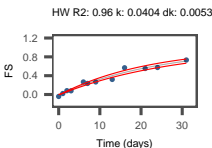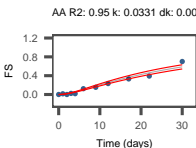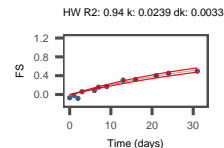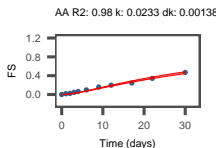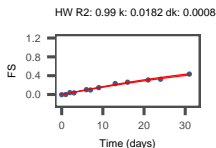

TCTP - DLISHDELFSDIYK\_3

THIL - TPIGSFLGSLASQATK\_3

TITIN - AGDSIVLSAISILGK\_3

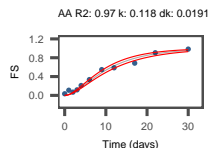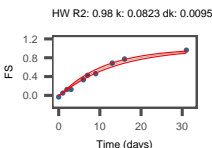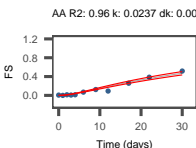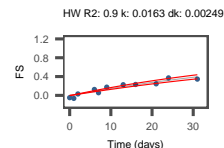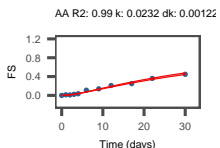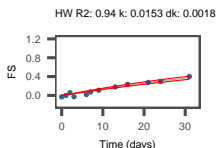

TERA - IVSQLLTMLDGLK\_2

THIM - LEDTLWAGLDQHVK\_3

TITIN - AGSPPSPKTEYVTAR\_3

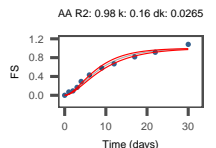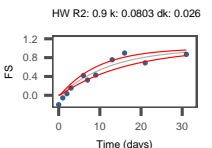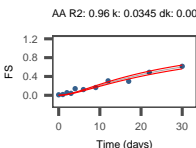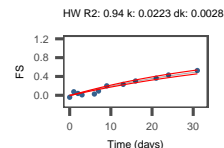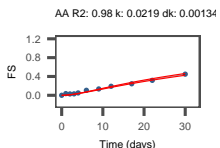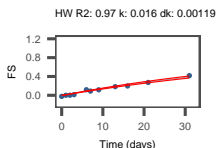

TITIN – AGVGEHADVPGPVMVEEK\_3

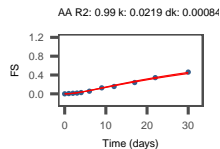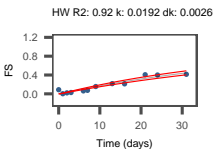

TITIN – ANIAGATDVK\_2

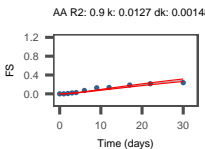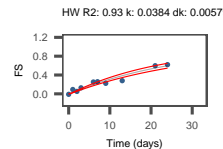

TITIN – ATSYTITSLIENQEK\_2

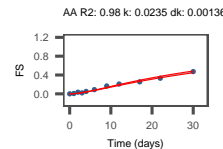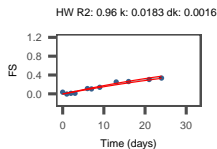

TITIN – ALDPFTTSPPTSLEITSVK\_2

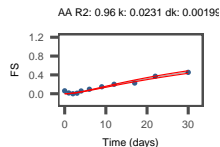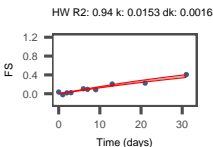

TITIN – AQIDVTPVGSK\_2

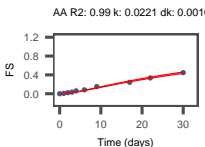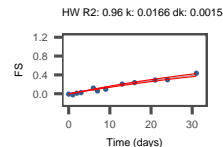

TITIN – AVNVAGVGEPGEVTDVIEMK\_2

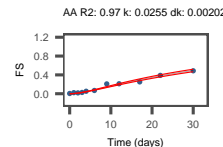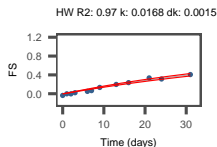

TITIN – ALDPLHPPGPK\_3

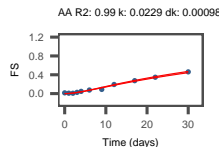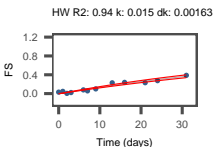

TITIN – ASINVLDLIIPPSFK\_2

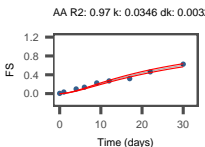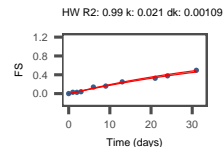

TITIN – DAHRGWLPVSESVTRPTFK\_4

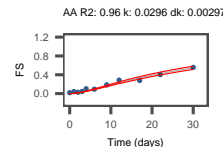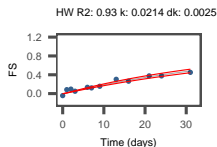

TITIN – ALPQEAIIETASSSMVIK\_2

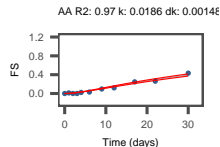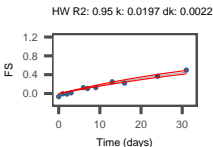

TITIN – ATGNPNPDIVWLK\_2

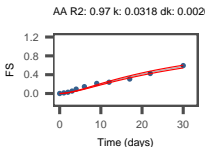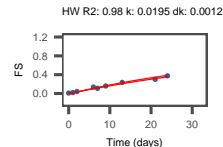

TITIN – DDENLQMSFVDNVATLK\_2

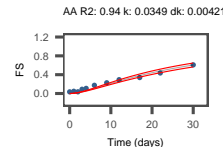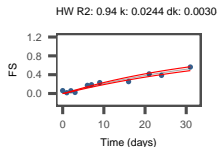

TITIN – ALVPGNIFK\_2

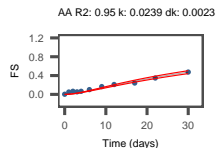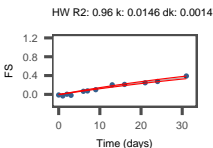

TITIN – ATNDVGS DTCVSGVTMK\_2

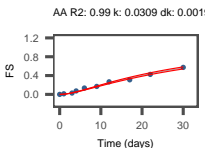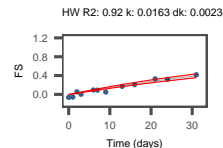

TITIN – DDGGTEITNIVEK\_2

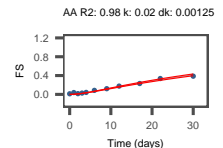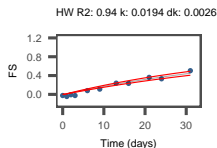

TITIN – AMFECEVSEPDITVQWMK\_2

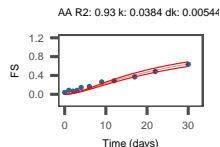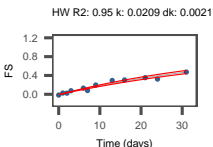

TITIN – ATNEVGS DTCACTVK\_2

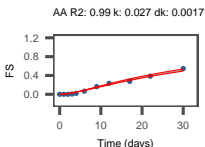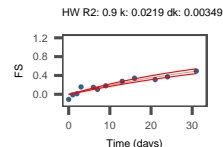

TITIN – DEKEFEELVAFIQR\_3

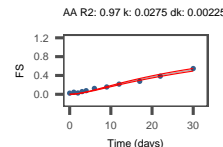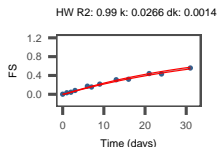

**TITIN - DENVPTTVEFGPEYFDGLVIK\_2**

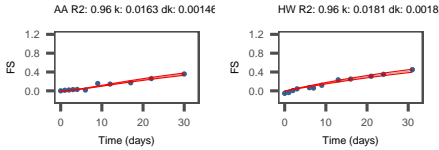

**TITIN - DSVHLTWEPPDDGGSPLTGYVVEK\_3**

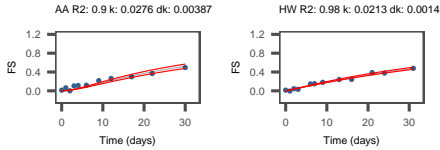

**TITIN - EQLLSTGFK\_2**

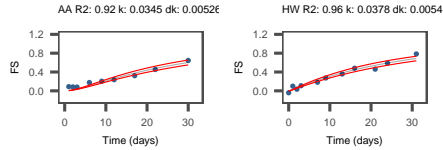

**TITIN - DENVPTTVEFGPEYFDGLVIK\_3**

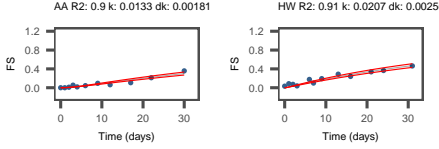

**TITIN - DSVLLWPEPIIDGGAK\_2**

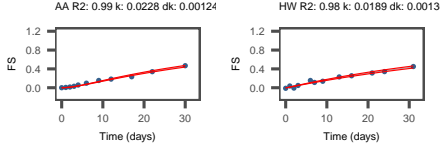

**TITIN - EIELDFAVPLK\_2**

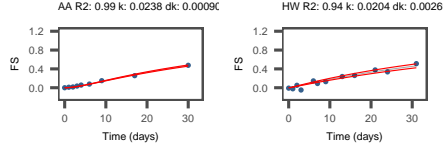

**TITIN - DGLEVIVPNPIK\_2**

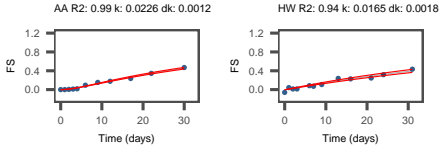

**TITIN - DSVNLTWTEPASDGGSK\_2**

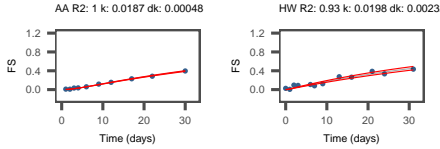

**TITIN - ELAESVIAK\_2**

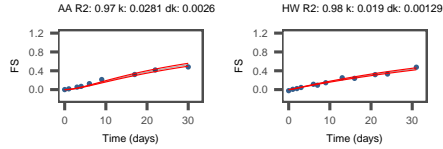

**TITIN - DIRPSDIAQITSTPTSSMLTVK\_3**

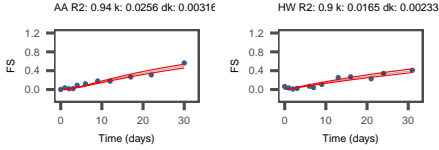

**TITIN - DSVLSWLKPEHDGGR\_4**

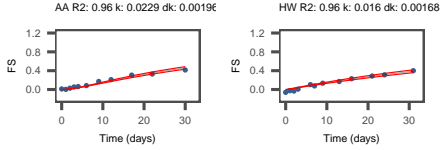

**TITIN - ELLLPVLIK\_2**

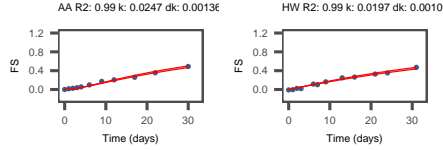

**TITIN - DQMLVQWHEPVNDGGSK\_2**

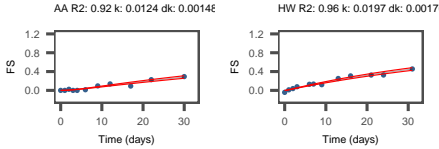

**TITIN - EAFSSVIK\_2**

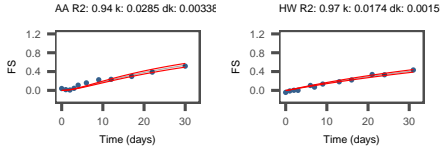

**TITIN - ELPLIFITLPSDKV\_2**

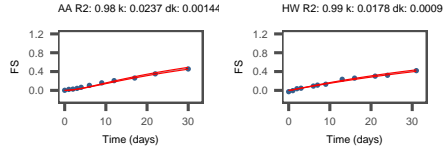

**TITIN - DSGDYTITAENSSGSK\_2**

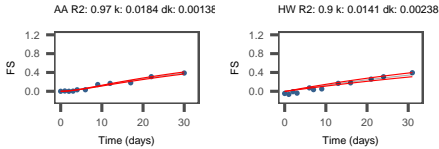

**TITIN - EDAGTYTFVQNNVGK\_2**

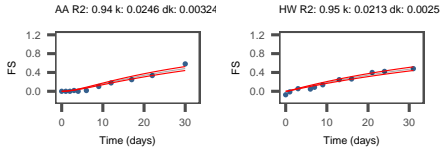

**TITIN - ENMATLTLEPAVIEK\_2**

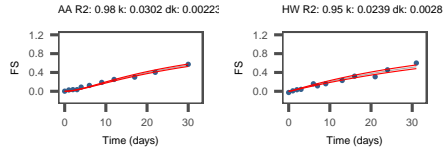

TITIN - EPPVSSFPPIVETLK\_2

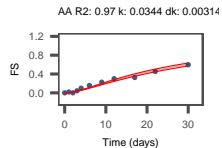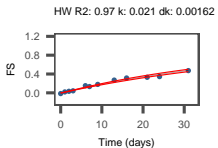

TITIN - EVLQTTIEGAEPISVAWFK\_2

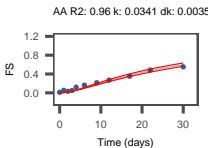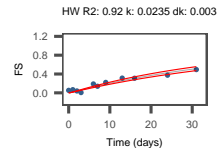

TITIN - GLLQAFELLK\_2

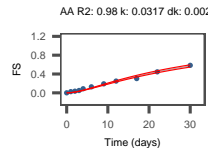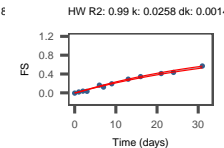

TITIN - EPQIEPTADLTGINTQLITCK\_2

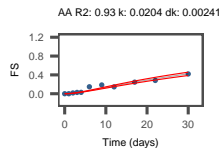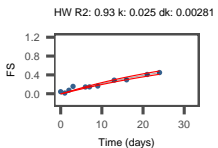

TITIN - FETEISEDHIANWK\_3

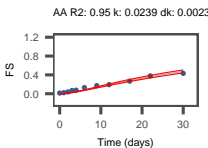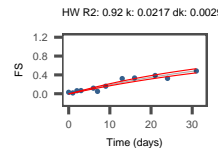

TITIN - GQPLYLSCELNK\_2

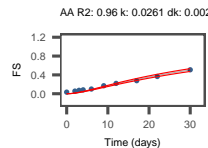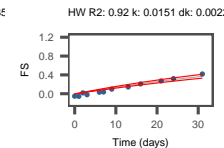

TITIN - EPTHVEESHQTTLEYGYK\_4

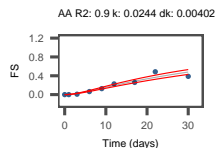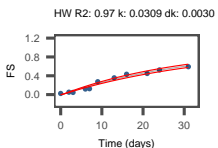

TITIN - FGISDHIDSVCVVK\_3

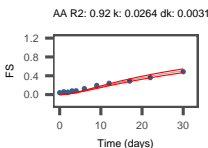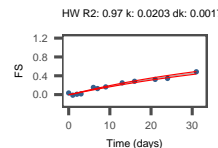

TITIN - GSPPFTVSWFK\_2

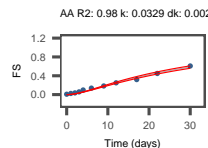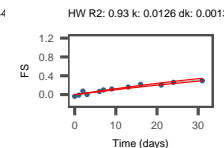

TITIN - ESFEVQWK\_2

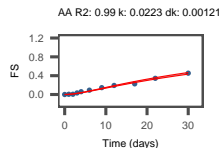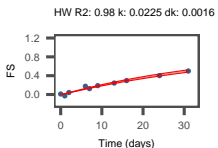

TITIN - FNTEITAENLTINLK\_2

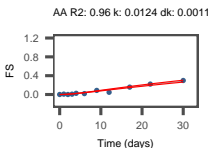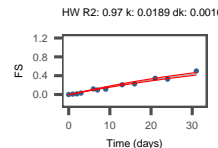

TITIN - GVPFPTLWFK\_2

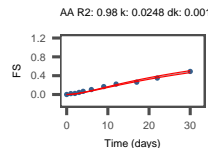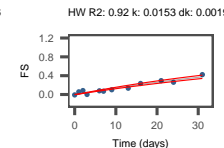

TITIN - ESGTTAWQLINSSVK\_2

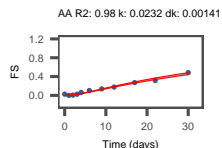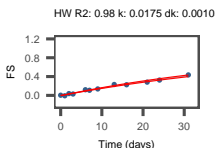

TITIN - GDAGQYTCYASNVA GK\_2

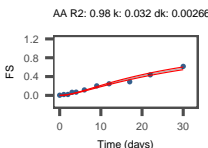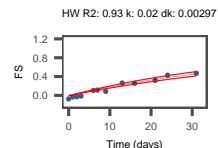

TITIN - IADFSTHLINK\_3

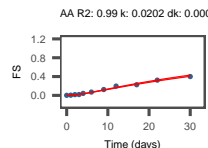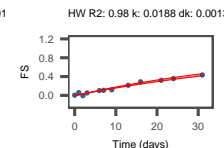

TITIN - ETSESSLELYAVK\_2

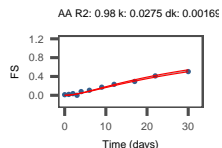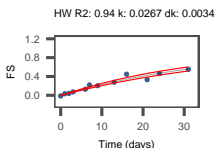

TITIN - GDSGQYTCQATNDV GK\_2

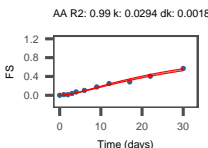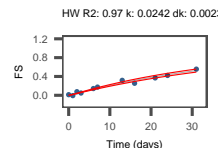

TITIN - IASLEIPLAK\_2

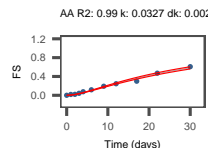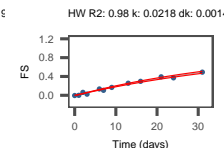

**TITIN – IDSISQDSAWYTATAINK\_2**

**TITIN – INADIAGRPLPVISWAK\_3**

**TITIN – ITDQYRPK\_2**

AA R2: 0.91 k: 0.0346 dk: 0.00523

HW R2: 0.97 k: 0.0237 dk: 0.0021

AA R2: 0.95 k: 0.0185 dk: 0.00204

HW R2: 0.95 k: 0.0158 dk: 0.0016

AA R2: 0.98 k: 0.0227 dk: 0.00146

HW R2: 0.93 k: 0.0137 dk: 0.0016

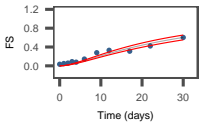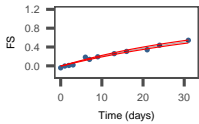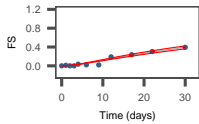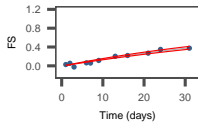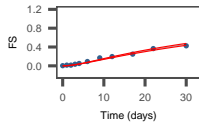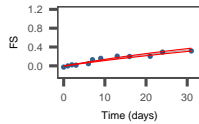

**TITIN – IDVPFIGRPPPAVTWHK\_4**

**TITIN – INVTDLSDLTLLSIK\_2**

**TITIN – ITGYVVDLFEENK\_2**

AA R2: 0.99 k: 0.0244 dk: 0.00097

HW R2: 0.94 k: 0.016 dk: 0.00182

AA R2: 0.99 k: 0.0239 dk: 0.00111

HW R2: 0.96 k: 0.0182 dk: 0.0015

AA R2: 0.97 k: 0.0228 dk: 0.00184

HW R2: 0.96 k: 0.0222 dk: 0.0020

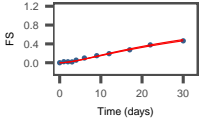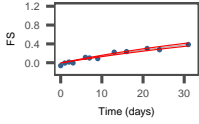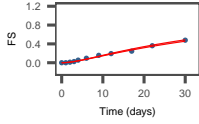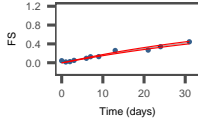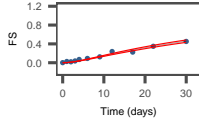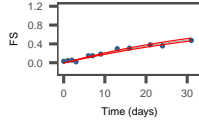

**TITIN – IEPLEVALGHLAK\_3**

**TITIN – IPVVLPEDEGIYAFASNIK\_2**

**TITIN – ITQFVVPDLQTK\_2**

AA R2: 0.99 k: 0.03 dk: 0.00188

HW R2: 0.97 k: 0.0273 dk: 0.0023

AA R2: 0.99 k: 0.0269 dk: 0.0012

HW R2: 0.95 k: 0.026 dk: 0.00237

AA R2: 0.99 k: 0.0214 dk: 0.00106

HW R2: 0.91 k: 0.0223 dk: 0.0028

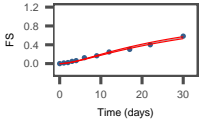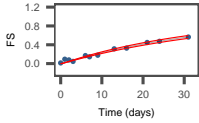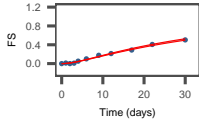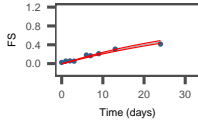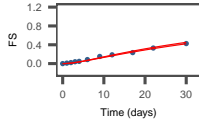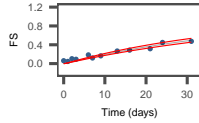

**TITIN – IHLEQCQVDEDRK\_3**

**TITIN – ISAINDAGVGEPAPVNVIVEK\_2**

**TITIN – KTPSPIEAER\_2**

AA R2: 0.9 k: 0.0188 dk: 0.00313

HW R2: 0.92 k: 0.0262 dk: 0.0039

AA R2: 0.94 k: 0.0151 dk: 0.00166

HW R2: 0.91 k: 0.02 dk: 0.00328

AA R2: 0.97 k: 0.0205 dk: 0.00157

HW R2: 0.93 k: 0.0136 dk: 0.0017

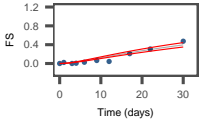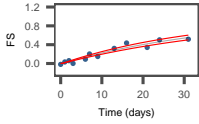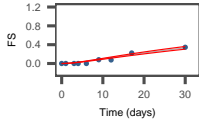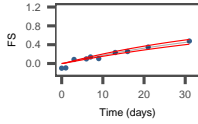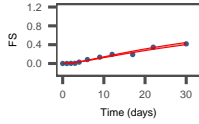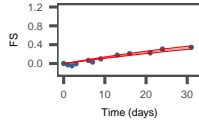

**TITIN – IIHYVVEALEK\_3**

**TITIN – ISFVDNIATLQLGSPEASQSGK\_2**

**TITIN – KTPSPIEAER\_3**

AA R2: 0.99 k: 0.0212 dk: 0.00086

HW R2: 0.94 k: 0.0244 dk: 0.0025

AA R2: 0.98 k: 0.0319 dk: 0.00213

HW R2: 0.93 k: 0.0226 dk: 0.0027

AA R2: 0.96 k: 0.026 dk: 0.00251

HW R2: 0.96 k: 0.0155 dk: 0.0012

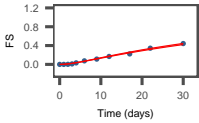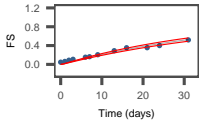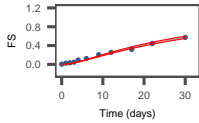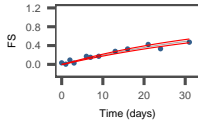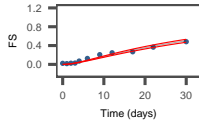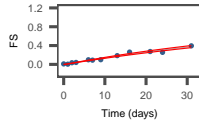

**TITIN – IMAENAAGISAPSPFYK\_2**

**TITIN – ISFVNNVATLQFAK\_2**

**TITIN – LAWTVVASEVNTSLK\_3**

AA R2: 0.96 k: 0.0236 dk: 0.00203

HW R2: 0.95 k: 0.0143 dk: 0.0015

AA R2: 0.98 k: 0.0308 dk: 0.00252

HW R2: 0.92 k: 0.0245 dk: 0.0031

AA R2: 0.97 k: 0.0245 dk: 0.00203

HW R2: 0.95 k: 0.022 dk: 0.00212

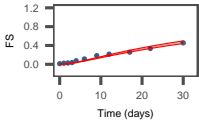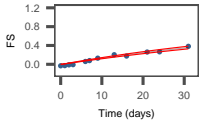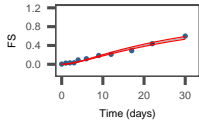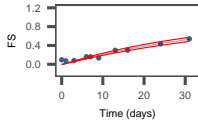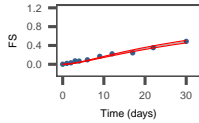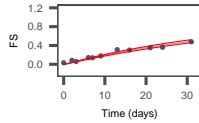

TITIN - LEADVHGKPLPTIEWLR\_4

AA R2: 0.98 k: 0.0209 dk: 0.00126

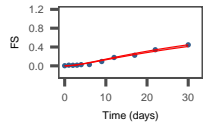

HW R2: 0.96 k: 0.0181 dk: 0.0017

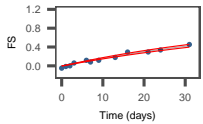

TITIN - LLFNFTVLAGEDLK\_3

AA R2: 0.96 k: 0.0223 dk: 0.00216

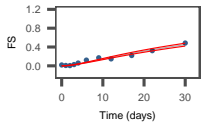

HW R2: 0.9 k: 0.0199 dk: 0.00339

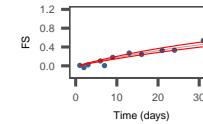

TITIN - LTWFSPEDDGGSPITNYVIQK\_2

AA R2: 0.93 k: 0.0233 dk: 0.00253

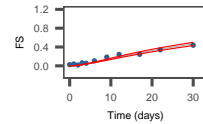

HW R2: 0.98 k: 0.02 dk: 0.00122

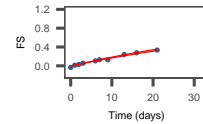

TITIN - LEDAGEVQLTAK\_2

AA R2: 0.98 k: 0.0178 dk: 0.00121

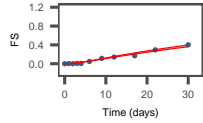

HW R2: 0.95 k: 0.0171 dk: 0.0018

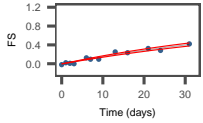

TITIN - LLLQAAPQFHPGYPLK\_3

AA R2: 0.96 k: 0.0194 dk: 0.00193

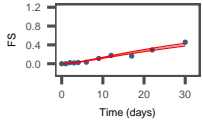

HW R2: 0.94 k: 0.0171 dk: 0.0020

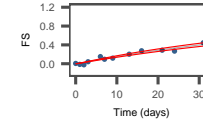

TITIN - LTWFSPEDDGGSPITNYVIQK\_3

AA R2: 0.92 k: 0.022 dk: 0.00263

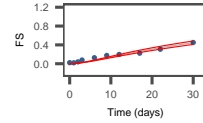

HW R2: 0.95 k: 0.019 dk: 0.00194

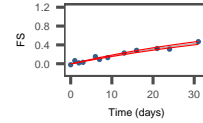

TITIN - LEVVDVTK\_2

AA R2: 0.98 k: 0.0248 dk: 0.00154

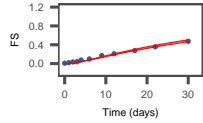

HW R2: 0.95 k: 0.0428 dk: 0.0065

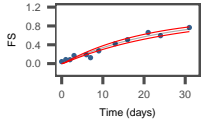

TITIN - LNSGSYELK\_2

AA R2: 0.98 k: 0.021 dk: 0.00121

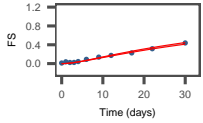

HW R2: 0.95 k: 0.0111 dk: 0.0010

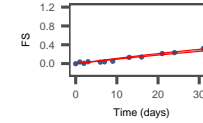

TITIN - LVPPSVELDK\_2

AA R2: 0.99 k: 0.0213 dk: 0.00106

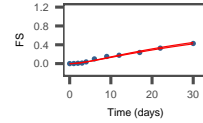

HW R2: 0.99 k: 0.0173 dk: 0.0007

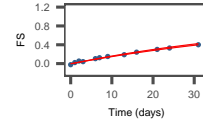

TITIN - LIVEGAVVEVK\_2

AA R2: 0.96 k: 0.0303 dk: 0.00337

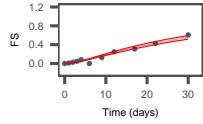

HW R2: 0.99 k: 0.032 dk: 0.00221

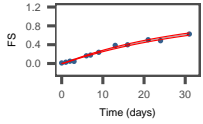

TITIN - LSDHSVEPGK\_2

AA R2: 0.99 k: 0.0305 dk: 0.00186

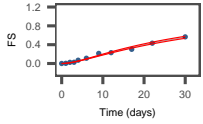

HW R2: 0.95 k: 0.0212 dk: 0.0027

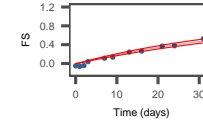

TITIN - MAHEGALTGVTTDQK\_3

AA R2: 0.97 k: 0.0331 dk: 0.0029

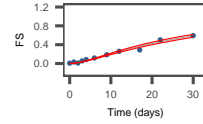

HW R2: 0.98 k: 0.0265 dk: 0.0022

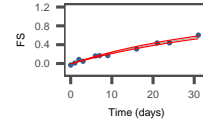

TITIN - LKENTEYNFR\_3

AA R2: 0.98 k: 0.0226 dk: 0.0013

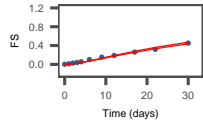

HW R2: 0.92 k: 0.016 dk: 0.0022

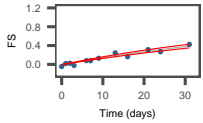

TITIN - LTDISTI GK\_2

AA R2: 0.99 k: 0.0333 dk: 0.00215

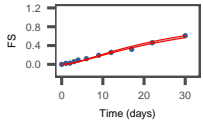

HW R2: 0.96 k: 0.0202 dk: 0.0020

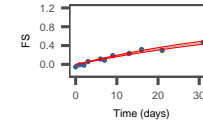

TITIN - MGASDPSDSSDPQAK\_2

AA R2: 0.99 k: 0.0189 dk: 0.00066

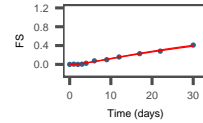

HW R2: 0.91 k: 0.0202 dk: 0.0023

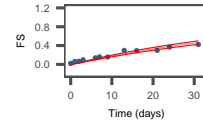

TITIN - LLERPPEFTLPLYNK\_3

AA R2: 0.99 k: 0.0203 dk: 0.00081

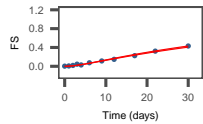

HW R2: 0.95 k: 0.0153 dk: 0.0015

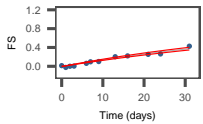

TITIN - LTQTEPVLTK\_2

AA R2: 0.99 k: 0.0313 dk: 0.00201

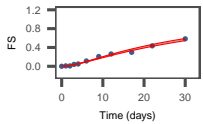

HW R2: 0.98 k: 0.0225 dk: 0.0018

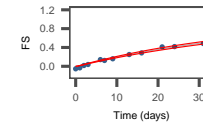

TITIN - MTASEALQPWLK\_3

AA R2: 0.94 k: 0.0208 dk: 0.00216

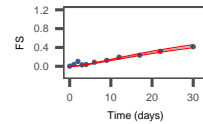

HW R2: 0.96 k: 0.015 dk: 0.00135

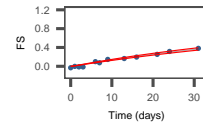



TITIN - NAAHEDGGIYSLVENPAGTK\_3

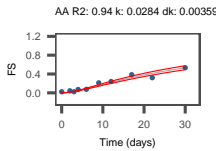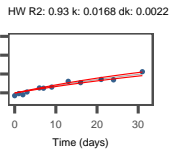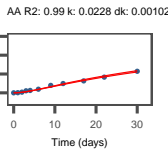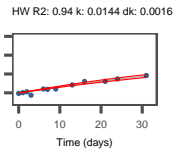

TITIN - QLITFTQELQDVVAK\_2

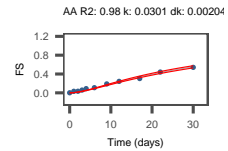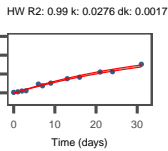

TITIN - NAFVTPGPPSPEVTK\_2

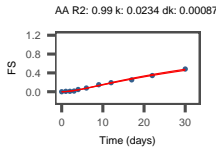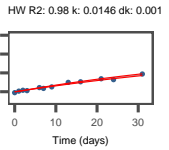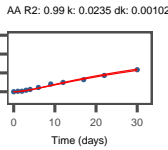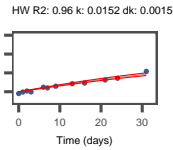

TITIN - QLSVPIAK\_2

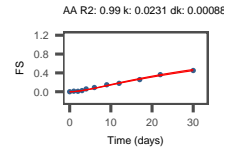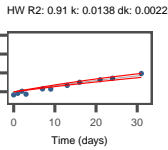

TITIN - NCAMADESVYGFK\_2

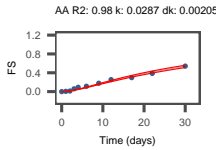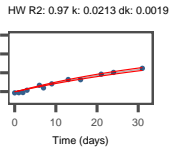

TITIN - PGPSTPEASAITK\_2

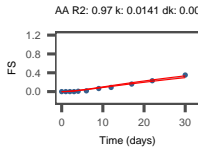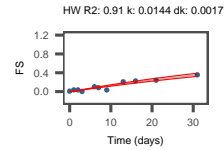

TITIN - QNATVGLIQGK\_2

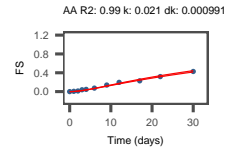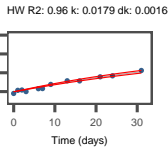

TITIN - NSFTIPSPGPIEEVGAGK\_2

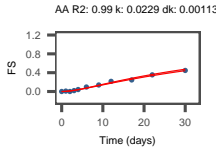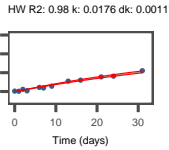

TITIN - PIALQLSDQK\_2

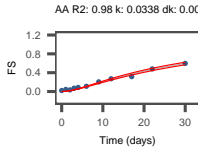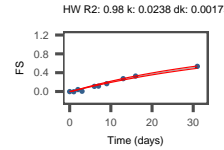

TITIN - RIEPLEVALGHLAK\_3

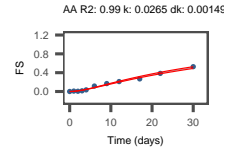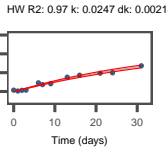

TITIN - NSVLSLWEPKPDGGSR\_3

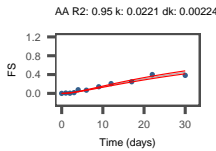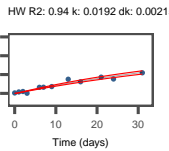

TITIN - PLPVISWAK\_2

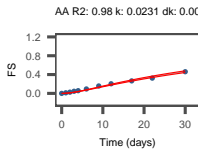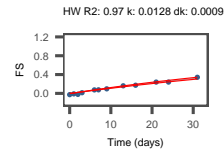

TITIN - RTEEGYEAITAVELK\_3

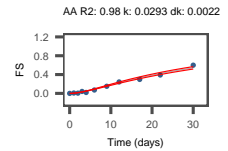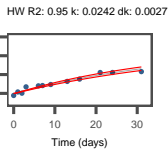

TITIN - NSVLSLWEPKPDGGSR\_4

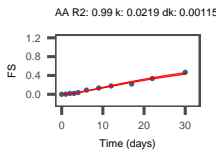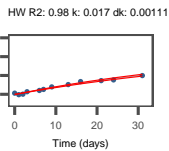

TITIN - QLGVPIAK\_2

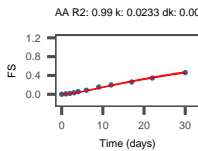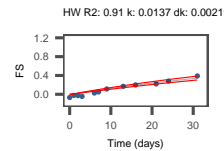

TITIN - SAFQGSAPLTIK\_2

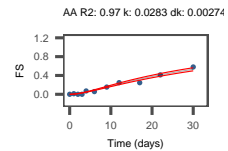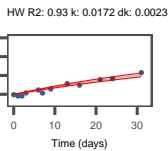

TITIN - SDIGQYTCDCGDTQTS GK\_2

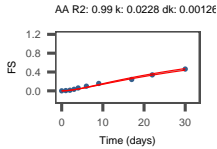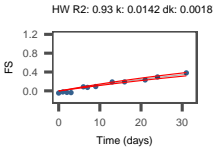

TITIN - SISLAWTK\_2

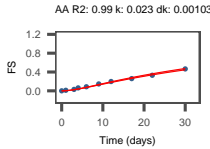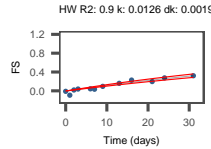

TITIN - STAELYLTK\_2

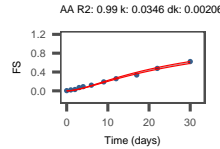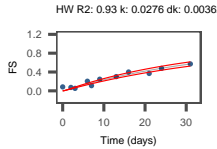

TITIN - SDVPIQAPHFK\_3

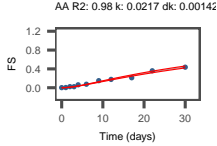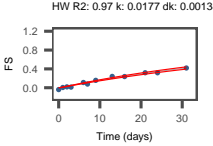

TITIN - SLAVPIAK\_2

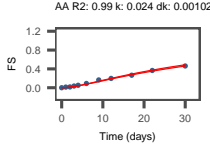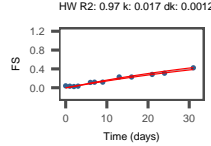

TITIN - TCILELSSTK\_2

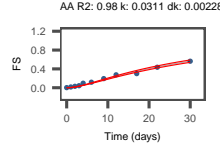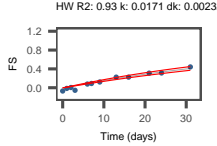

TITIN - SGGNYQISYLENSAHLTVK\_3

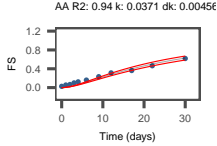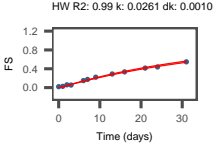

TITIN - SSATFQSTVAGSPISITWLK\_2

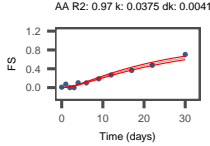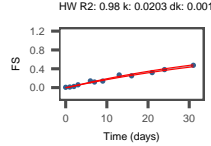

TITIN - TEAYAVSSFK\_2

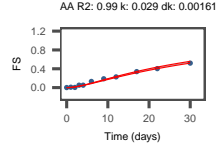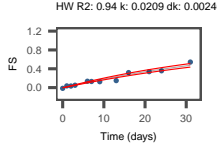

TITIN - SIHEQVSSISETTK\_3

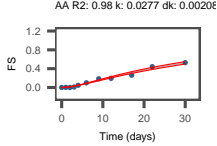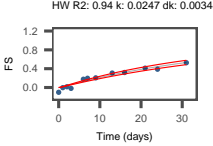

TITIN - SSAVALWLPDHDGGR\_3

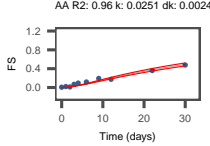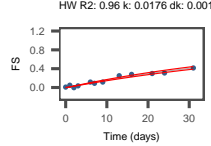

TITIN - TFLDQQLVSLQVLK\_2

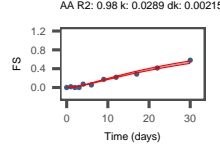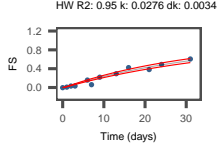

TITIN - SIILEGTYGTLPISVTWK\_2

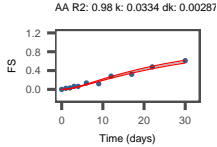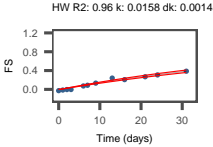

TITIN - SSVFLSWTK\_2

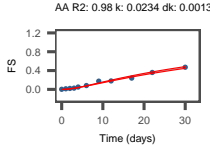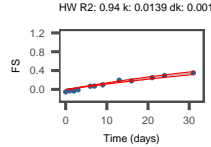

TITIN - TKPDSDWIVITSLR\_3

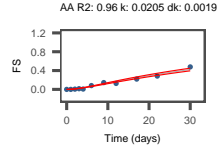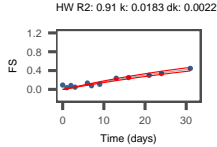

TITIN - SISGEINVNIAPPSAPK\_2

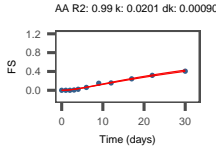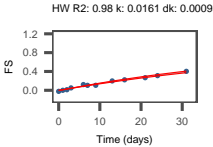

TITIN - SSWFDGK\_2

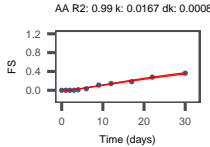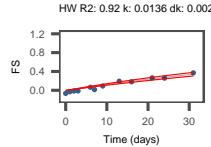

TITIN - TSVSLAWSPEDEGGSK\_2

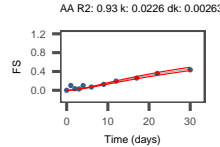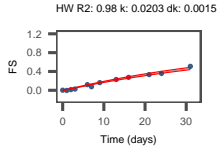



TITIN - VLDTPPSPVNLK\_2

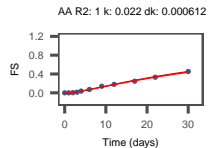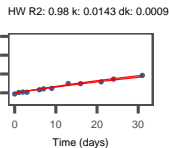

TITIN - VNVEETATSTLHK\_3

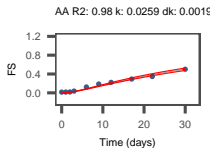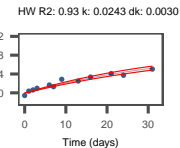

TITIN - VSAQNTFGISEPLEVASIIVK\_3

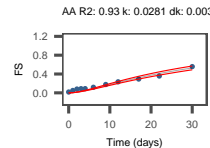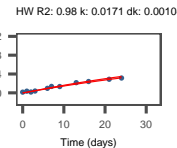

TITIN - VLGIPVIAK\_2

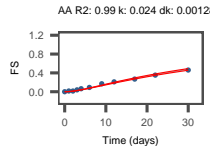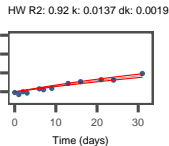

TITIN - VPAPAEVPTPTLVSLGK\_2

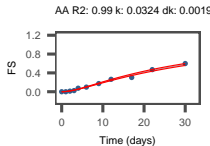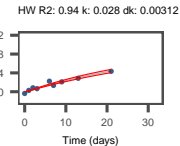

TITIN - VSAVNIQGQK\_2

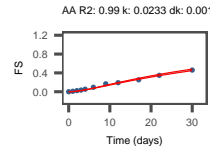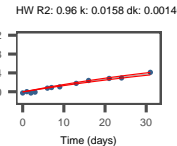

TITIN - VLPITDLSTMPQK\_2

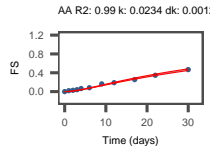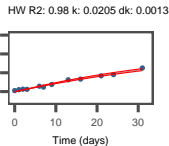

TITIN - VPGPPGTPFVTLASK\_2

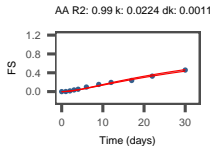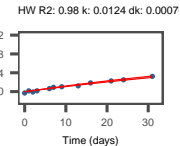

TITIN - VSGIPATLK\_2

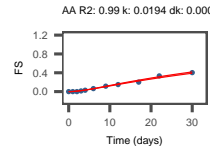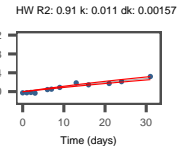

TITIN - VLVLDPKGPFR\_3

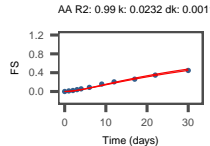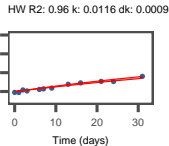

TITIN - VPGPPGTPQVTAVTK\_2

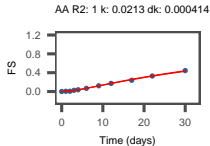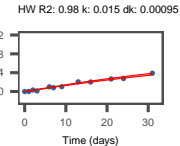

TITIN - VSGSAPISVGWFLDNGEISSPK\_3

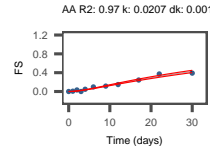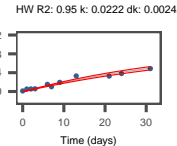

TITIN - VMAENEFVGVPETSDAVK\_2

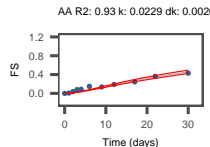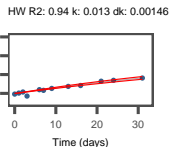

TITIN - VSAENAAGVGPSPATVYVK\_2

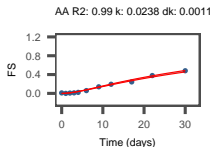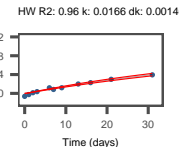

TITIN - VTAENPEGVTEHK\_3

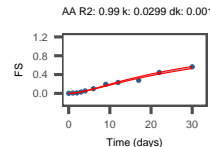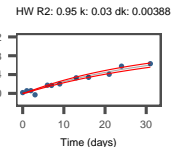

TITIN - VNAESTENSLTIK\_2

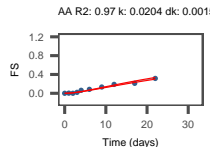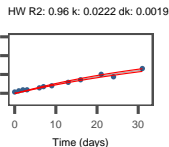

TITIN - VSAQNTFGISEPLEVASIIVK\_2

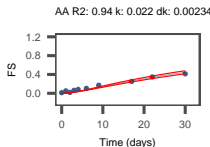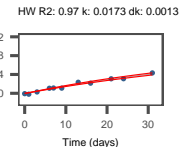

TITIN - VYAENIAGIGK\_2

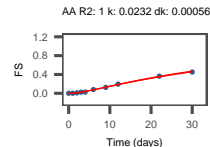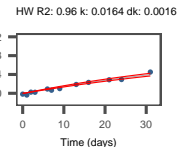

TITIN - VYAENSAGLSSPSPDK\_2

TITIN - YGVGDPILTEPIAK\_2

TNNC2 - AAFDMFDADGGGDISVK\_3

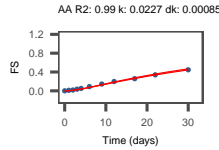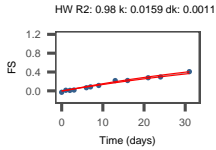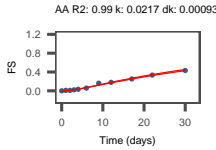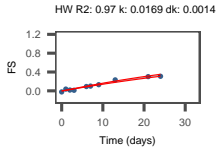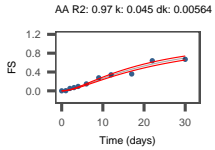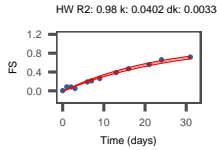

TITIN - WEPPLDDGGSEIINYTKL\_2

TITIN - YGVGEPLESAPVLMK\_2

TNNC2 - ASGEHVTEEEIESLMK\_3

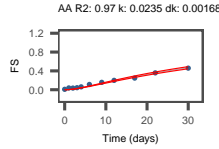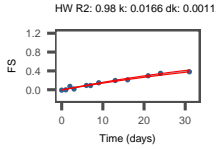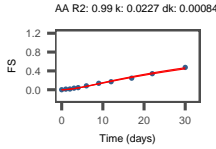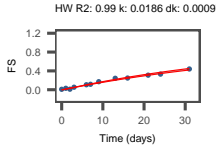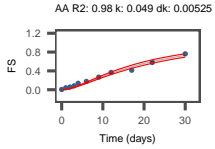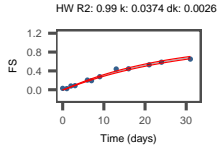

TITIN - WLEVINITK\_2

TITIN - YGVGPGITSASVVANYPFK\_2

TNNC2 - GKSEELAEFCR\_2

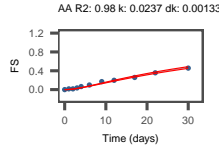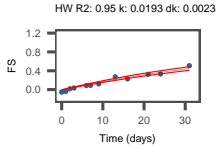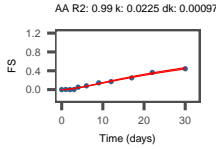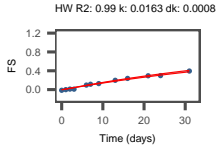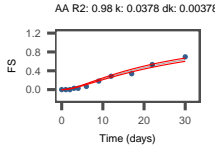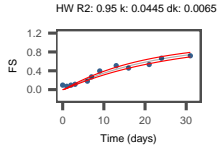

TITIN - YDGGSHVTNYVLK\_3

TITIN - YGVSEPLASNIIVAK\_2

TNNC2 - IDFDEFK\_2

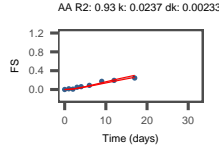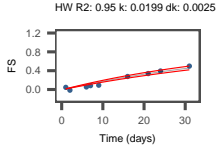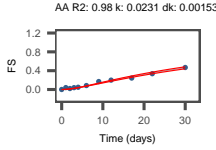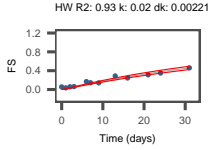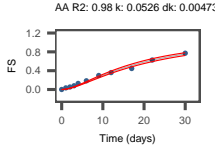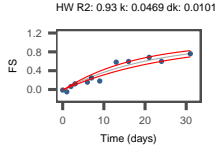

TITIN - YEITAANSSTTK\_2

TITIN - YGVSGDQTLTIK\_2

TNNI2 - MSADAMLK\_2

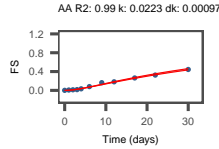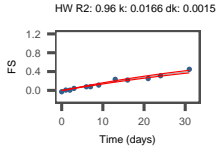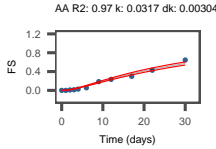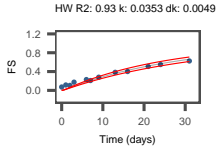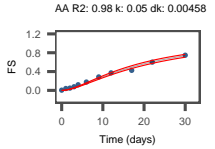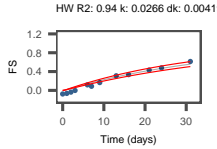

TITIN - YFLTENTAGVK\_2

TITIN - YVITATNSCGSK\_2

TNNI2 - SVMLQIAATELEKEESR\_2

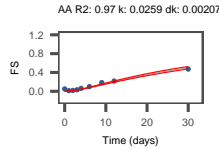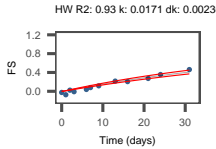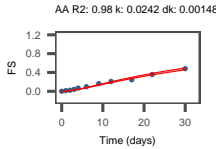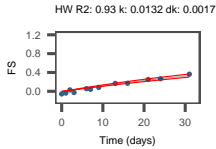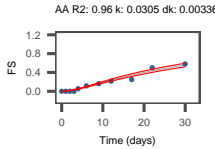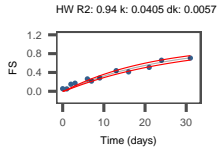

TNNT1(Non-Unique) – EEEELIALK\_2

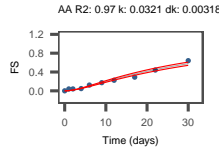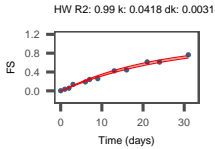

TPIS – HVFGSEDLIGQK\_3

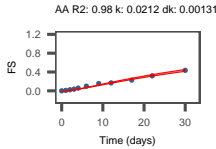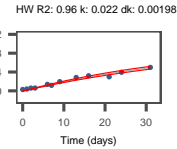

TPM1(Non-Unique) – KATDAEADVASLNR\_2

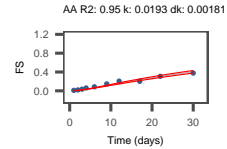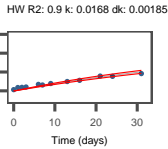

TNNT3 – ELWDTLYQLETDK\_2

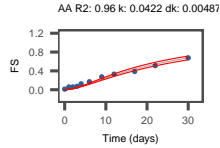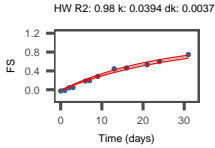

TPIS – IAVAQNCYK\_2

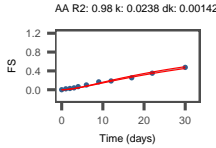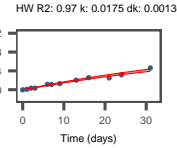

TPM1 – KLVIESDLER\_2

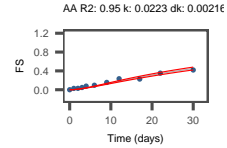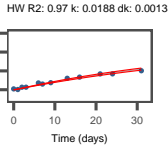

TNNT3 – NIDHLSDDKLR\_3

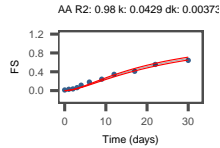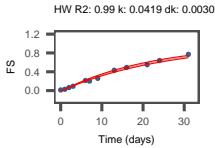

TPIS – TATPQAQEVHEK\_2

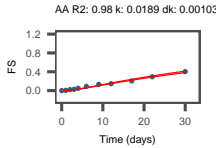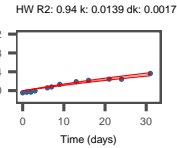

TPM1 – KLVIESDLER\_3

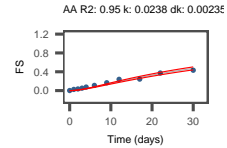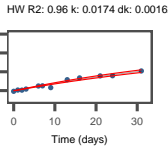

TNNT3 – VDFDDIQK\_2

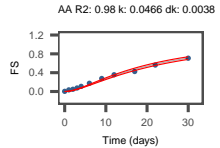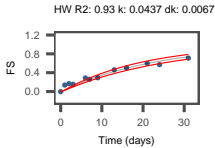

TPIS – TATPQAQEVHEK\_3

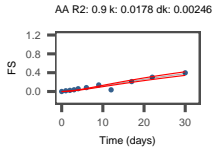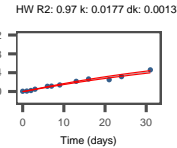

TPM1(Non-Unique) – LDKENALDR\_2

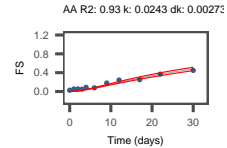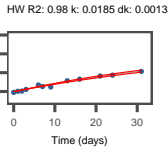

TPIS – FFFGGNWK\_2

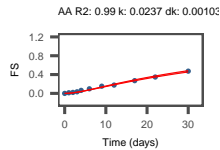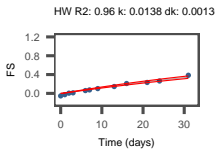

TPIS – VSHALAEGLVIACIGEK\_3

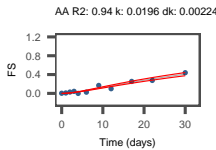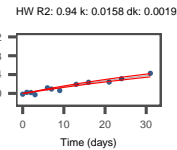

TPM1 – SIDDELEVAQK\_3

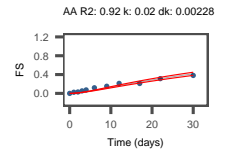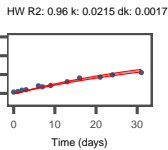

TPIS – HVFGSEDLIGQK\_2

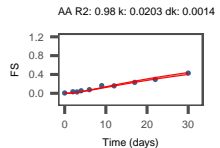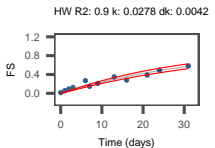

TPIS – VVLAYEPVWAGTGK\_3

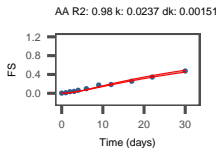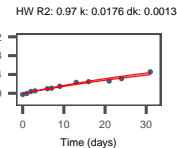

TPM2 – TIDDELEVAQK\_2

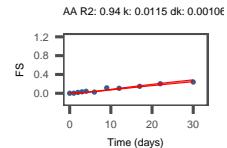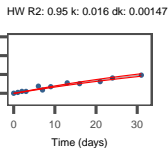

TPM3(Non-Unique) – LATALQK\_2

UGPA – TLDGGLNVIQLETAVGAAIK\_3

VDAC3 – AADFQLHHTHVNDGTEFGGSIYQK\_4

AA R2: 0.95 k: 0.0196 dk: 0.00184

HW R2: 0.98 k: 0.0151 dk: 0.0009

AA R2: 0.98 k: 0.0604 dk: 0.00684

HW R2: 0.98 k: 0.0722 dk: 0.0086

AA R2: 0.96 k: 0.0265 dk: 0.0029

HW R2: 0.92 k: 0.0305 dk: 0.0045

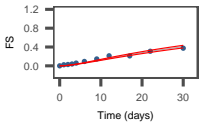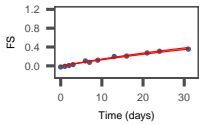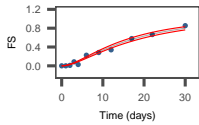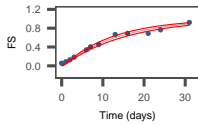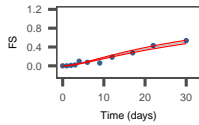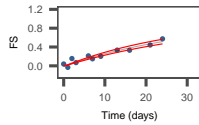

TRFE – HQTVLNDTEGK\_2

VDAC1 – GYGFGLIK\_2

VDAC3(Non-Unique) – LTLALIDGK\_2

AA R2: 0.96 k: 0.574 dk: 0.237

HW R2: 0.98 k: 0.343 dk: 0.0531

AA R2: 0.98 k: 0.0436 dk: 0.00411

HW R2: 0.96 k: 0.022 dk: 0.00251

AA R2: 0.94 k: 0.0389 dk: 0.00584

HW R2: 0.97 k: 0.0273 dk: 0.0025

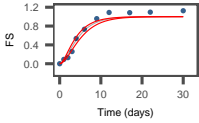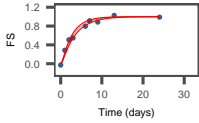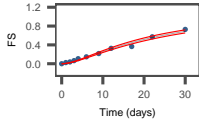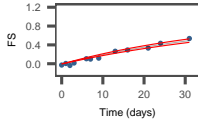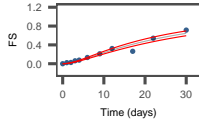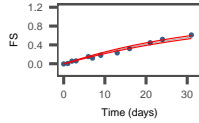

UBB(Non-Unique) – TITLVEPSTIENVK\_2

VDAC1 – LTFDSSFSPNTGK\_2

AA R2: 0.98 k: 1.06 dk: 0.367

HW R2: 0.95 k: 0.377 dk: 0.0761

AA R2: 0.96 k: 0.0438 dk: 0.00586

HW R2: 0.96 k: 0.0216 dk: 0.00186

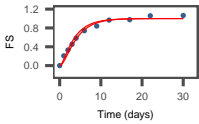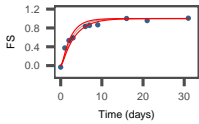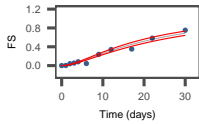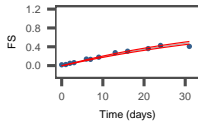

UBB(Non-Unique) – TLSDYNIQK\_2

VDAC1 – YQVDPACFSAK\_2

AA R2: 0.97 k: 1.44 dk: 0.754

HW R2: 0.91 k: 0.244 dk: 0.0652

AA R2: 0.98 k: 0.0394 dk: 0.0038

HW R2: 0.99 k: 0.0269 dk: 0.00115

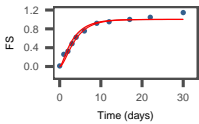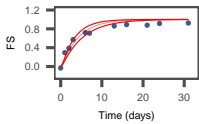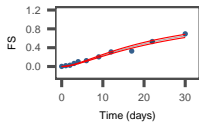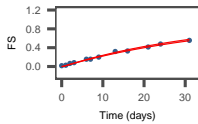

UCRI – NVVQFVSSMSASADVLAMSK\_3

VDAC1 – YQVDPACFSAK\_2

AA R2: 0.95 k: 0.0452 dk: 0.00656

HW R2: 0.97 k: 0.0256 dk: 0.0027

AA R2: 0.98 k: 0.04 dk: 0.00394

HW R2: 0.98 k: 0.0281 dk: 0.00203

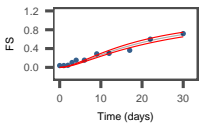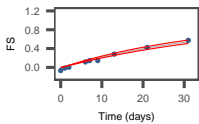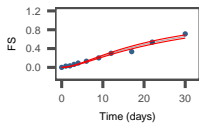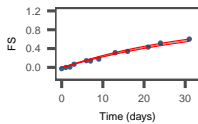

UGPA – TLDGGLNVIQLETAVGAAIK\_2

VDAC2 – VNSSLIGVYQTLRPGVK\_3

AA R2: 0.94 k: 0.0698 dk: 0.014

HW R2: 0.98 k: 0.0782 dk: 0.0081

AA R2: 0.98 k: 0.0369 dk: 0.00282

HW R2: 0.95 k: 0.0222 dk: 0.00249

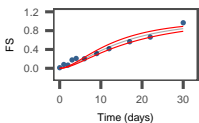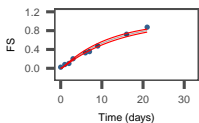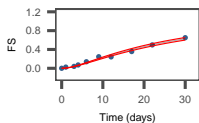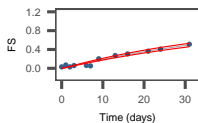

Supplement: mmc5.pdf [file mmc5.pdf]
