# Supplementary material for: Harmonizing Labeling and Analytical Strategies to Obtain Protein Turnover Rates in Intact Adult Animals
Source: PubMed Central journal article supplement (PMC9249856; doi:10.1016/j.mcpro.2022.100252), 2022-05-28

1433E

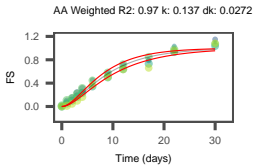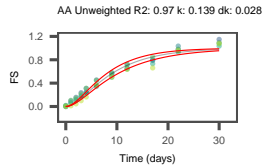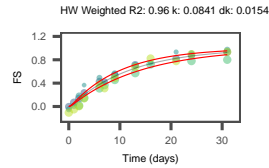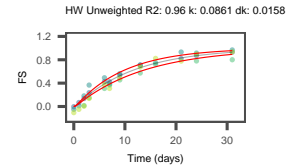

1433G

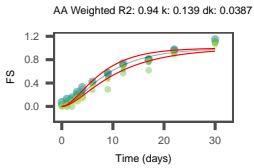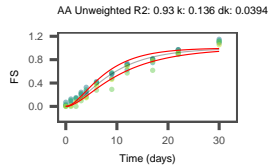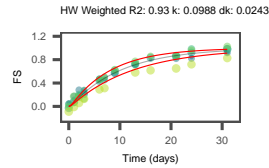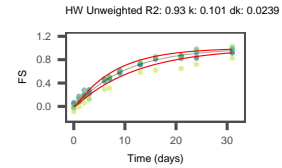

1433Z

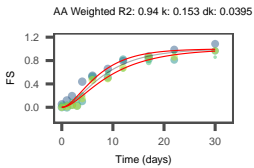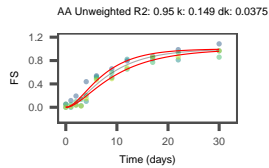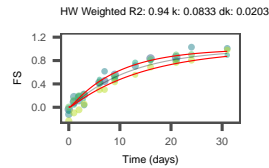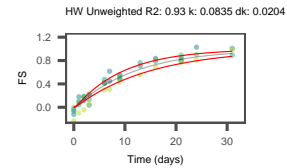

2AAA

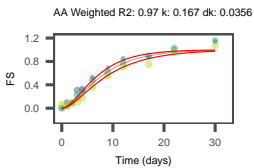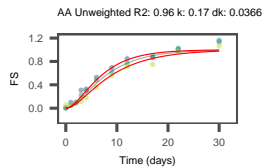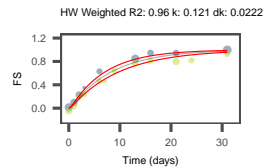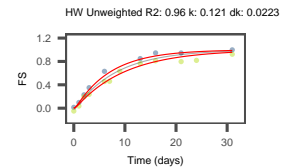

3HIDH

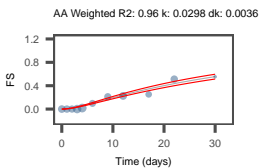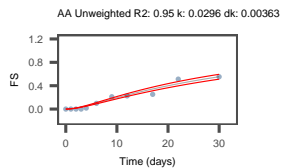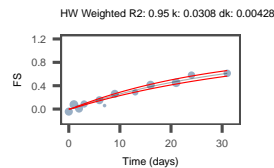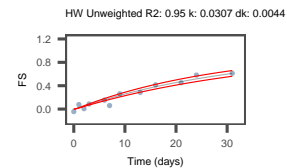

5NT3A

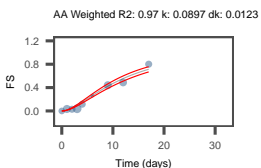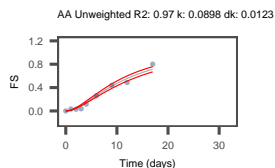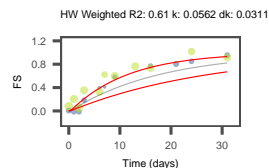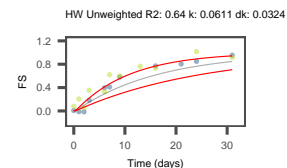

6PGL

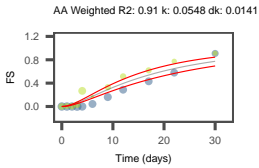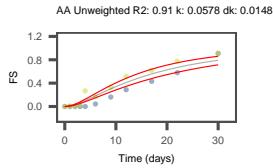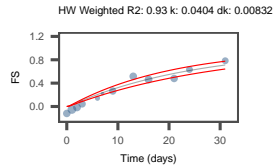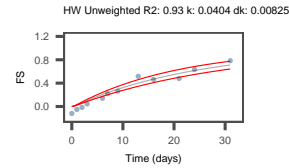

A1AT2

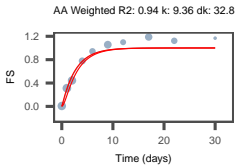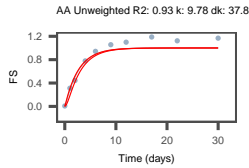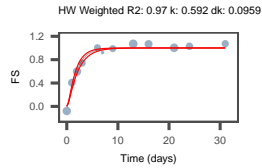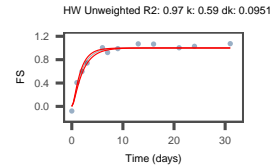

AATC

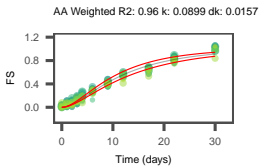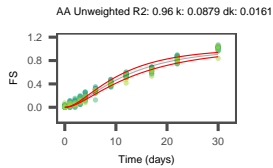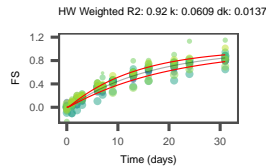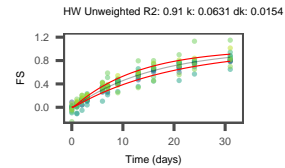

AATM

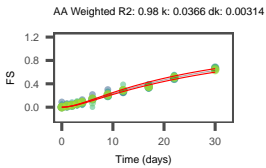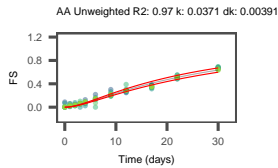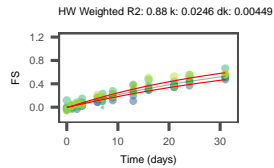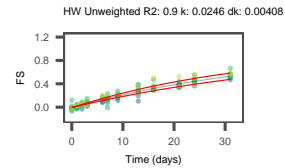

ABCB7

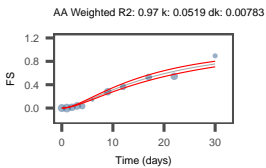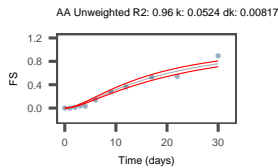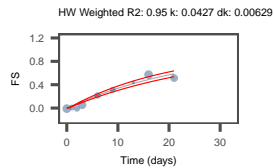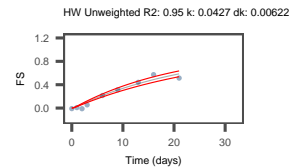

ABEC2

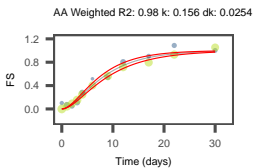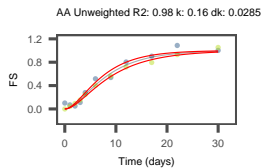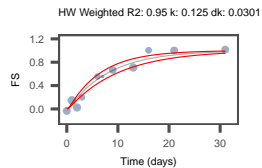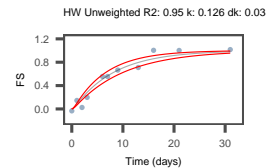

## ABLM1

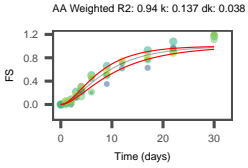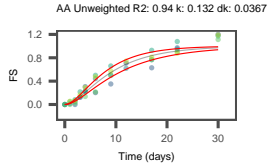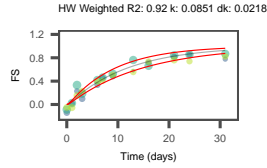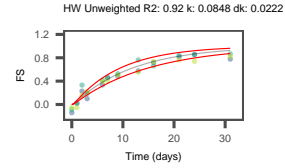

## ACADL

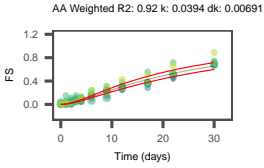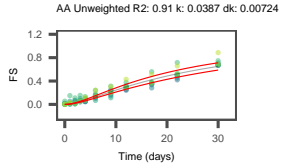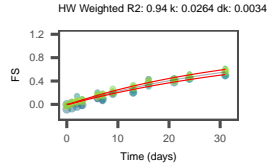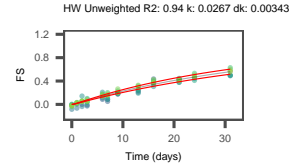

## ACADM

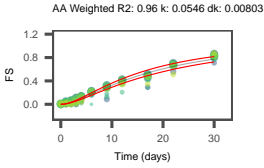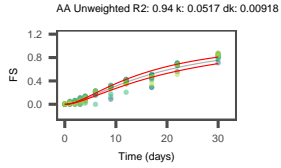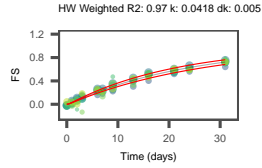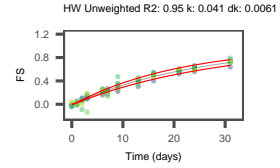

## ACADS

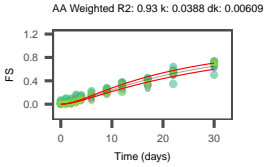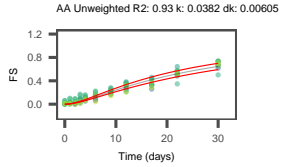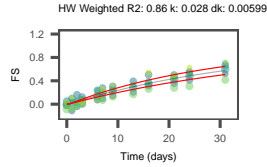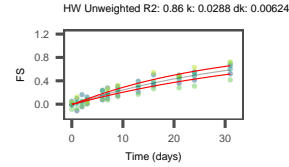

## ACADV

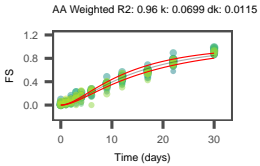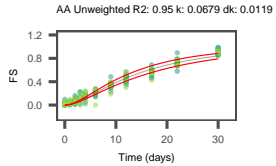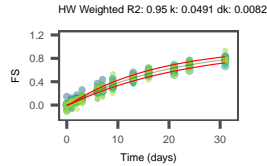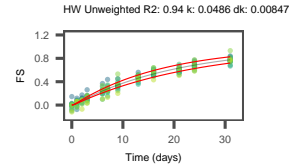

## ACBP

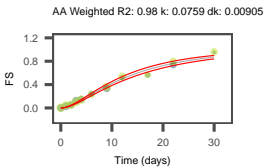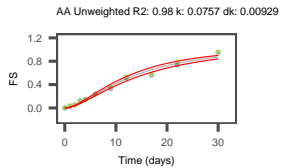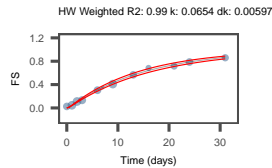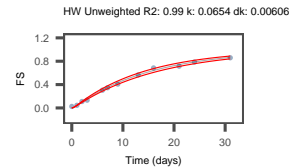

## ACD10

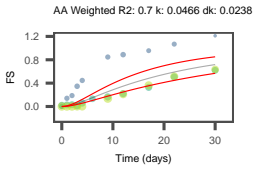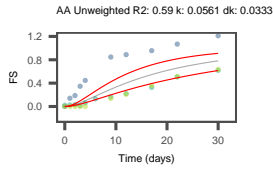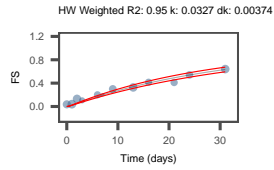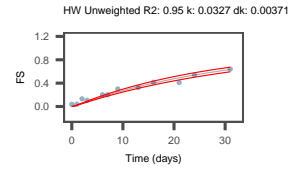

## ACDSB

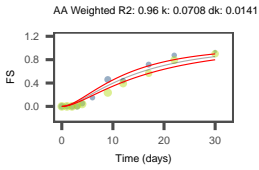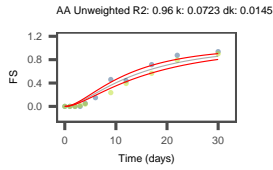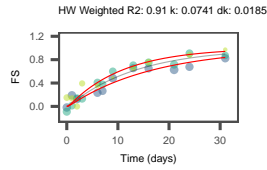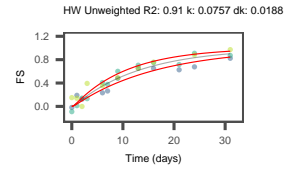

## ACO13

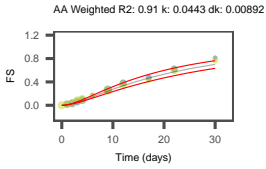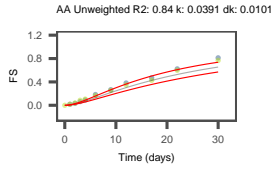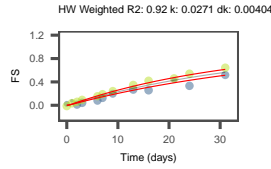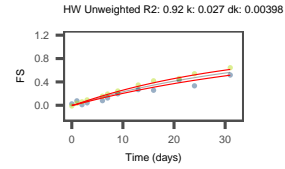

## ACOC

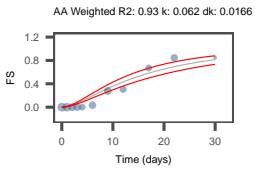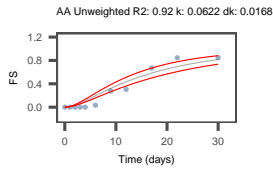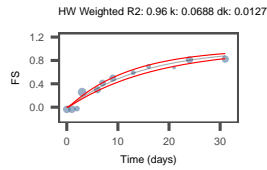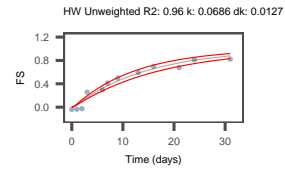

## ACON

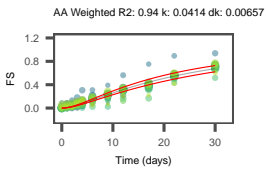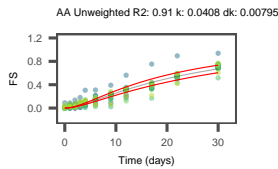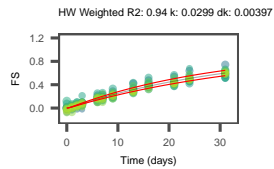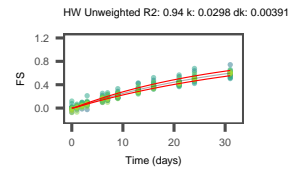

## ACOT2

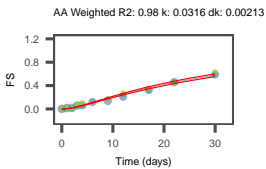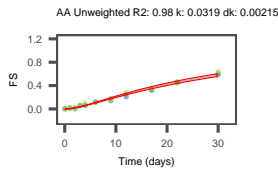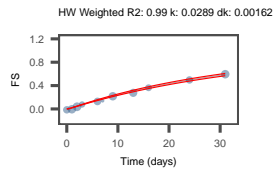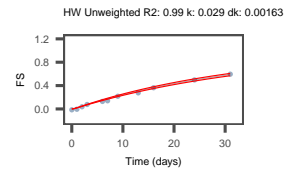



## ACOX1

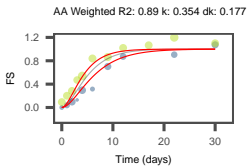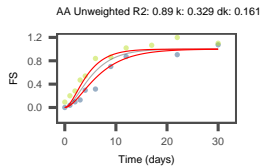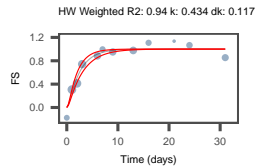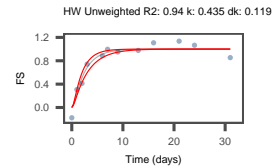

## ACPM

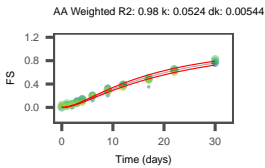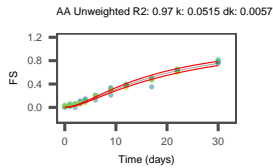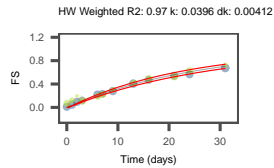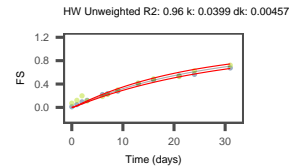

## ACSL2

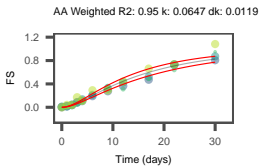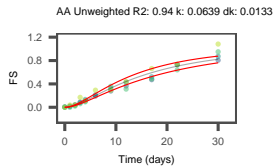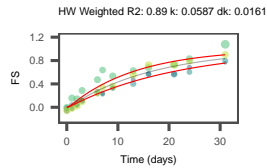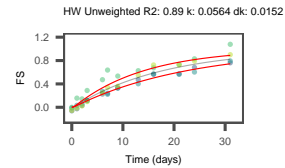

## ACSF2

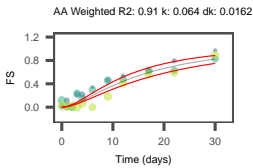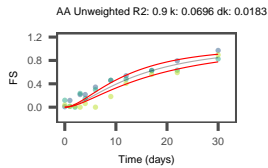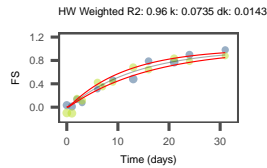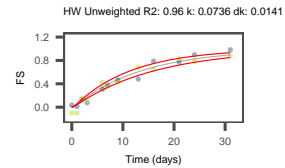

## ACSL1

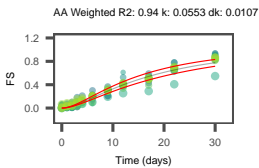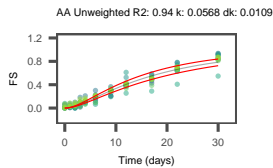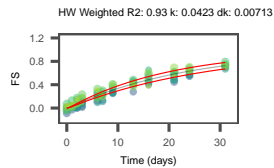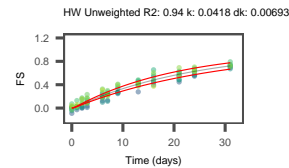

## ACTN2

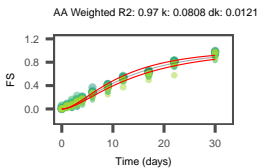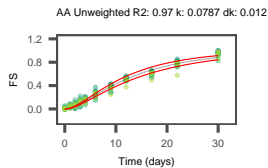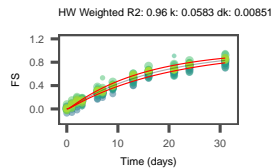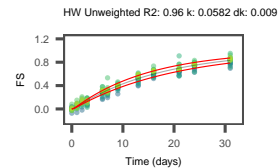

## ACYP1

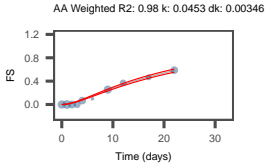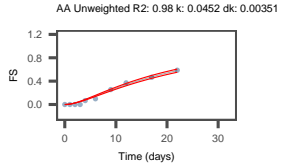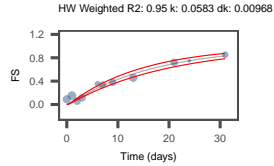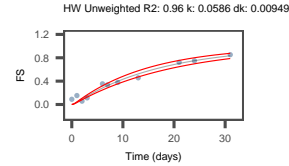

## ADIPO

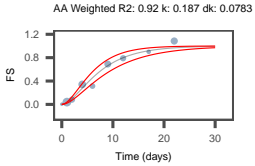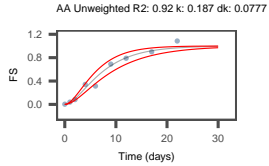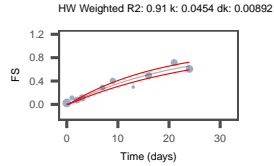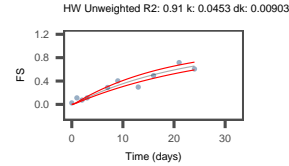

## ADK

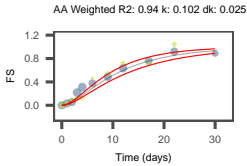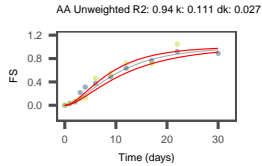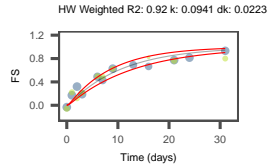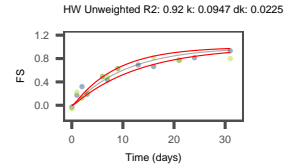

## ADT1

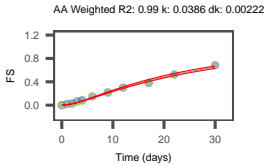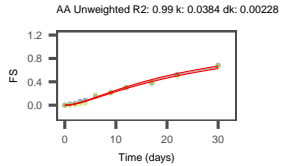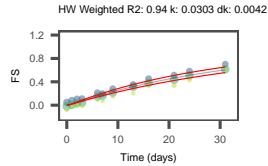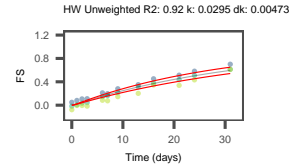

## ADT2

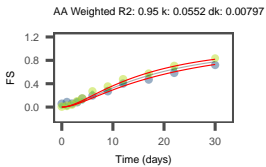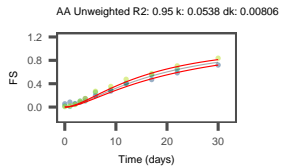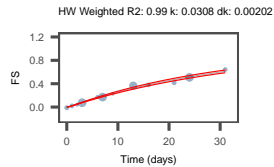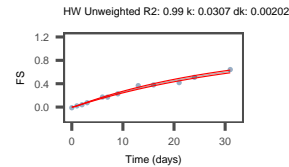

## AIFM1

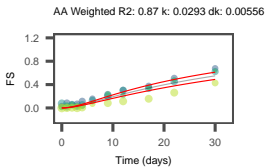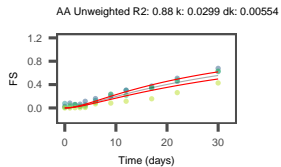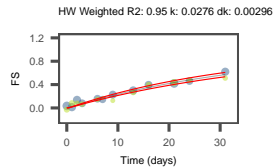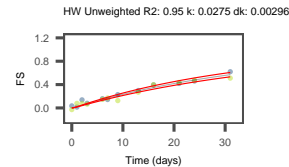

## AL4A1

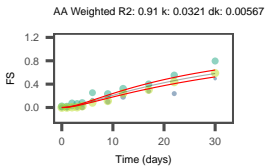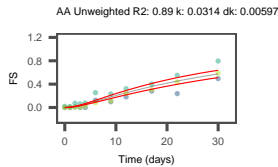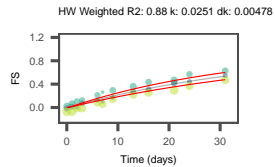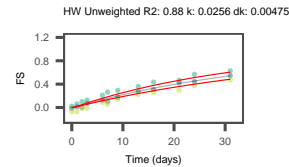

## ALBU

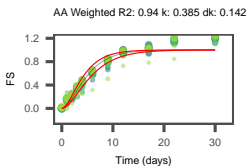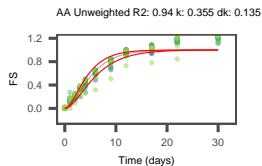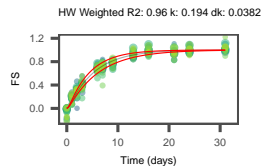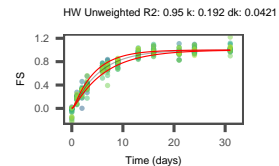

## ALDH2

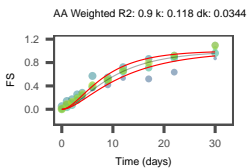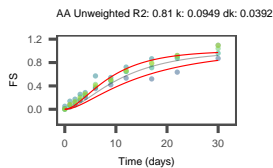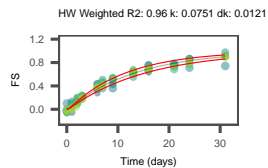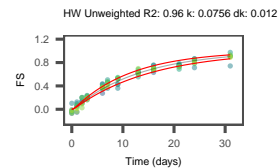

## ALDOA

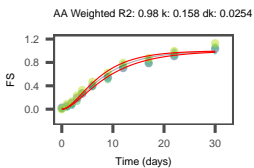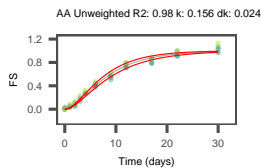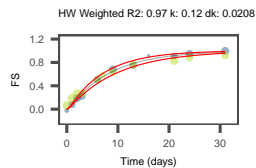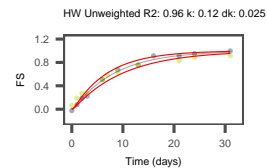

## ALDR

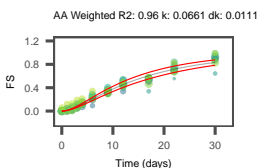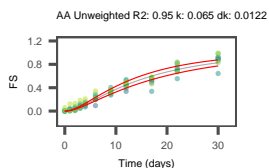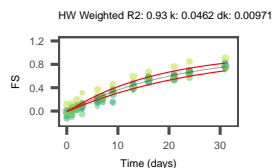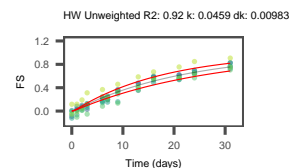

## ANXA2

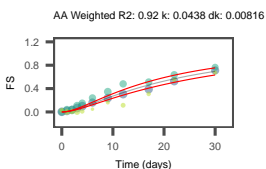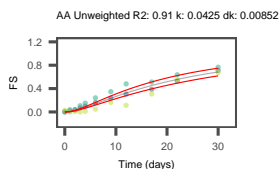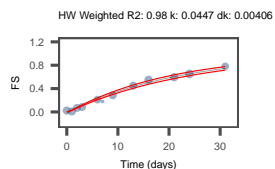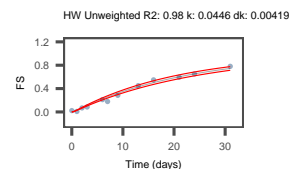

## ANXA6

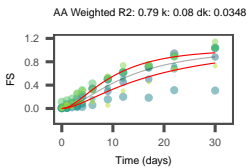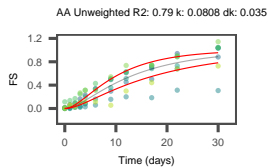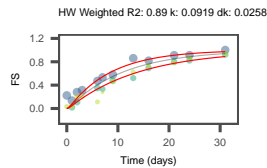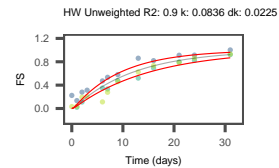

## AOFB

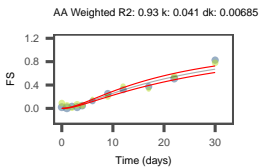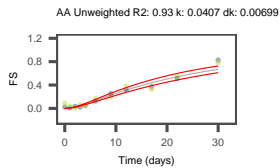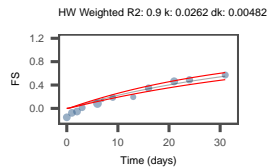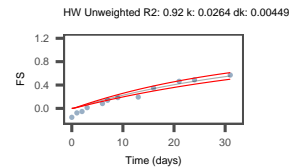

## APOA1

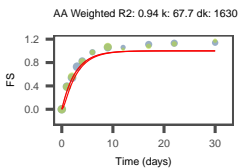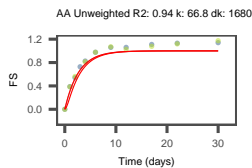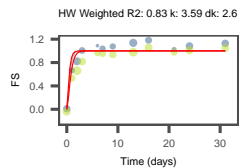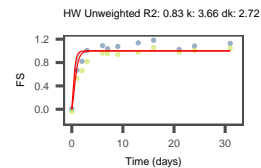

## ARHL1

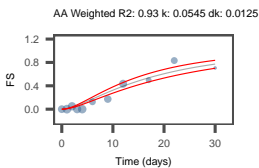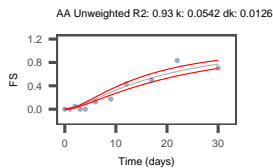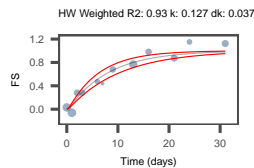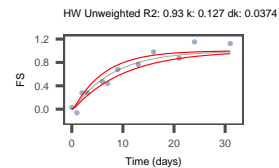

## AT1A1

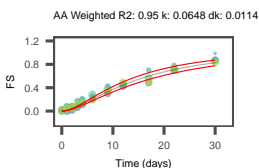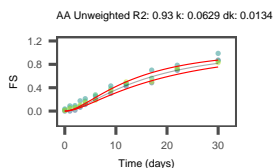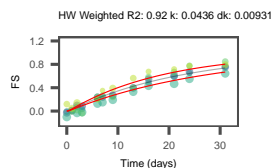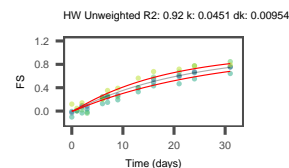

## AT1B1

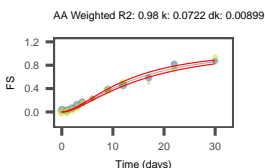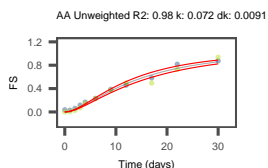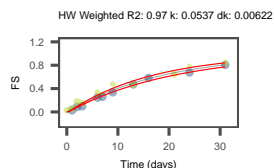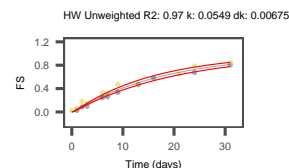

## AT2A2

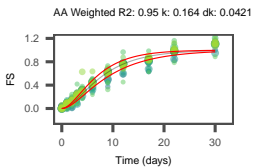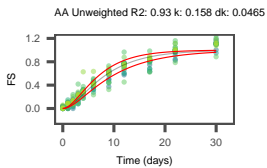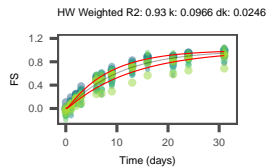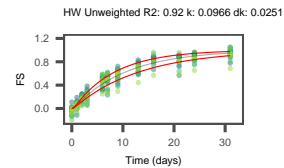

## AT5F1

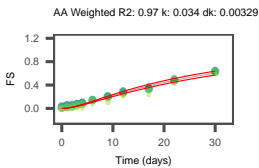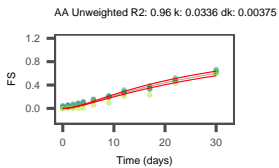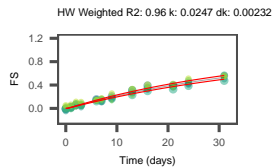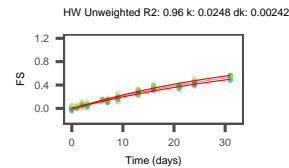

## ATP5H

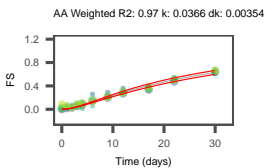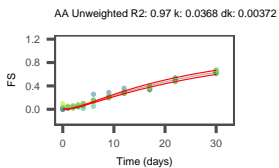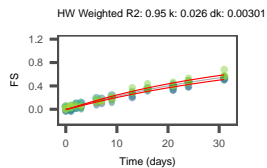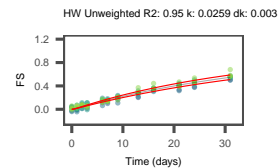

## ATP5I

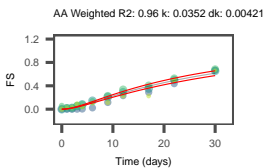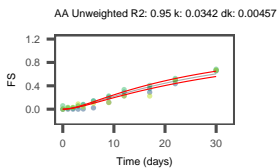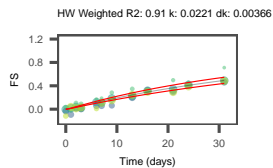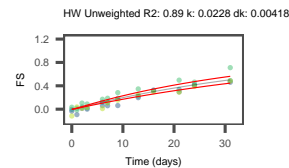

## ATP5J

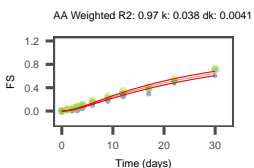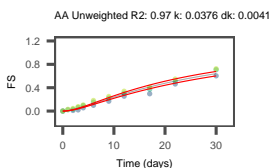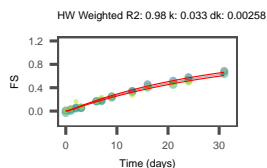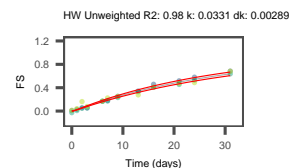

## ATP5L

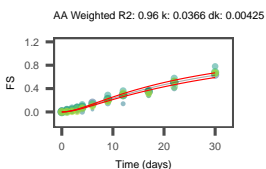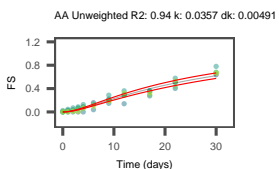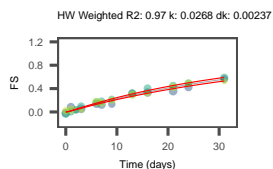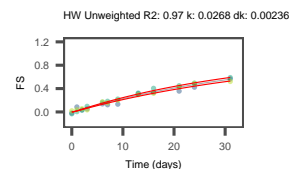

## ATPA

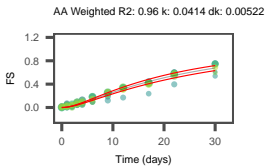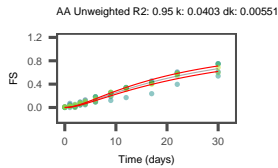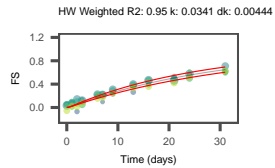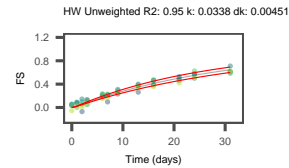

## ATPB

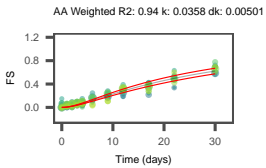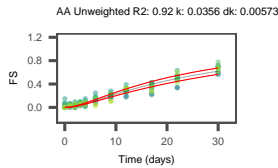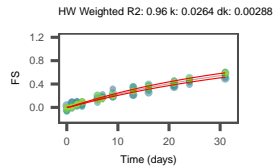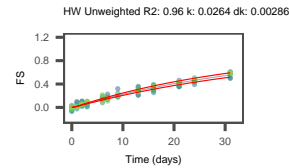

## ATPD

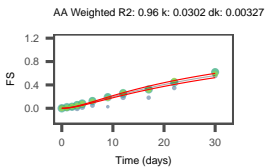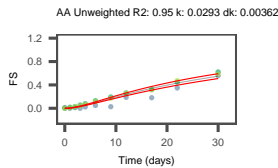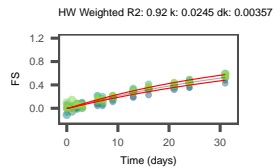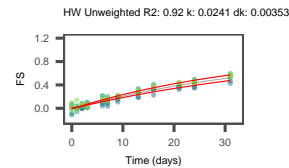

## ATPG

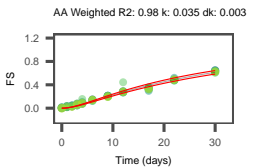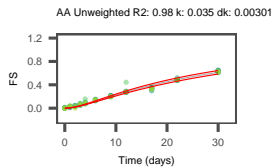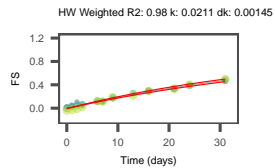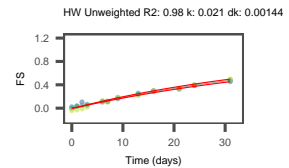

## ATPO

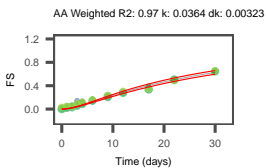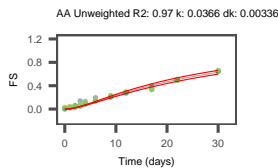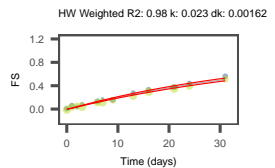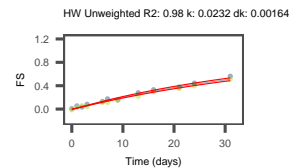

## BAG3

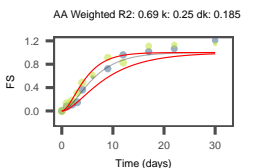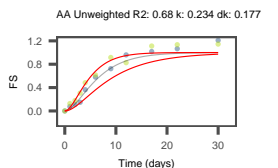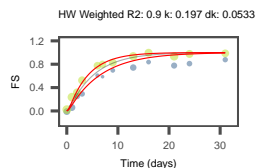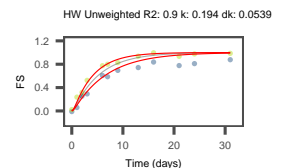

## BASI

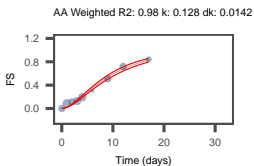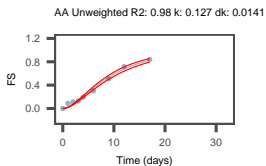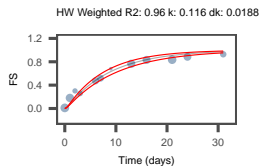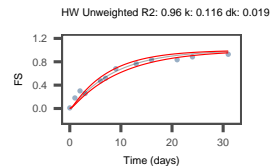

## BCAT2

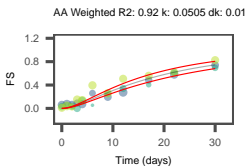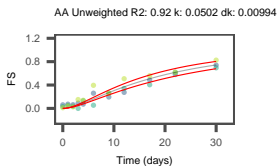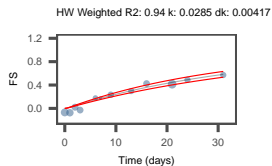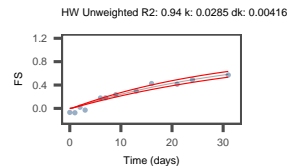

## BDH

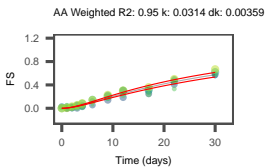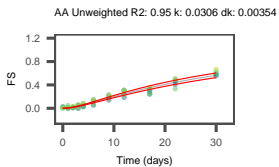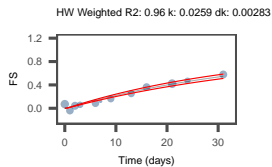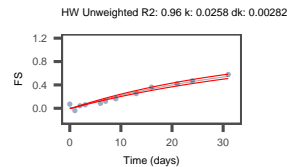

## BIP

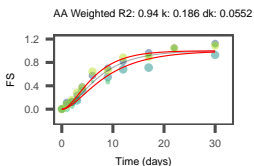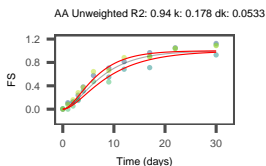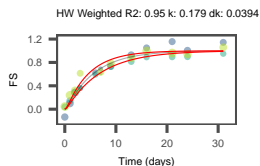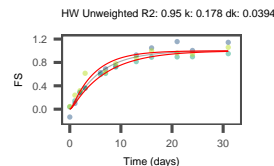

## BOLA3

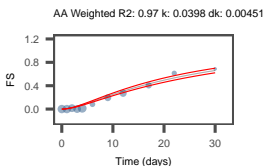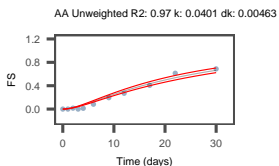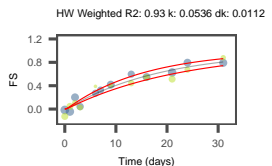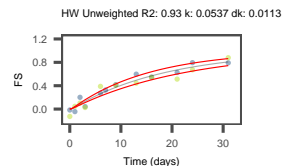

## C560

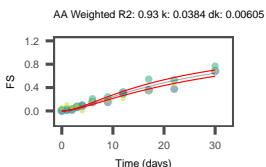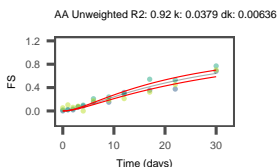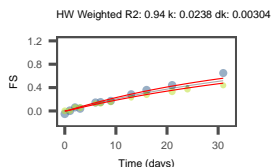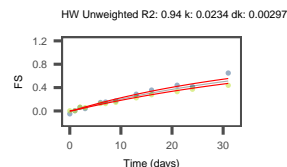

## CACP

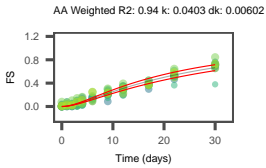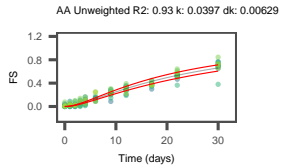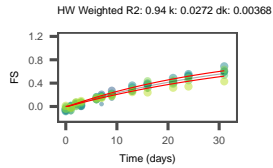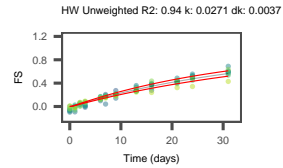

## CAD13

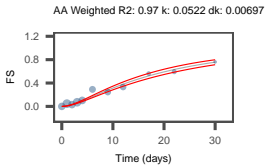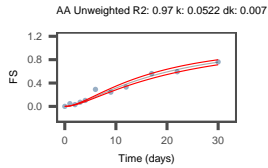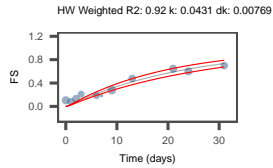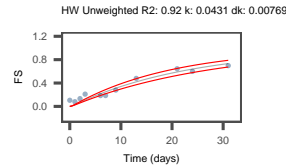

## CADH2

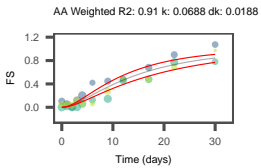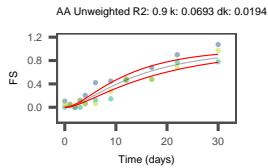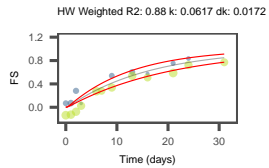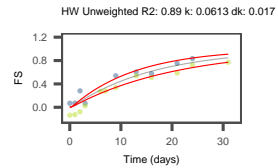

## CALR

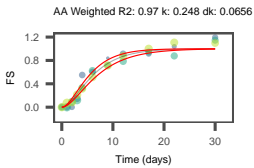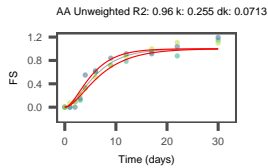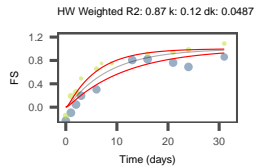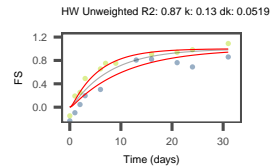

## CAND2

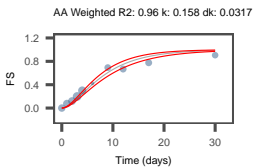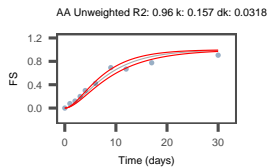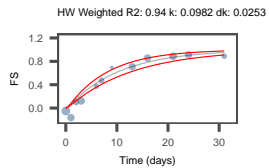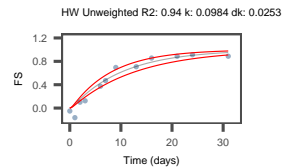

## CASQ2

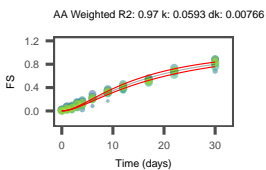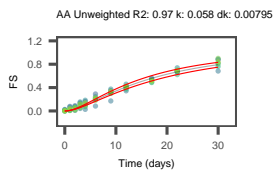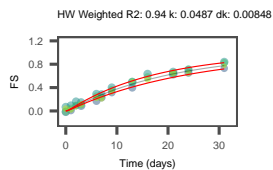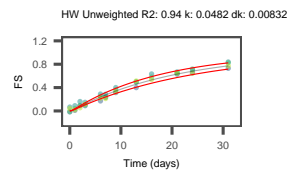



## CATD

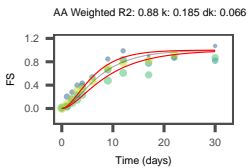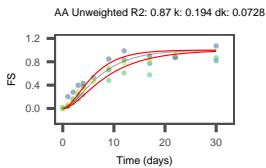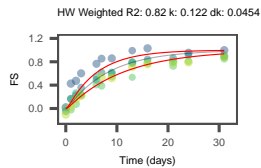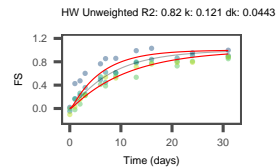

## CAV1

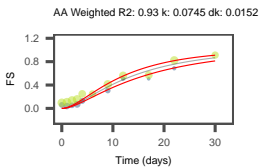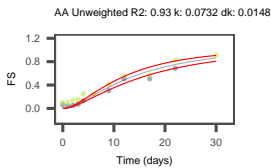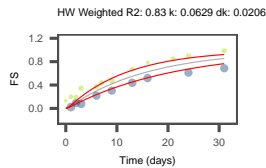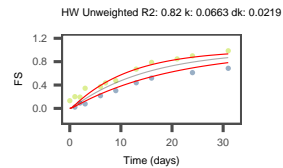

## CAVN1

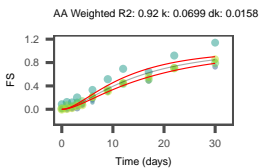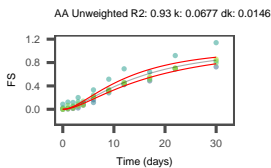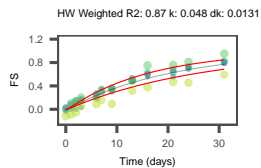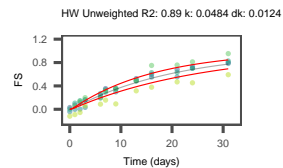

## CAVN2

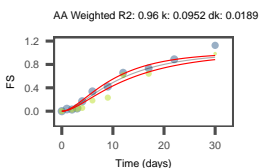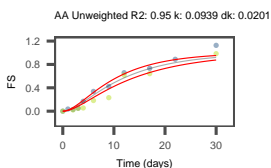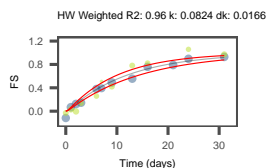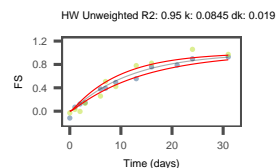

## CAVN4

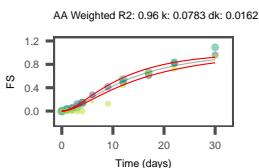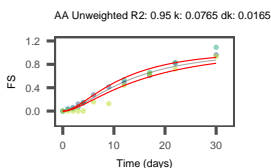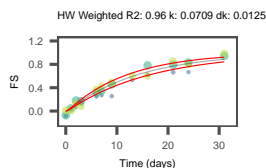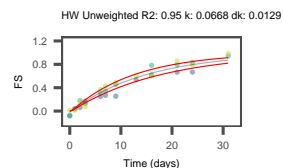

## CAZA2

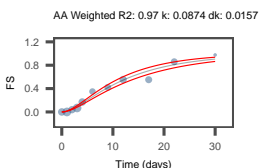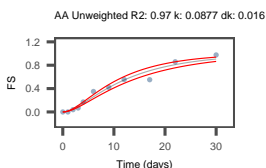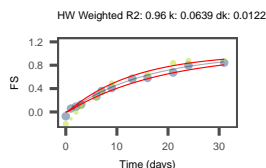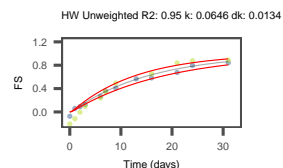

CD36

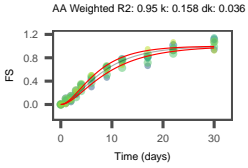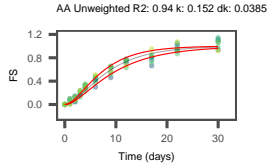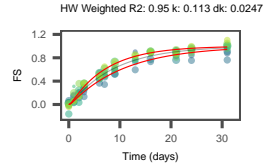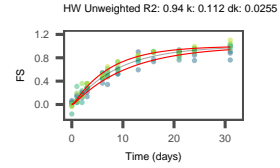

CH10

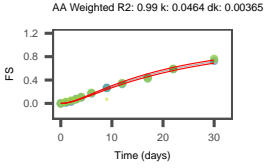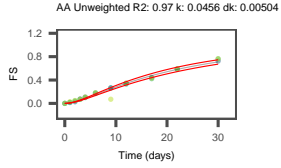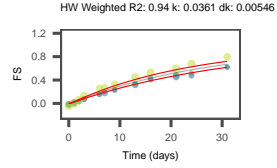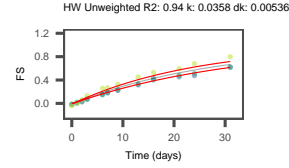

CH60

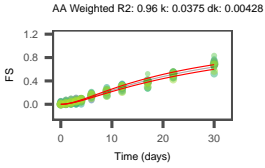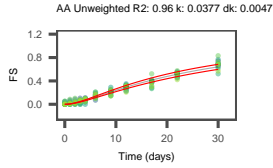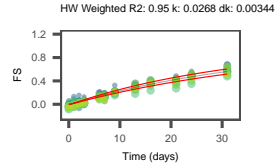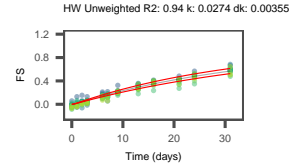

CISD1

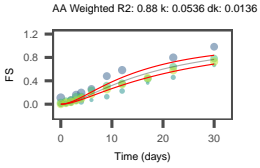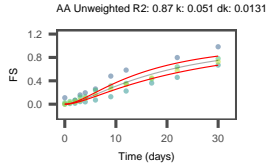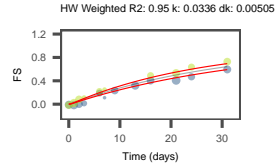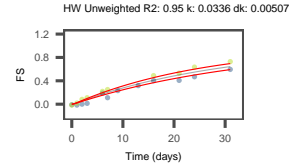

CISY

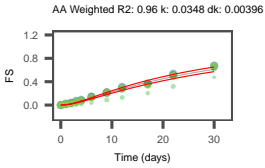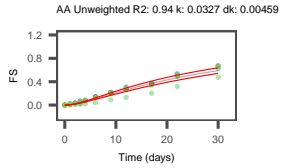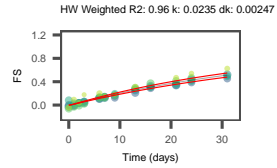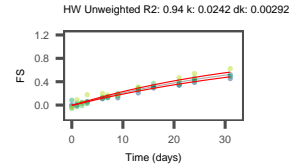

CLH1

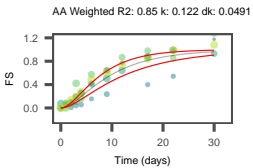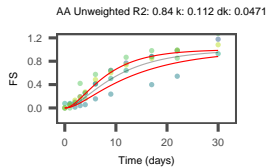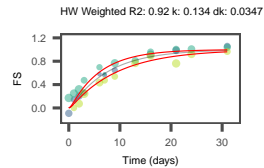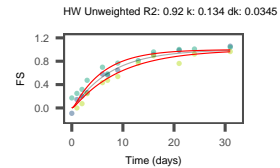

CLYBL

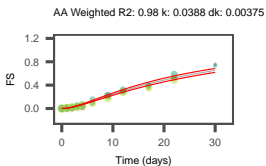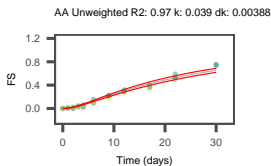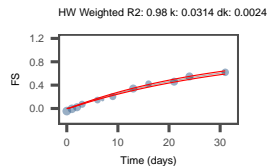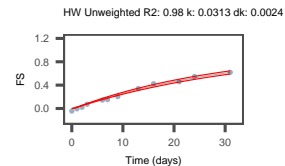

CMC1

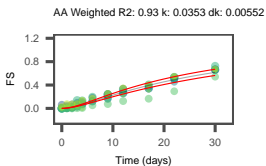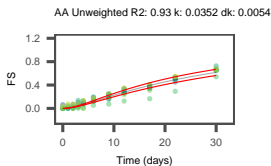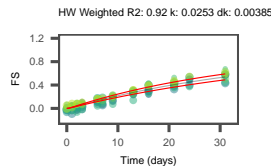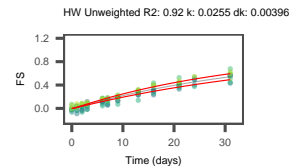

CMC2

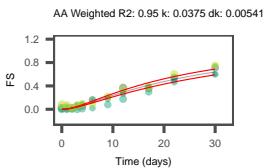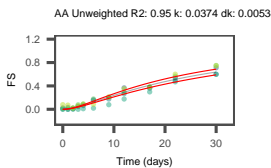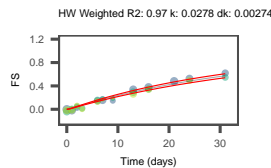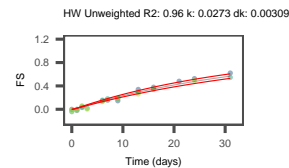

COF1

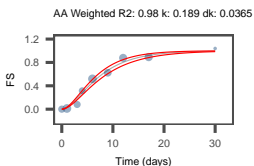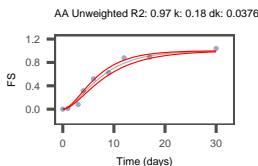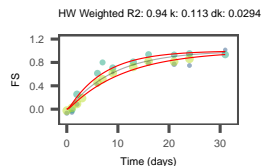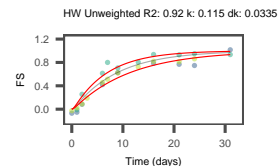

COF2

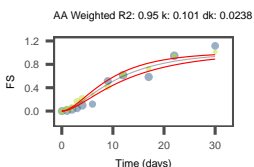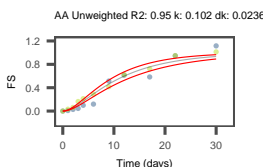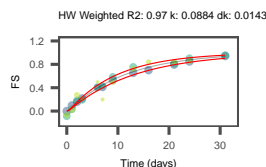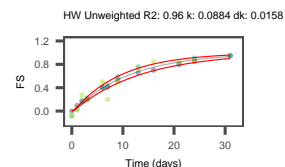

COMT

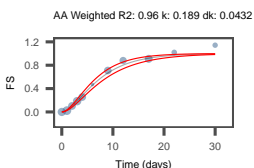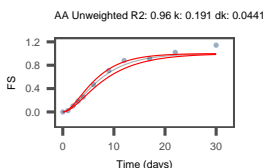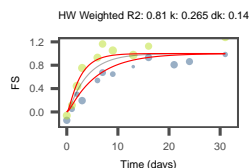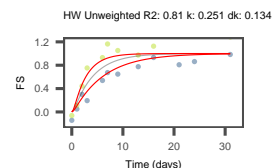

## COQ5

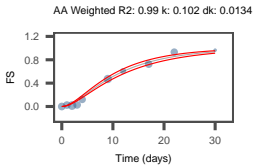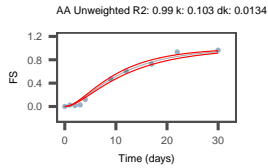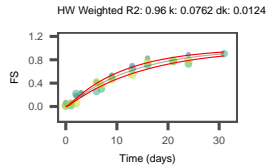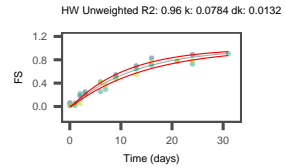

## COQ6

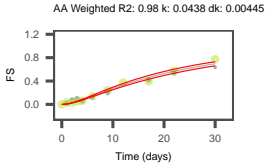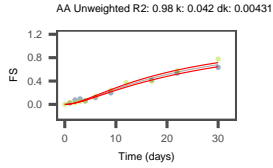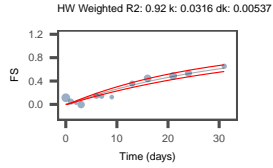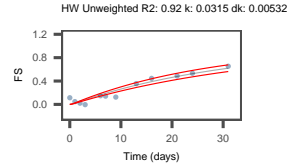

## COQ8A

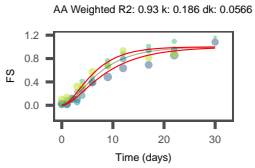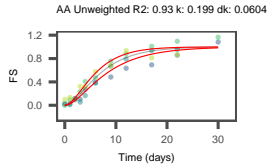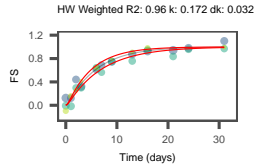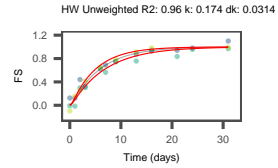

## COQ9

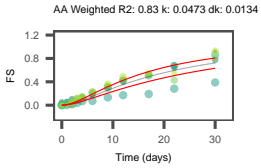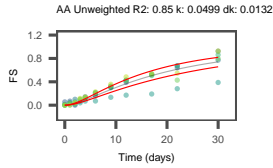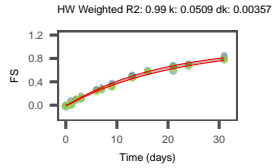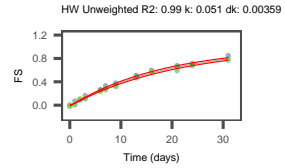

## COX1

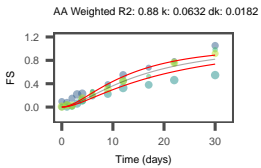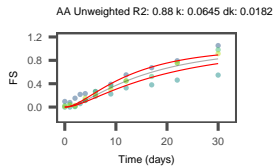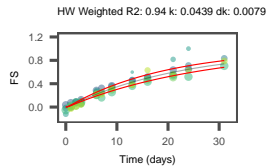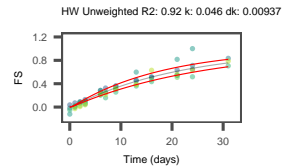

## COX17

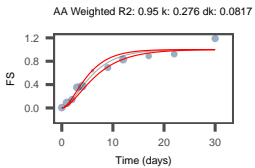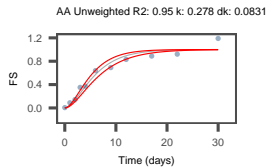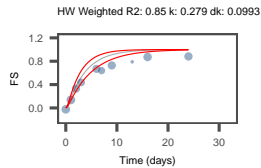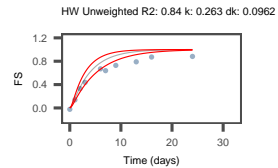

## COX2

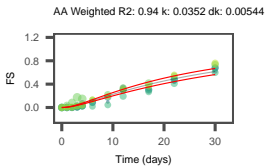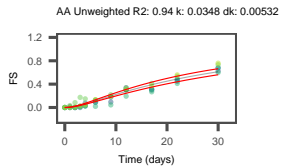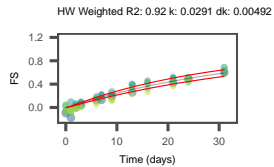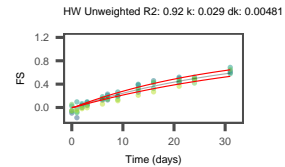

## COX3

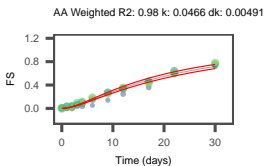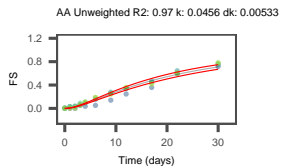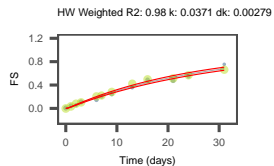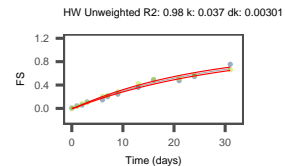

## COX41

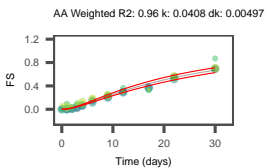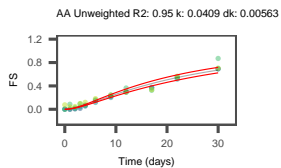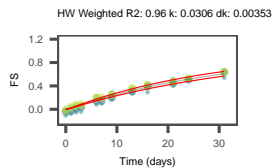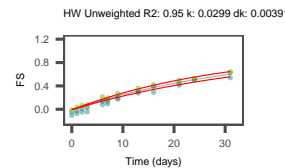

## COX5A

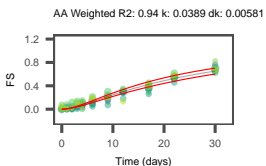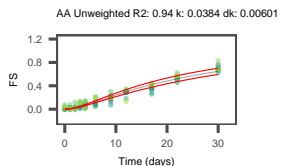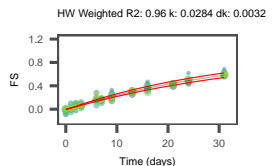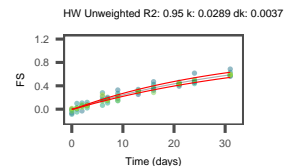

## COX5B

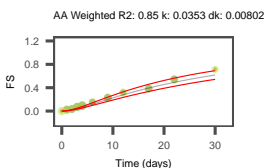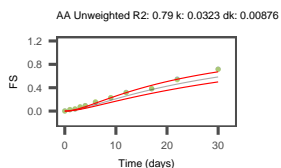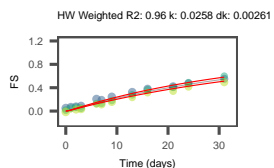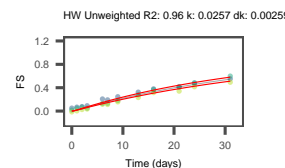

## COX6C

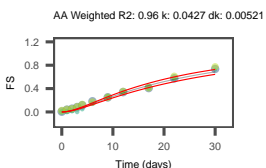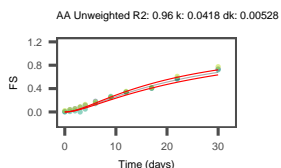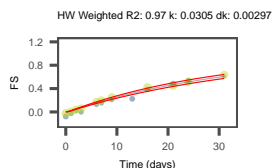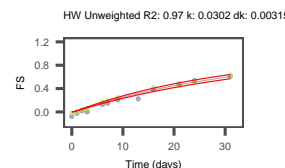

## CPT1B

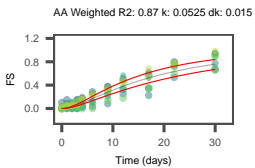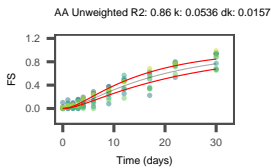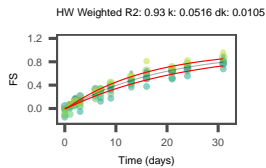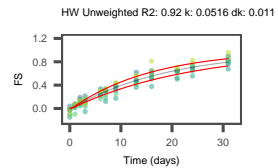

## CPT2

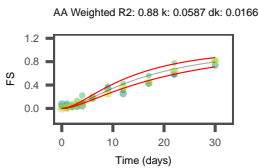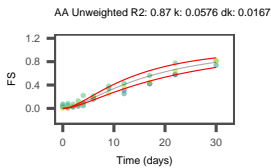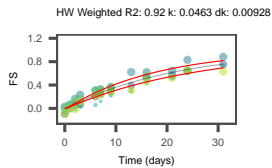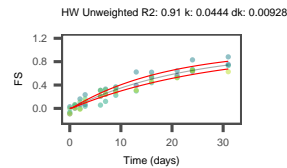

## CRIP2

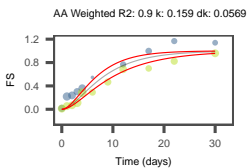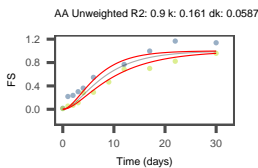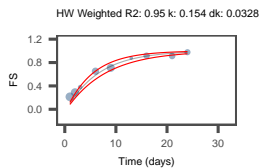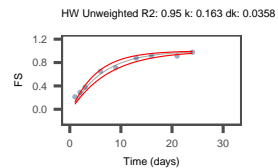

## CRYAB

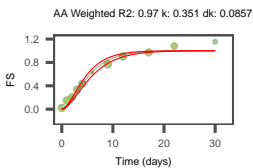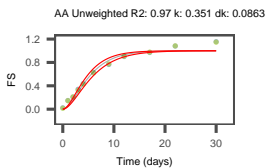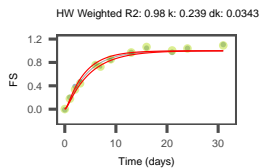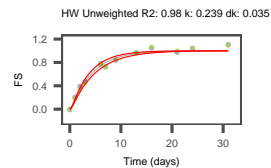

## CSRP1

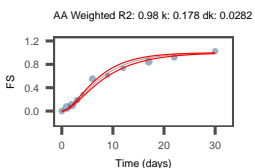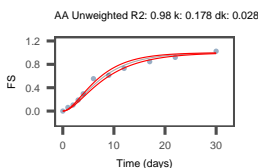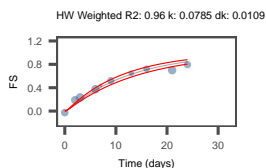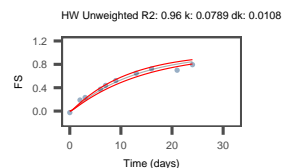

## CSRP3

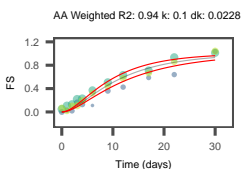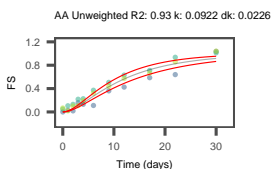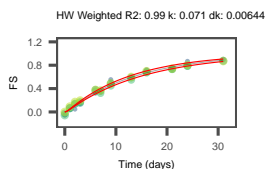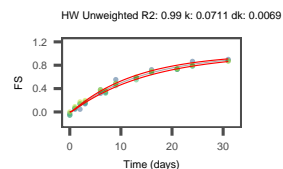

## CTNA1

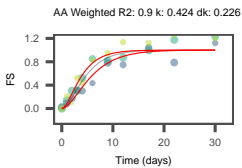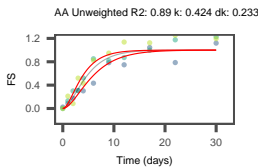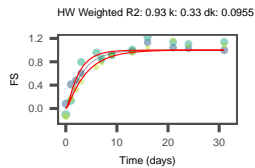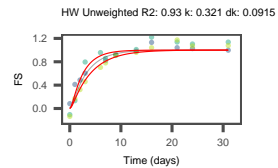

## CX6B1

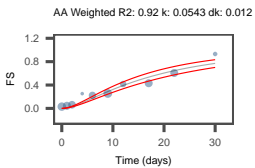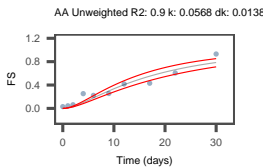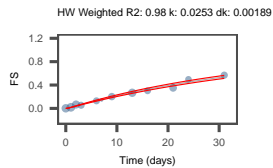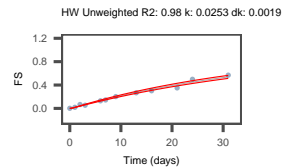

## CX7A2

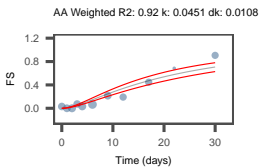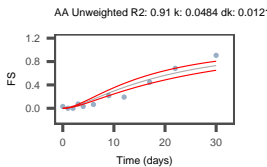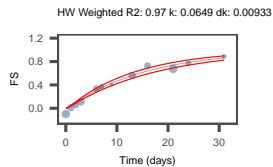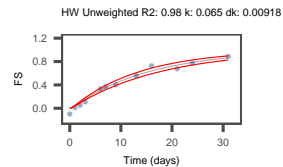

## CY1

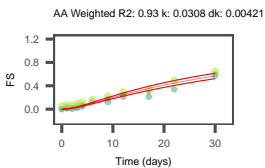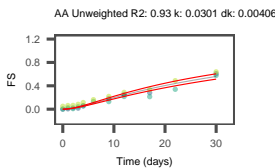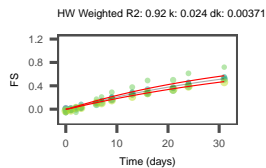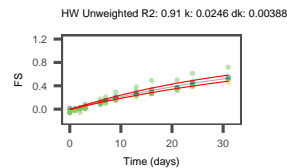

## D39U1

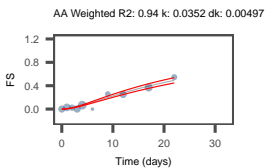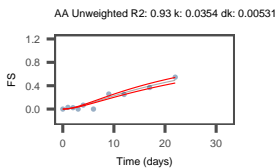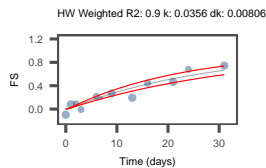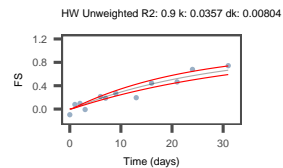

## DECR

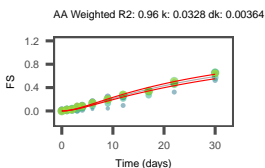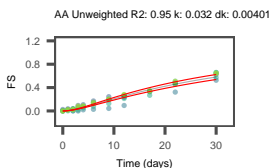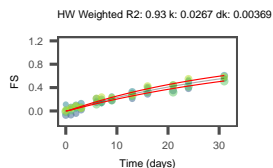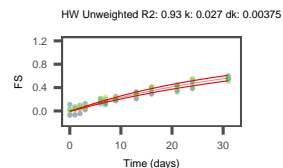

DESM

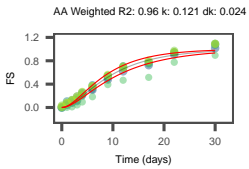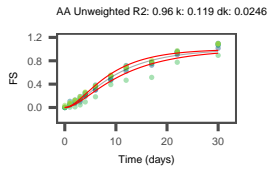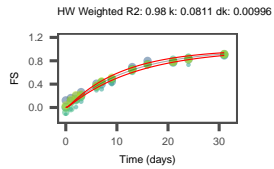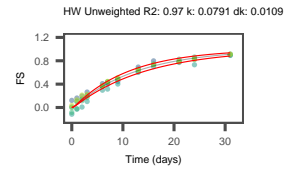

DESP

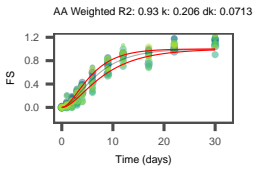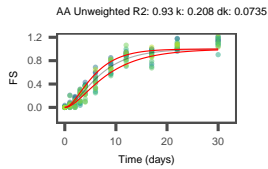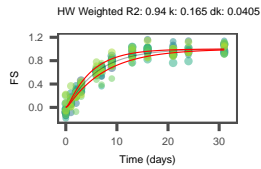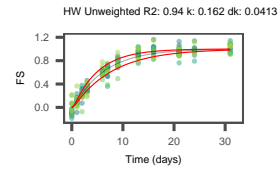

DEST

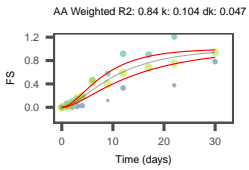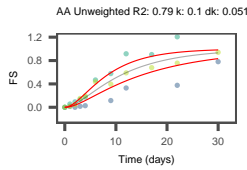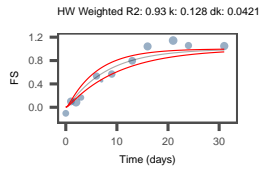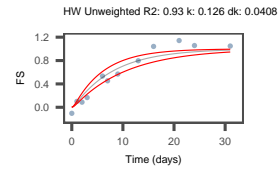

DHB4

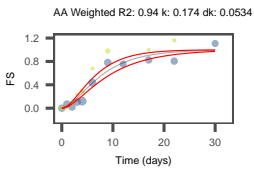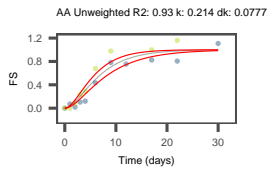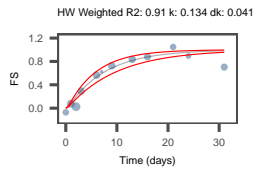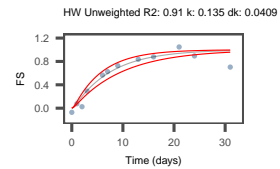

DHPR

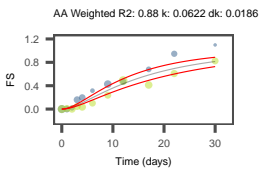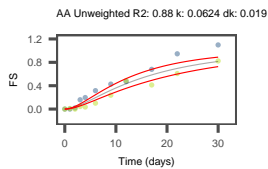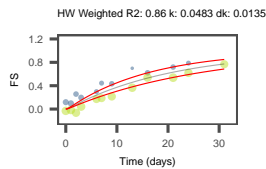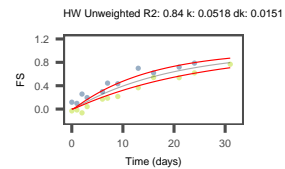

DHRS4

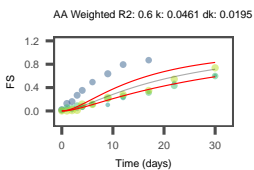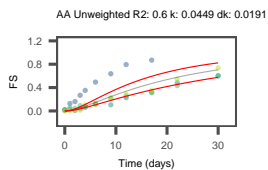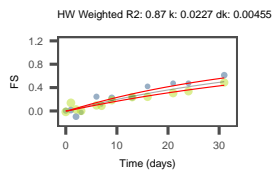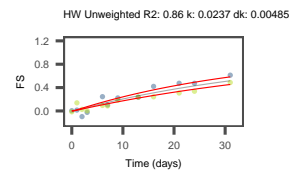



## DLDH

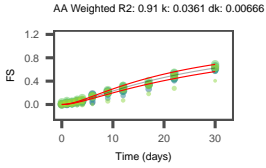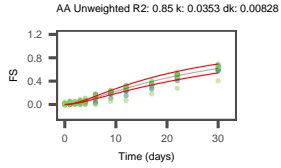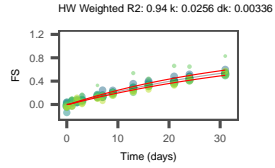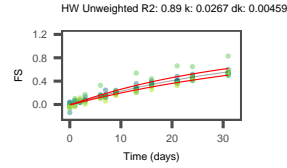

## DMD

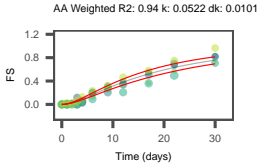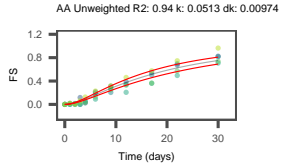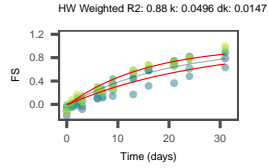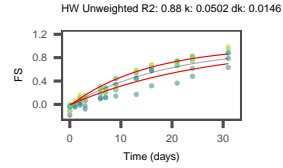

## DNJA2

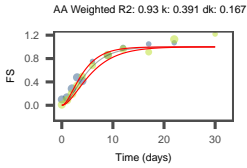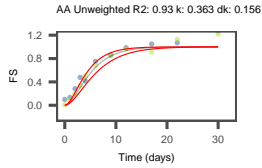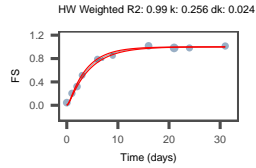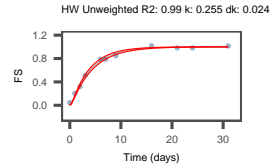

## DNM1L

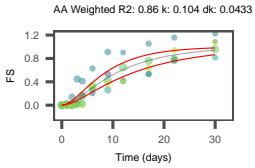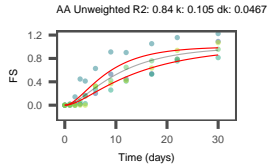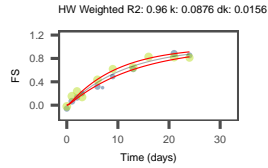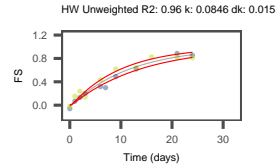

## DRS7C

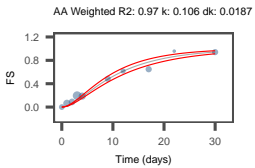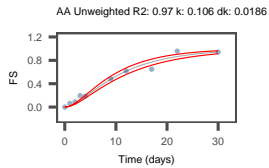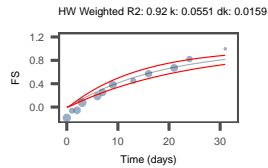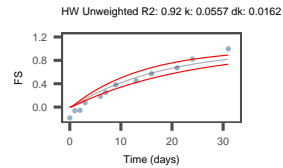

## DYHC1

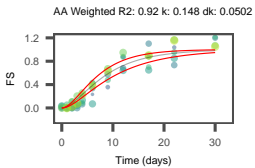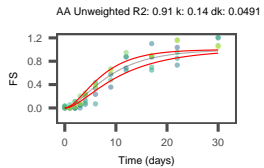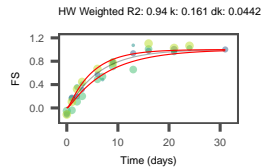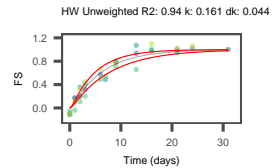

## ECH1

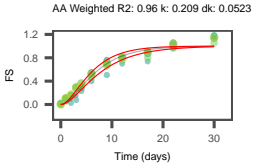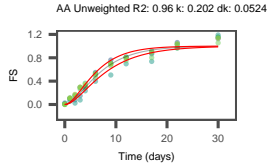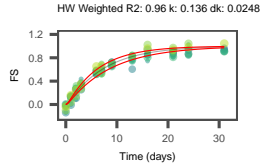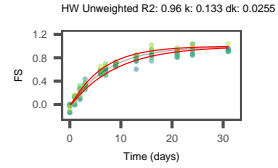

## ECH2

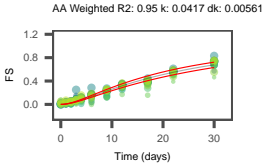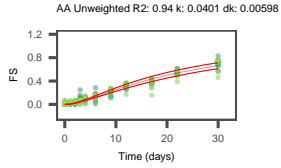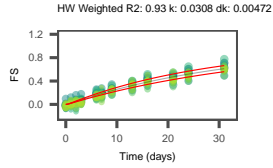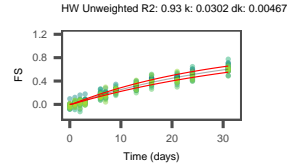

## ECH3

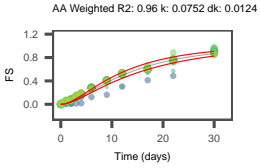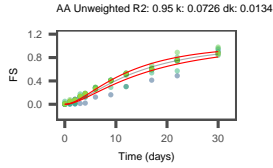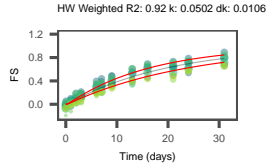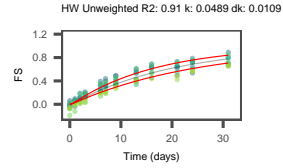

## ECH4

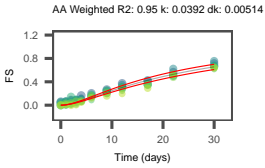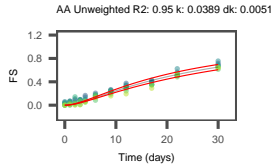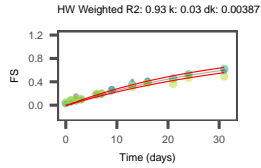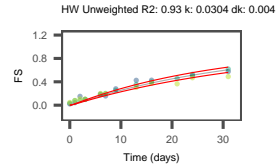

## ECH5

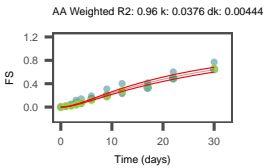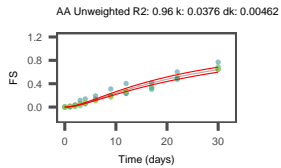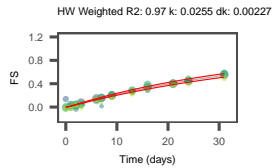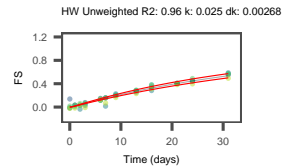

## ECH6

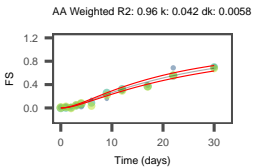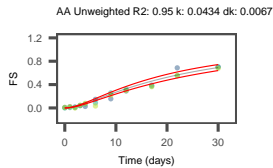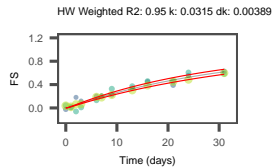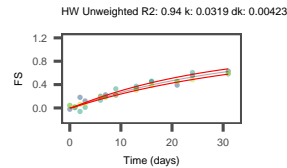

## EF1A1

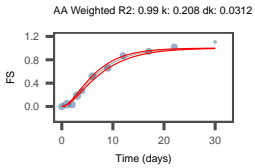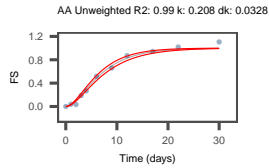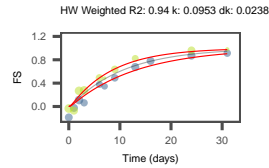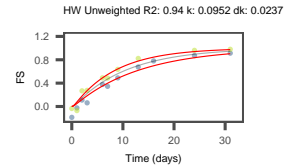

## EF1A2

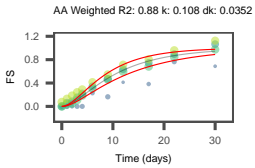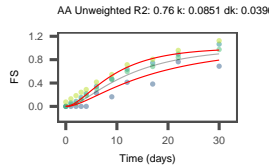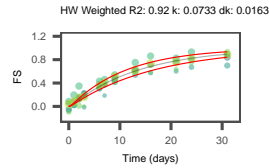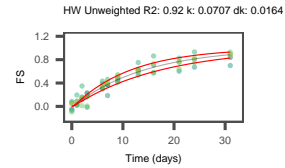

## EF1G

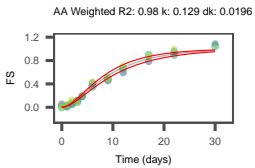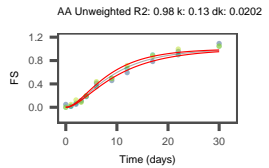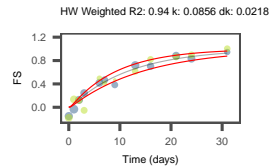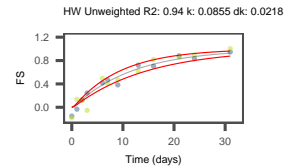

## EF2

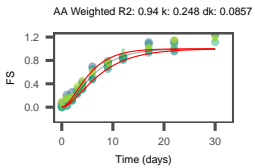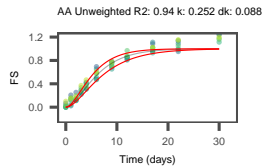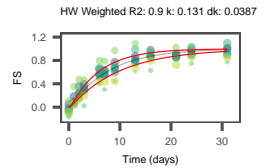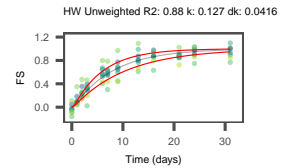

## EFTU

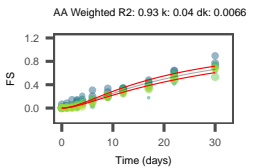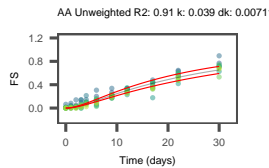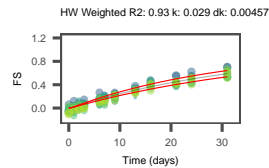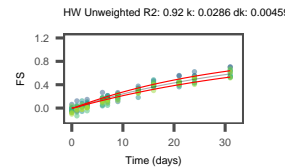

## EHD2

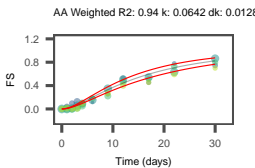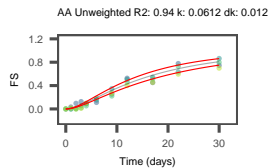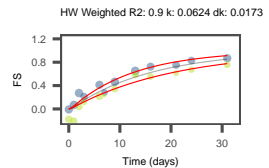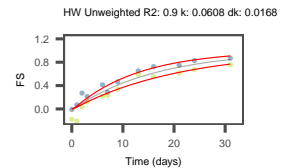

## EHD4

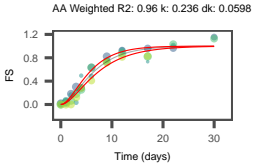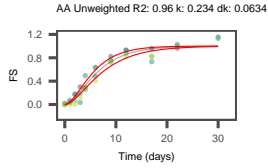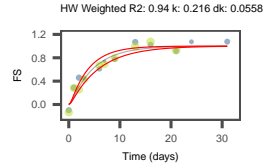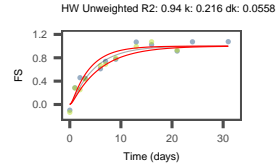

## ENOA

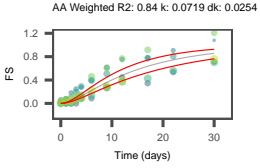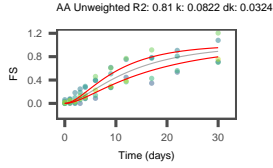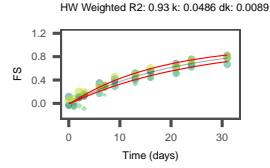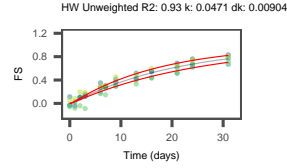

## ENOB

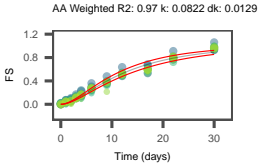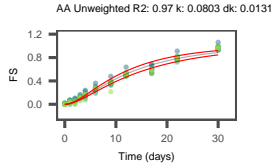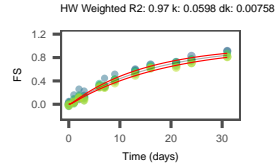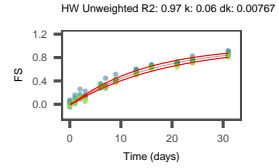

## ENPL

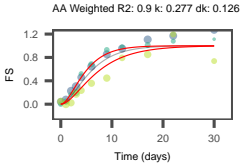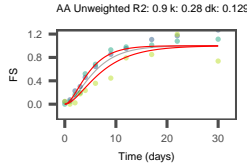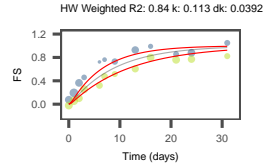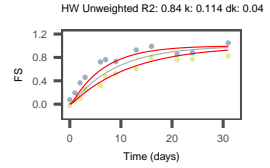

## EST1D

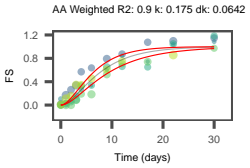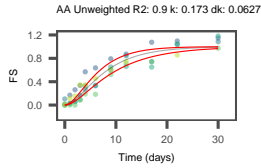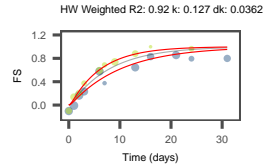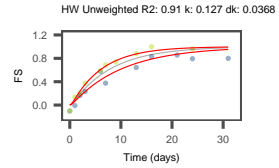

## ETFA

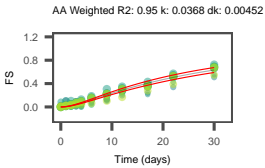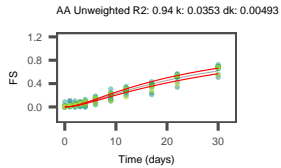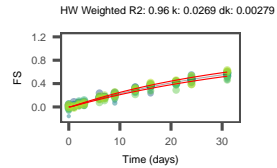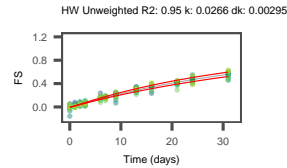

## ETFB

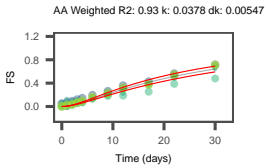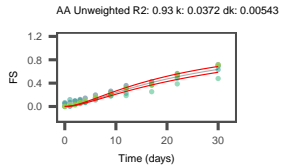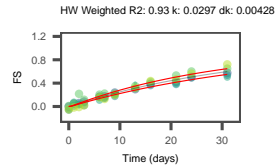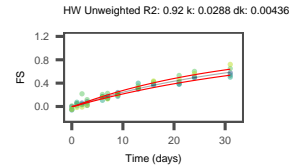

## ETFD

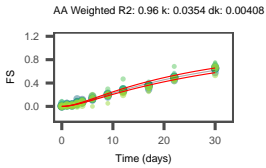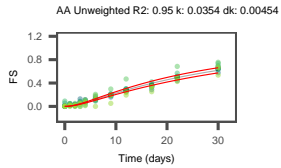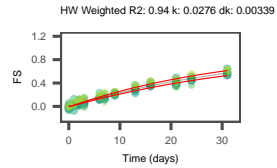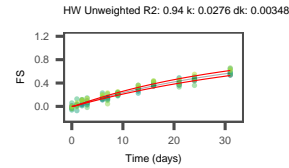

## FABP4

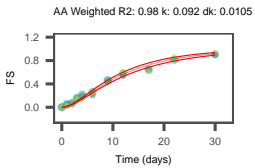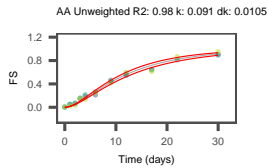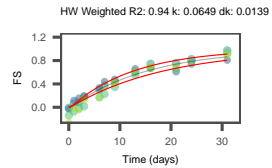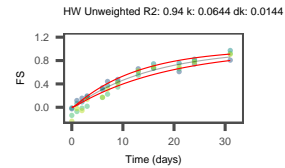

## FERM2

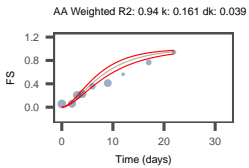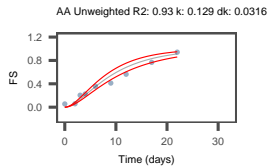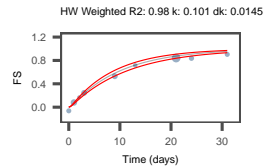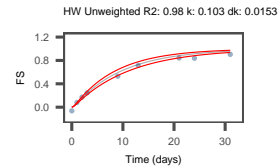

## FHL1

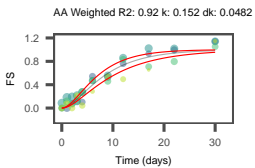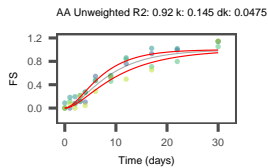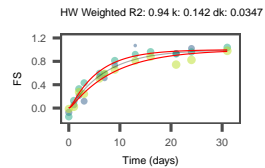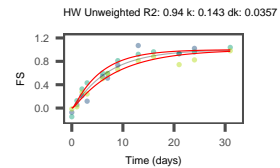

## FHL2

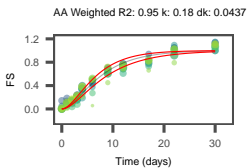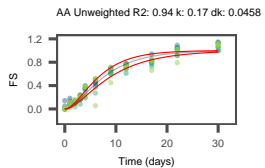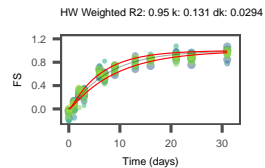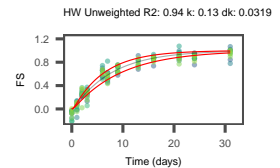

## FIBA

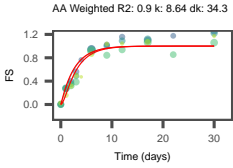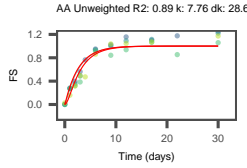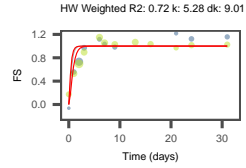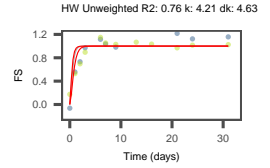

## FIBB

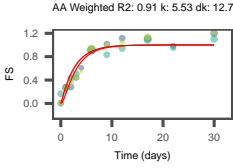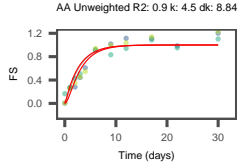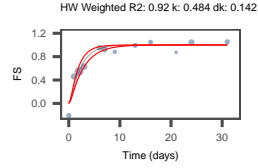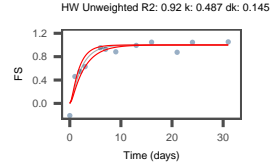

## FIS1

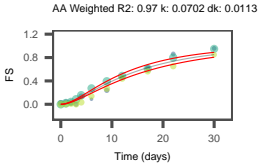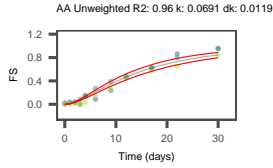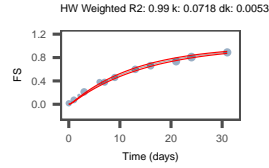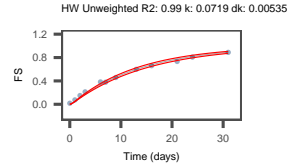

## FKBP3

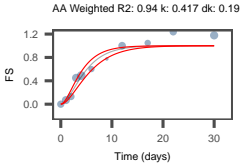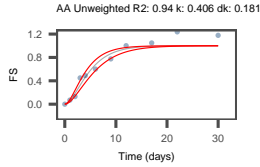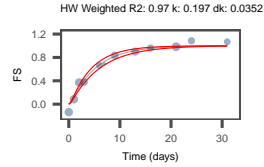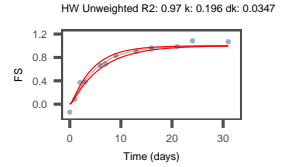

## FLNC

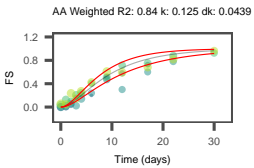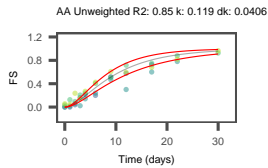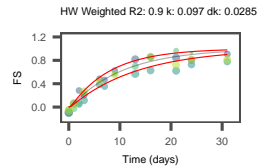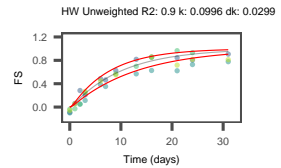

## FMO1

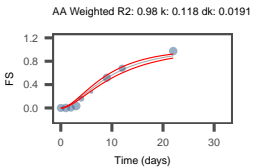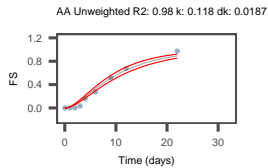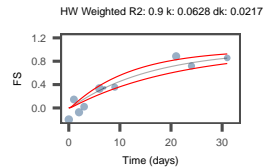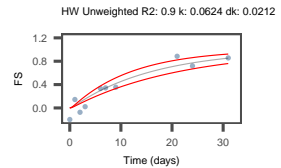

FRIH

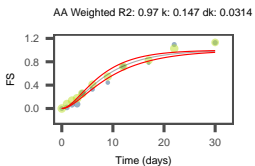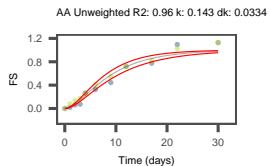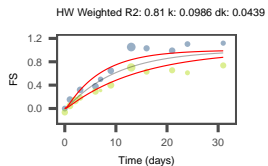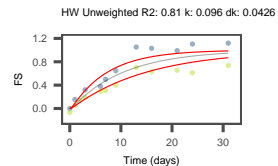

FUMH

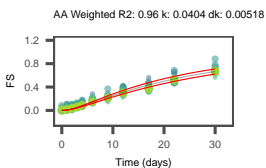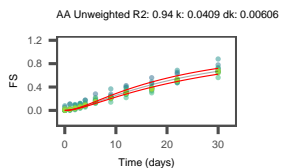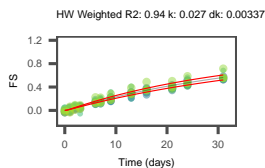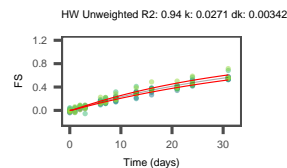

G3P

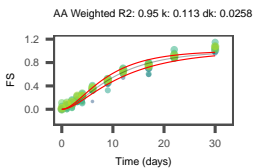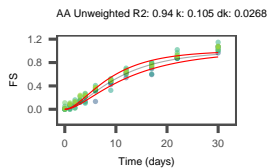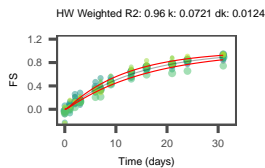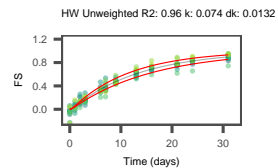

G6PI

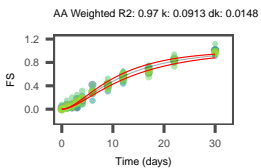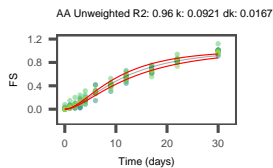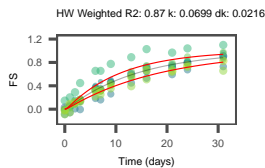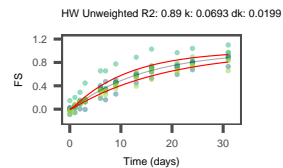

GAL3A

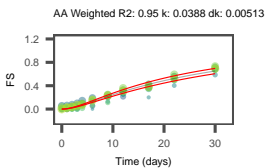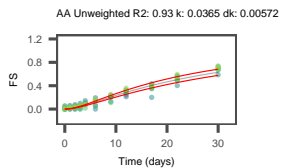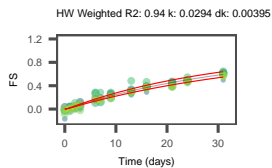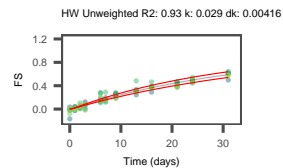

GBB1

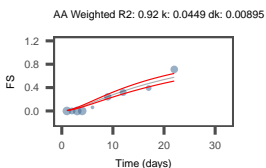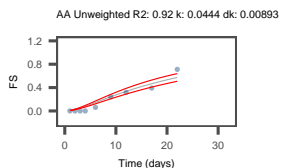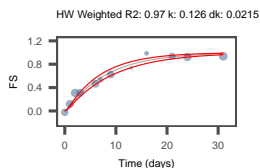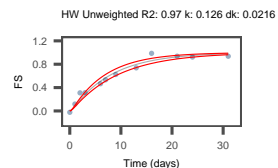

## GBB2

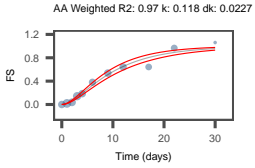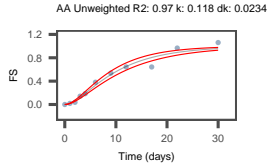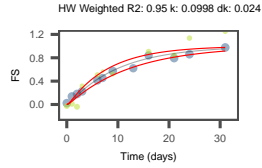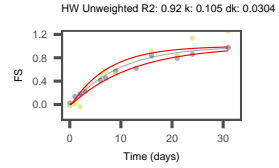

## GCDH

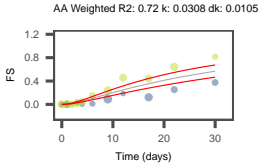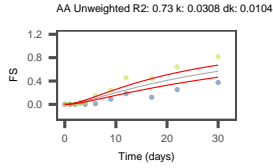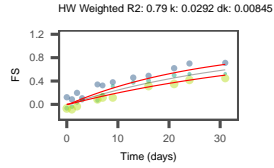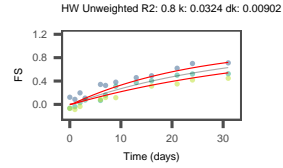

## GDIA

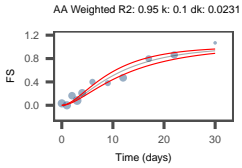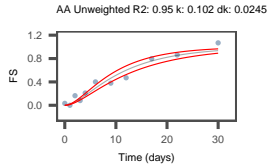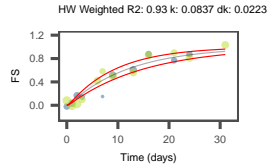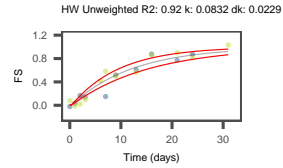

## GDIB

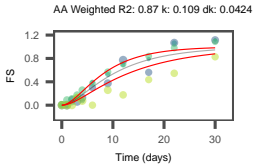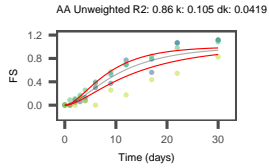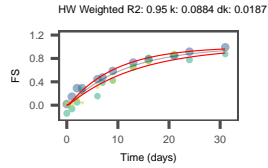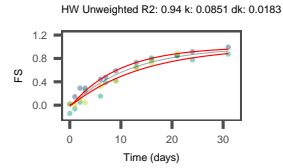

## GLOD4

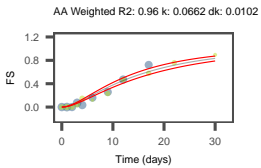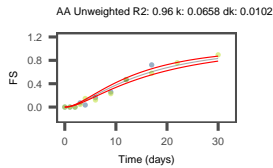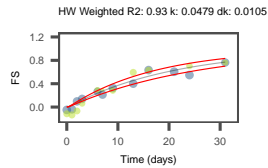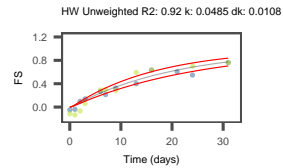

## GLRX5

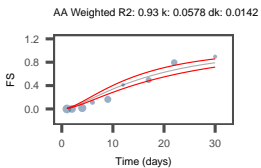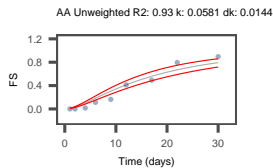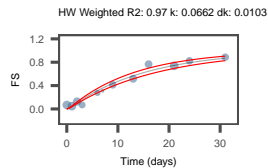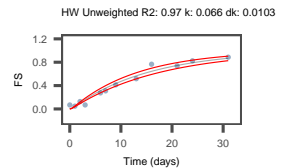



GLYG

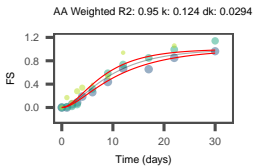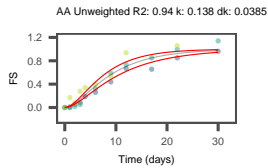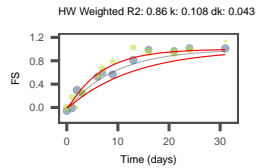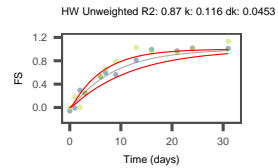

GRP75

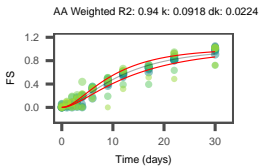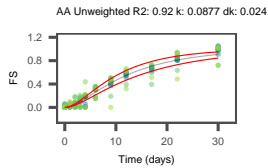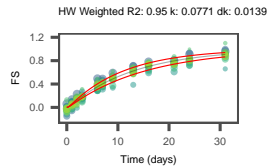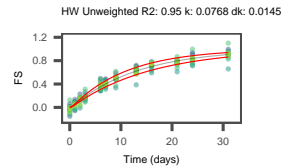

GRPE1

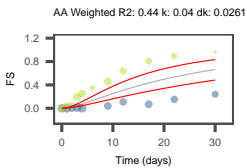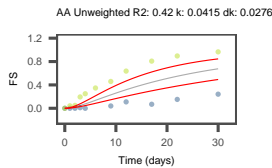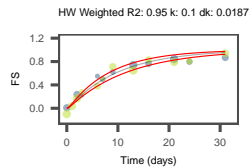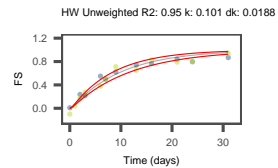

GSTA4

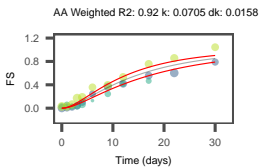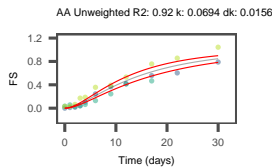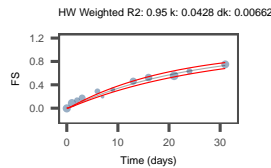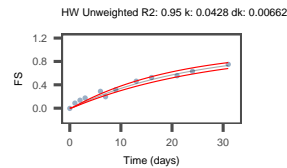

GSTK1

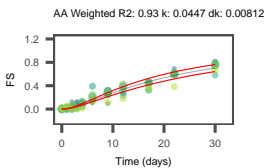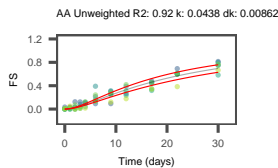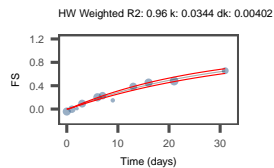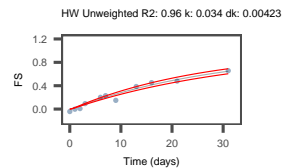

GSTM1

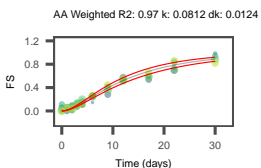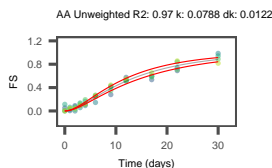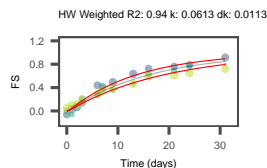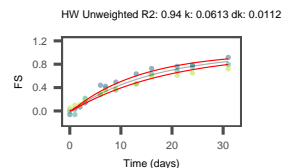

**GSTM2**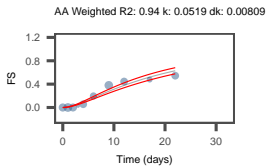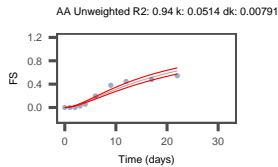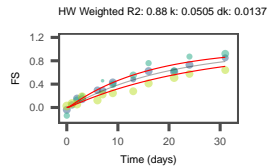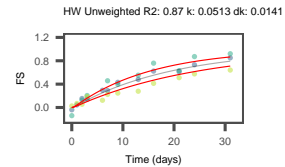**GSTO1**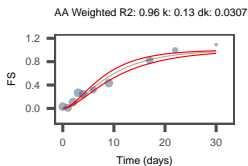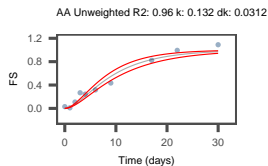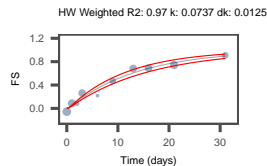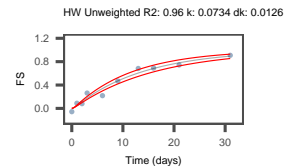**HBA**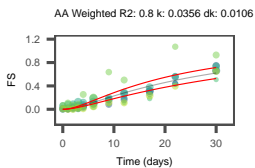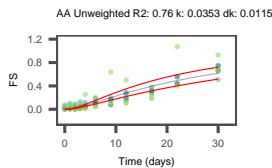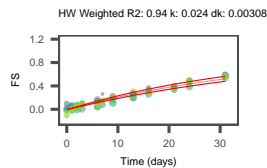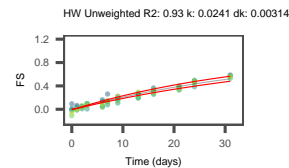**HBB1**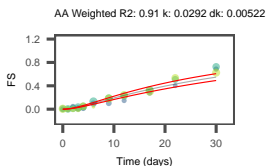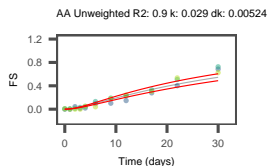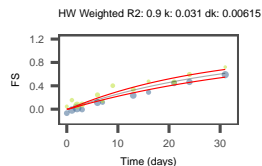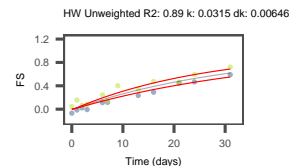**HCD2**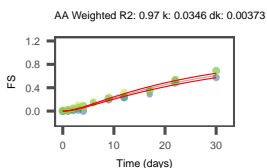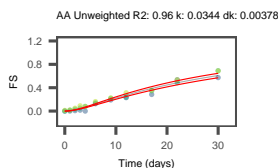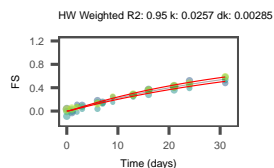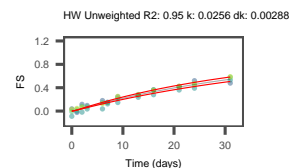**HCDH**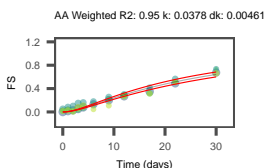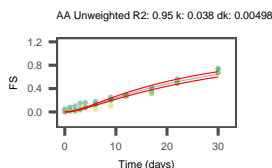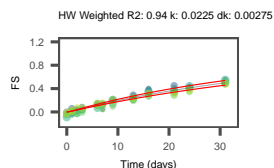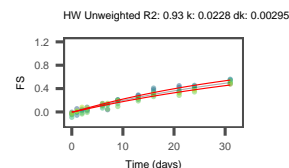

## HDHD2

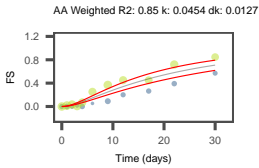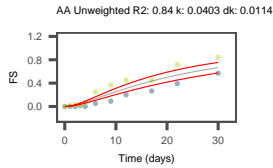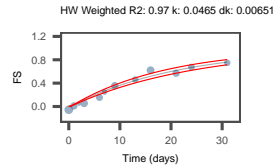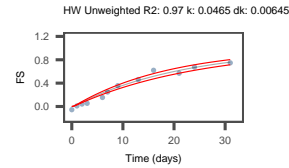

## HEM2

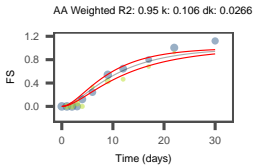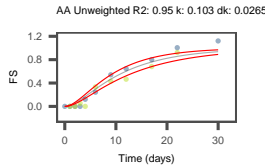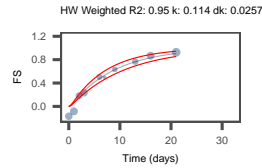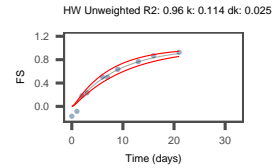

## HEMO

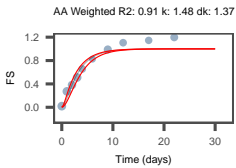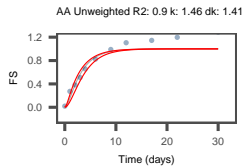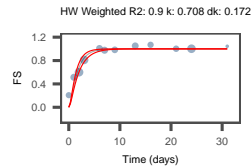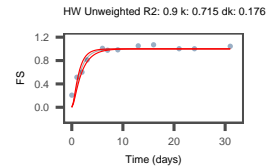

## HHATL

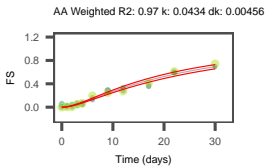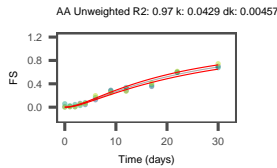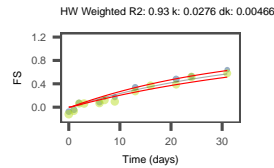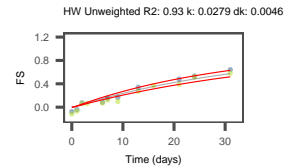

## HIBCH

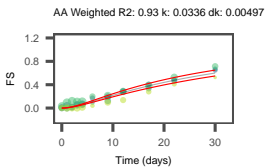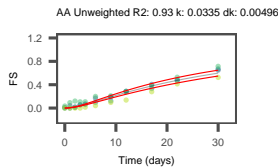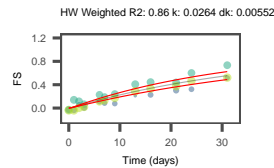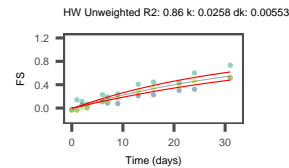

## HINT1

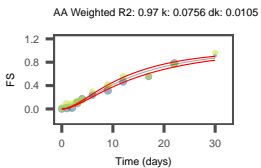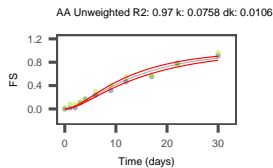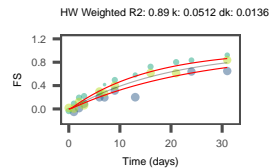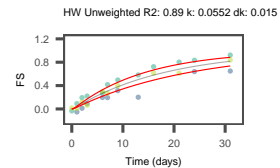

## HINT2

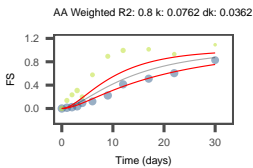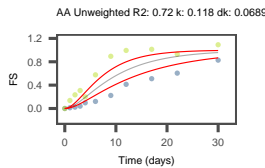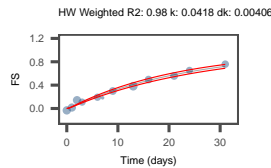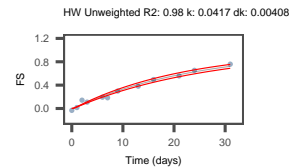

## HNRPK

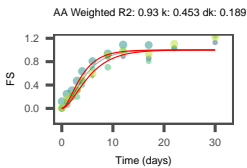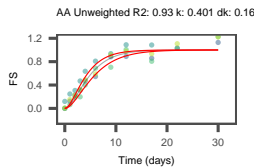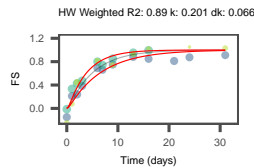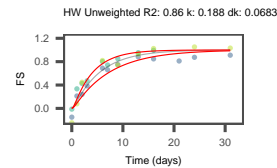

## HNRPU

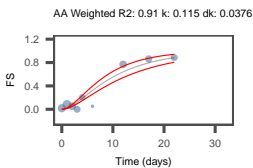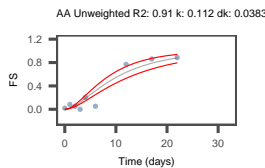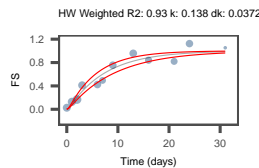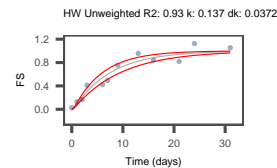

## HS90A

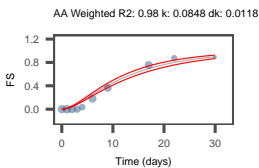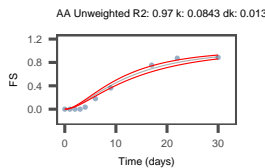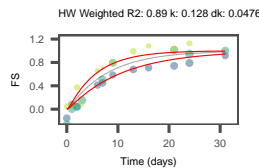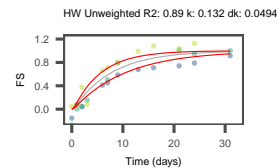

## HS90B

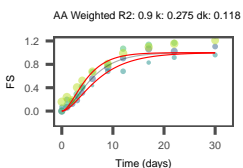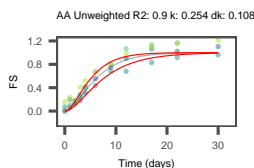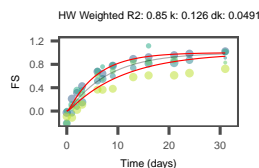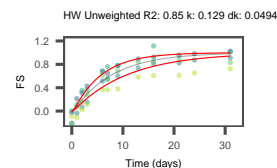

## HSDL2

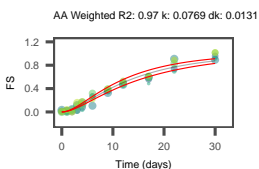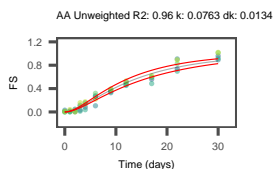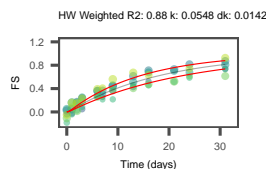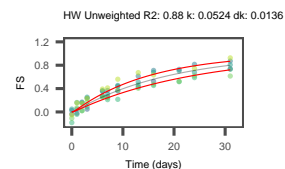

## HSP74

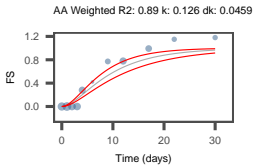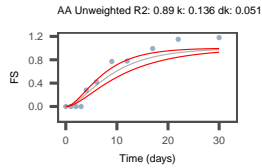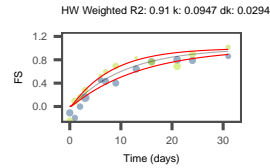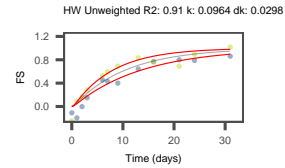

## HSP7C

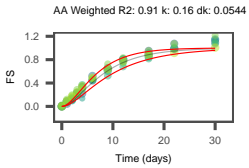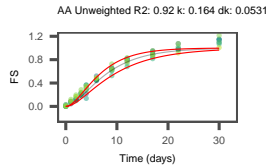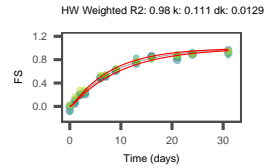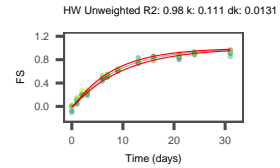

## HSPB1

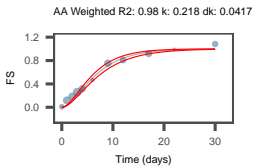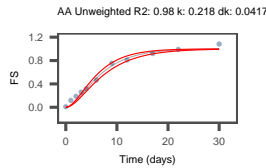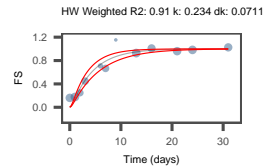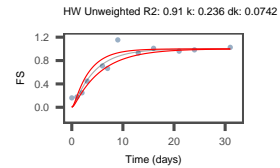

## HSPB6

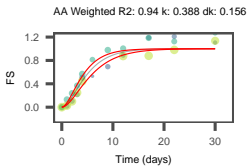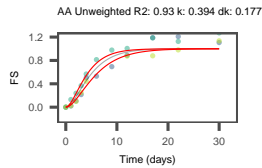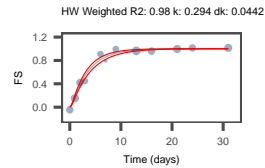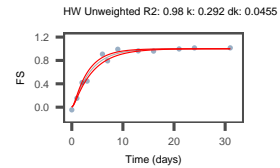

## HYES

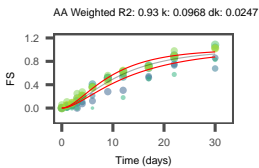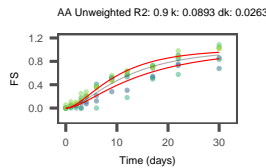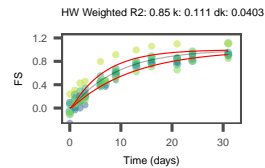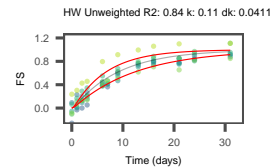

## IDH3A

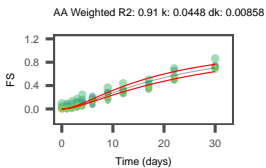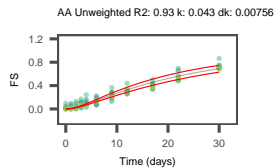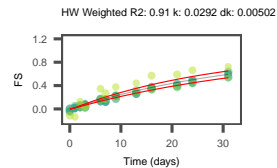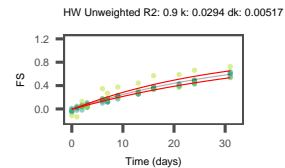

## IDHG1

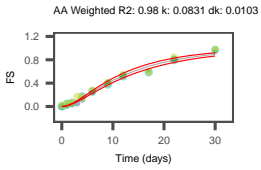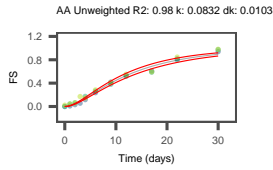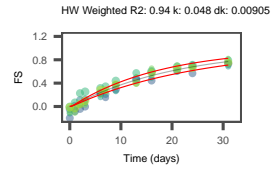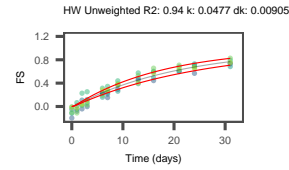

## IDHP

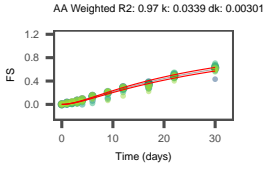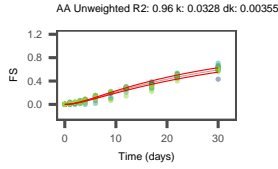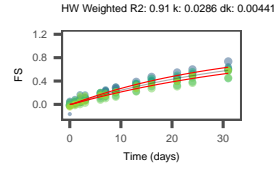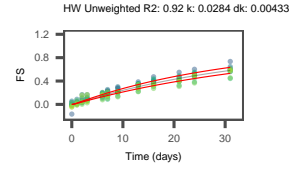

## IGHM

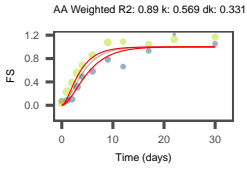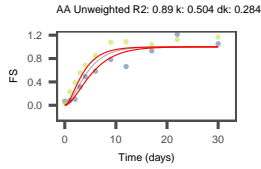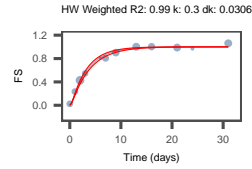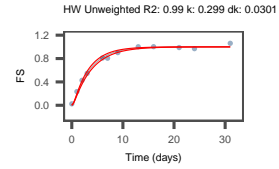

## IGKC

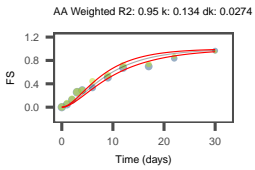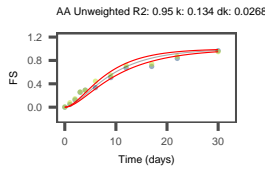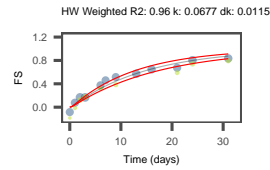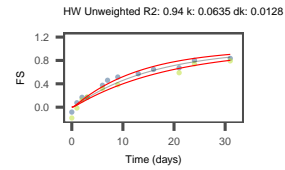

## IPYR

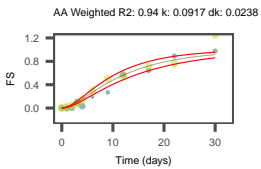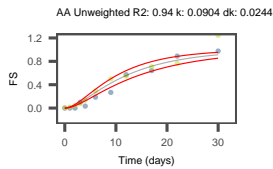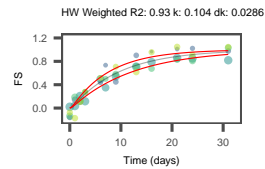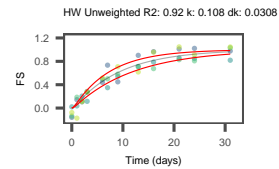

## IPYR2

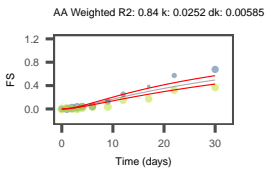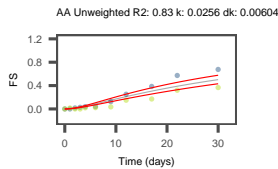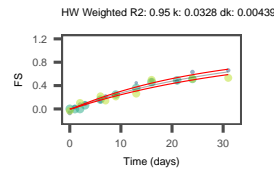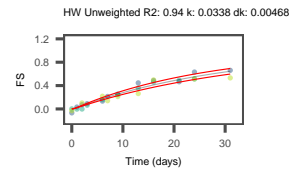

## ISC2A

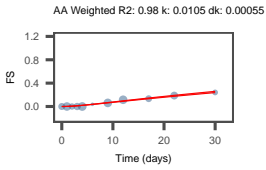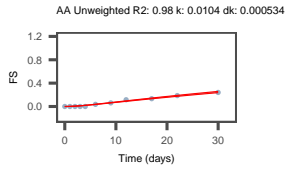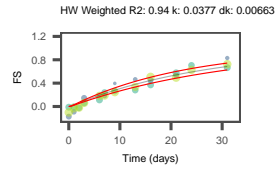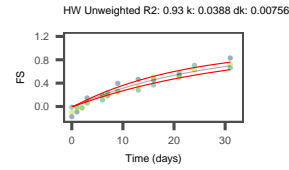

## ISOC1

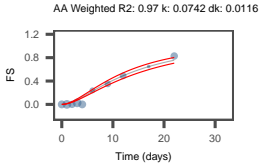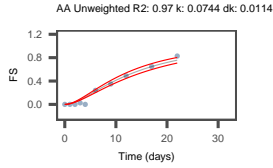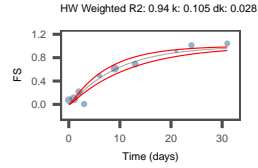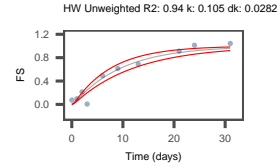

## IVD

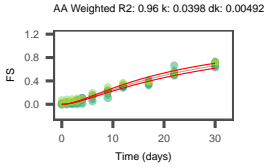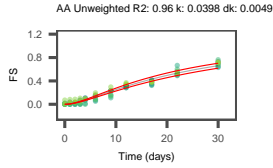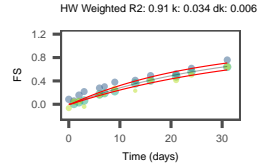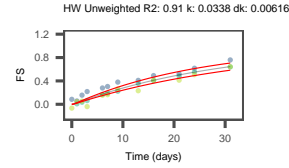

## KAD1

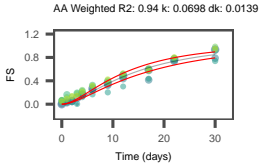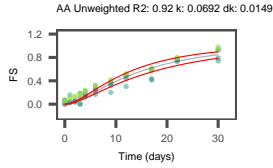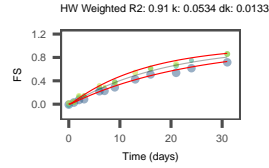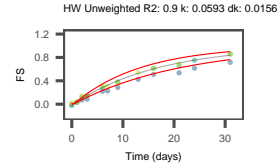

## KAD2

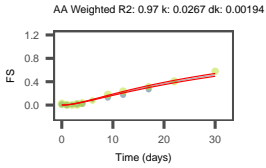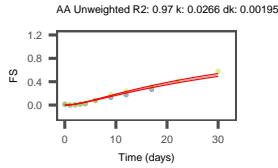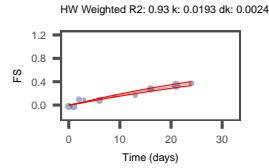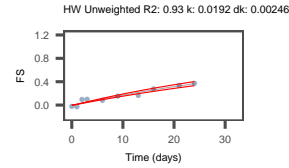

## KAP2

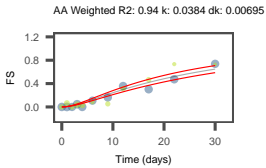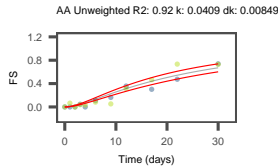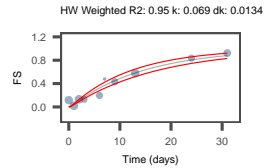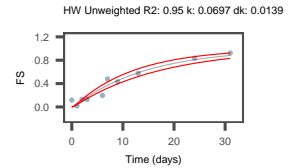

KCRB

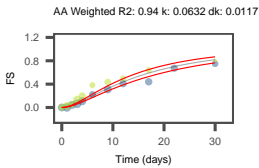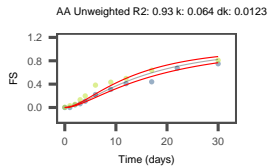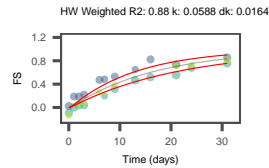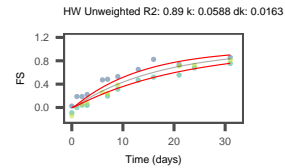

KCRM

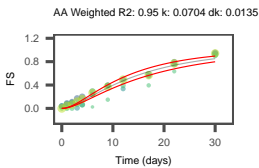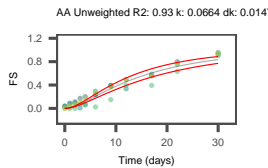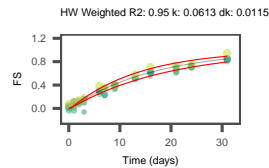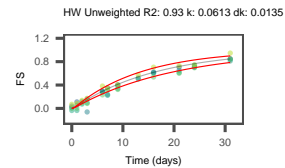

KCRS

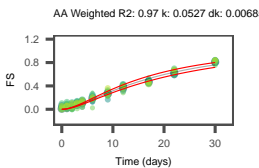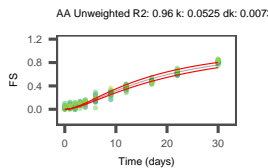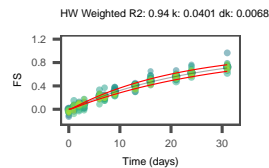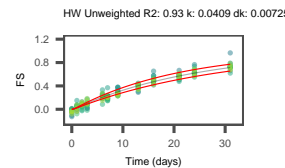

KPYM

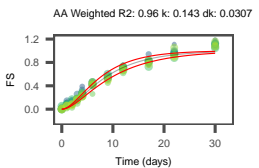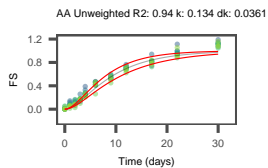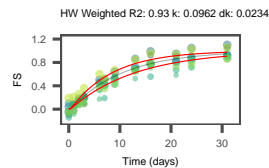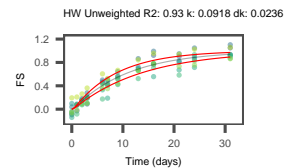

LAMB1

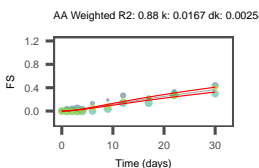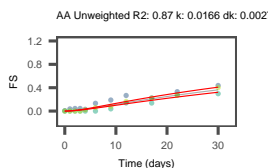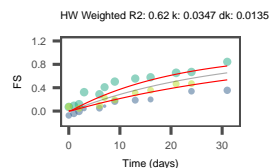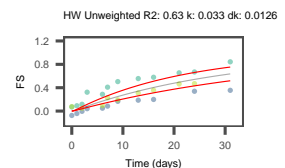

LAMC1

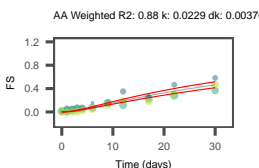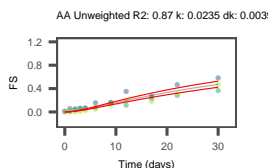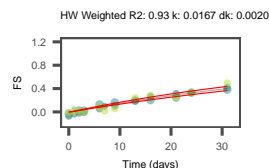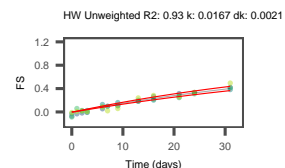



## LDB3

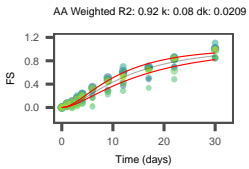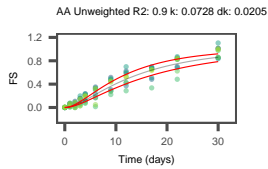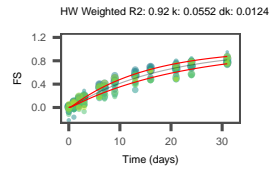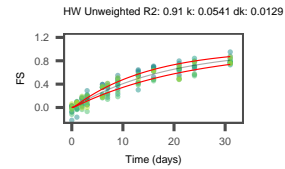

## LDHA

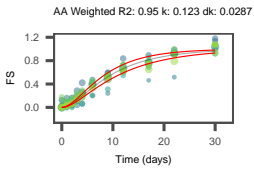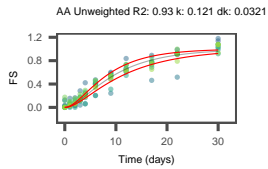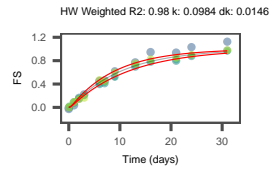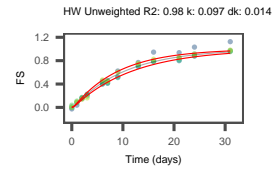

## LDHB

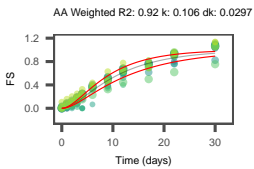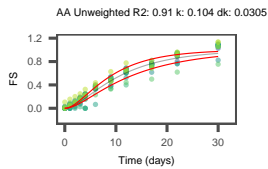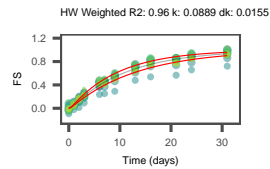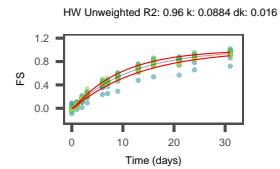

## LEG1

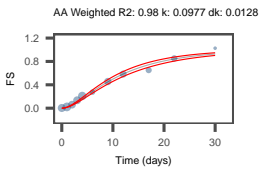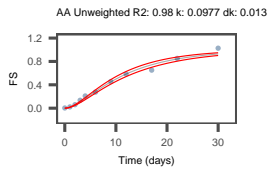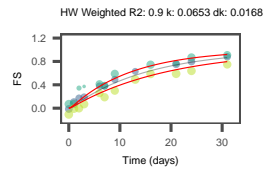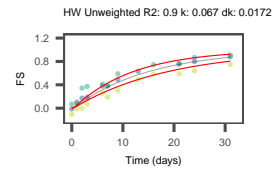

## LGUL

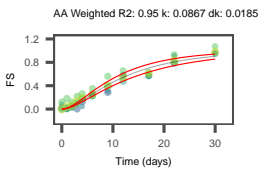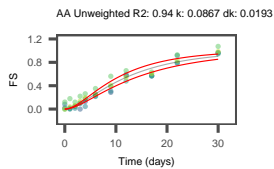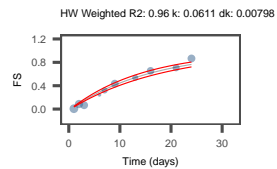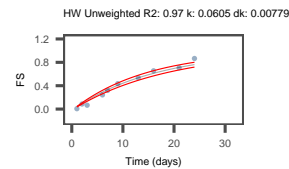

## LKHA4

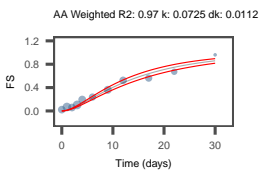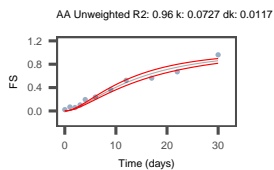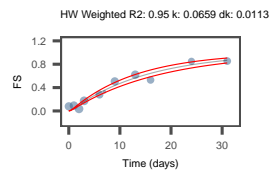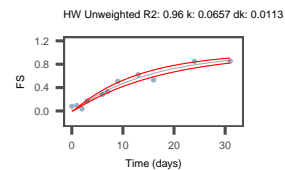

## LONM

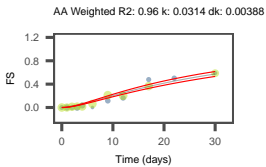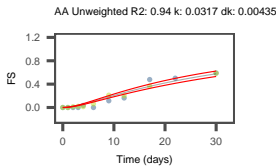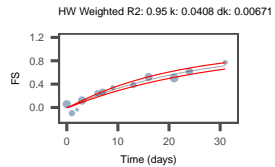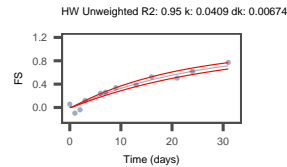

## LPPRC

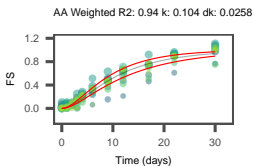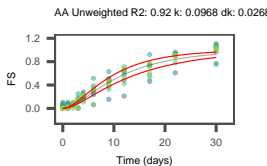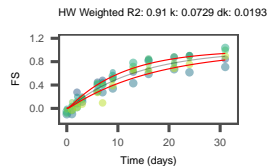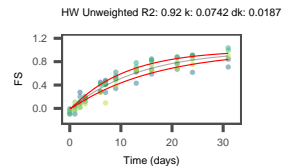

## LUM

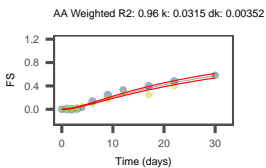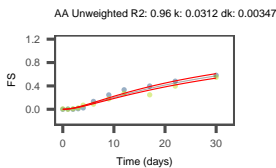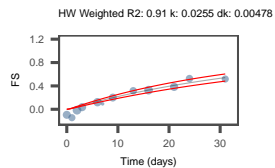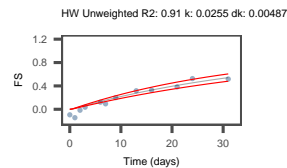

## M2OM

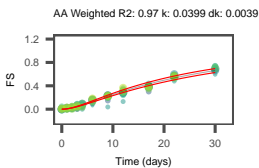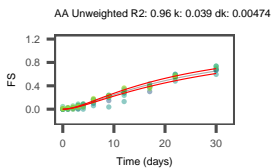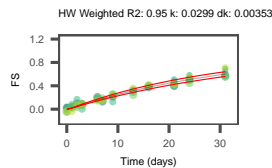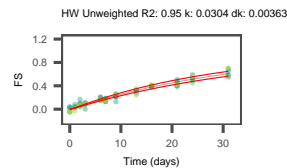

## MAAI

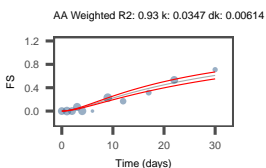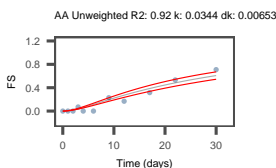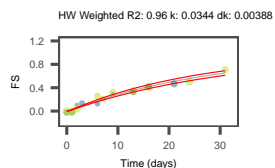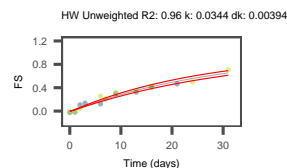

## MACD1

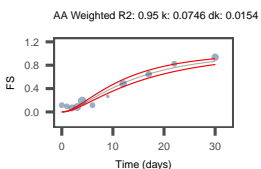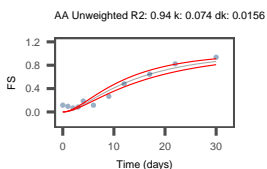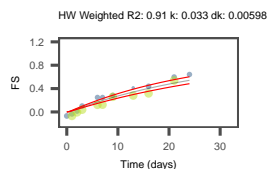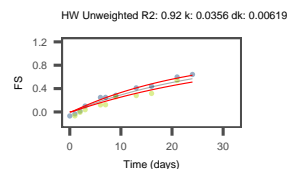

## MCAT

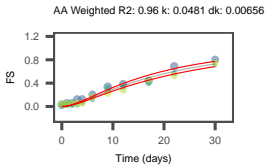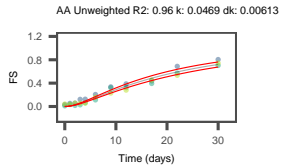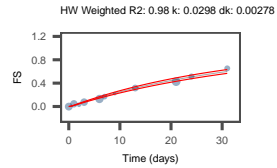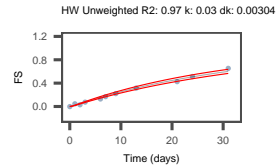

## MCCA

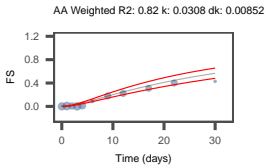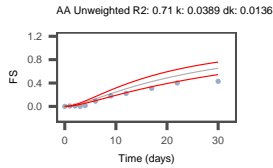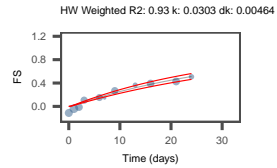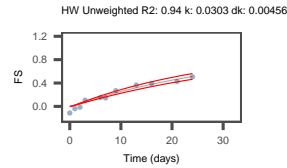

## MDHC

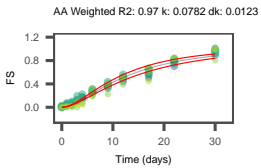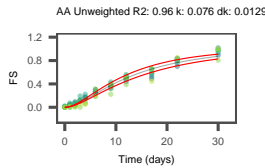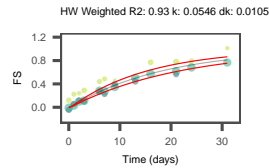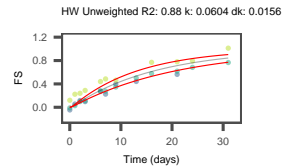

## MDHM

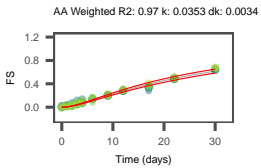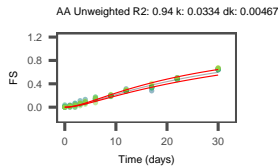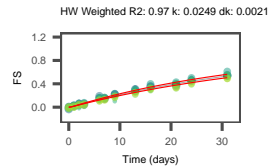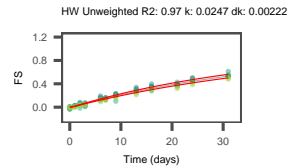

## MGDP1

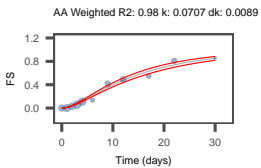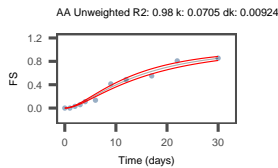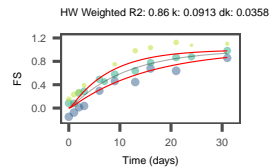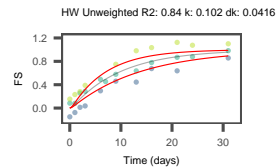

## MIC13

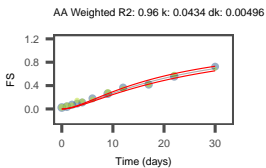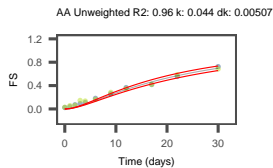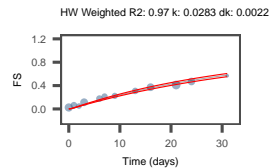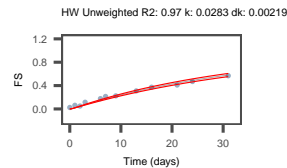

## MIC19

AA Weighted R2: 0.93 k: 0.0317 dk: 0.00443

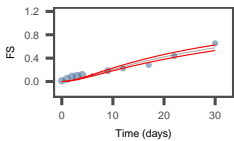

AA Unweighted R2: 0.93 k: 0.0316 dk: 0.00442

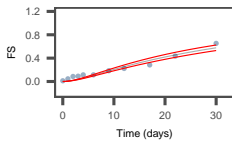

HW Weighted R2: 0.98 k: 0.0229 dk: 0.00156

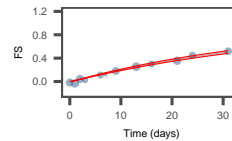

HW Unweighted R2: 0.98 k: 0.0229 dk: 0.00156

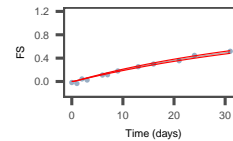

## MIC26

AA Weighted R2: 0.94 k: 0.0333 dk: 0.00488

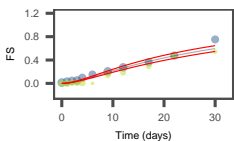

AA Unweighted R2: 0.94 k: 0.0327 dk: 0.00489

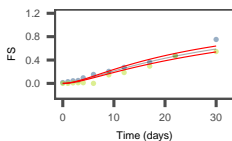

HW Weighted R2: 0.98 k: 0.0335 dk: 0.0031

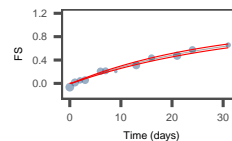

HW Unweighted R2: 0.98 k: 0.0336 dk: 0.00308

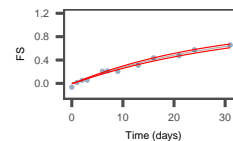

## MIC27

AA Weighted R2: 0.92 k: 0.0253 dk: 0.00414

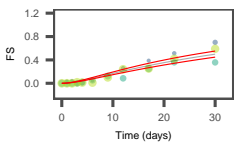

AA Unweighted R2: 0.89 k: 0.0266 dk: 0.00509

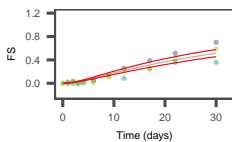

HW Weighted R2: 0.96 k: 0.0284 dk: 0.00292

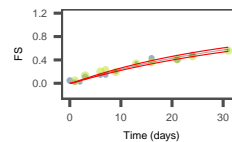

HW Unweighted R2: 0.96 k: 0.0285 dk: 0.00292

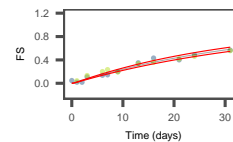

## MIC60

AA Weighted R2: 0.87 k: 0.0383 dk: 0.00829

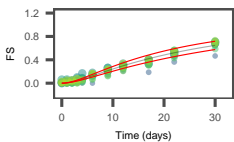

AA Unweighted R2: 0.88 k: 0.0371 dk: 0.00768

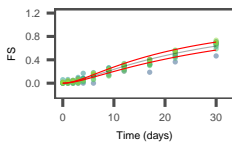

HW Weighted R2: 0.94 k: 0.0252 dk: 0.00347

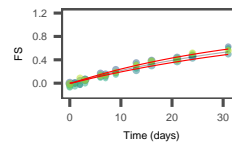

HW Unweighted R2: 0.94 k: 0.0251 dk: 0.00354

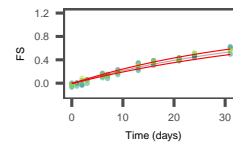

## MLRV

AA Weighted R2: 0.94 k: 0.0712 dk: 0.014

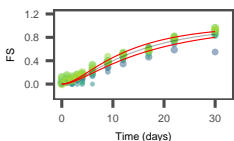

AA Unweighted R2: 0.94 k: 0.0676 dk: 0.0136

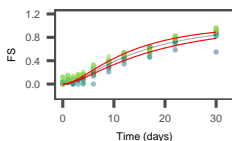

HW Weighted R2: 0.94 k: 0.06 dk: 0.0116

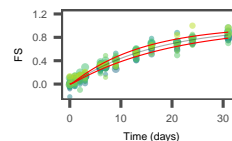

HW Unweighted R2: 0.93 k: 0.058 dk: 0.0122

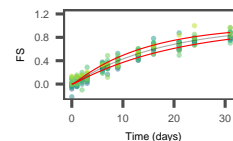

## MMSA

AA Weighted R2: 0.87 k: 0.0411 dk: 0.00966

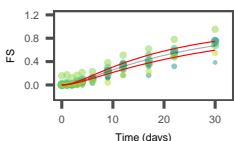

AA Unweighted R2: 0.85 k: 0.0386 dk: 0.0096

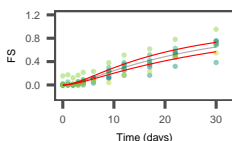

HW Weighted R2: 0.96 k: 0.034 dk: 0.00432

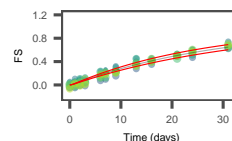

HW Unweighted R2: 0.95 k: 0.0344 dk: 0.00465

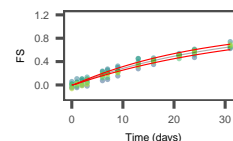

## MOES

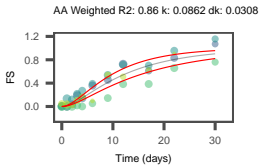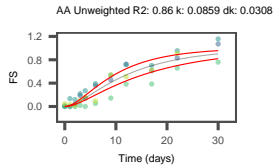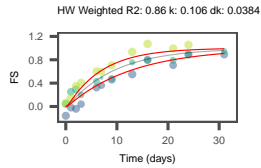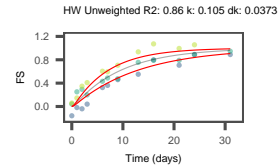

## MOT1

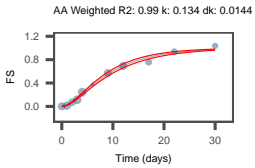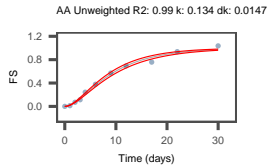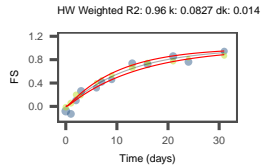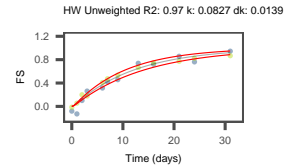

## MPC1

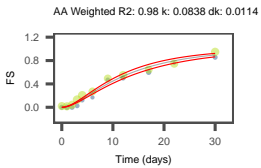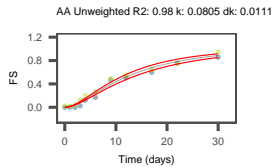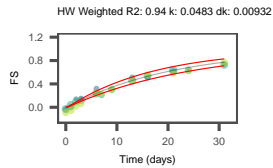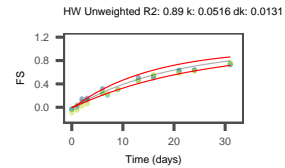

## MPCP

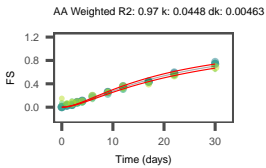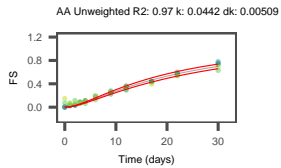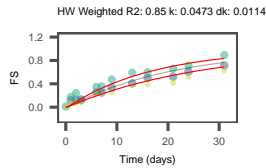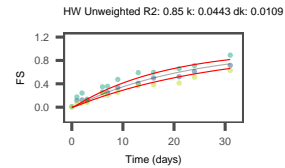

## MPI

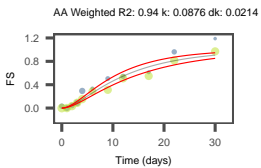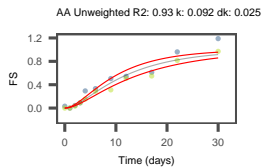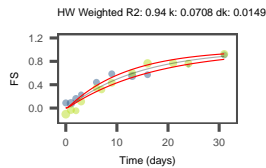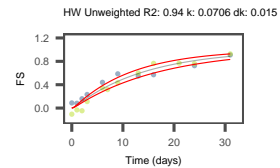

## MSRA

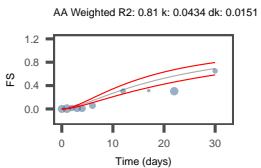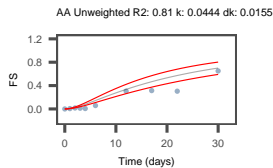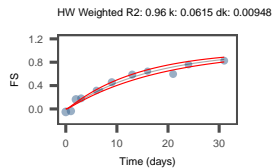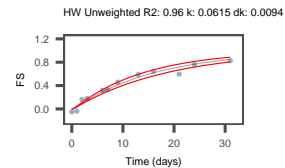

## MSRB2

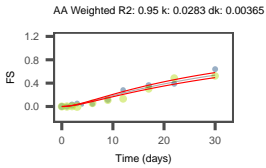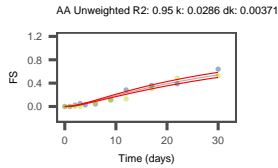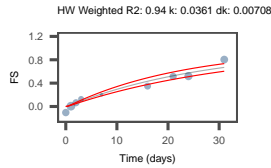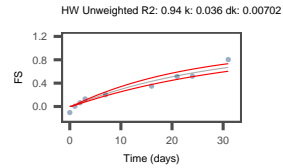

## MTX2

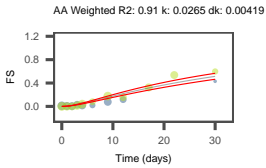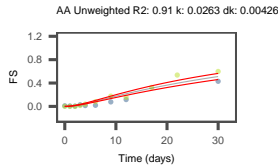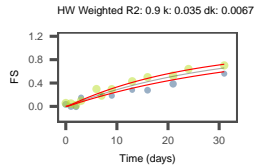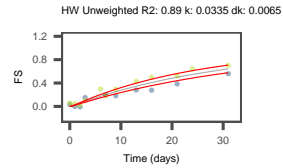

## MUTA

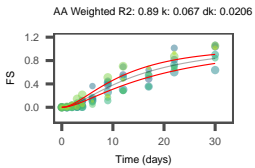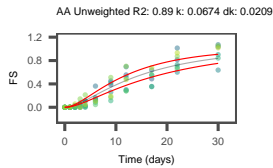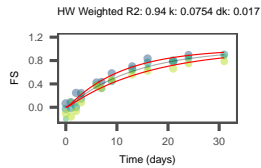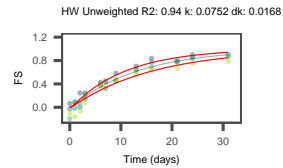

## MYG

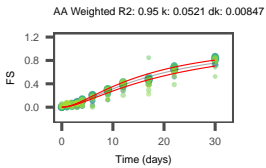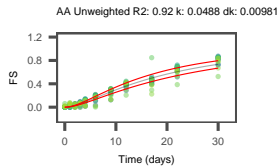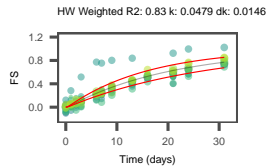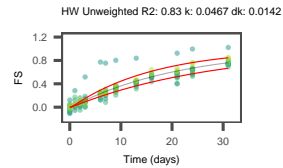

## MYH11

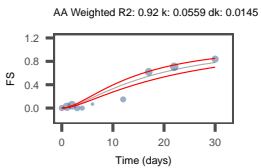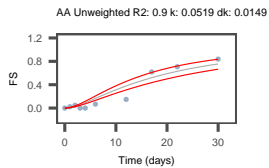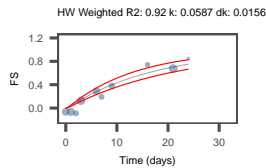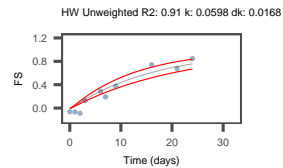

## MYH6

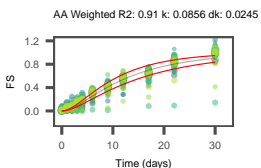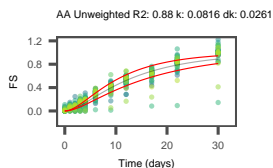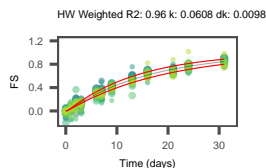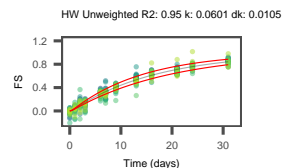

MYH7

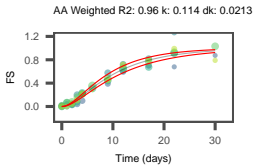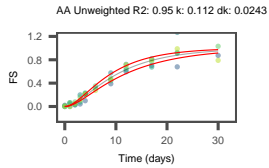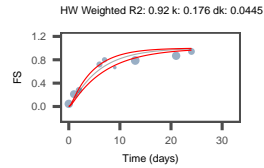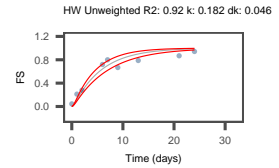

MYH9

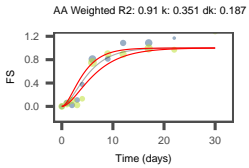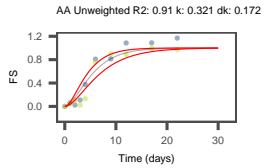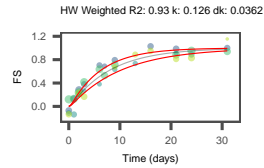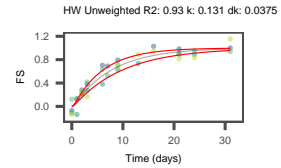

MYL3

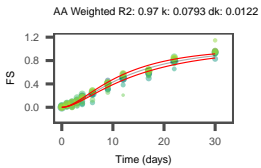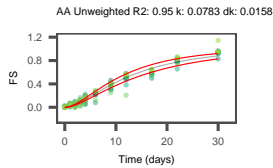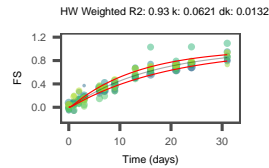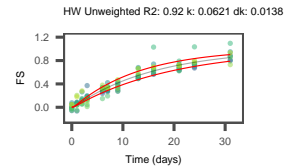

MYL6

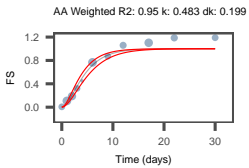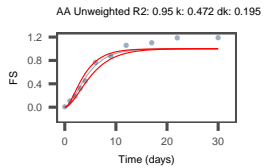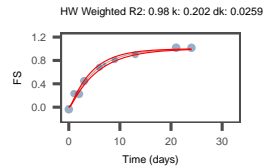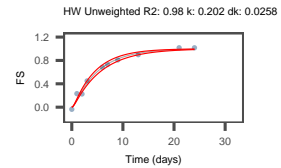

MYOM1

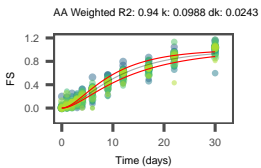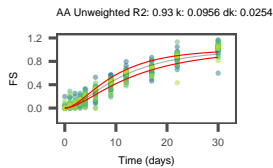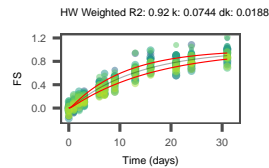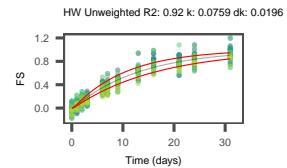

MYOT1

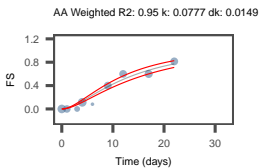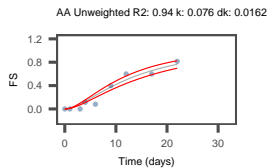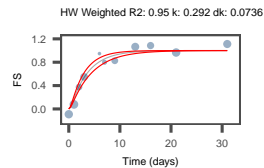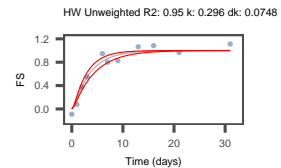

## MYO22

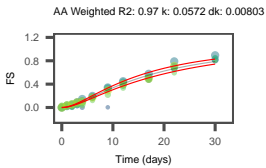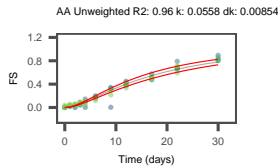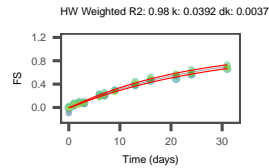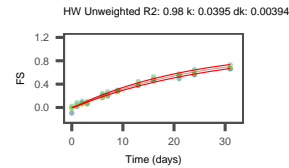

## MYPC3

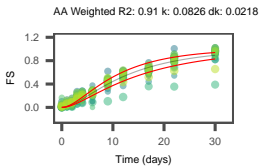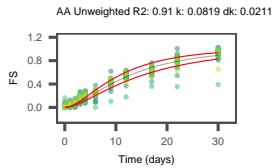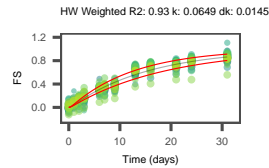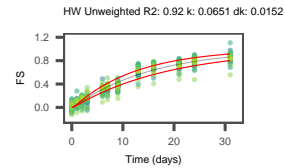

## NAC1

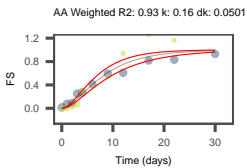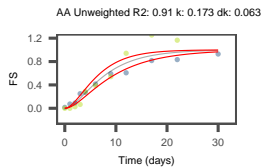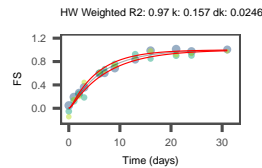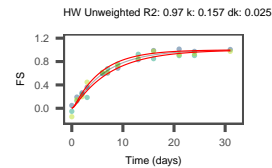

## NACAM

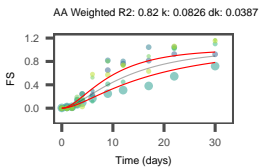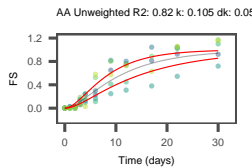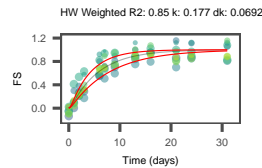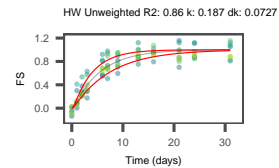

## NAMPT

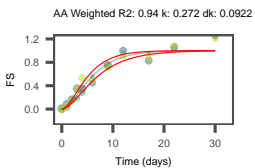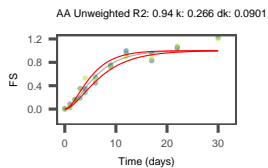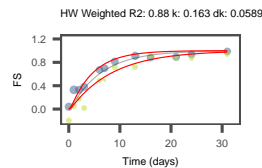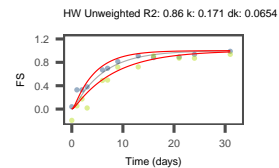

## NAR3

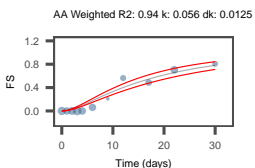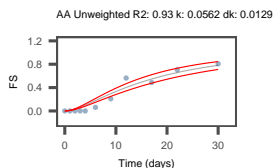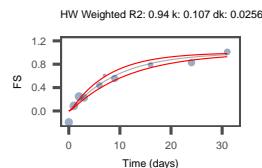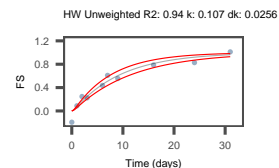



**NDKB**

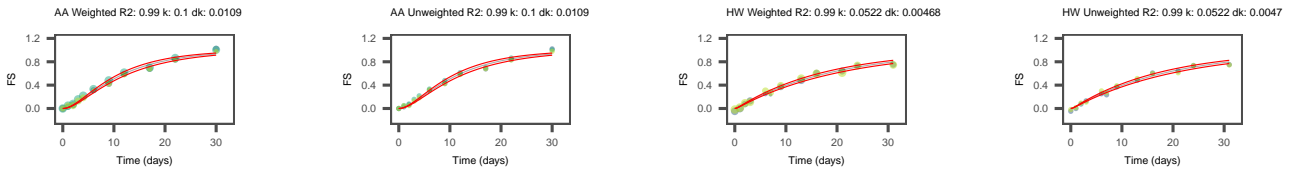

**NDRG2**

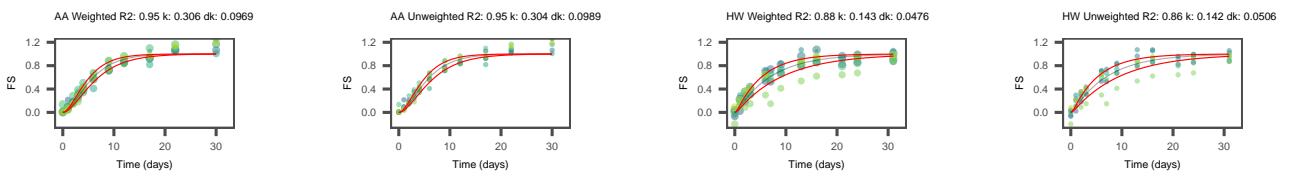

**NDUA2**

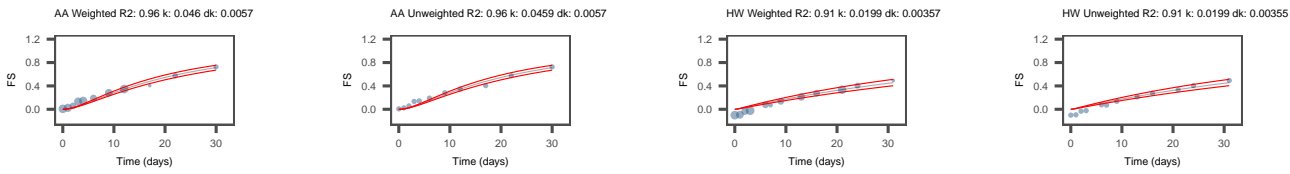

**NDUA3**

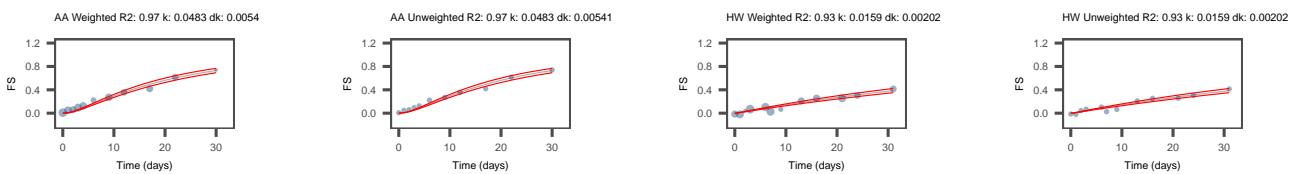

**NDUA6**

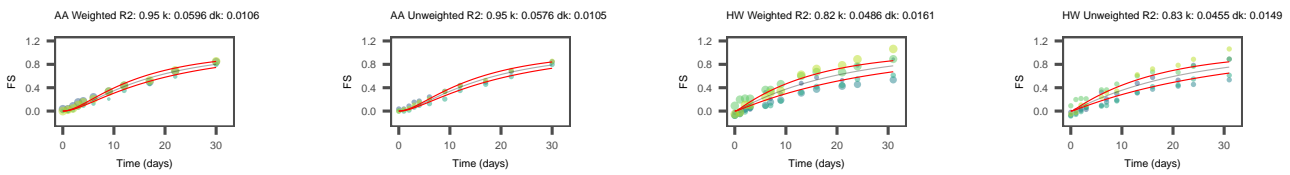

**NDUA7**

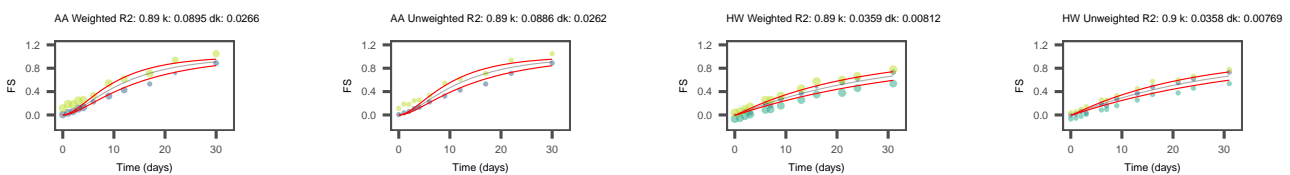

## NDUA8

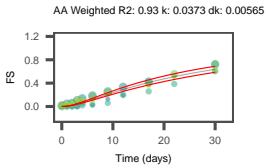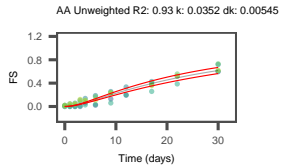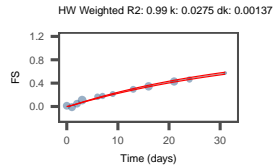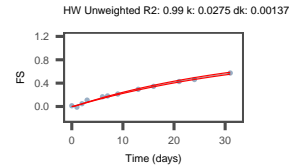

## NDUA9

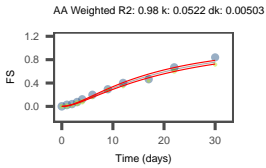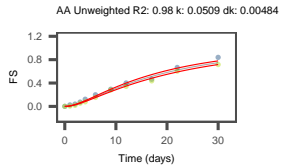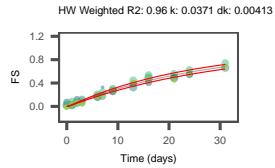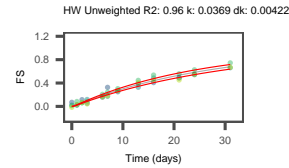

## NDUAA

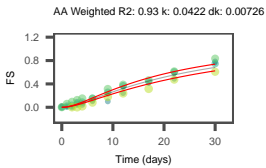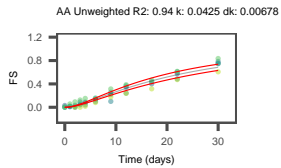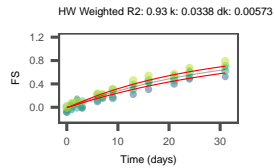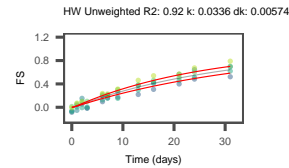

## NDUAB

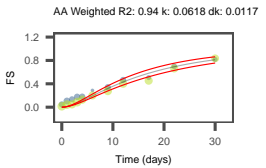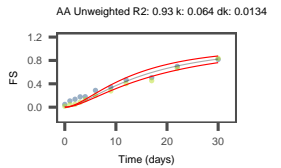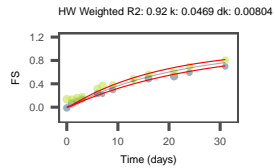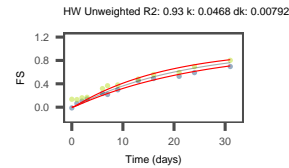

## NDUAC

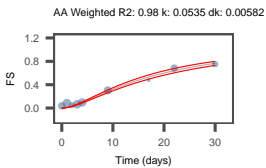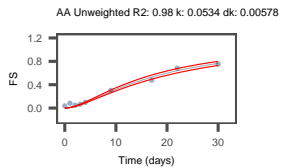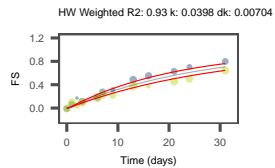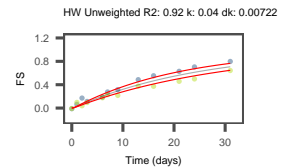

## NDUAD

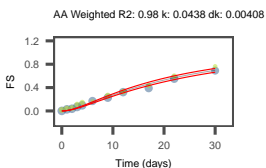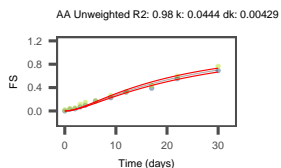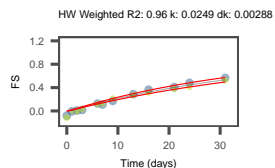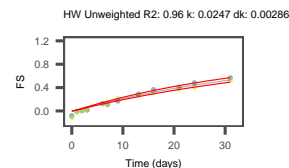

NDUB1

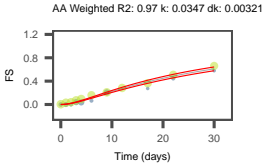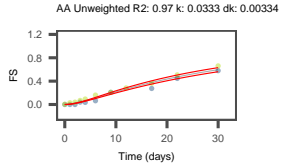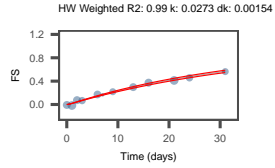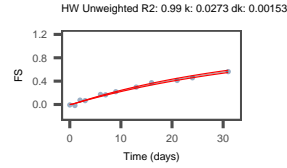

NDUB3

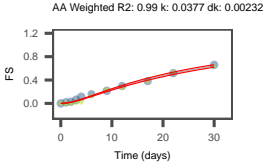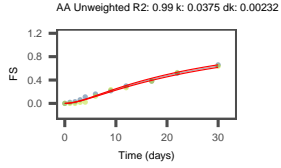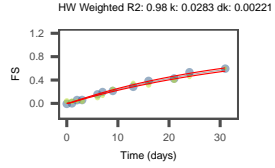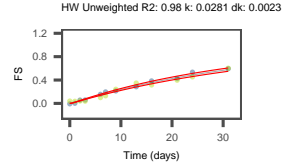

NDUB4

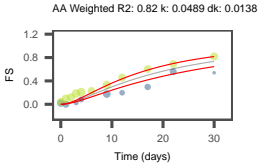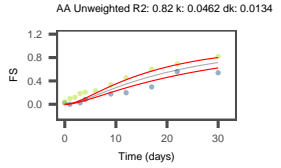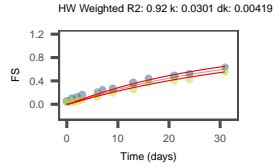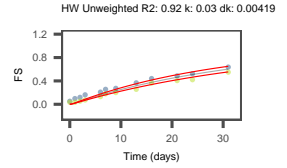

NDUB5

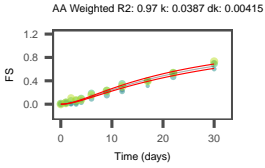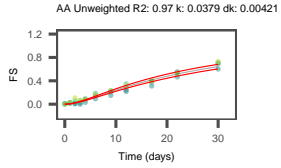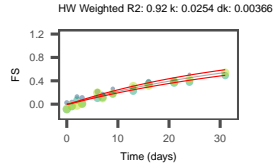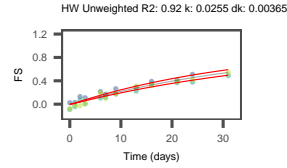

NDUB7

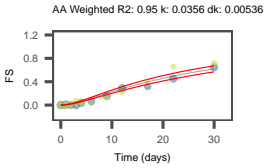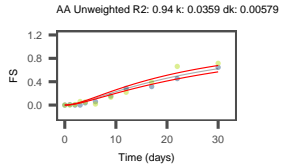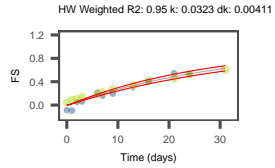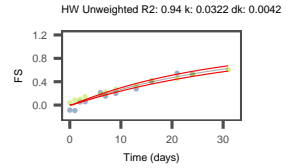

NDUB9

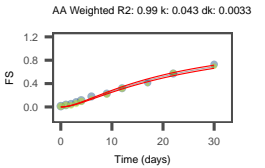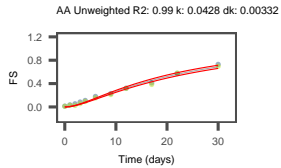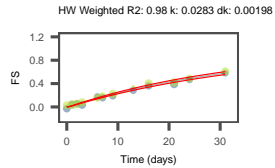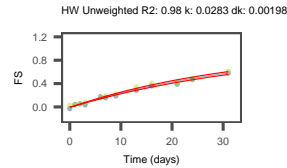

## NDUBA

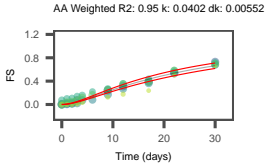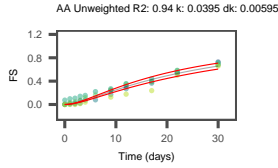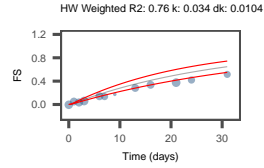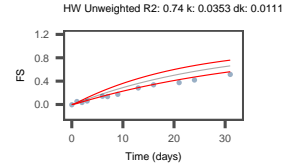

## NDUBB

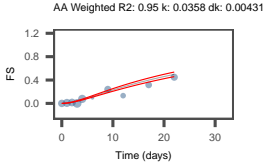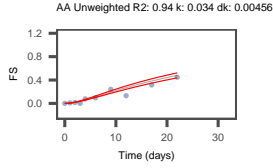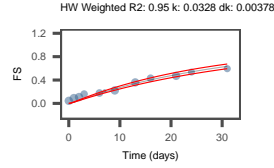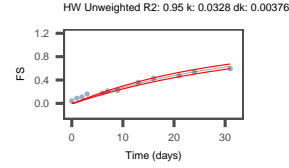

## NDUC2

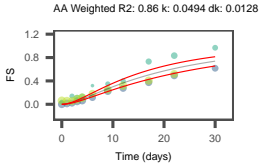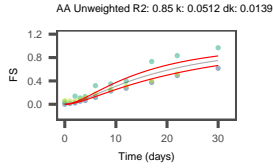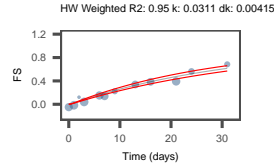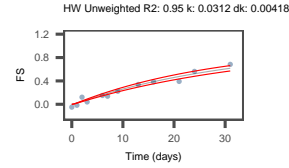

## NDUF4

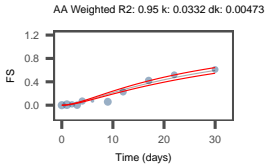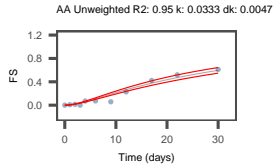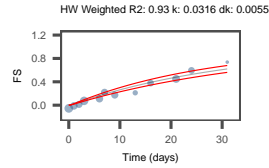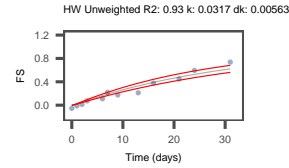

## NDUS1

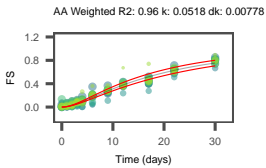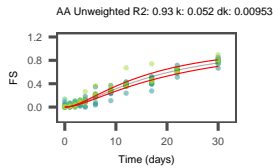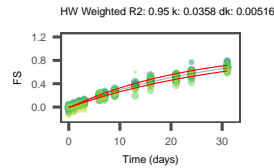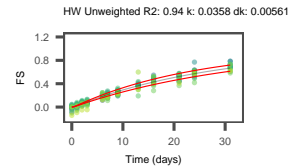

## NDUS2

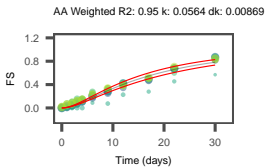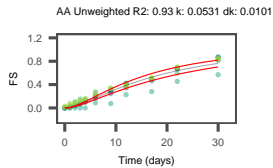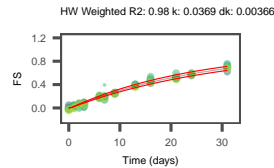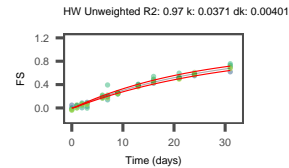

## NDUS3

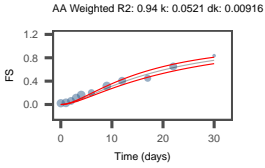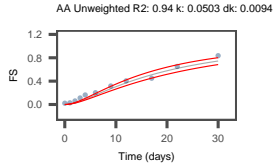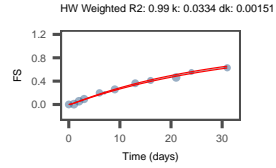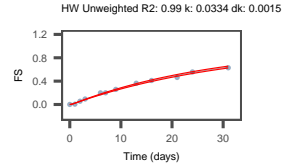

## NDUS4

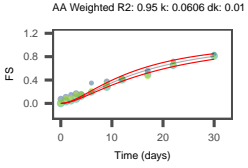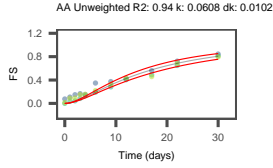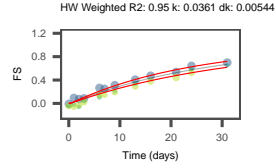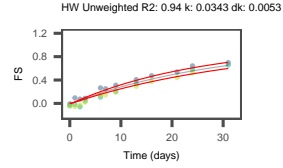

## NDUS6

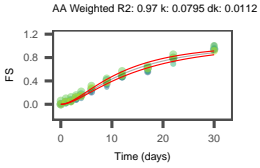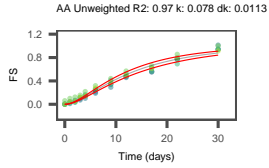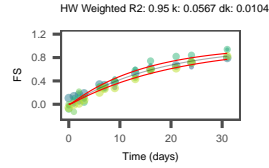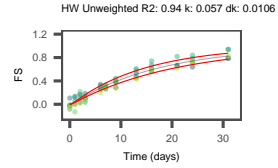

## NDUS7

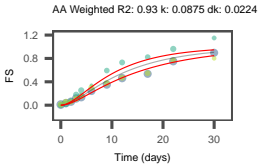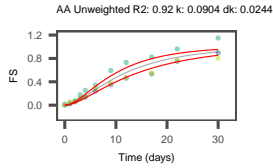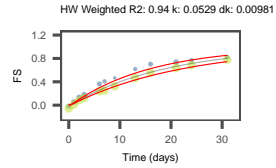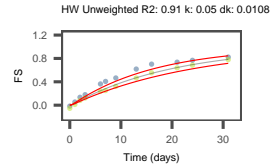

## NDUS8

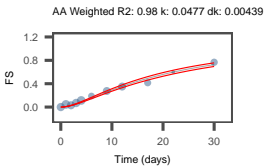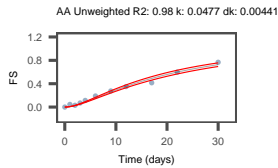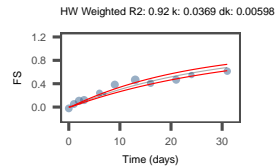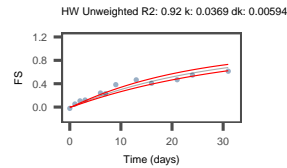

## NDUV1

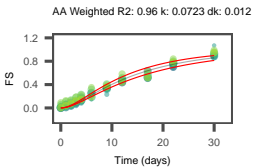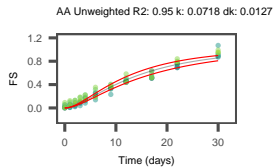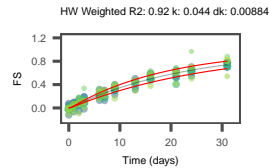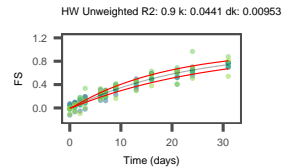

## NDUV2

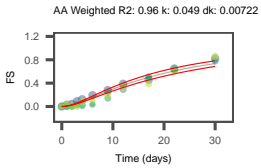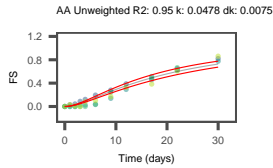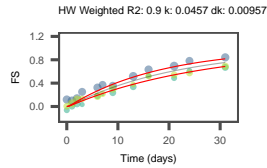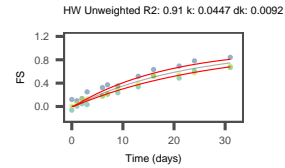

## NDUV3

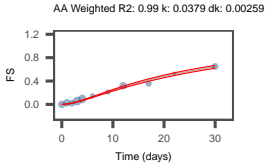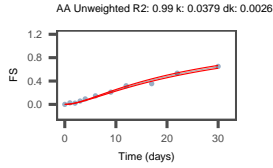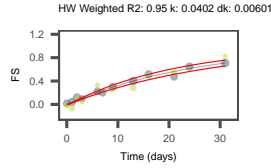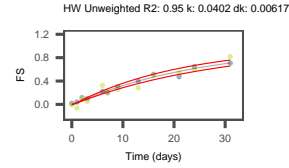

## NEBL

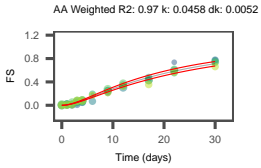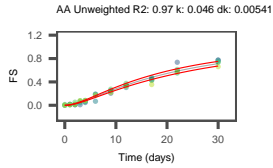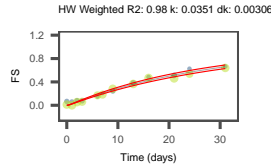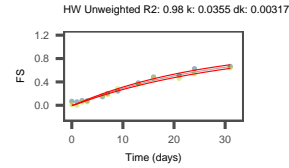

## NID1

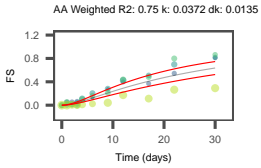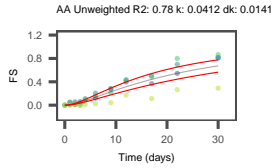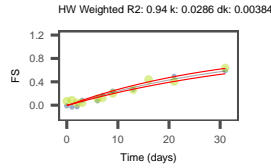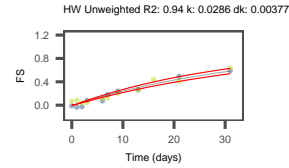

## NIPS2

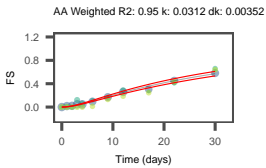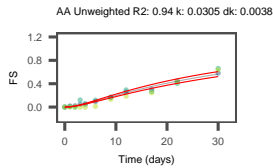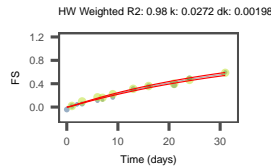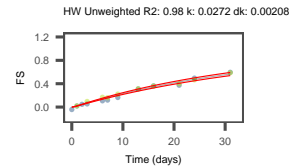

## NIT2

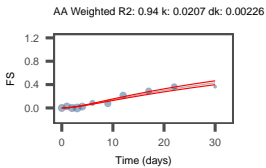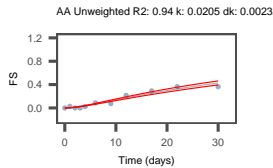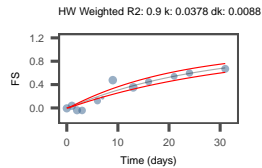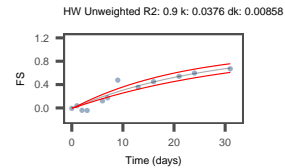

## NNTM

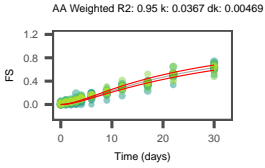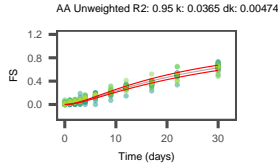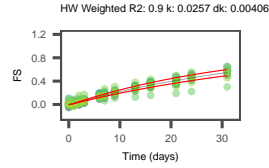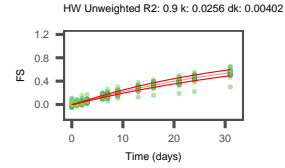

## NTF2

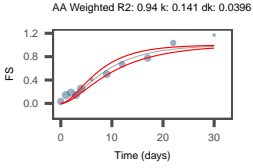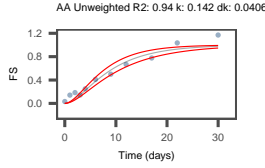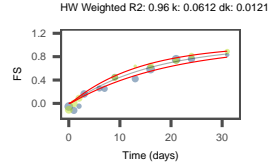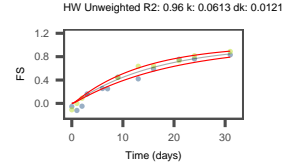

## NU1M

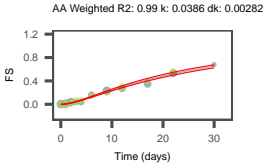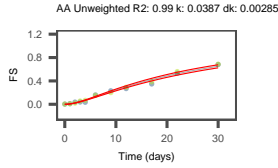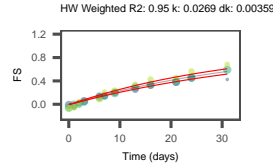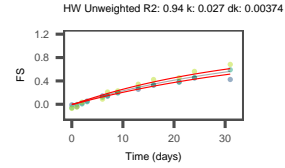

## NU2M

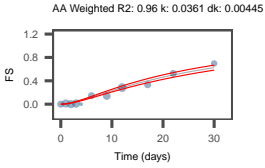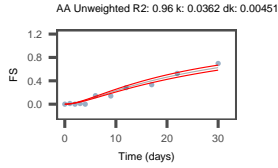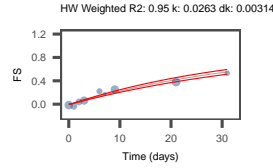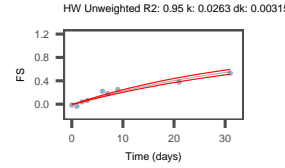

## NU4M

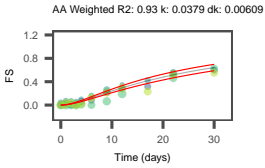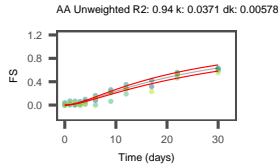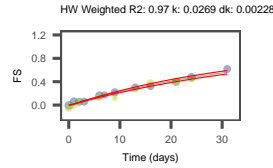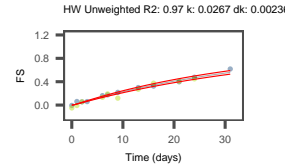

## NU5M

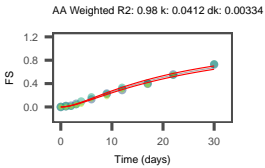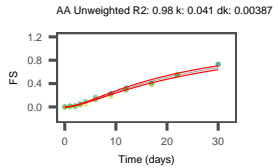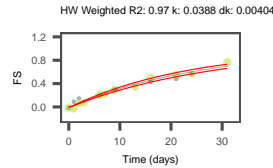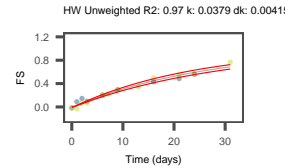

## NUDT8

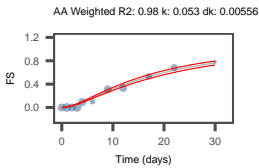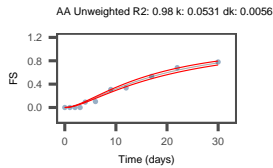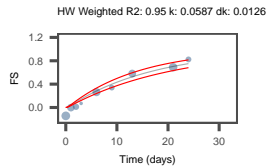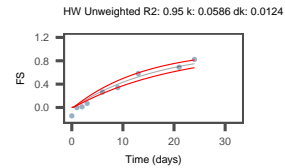

## OAT

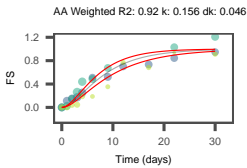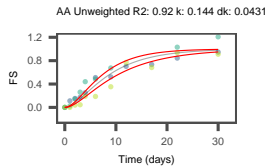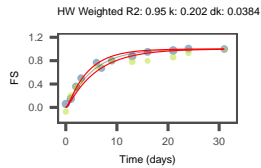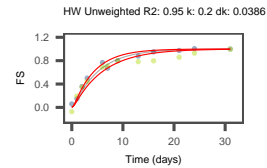

## OBSCN

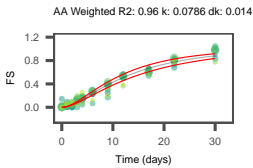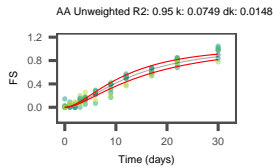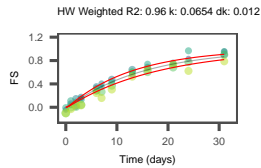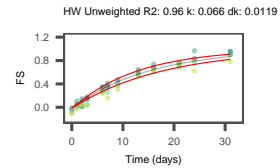

## ODB2

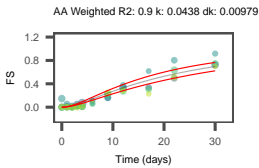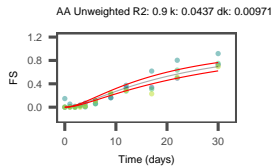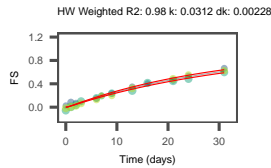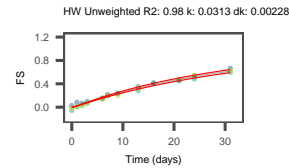

## ODBB

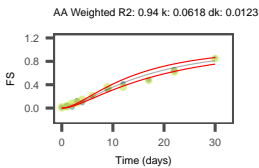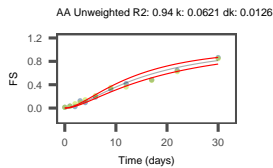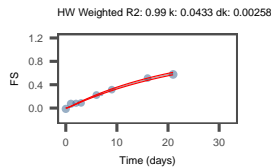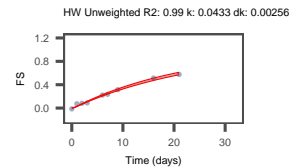

## ODO1

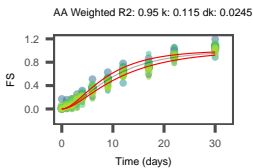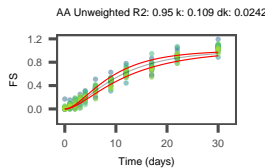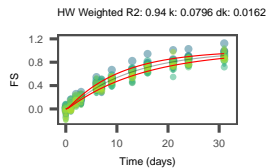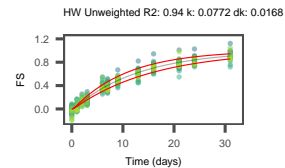



ODO2

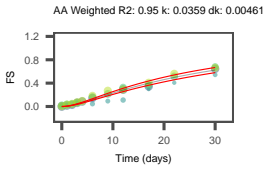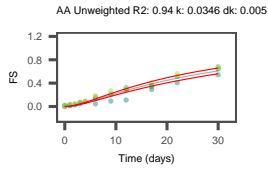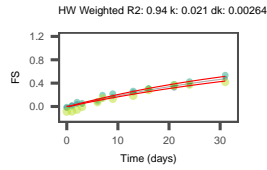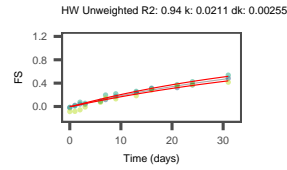

ODP2

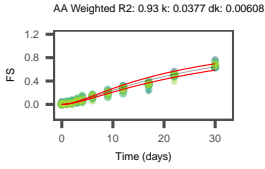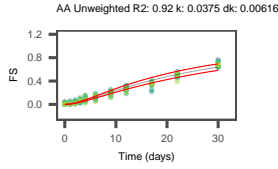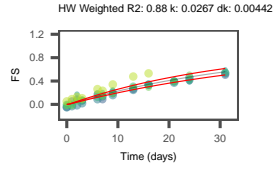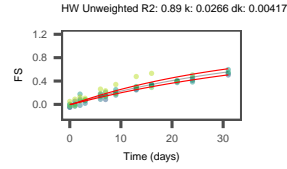

ODPA

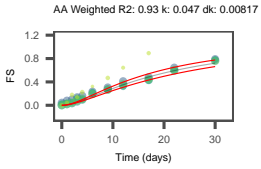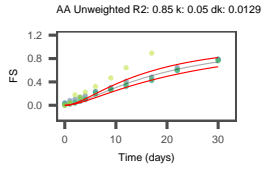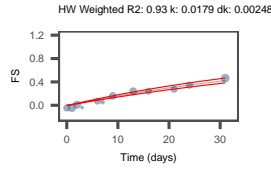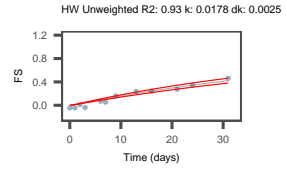

ODPB

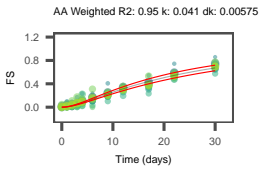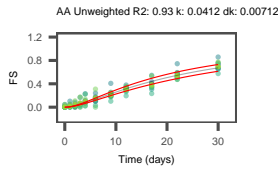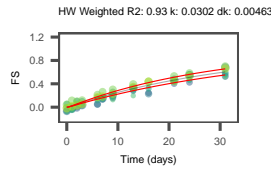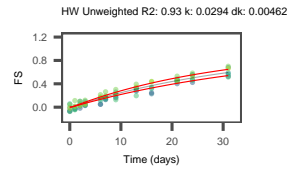

ODPX

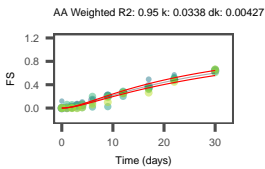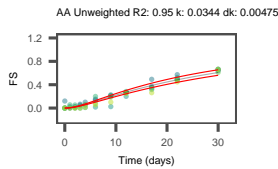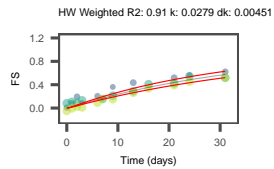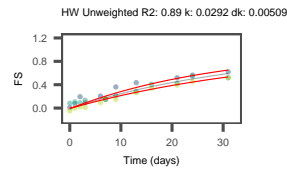

OLA1

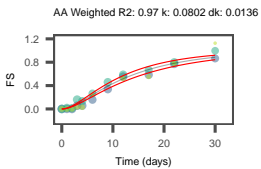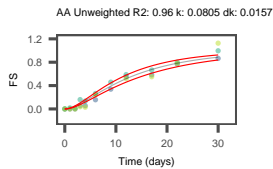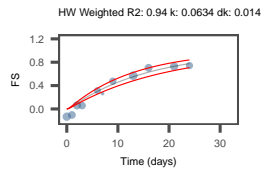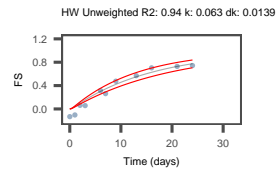

OPA1

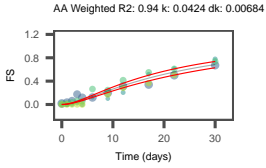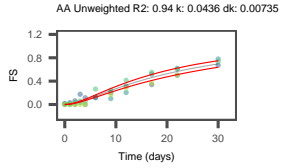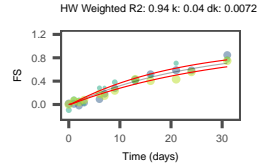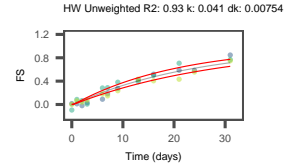

OTUB1

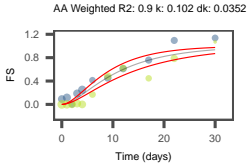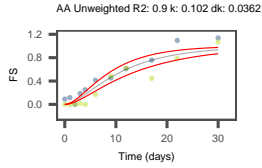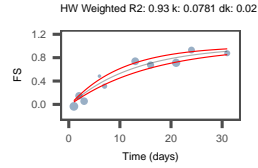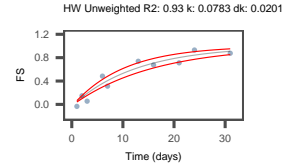

PARK7

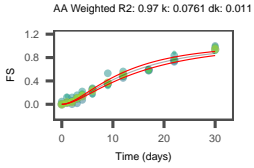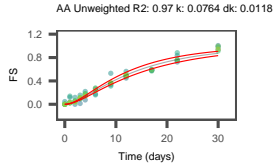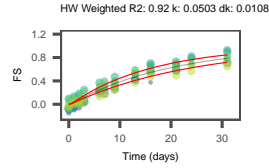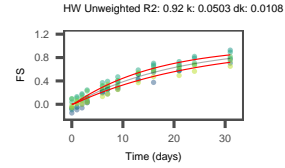

PCBP1

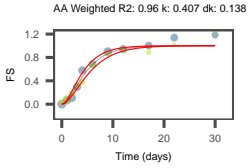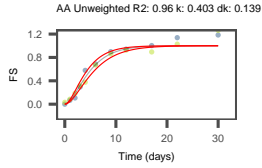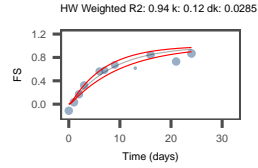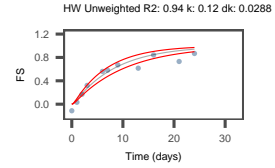

PCBP2

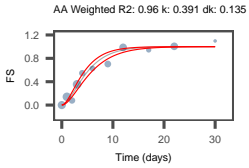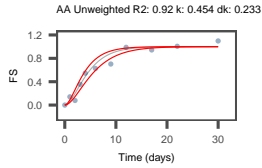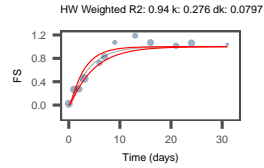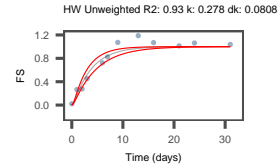

PCCA

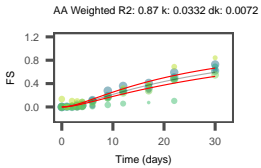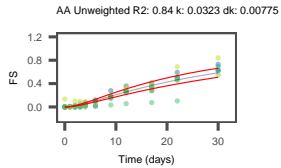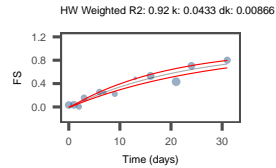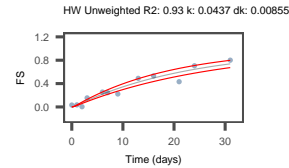

PCCB

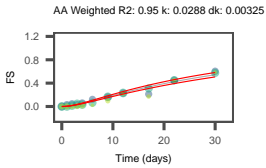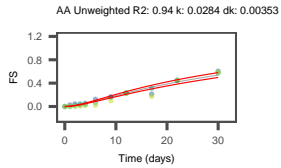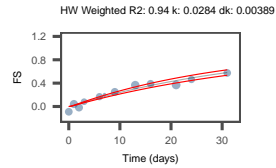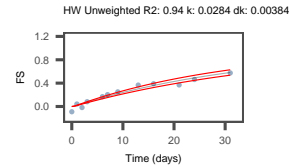

PDIA1

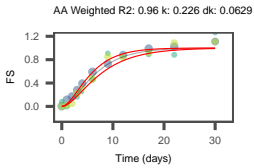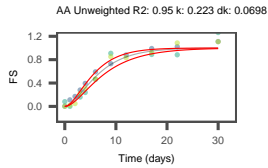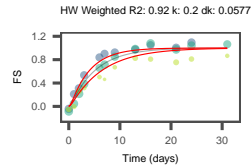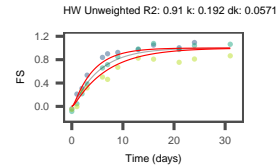

PDIA3

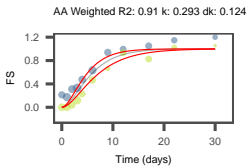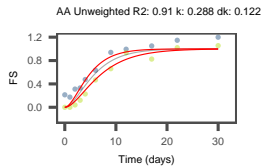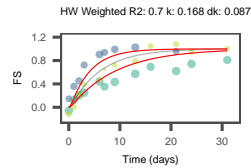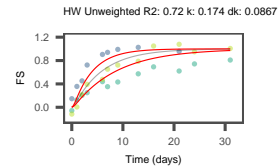

PDK2

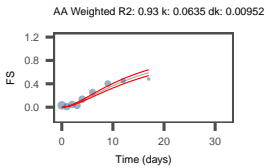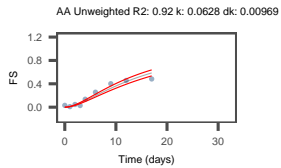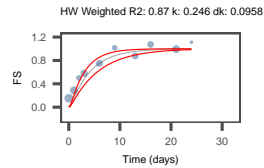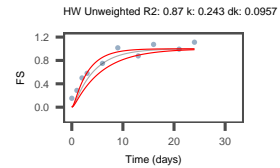

PDL15

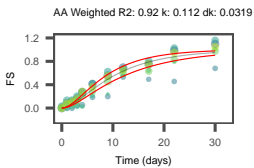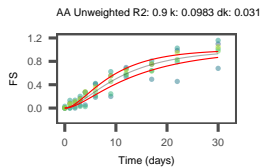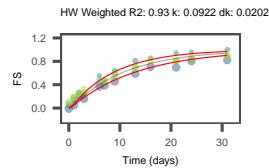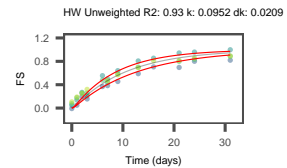

PEBP1

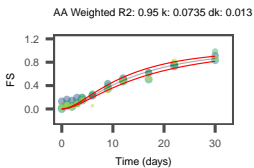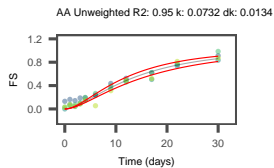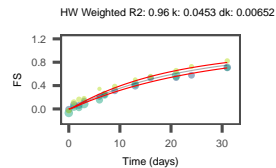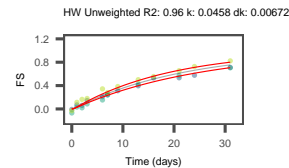

## PERM1

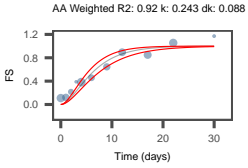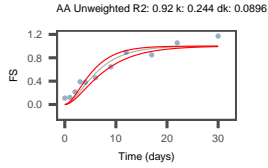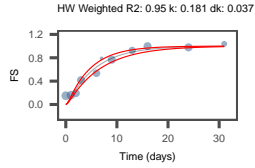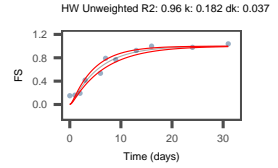

## PFKAM

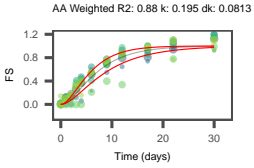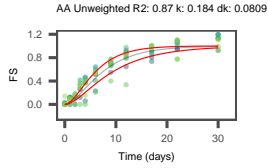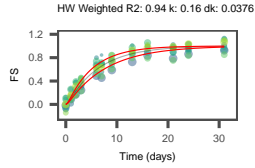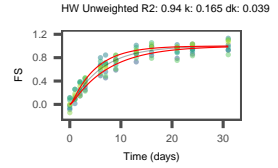

## PGAM1

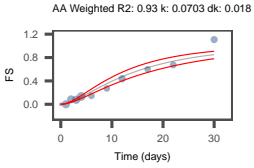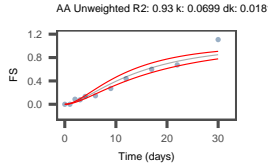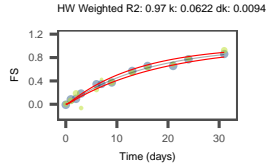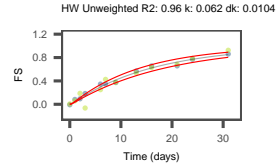

## PGAM2

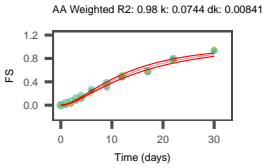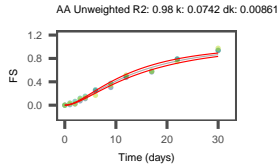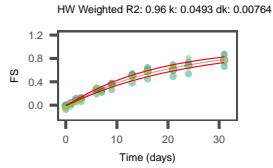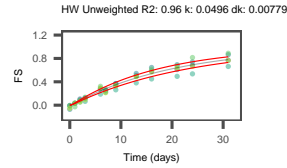

## PGBM

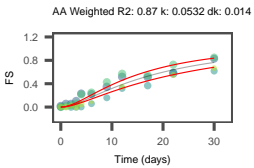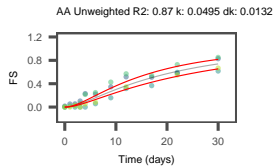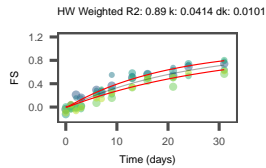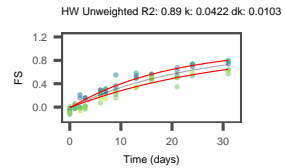

## PGK1

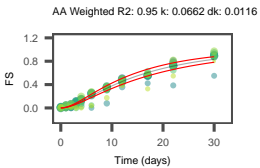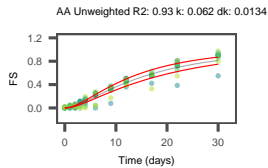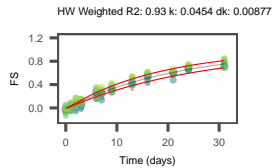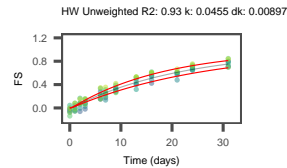

## PGM1

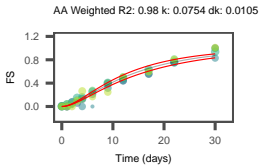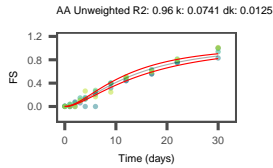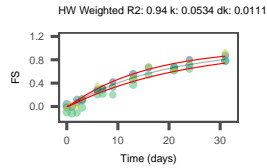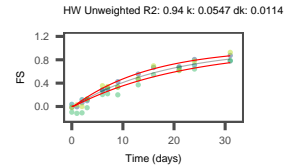

## PHB

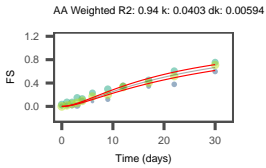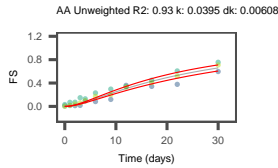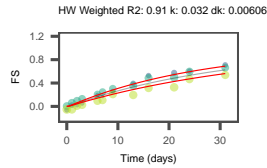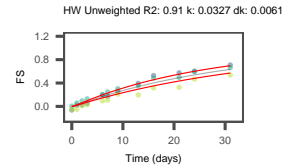

## PHB2

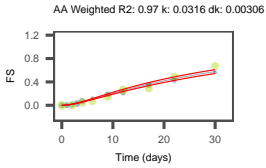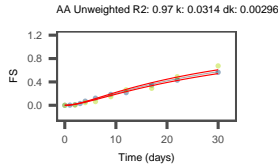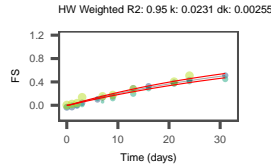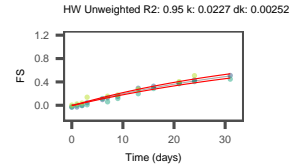

## PHP14

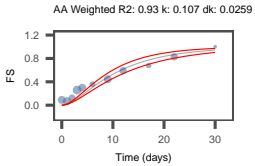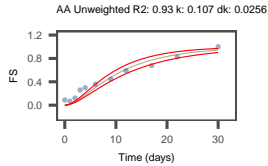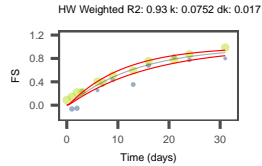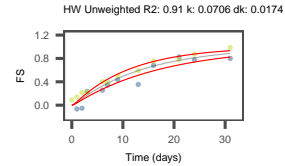

## PIMT

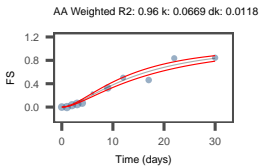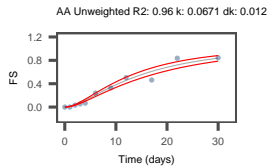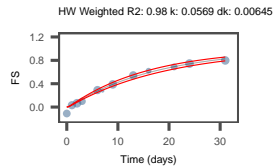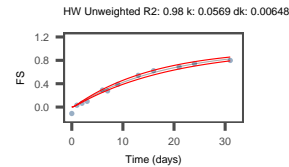

## PLAK

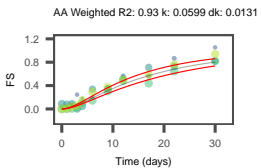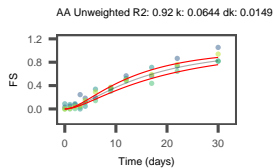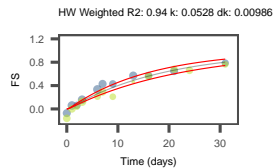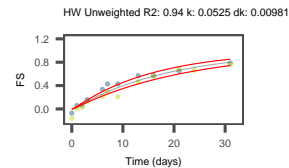

## PLEC

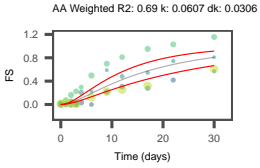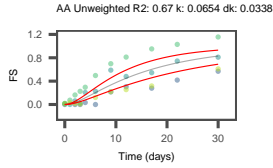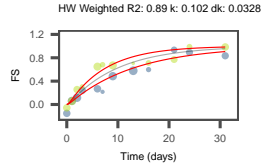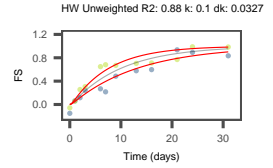

## PLIN3

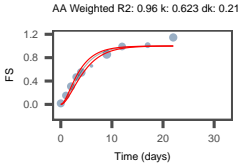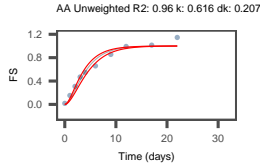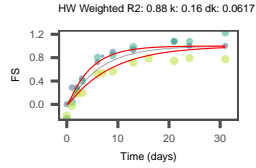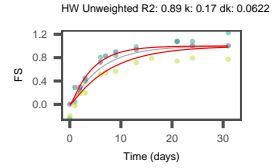

## PLIN4

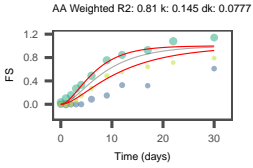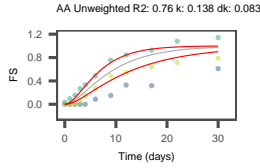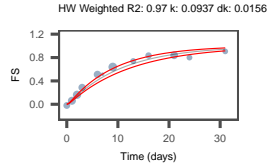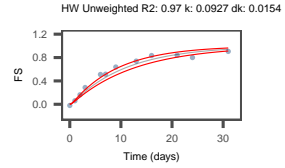

## PLST

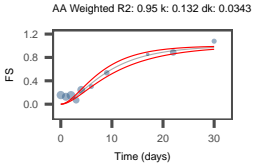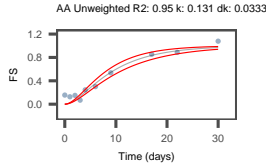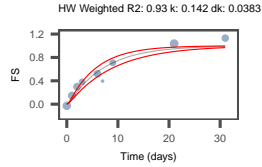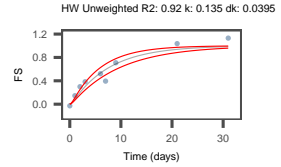

## PRDX2

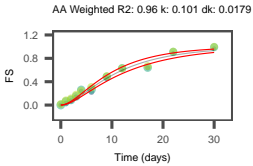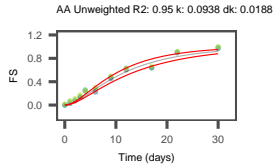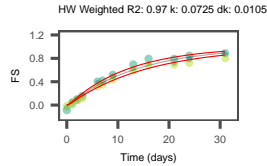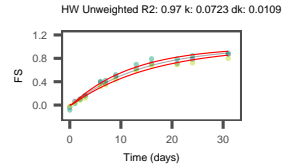

## PRDX3

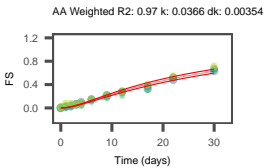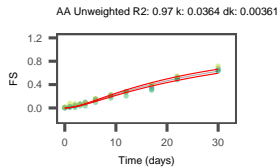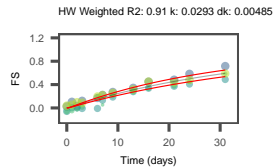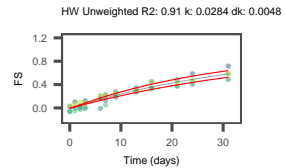

## PRDX5

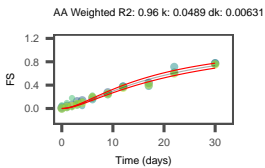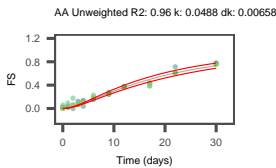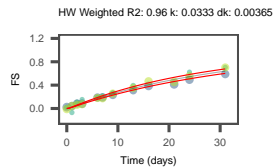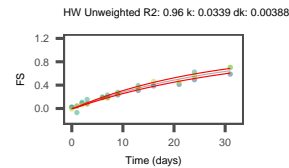

## PRDX6

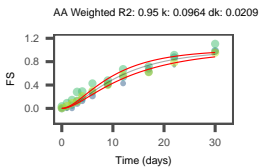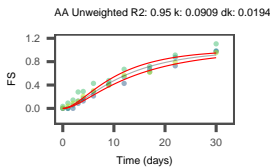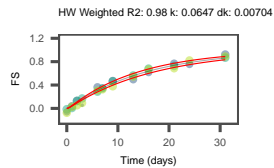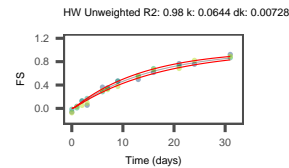

## PROF1

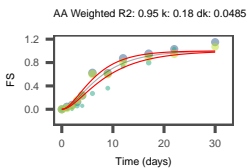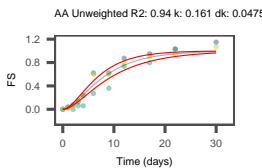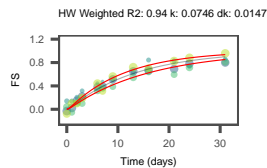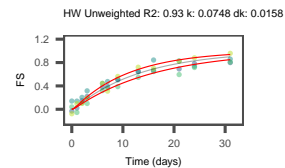

## PSA

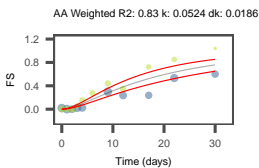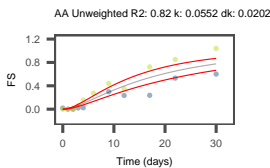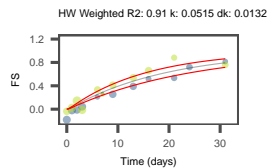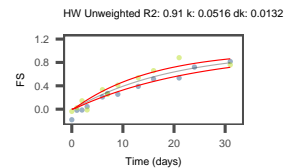

## PSA2

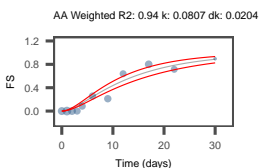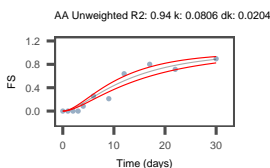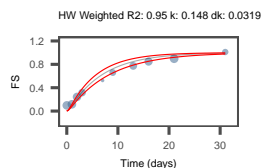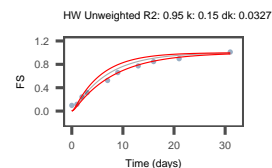

## PSA3

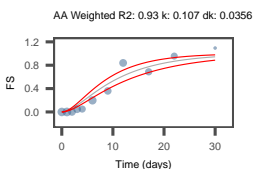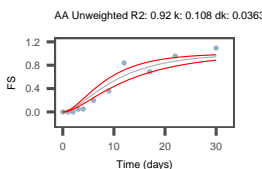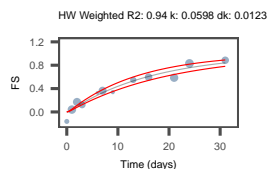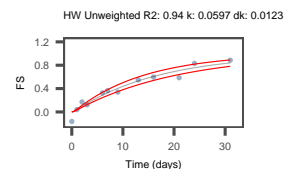

## PSA4

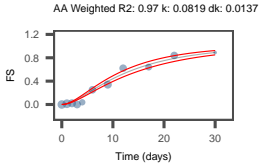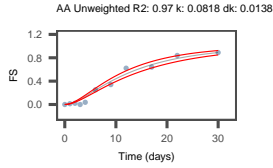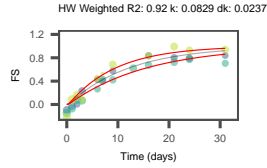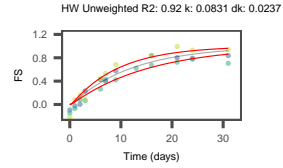

## PSB3

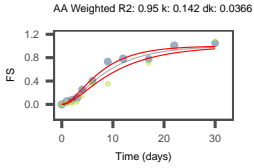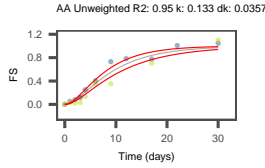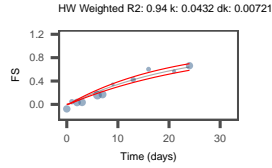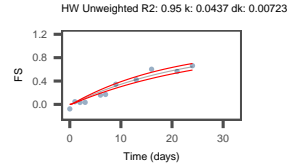

## PSD11

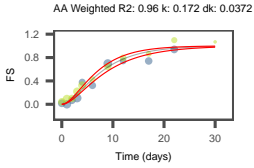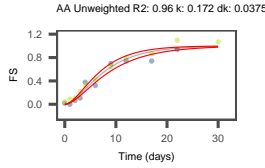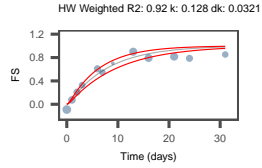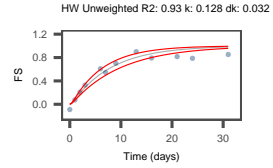

## PSD12

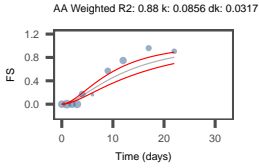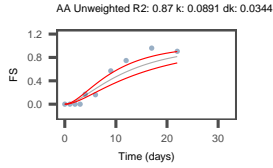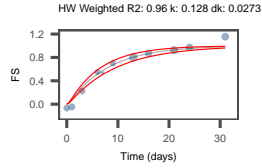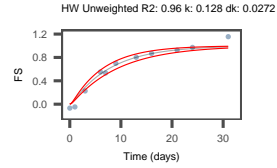

## PSMD2

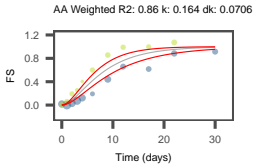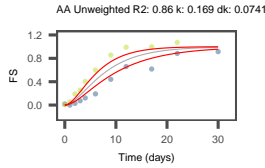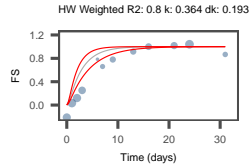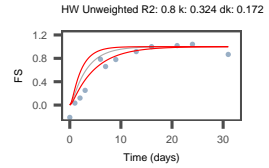

## PSMD8

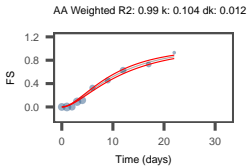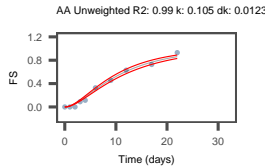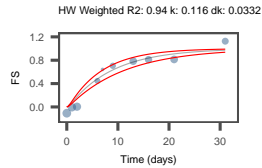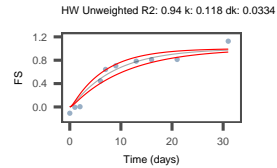



## PTGR2

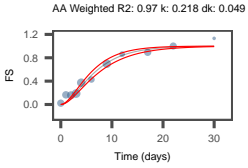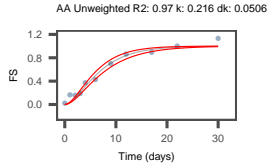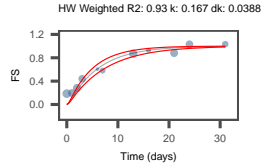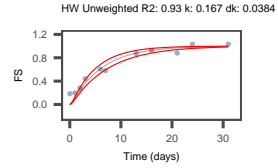

## PTGR3

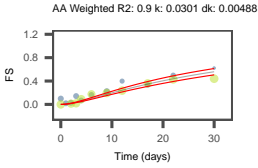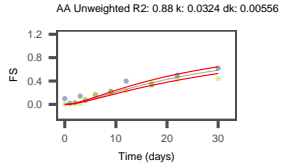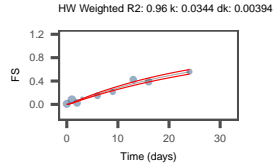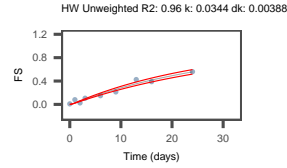

## PURA1

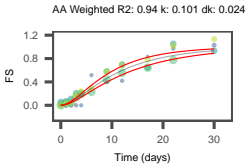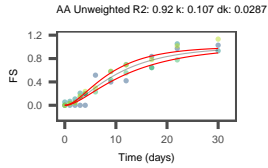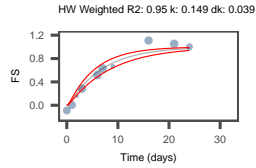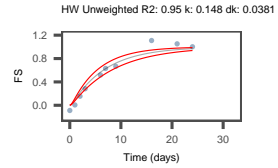

## PXMP2

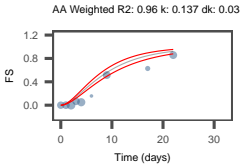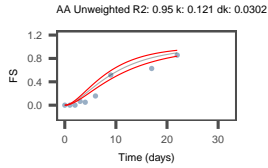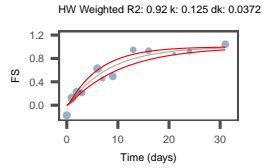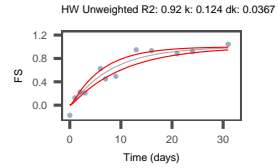

## PYGB

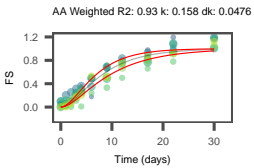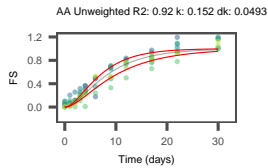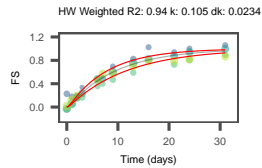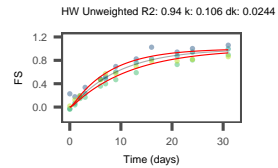

## PYGM

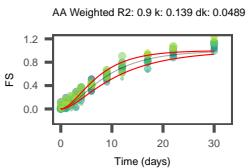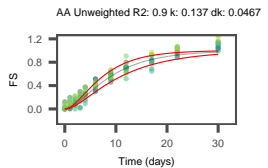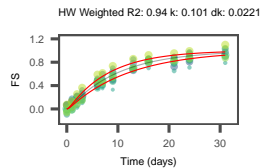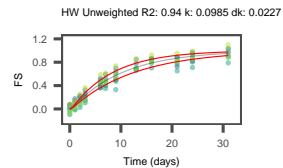

PZP

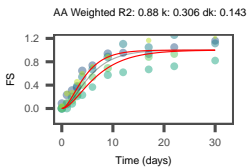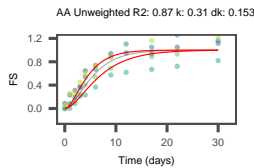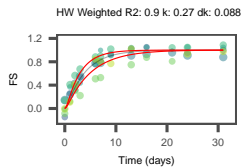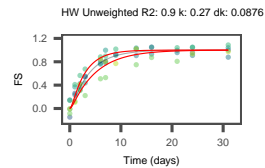

QCR1

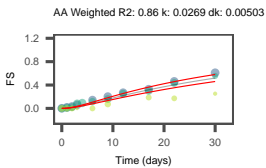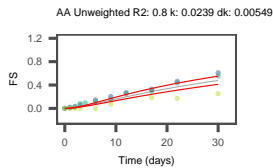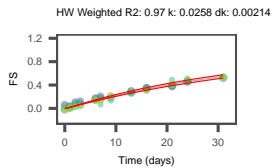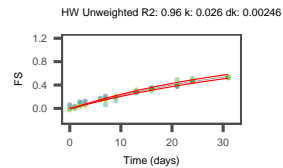

QCR10

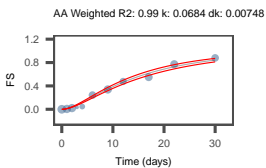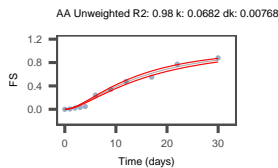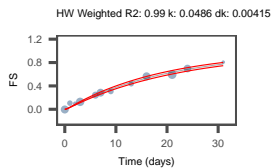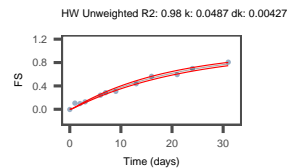

QCR2

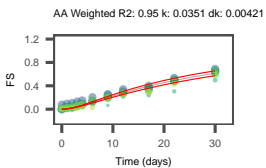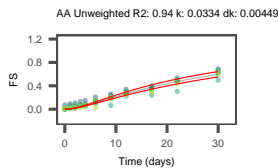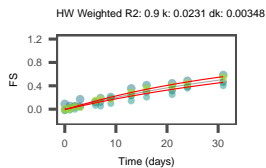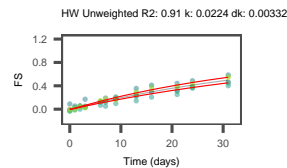

QCR7

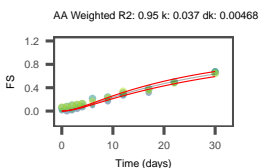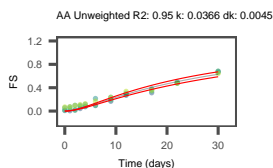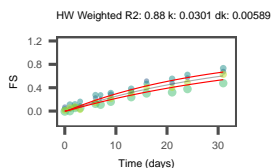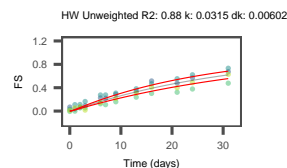

RAB1B

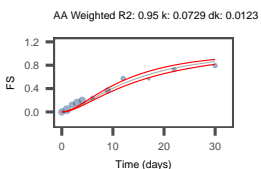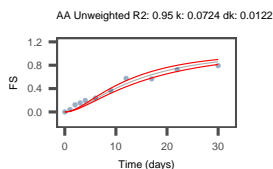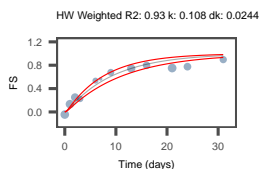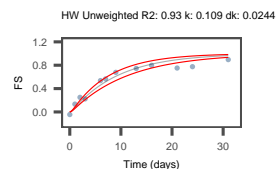

## RACK1

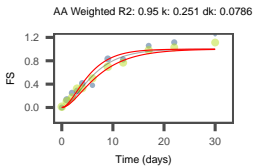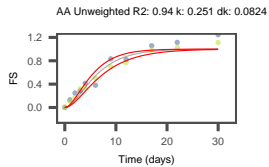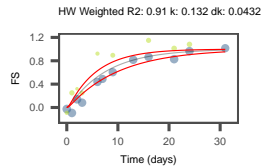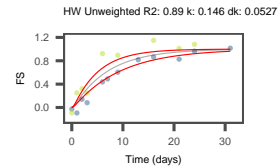

## REEP5

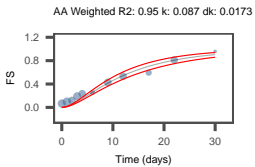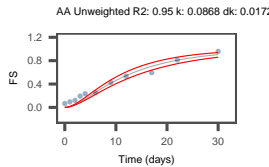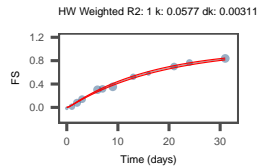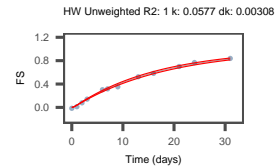

## RL15

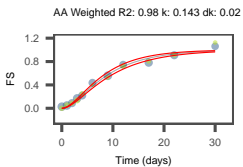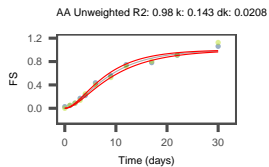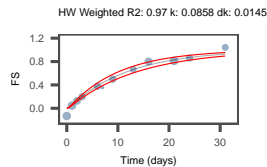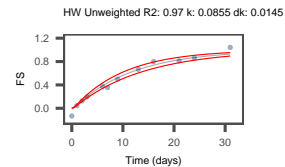

## RL23

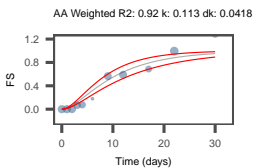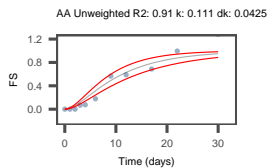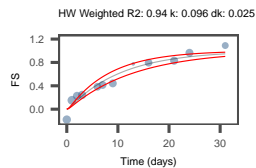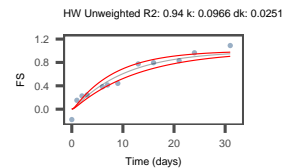

## RL4

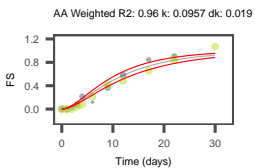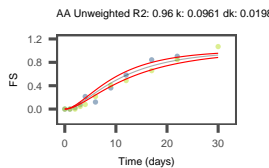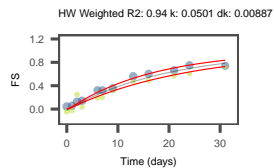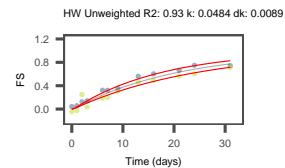

## RL5

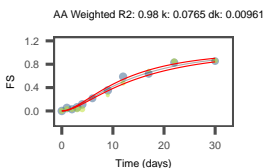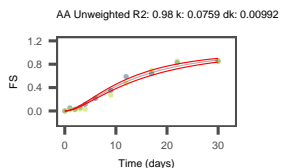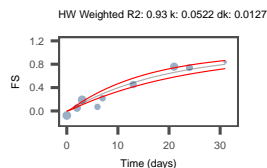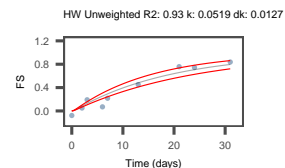

## RL7A

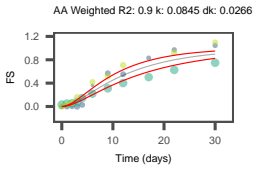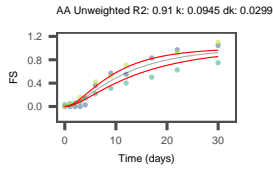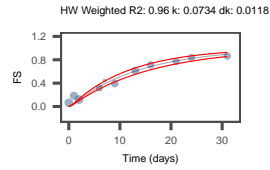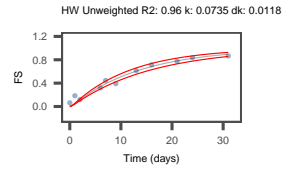

## RL8

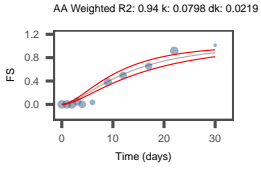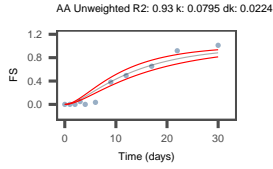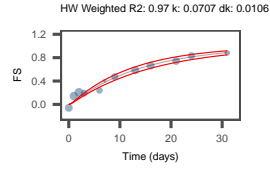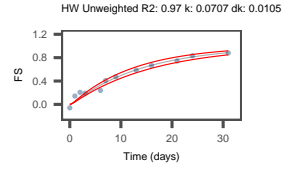

## RL9

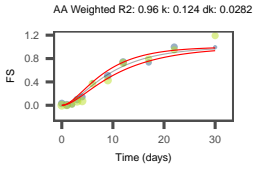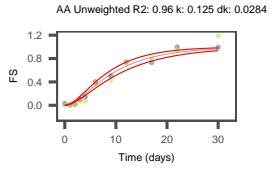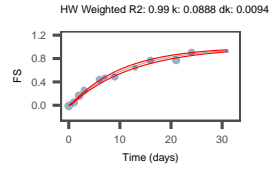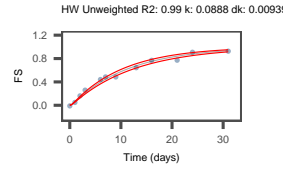

## RLA0

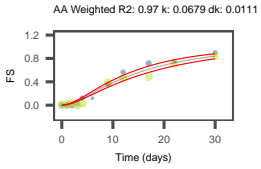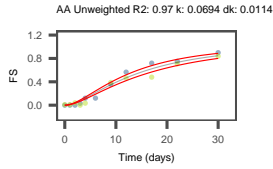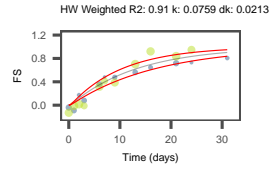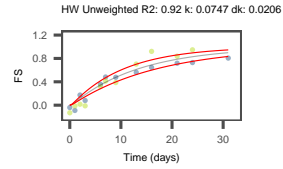

## RLA2

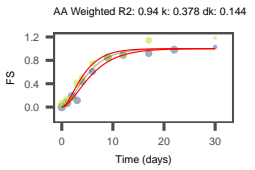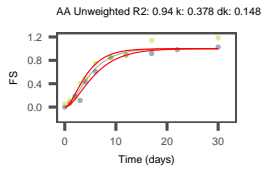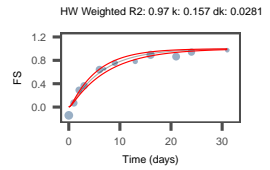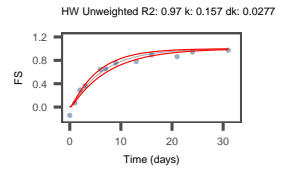

## ROA2

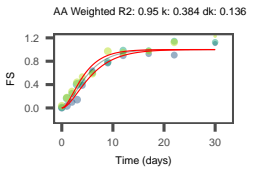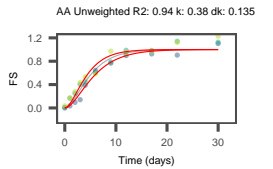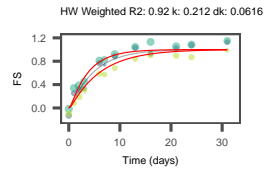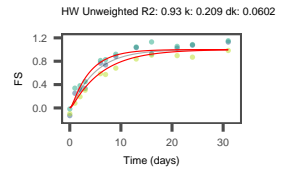

ROA3

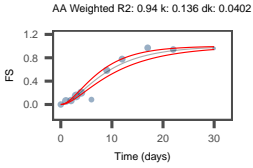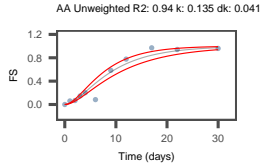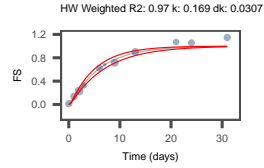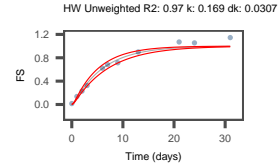

RS10

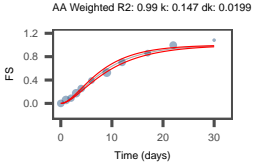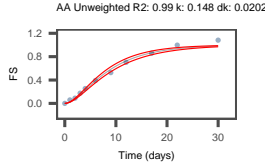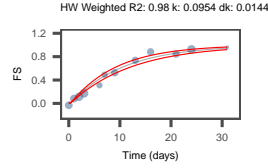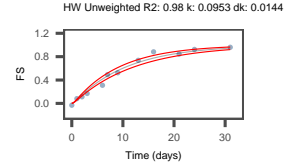

RS11

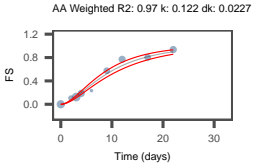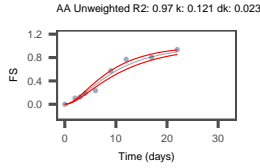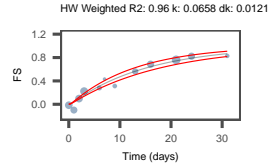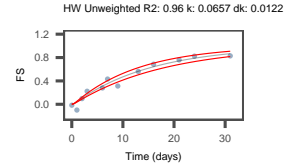

RS13

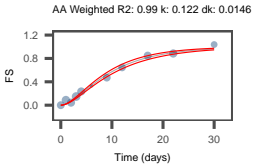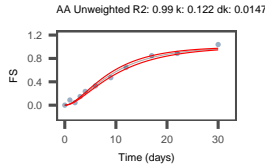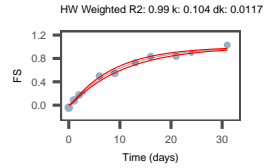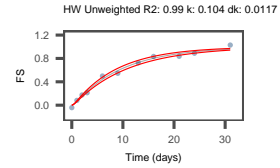

RS14

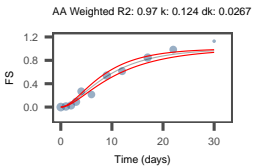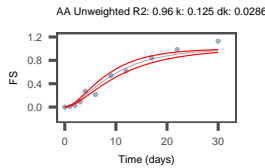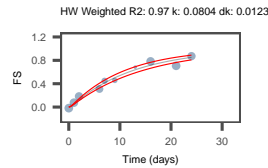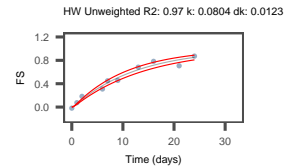

RS15

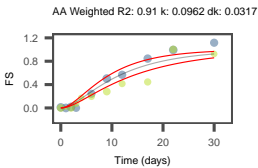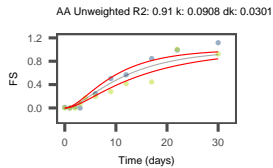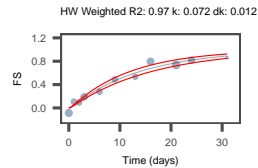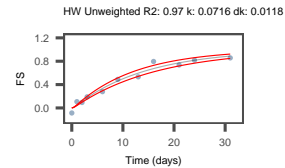

RS16

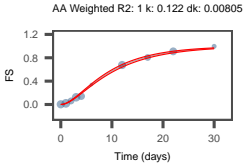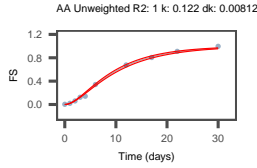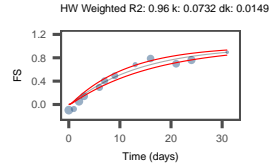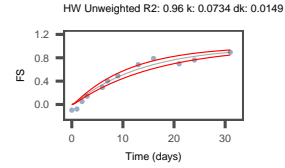

RS17

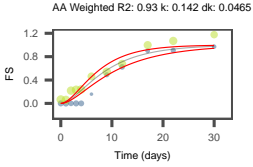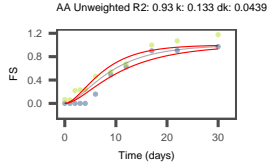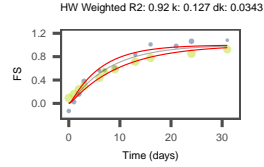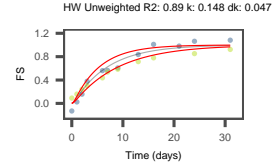

RS2

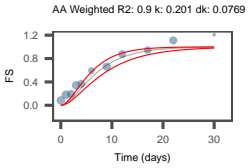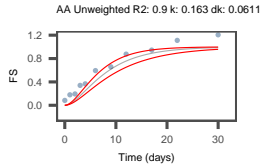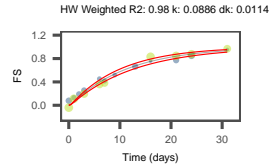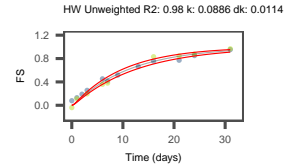

RS23

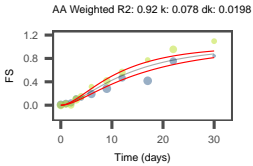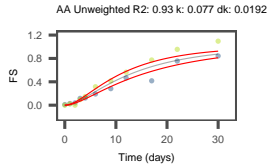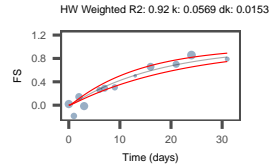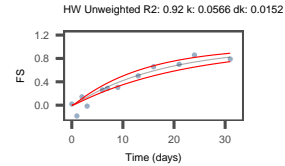

RS24

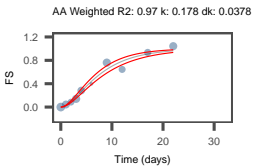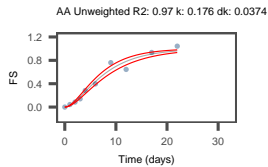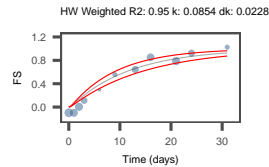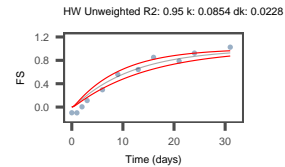

RS4X

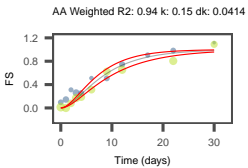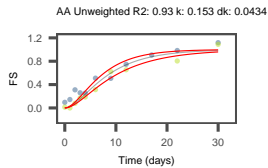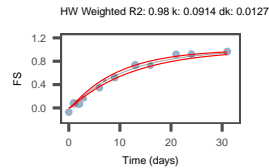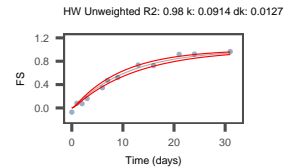

RS7

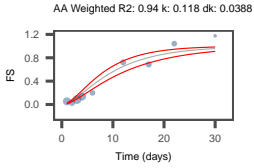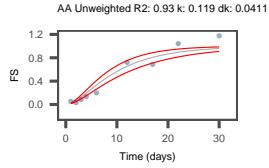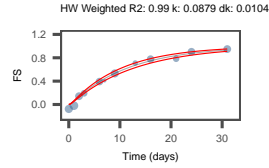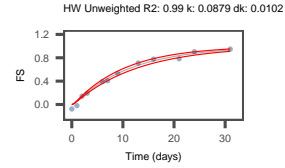

RT4H

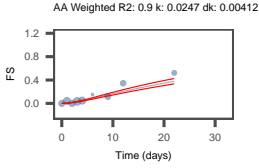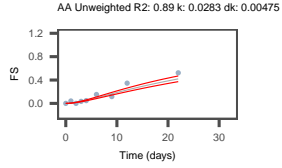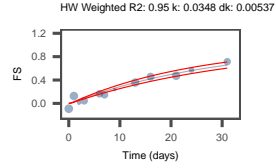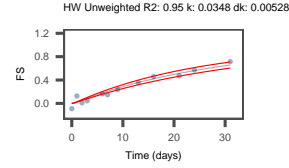

RTN2

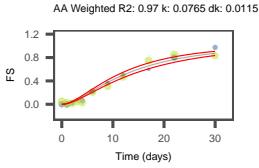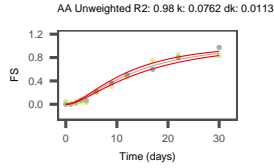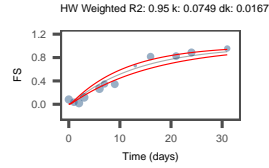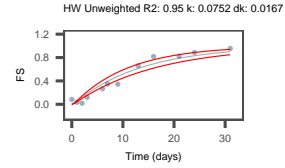

RZR2

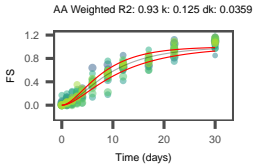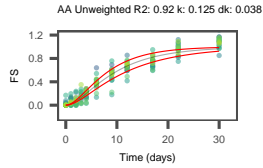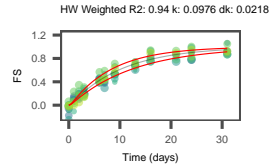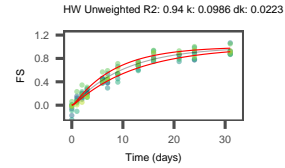

S10A1

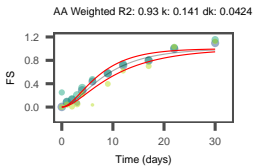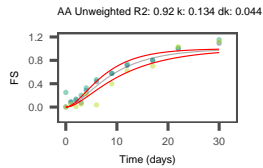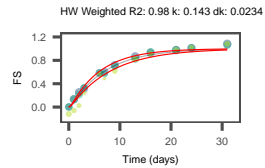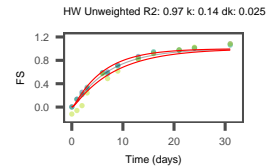

S27A1

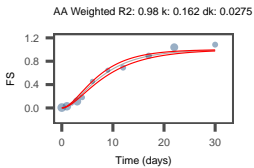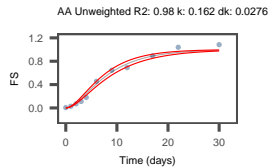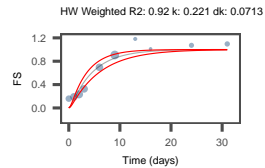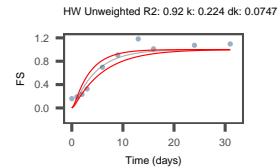

## SAM50

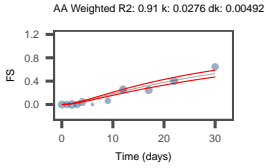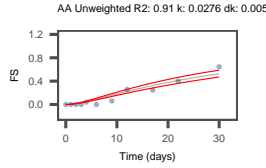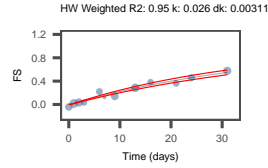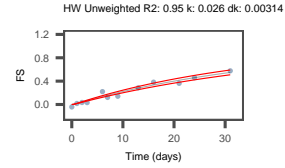

## SAP

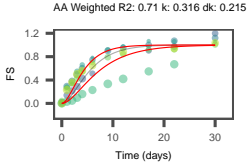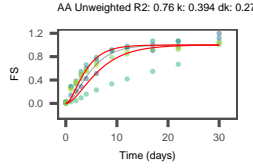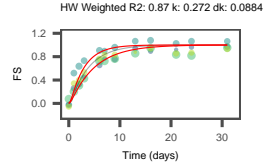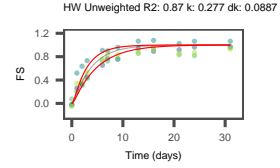

## SBP1

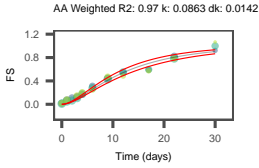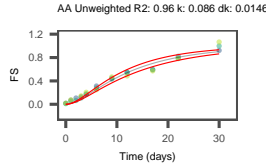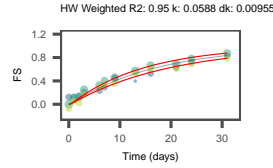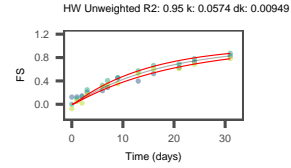

## SCOT1

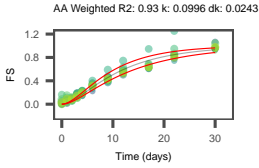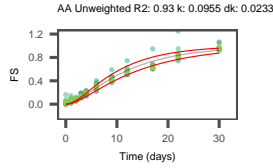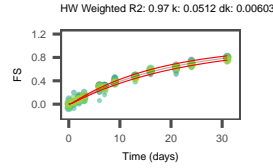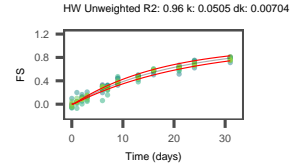

## SCP2

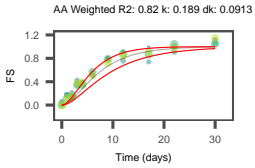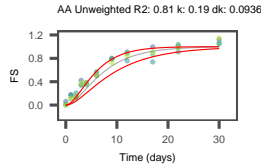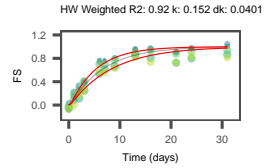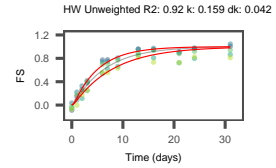

## SDHA

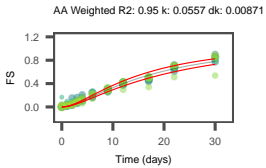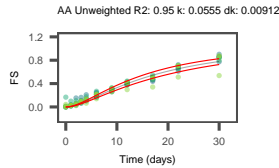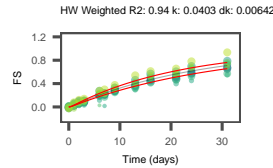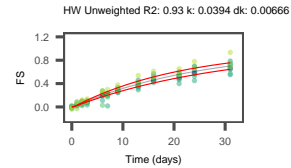



## SDHB

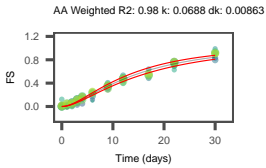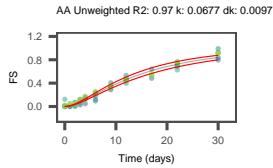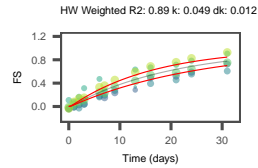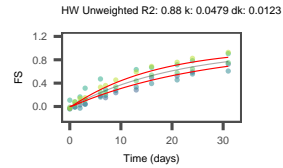

## SERPH

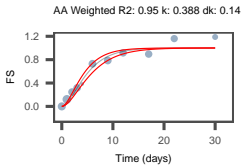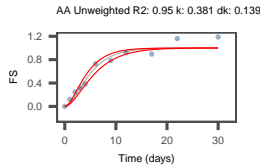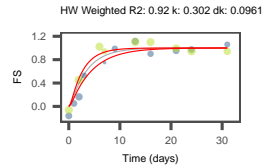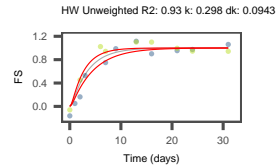

## SGCD

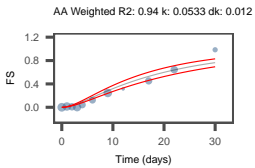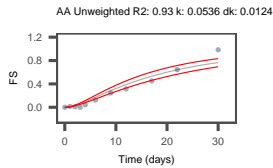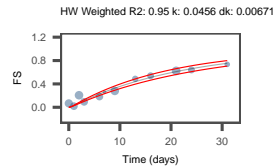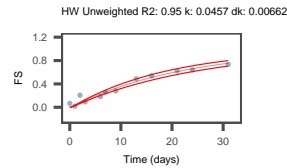

## SH3BG

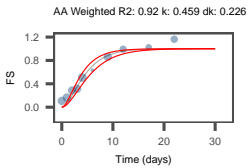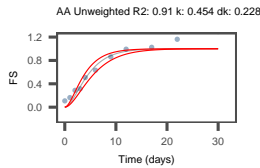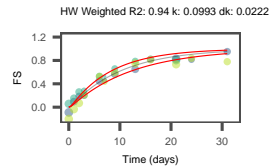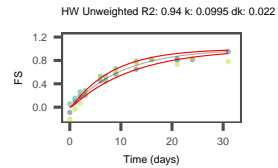

## SMYD1

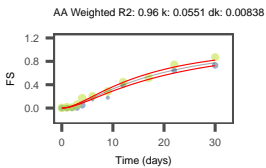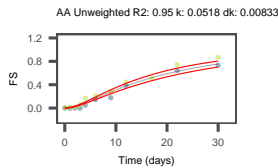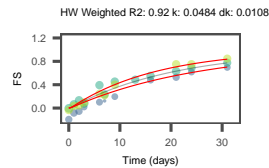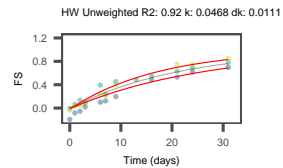

## SODC

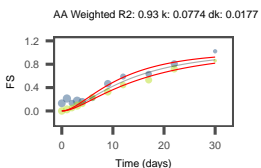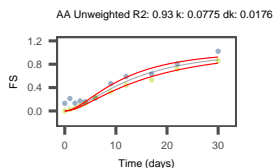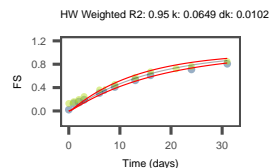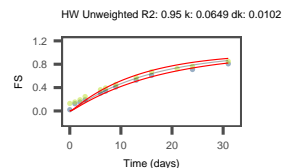

## SODM

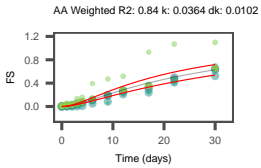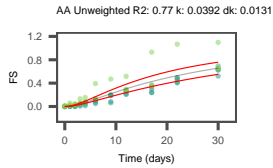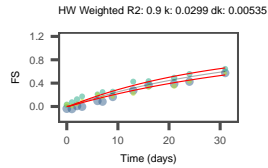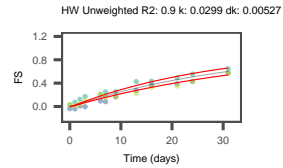

## SPA3K

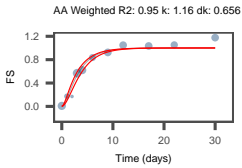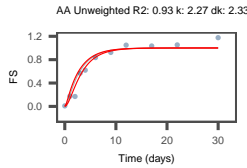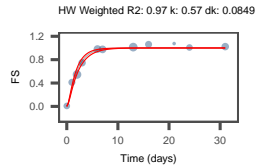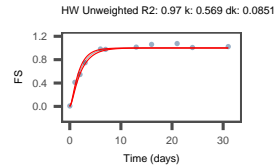

## SPB6

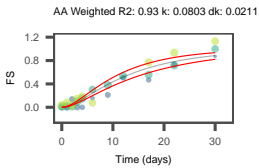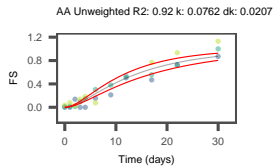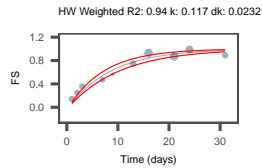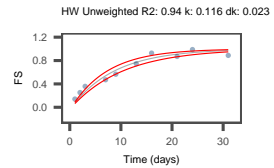

## SPEG

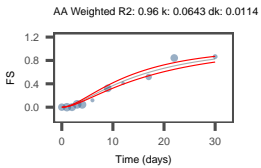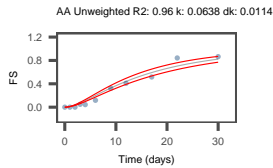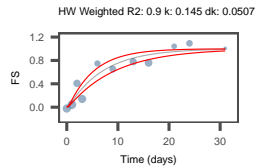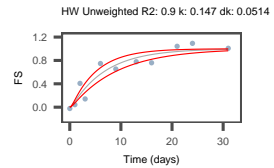

## SPTB2

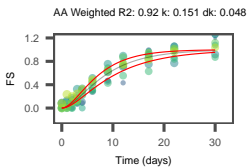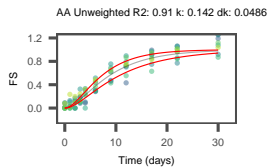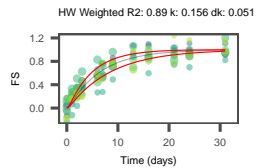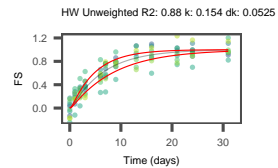

## SPTN1

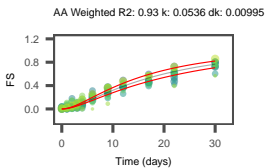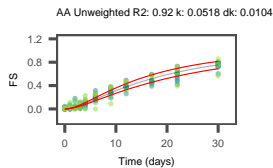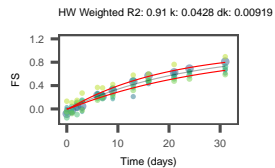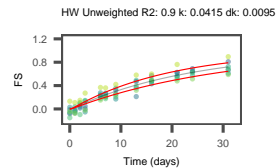

## SRBS1

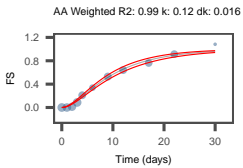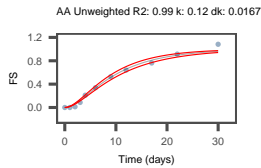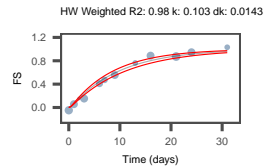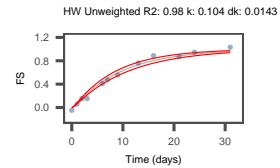

## SRBS2

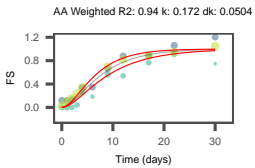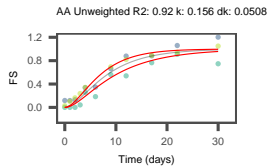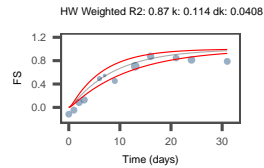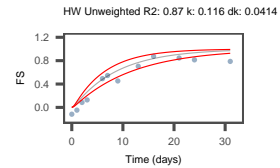

## SRCA

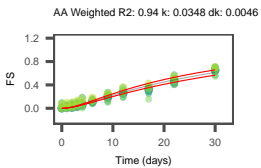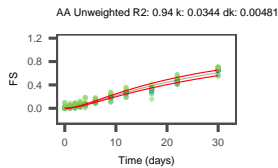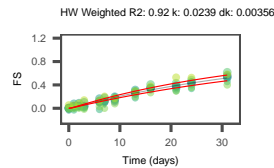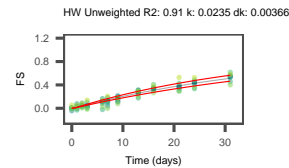

## SUCA

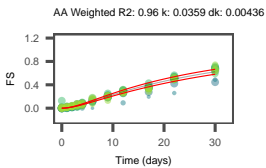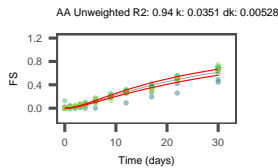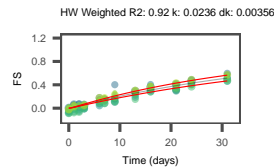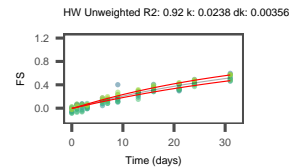

## SUCB1

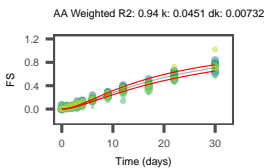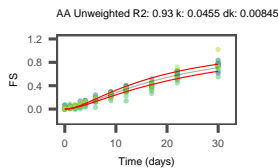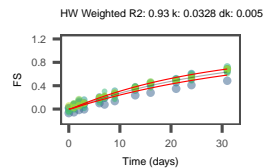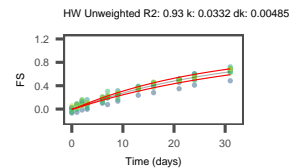

## SUCB2

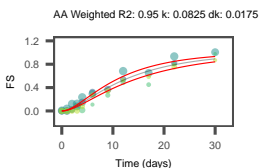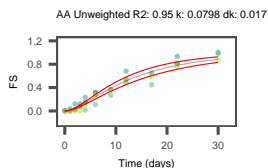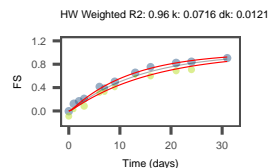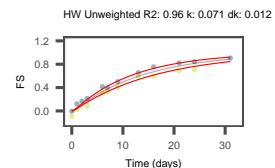

## SYNP2

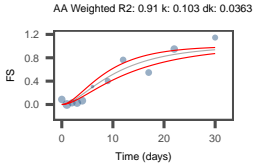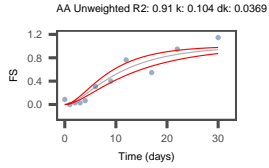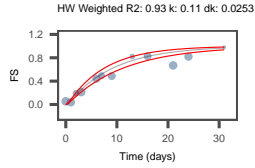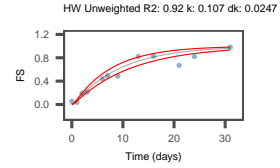

## TADBP

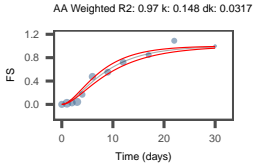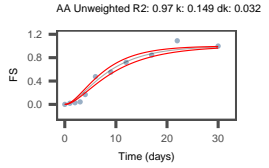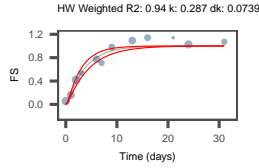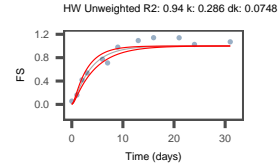

## TALDO

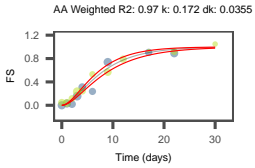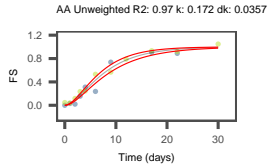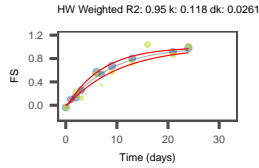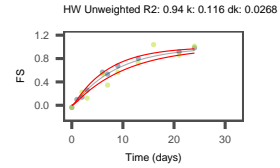

## TBA4A

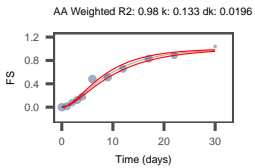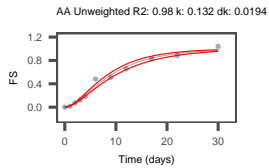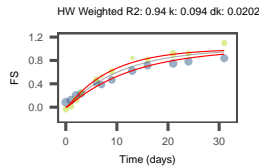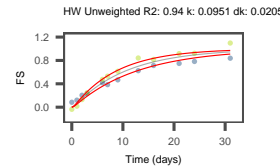

## TBB2A

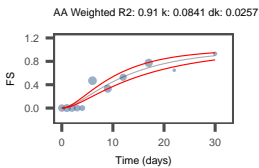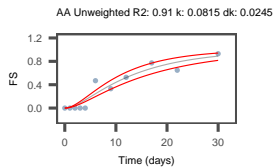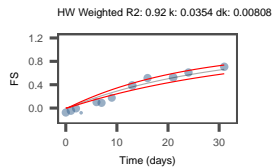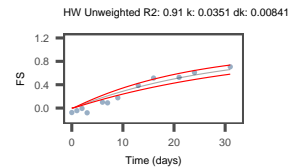

## TBB5

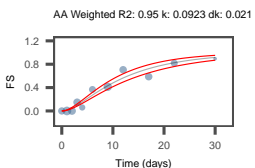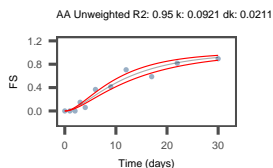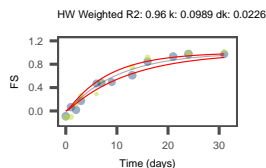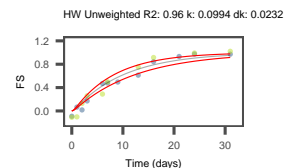

TCPA

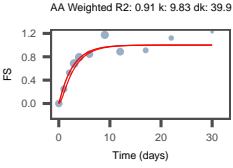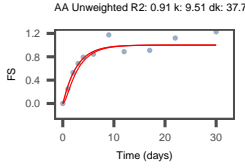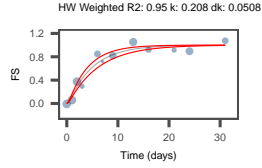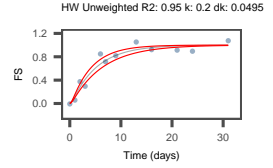

TCPB

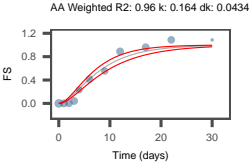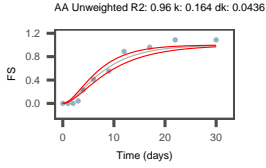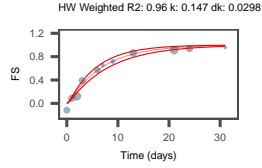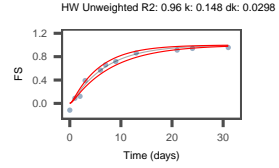

TCPD

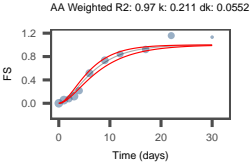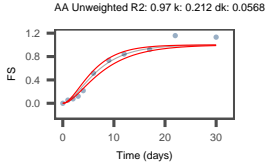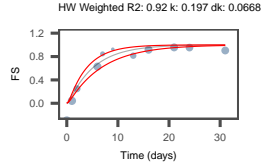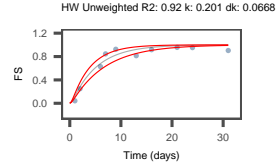

TCPQ

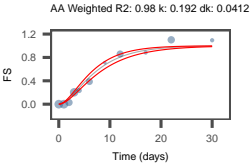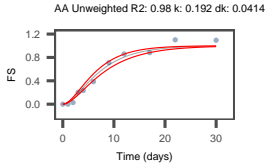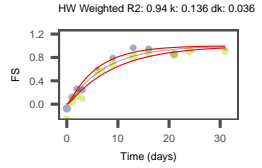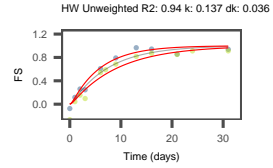

TCTP

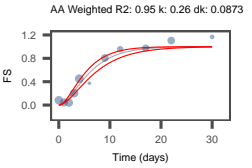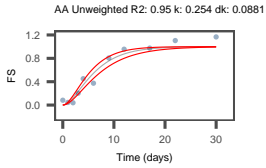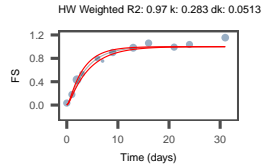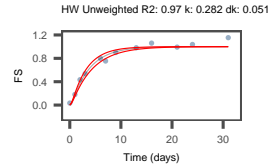

TELT

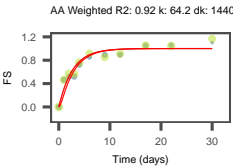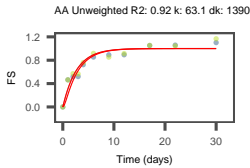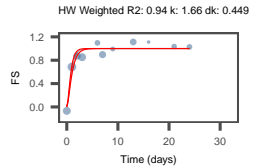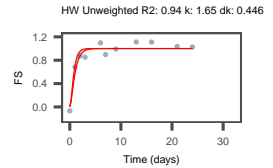

## TERA

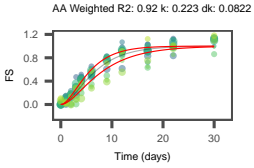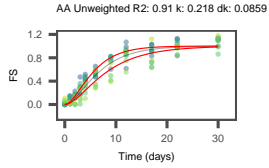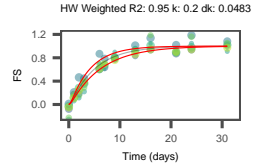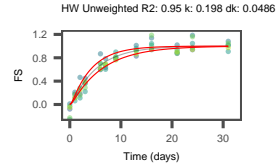

## TGM2

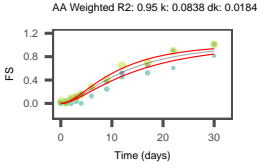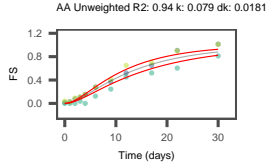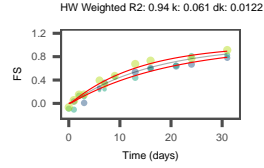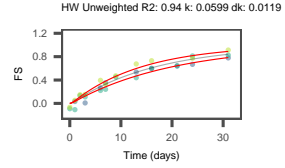

## THIL

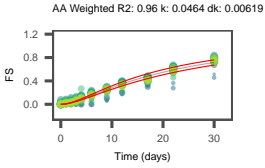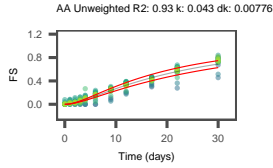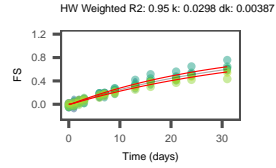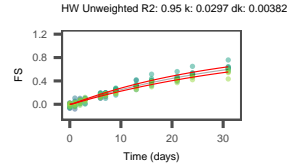

## THIM

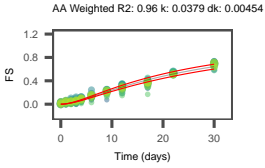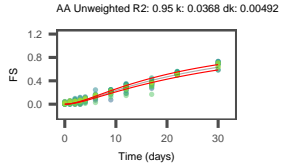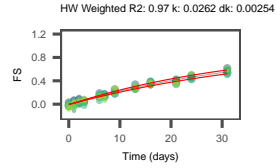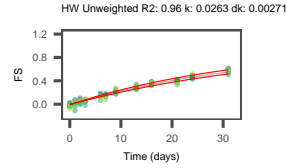

## THIO

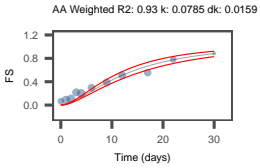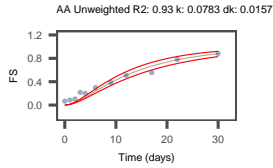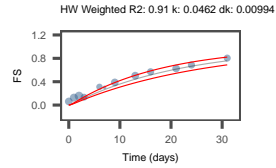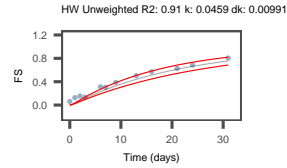

## TIM44

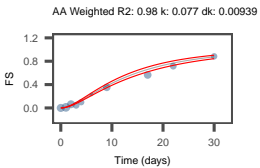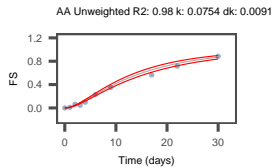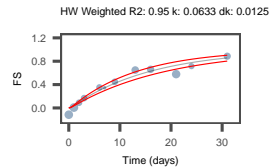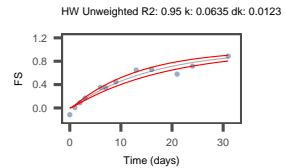

## TIM50

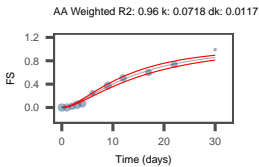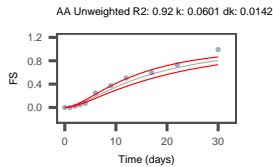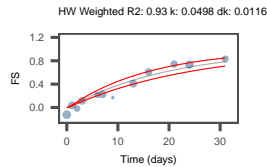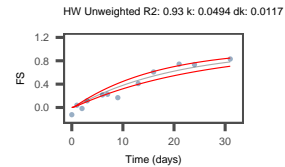

## TITIN

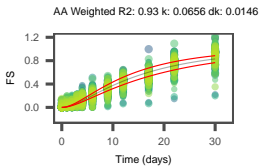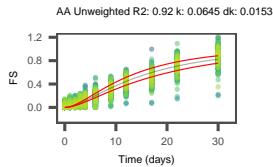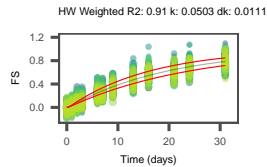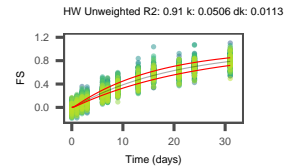

## TLN1

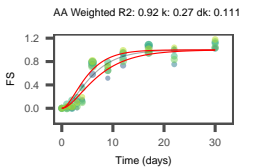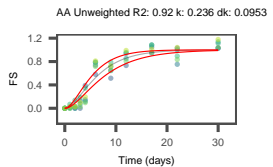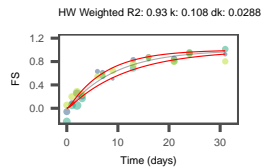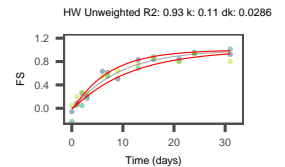

## TMOD1

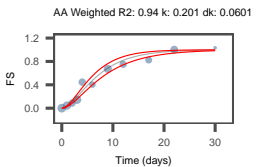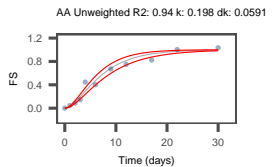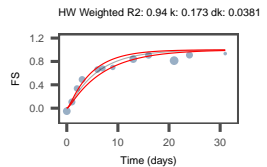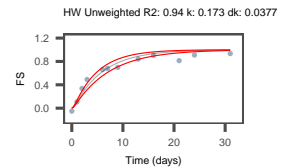

## TNNC1

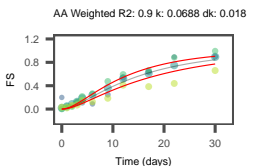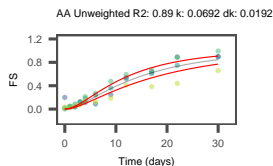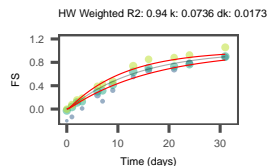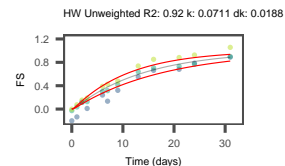

## TNNI3

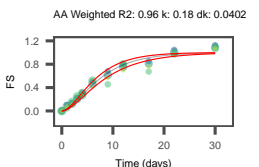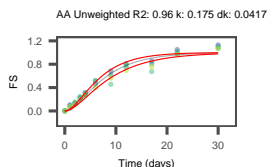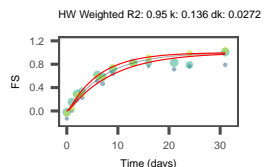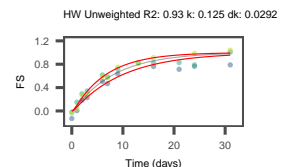

TNNT2

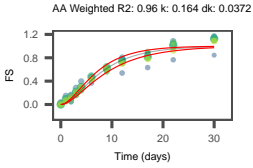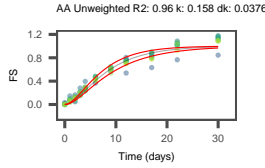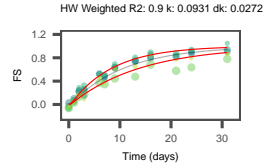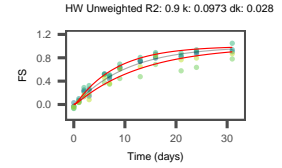

TOM40

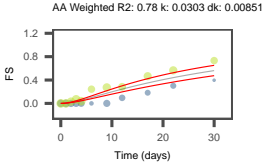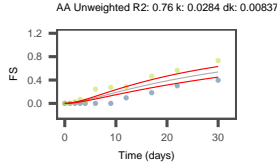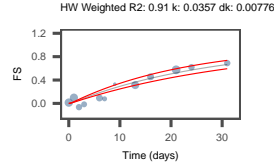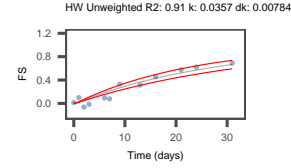

TPIS

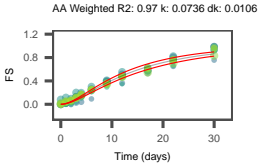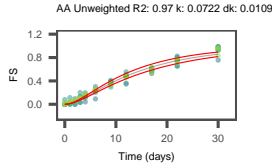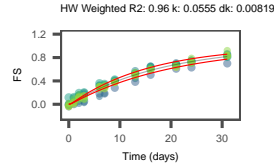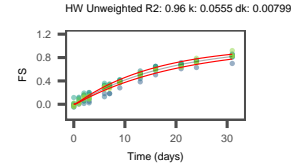

TPM1

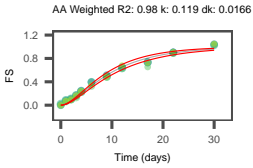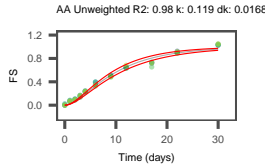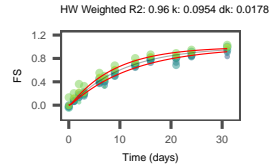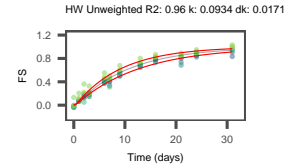

TRFE

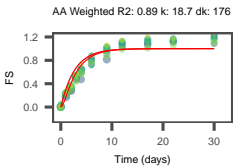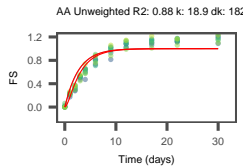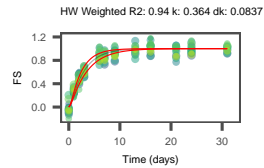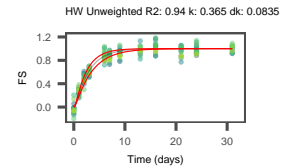

TR172

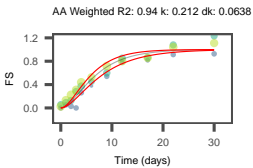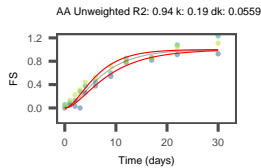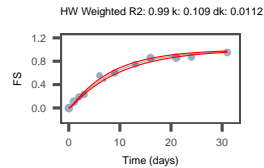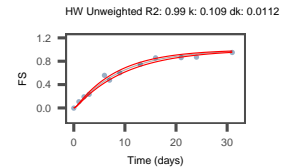



TTHY

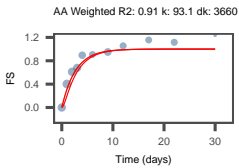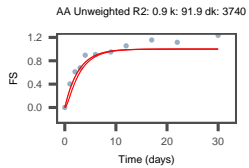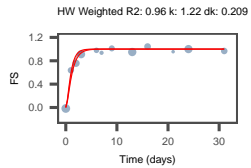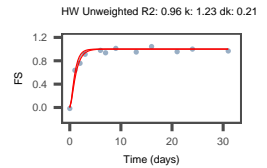

UBA1

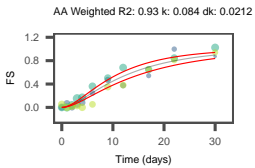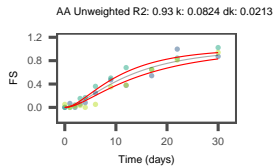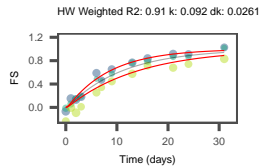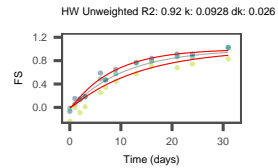

UBE2N

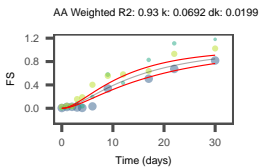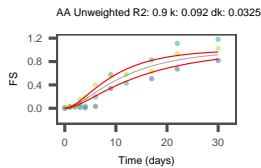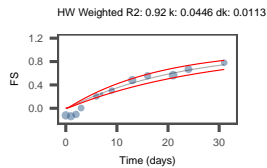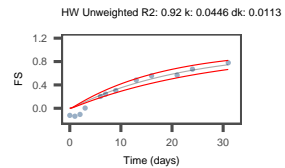

UCRI

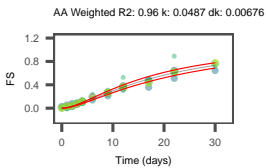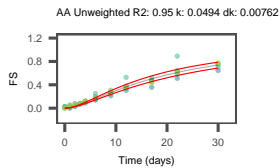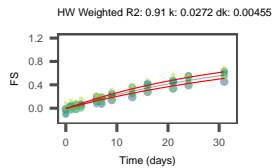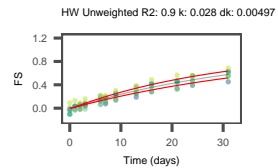

UGPA

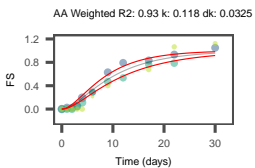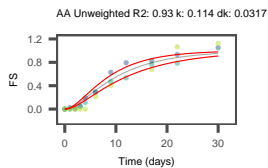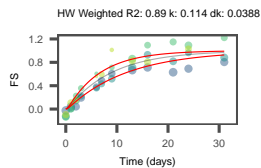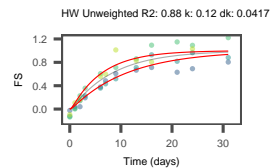

VDAC1

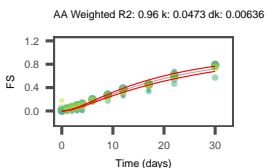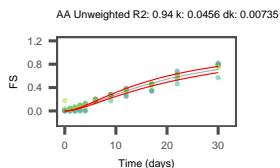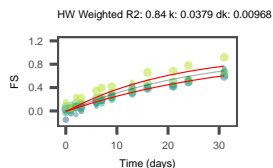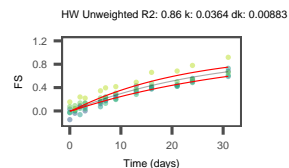

## VDAC2

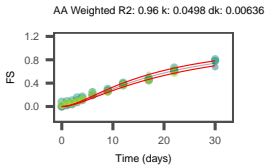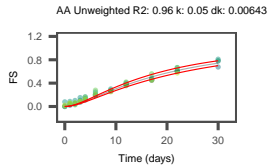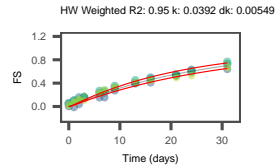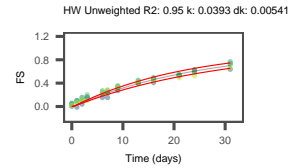

## VDAC3

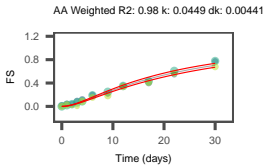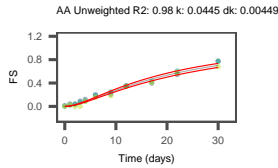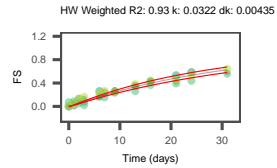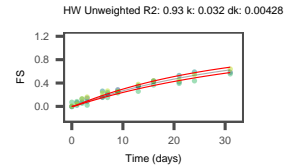

## VIME

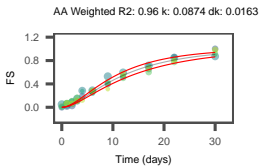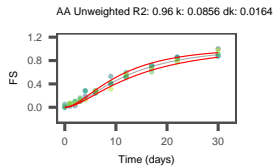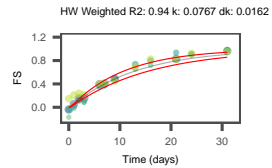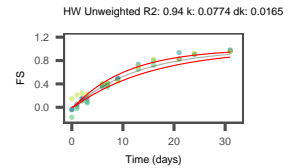

## VINC

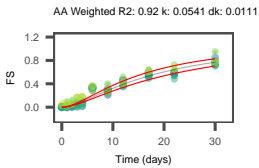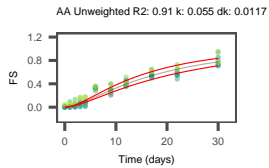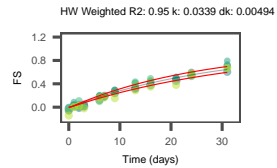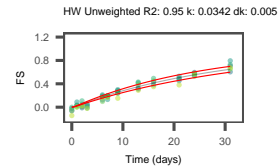

## VWAB

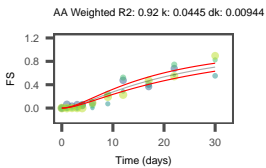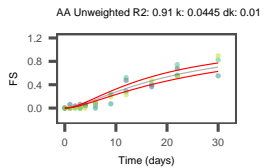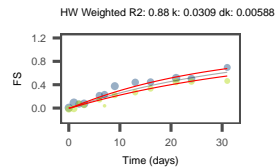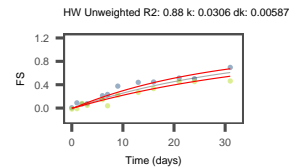

## WDR1

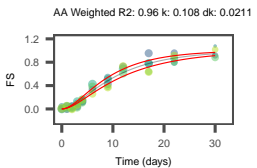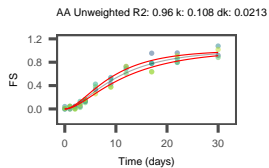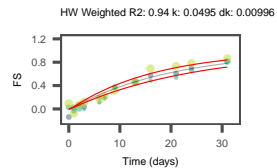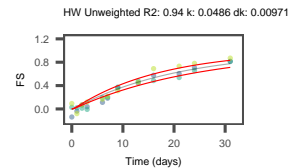

Supplement: mmc7.pdf [file mmc7.pdf]
