# Supplementary material for: Harmonizing Labeling and Analytical Strategies to Obtain Protein Turnover Rates in Intact Adult Animals
Source: PubMed Central journal article supplement (PMC9249856; doi:10.1016/j.mcpro.2022.100252), 2022-05-28

1433B

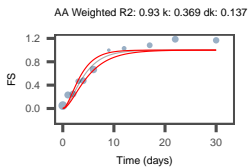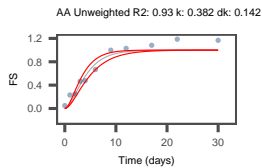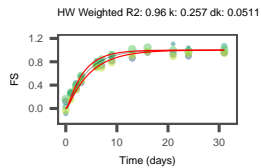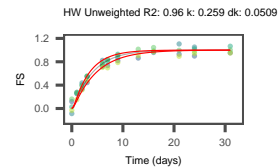

1433E

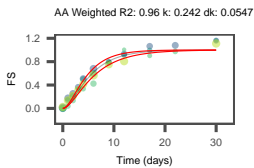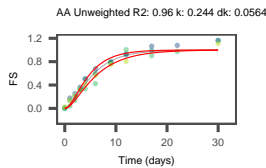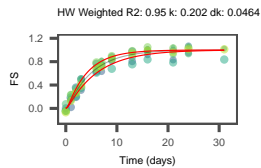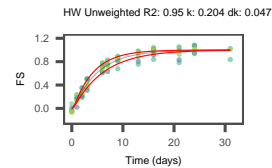

1433G

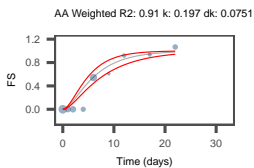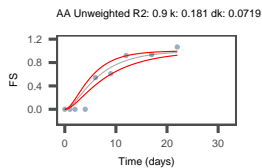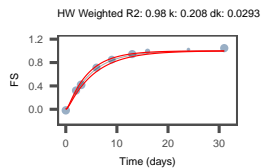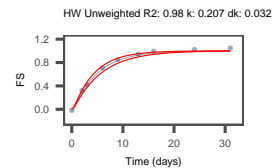

1433T

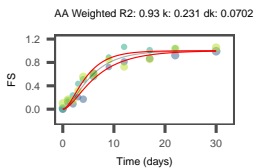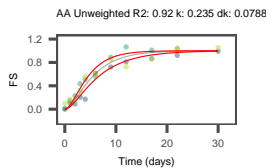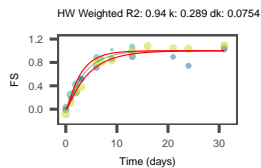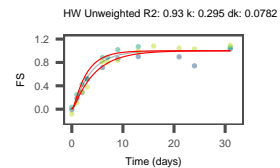

1433Z

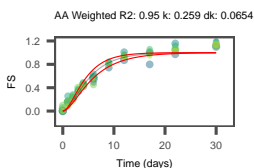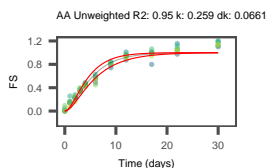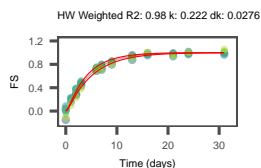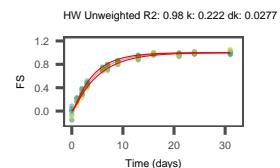

2AAA

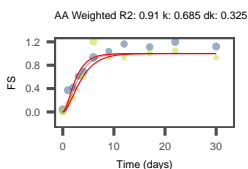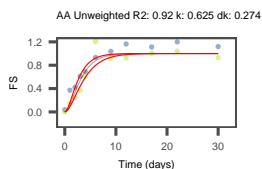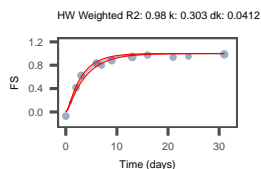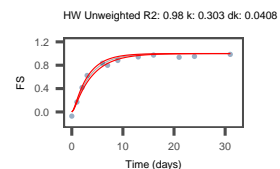

## 3BHS4

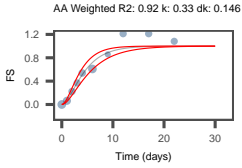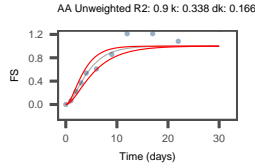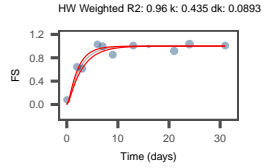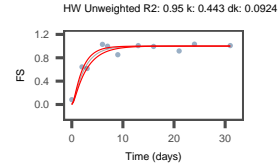

## 3H1DH

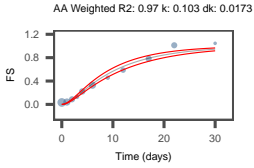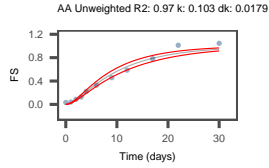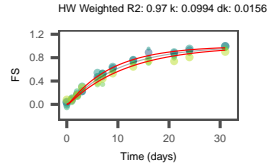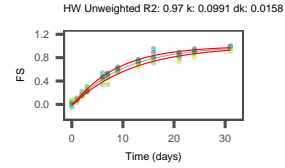

## 4F2

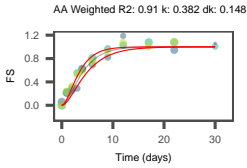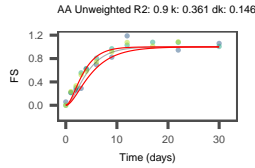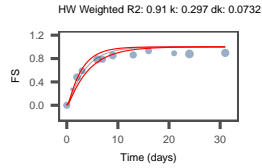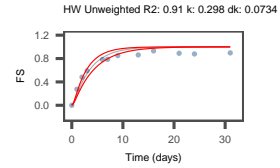

## 6PGD

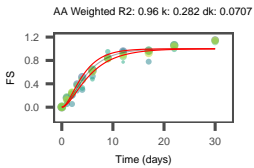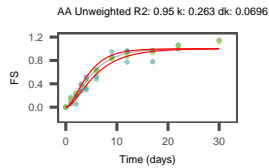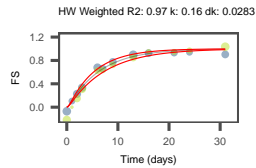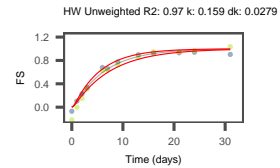

## 6PGL

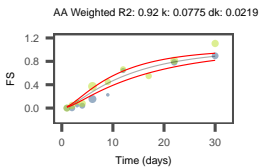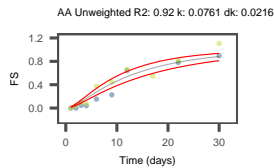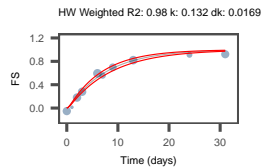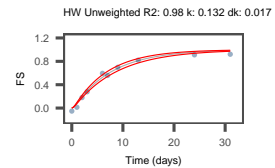

## AADAT

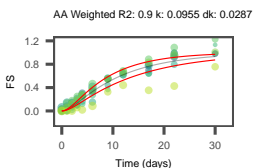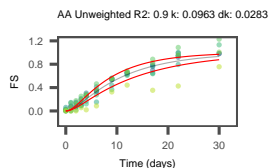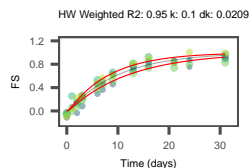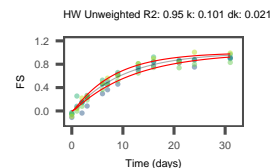

## AASS

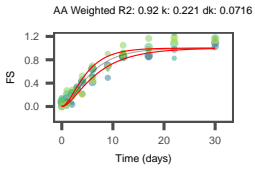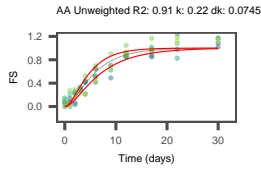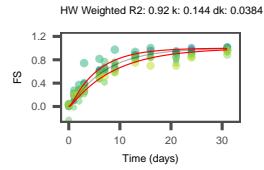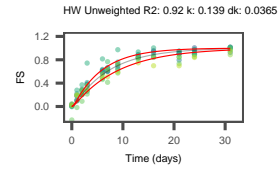

## AATC

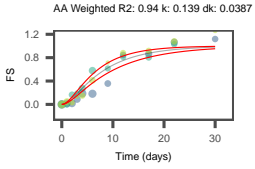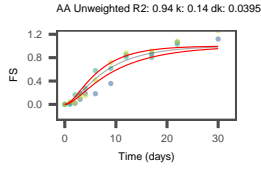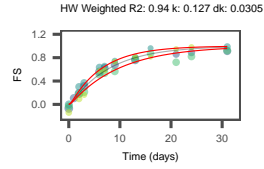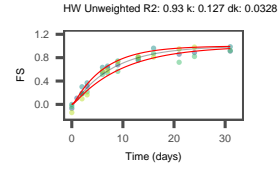

## AATM

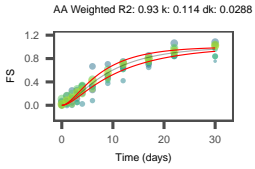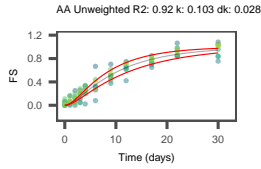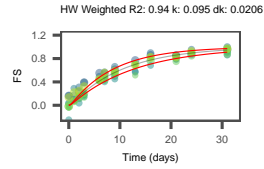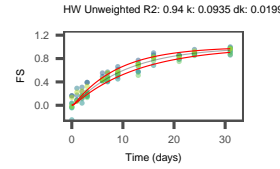

## ABCB7

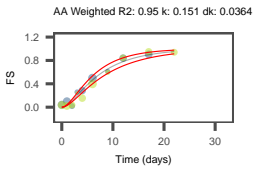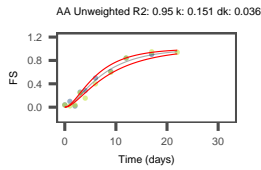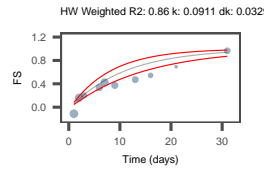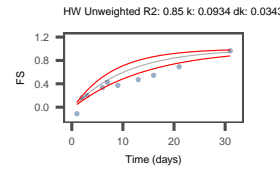

## ABCD3

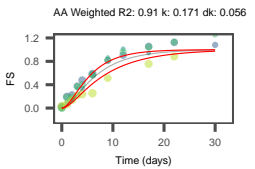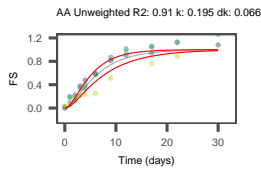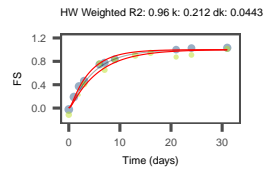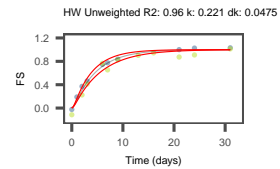

## ABCG2

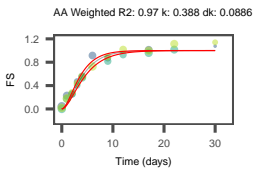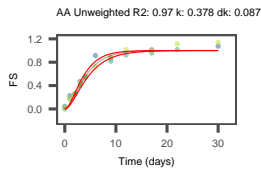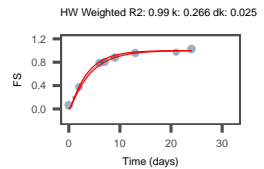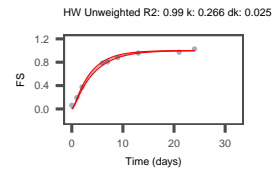

## ABHDB

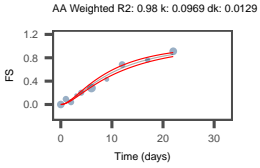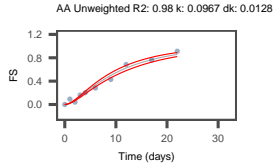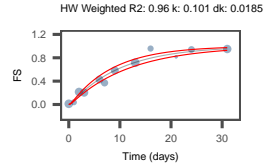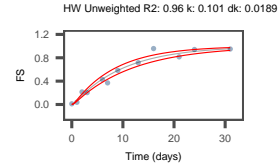

## ABHEB

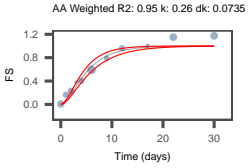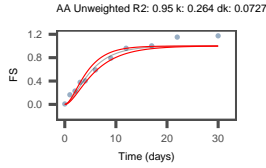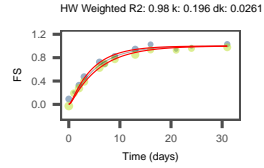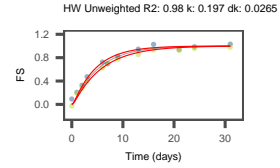

## ACADL

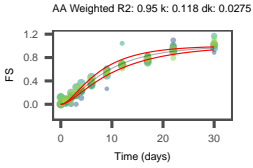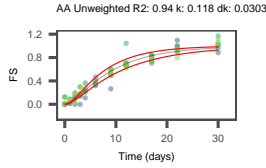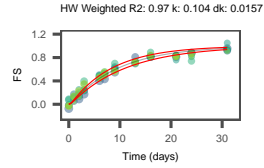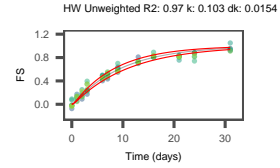

## ACADM

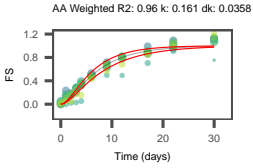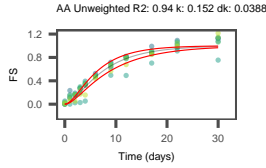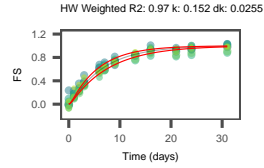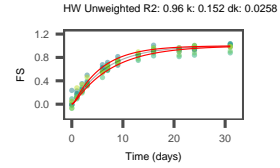

## ACADS

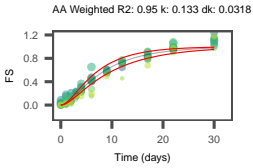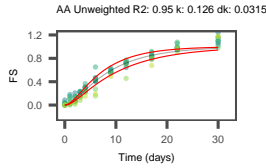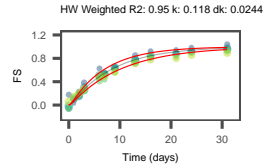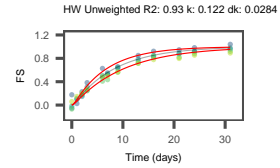

## ACADV

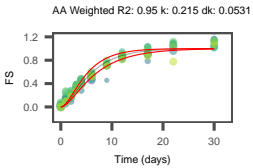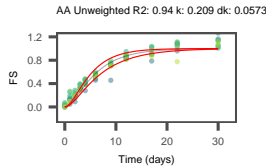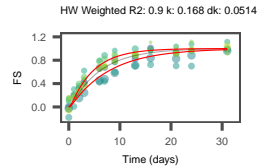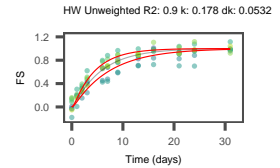



## ACBP

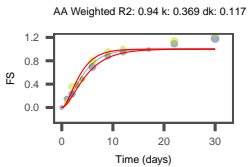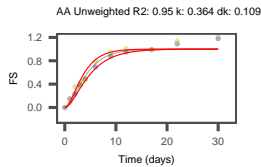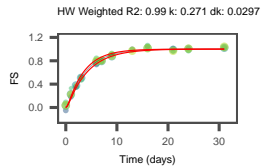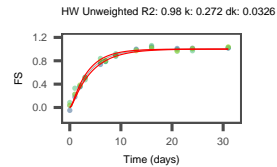

## ACD10

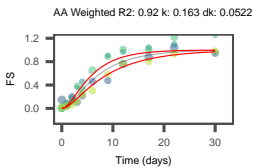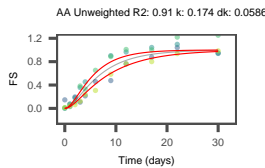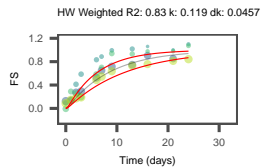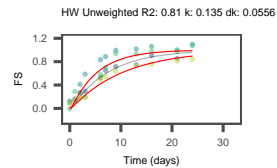

## ACD11

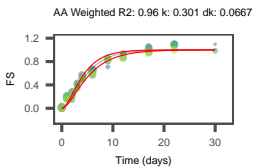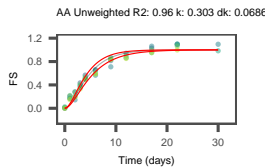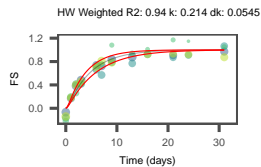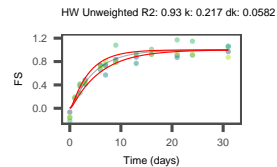

## ACDSB

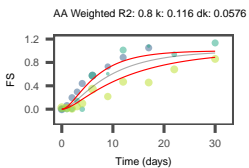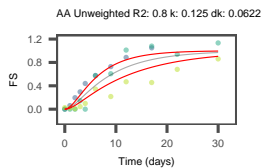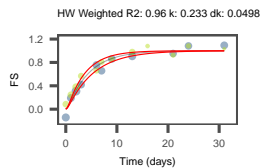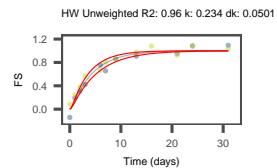

## ACLY

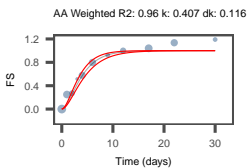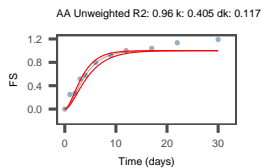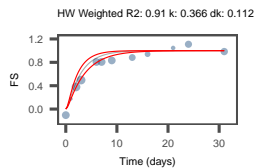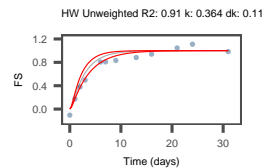

## ACO12

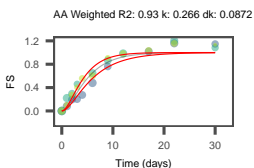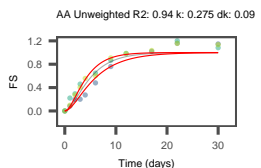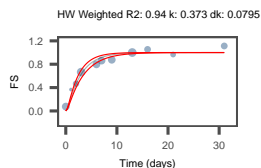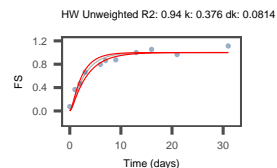

## AC013

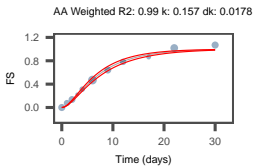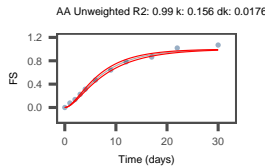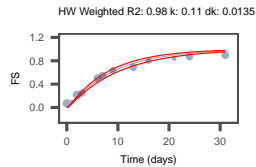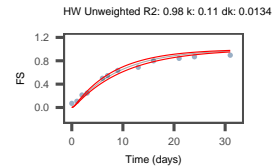

## AC0C

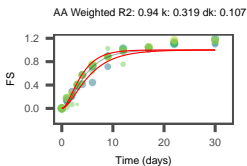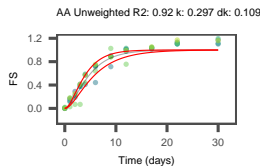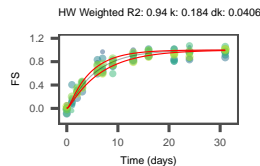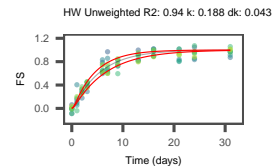

## AC0N

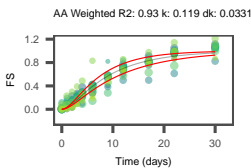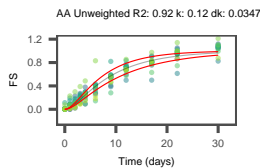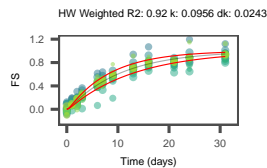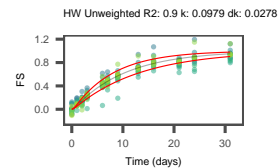

## AC0T9

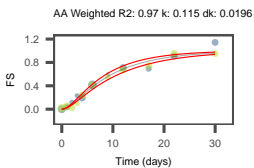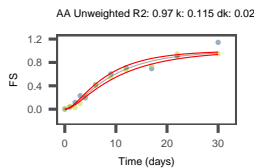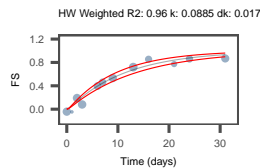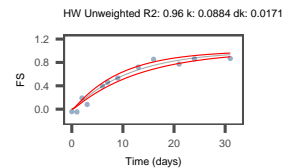

## AC0X1

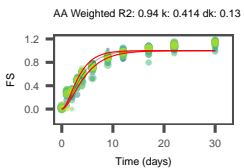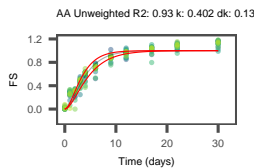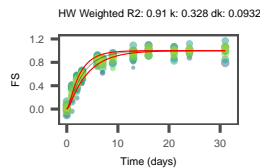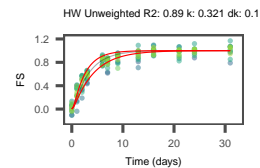

## AC0X3

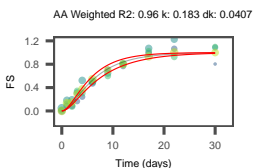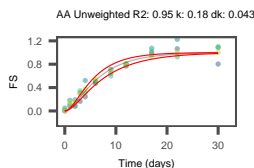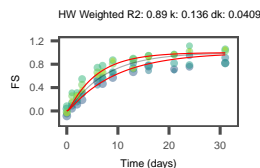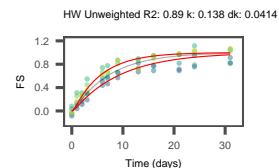

## ACPM

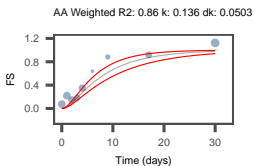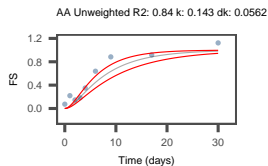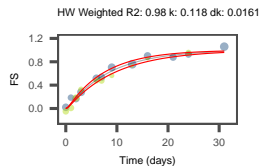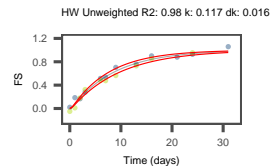

## ACSA

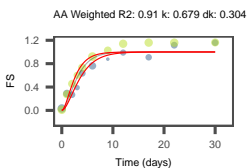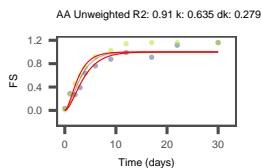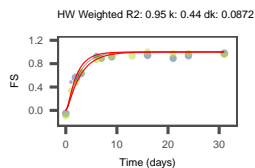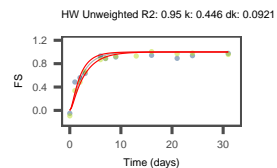

## ACSM1

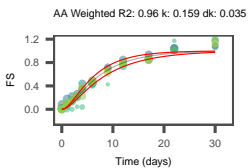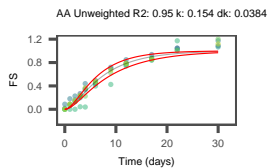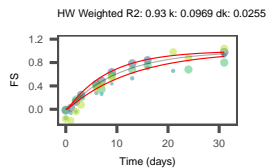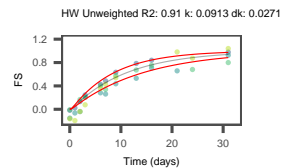

## ACSM2

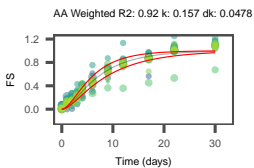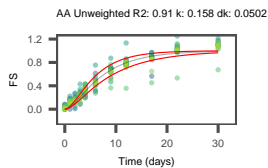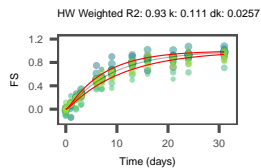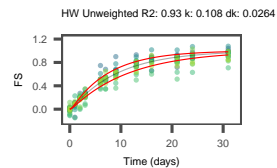

## ACSM3

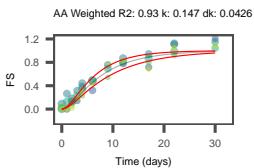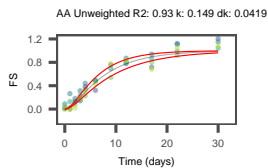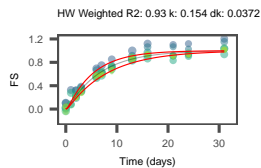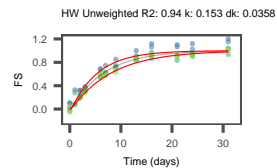

## ACTN1

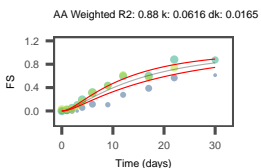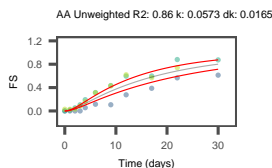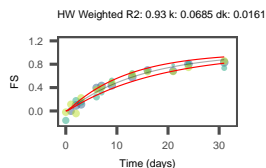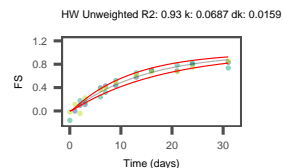

## ACTN4

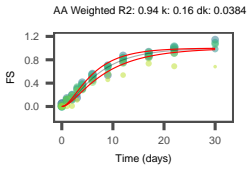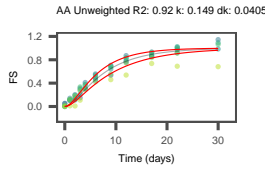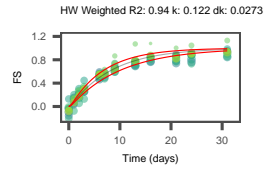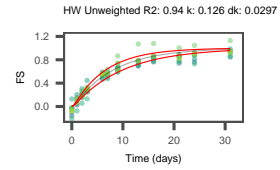

## ACY2

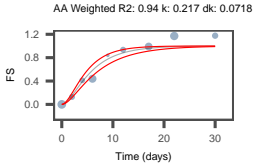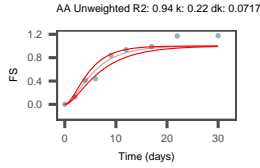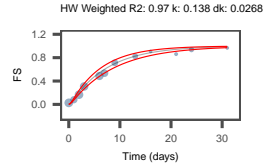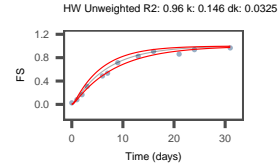

## ACY3

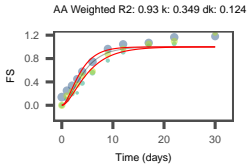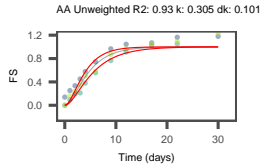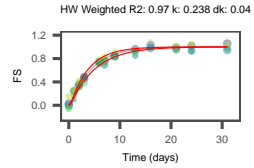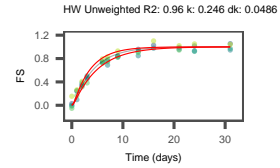

## ADH1

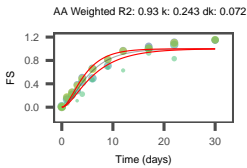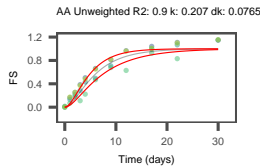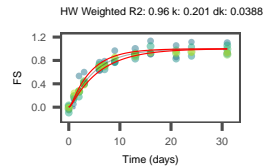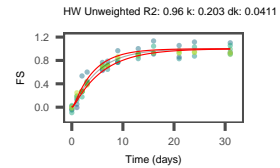

## ADK

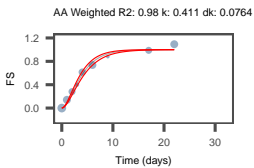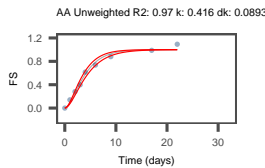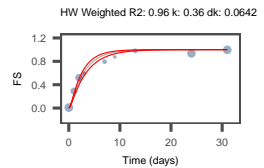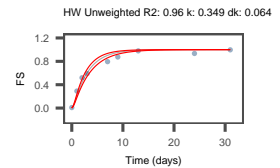

## ADT1

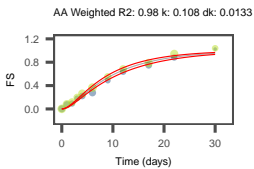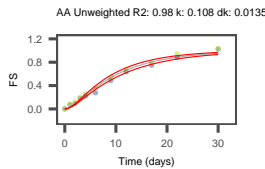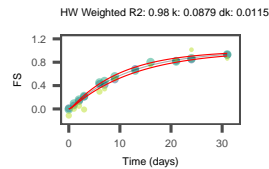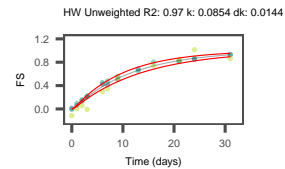

## ADT2

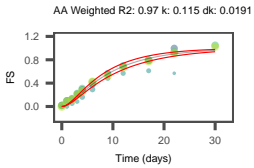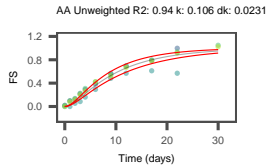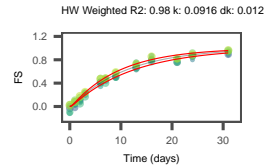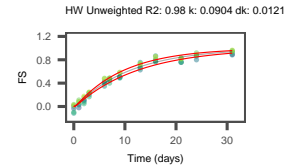

## AFG1L

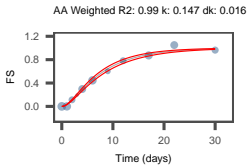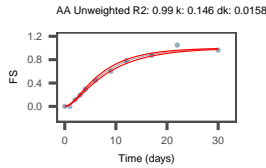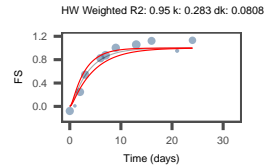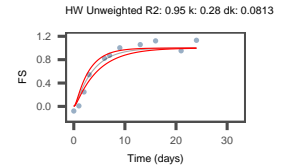

## AGT2

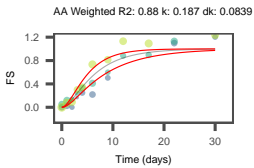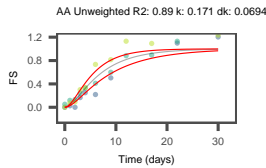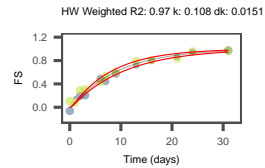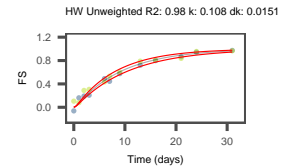

## AIFM1

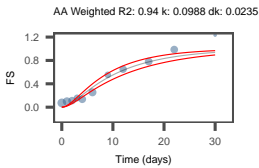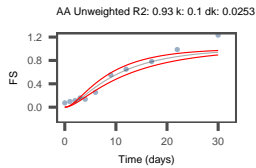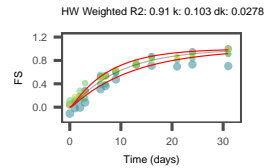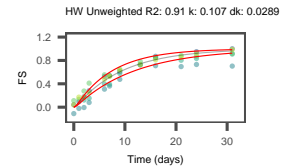

## AK1A1

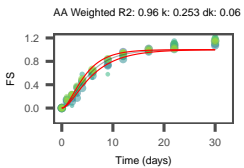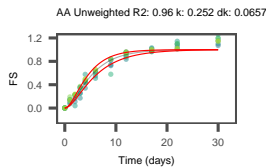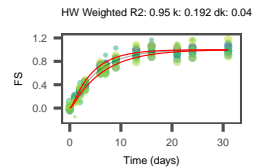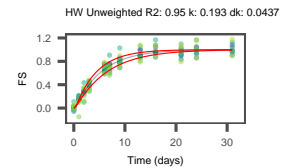

## AK1CL

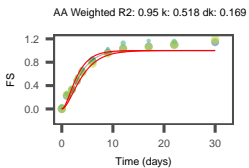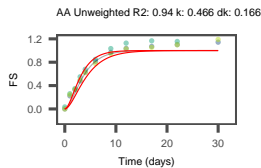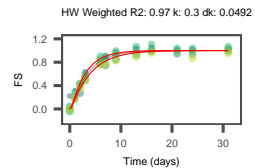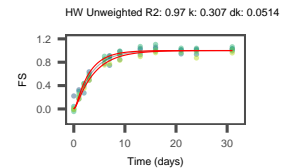

AL1L1

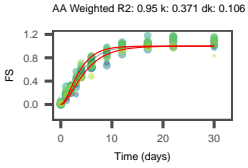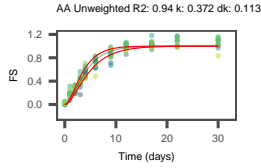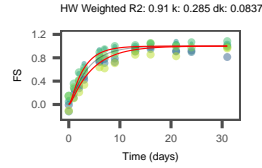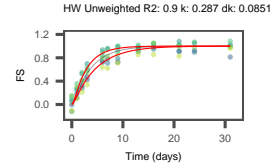

AL3A2

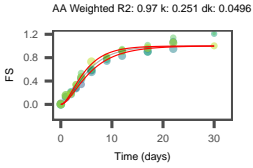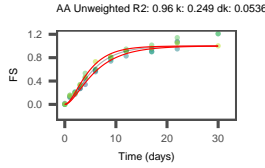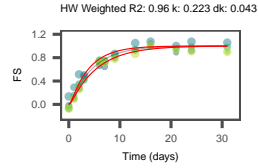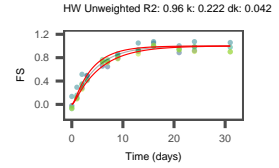

AL4A1

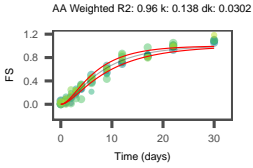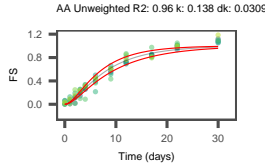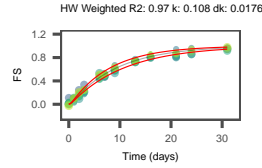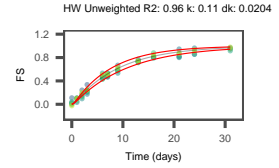

AL7A1

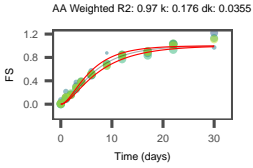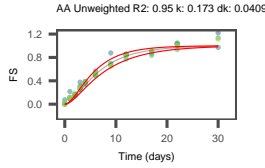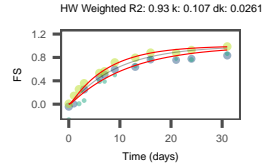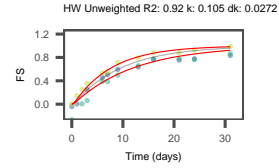

AL8A1

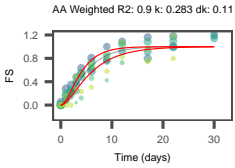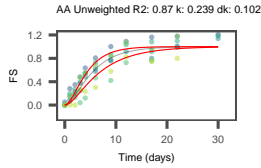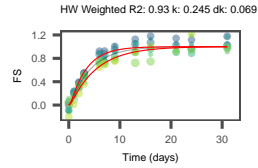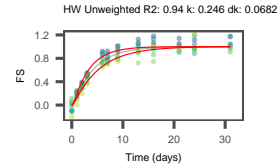

AL9A1

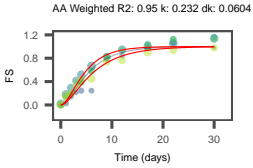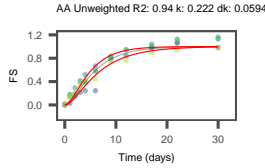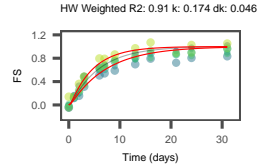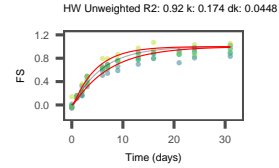

## ALBU

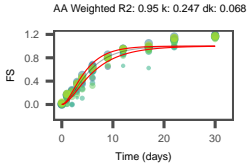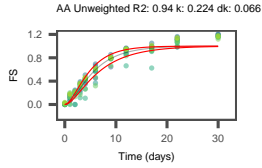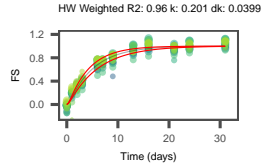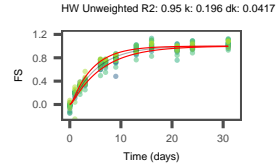

## ALDH2

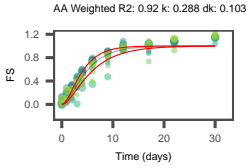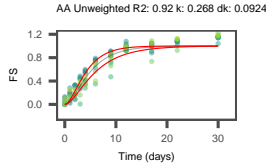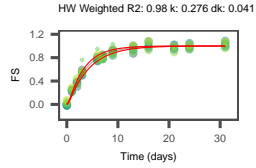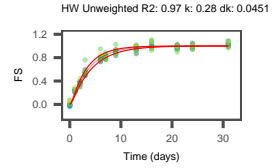

## ALDOA

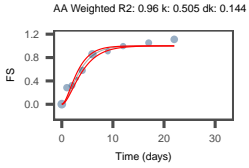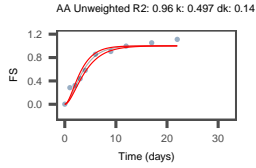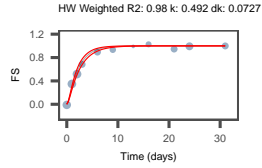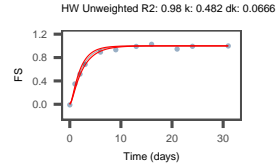

## ALDOB

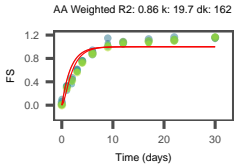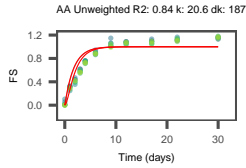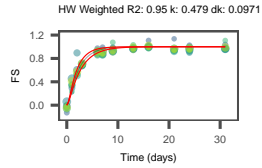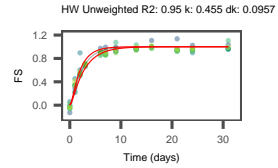

## AMACR

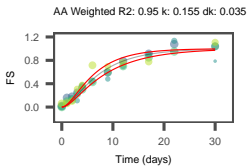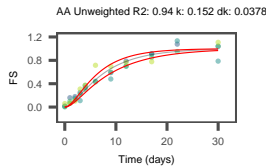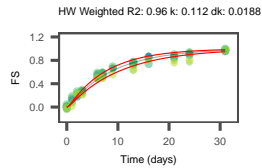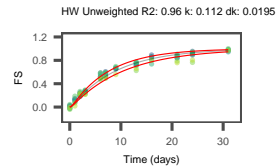

## AMPE

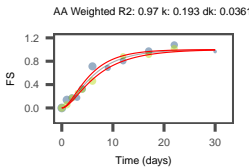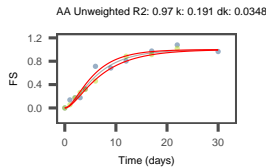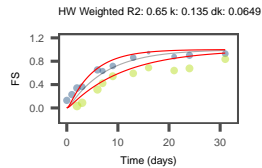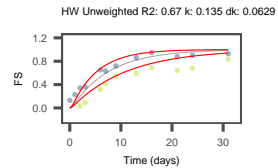

AMPL

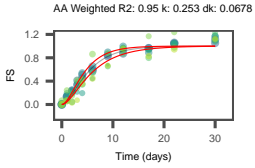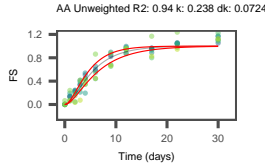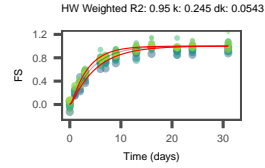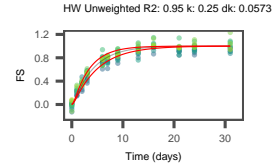

AMPN

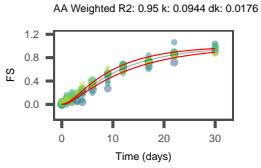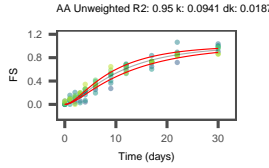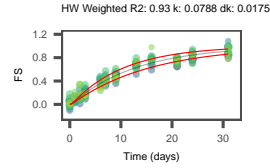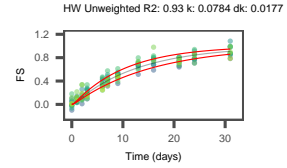

ANXA1

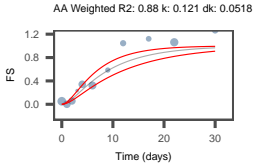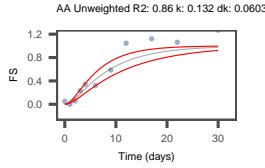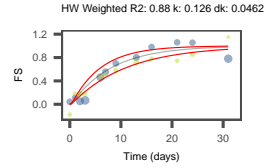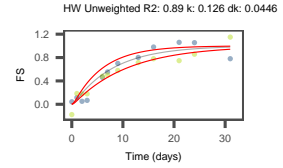

ANXA2

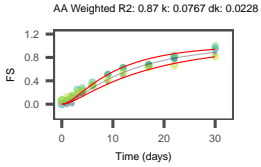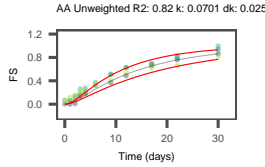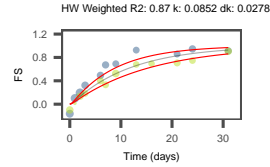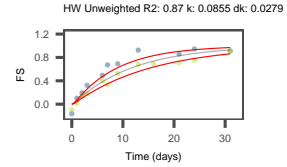

ANXA5

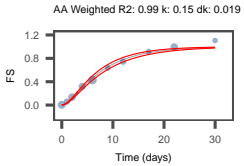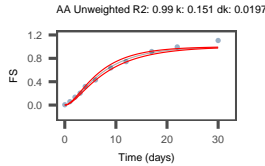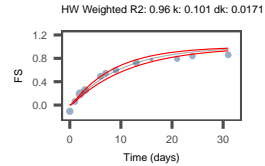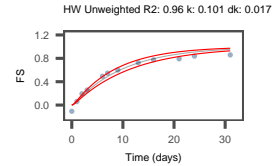

AP1B1

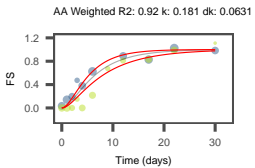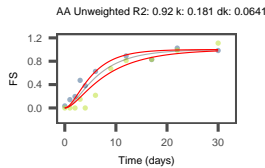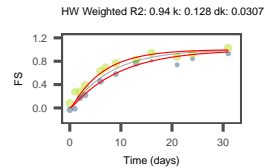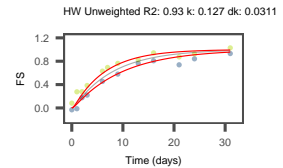



## AP1G1

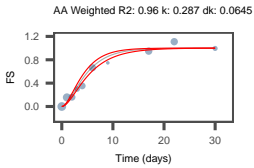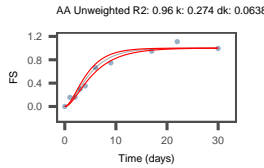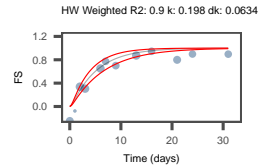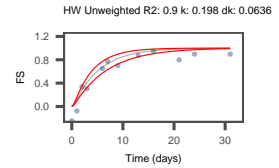

## AP2A2

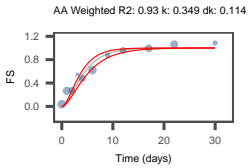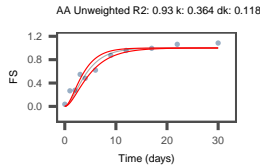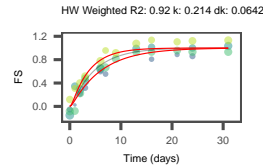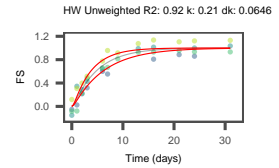

## AP2B1

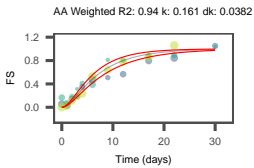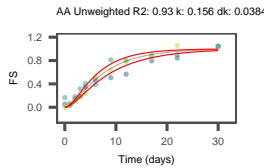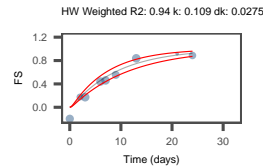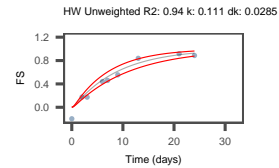

## AP2M1

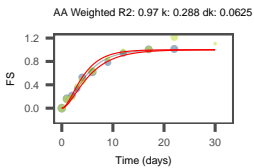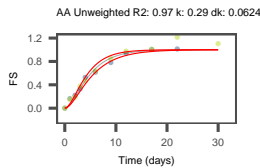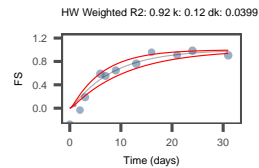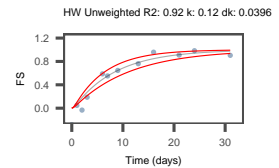

## APOA1

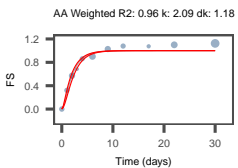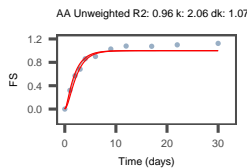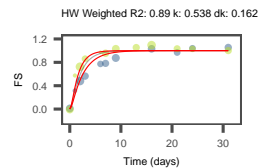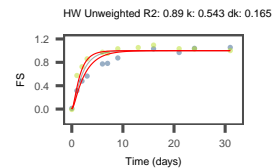

## ARC1A

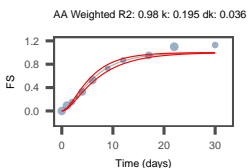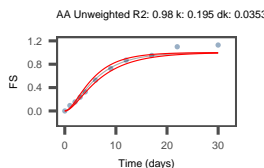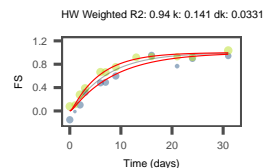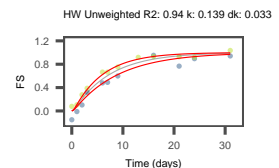

## ARLY

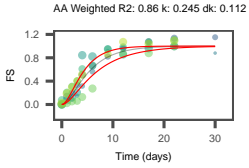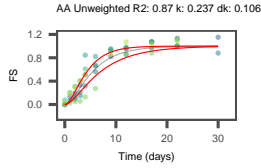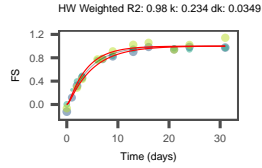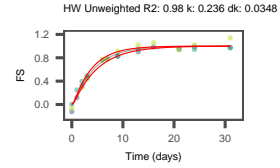

## ARP2

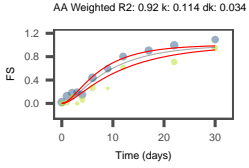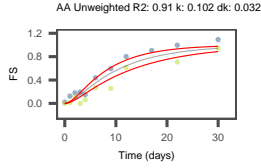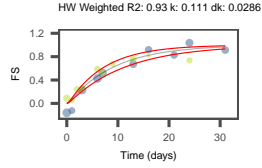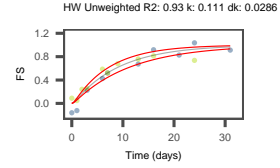

## ARPC4

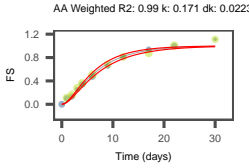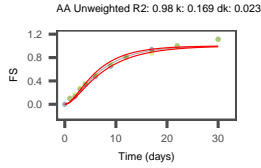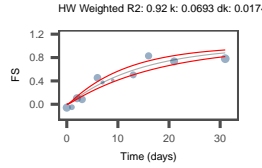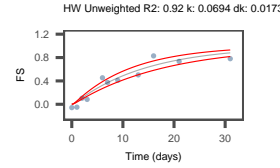

## ASSY

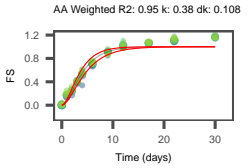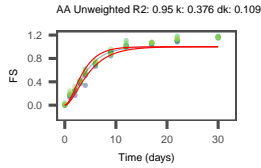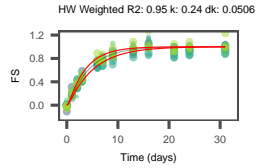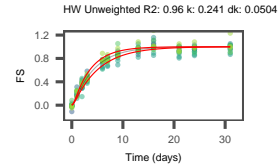

## AT1A1

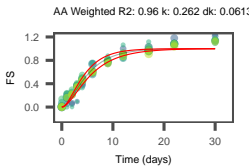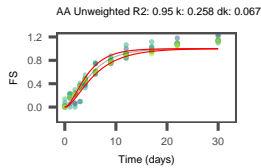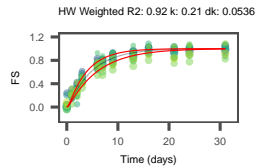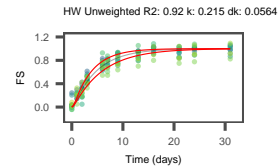

## AT1B1

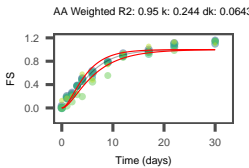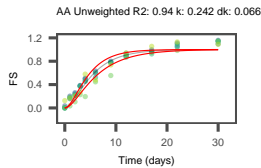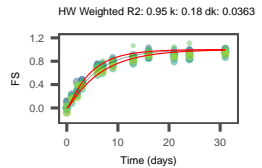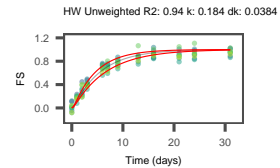

## AT2A2

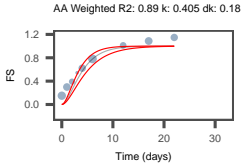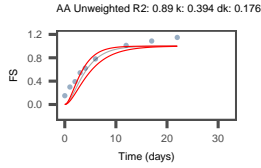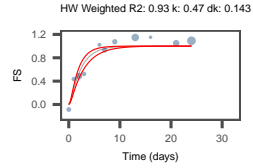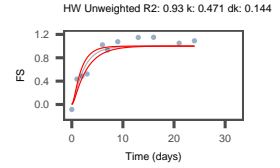

## AT5F1

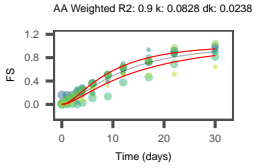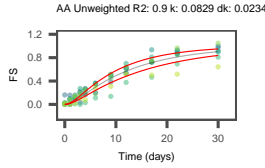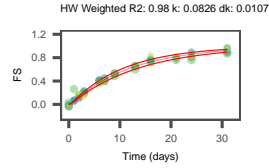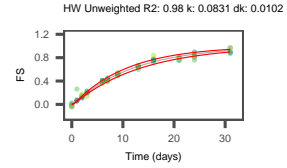

## ATNG

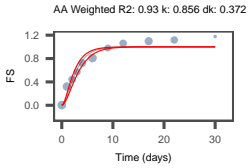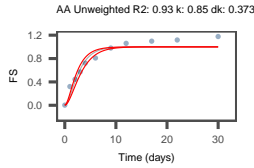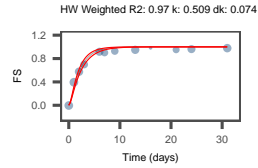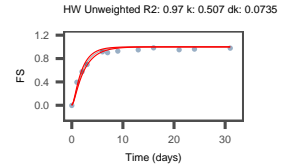

## ATP5H

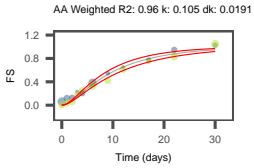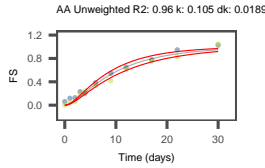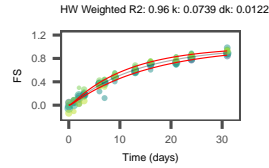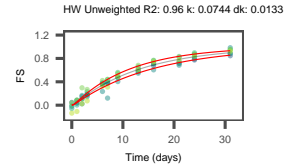

## ATP5I

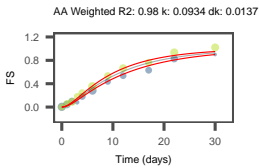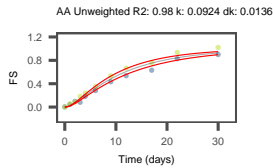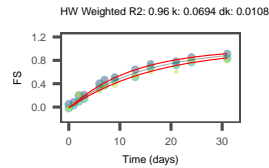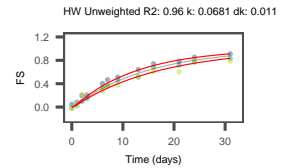

## ATP5L

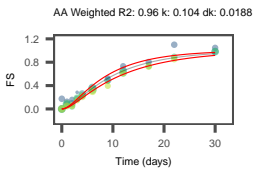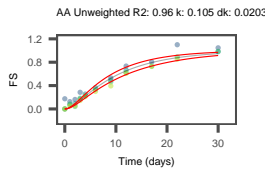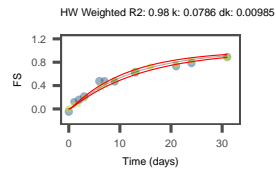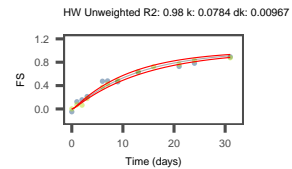

## ATPA

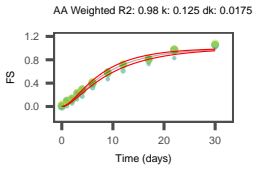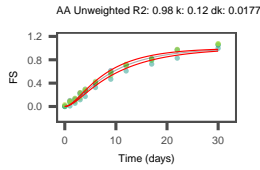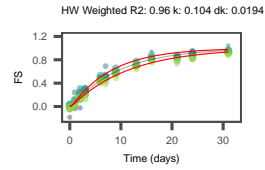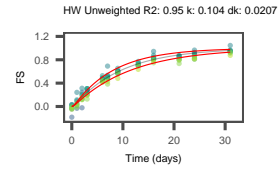

## ATPB

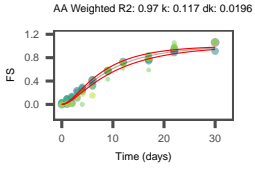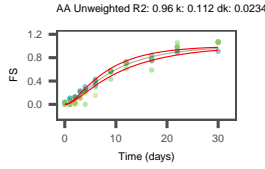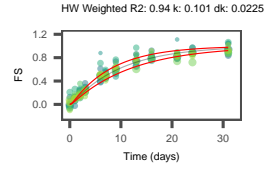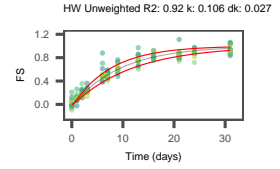

## ATPD

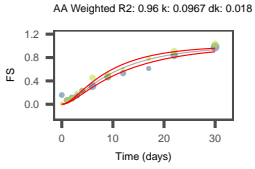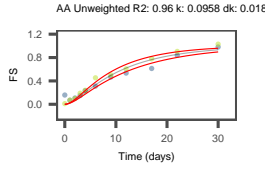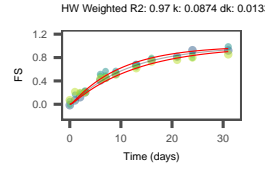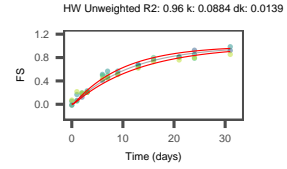

## ATPG

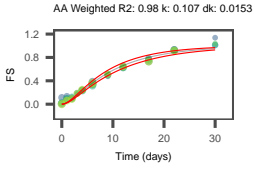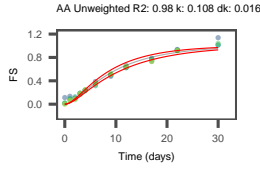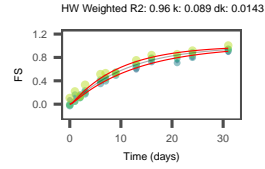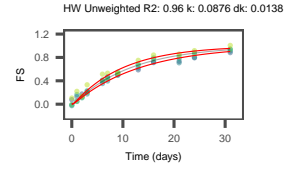

## ATPO

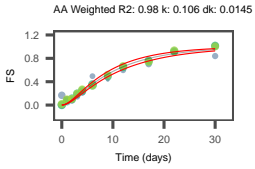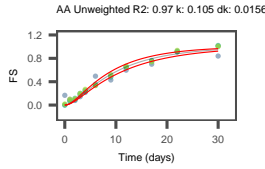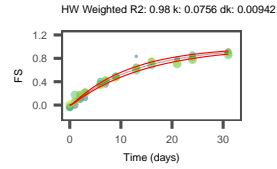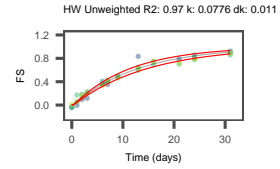

## AUHM

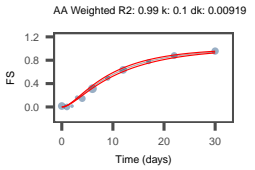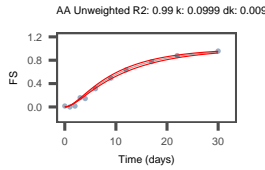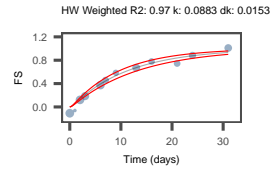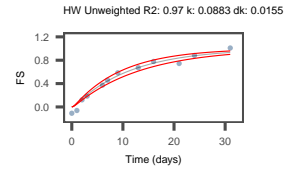

**B3AT**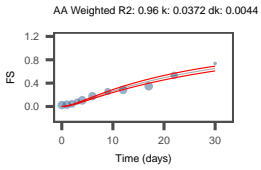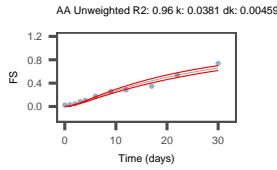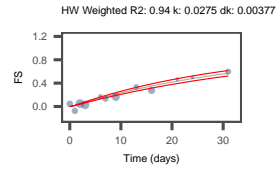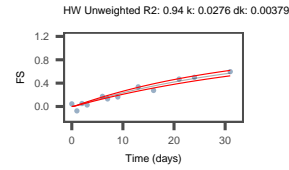**BAP31**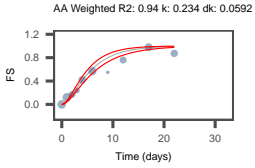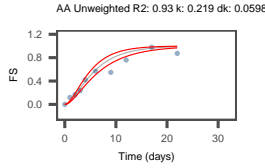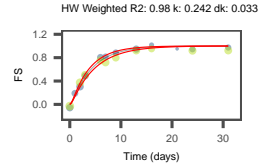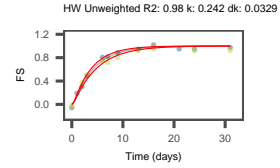**BASI**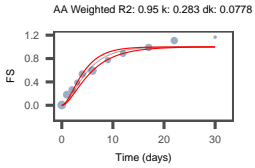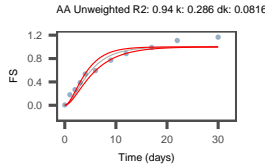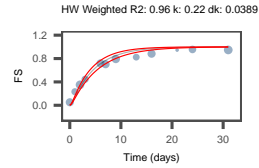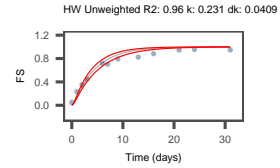**BCAT2**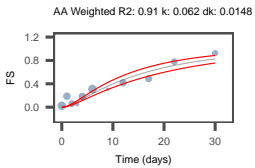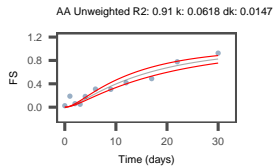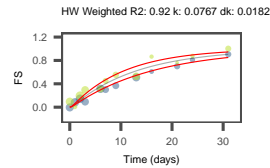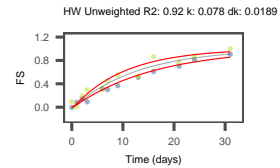**BDH**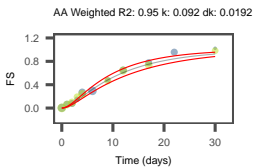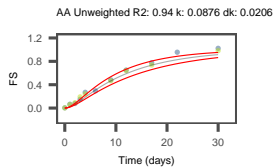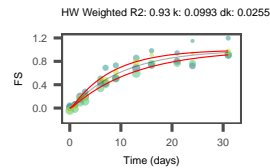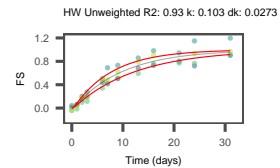**BDH2**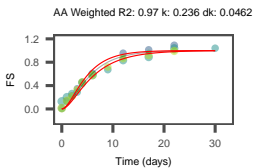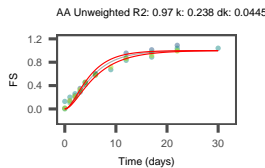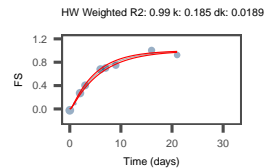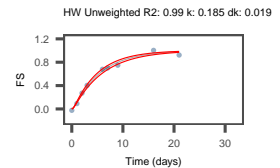

**BIEA**

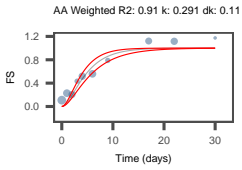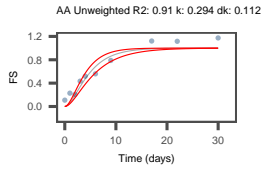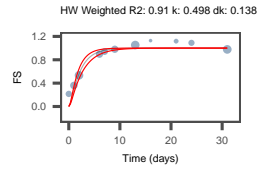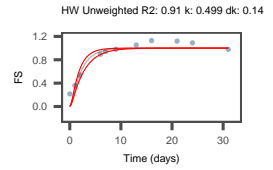

**BIP**

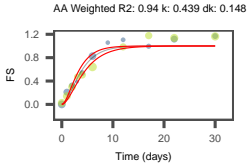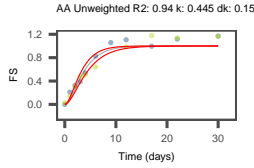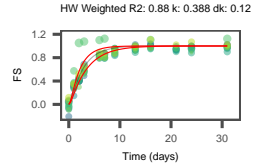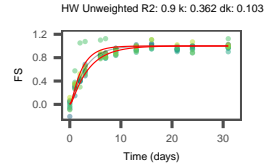

**BPHL**

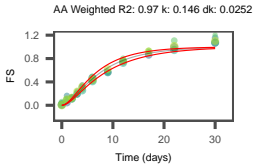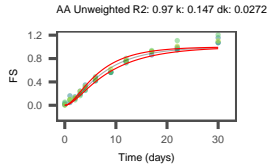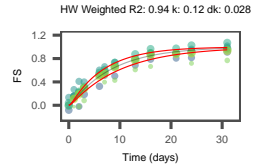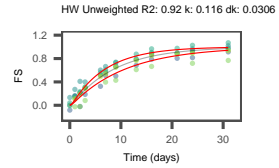

**BPNT1**

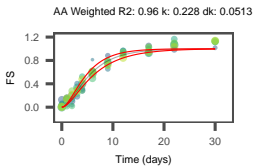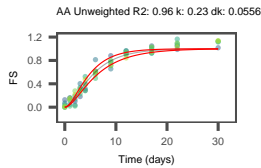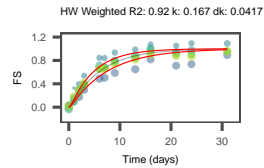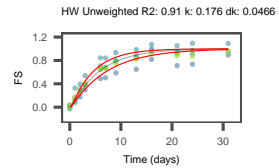

**C1TC**

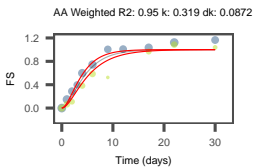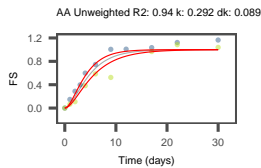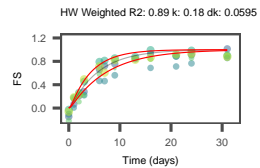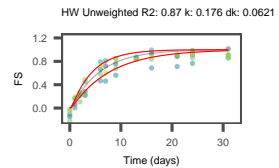

**C560**

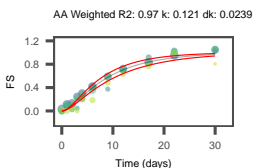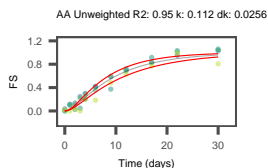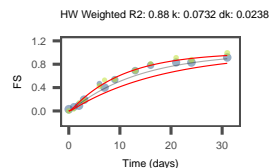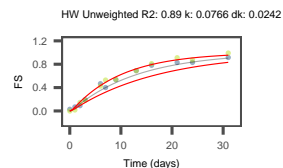

## CACP

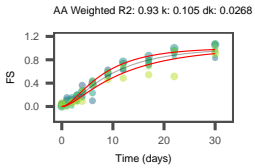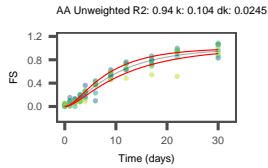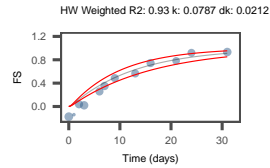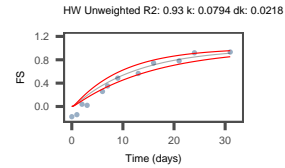

## CAD16

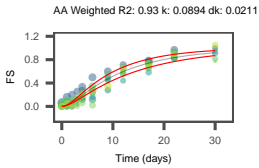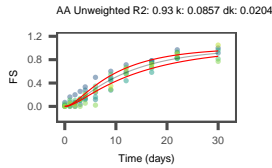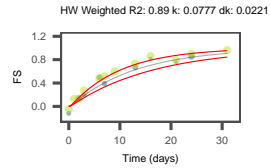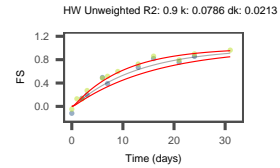

## CAH2

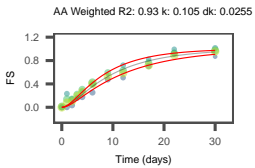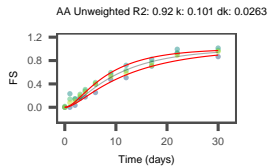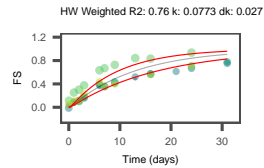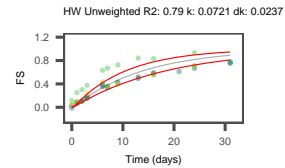

## CALB1

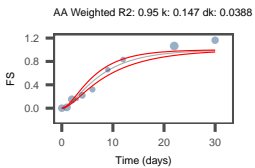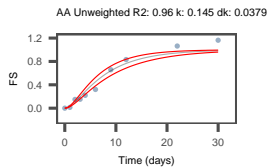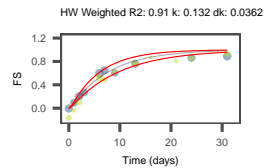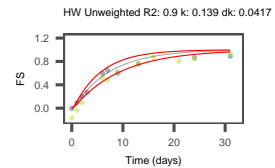

## CALR

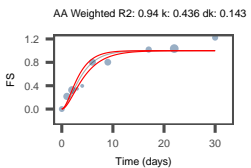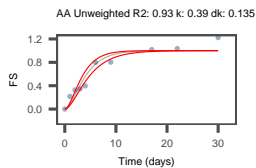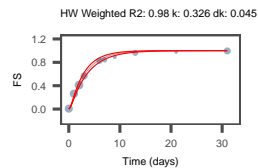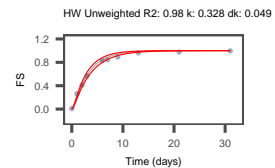

## CALX

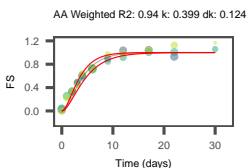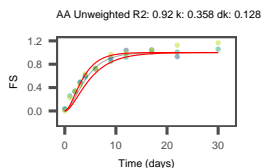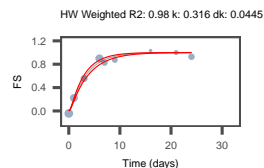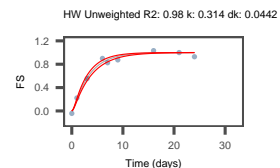

## CAND1

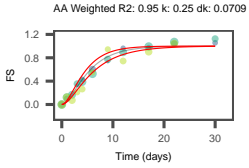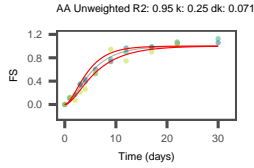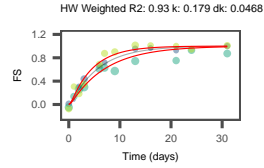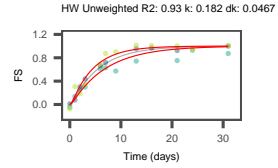

## CAP1

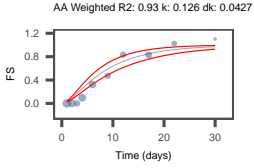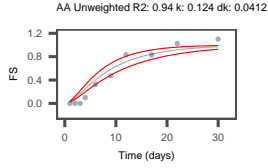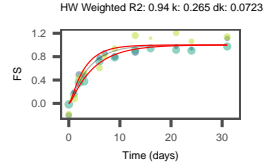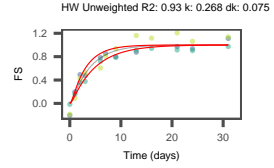

## CATA

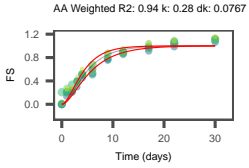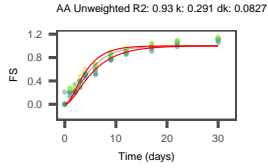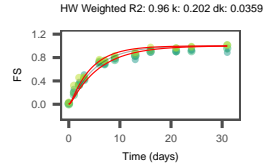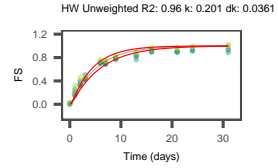

## CATH

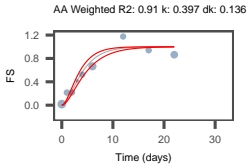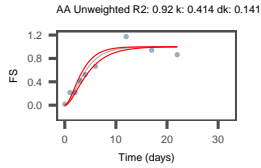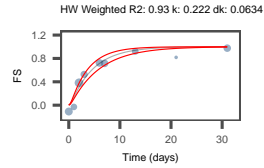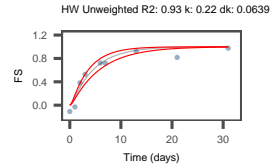

## CBR1

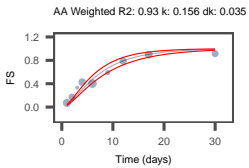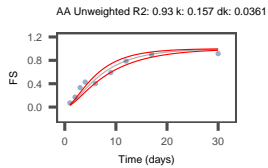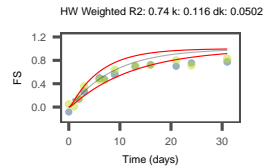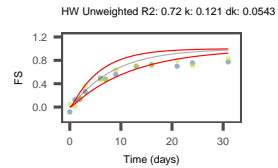

## CBR4

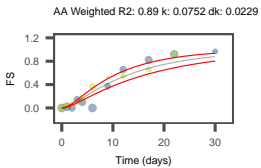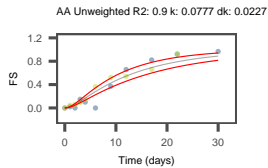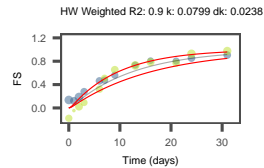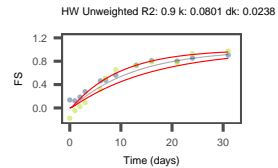



CDC42

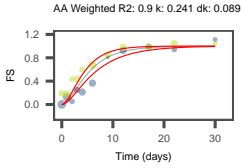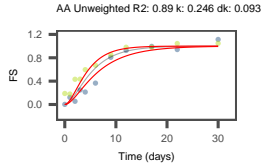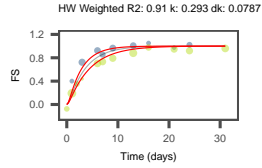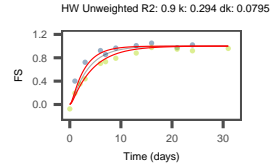

CENPV

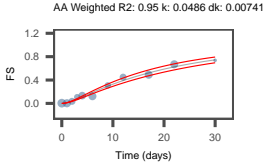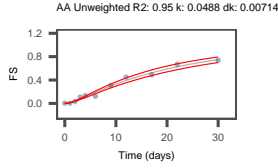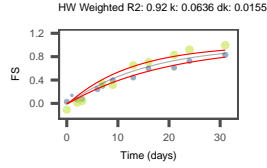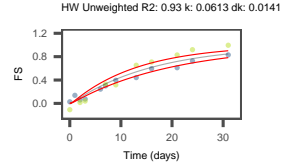

CGL

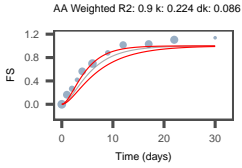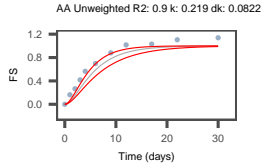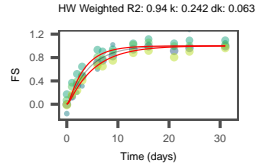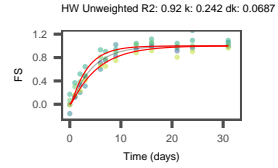

CH10

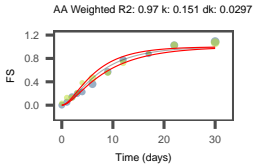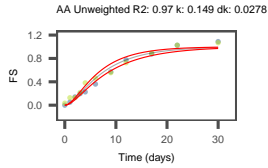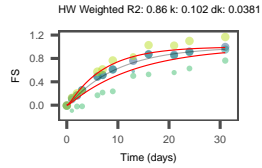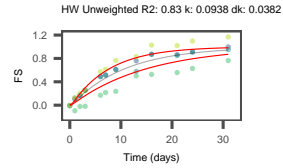

CH60

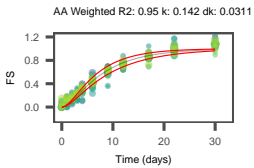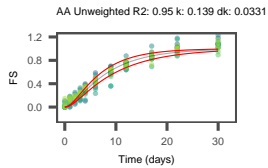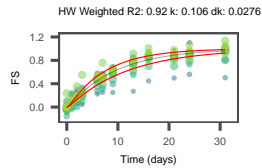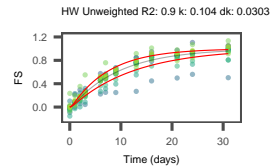

CHDH

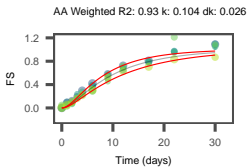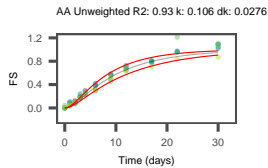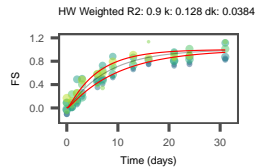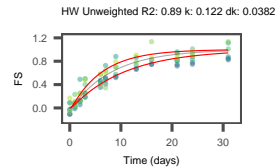

## CISD1

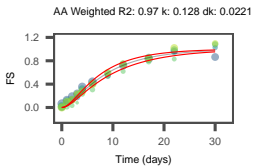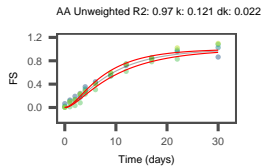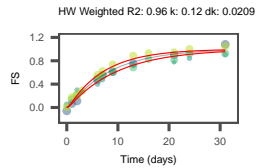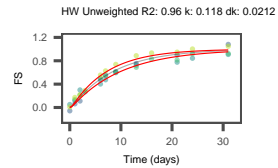

## CISY

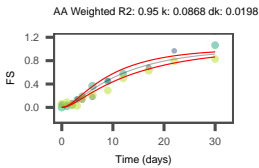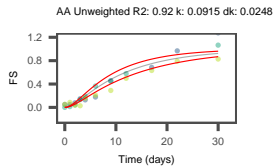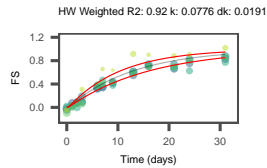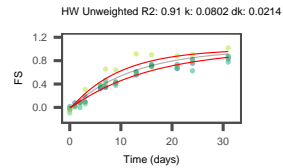

## CLH1

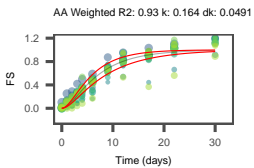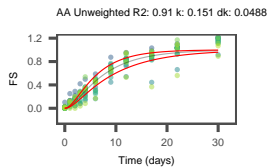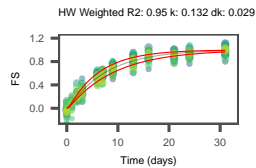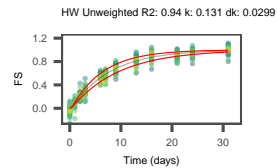

## CLIC1

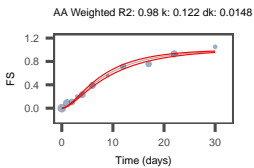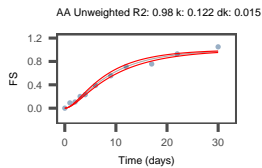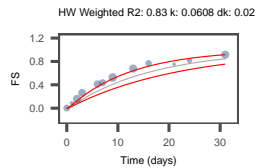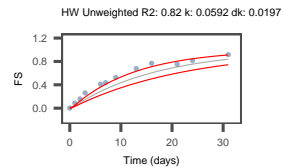

## CLIC4

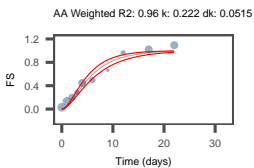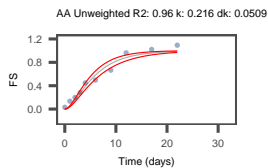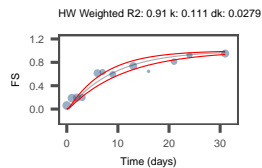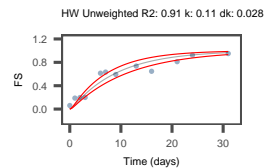

## CLTRN

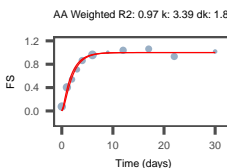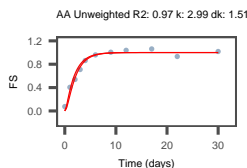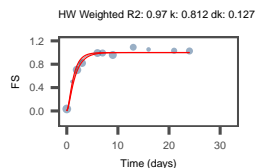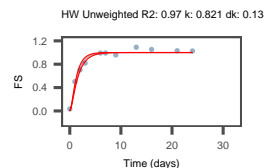

## CLYBL

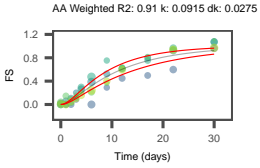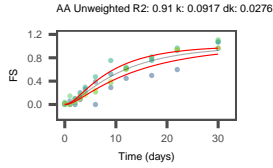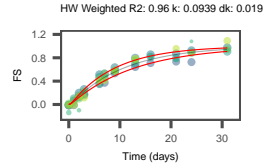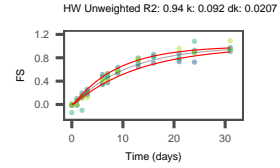

## CMBL

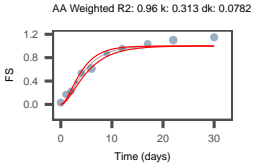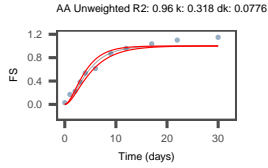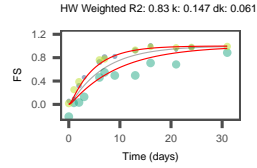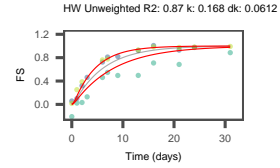

## CMC1

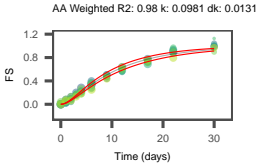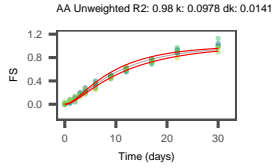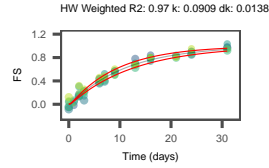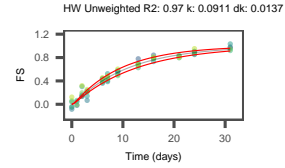

## CMC2

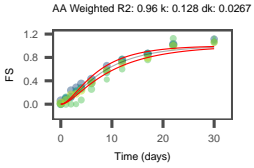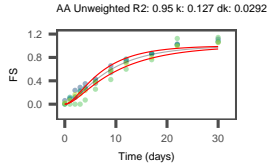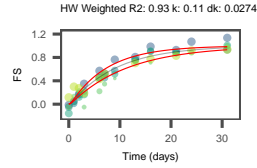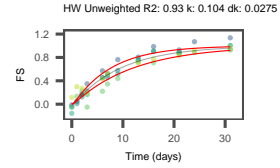

## CNDP2

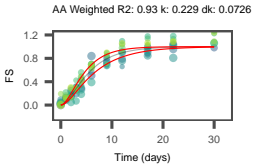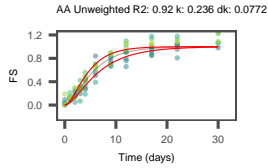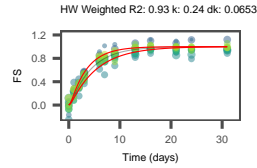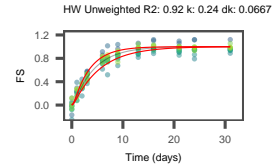

## COASY

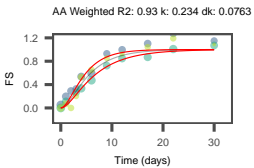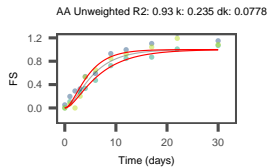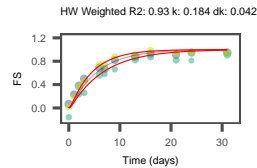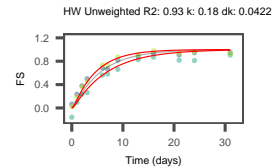

**COBL1**

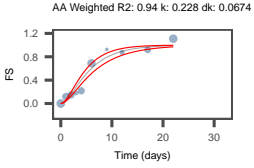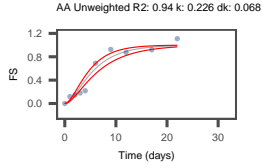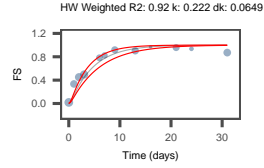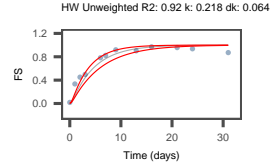

**COEA1**

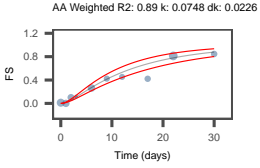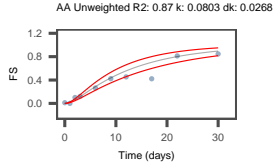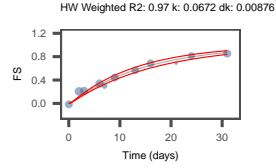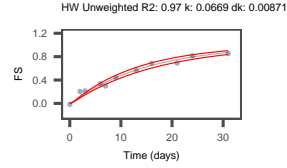

**COF1**

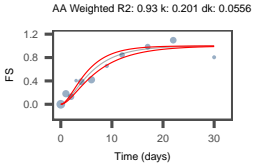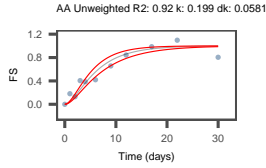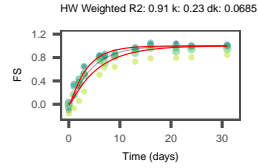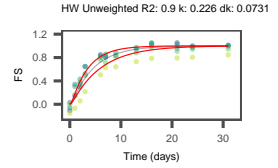

**COMT**

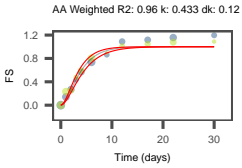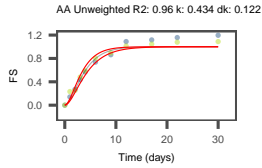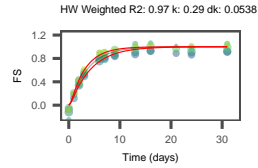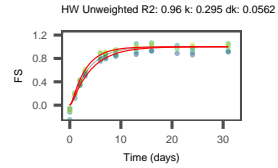

**COPA**

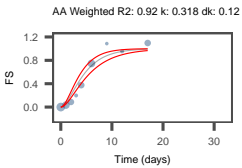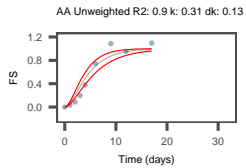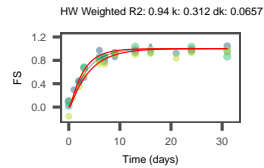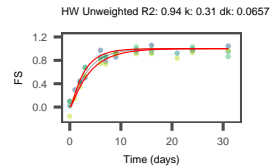

**COPB**

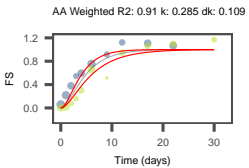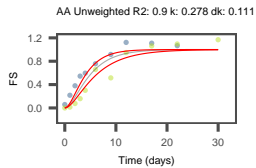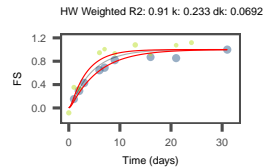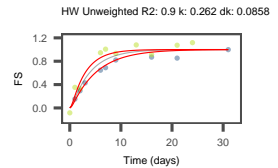

## COPB2

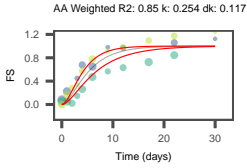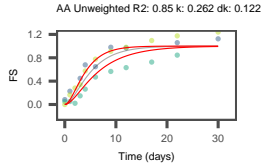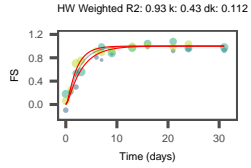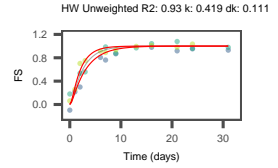

## COPG1

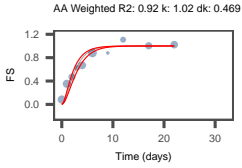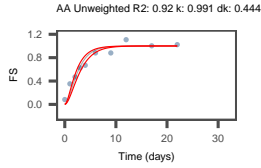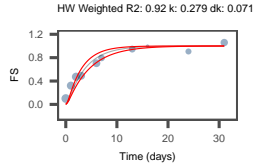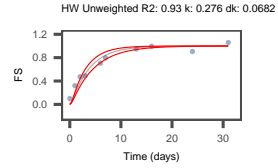

## COQ9

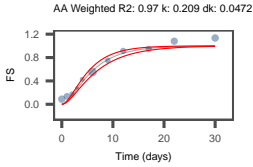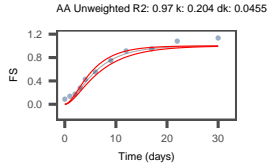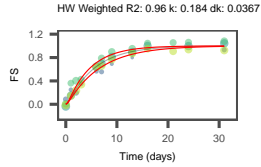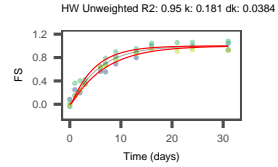

## COX1

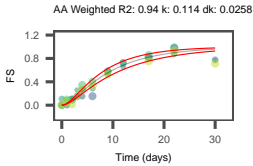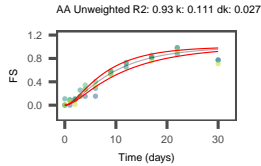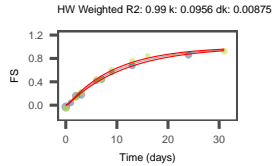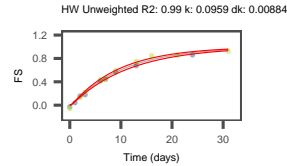

## COX2

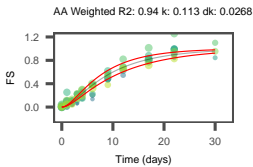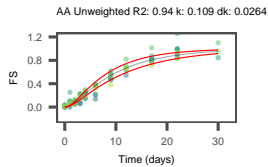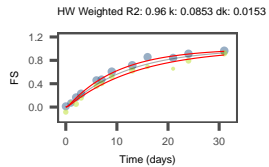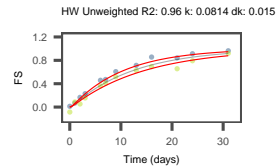

## COX3

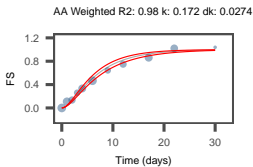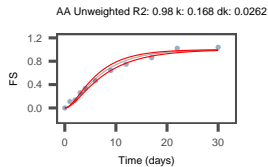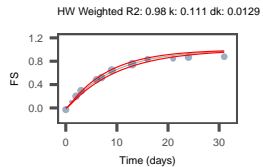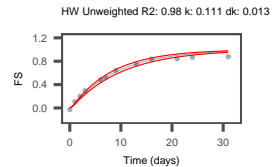

## COX41

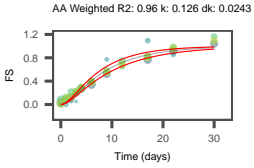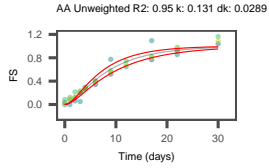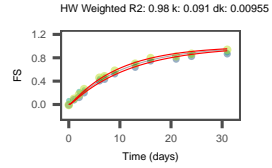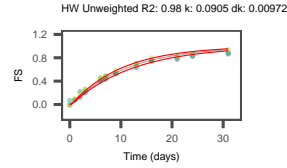

## COX5A

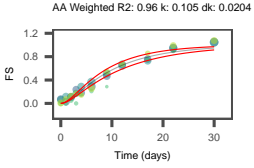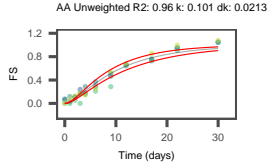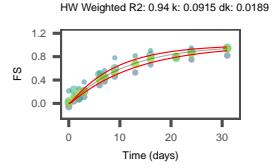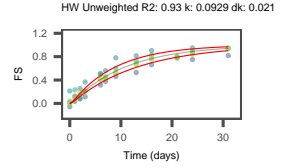

## COX5B

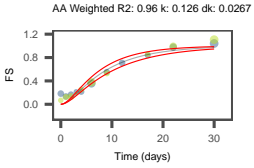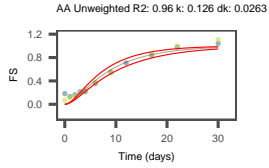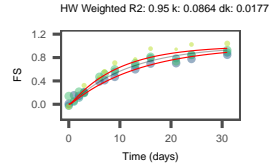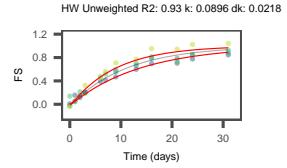

## COX6C

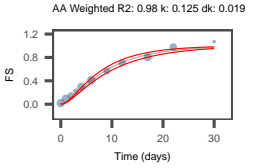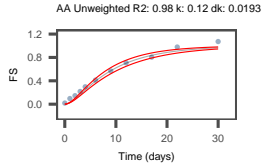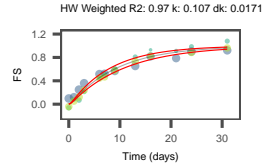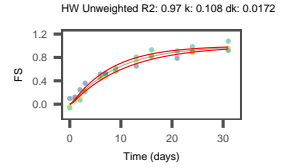

## CP2J5

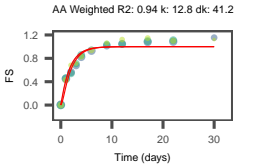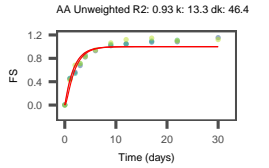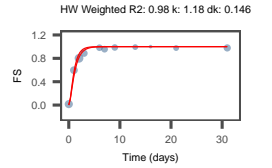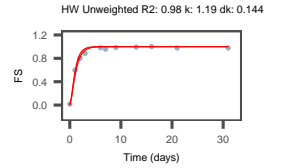

## CP4B1

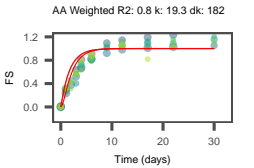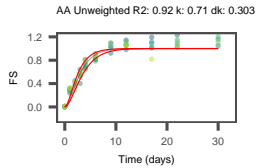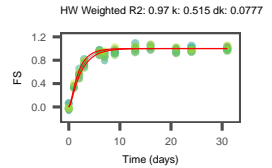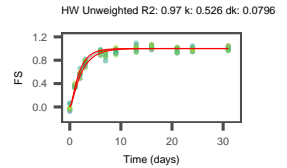

## CP51A

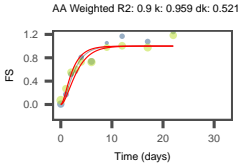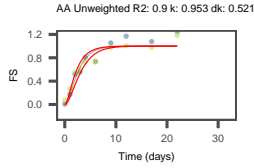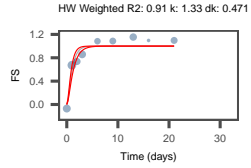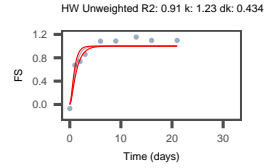

## CPT1A

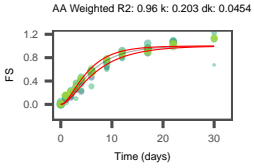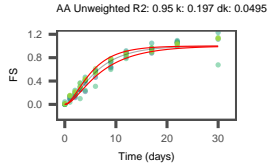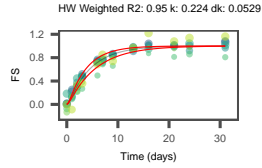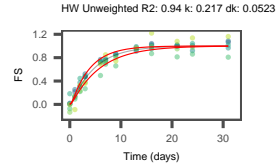

## CPT2

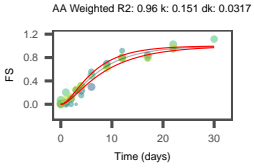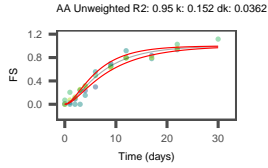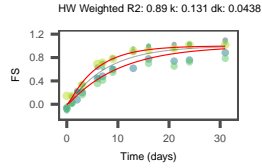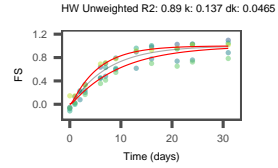

## CRYL1

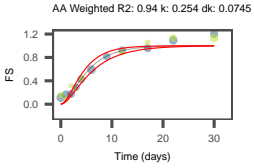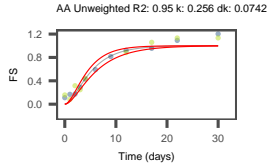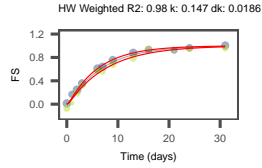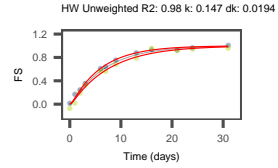

## CSAD

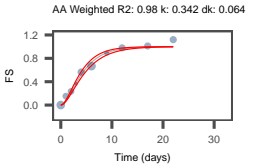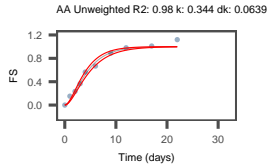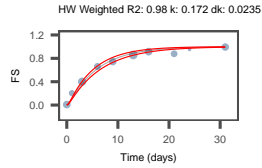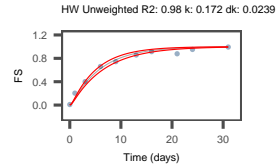

## CSRP1

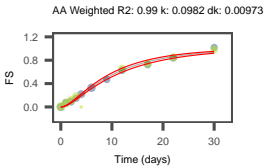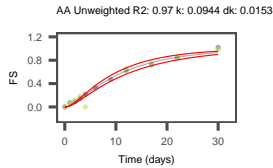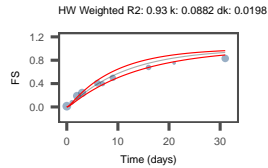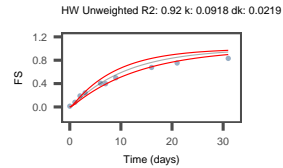

## CTND1

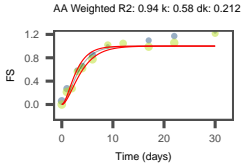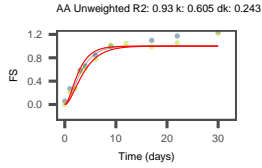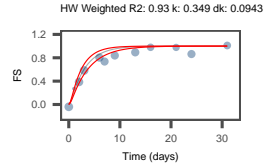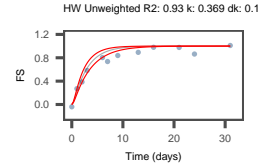

## CUBN

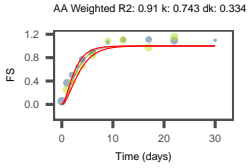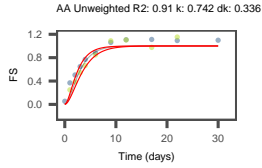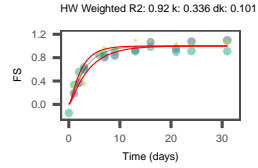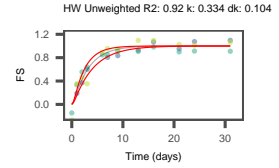

## CX6B1

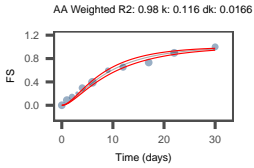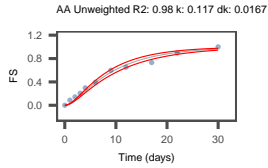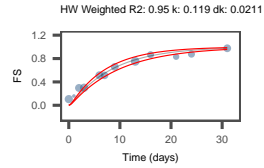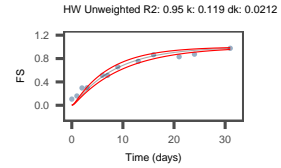

## CY1

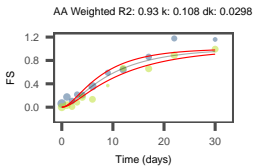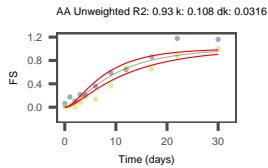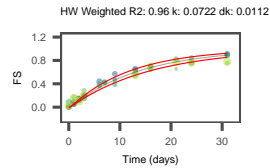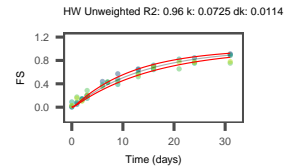

## CYC

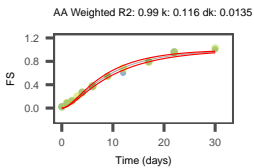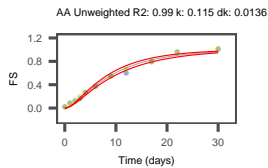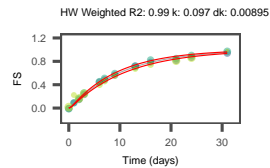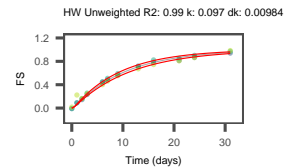

## CYTB

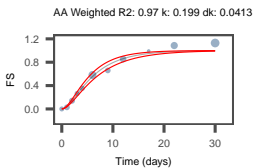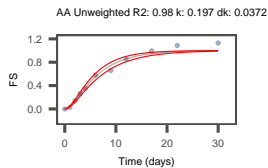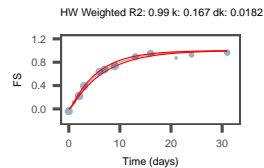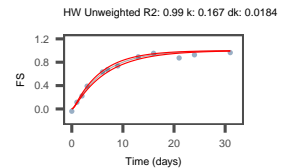



D39U1

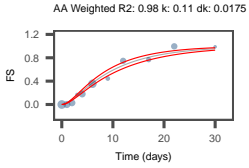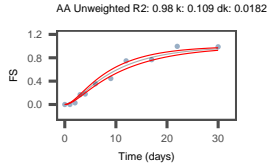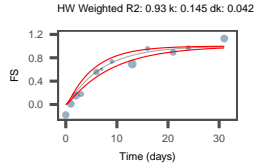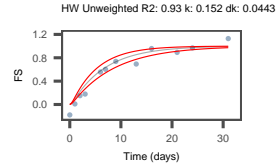

DAB2

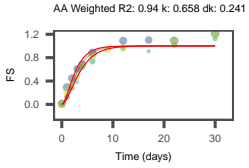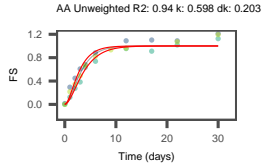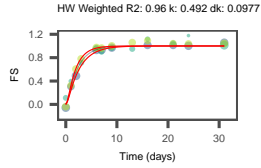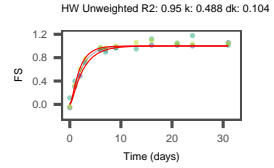

DCXR

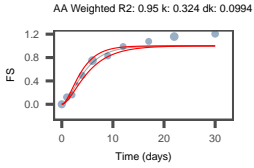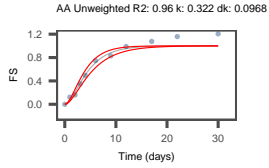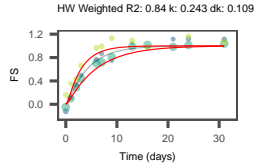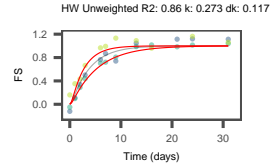

DDAH1

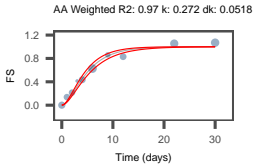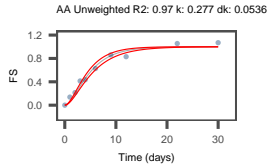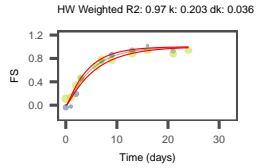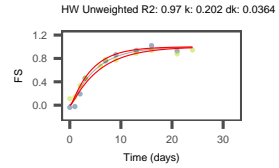

DDX1

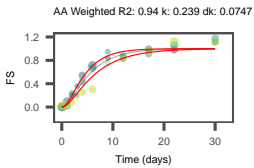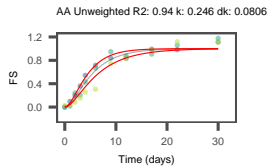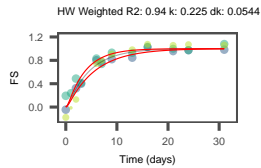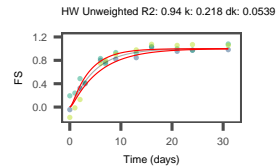

DECR

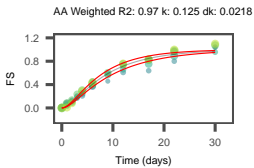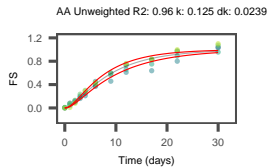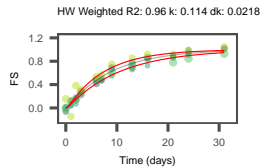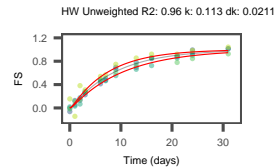

DHB4

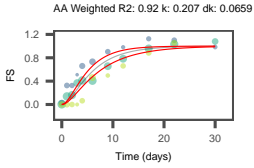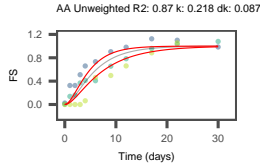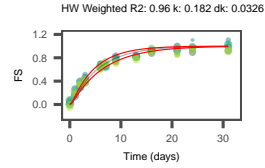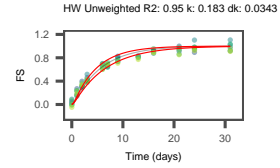

DHE3

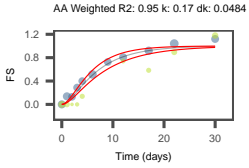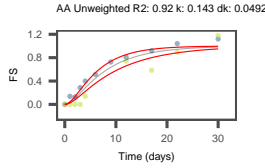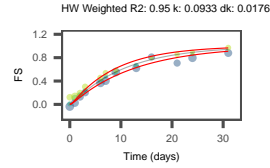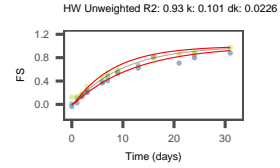

DHPR

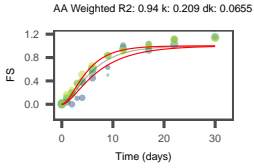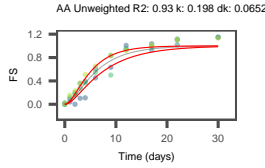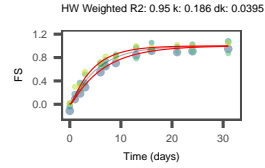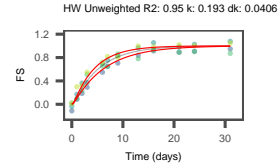

DHRS1

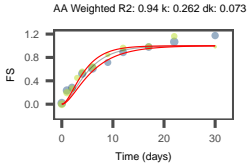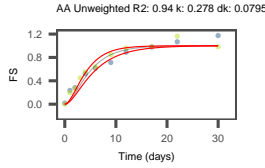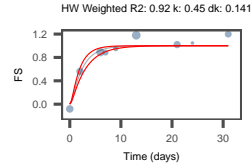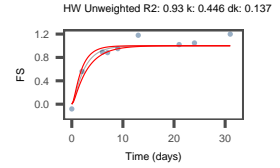

DHRS4

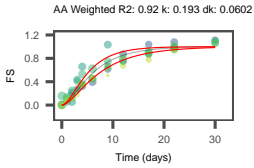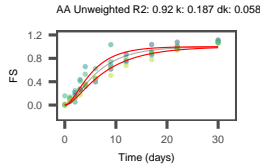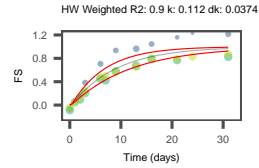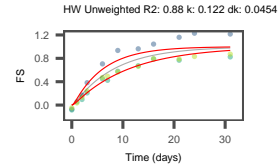

DHSO

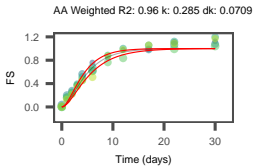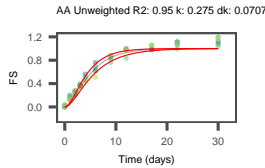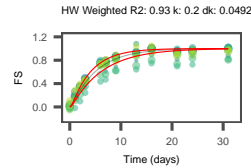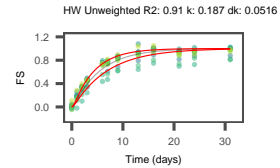

## DHTK1

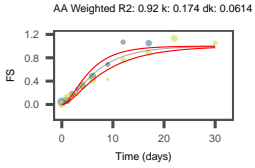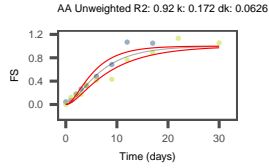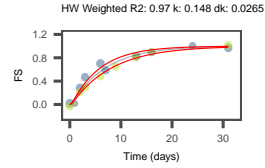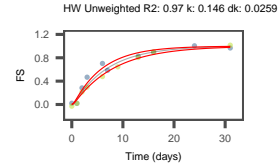

## DHX9

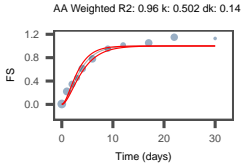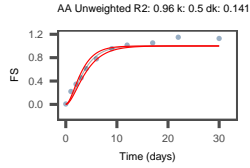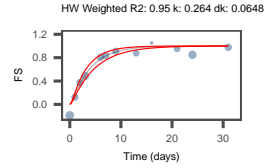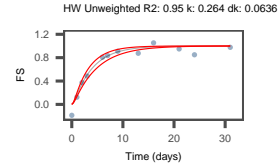

## DIC

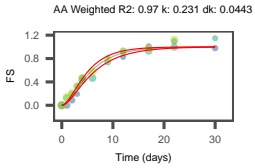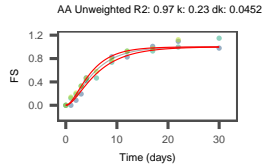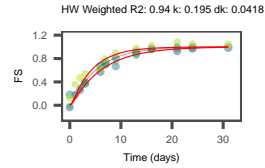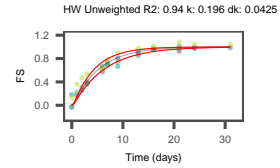

## DLDH

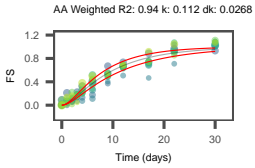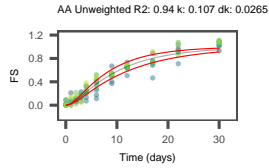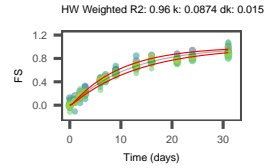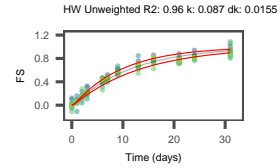

## DNJA3

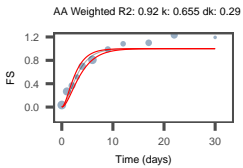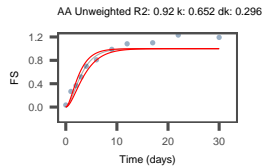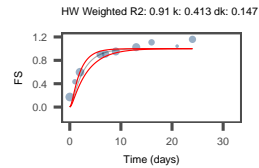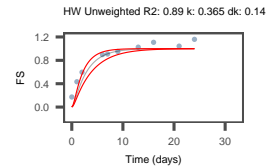

## DPEP1

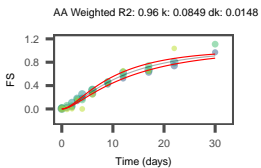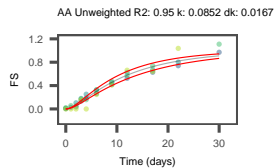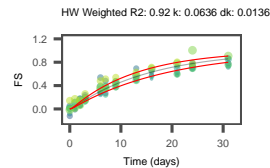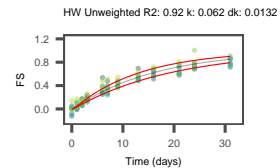

DYHC1

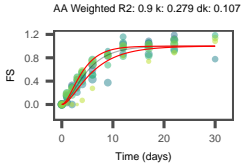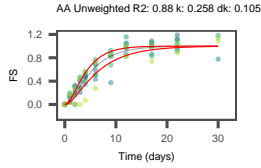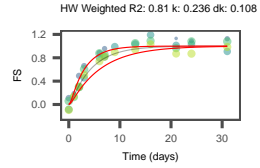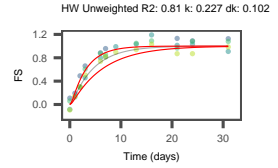

E41L3

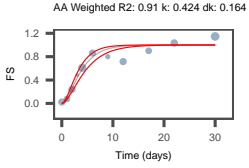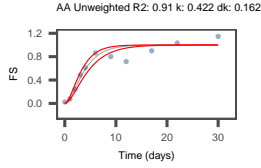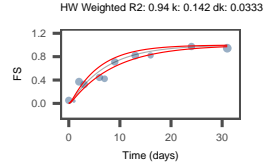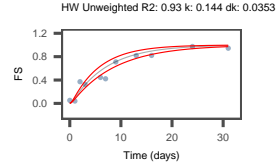

ECHA

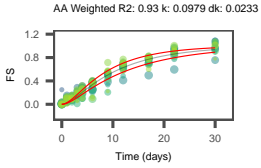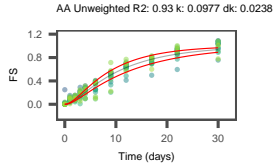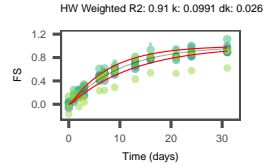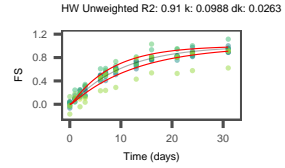

ECHB

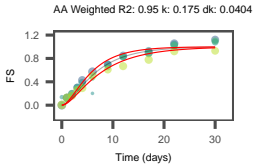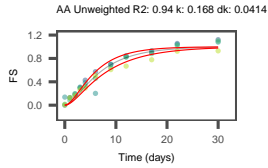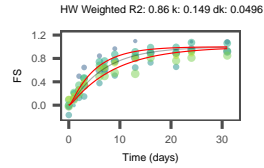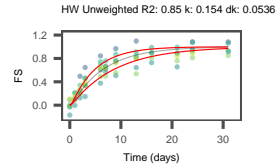

ECHM

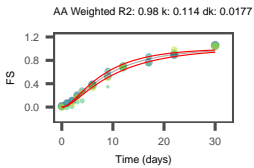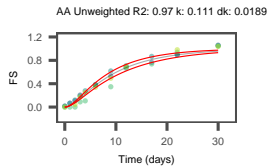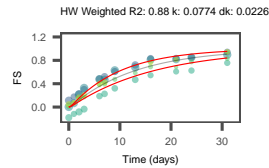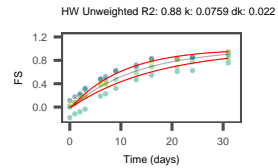

ECHP

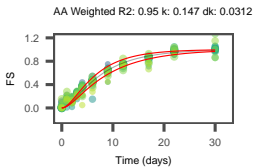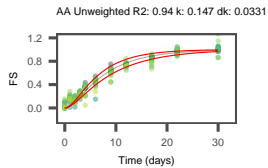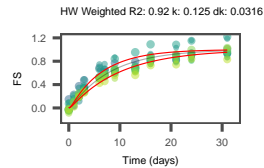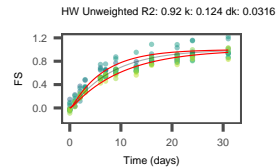

## ECI1

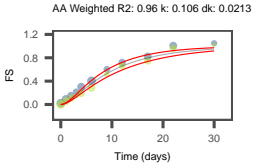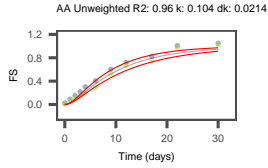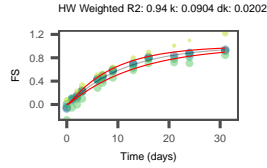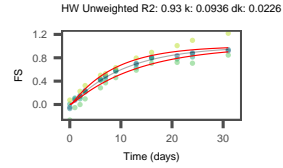

## ECI2

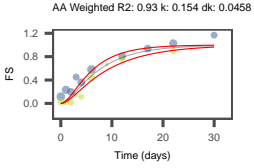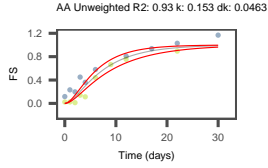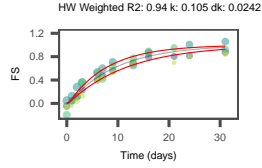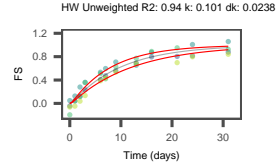

## ECI3

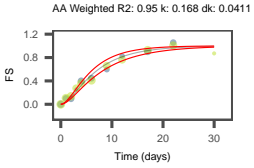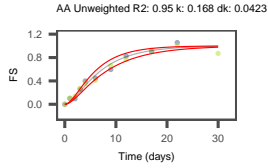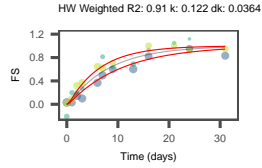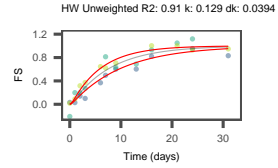

## ECSIT

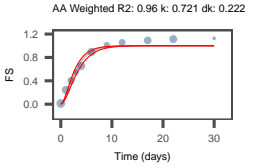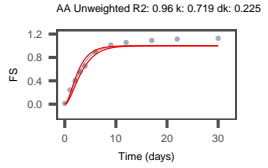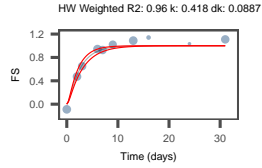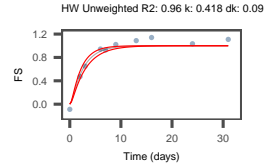

## EF1A1

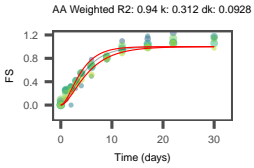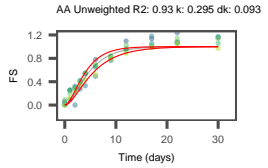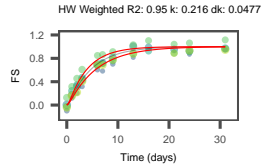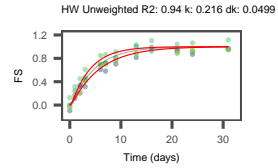

## EF1G

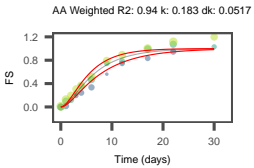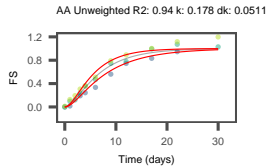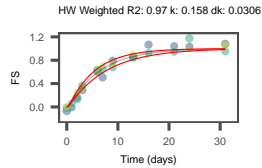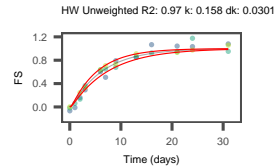

## EF2

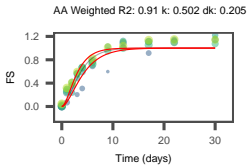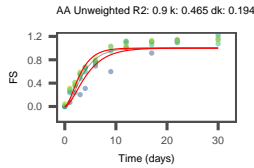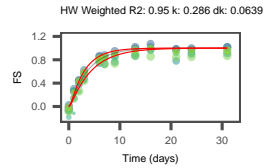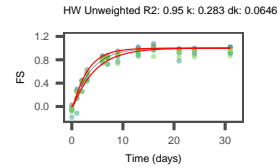

## EFTU

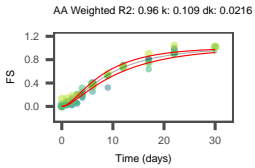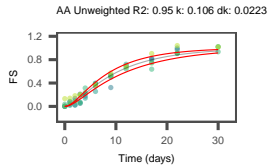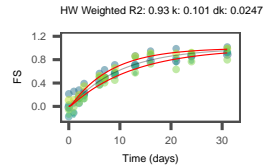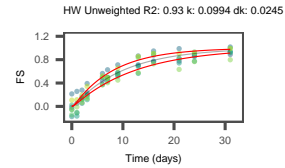

## EHD4

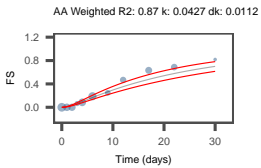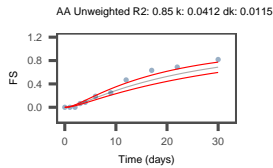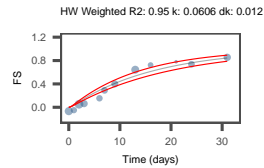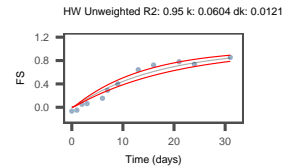

## EIF3B

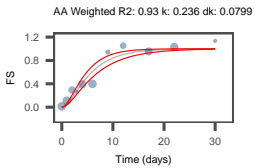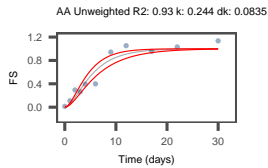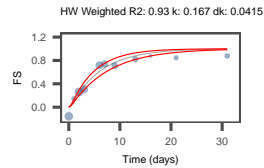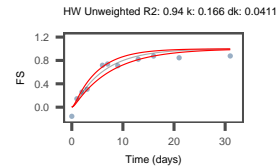

## EIF3H

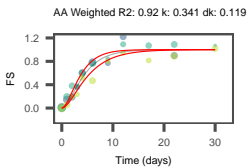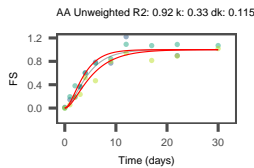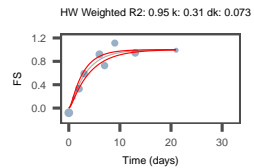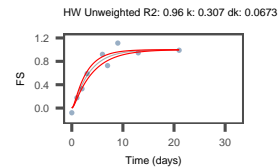

## EM55

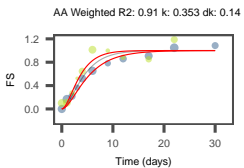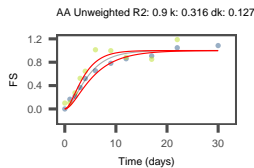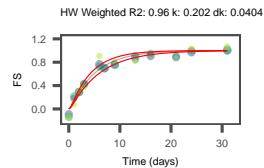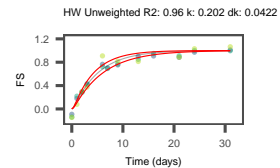

## ENOA

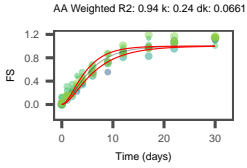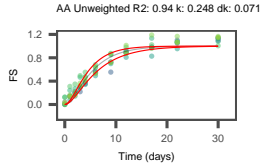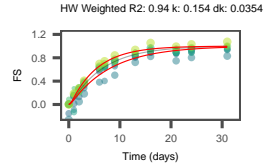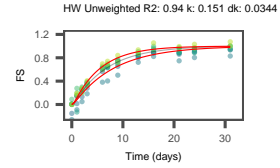

## ENPL

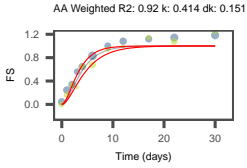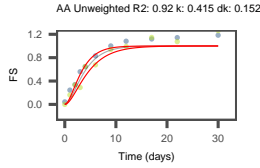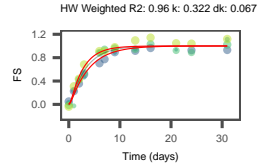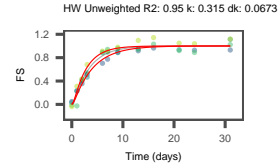

## ENPP3

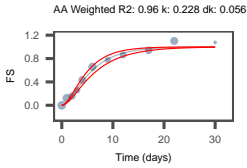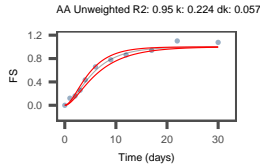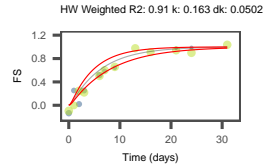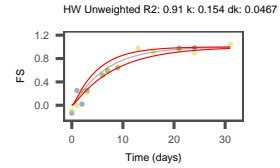

## ENTP5

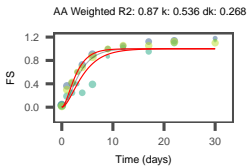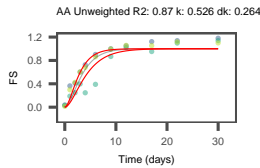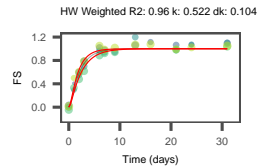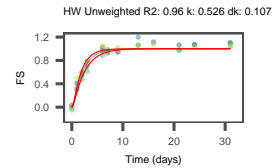

## ERLN2

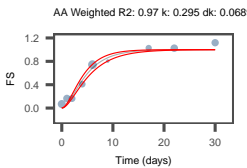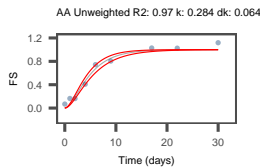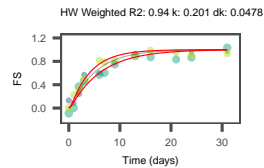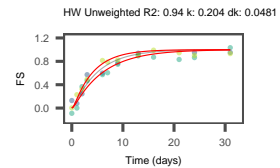

## ES8L2

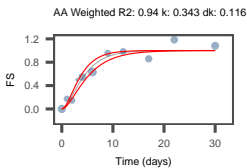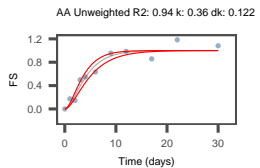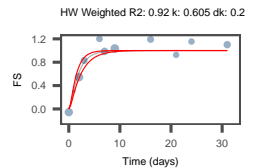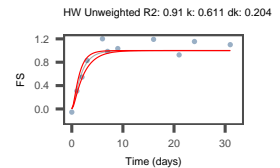

## EST1C

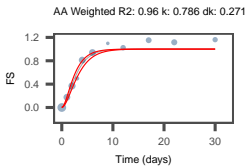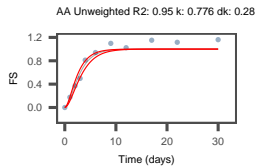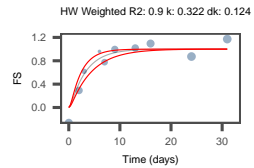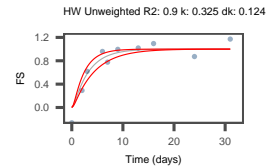

## EST1D

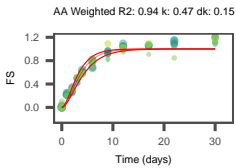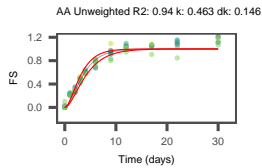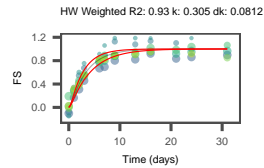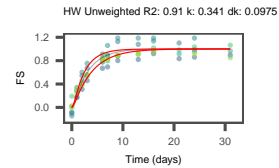

## EST1F

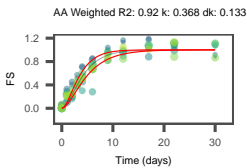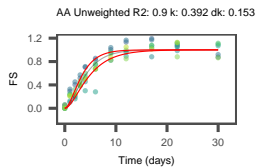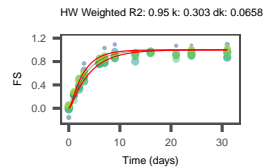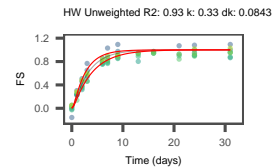

## EST2C

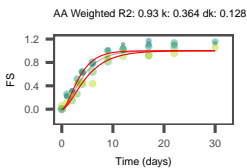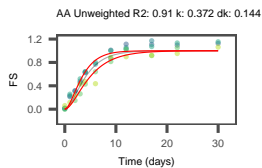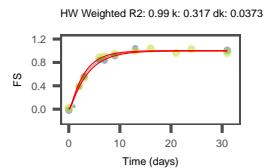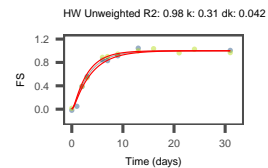

## ESTD

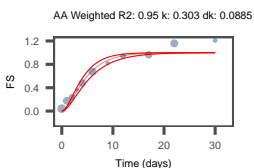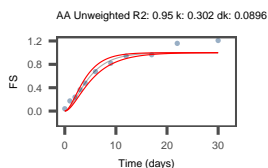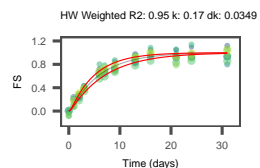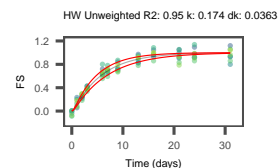

## ETFA

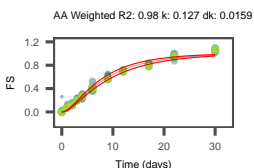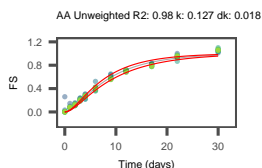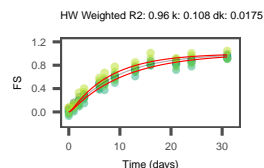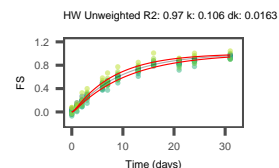



## ETFB

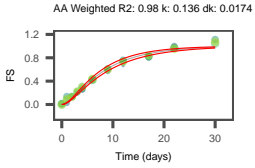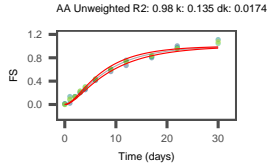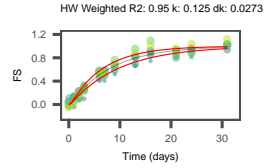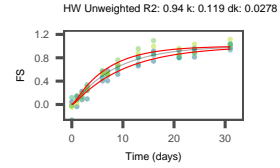

## ETFD

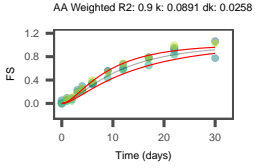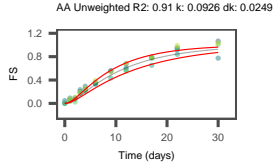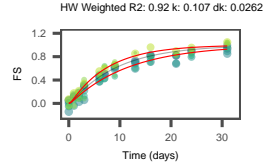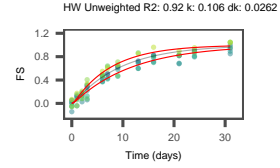

## EZRI

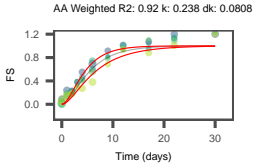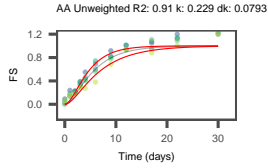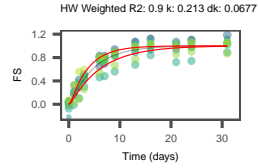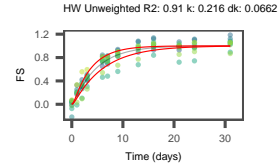

## F16P1

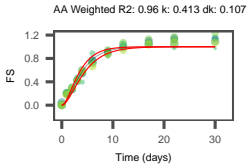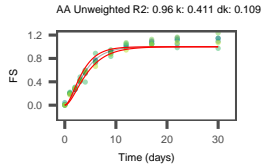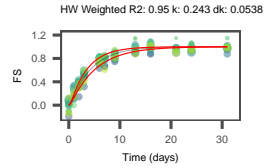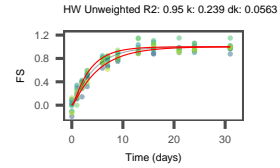

## FAAA

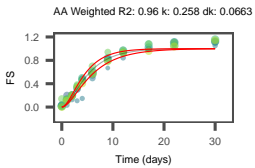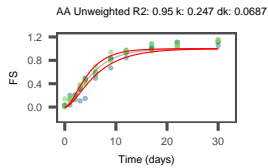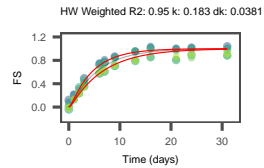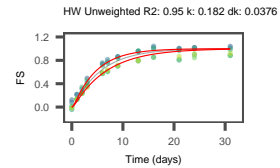

## FABP4

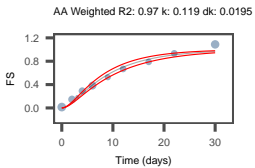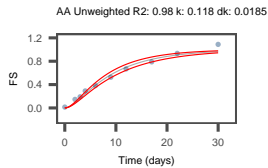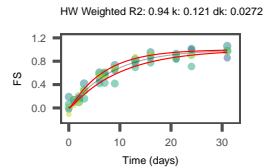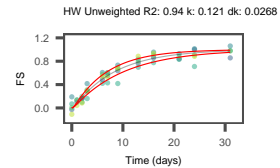

## FAHD1

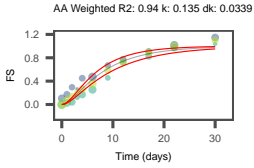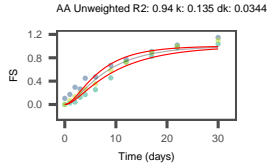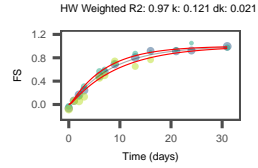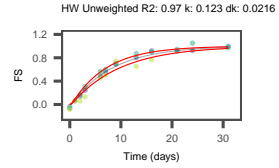

## FAHD2

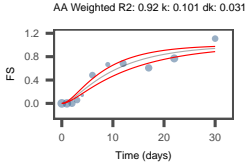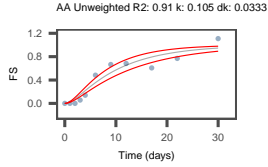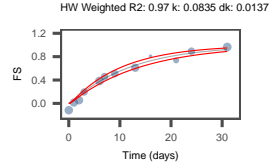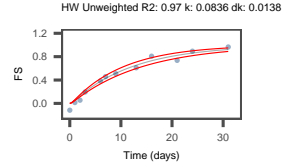

## FAS

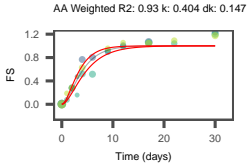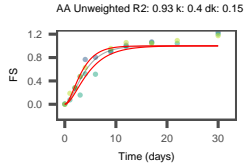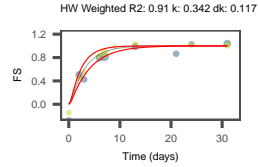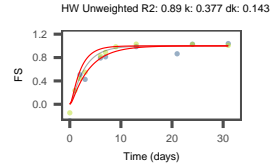

## FERM2

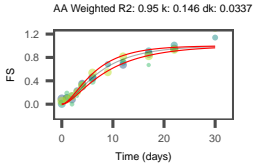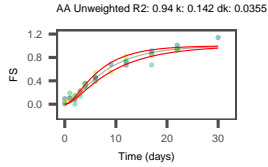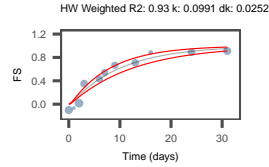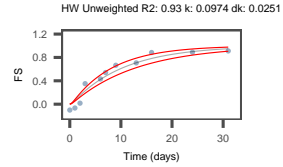

## FHL1

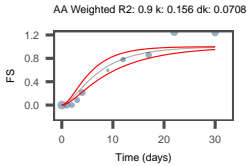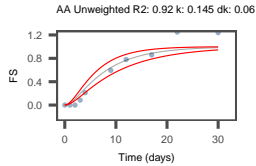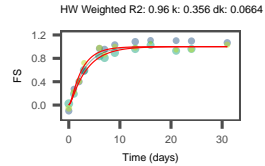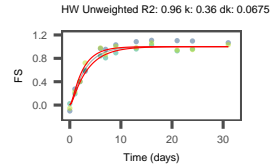

## FIBA

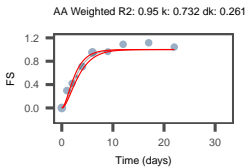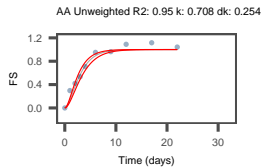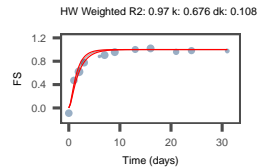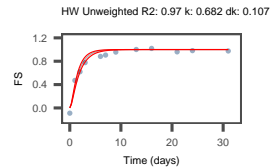

## FIBG

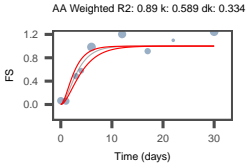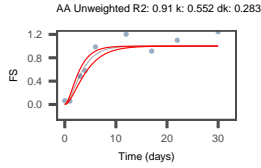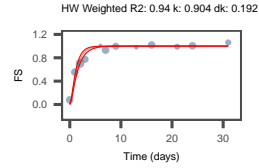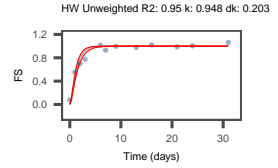

## FIS1

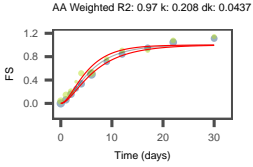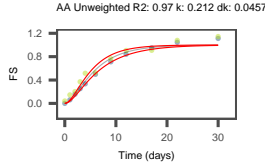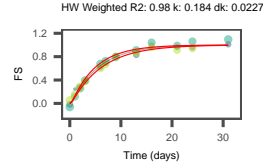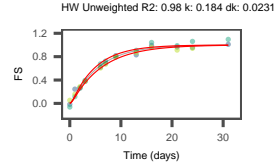

## FLNA

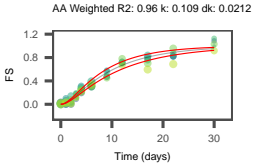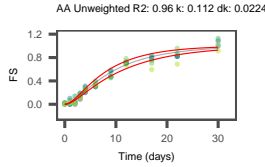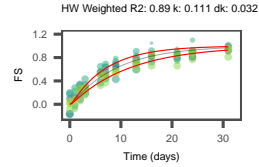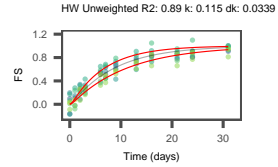

## FLNB

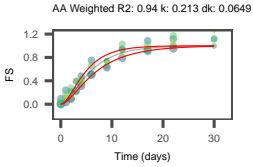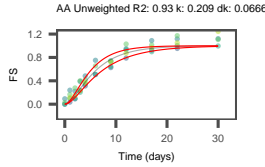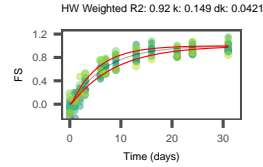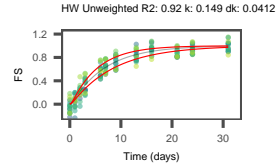

## FMO1

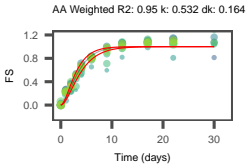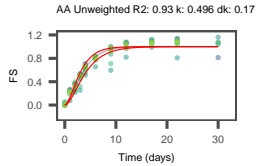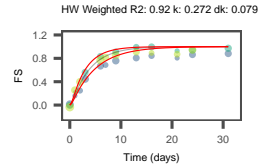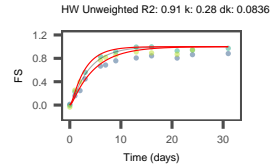

## FMO2

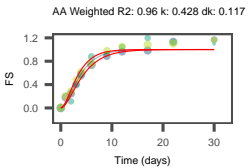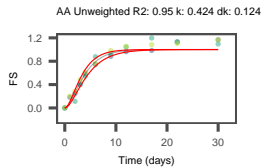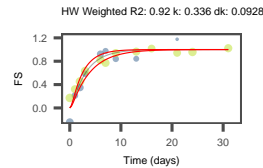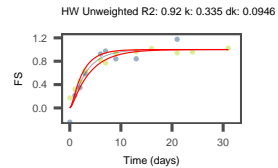

## FMO4

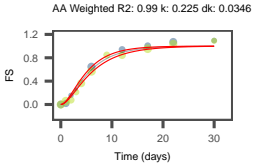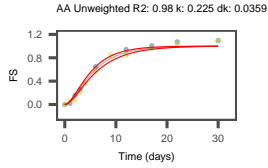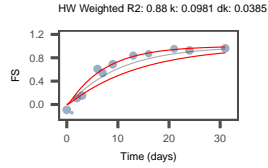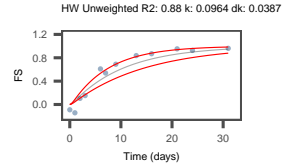

## FMO5

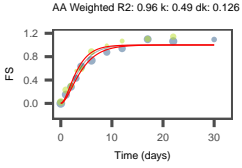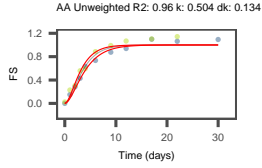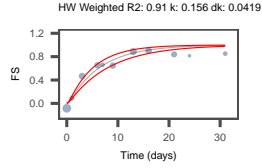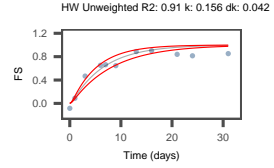

## FOLH1

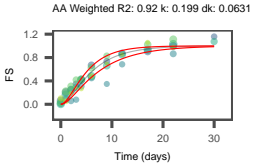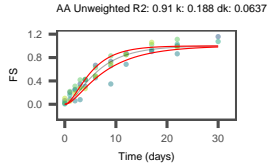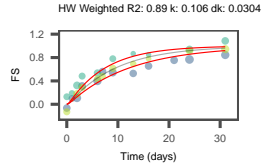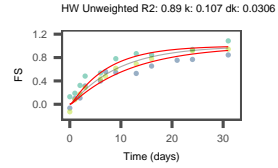

## FUMH

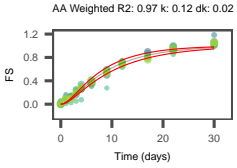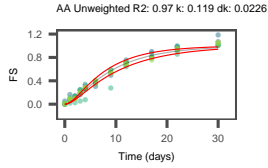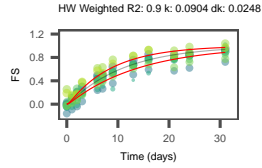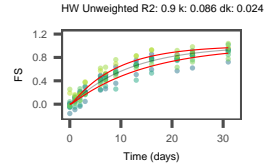

## G3P

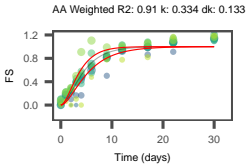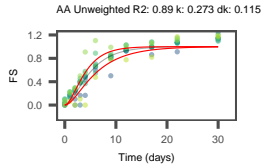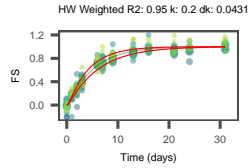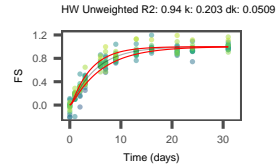

## G6P1

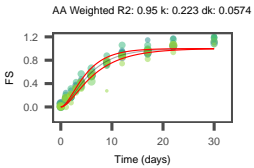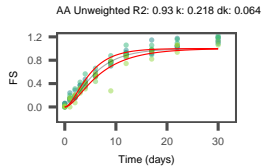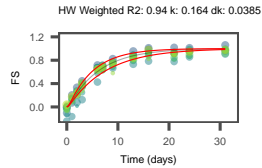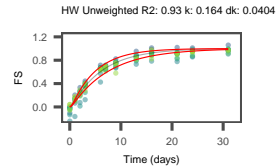

## GABT

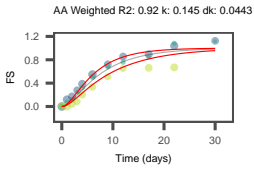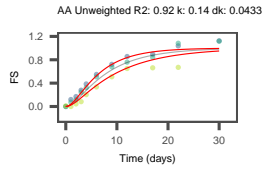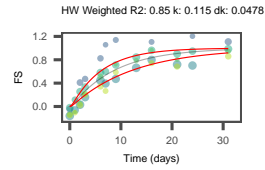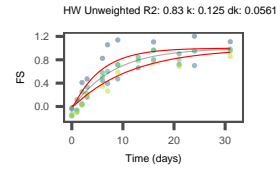

## GAL3A

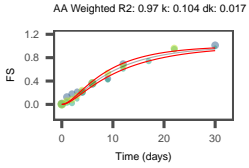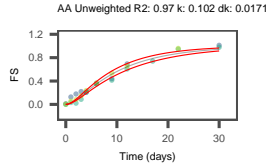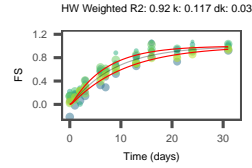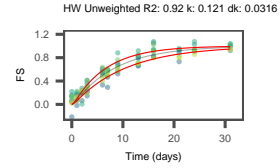

## GALM

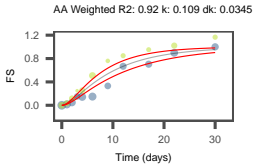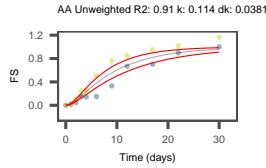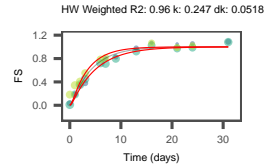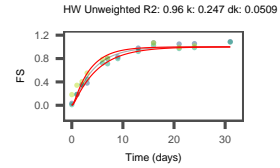

## GALNS

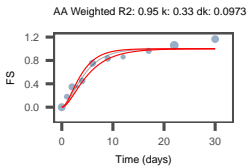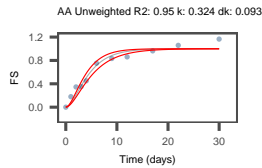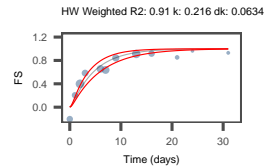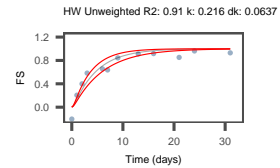

## GANAB

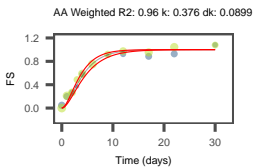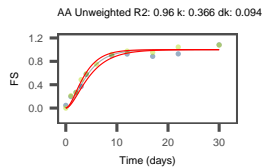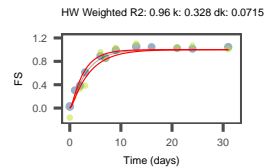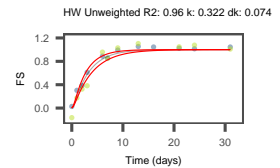

## GAS2

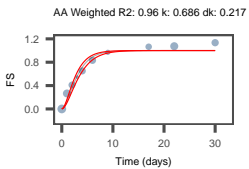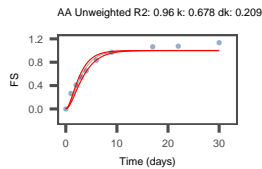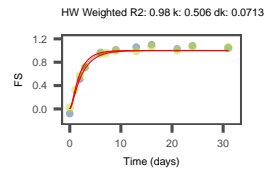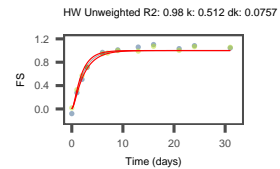

## GATM

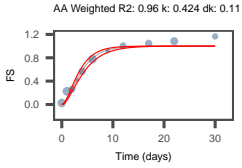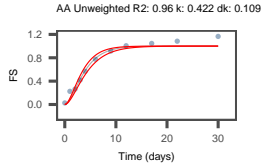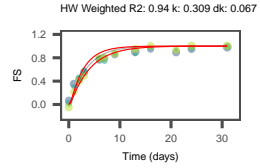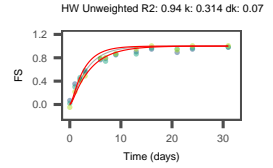

## GCDH

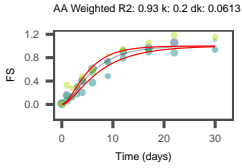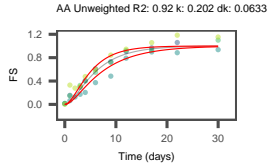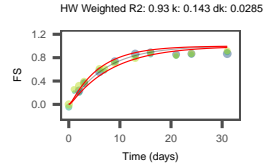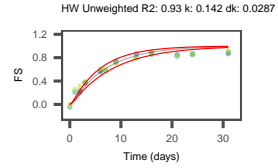

## GCST

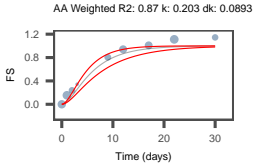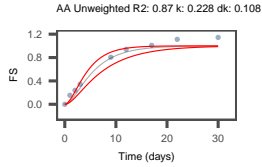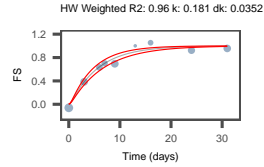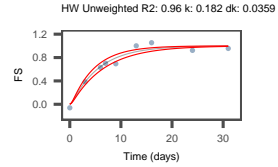

## GDIA

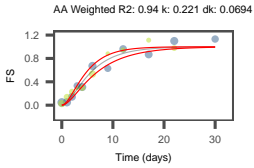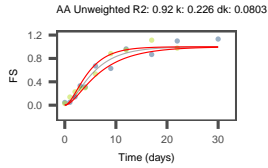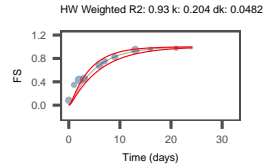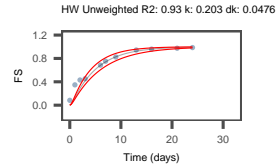

## GDIB

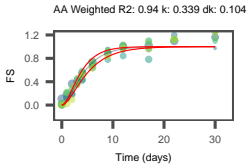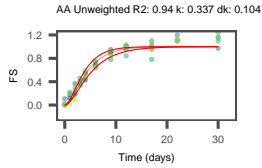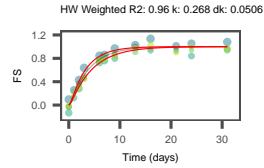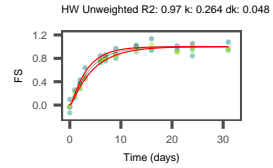

## GDIR1

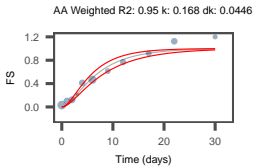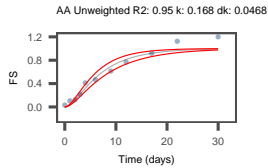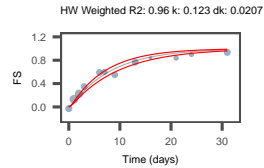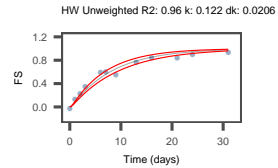

## GGT1

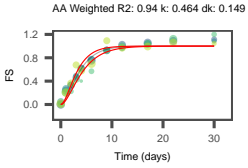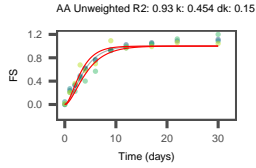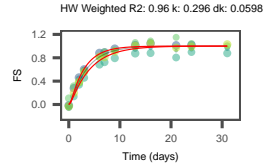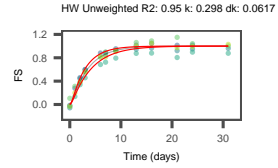

## GLCTK

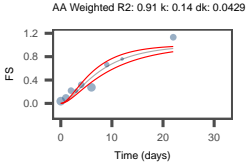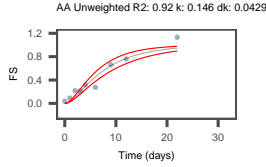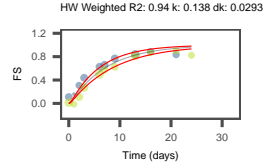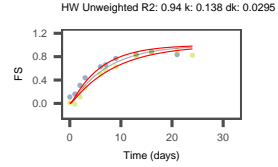

## GLO2

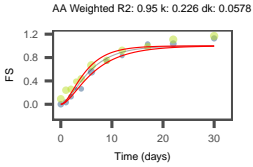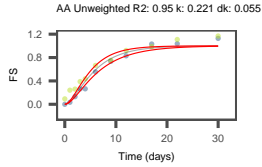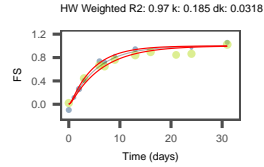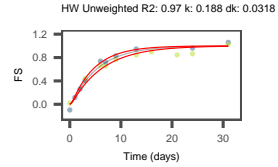

## GLPK

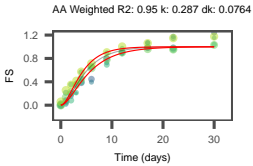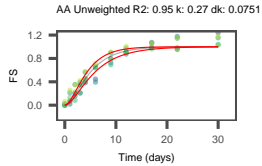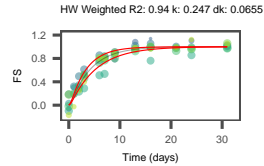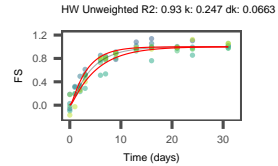

## GLUCM

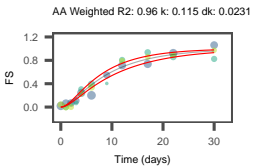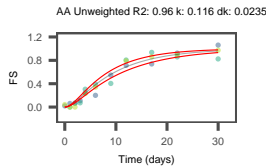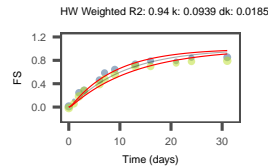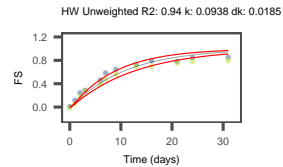

## GLYAT

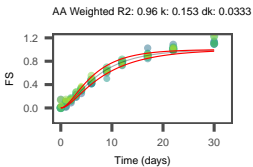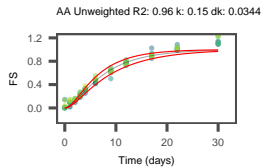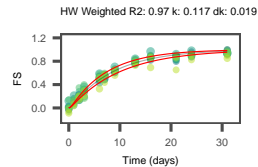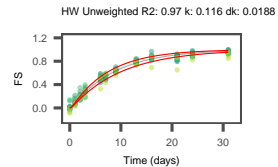

## GLYM

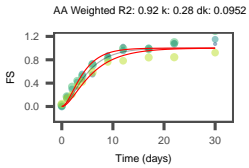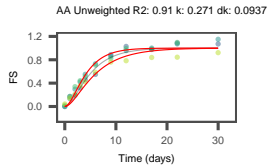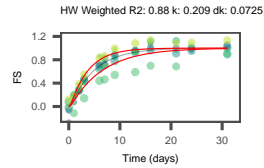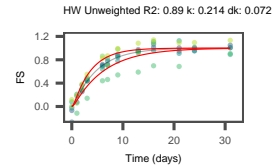

## GPDA

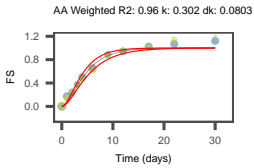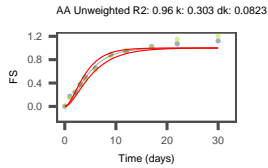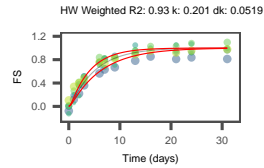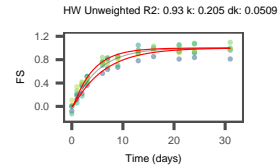

## GPDH

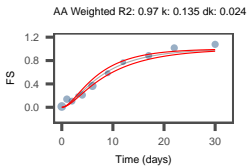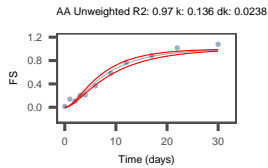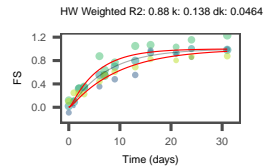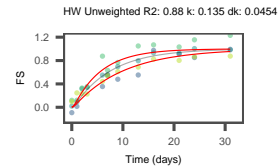

## GPX1

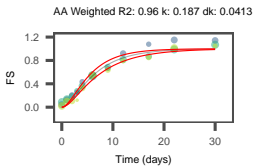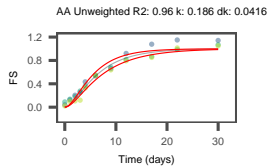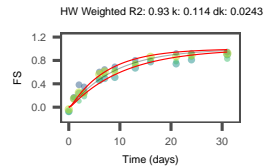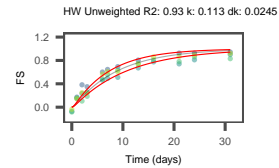

## GPX3

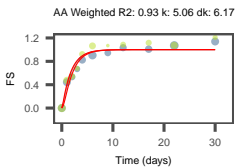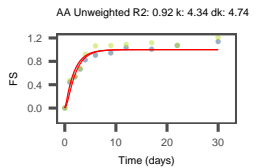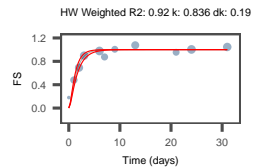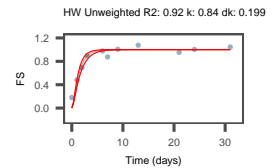

## GRHPR

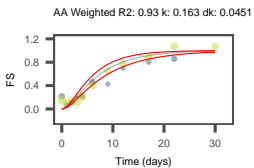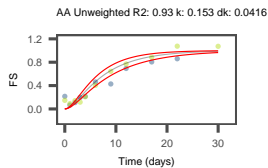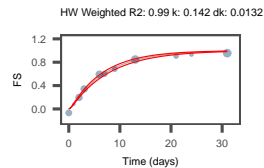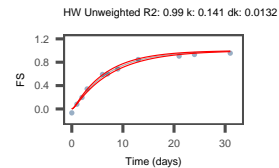



GRP75

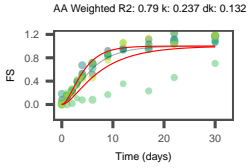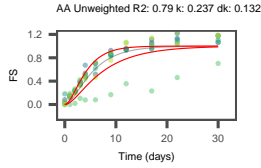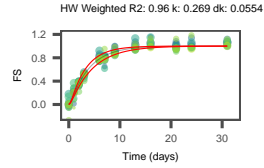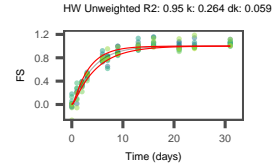

GSTA3

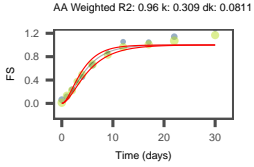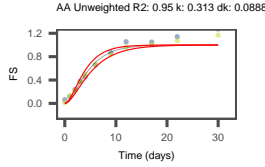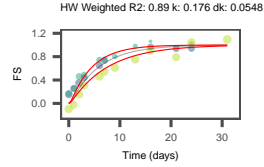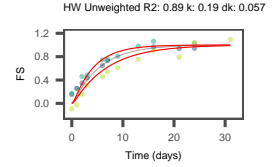

GSTK1

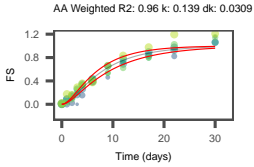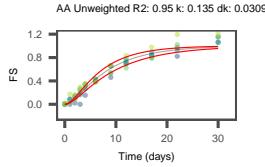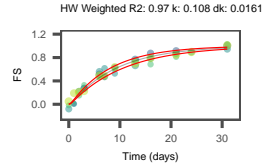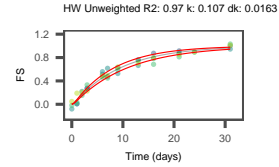

GSTM1

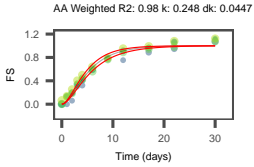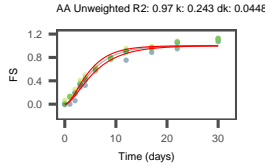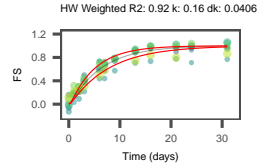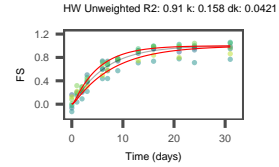

GSTM2

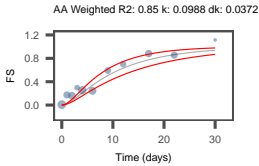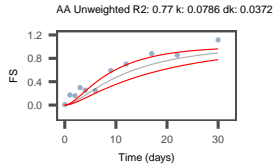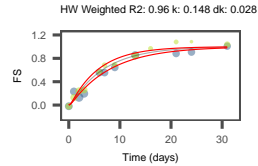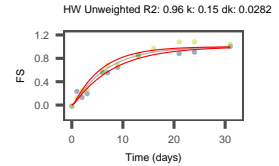

GSTT2

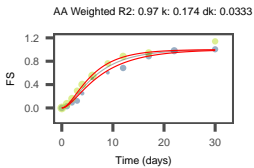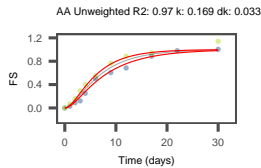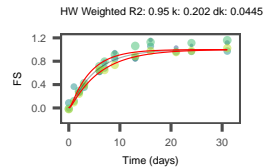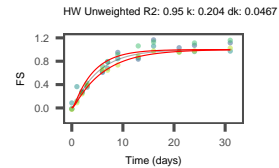

H10

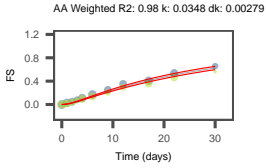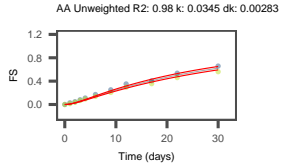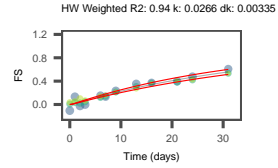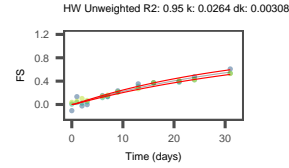

H14

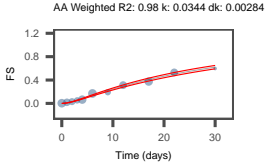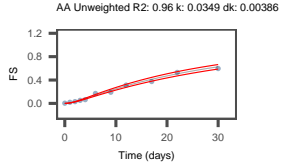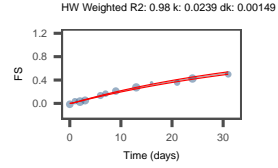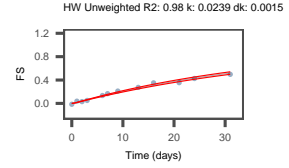

H2AY

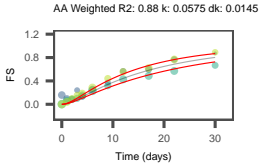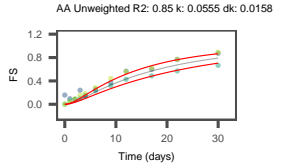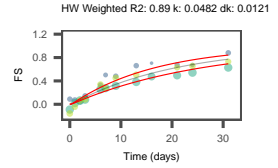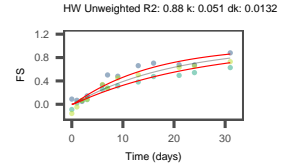

H4

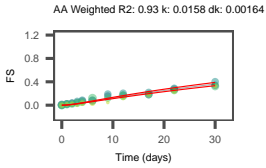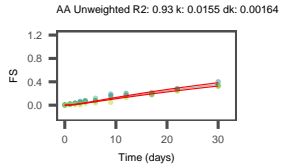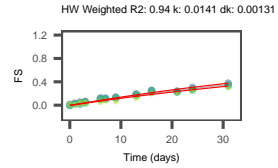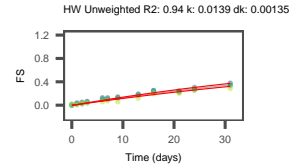

HACL2

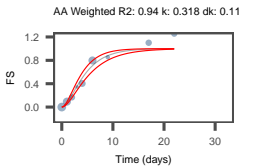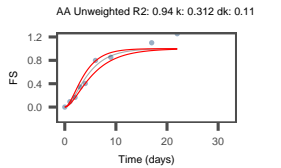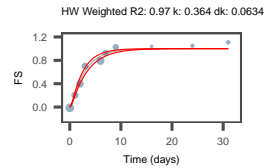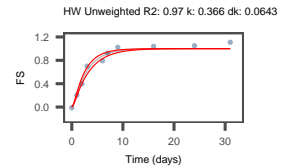

HAOX2

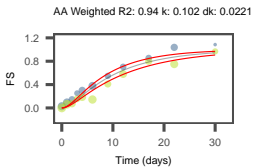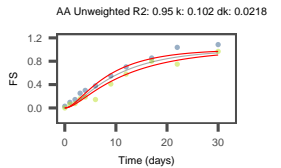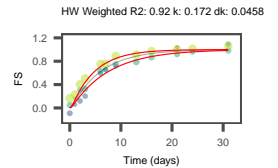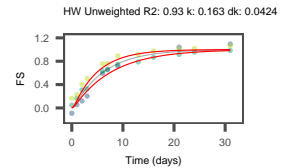

HBA

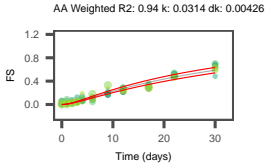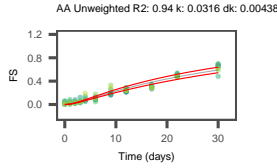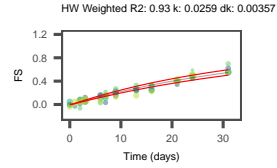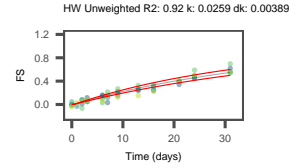

HBB1

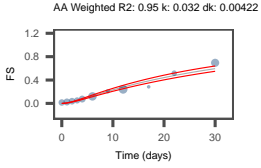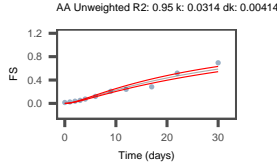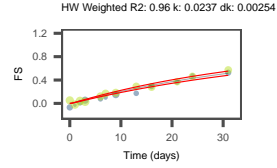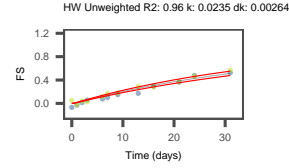

HCD2

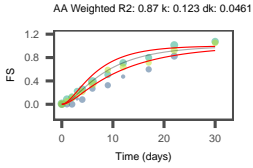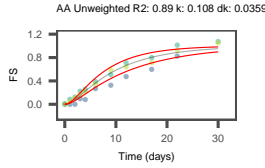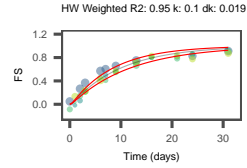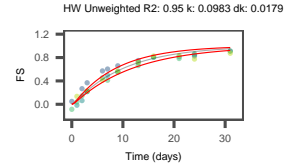

HCDH

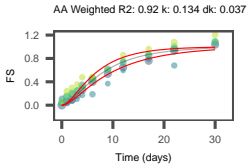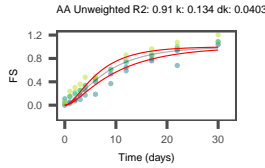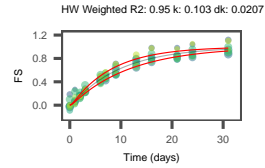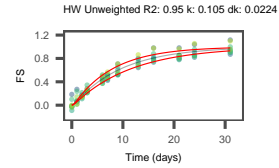

HEM2

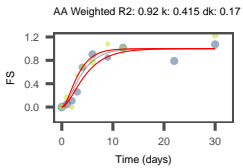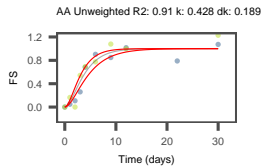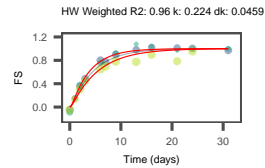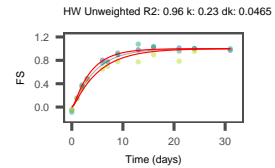

HEMH

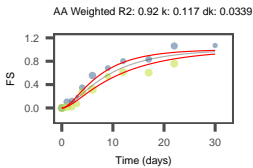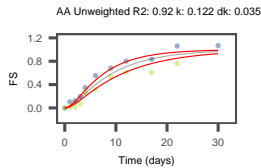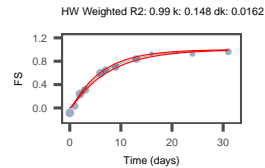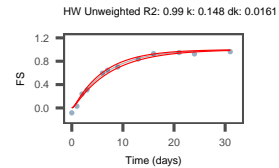

## HGD

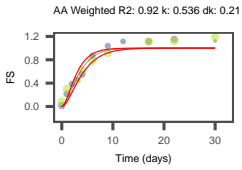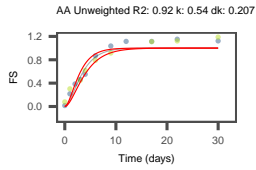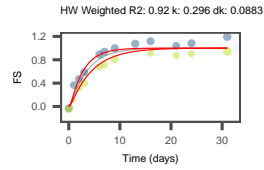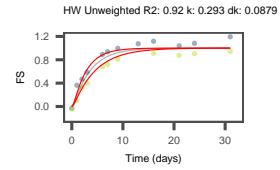

## HIBCH

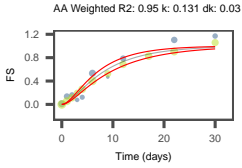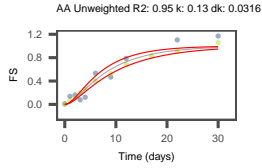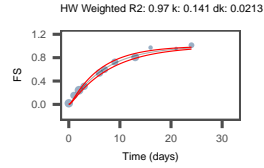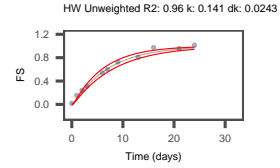

## HINT1

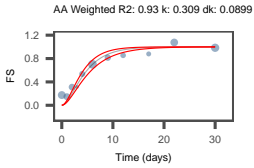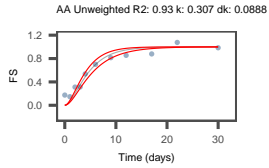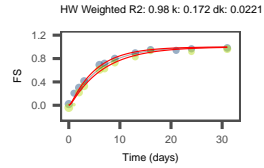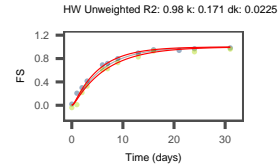

## HINT2

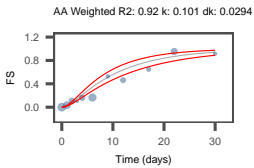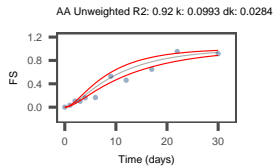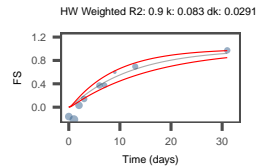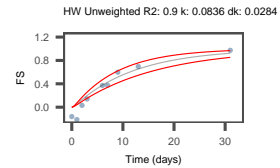

## HMGCL

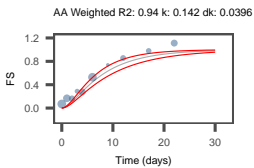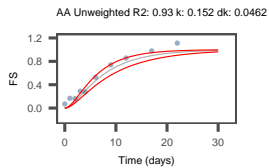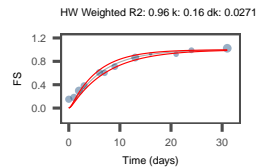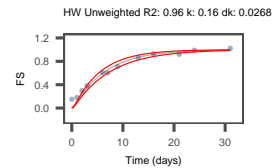

## HNRPK

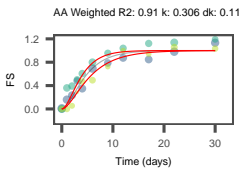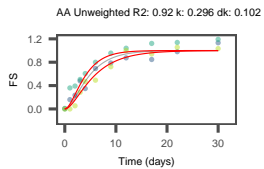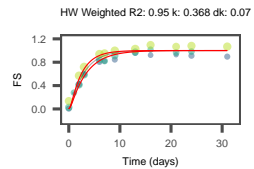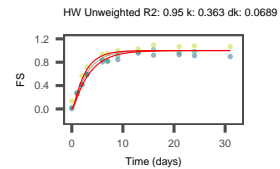

## HNRPL

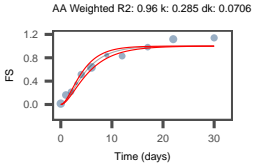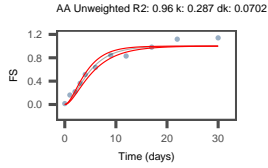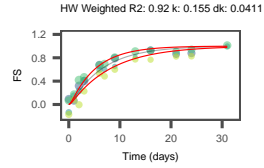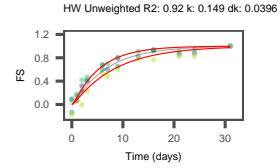

## HNRPU

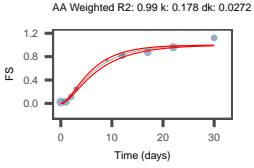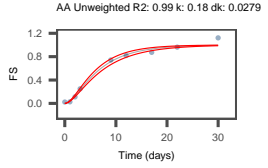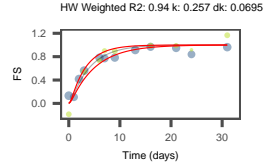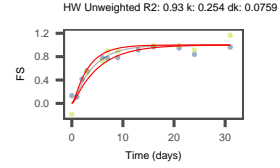

## HOGA1

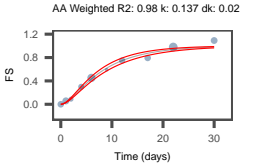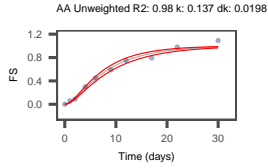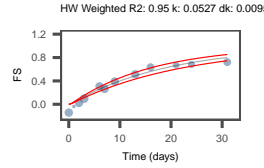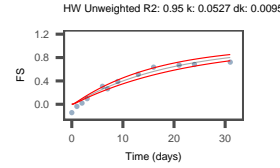

## HPRT

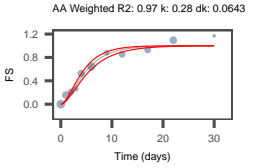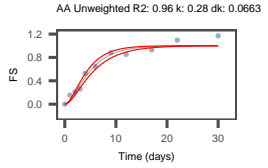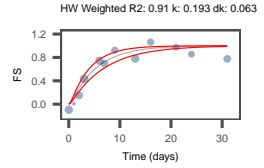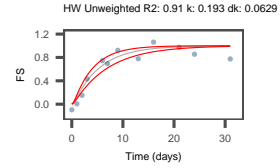

## HS90A

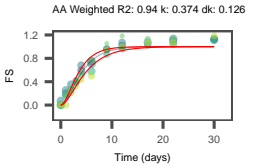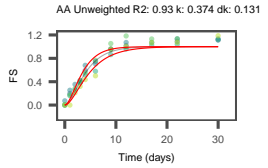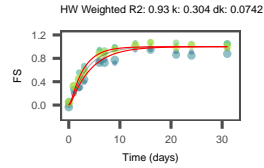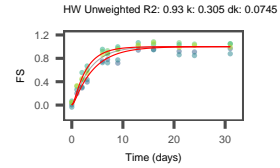

## HS90B

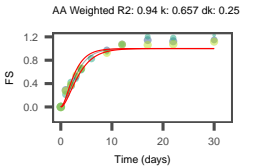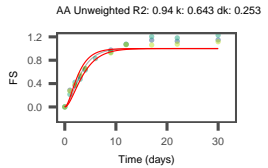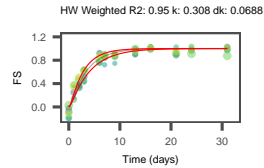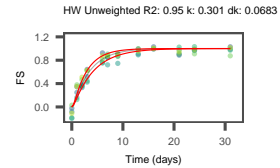

HSP74

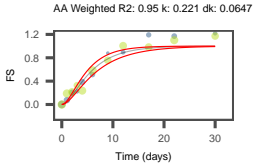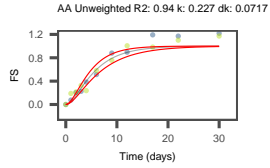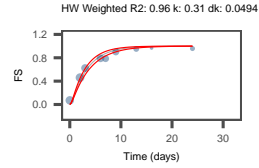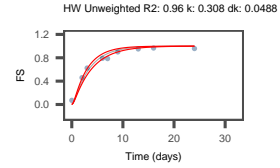

HSP7C

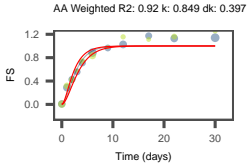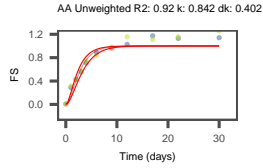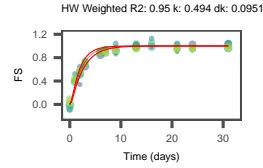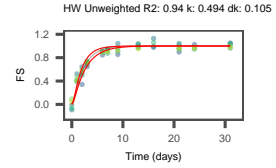

HYEP

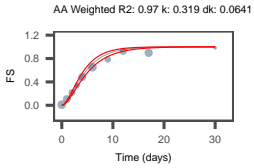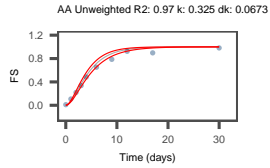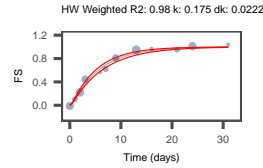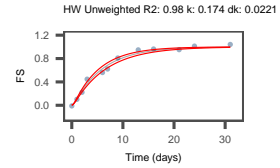

HYES

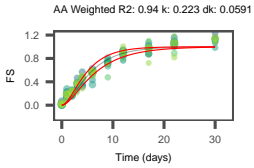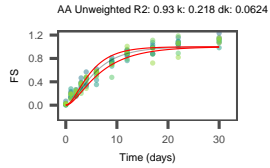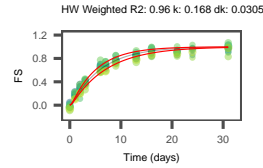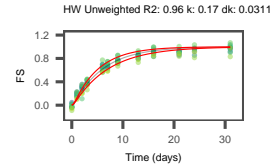

HYKK

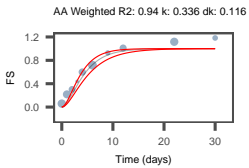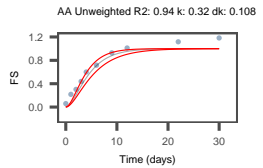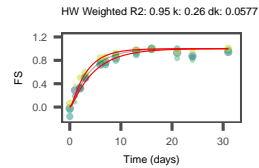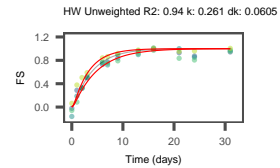

IAH1

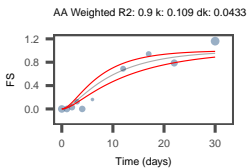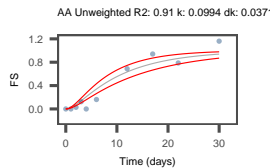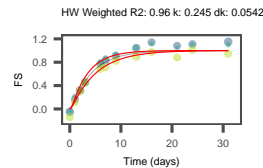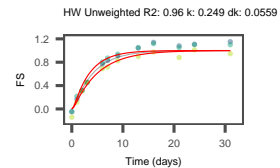

## IDHC

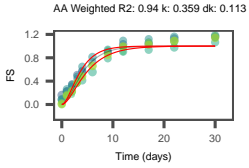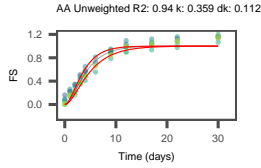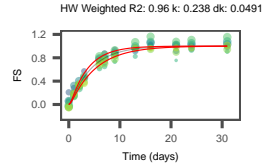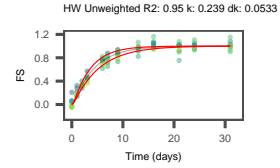

## IDHG1

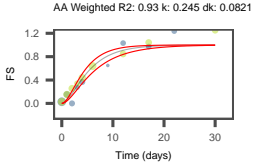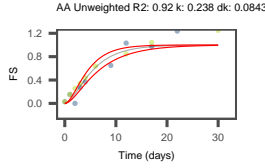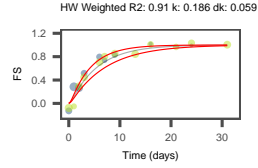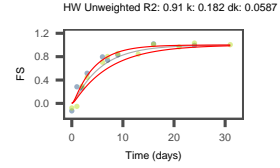

## IDHP

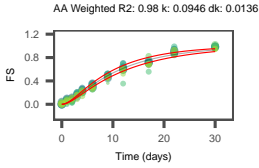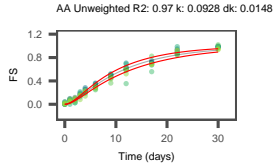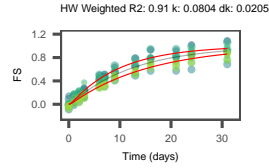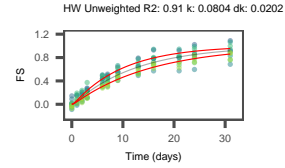

## IF4G1

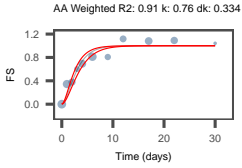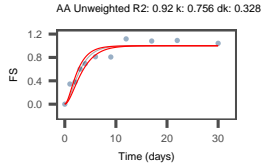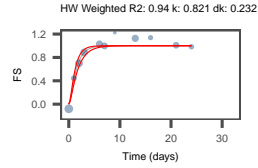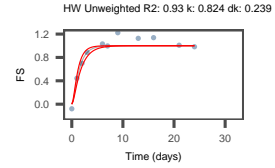

## ILK

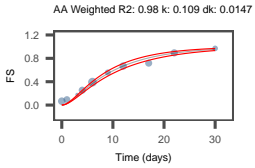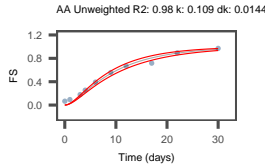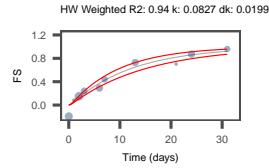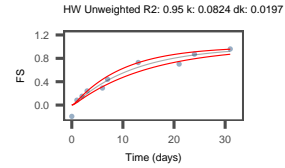

## INMT

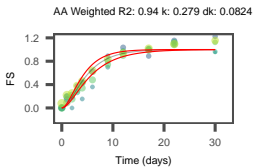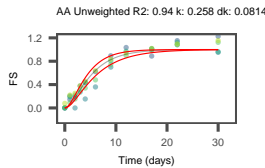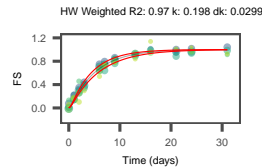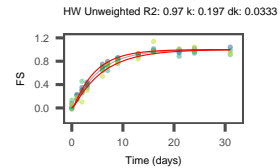

IPYR2

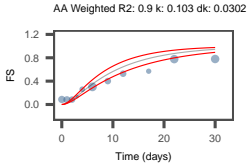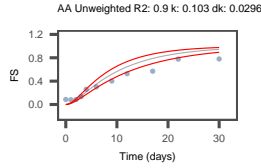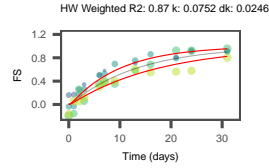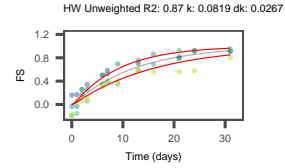

IQGA1

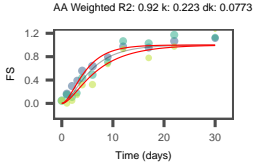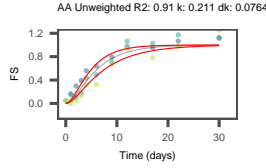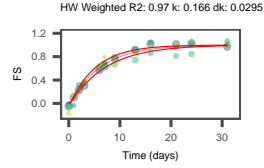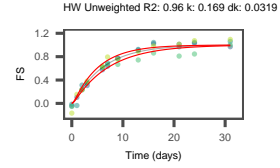

IRGM1

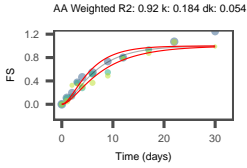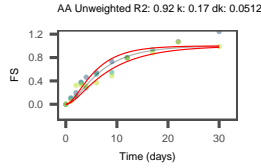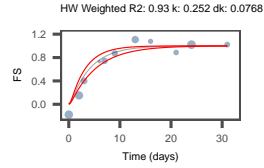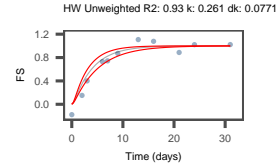

ISC2A

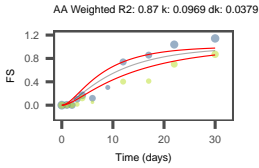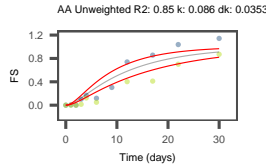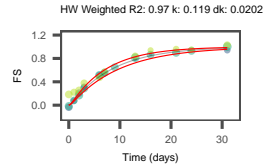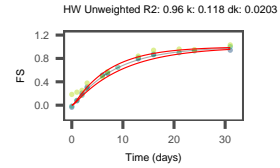

ITB1

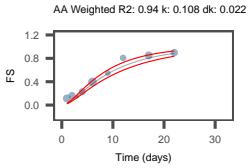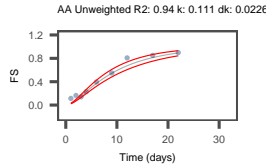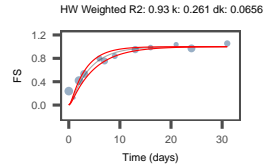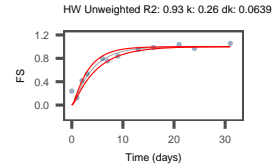

IVD

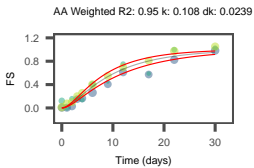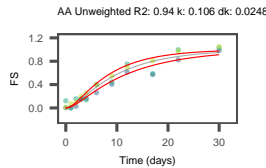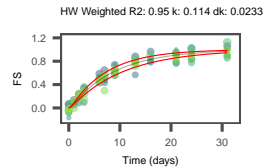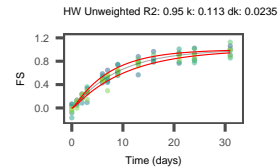



KAD2

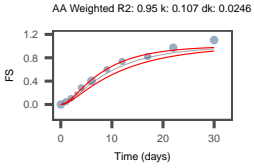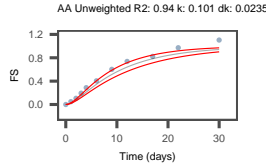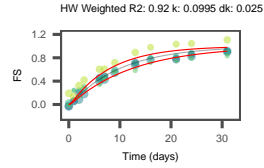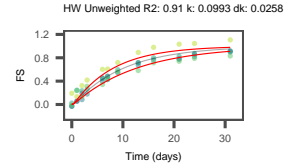

KAD3

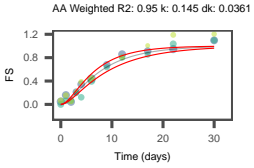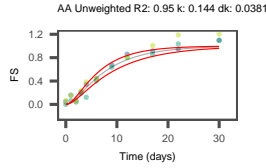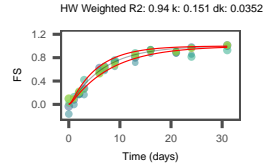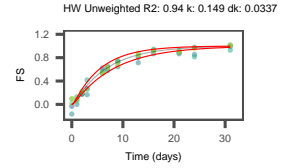

KAD4

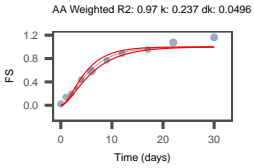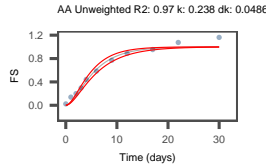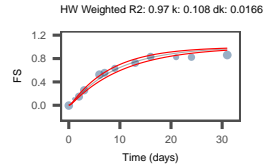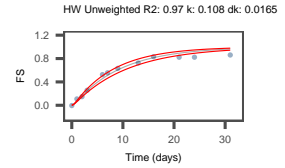

KAT1

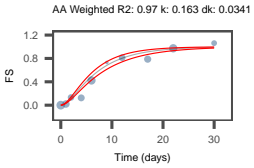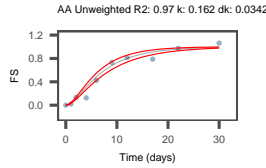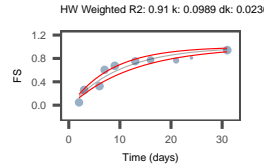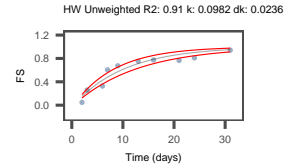

KAT3

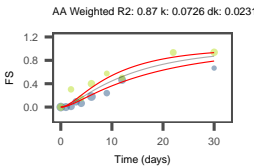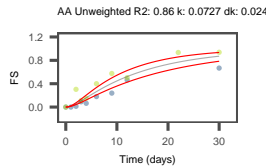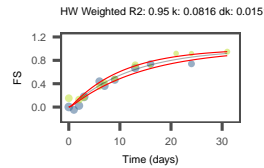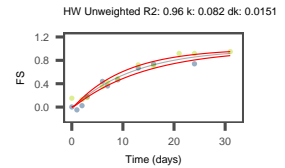

KCRU

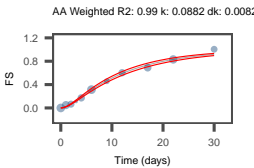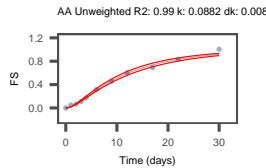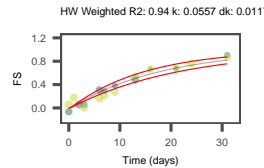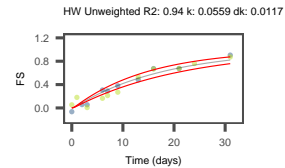

KEG1

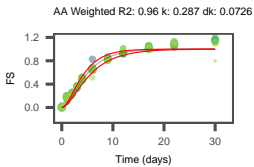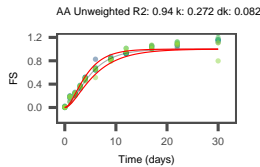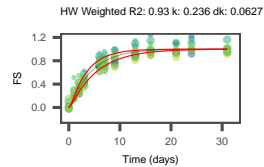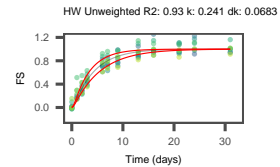

KHK

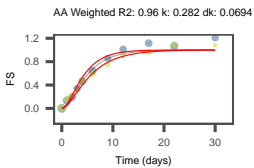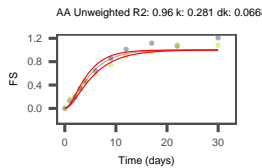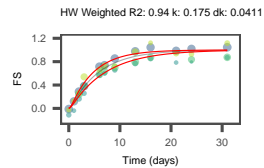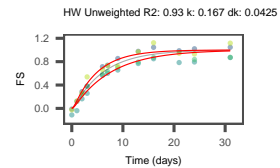

KMO

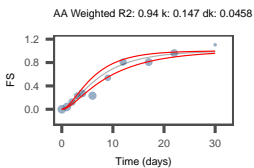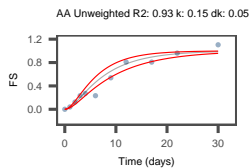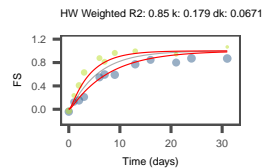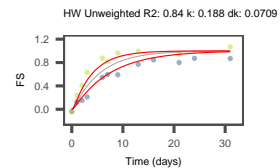

KPYM

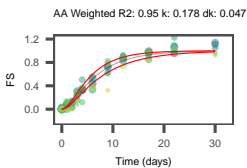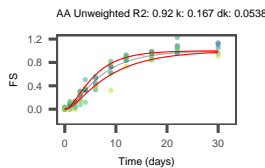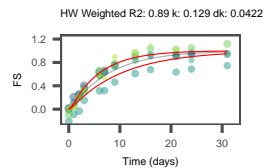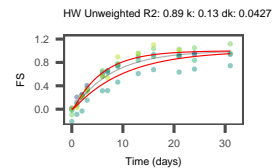

LA

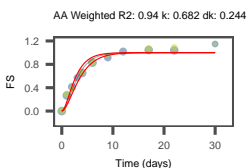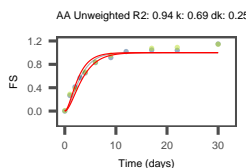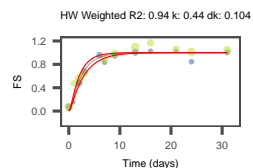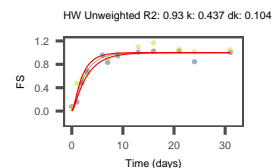

LACB2

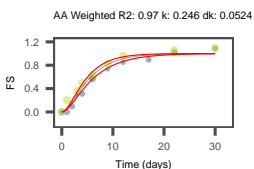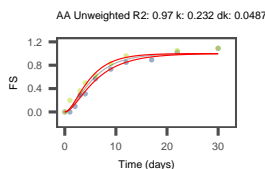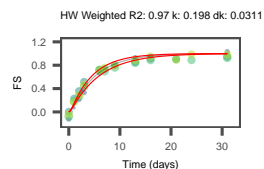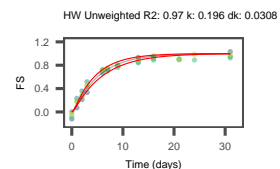

## LACTB

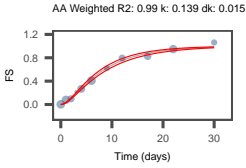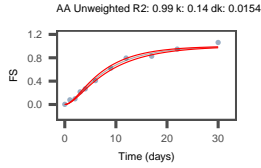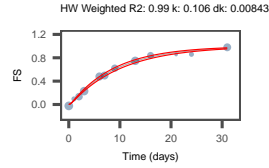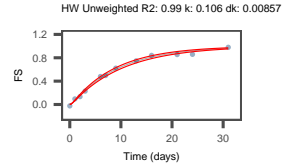

## LAD1

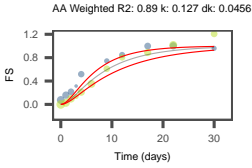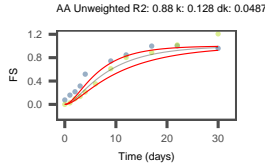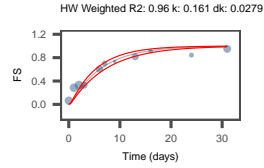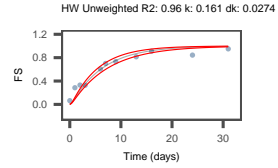

## LAT4

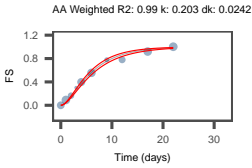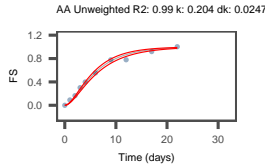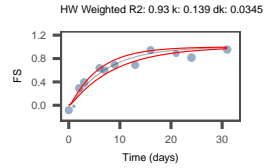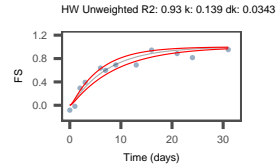

## LDHA

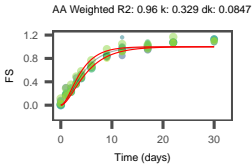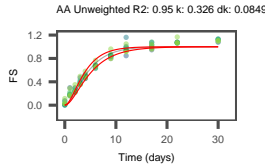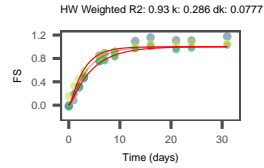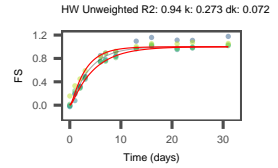

## LDHB

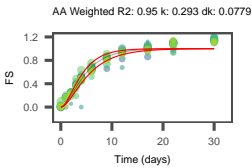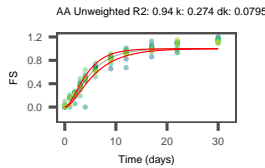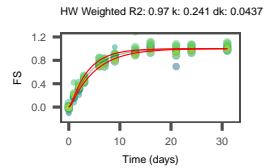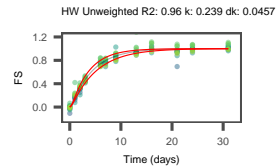

## LDHD

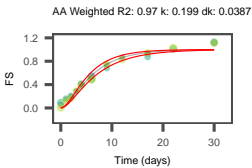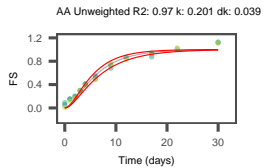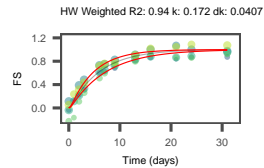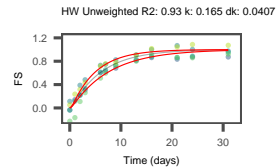

## LETM1

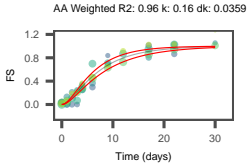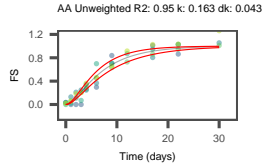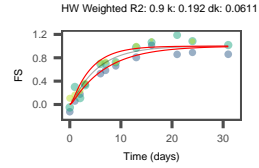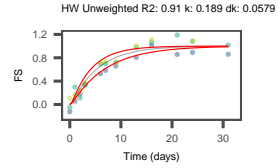

## LKHA4

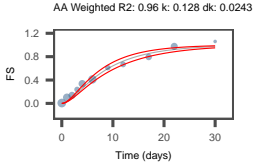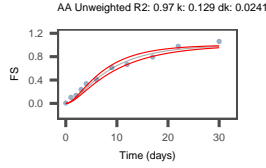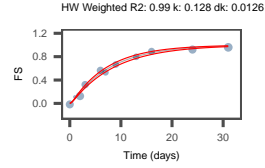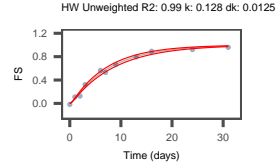

## LMNA

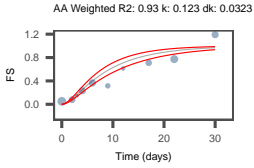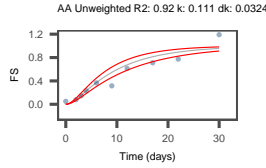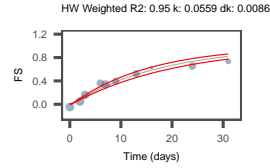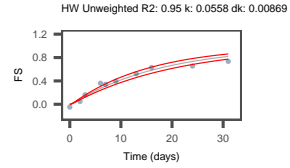

## LPPRC

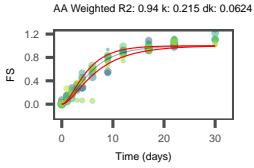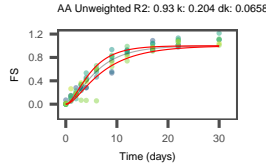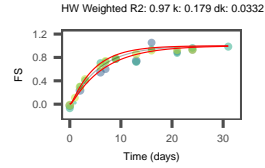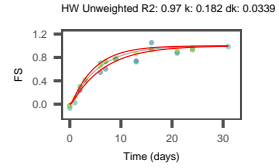

## LRC59

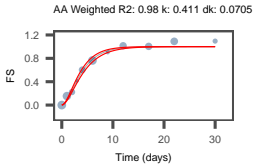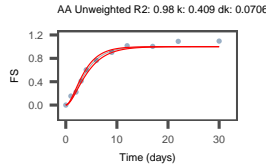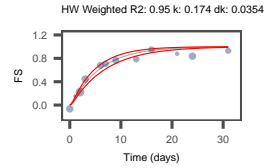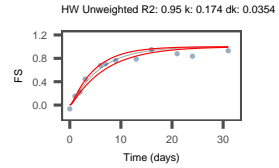

## LRP2

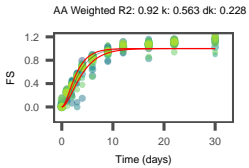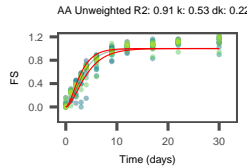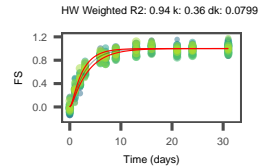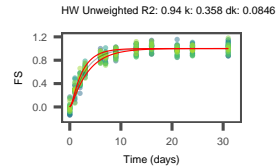

## M2GD

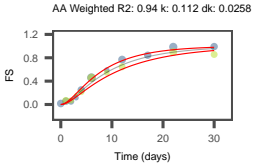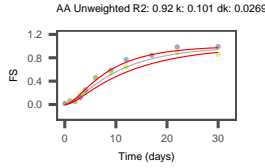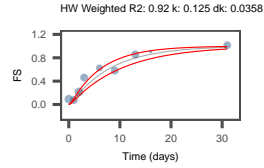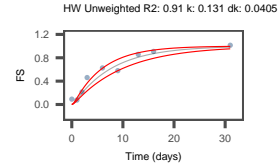

## M2OM

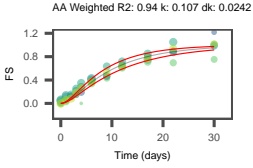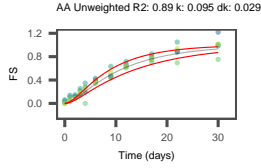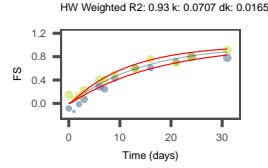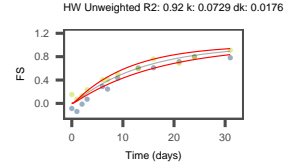

## MAAI

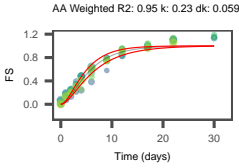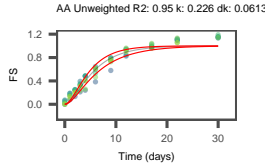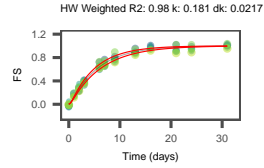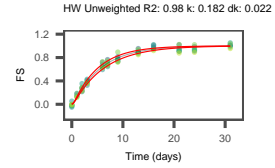

## MAOX

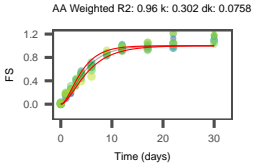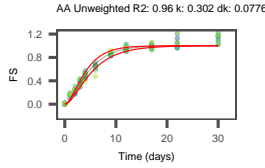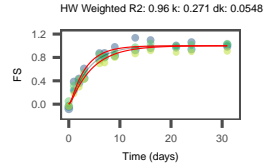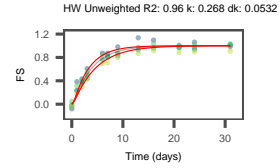

## MARC2

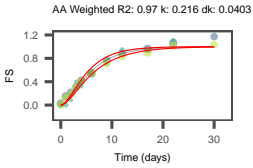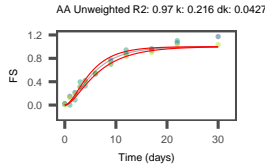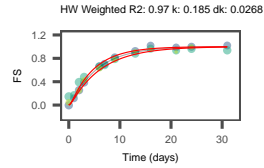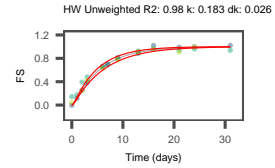

## MCCA

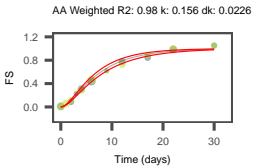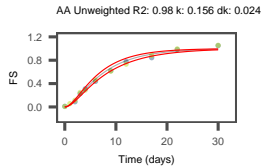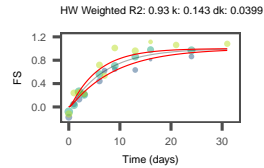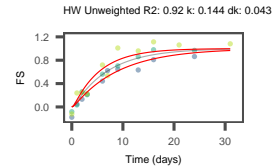

## MCCB

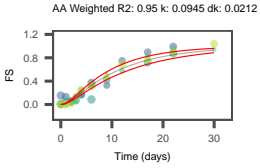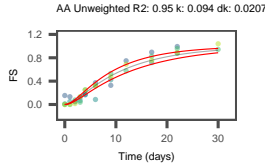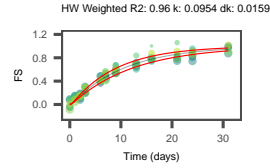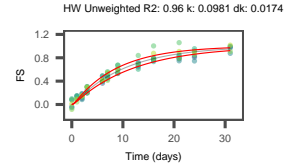

## MDHC

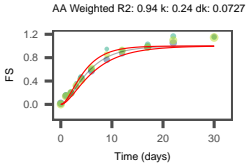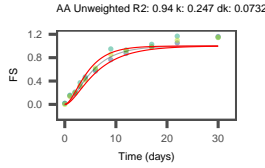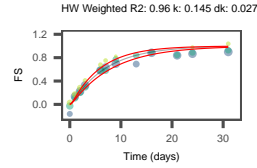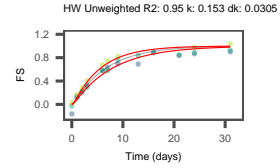

## MDHM

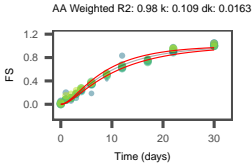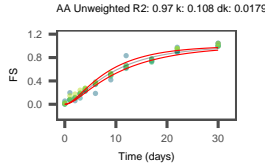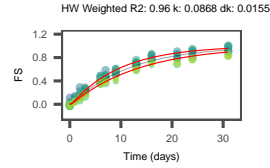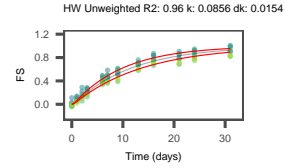

## MECP2

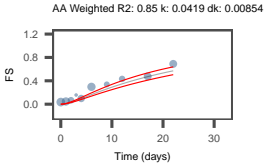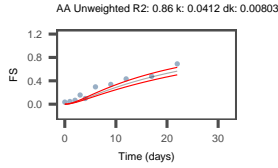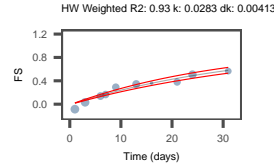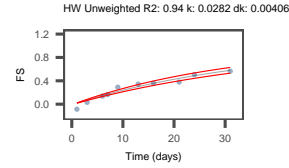

## MECR

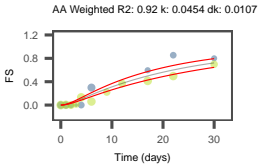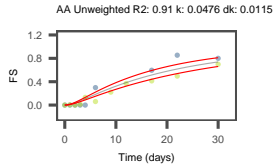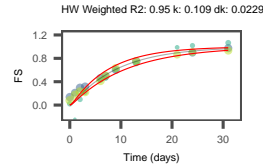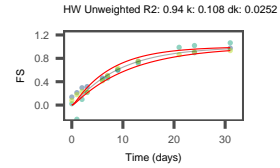

## MEP1A

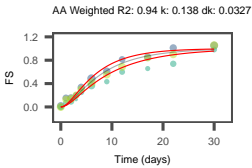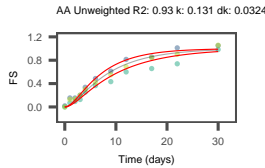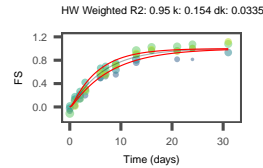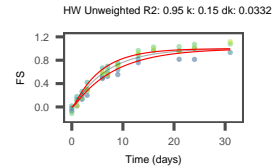

MEP1B

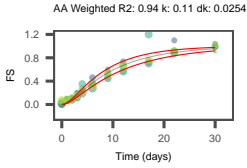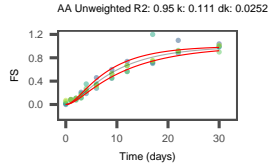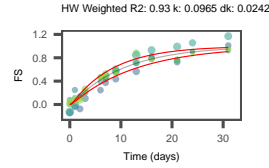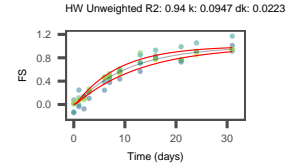

MIC13

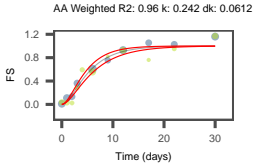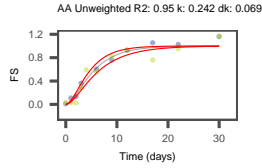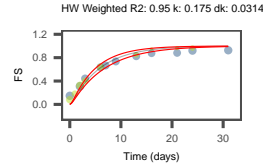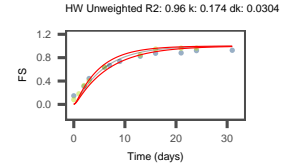

MIC19

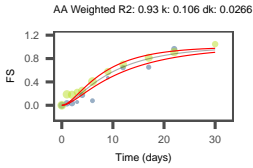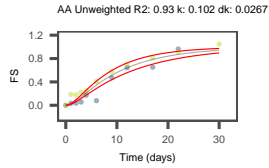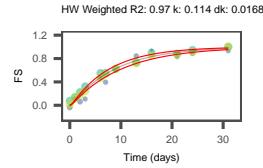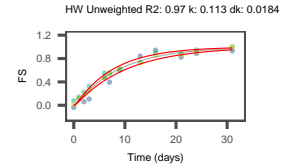

MIC26

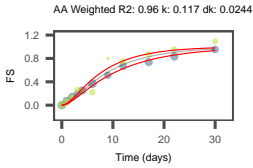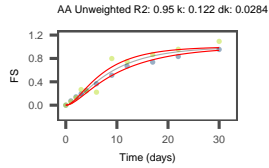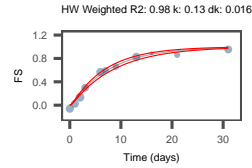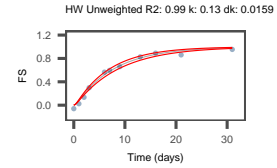

MIC27

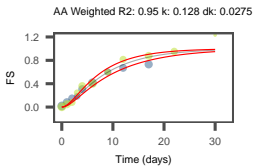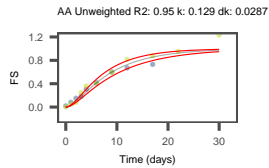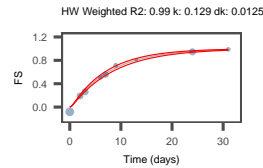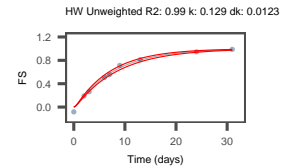

MIC60

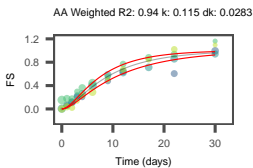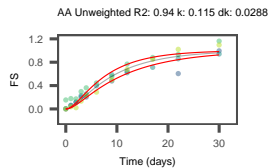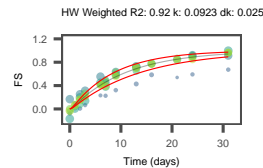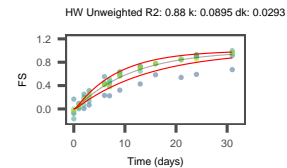

## MIF

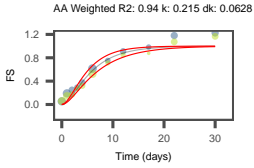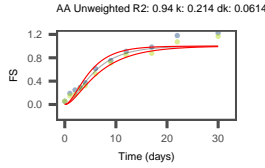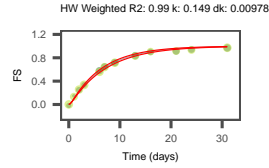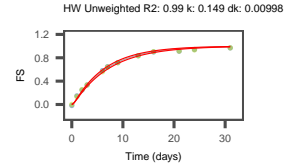

## MIOX

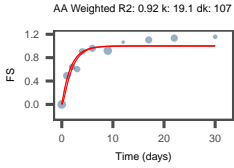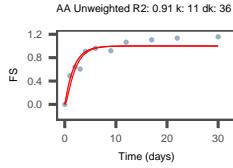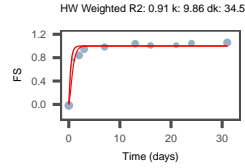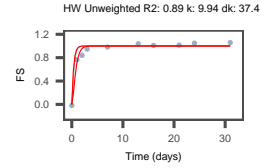

## MLEC

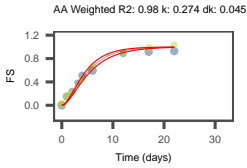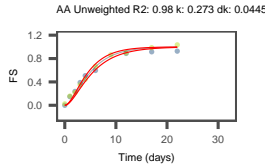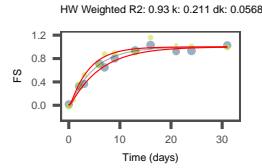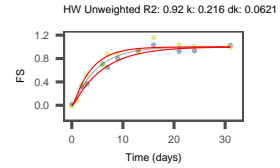

## MMSA

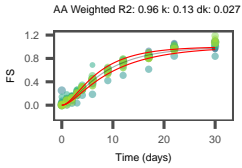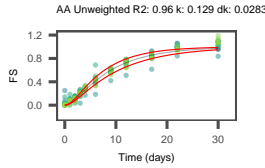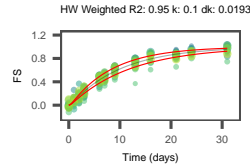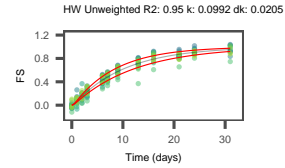

## MOES

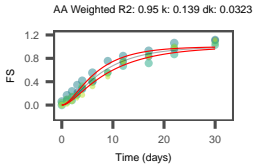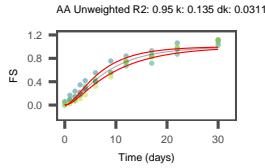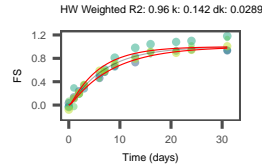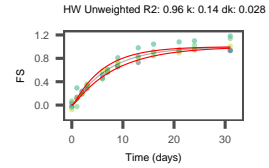

## MPC1

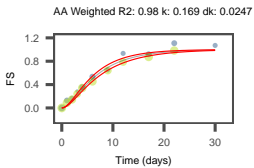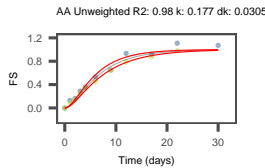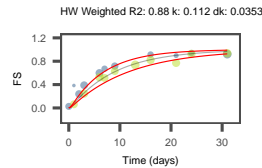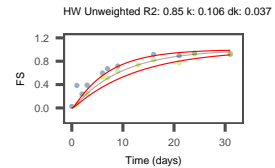



## MPCP

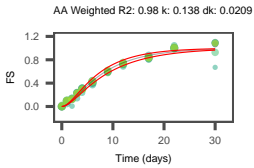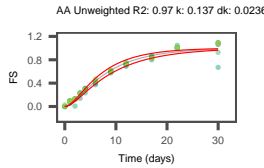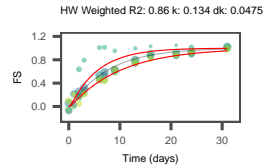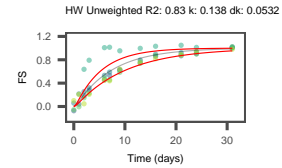

## MPU1

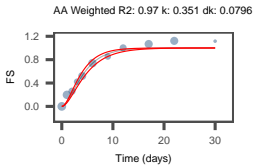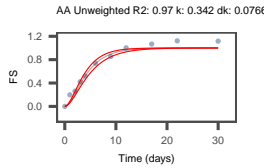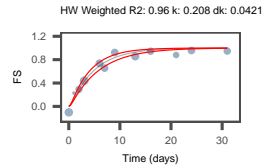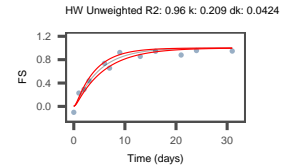

## MSRA

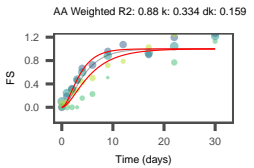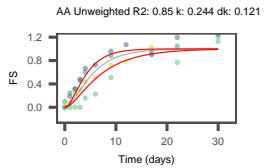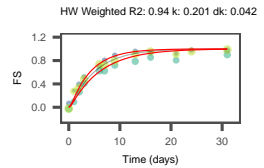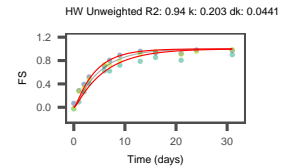

## MTL26

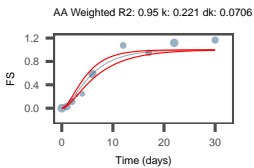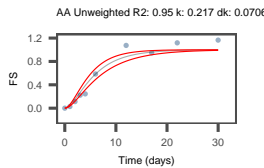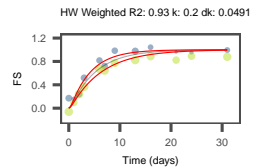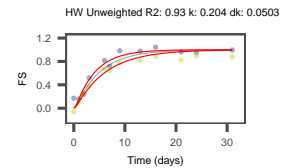

## MTX2

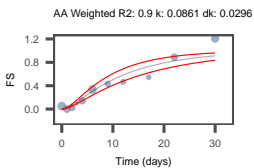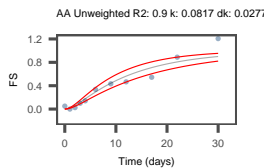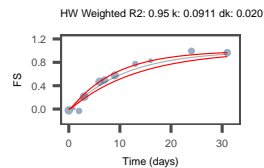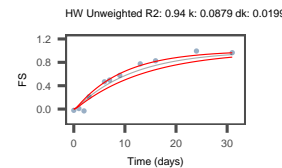

## MUTA

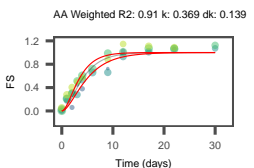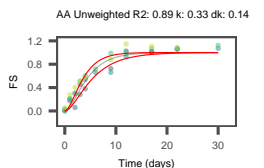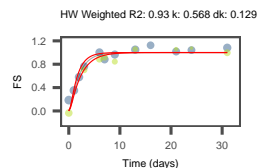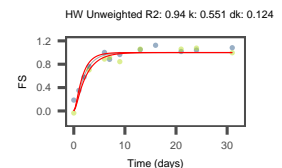

MYH9

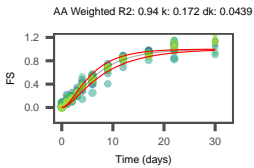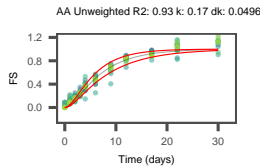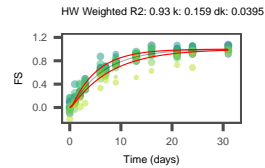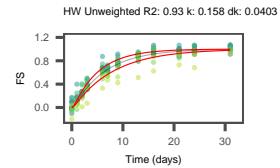

MYL6

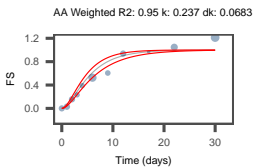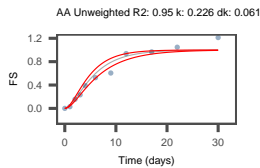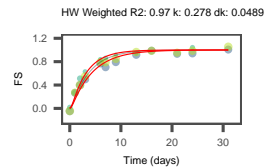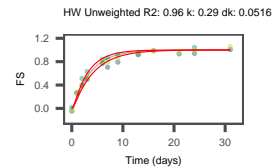

MYLK

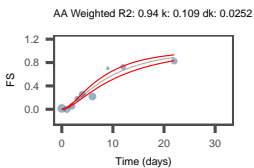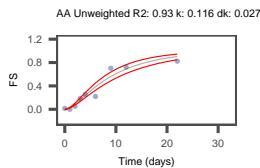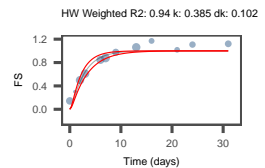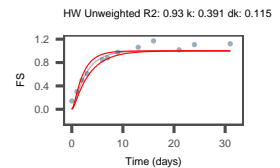

MYO1C

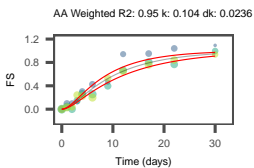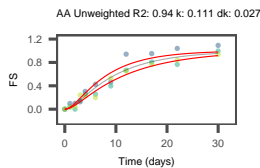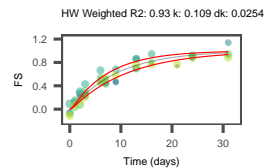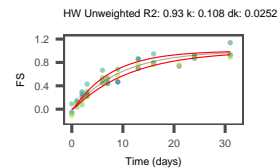

MYO6

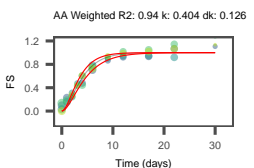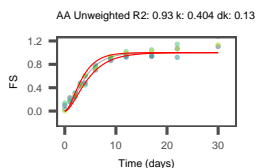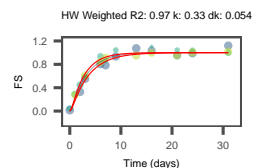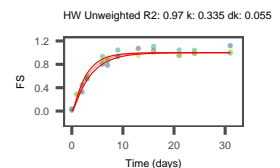

MYO7B

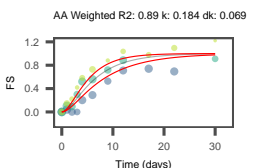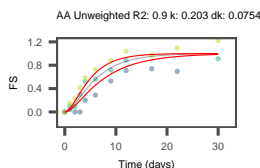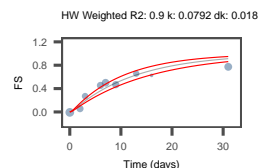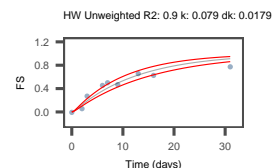

NBSR3

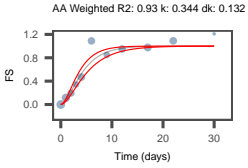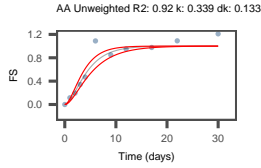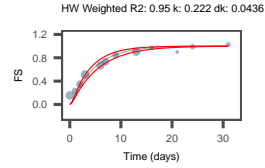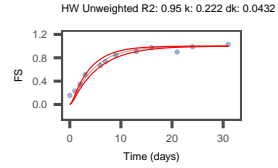

NCEH1

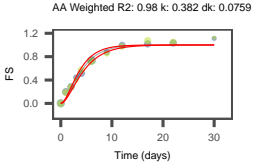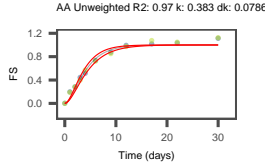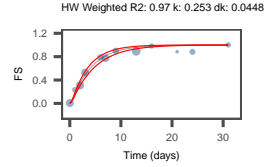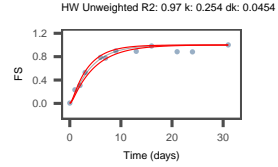

NCPR

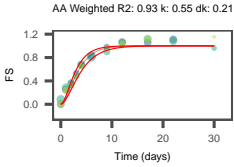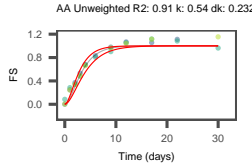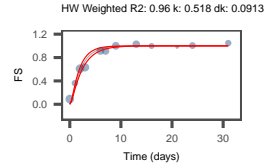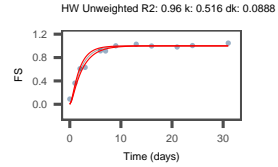

NDKA

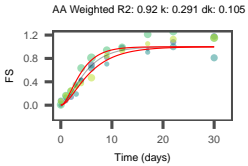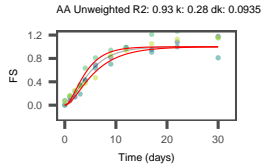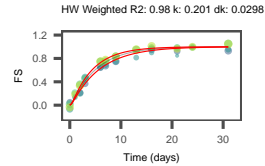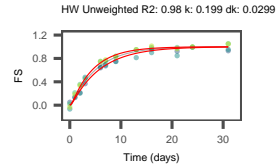

NDKB

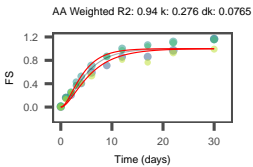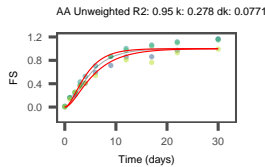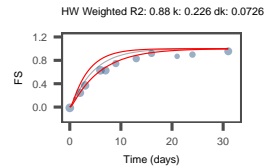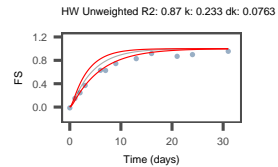

NDRG1

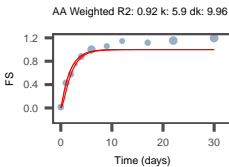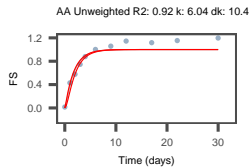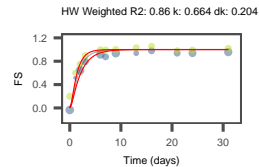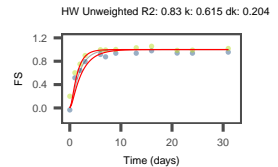

NDUA2

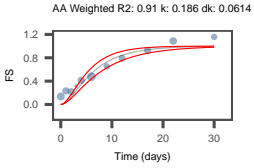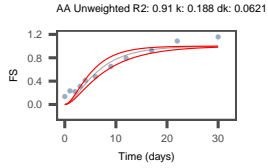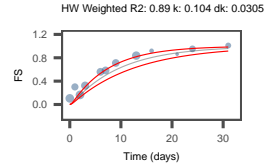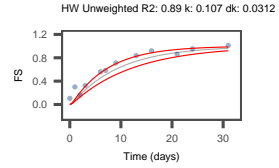

NDUA4

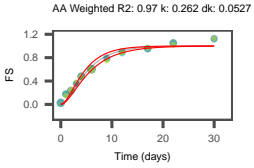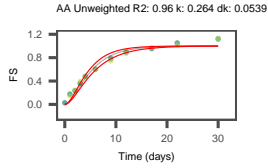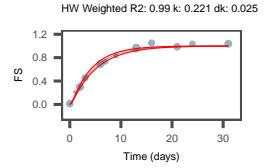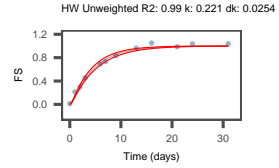

NDUA6

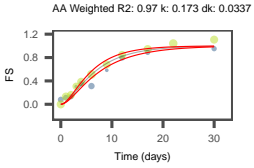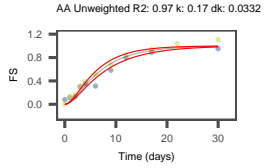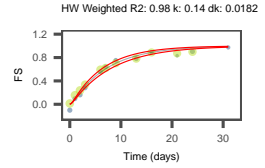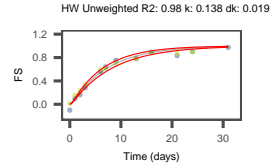

NDUA7

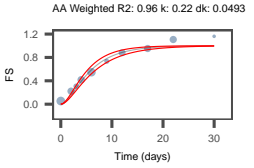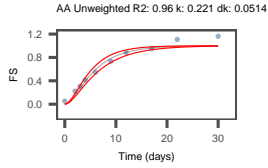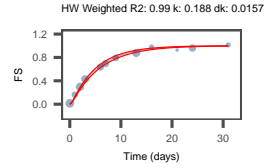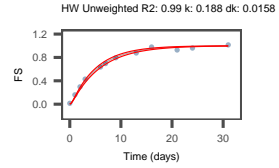

NDUA8

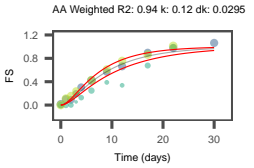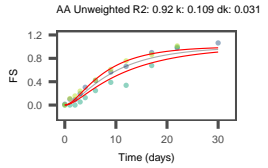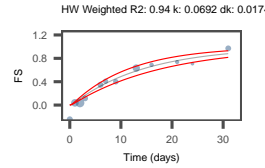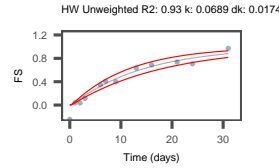

NDUA9

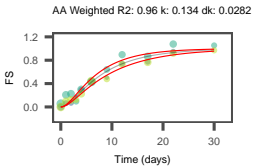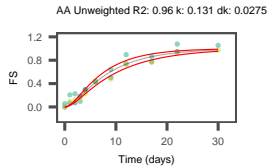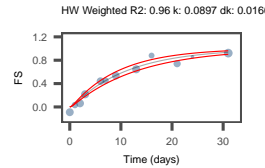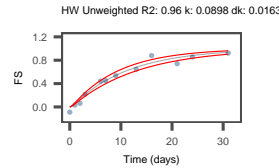

NDUAA

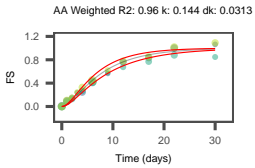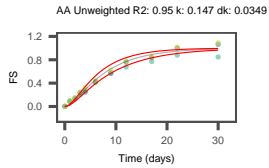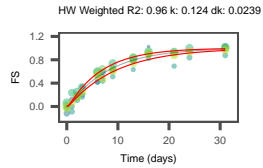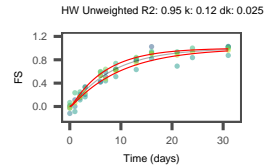

NDUAB

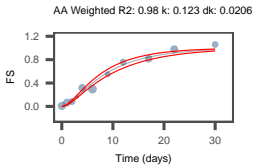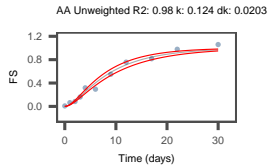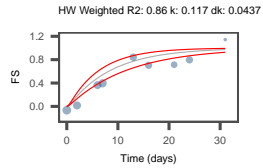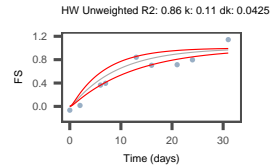

NDUAD

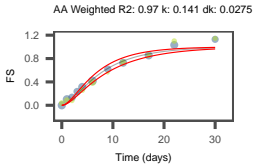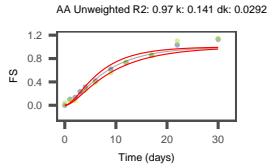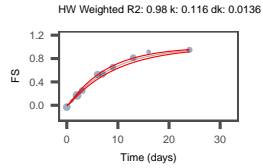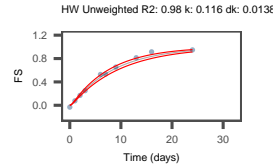

NDUB3

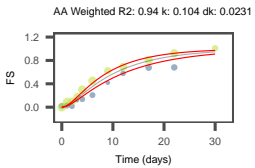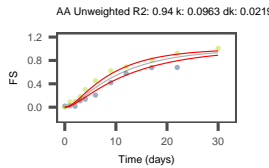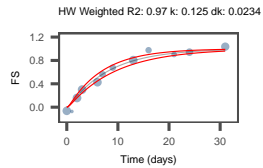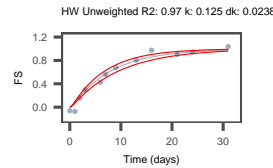

NDUB5

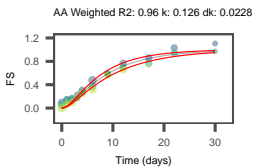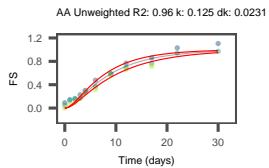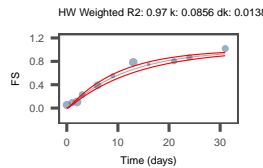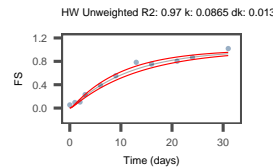

NDUB9

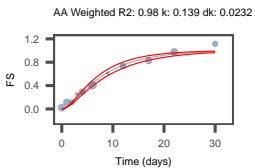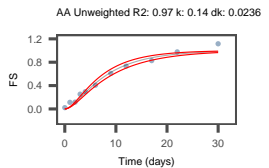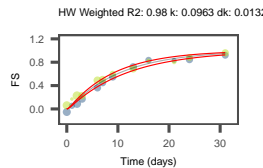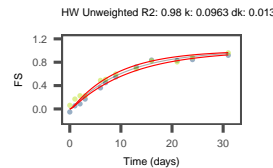

## NDUBB

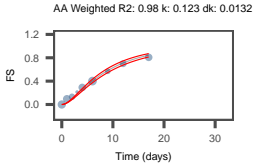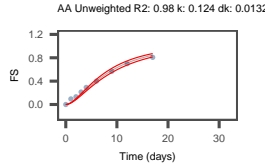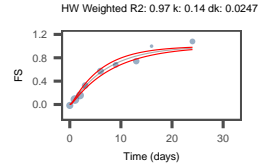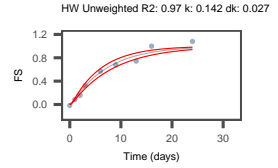

## NDUC2

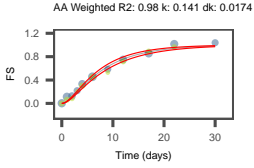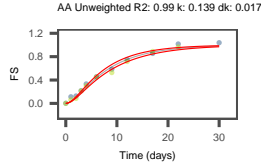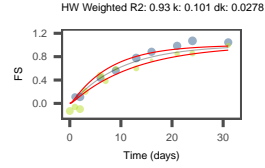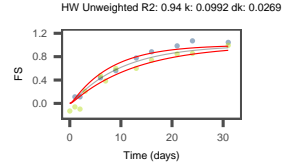

## NDUS1

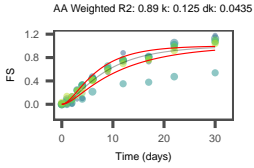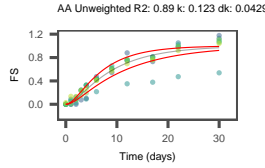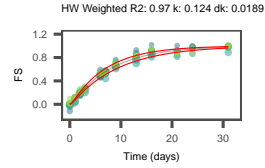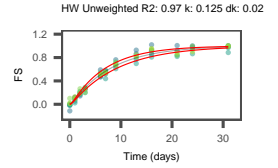

## NDUS2

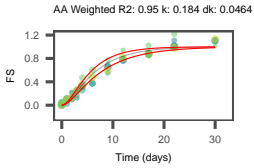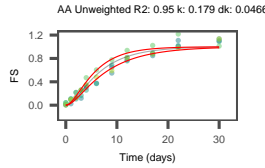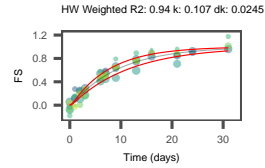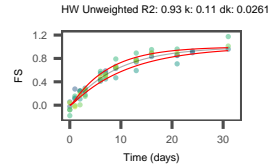

## NDUS3

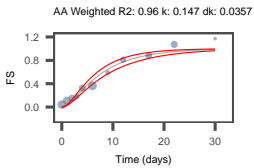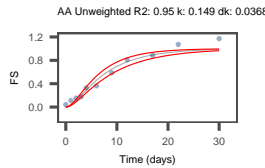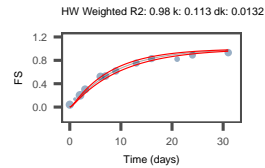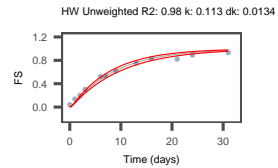

## NDUS4

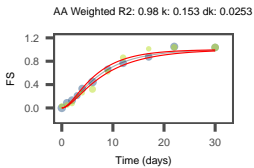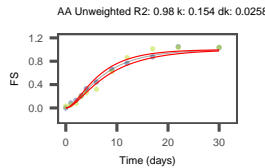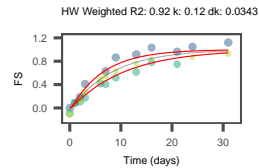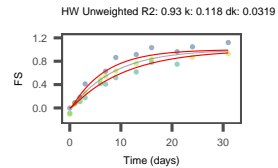

## NDUS6

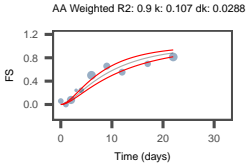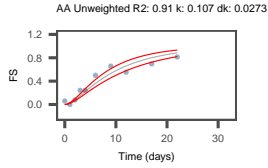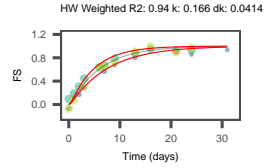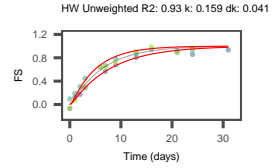

## NDUV1

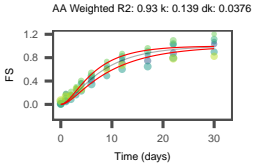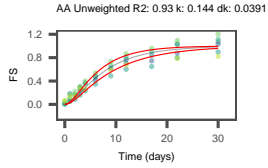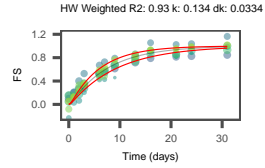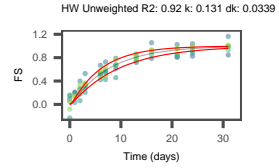

## NDUV2

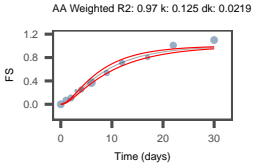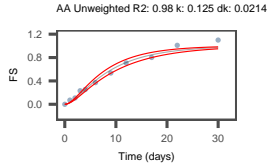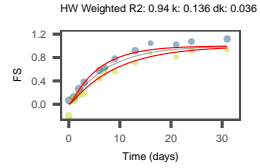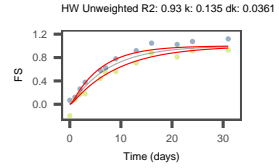

## NEP

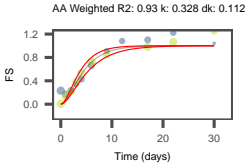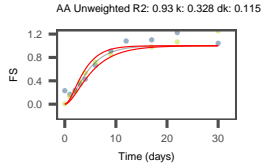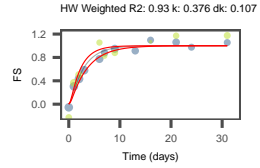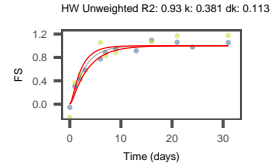

## NFS1

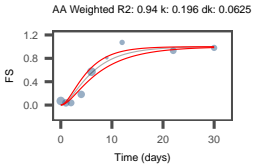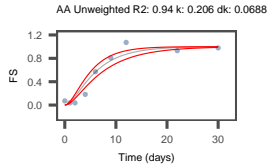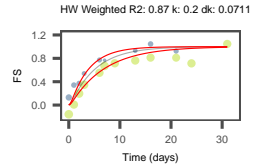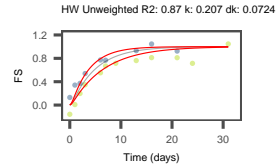

## NHRF3

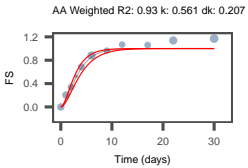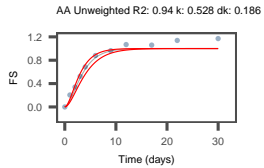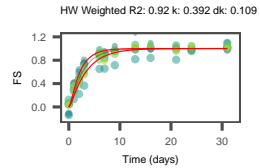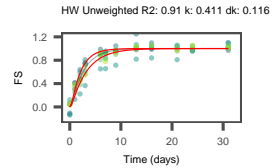

## NIPS1

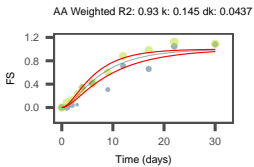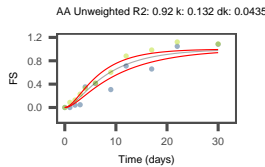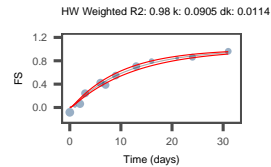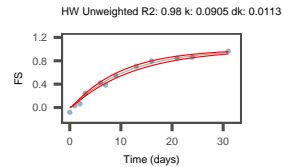

## NIT2

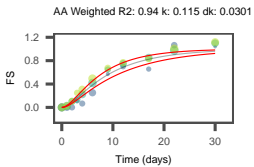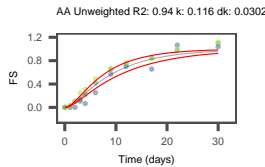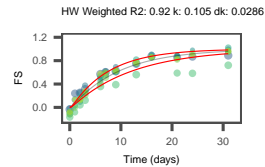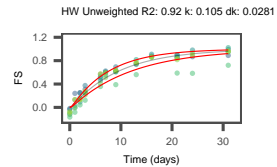

## NMT1

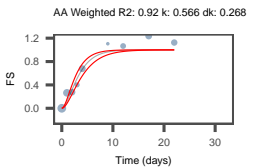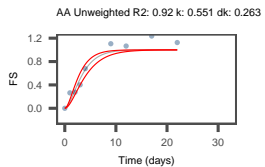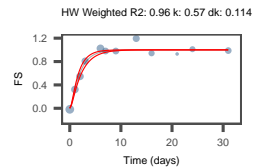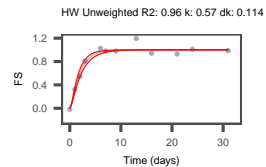

## NNRD

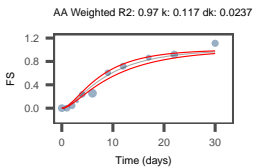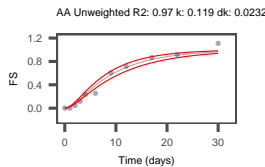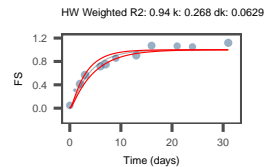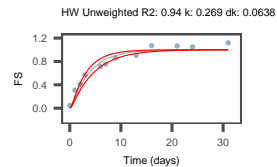

## NNRE

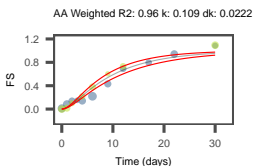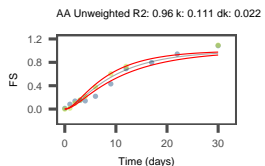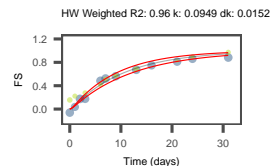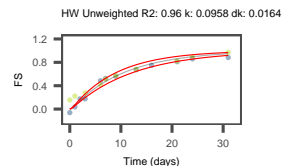

## NNTM

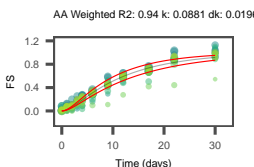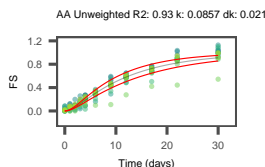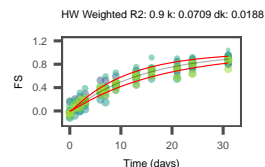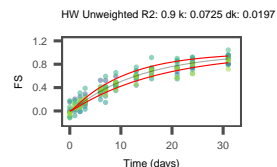



NQ01

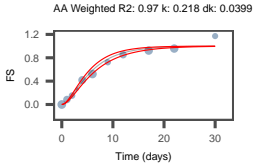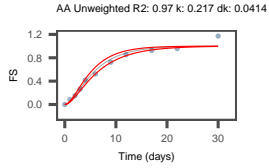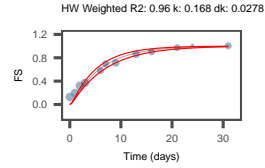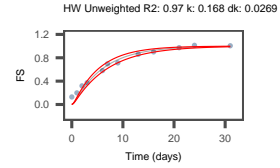

NU4M

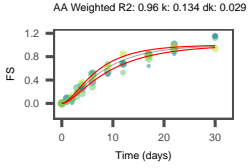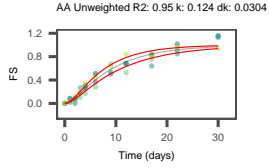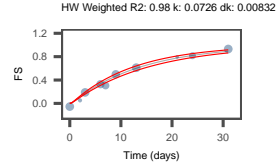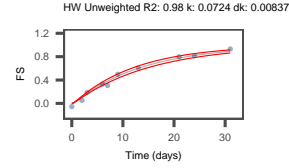

NU5M

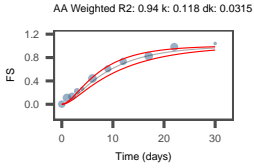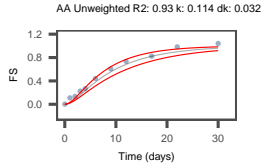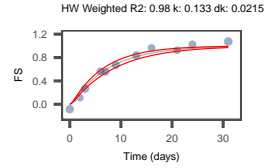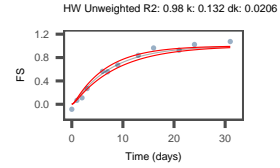

NUD19

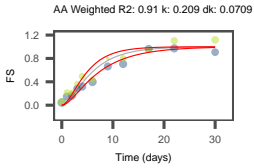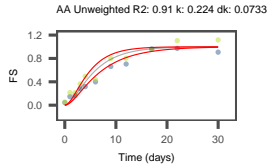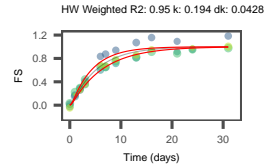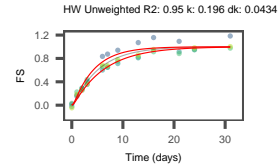

OCTC

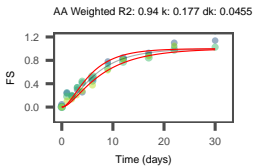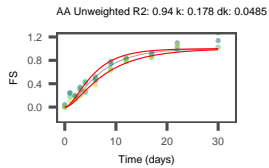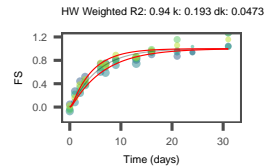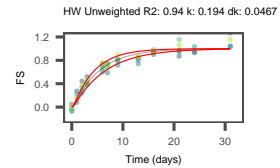

ODB2

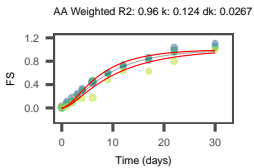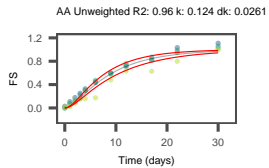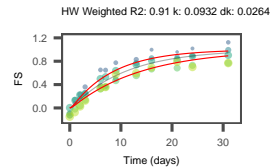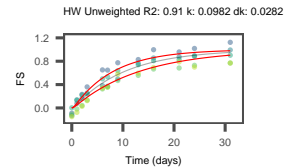

ODBA

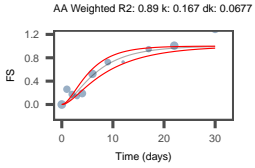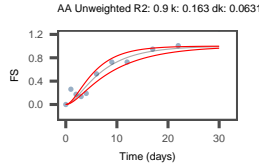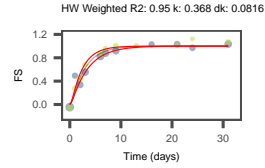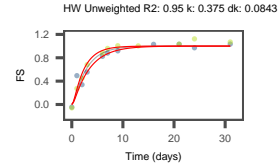

ODBB

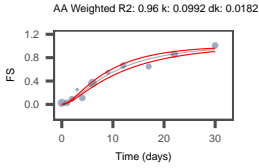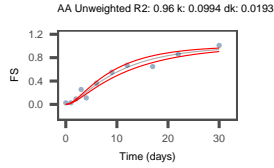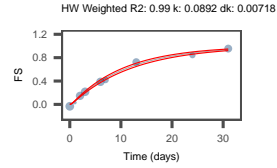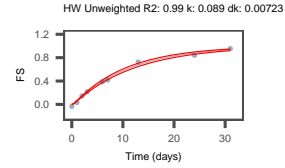

ODC

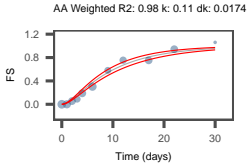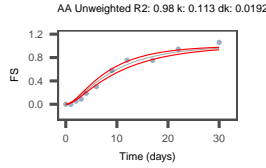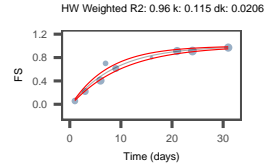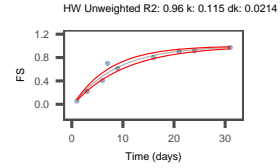

ODO1

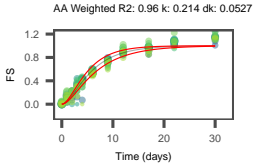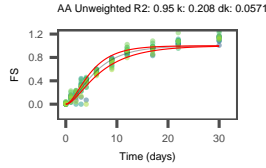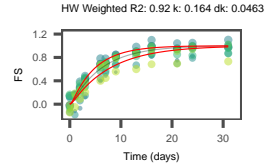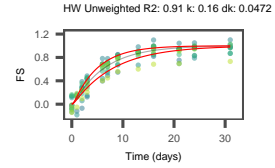

ODO2

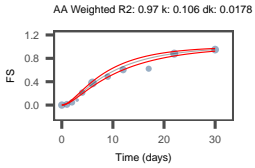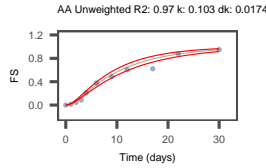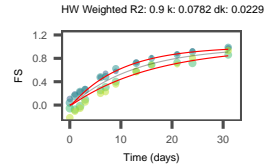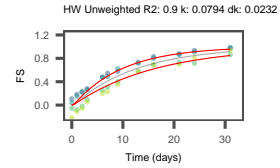

ODP2

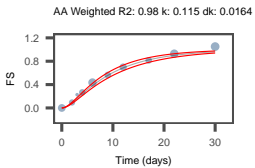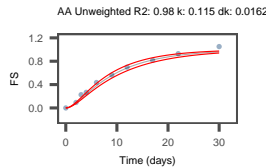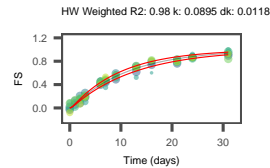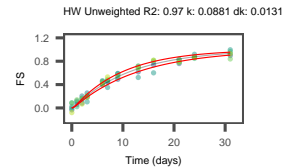

## ODPA

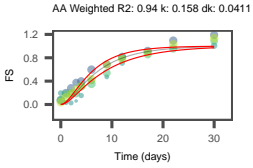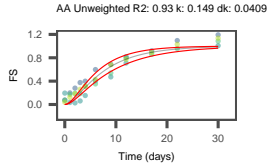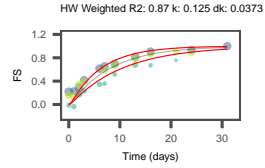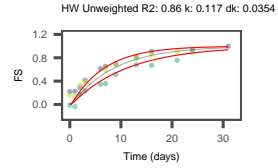

## ODPB

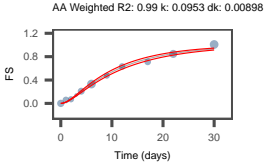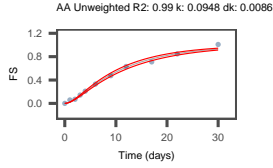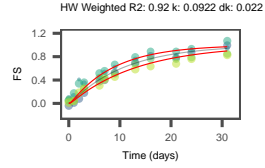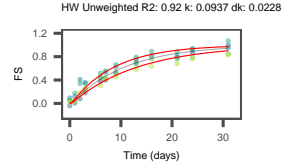

## ODPX

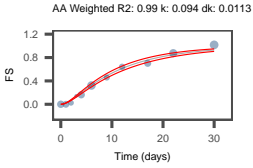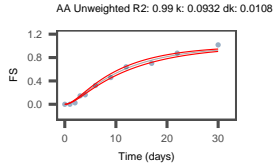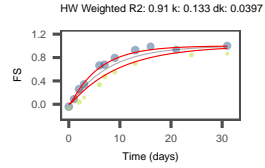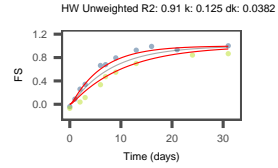

## OPA1

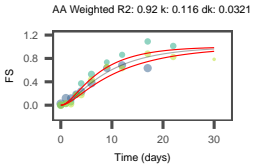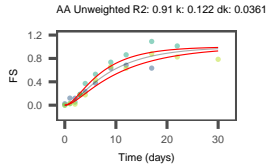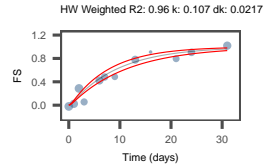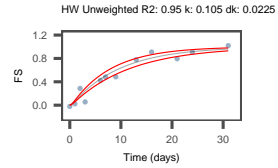

## ORNT1

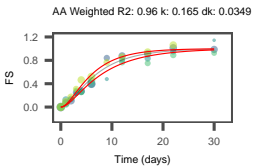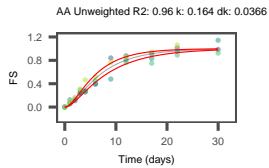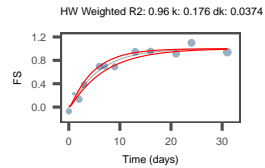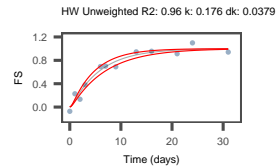

## OXDA

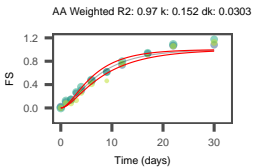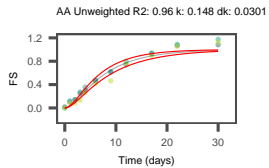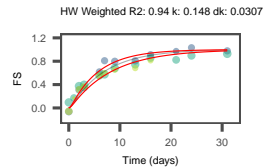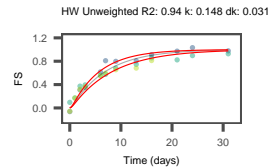

## PA2G4

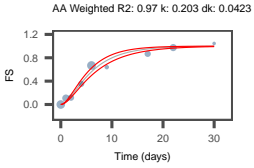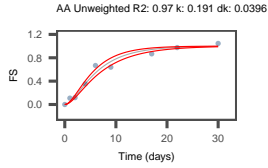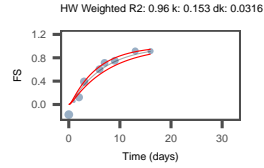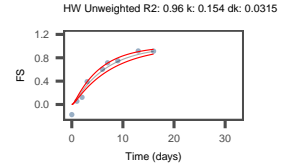

## PARK7

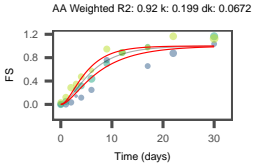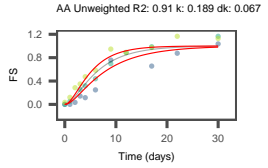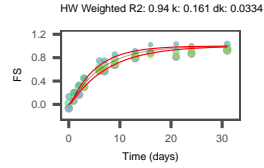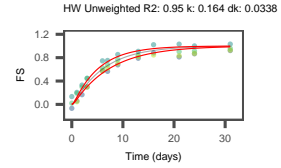

## PCBP2

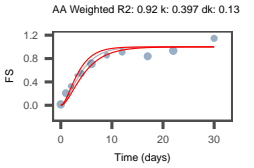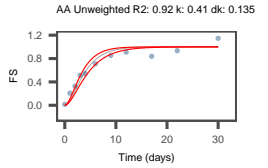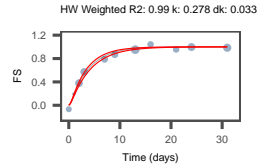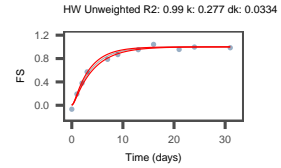

## PCCA

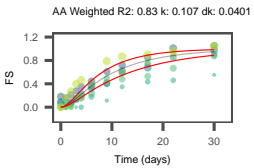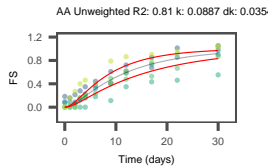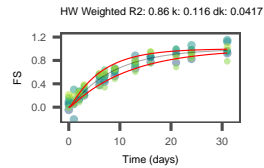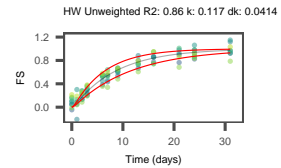

## PCCB

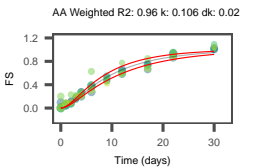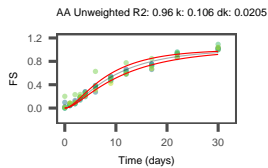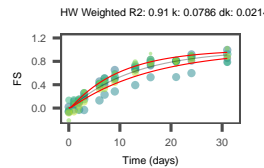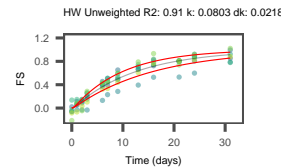

## PCKGC

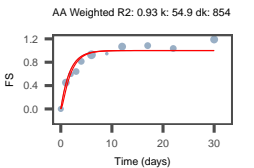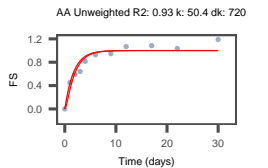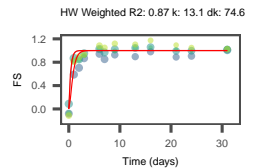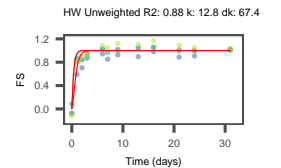

PDC6I

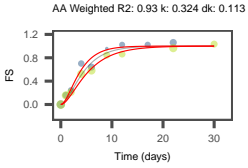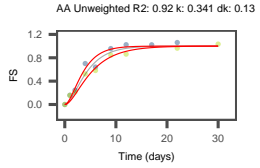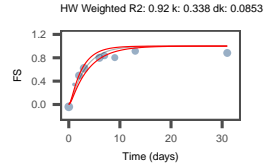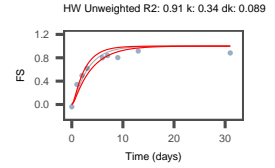

PDI1

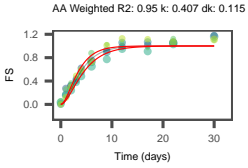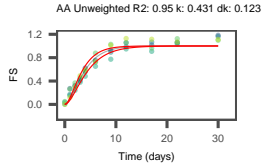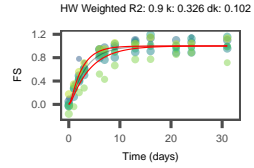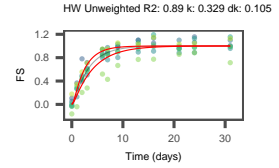

PDI3

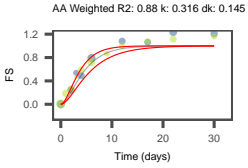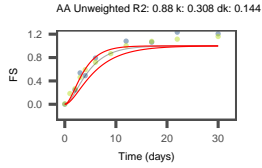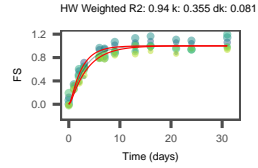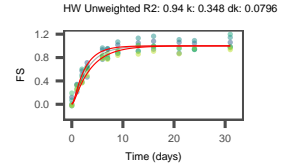

PEBP1

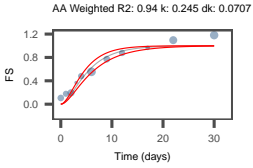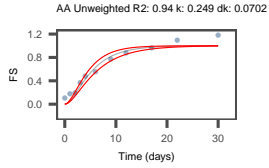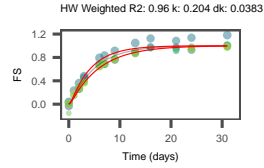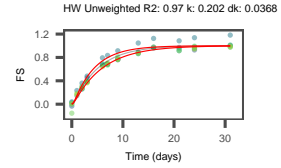

PECR

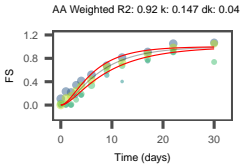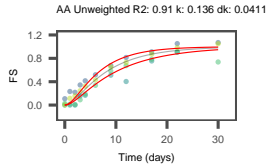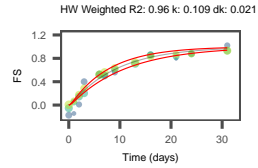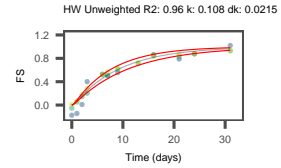

PGAM1

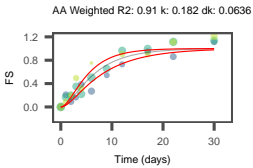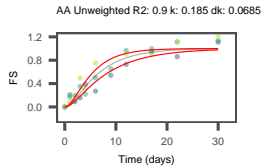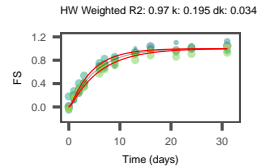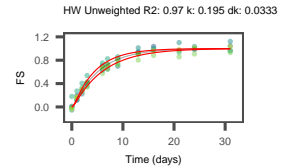

## PGAM2

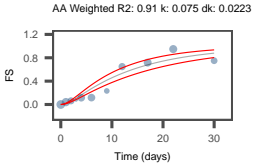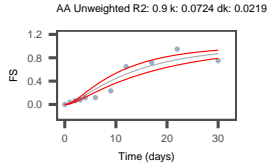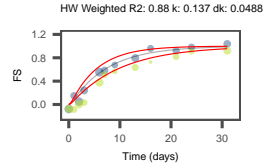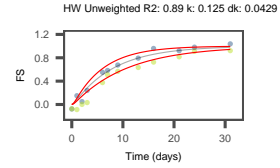

## PGBM

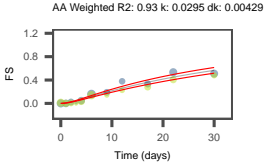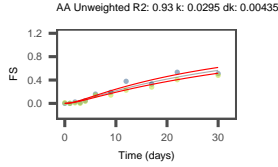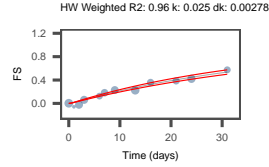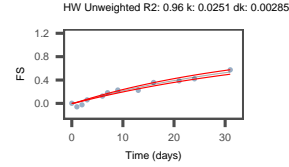

## PGK1

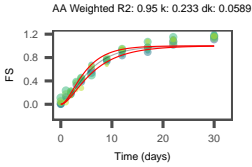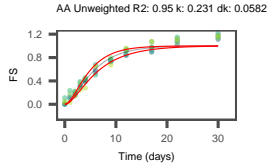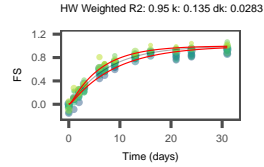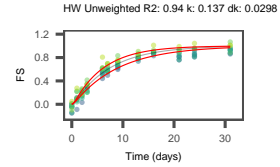

## PGM1

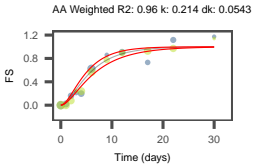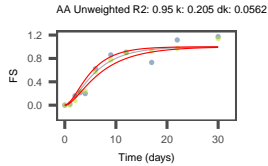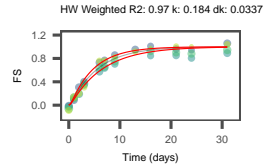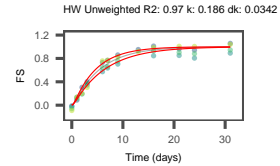

## PH4H

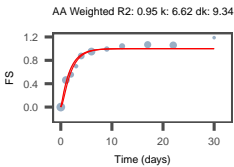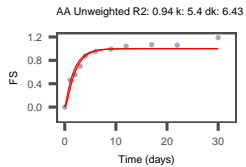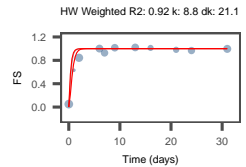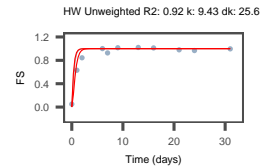

## PHB

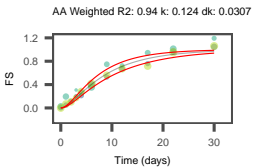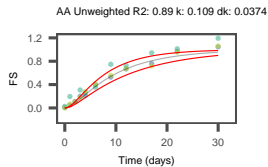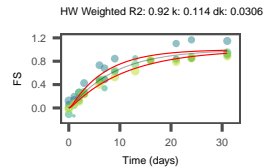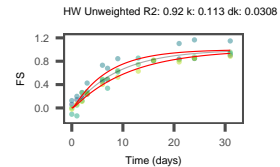

## PHB2

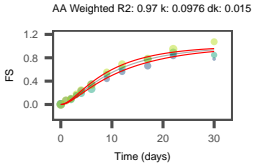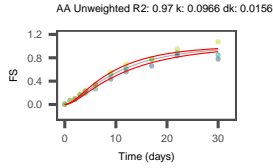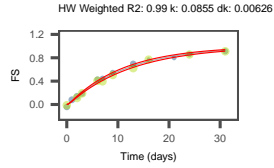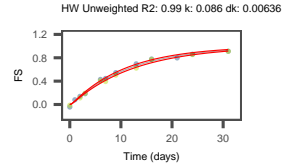

## PICAL

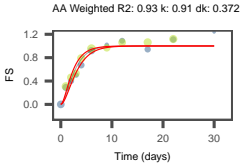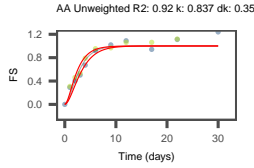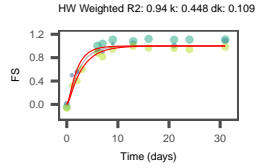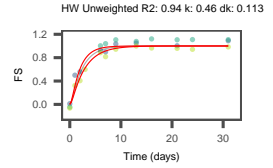

## PLSI

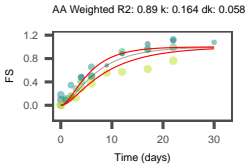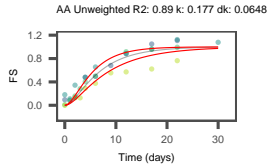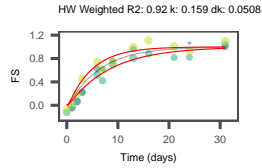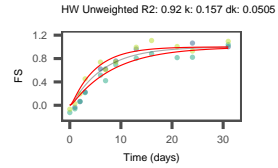

## PLSL

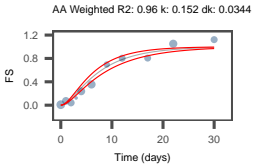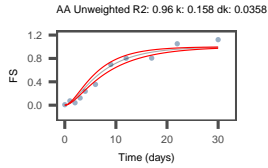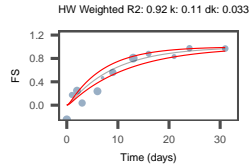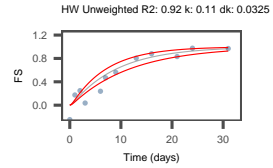

## PLST

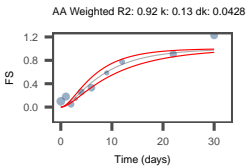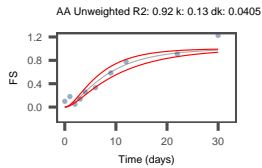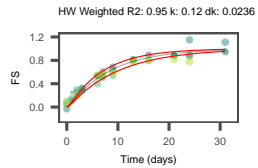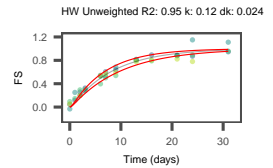

## PPID

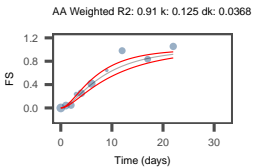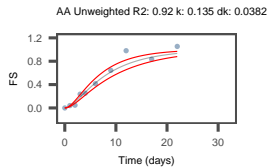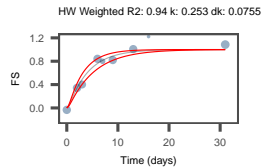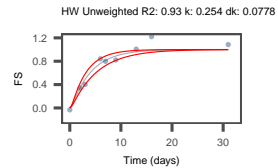

PRD16

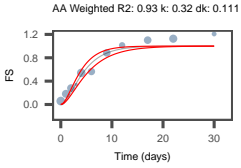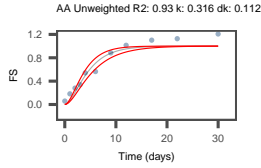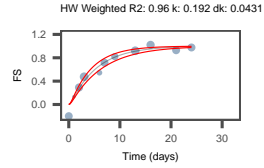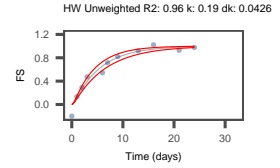

PRDX1

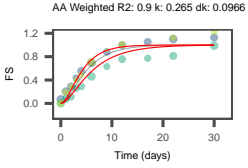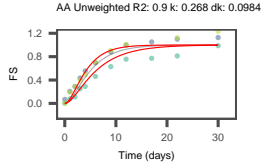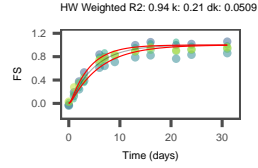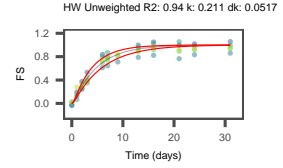

PRDX2

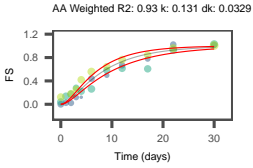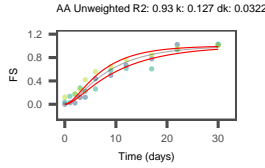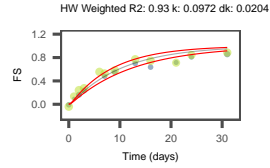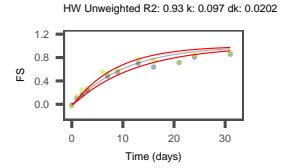

PRDX5

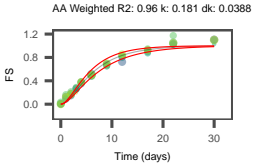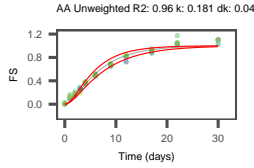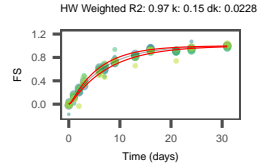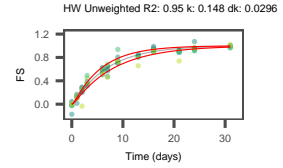

PRDX6

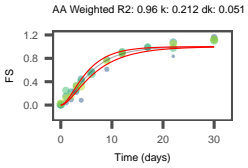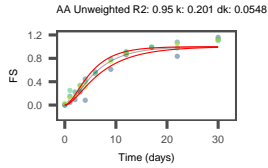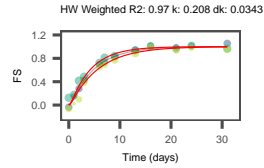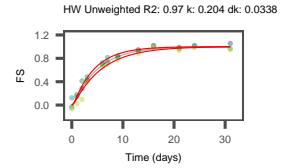

PROF1

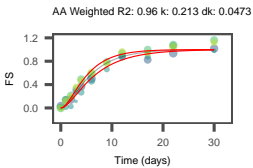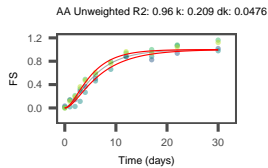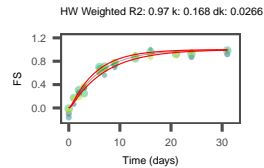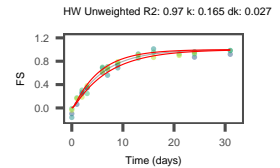



## PSA2

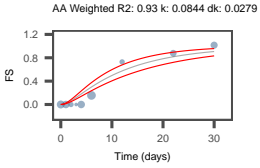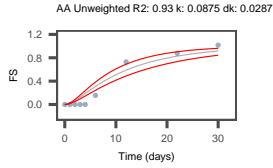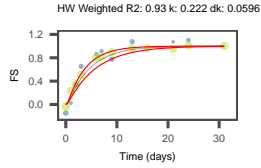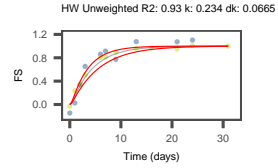

## PSB3

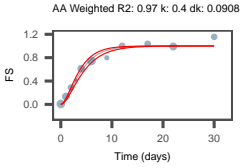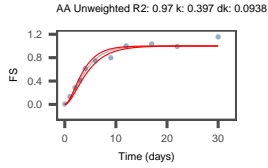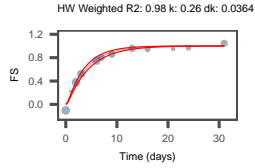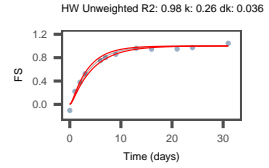

## PSB4

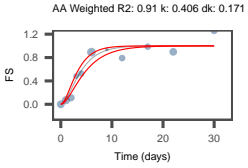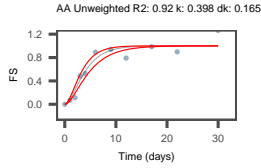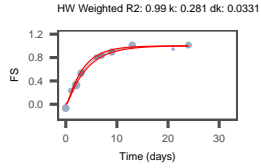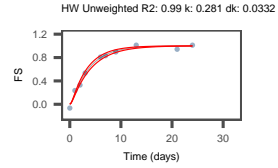

## PSB5

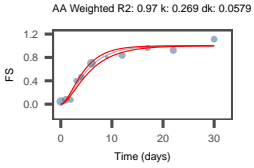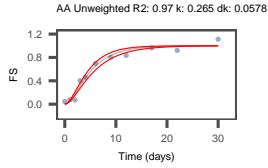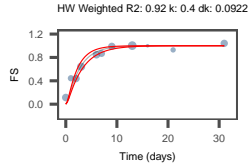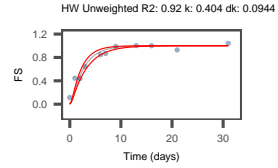

## PSMD1

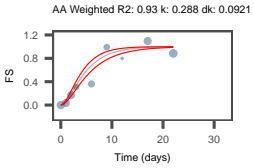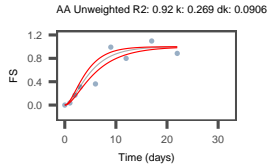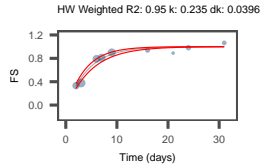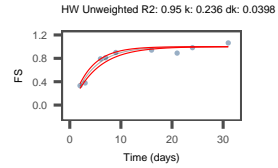

## PTER

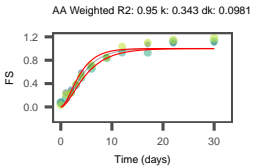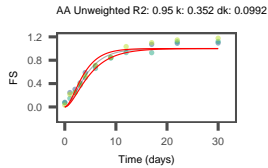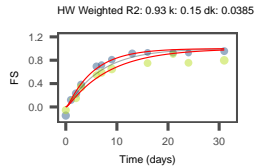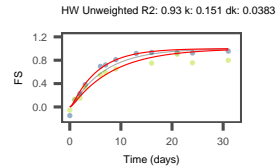

## PUR8

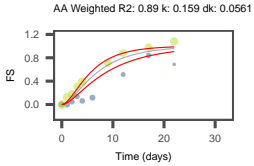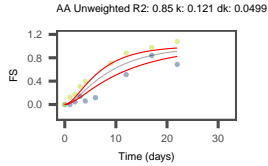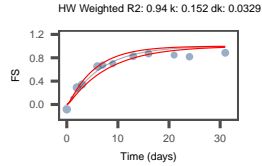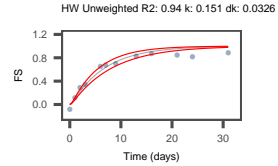

## PXL2A

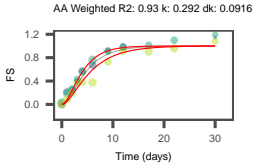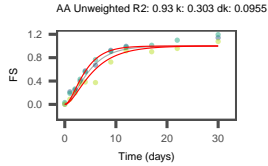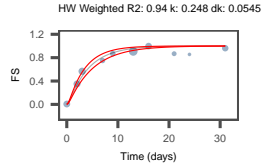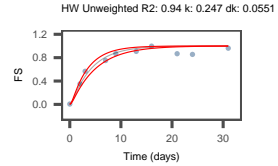

## PXMP2

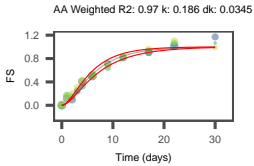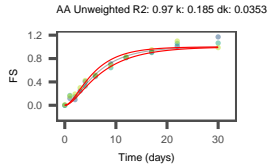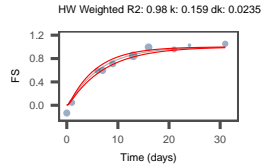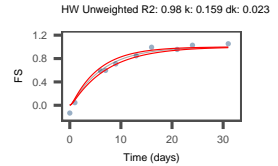

## PYC

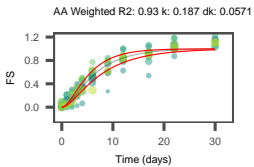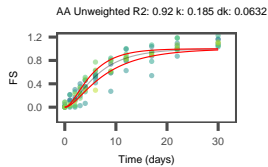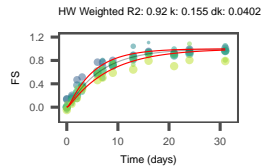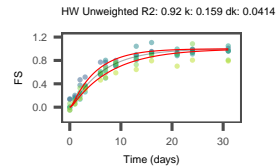

## PZP

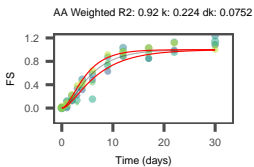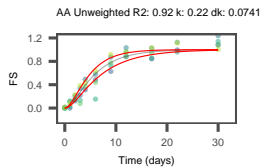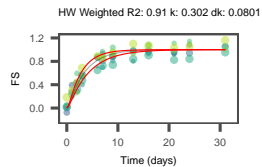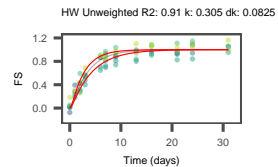

## QCR1

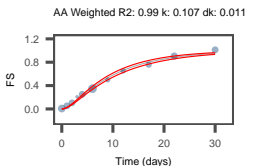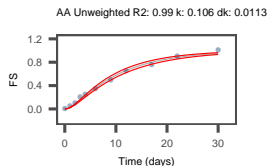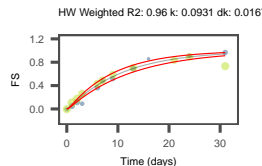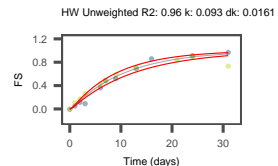

## QCR2

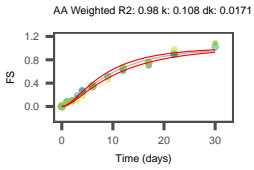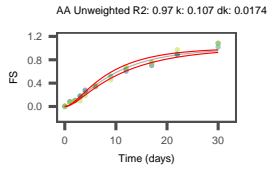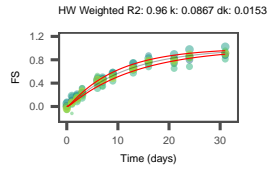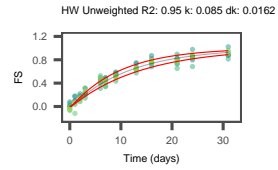

## QCR7

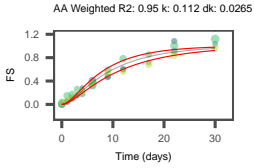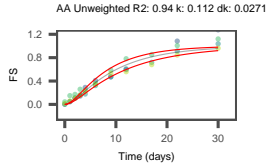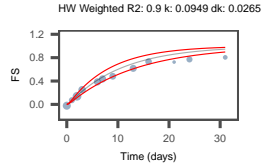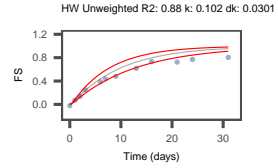

## QCR8

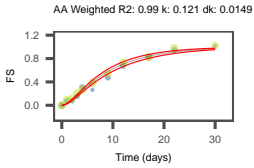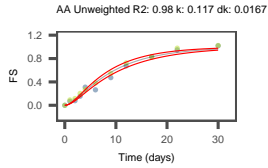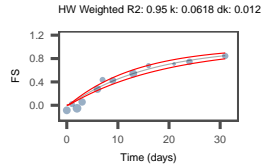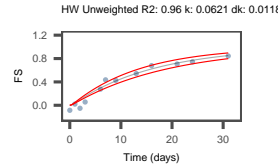

## QOR

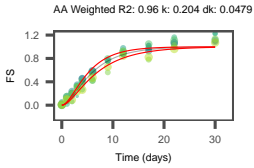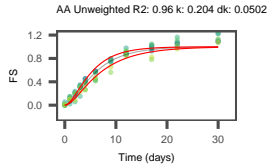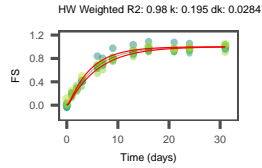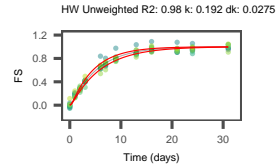

## QORL2

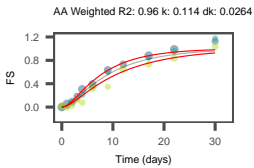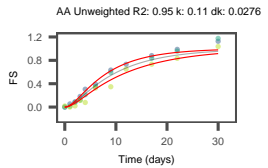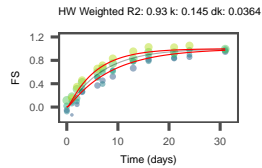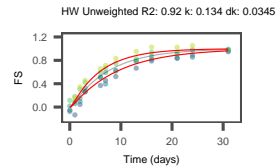

## RAB18

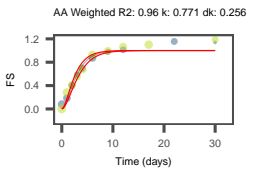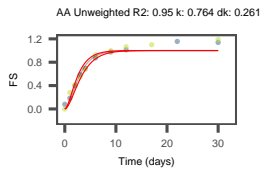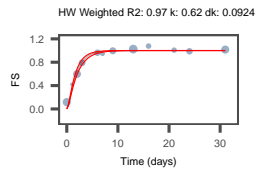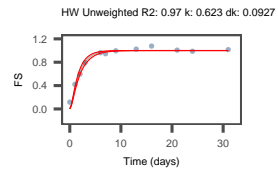

## RAB1A

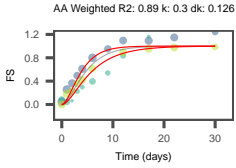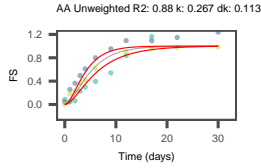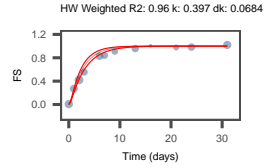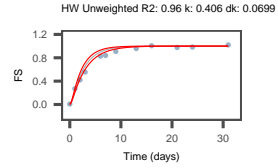

## RAB1B

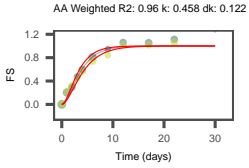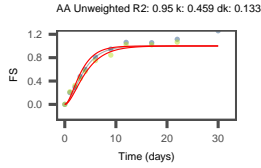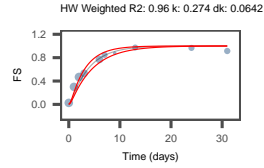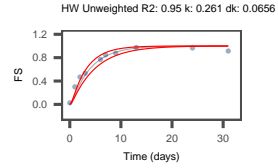

## RAB5C

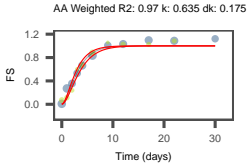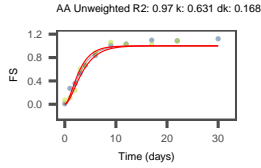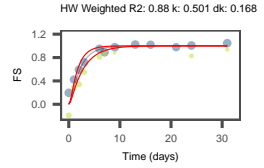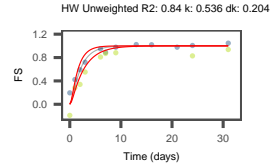

## RACK1

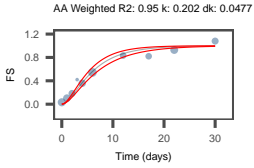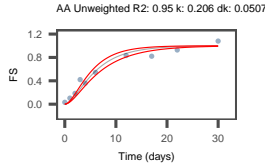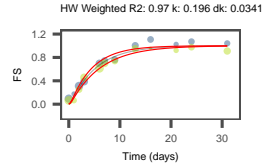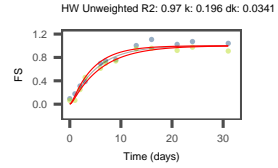

## RADI

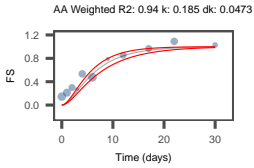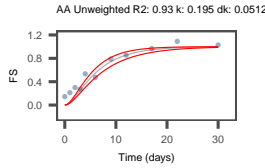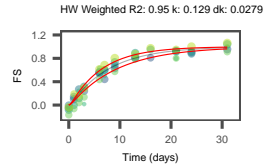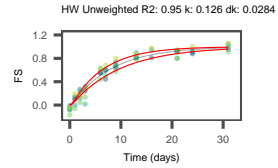

## RALA

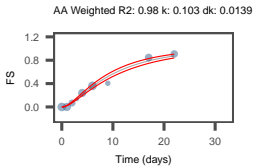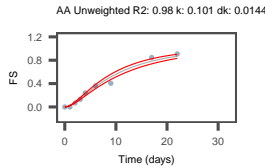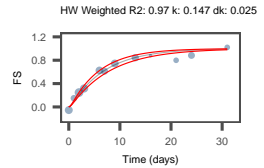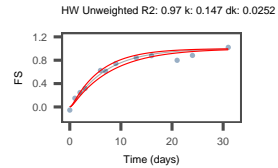

## REEP5

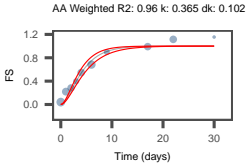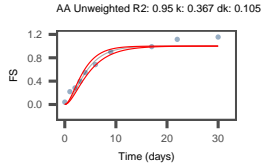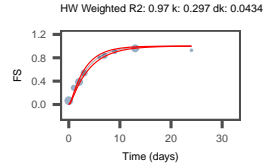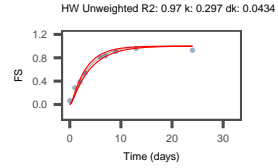

## RENT1

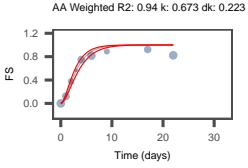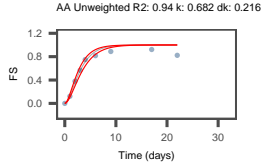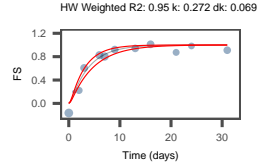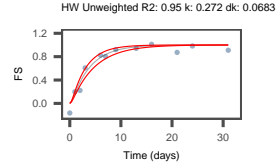

## RETST

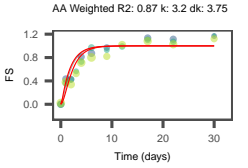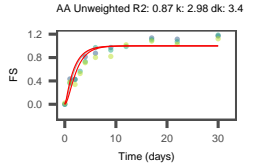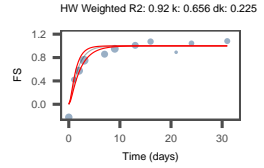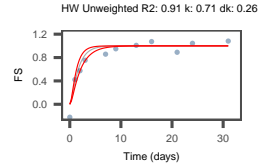

## RHOA

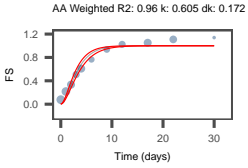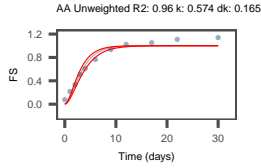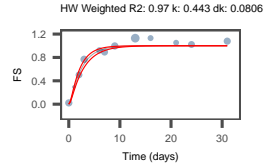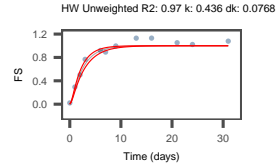

## RIDA

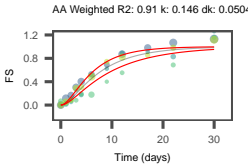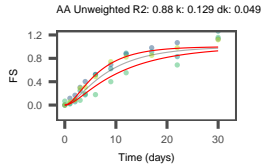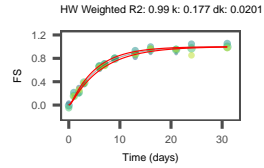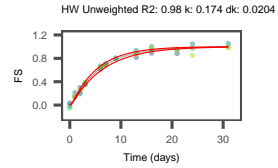

## RL11

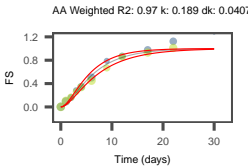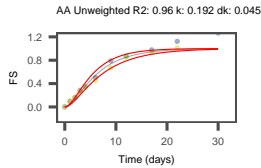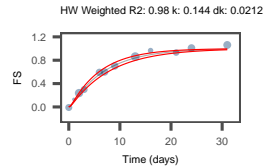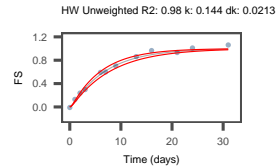

RL12

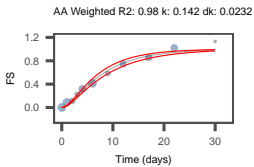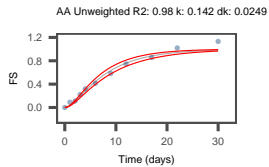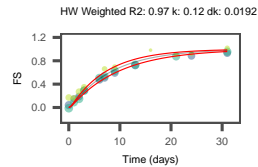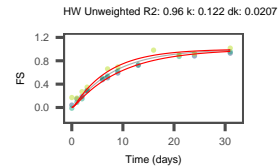

RL13A

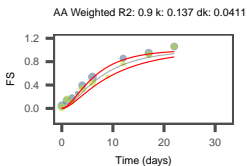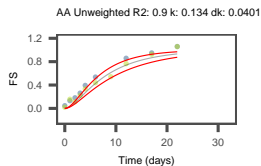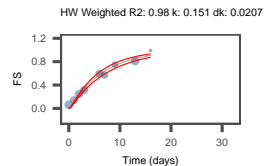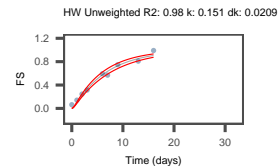

RL15

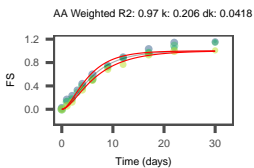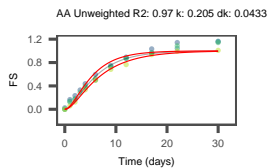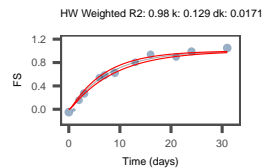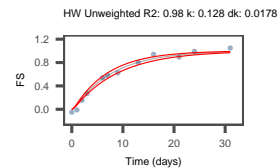

RL17

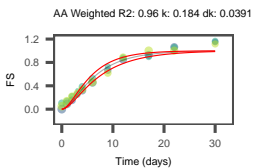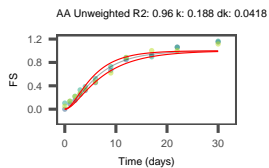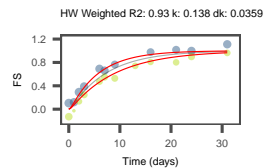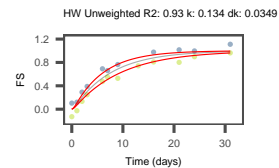

RL18

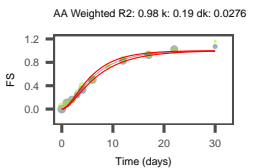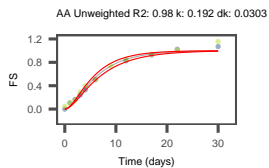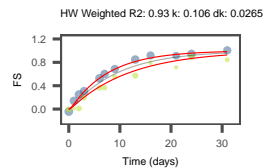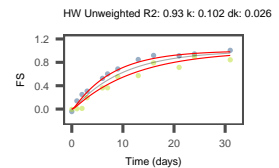

RL23

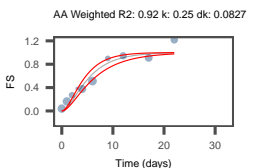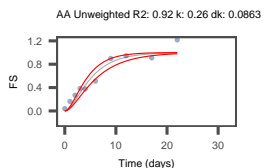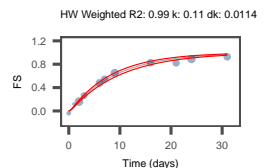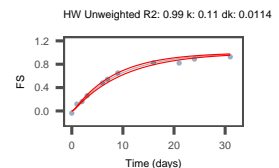

RL26

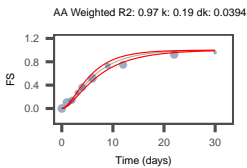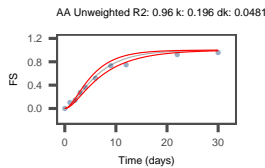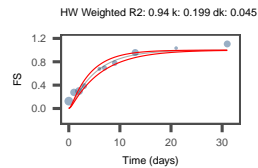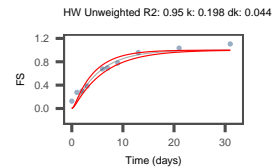

RL27A

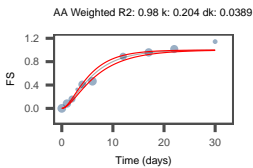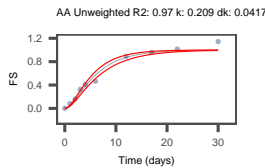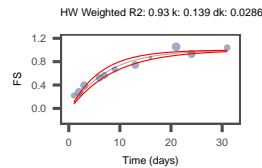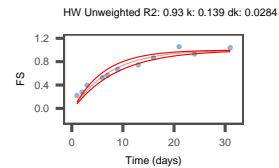

RL28

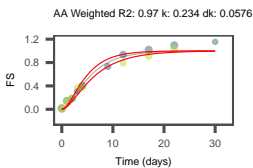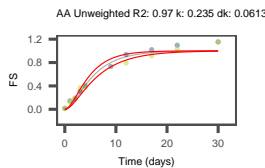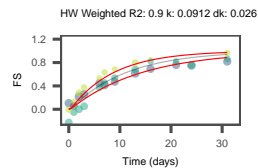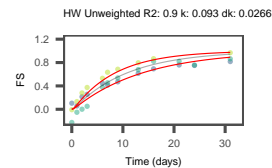

RL3

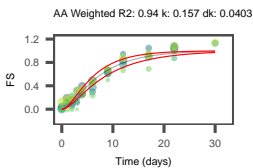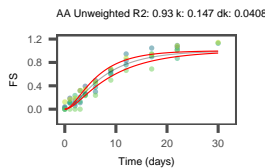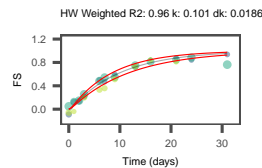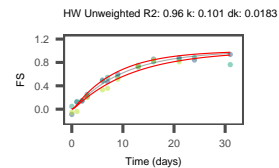

RL31

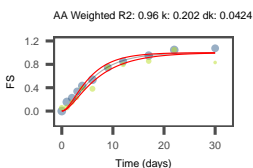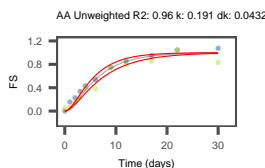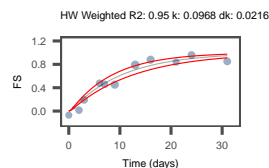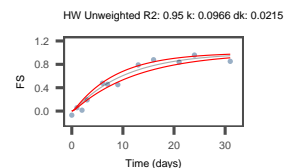

RL38

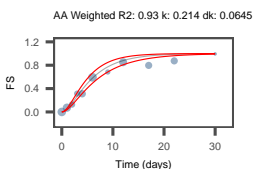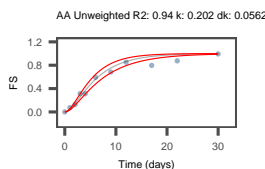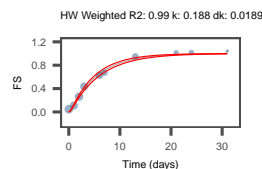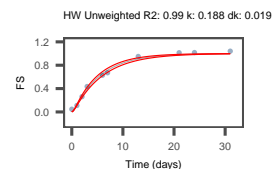

RL4

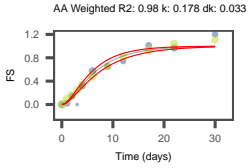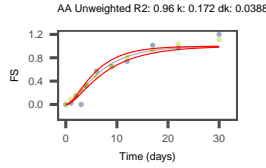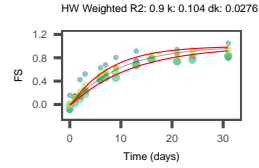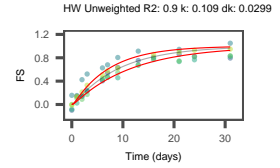

RL5

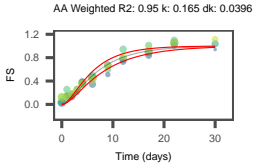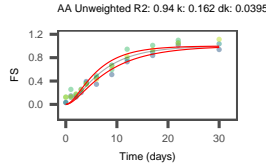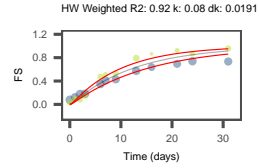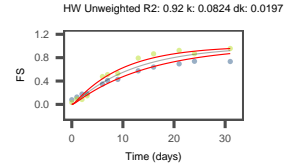

RL6

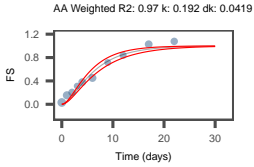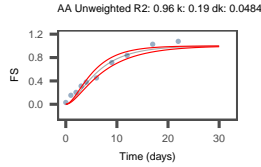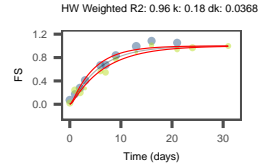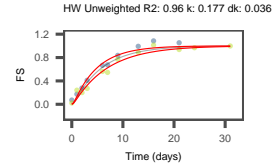

RL7

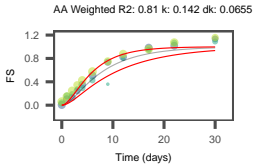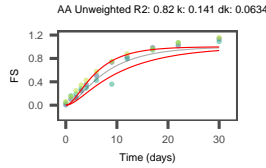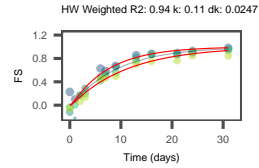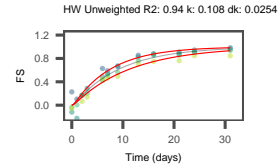

RL7A

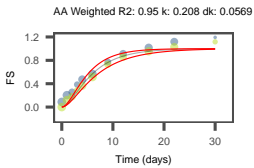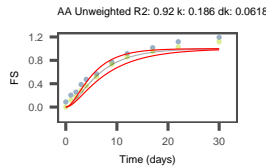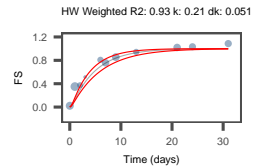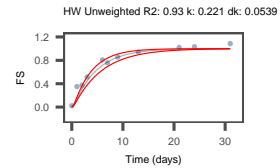

RL9

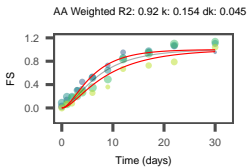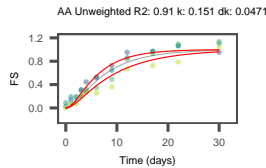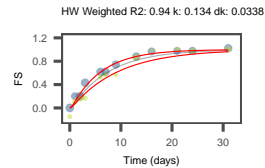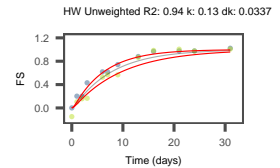



## RLA0

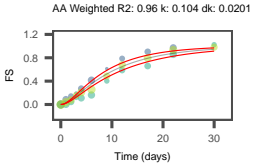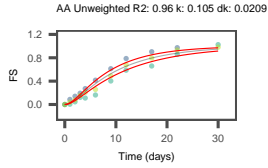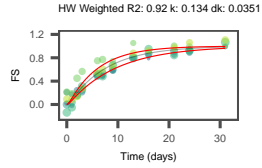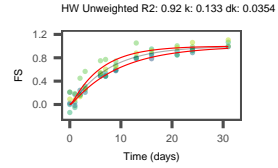

## RLA1

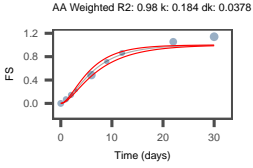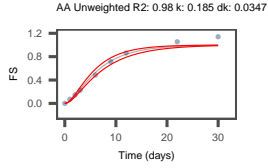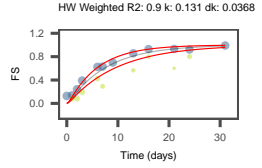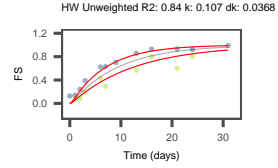

## ROA1

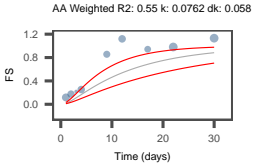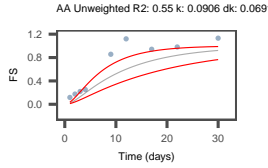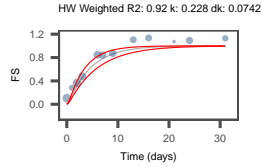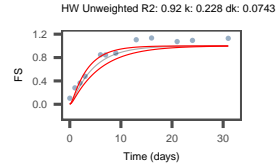

## ROA2

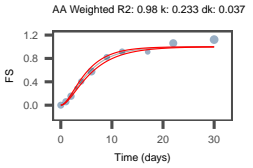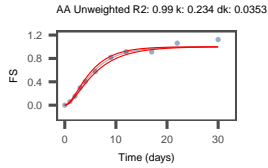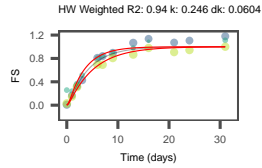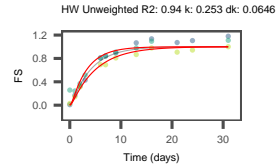

## ROA3

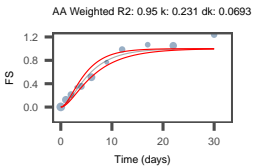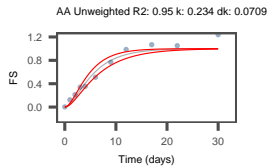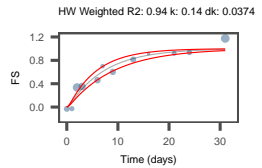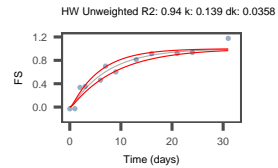

## RPN1

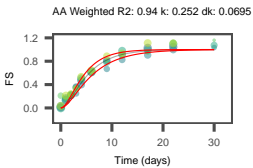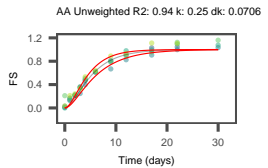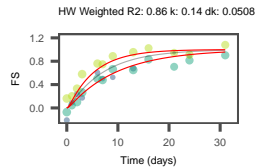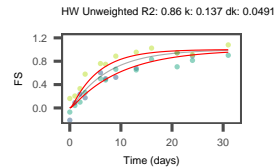

RPN2

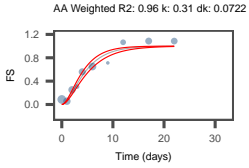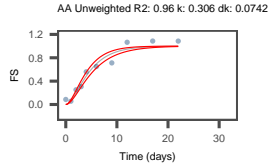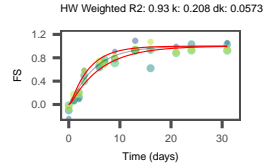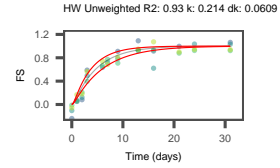

RS10

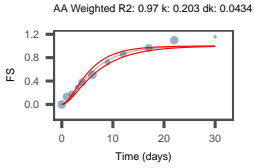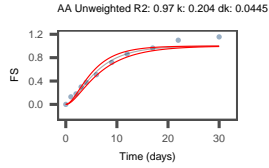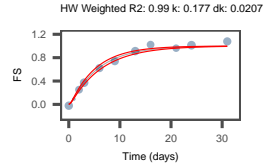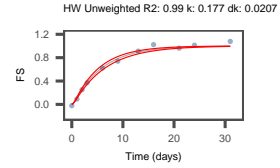

RS11

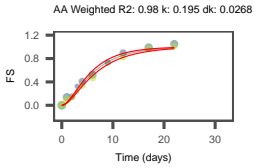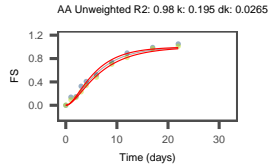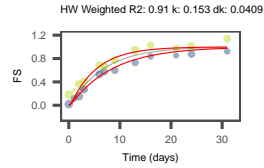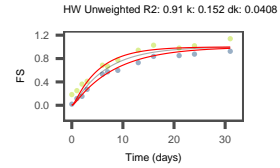

RS15A

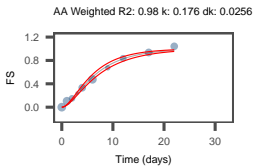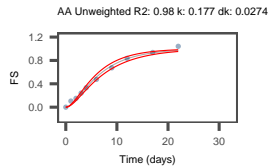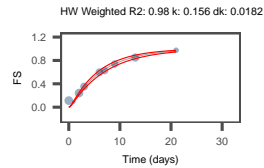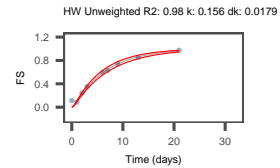

RS16

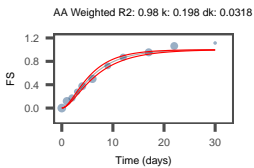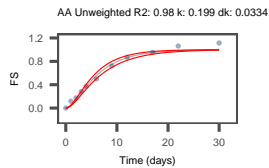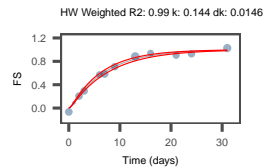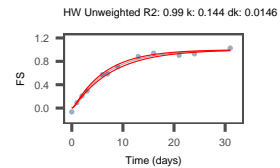

RS17

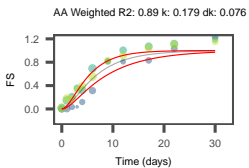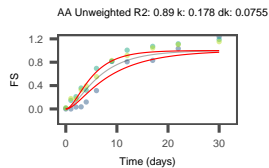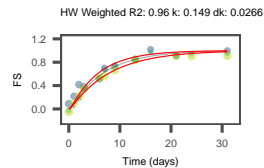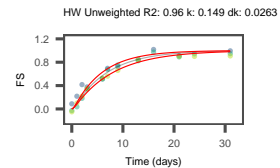

RS19

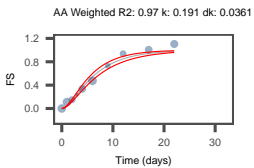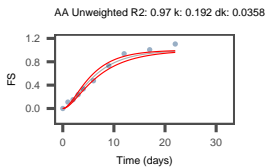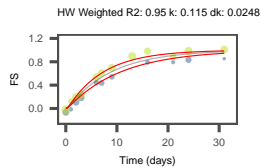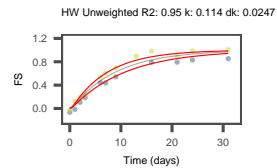

RS2

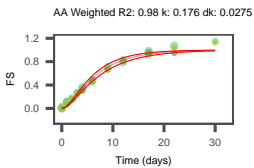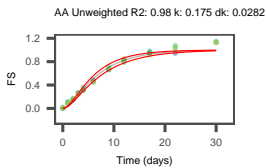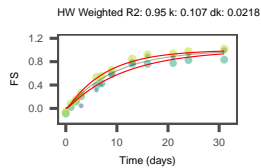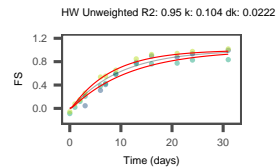

RS23

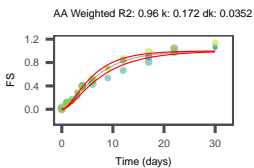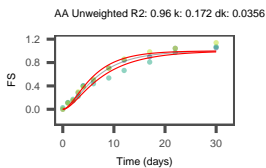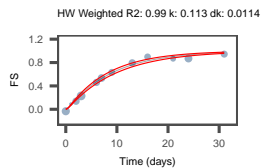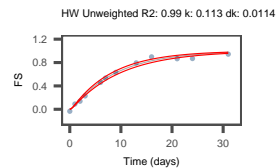

RS24

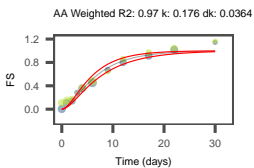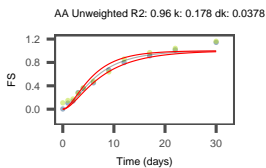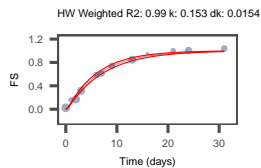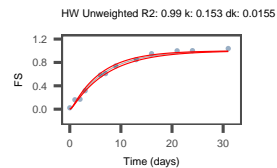

RS25

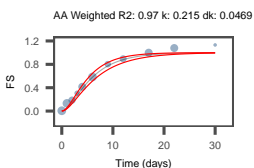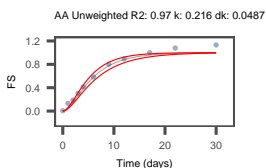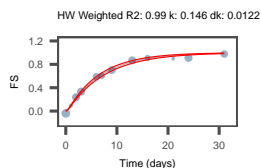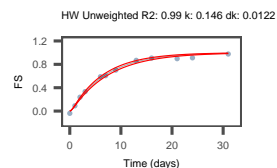

RS3

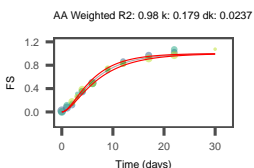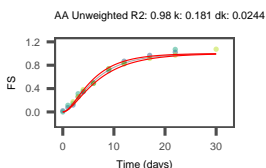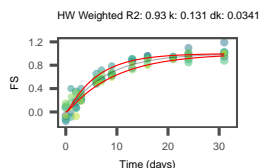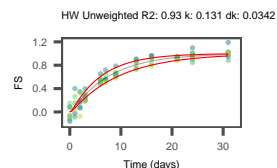

## RS4X

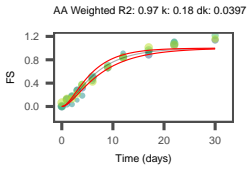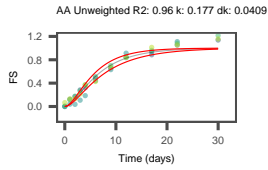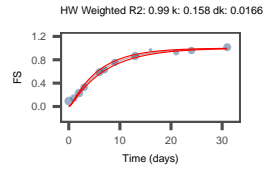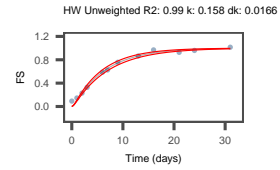

## RS7

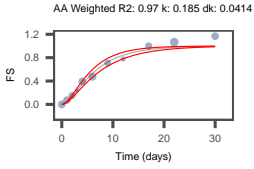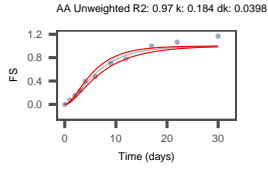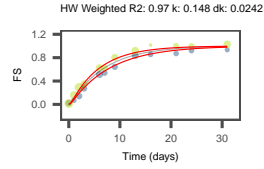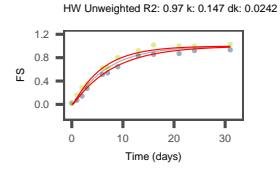

## RSSA

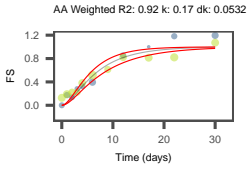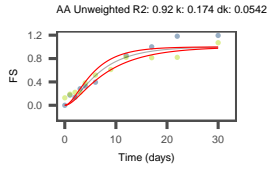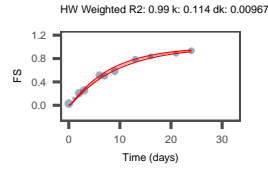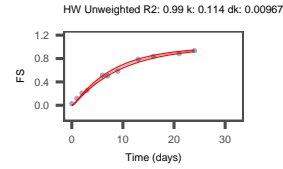

## RSU1

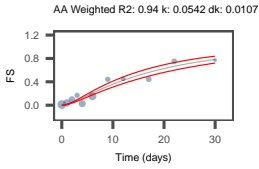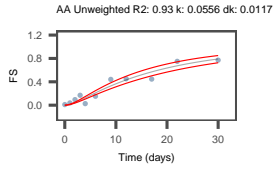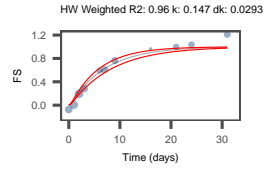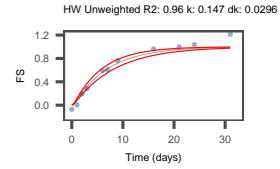

## RT36

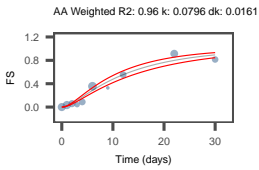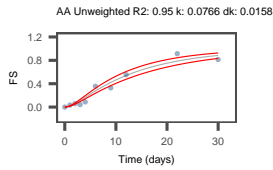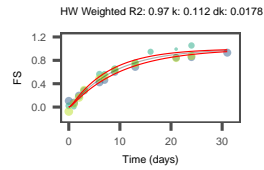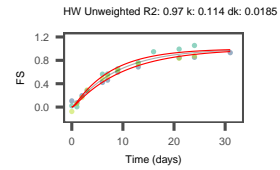

## RT4H

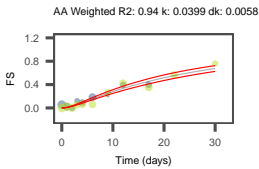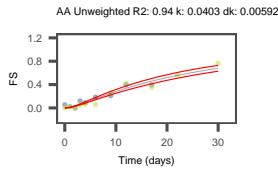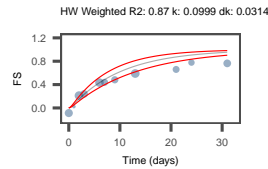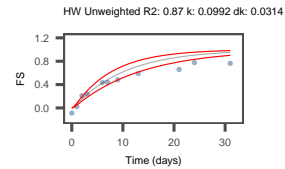

S100G

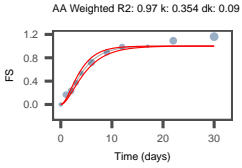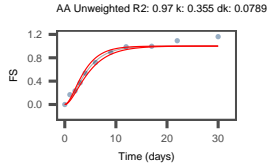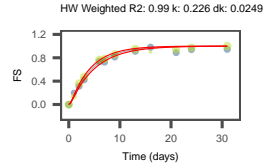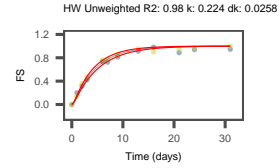

S10A1

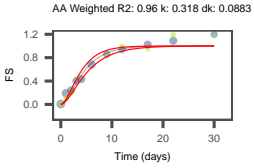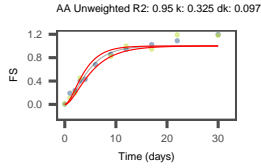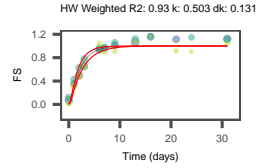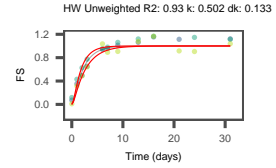

S22A6

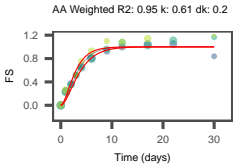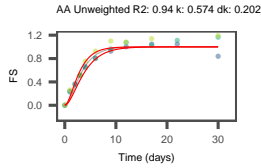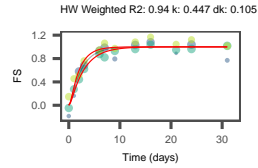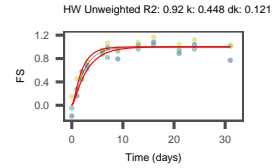

S22AC

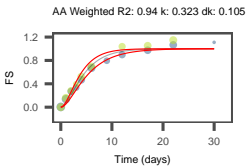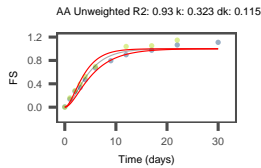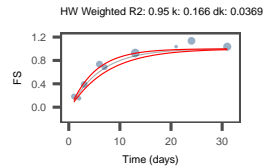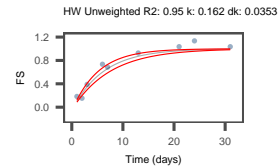

S22AI

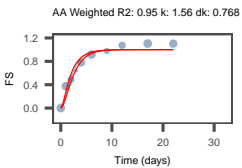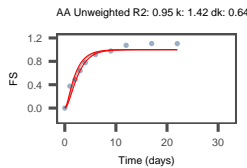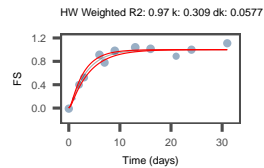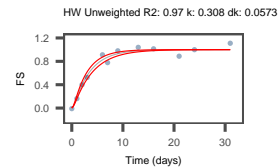

S23A1

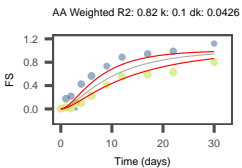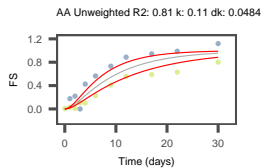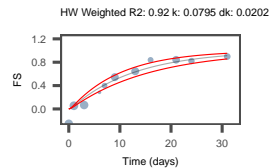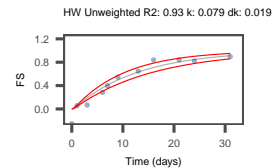

S27A2

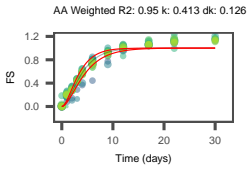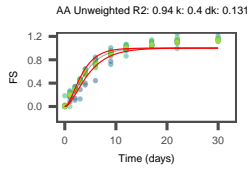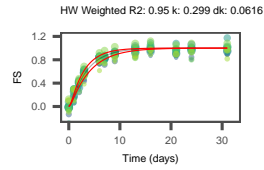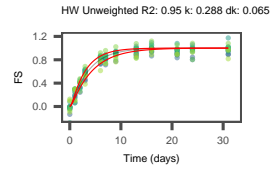

S4A4

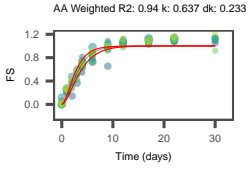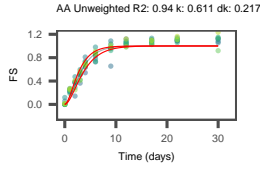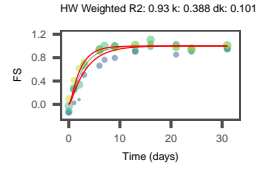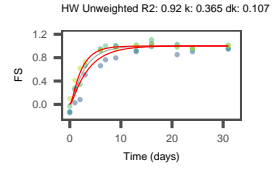

SAHH

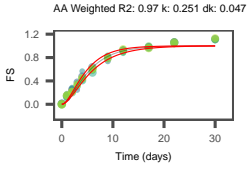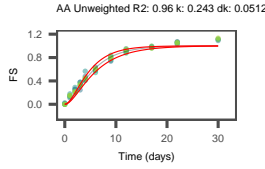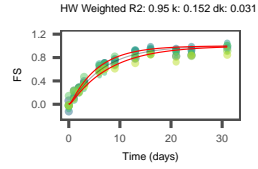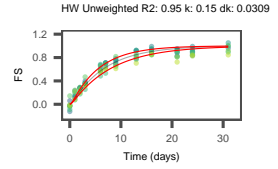

SARDH

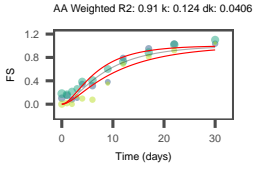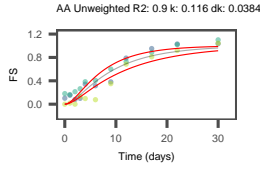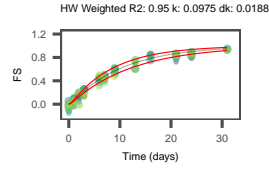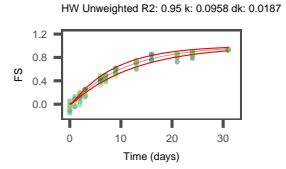

SBP1

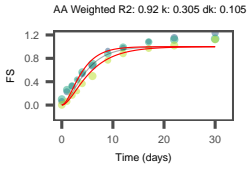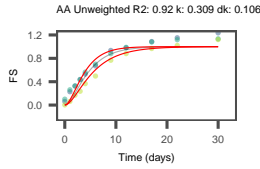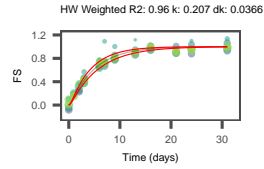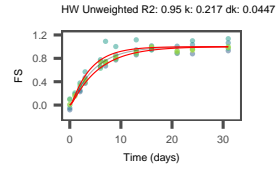

SC31A

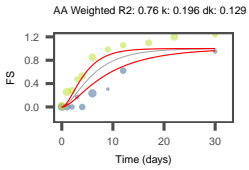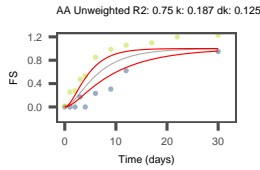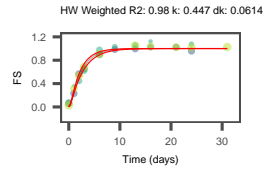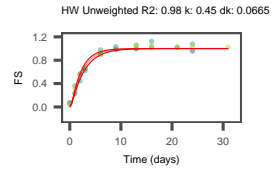

## SC5AA

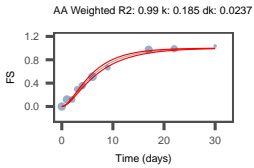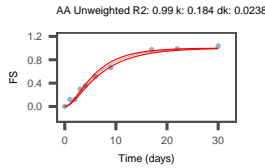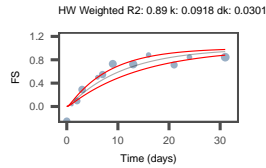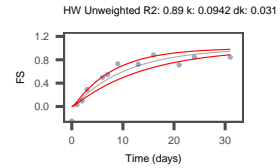

## SC5AC

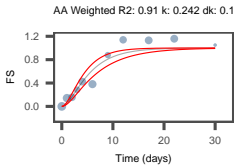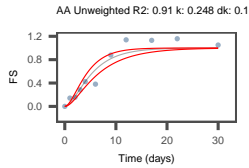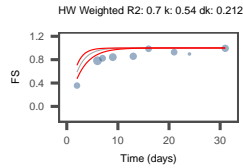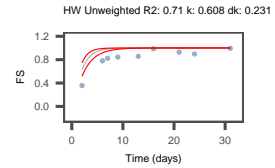

## SCOT1

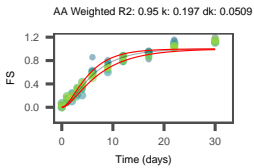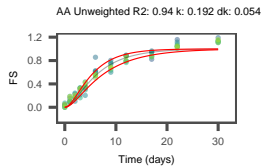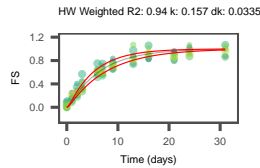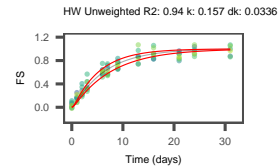

## SCP2

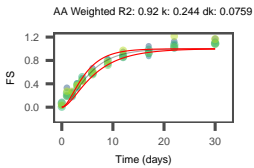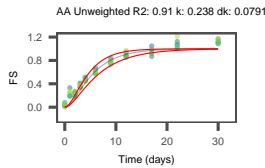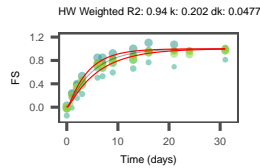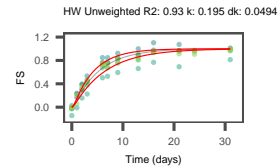

## SDHA

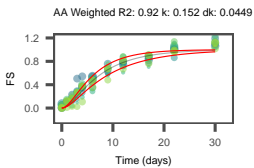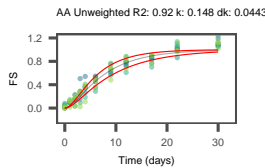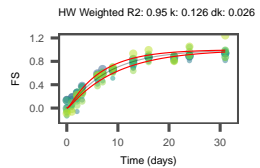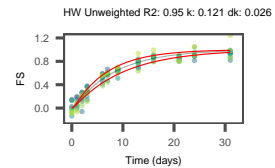

## SDHB

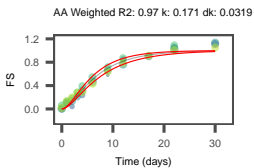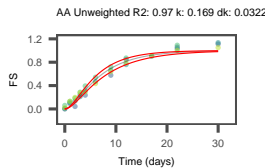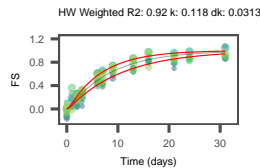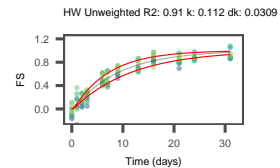

## SFXN1

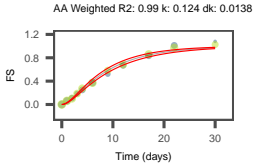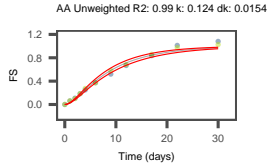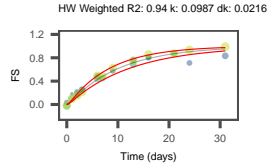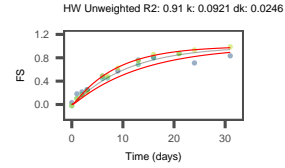

## SLC31

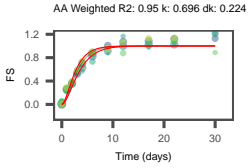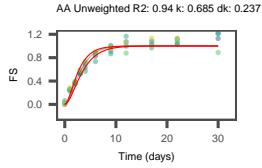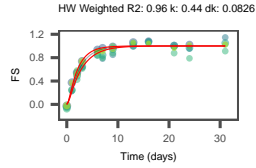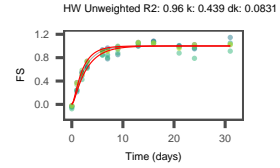

## SMD3

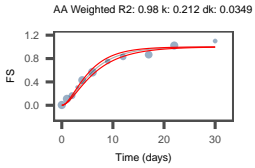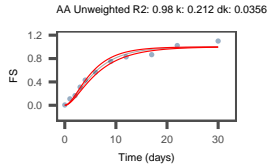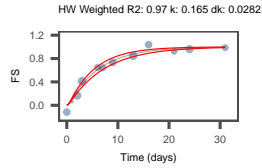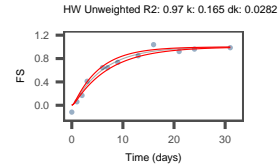

## SND1

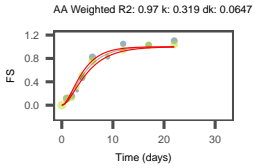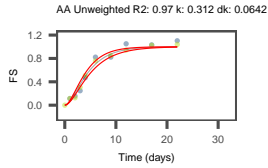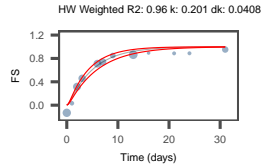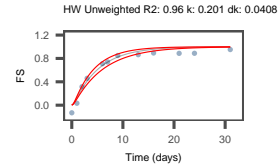

## SNX2

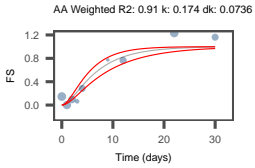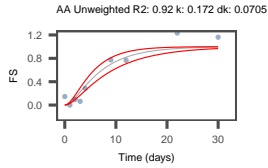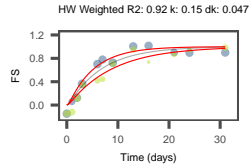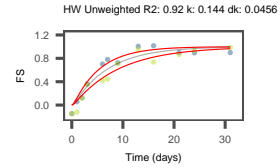

## SODC

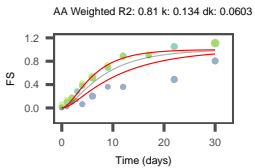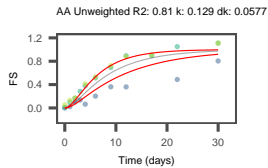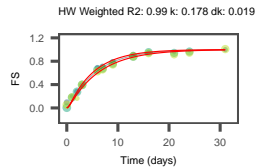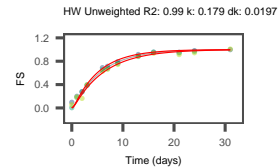



## SODM

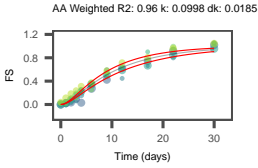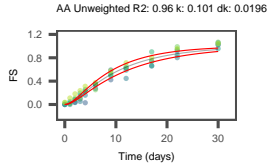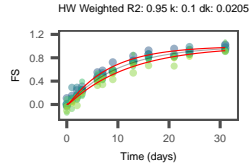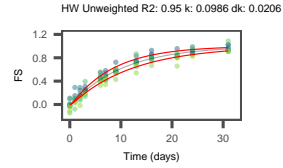

## SORCN

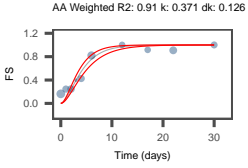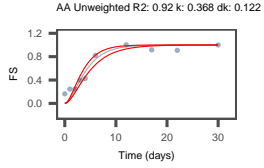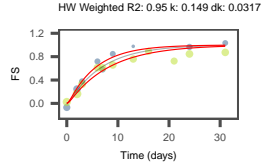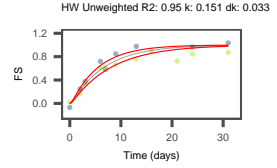

## SOX

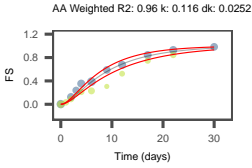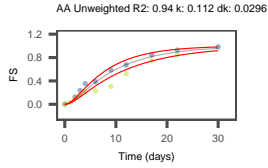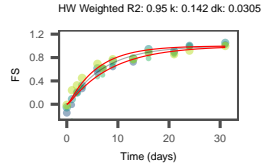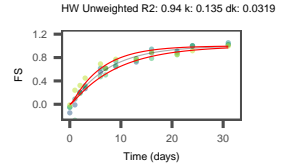

## SPTB2

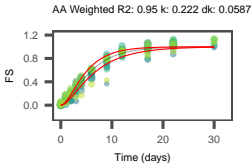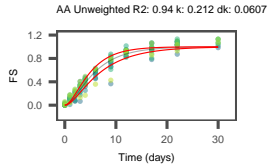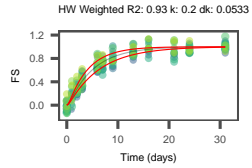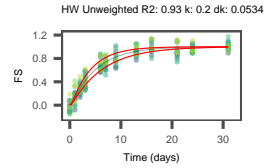

## SPTN1

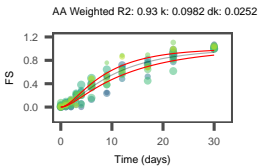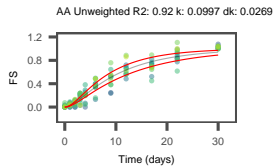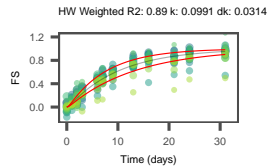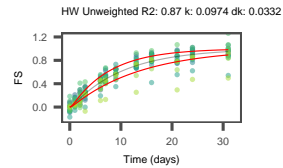

## SQOR

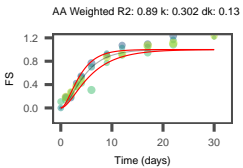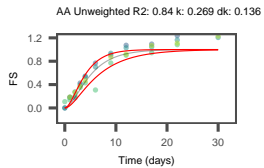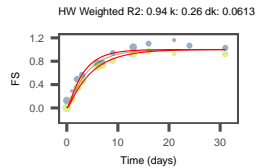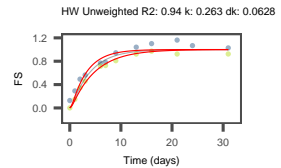

## SSDH

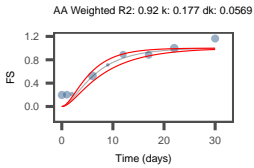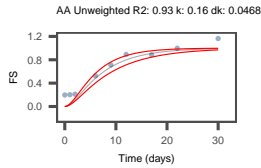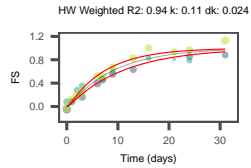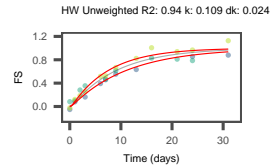

## ST1C2

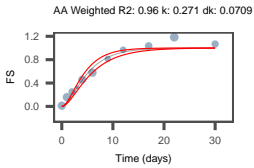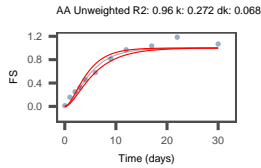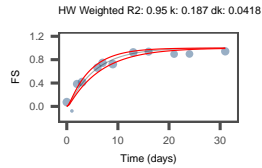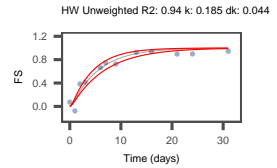

## ST1D1

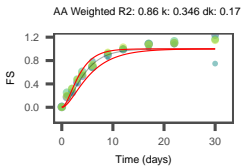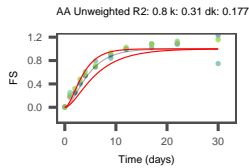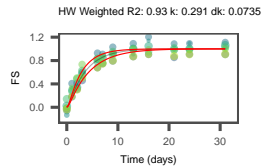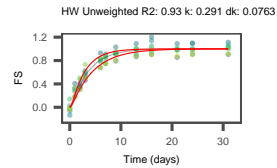

## STIP1

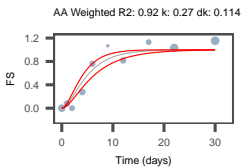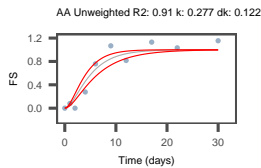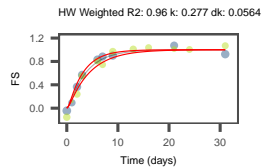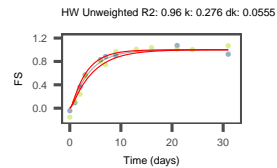

## SUCA

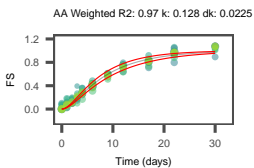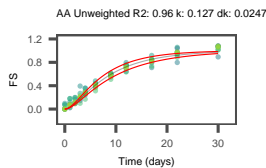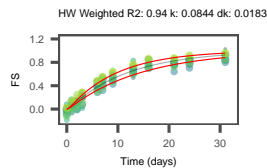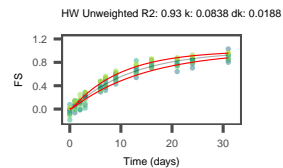

## SUCB1

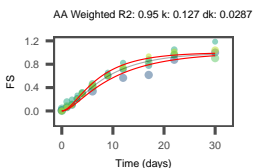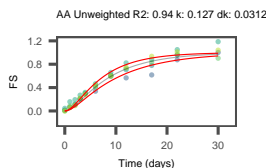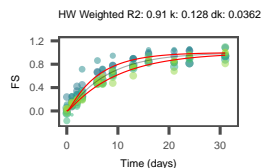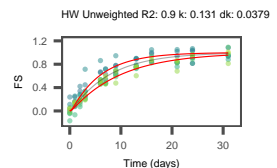

## SUCB2

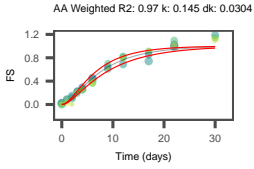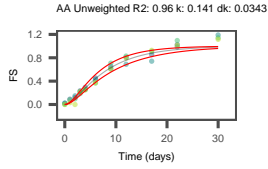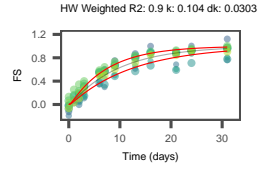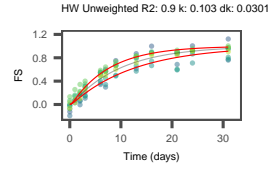

## SUCHY

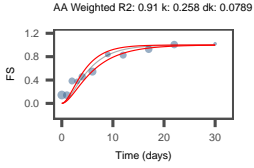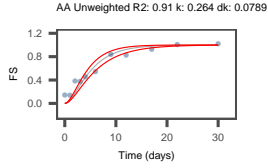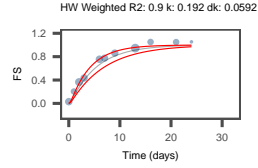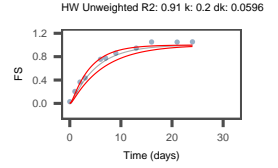

## SUSD2

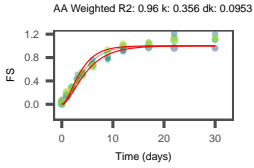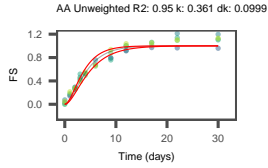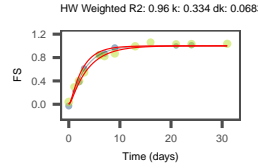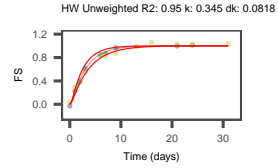

## SYDC

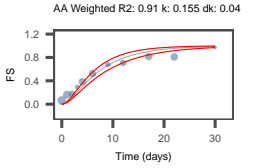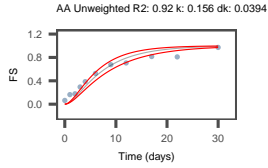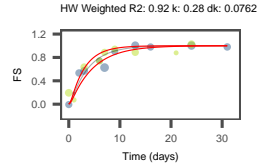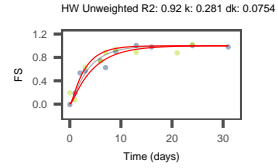

## SYEP

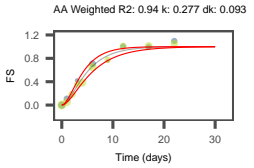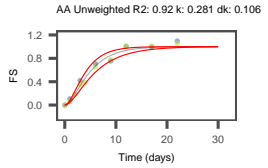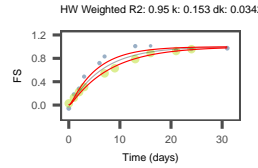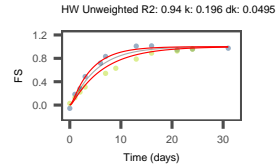

## SYFA

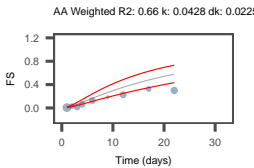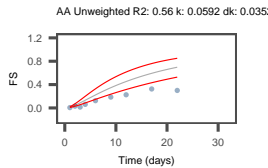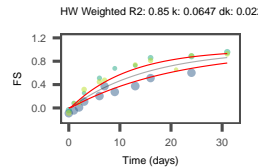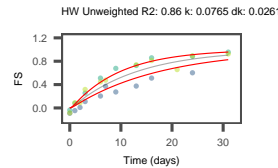

## SYIM

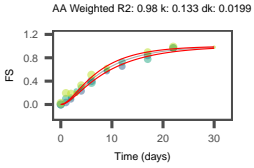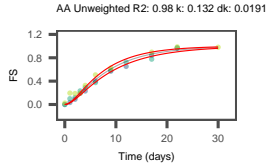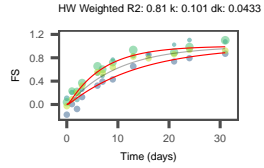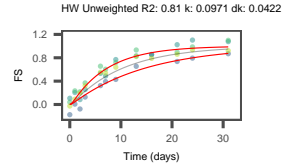

## TADBP

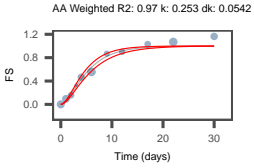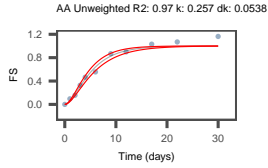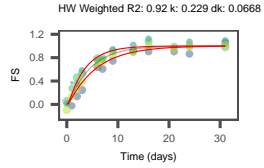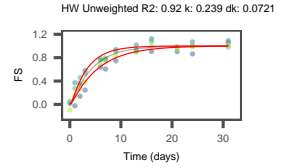

## TAGL2

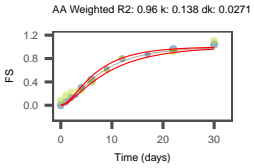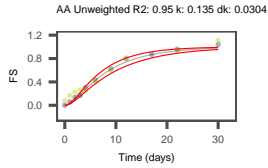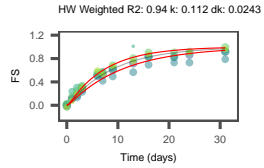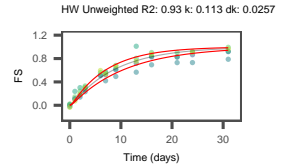

## TALDO

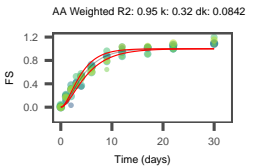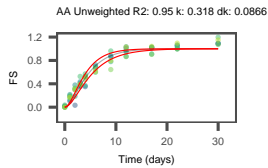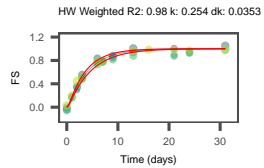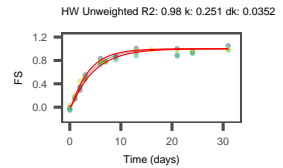

## TCPA

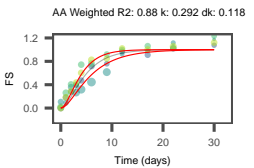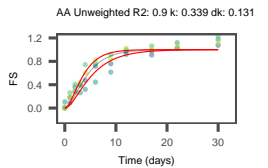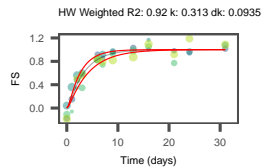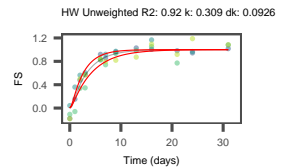

## TCPD

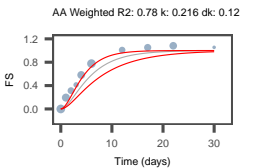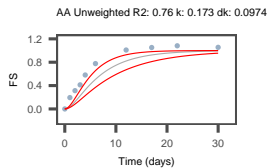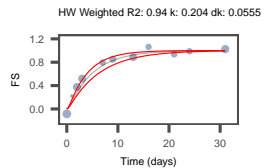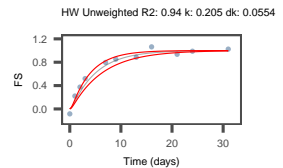

## TCPH

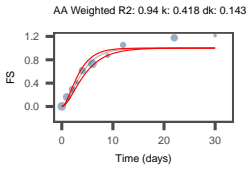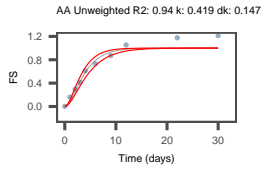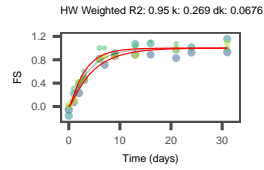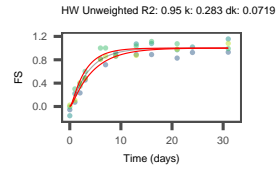

## TCPQ

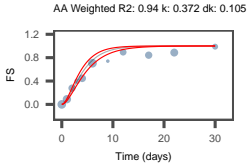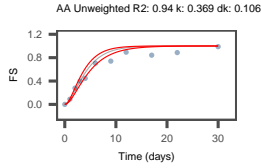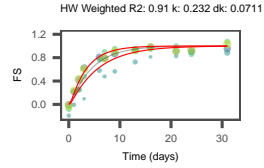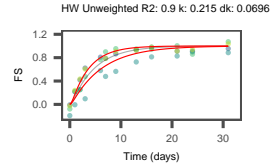

## TERA

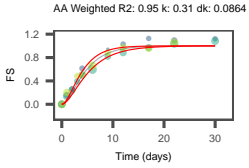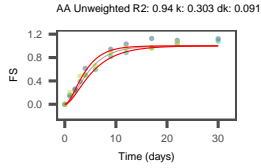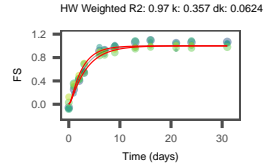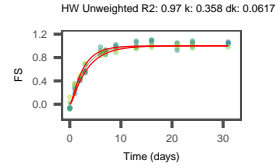

## TGM2

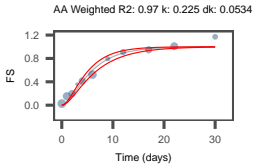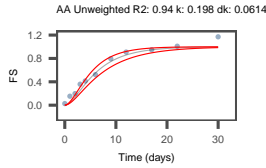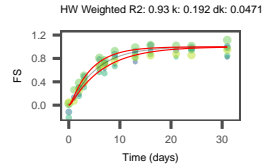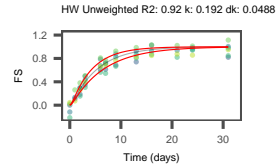

## THIKA

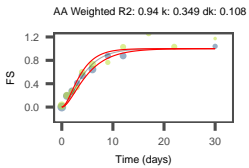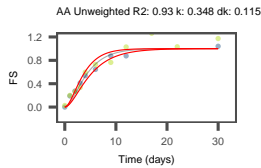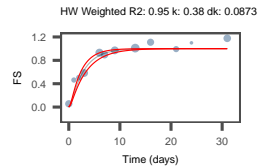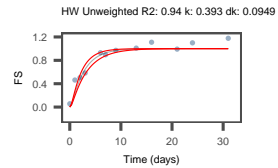

## THIL

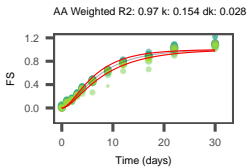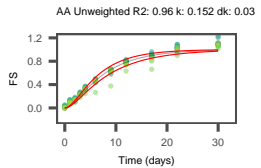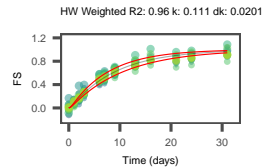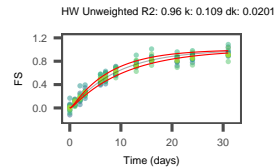

THIM

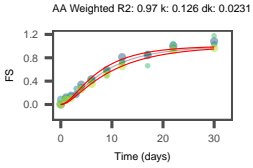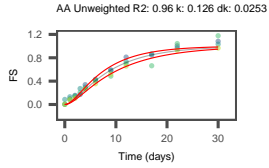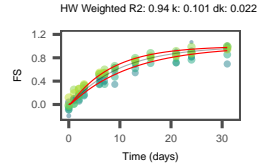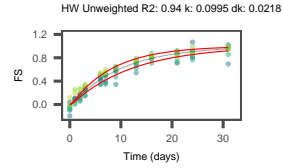

THNS2

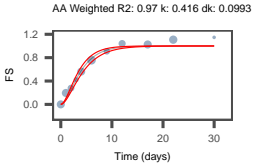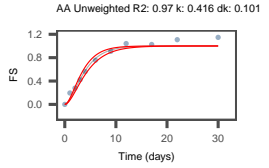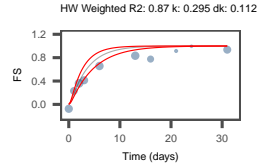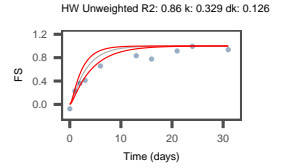

THTR

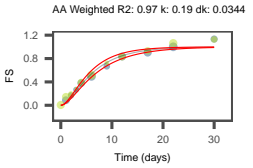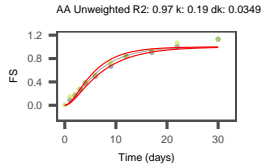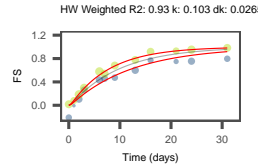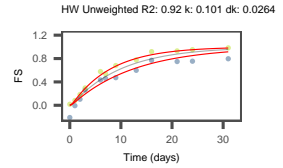

TIM50

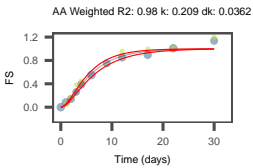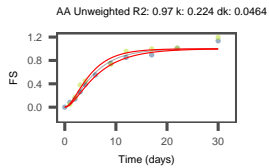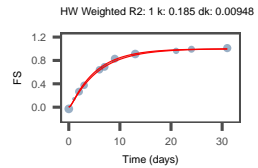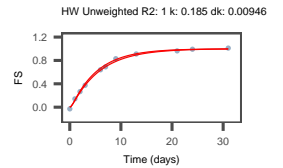

TKFC

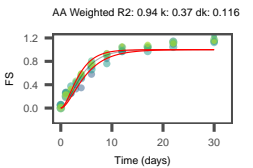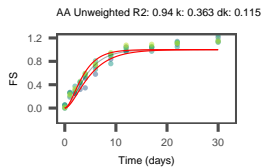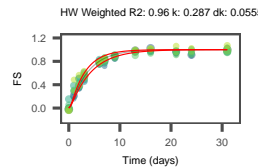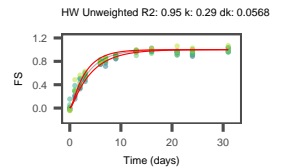

TKT

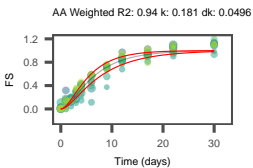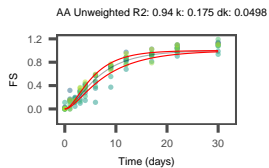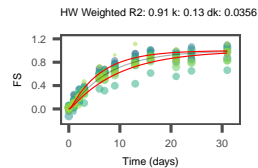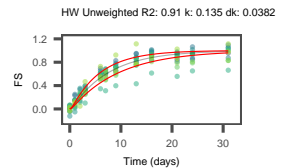

## TLN1

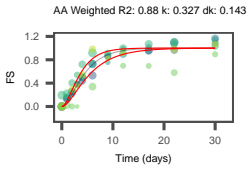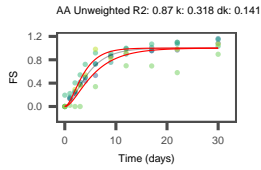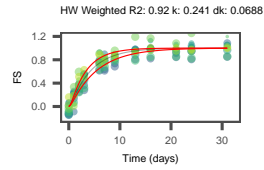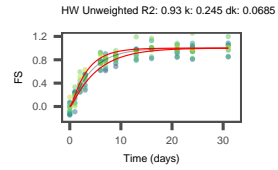

## TMEDA

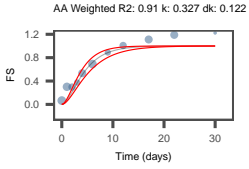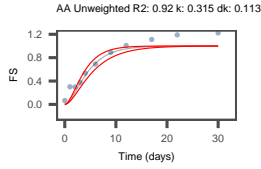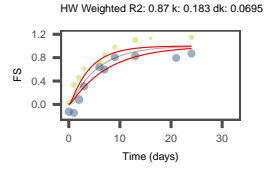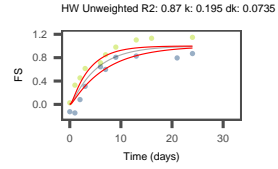

## TMM19

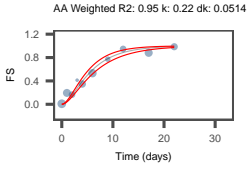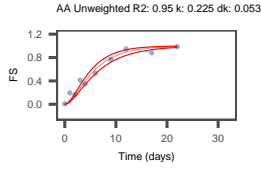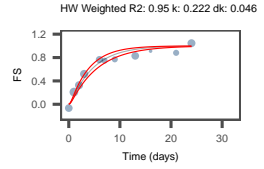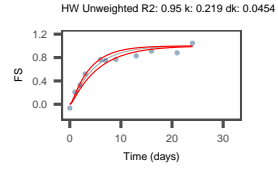

## TOM40

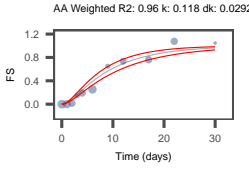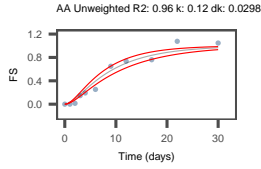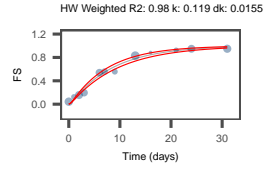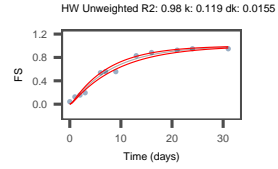

## TOM70

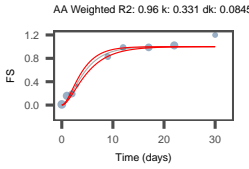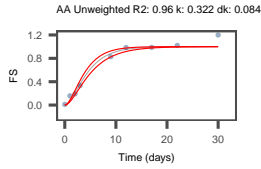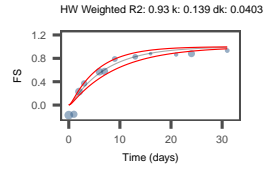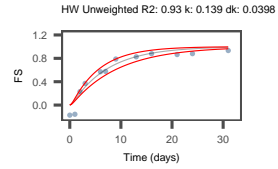

## TPIS

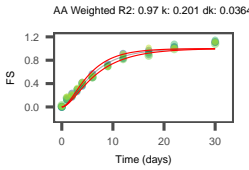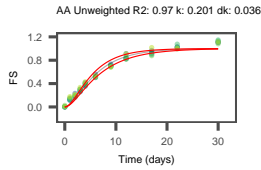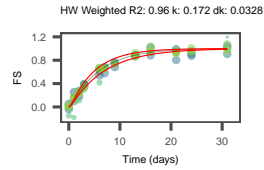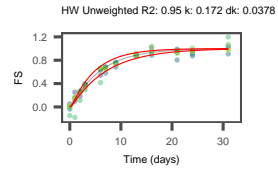

## TPMT

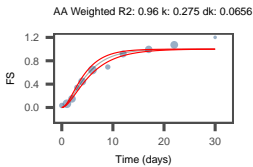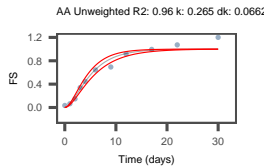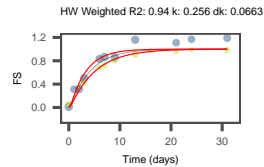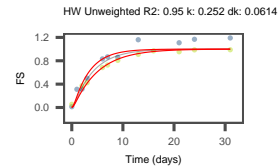

## TRAP1

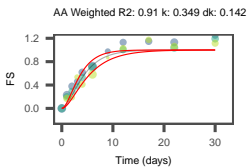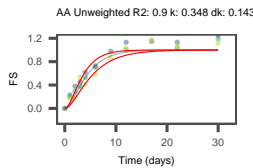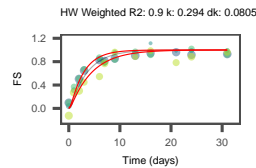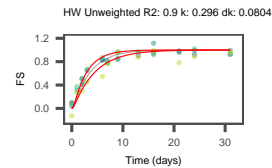

## TRFE

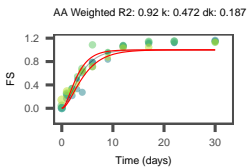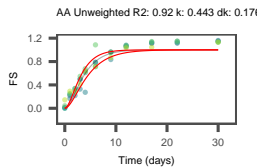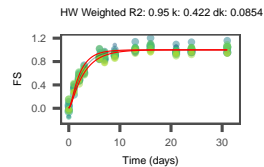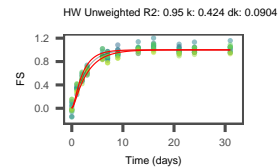

## TXTP

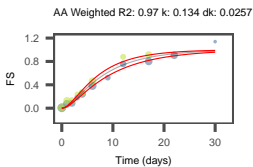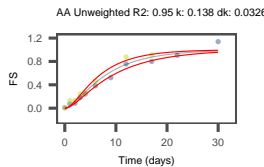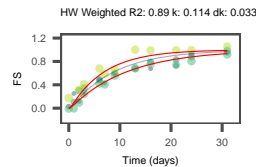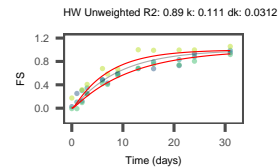

## UBA1

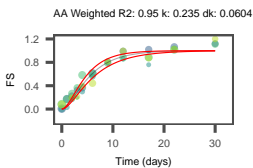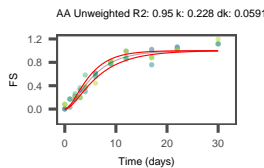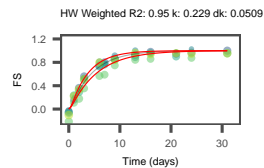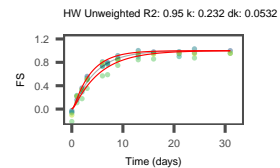

## UCRI

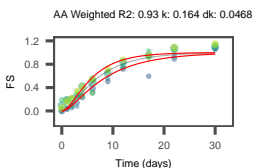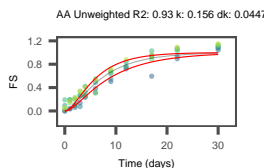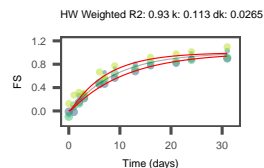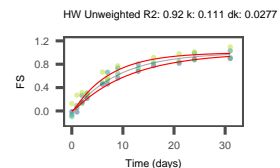



## UD17

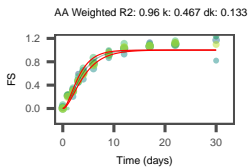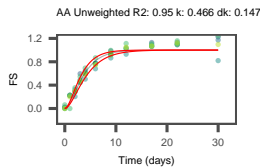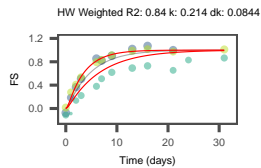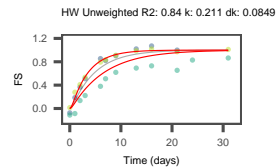

## UGDH

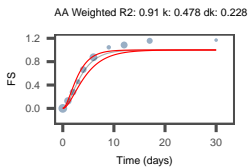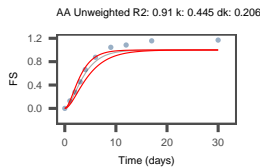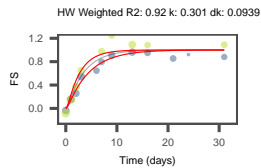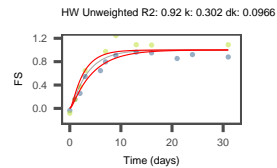

## UGPA

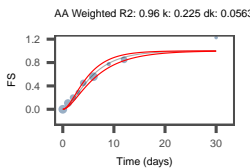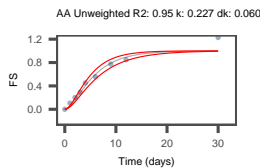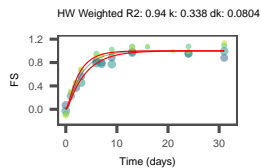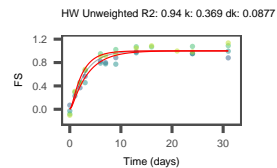

## VA0D1

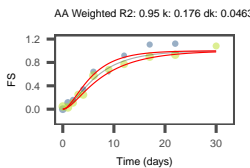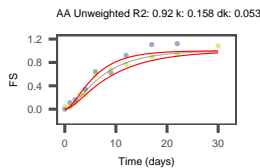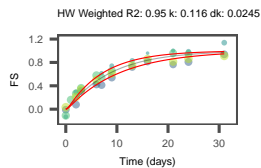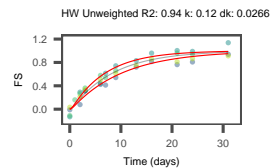

## VATA

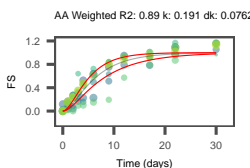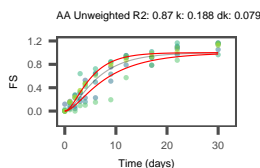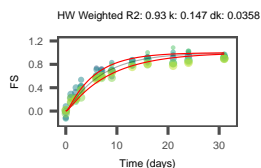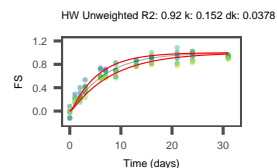

## VATB2

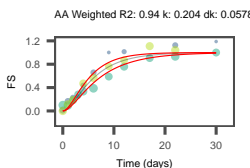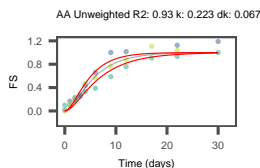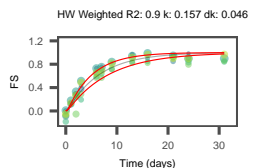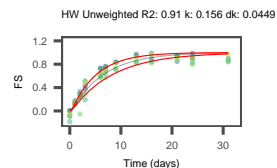

## VATC1

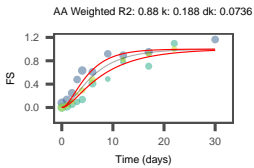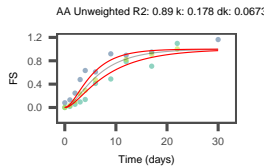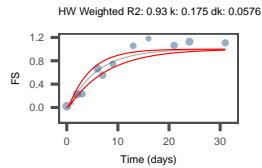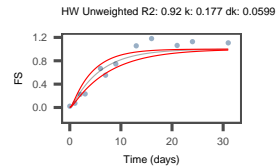

## VATD

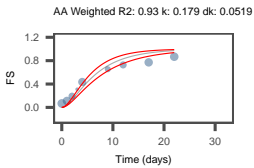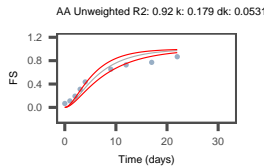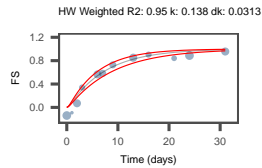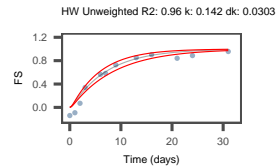

## VATE1

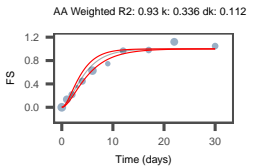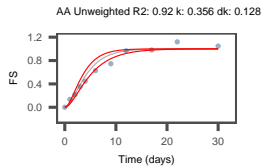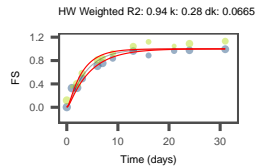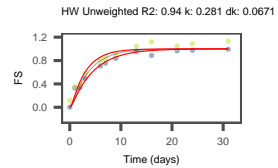

## VATH

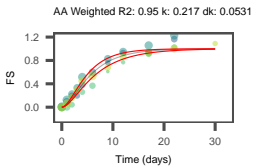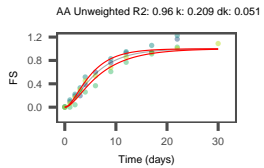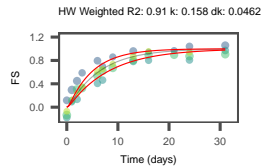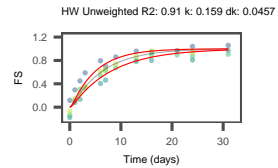

## VDAC1

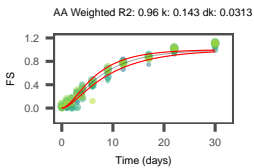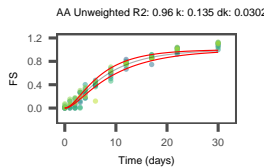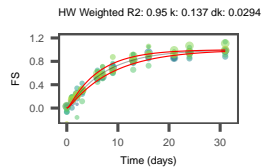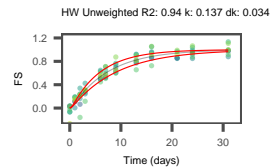

## VDAC2

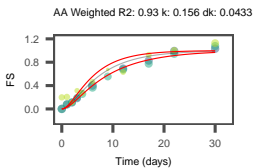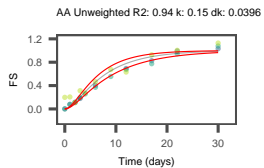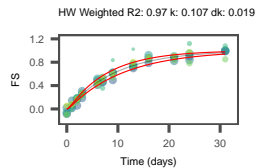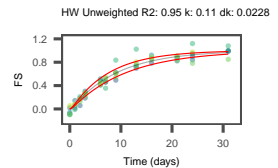

## VDAC3

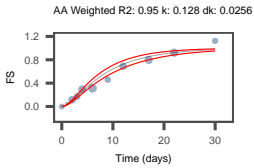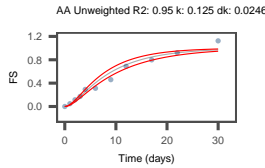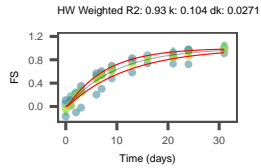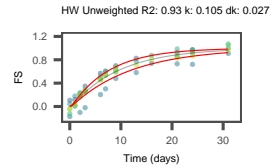

## VILI

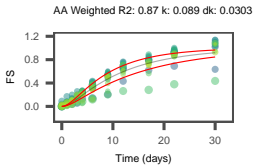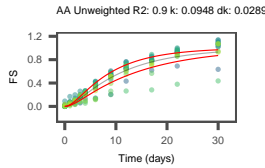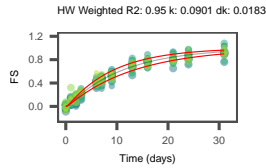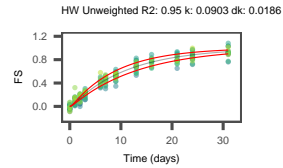

## VINC

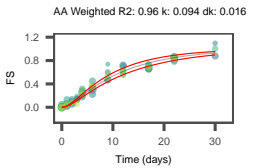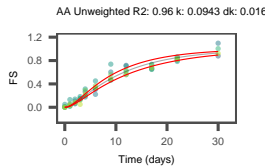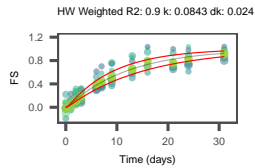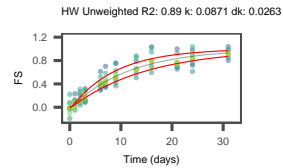

## VPP4

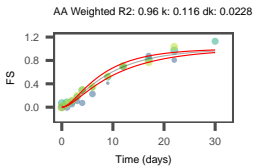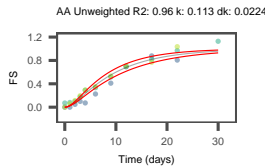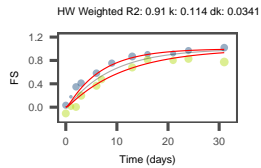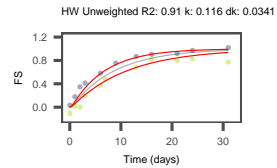

## VWA8

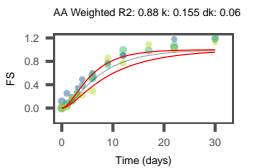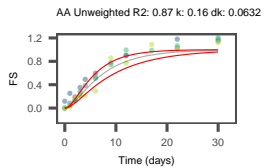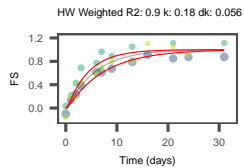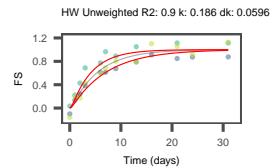

## XPO1

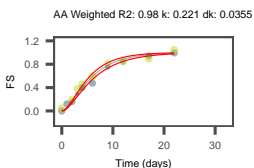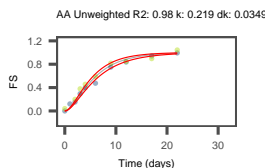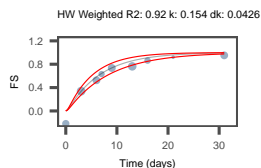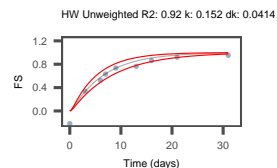

XYLB

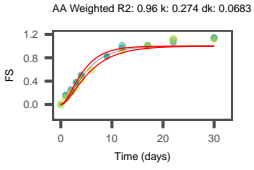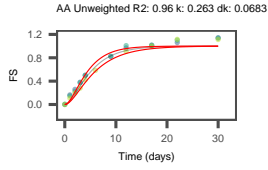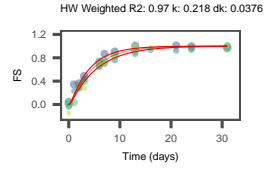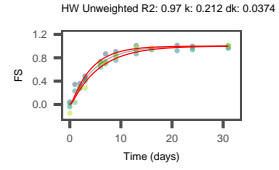

YBOX1

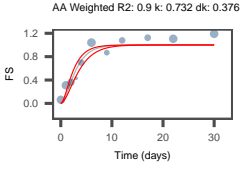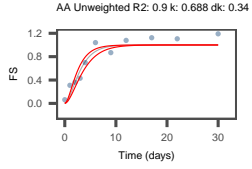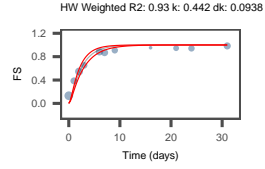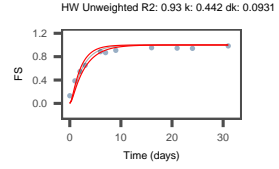

Supplement: mmc8.pdf [file mmc8.pdf]
