# Supplementary material for: Harmonizing Labeling and Analytical Strategies to Obtain Protein Turnover Rates in Intact Adult Animals
Source: PubMed Central journal article supplement (PMC9249856; doi:10.1016/j.mcpro.2022.100252), 2022-05-28

1433B

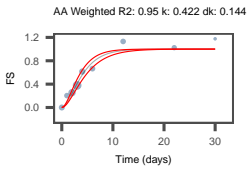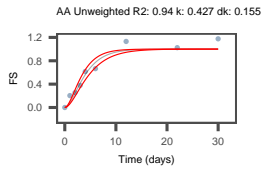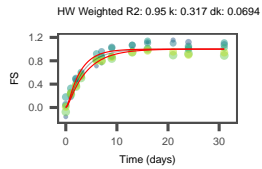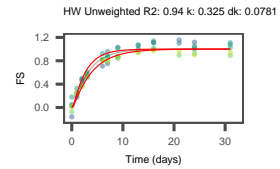

1433E

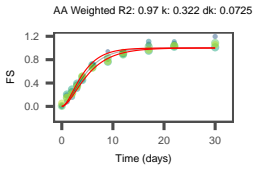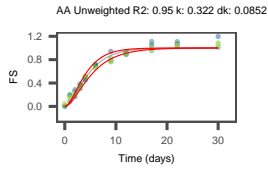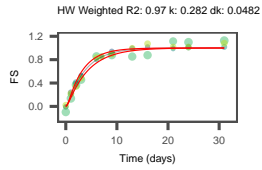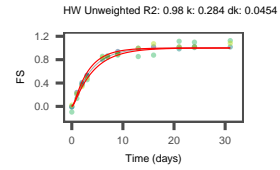

1433G

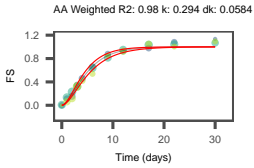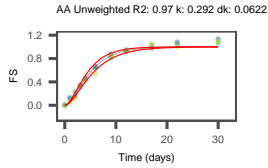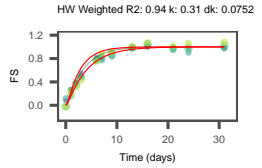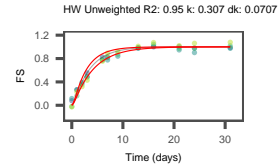

1433T

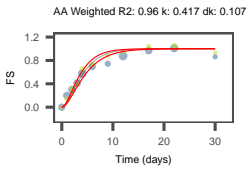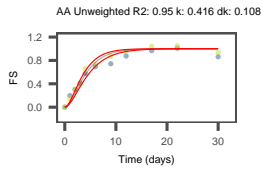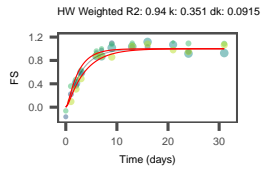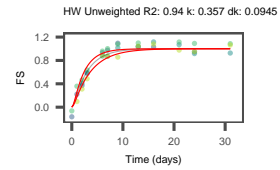

1433Z

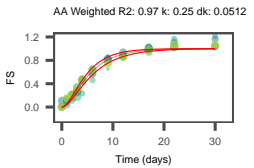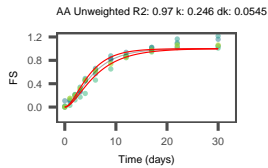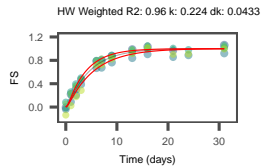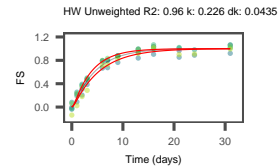

2AAA

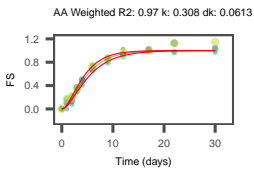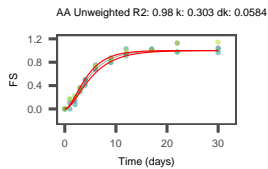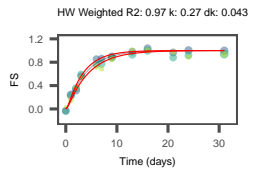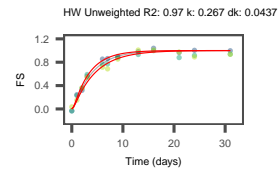

## 3HAO

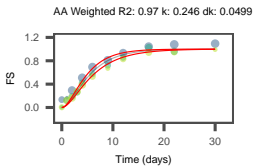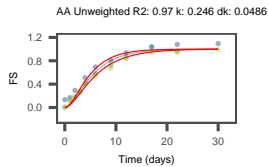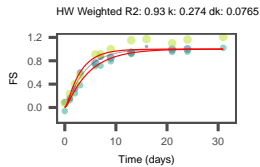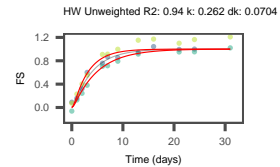

## 3HIDH

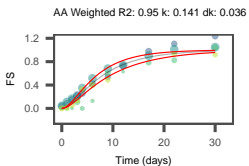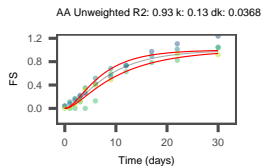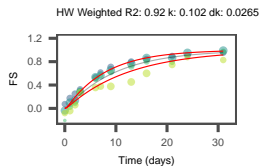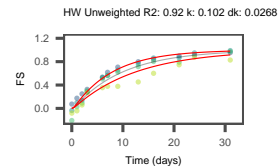

## 6PGD

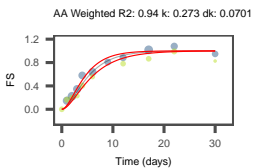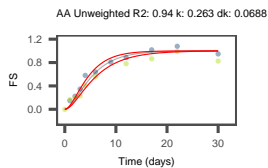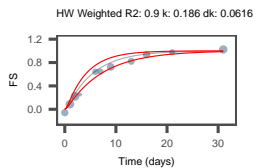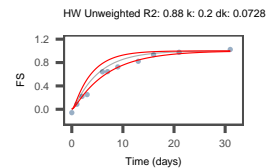

## 6PGL

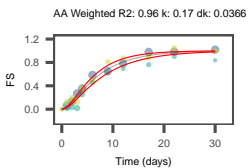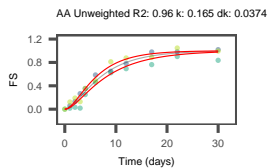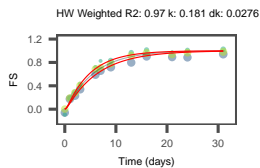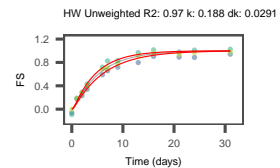

## AAAD

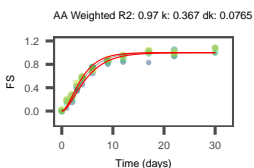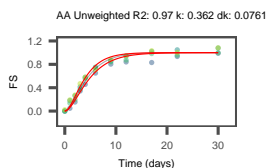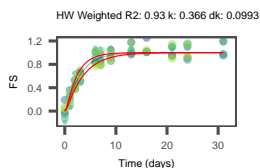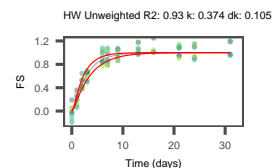

## AADAT

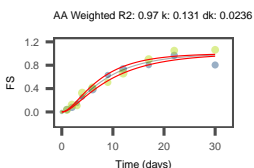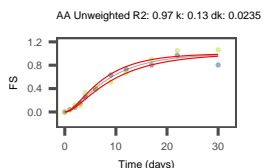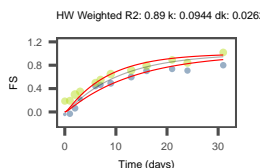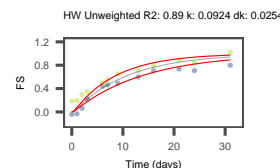

## AAKG1

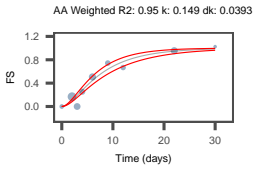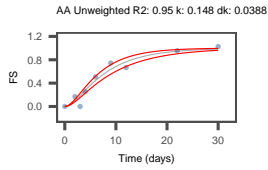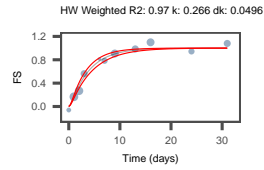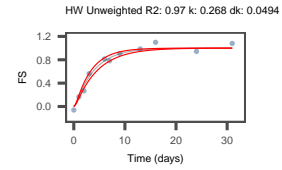

## AASS

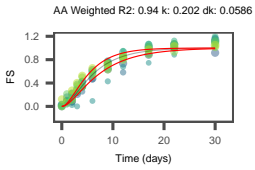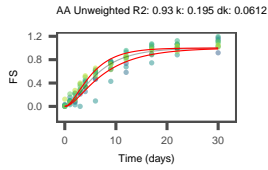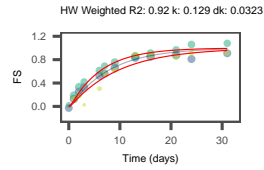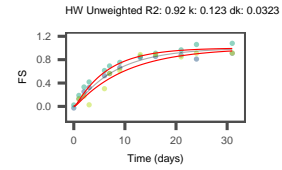

## AATC

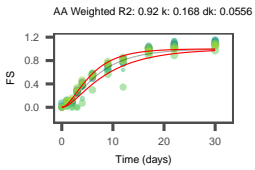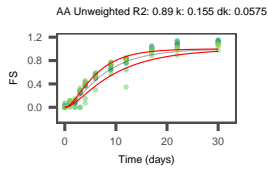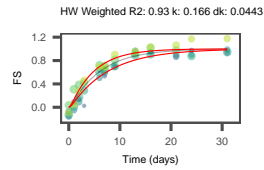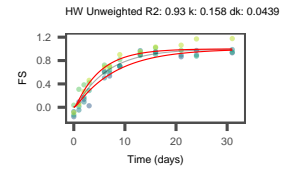

## AATM

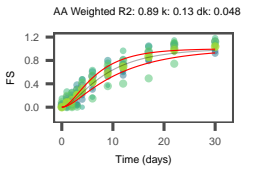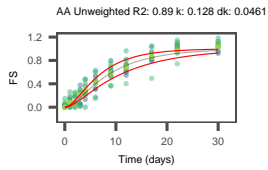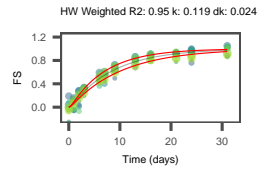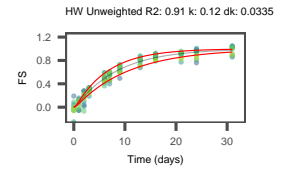

## ABCBB

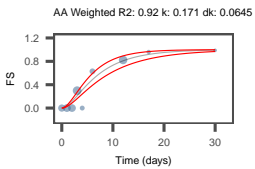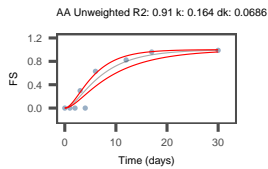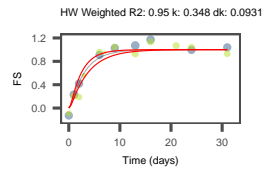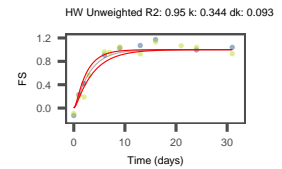

## ABCD3

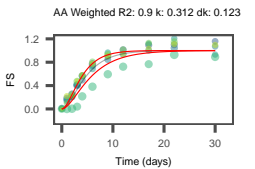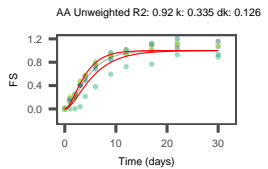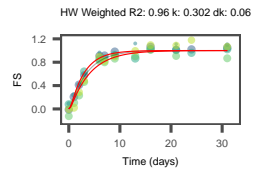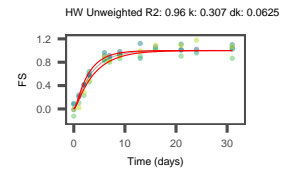

## ABHEB

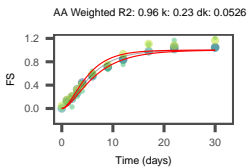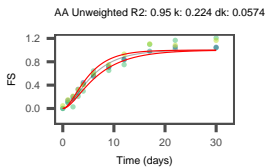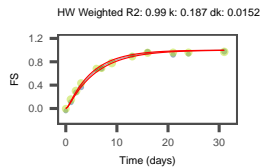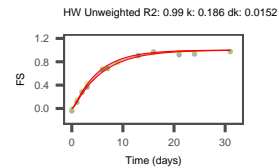

## ACACA

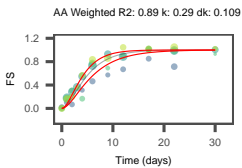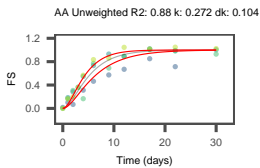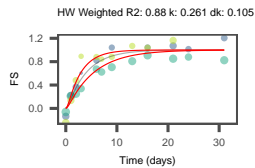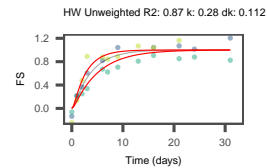

## ACAD8

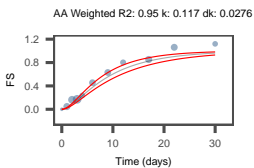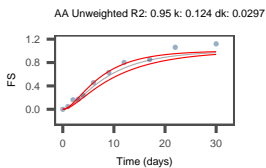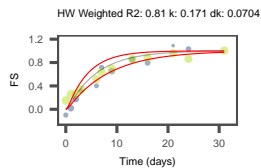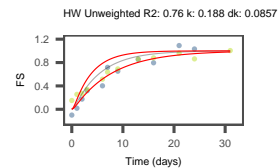

## ACADL

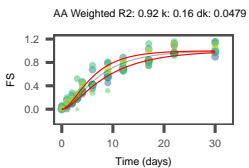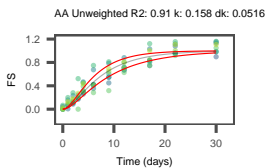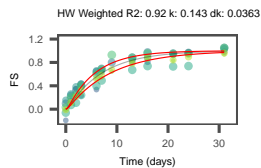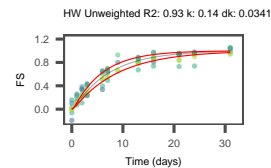

## ACADM

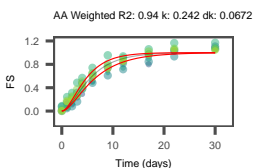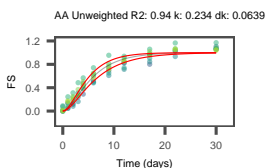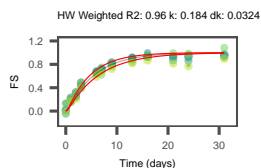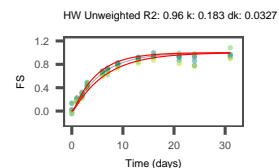

## ACADS

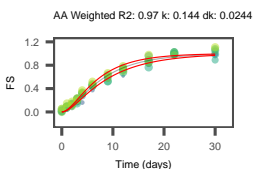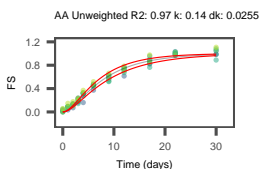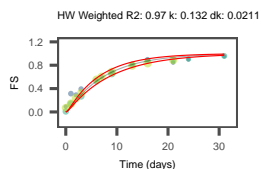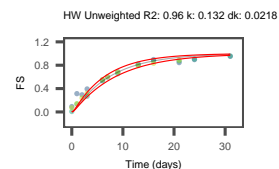



## ACADV

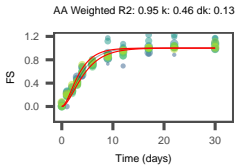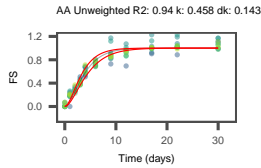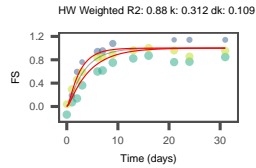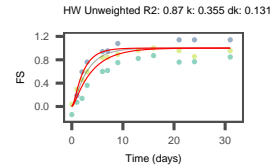

## ACBP

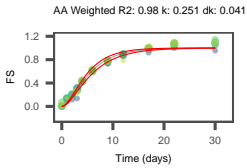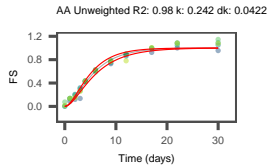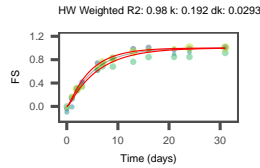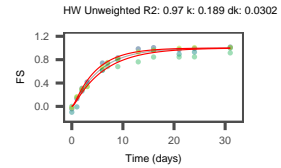

## ACD10

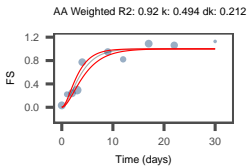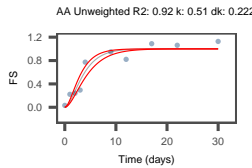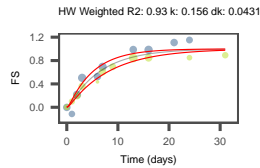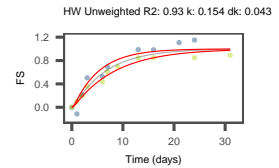

## ACD11

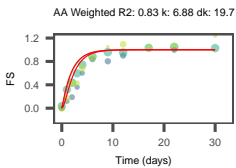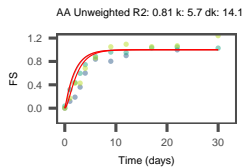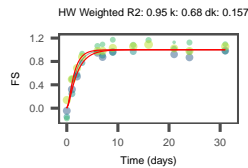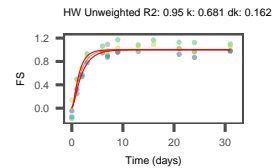

## ACDSB

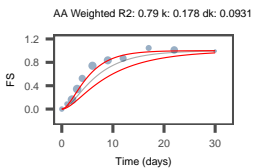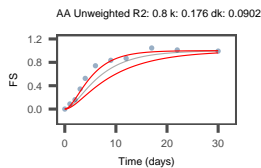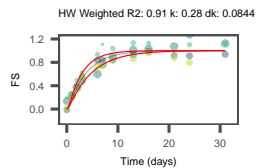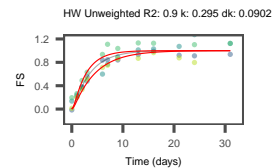

## ACLY

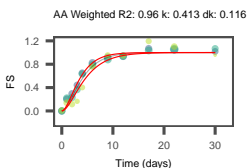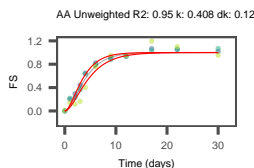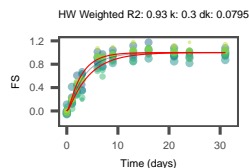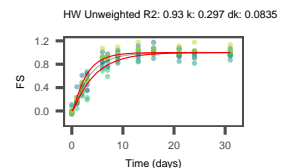

ACO12

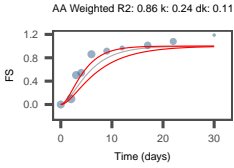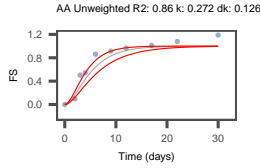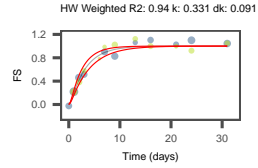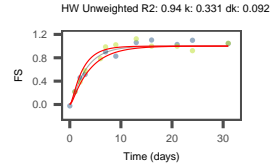

ACO13

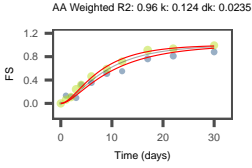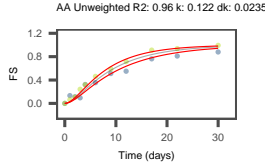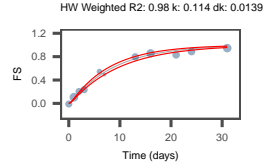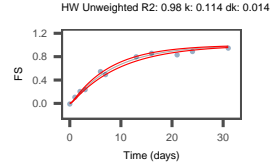

ACOC

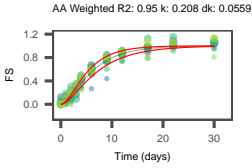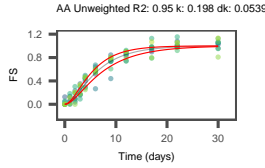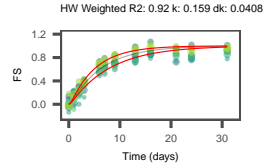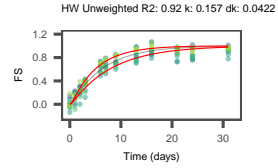

ACON

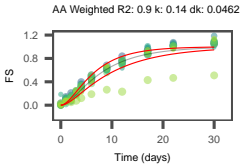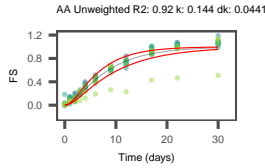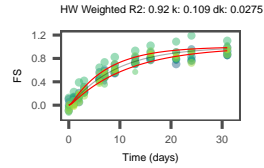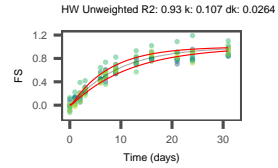

ACOX1

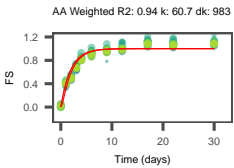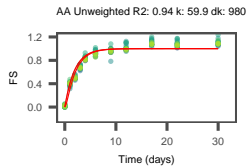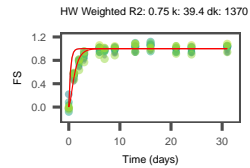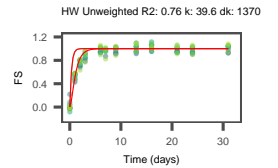

ACOX2

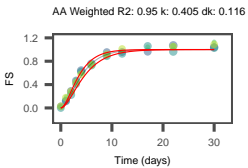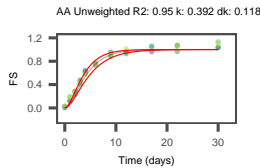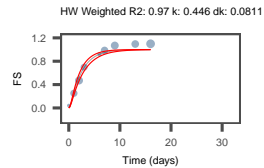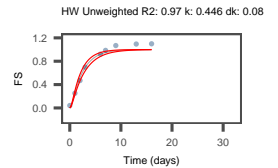

## ACPM

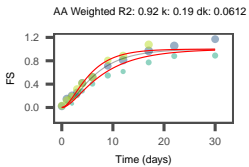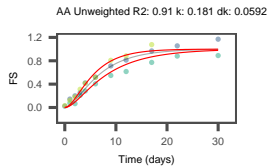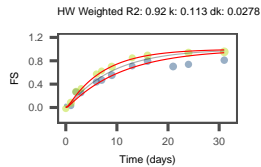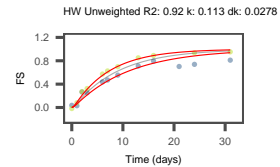

## ACSA

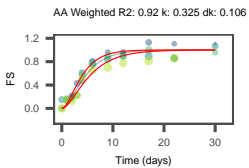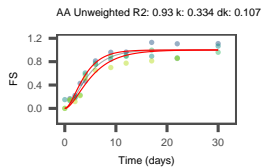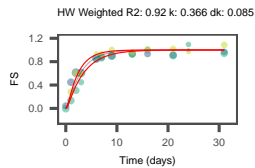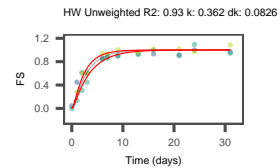

## ACSF2

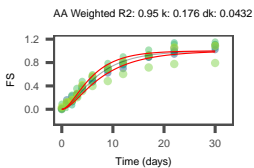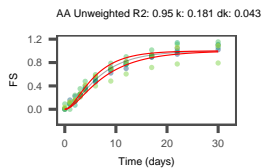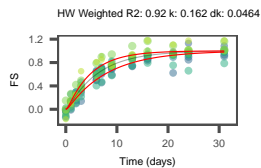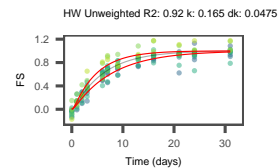

## ACSL1

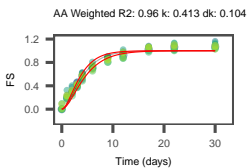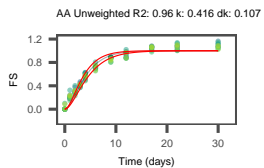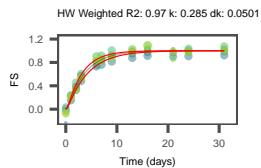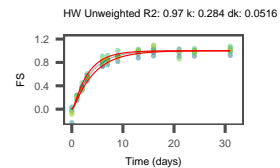

## ACSL5

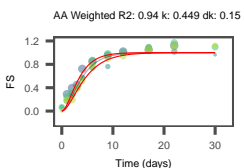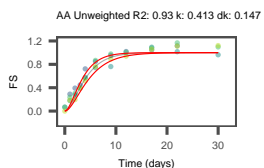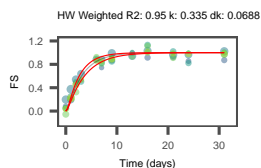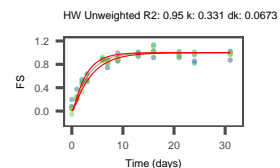

## ACSM1

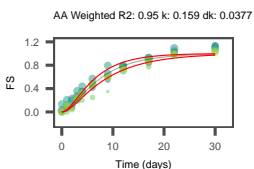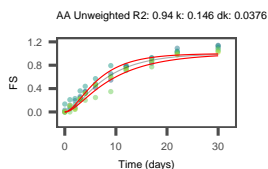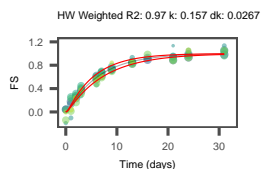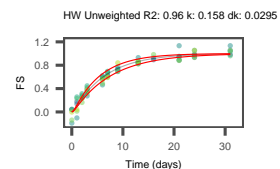

## ACSM3

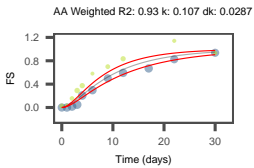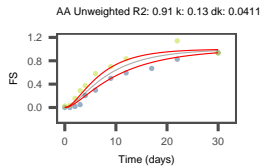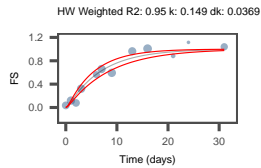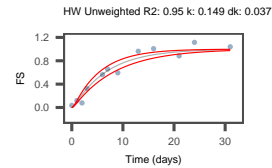

## ACSM5

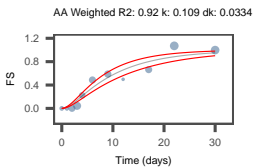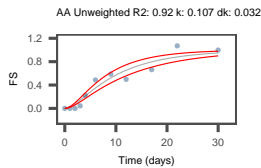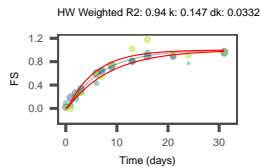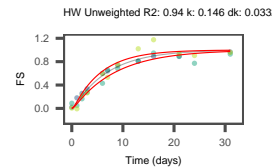

## ACSS3

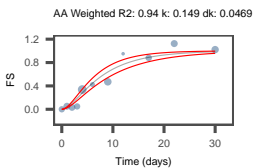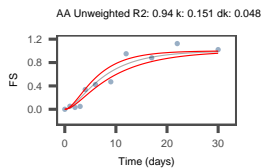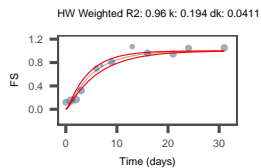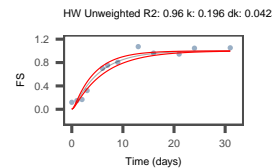

## ACTN1

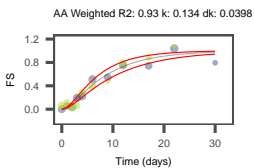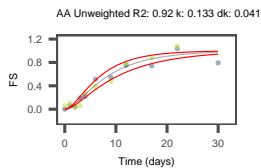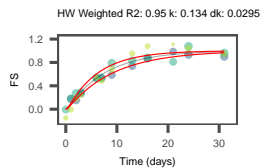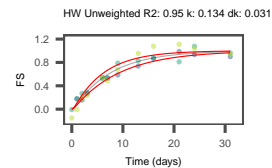

## ACTN4

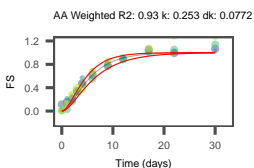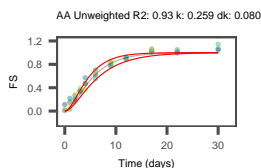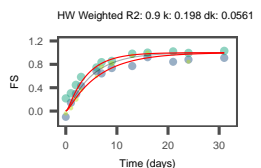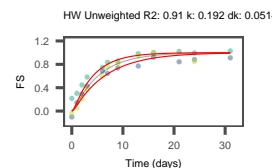

## ACY1

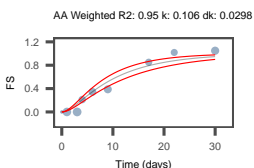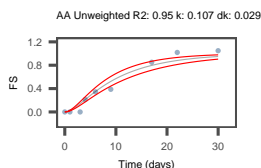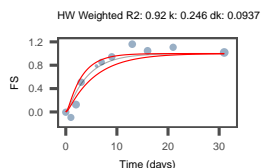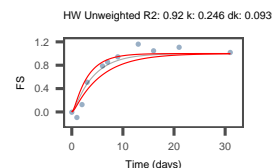

ACY3

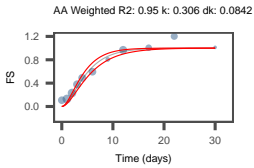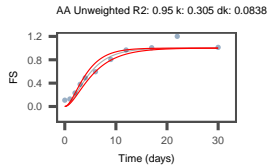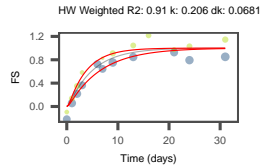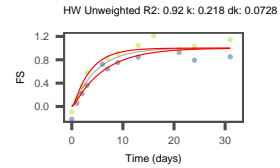

ADH1

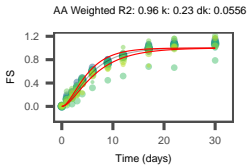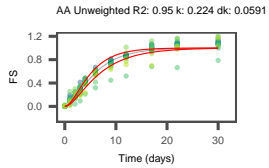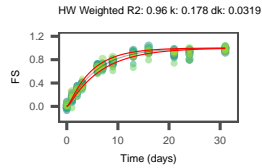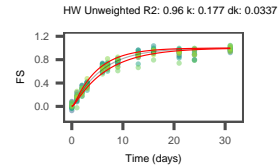

ADHX

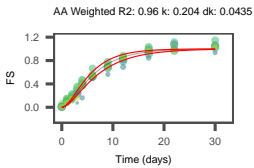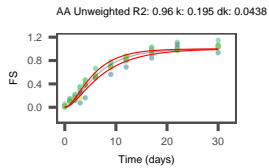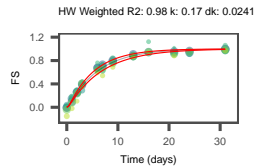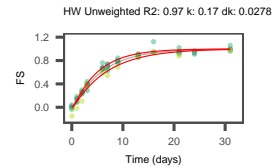

ADK

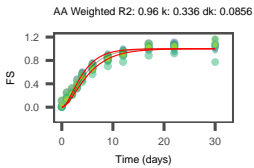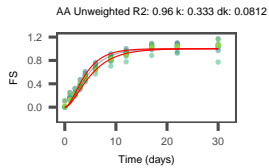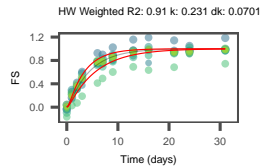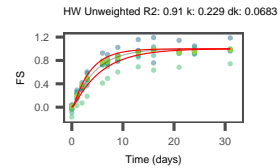

ADT2

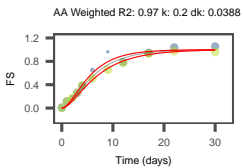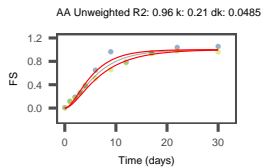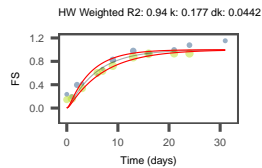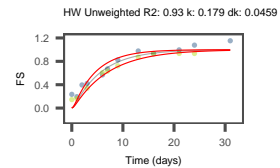

AGT2

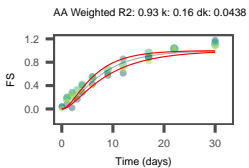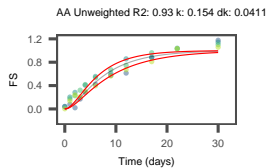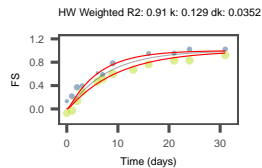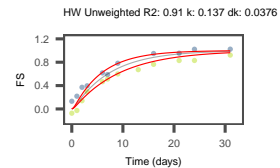

## AIFM1

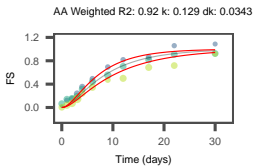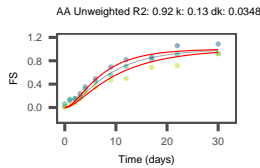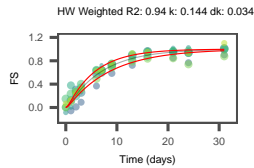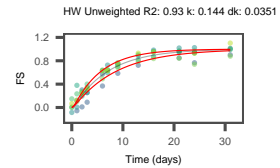

## AIMP2

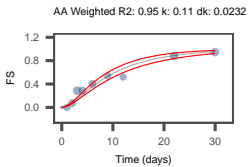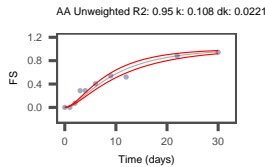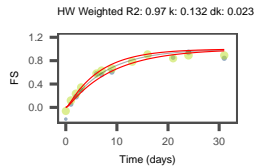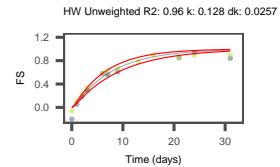

## AK1A1

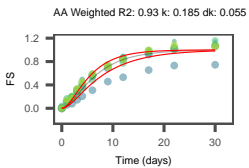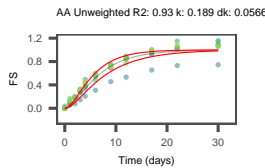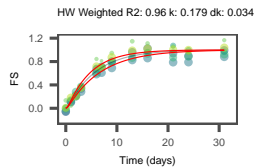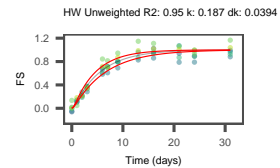

## AK1CD

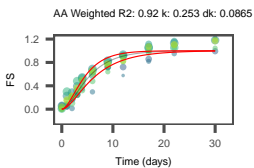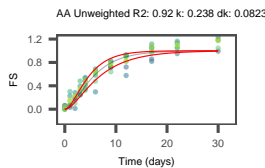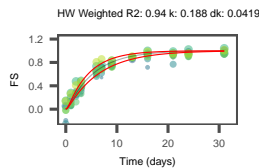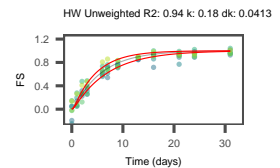

## AK1D1

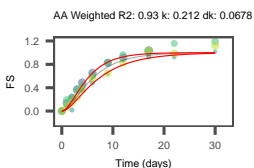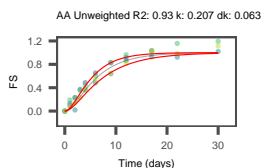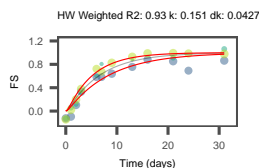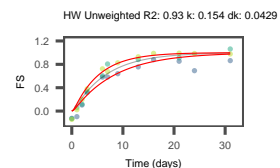

## AL1A1

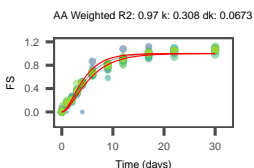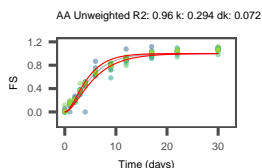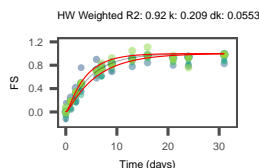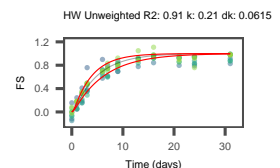

AL1A7

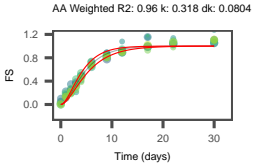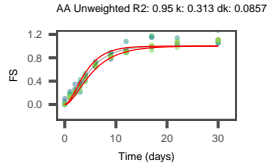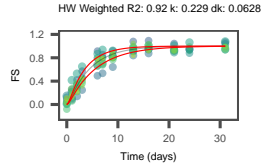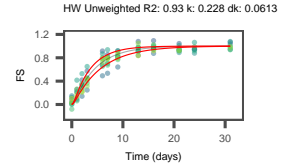

AL1B1

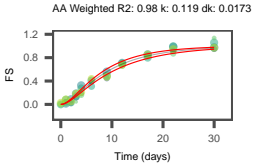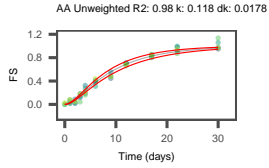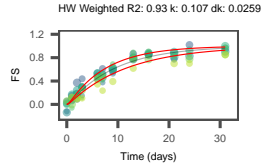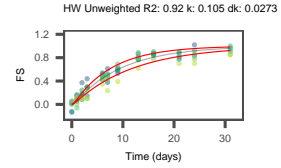

AL1L1

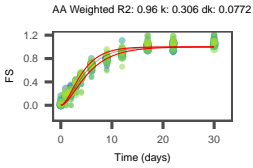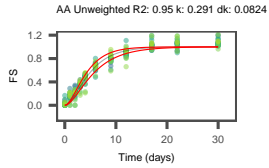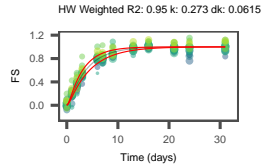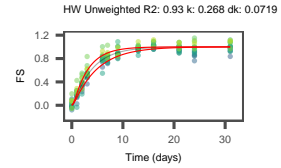

AL3A2

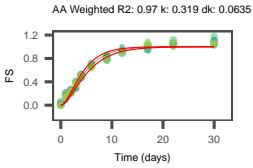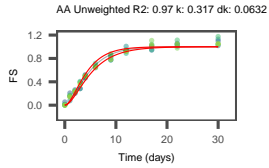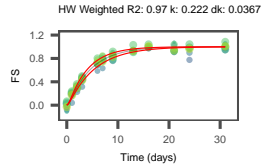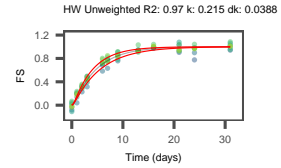

AL4A1

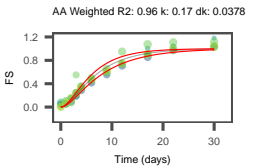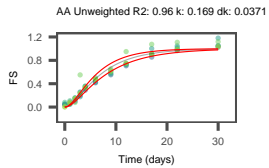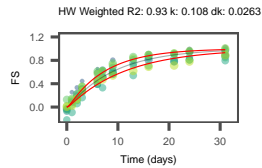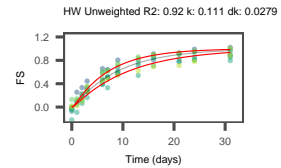

AL7A1

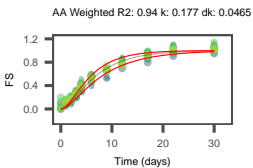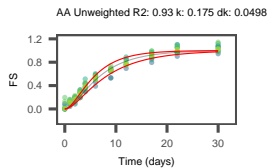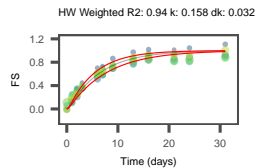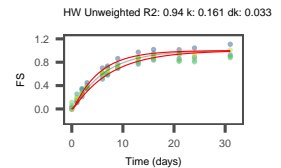

AL8A1

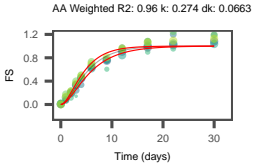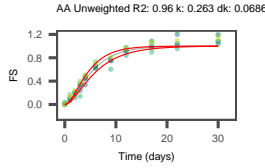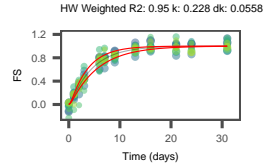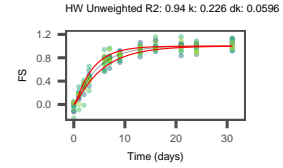

AL9A1

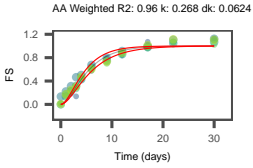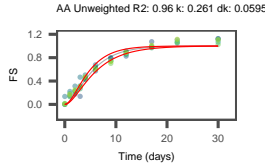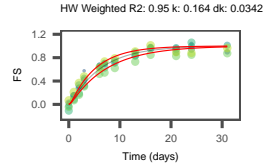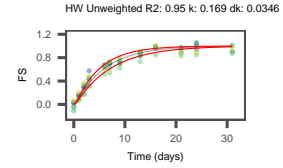

ALAT1

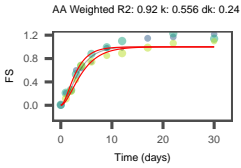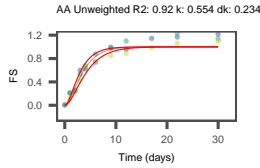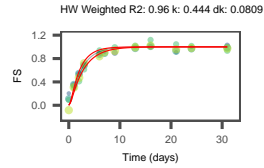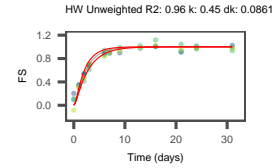

ALAT2

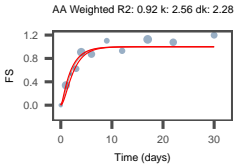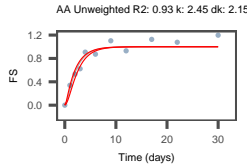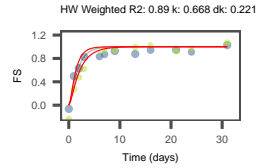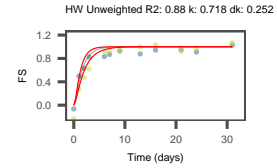

ALBU

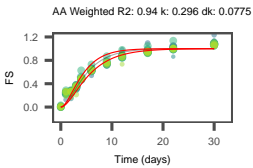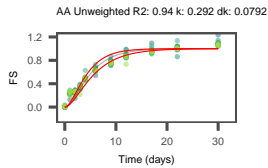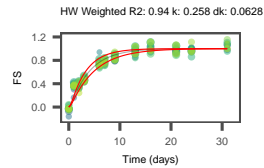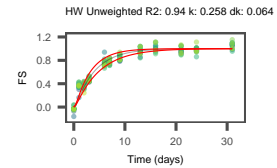

ALDH2

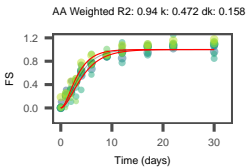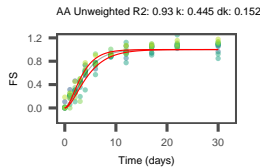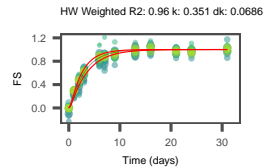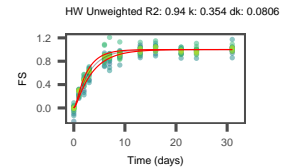



## ALDOB

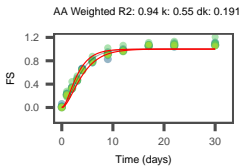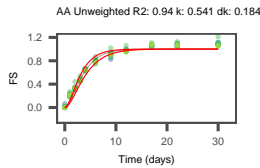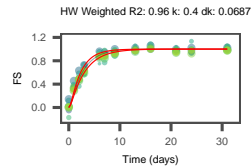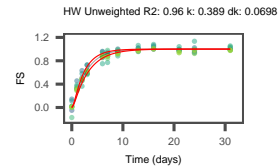

## AMPL

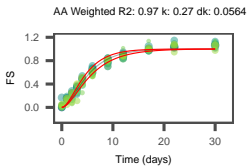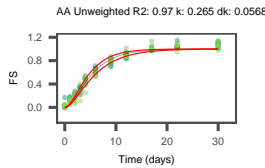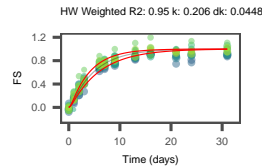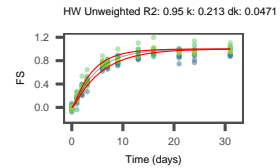

## AMPN

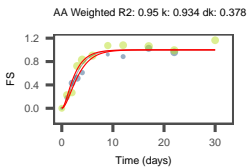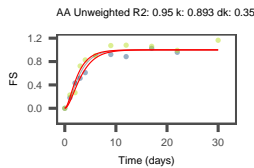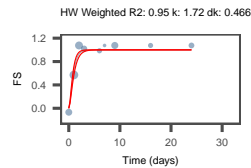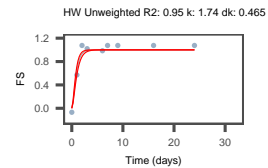

## ANT3

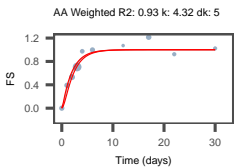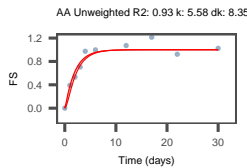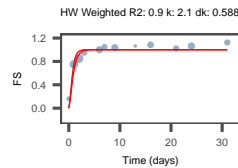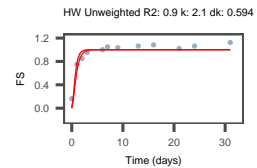

## ANXA2

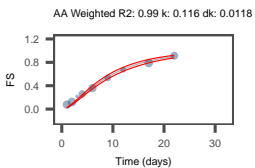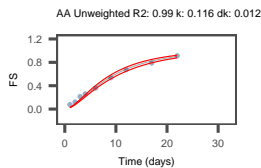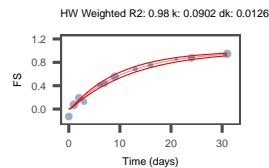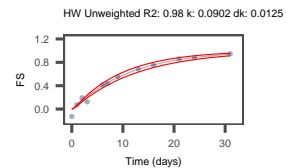

## ANXA6

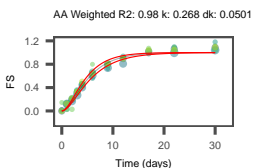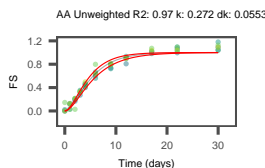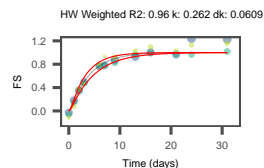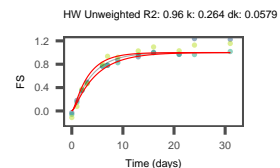

**AOFB**

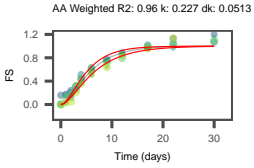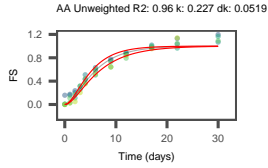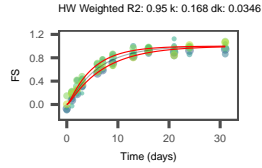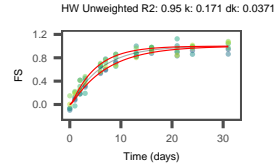

**AOXC**

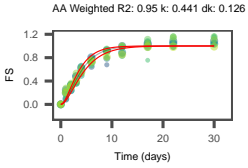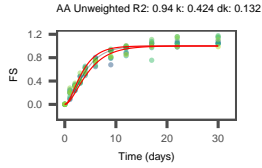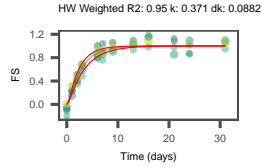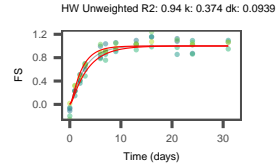

**AP1B1**

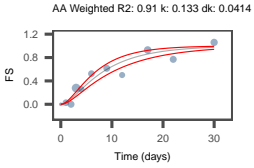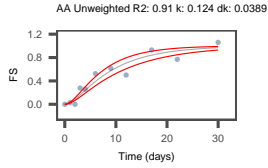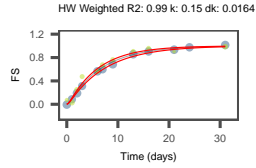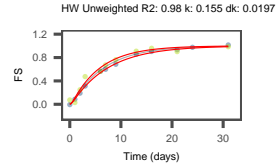

**AP2B1**

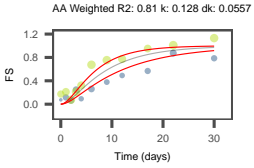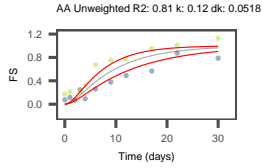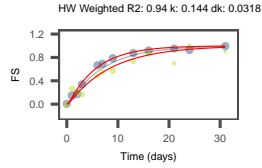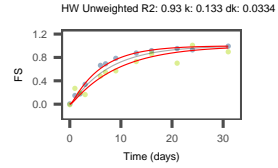

**APEH**

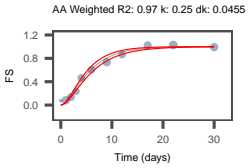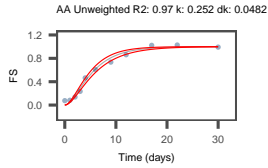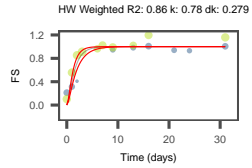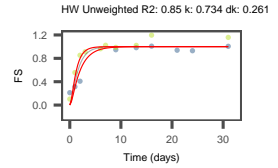

**APOA1**

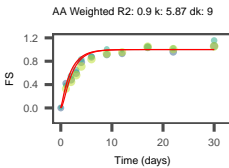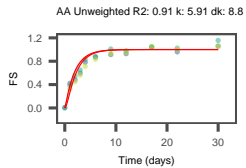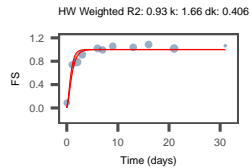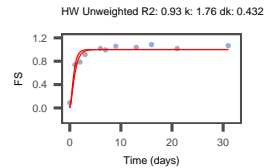

APOB

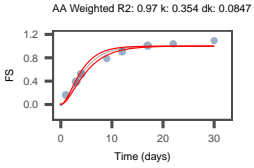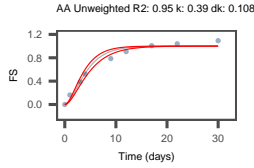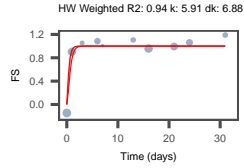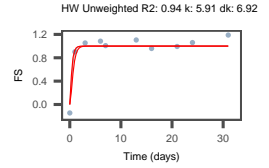

ARF6

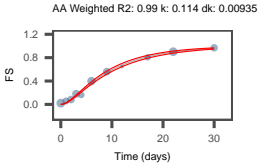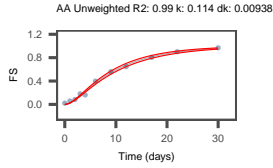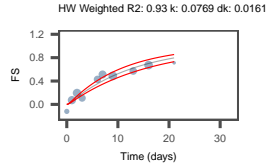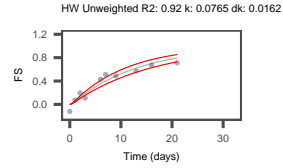

ARGH1

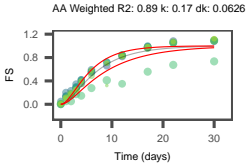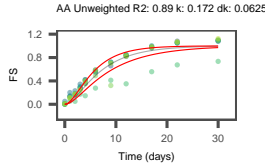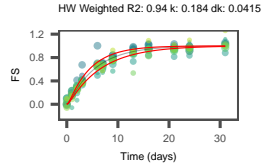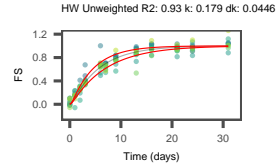

ARK72

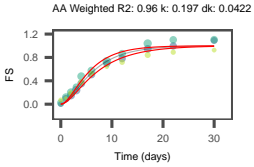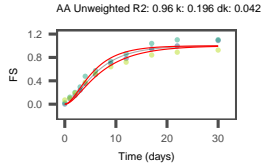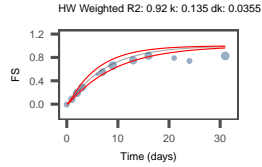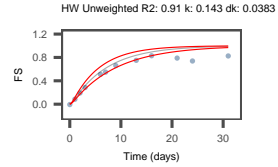

ARLY

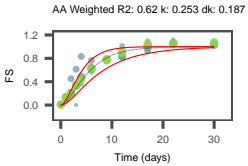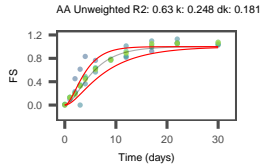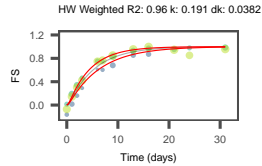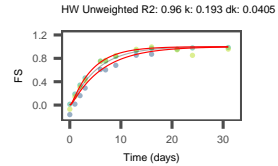

ARP3

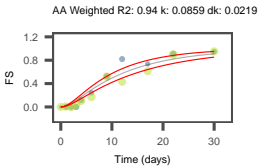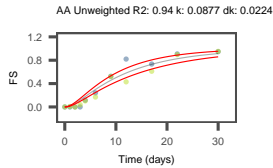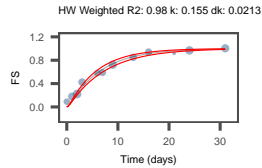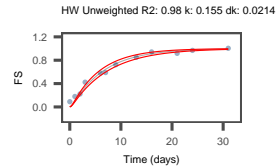

ARPC4

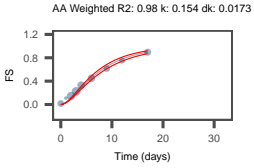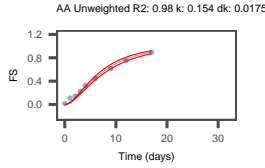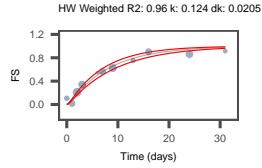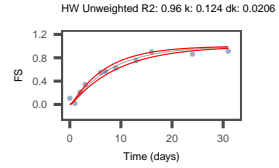

ARPC5

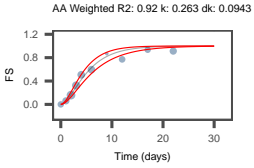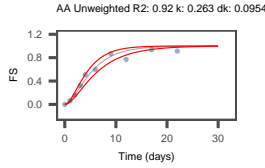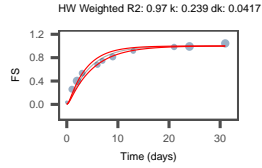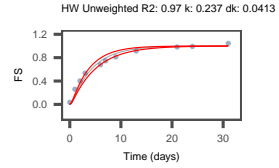

ASPD

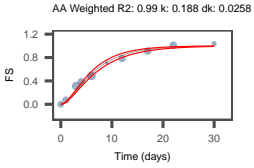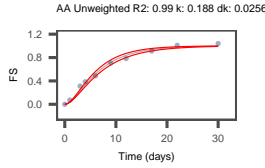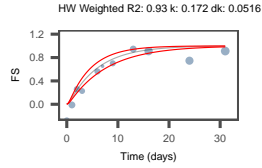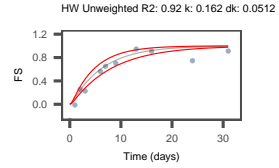

ASSY

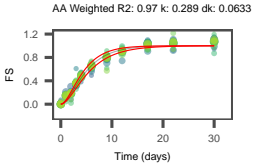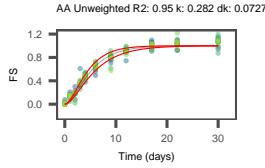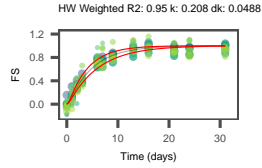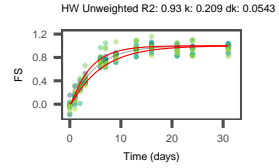

AT11C

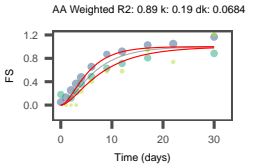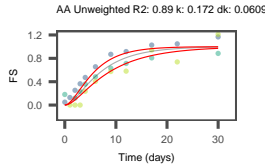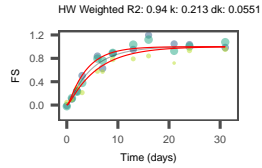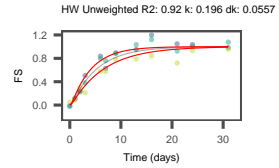

AT1A1

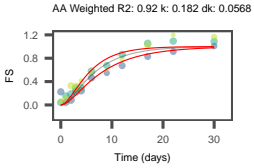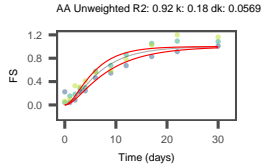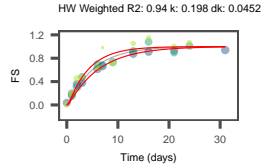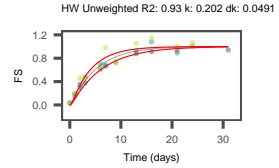

## AT1B1

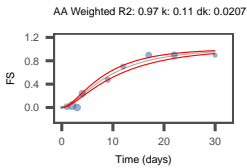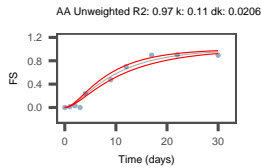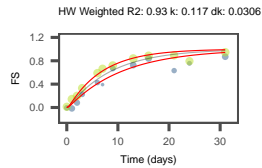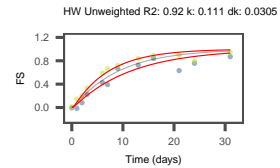

## AT5F1

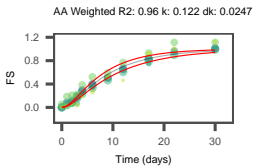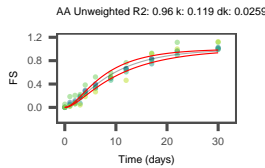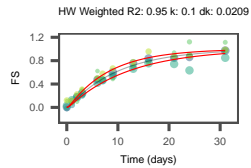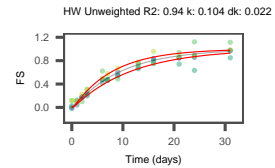

## ATLA2

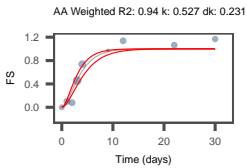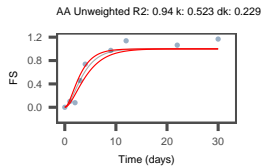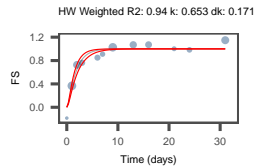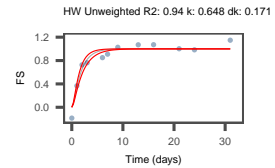

## ATP5H

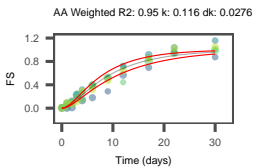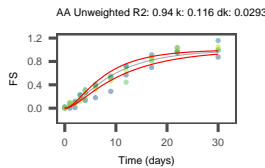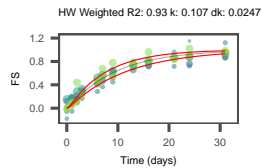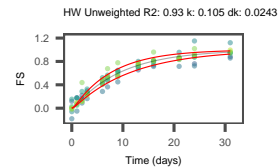

## ATP5I

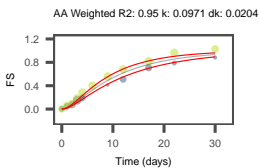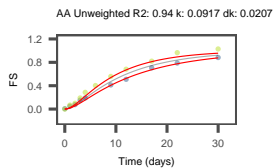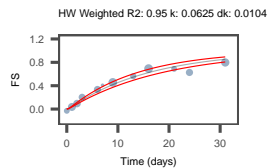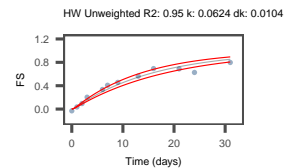

## ATP5J

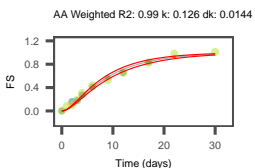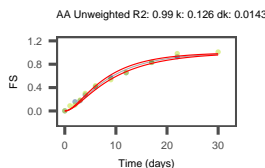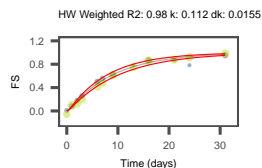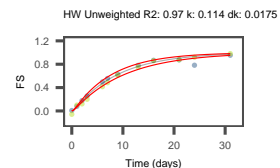

## ATP5L

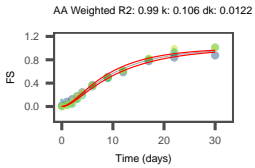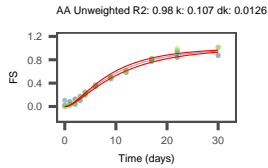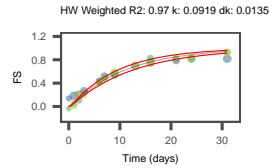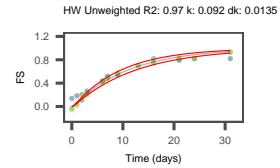

## ATPA

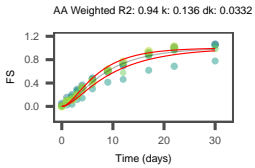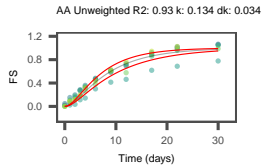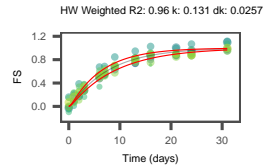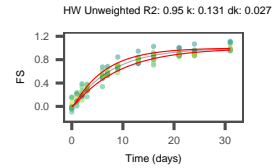

## ATPB

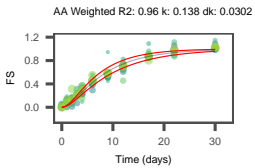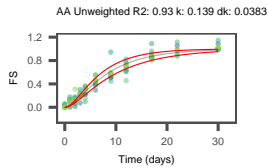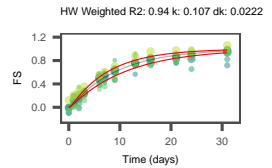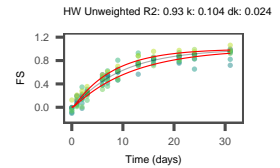

## ATPD

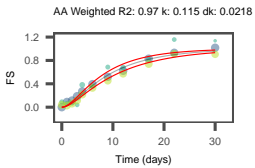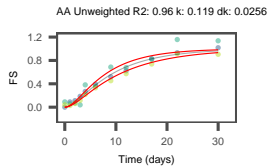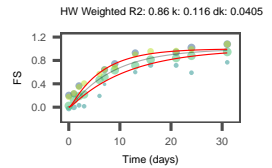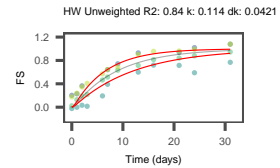

## ATPG

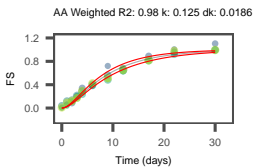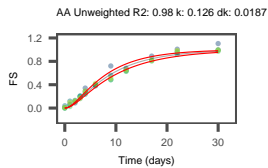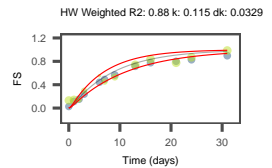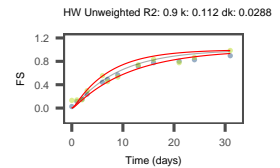

## ATPO

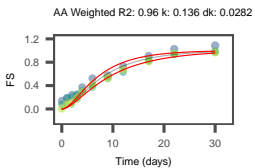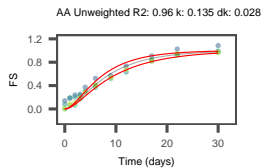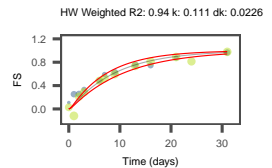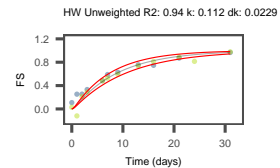

**B2MG**

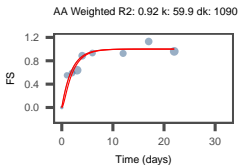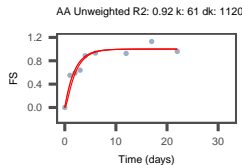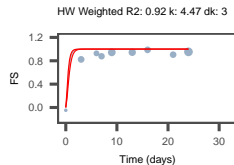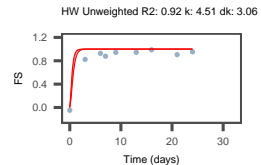

**BAA1**

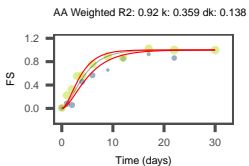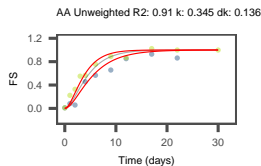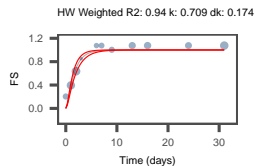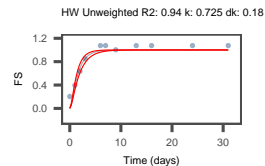

**BAP31**

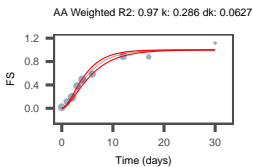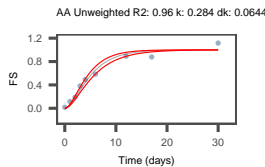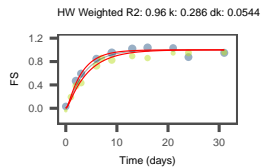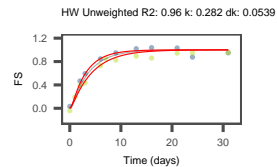

**BDH**

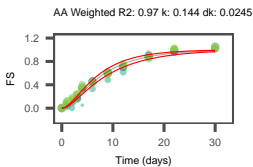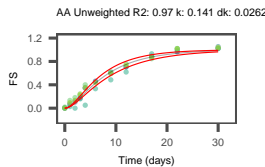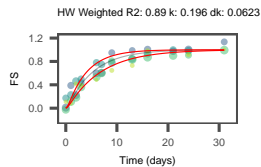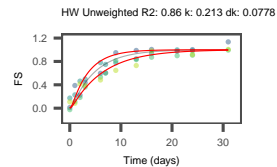

**BGLR**

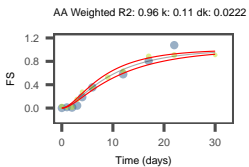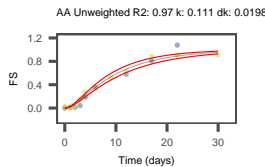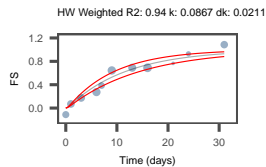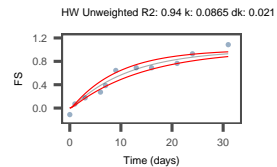

**BHMT1**

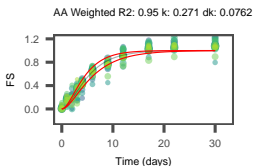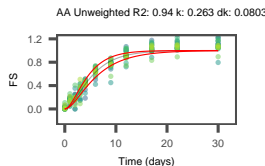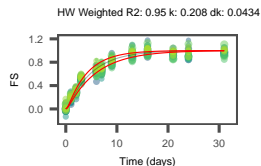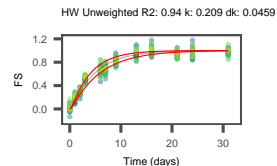

BIP

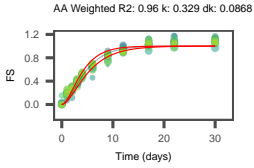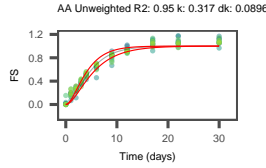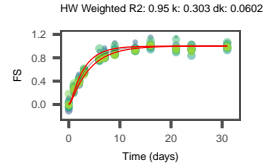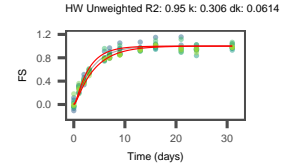

BPHL

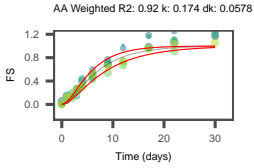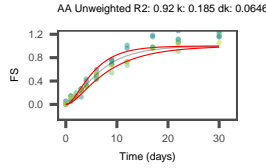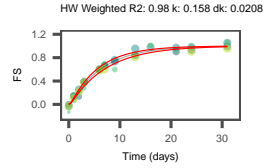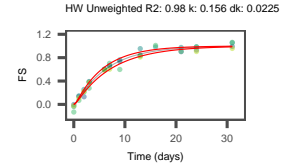

BPNT1

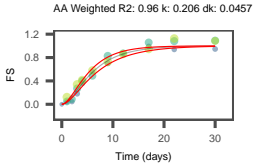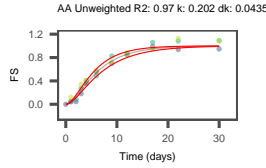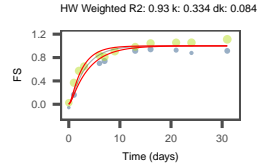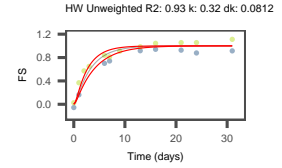

C1TC

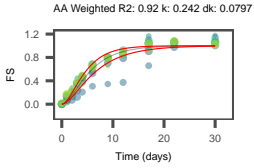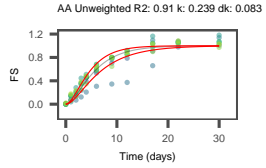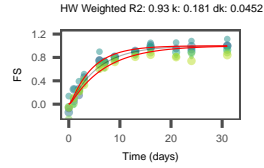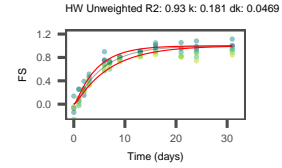

C560

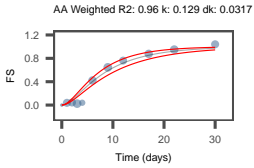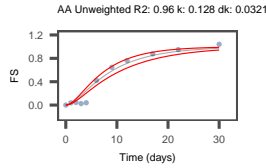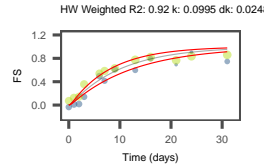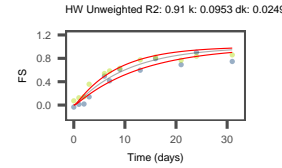

CAH3

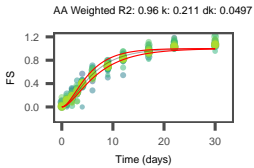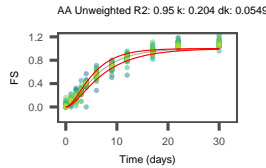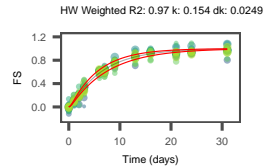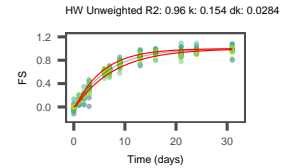



## CALR

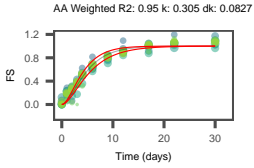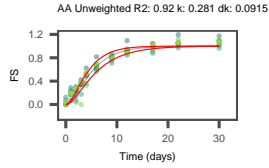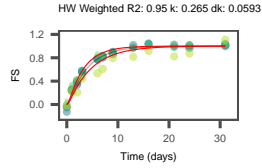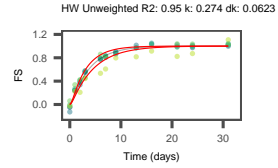

## CALU

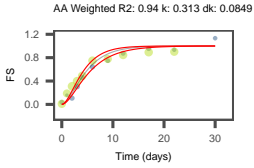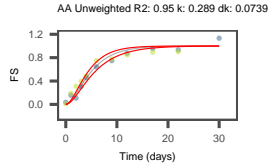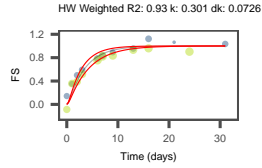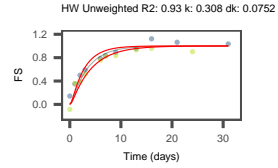

## CALX

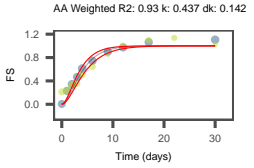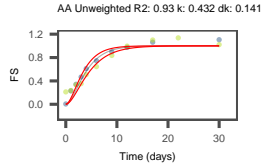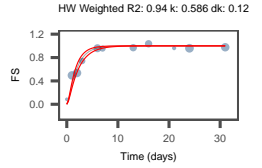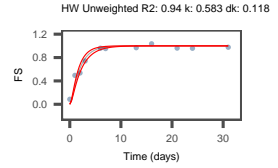

## CAND1

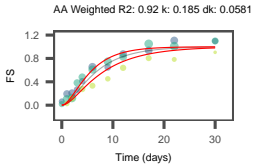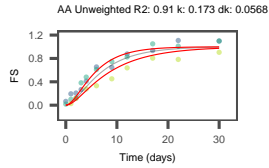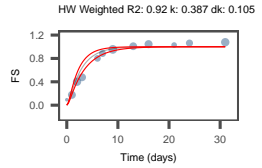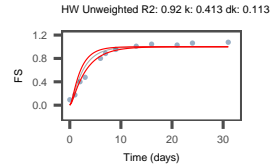

## CAP1

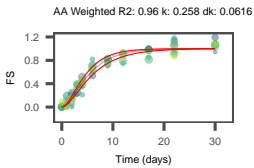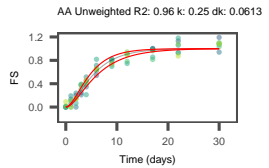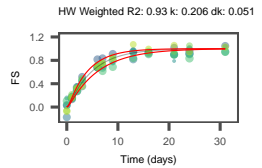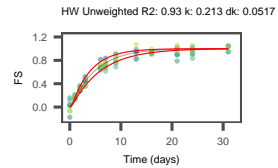

## CAPZB

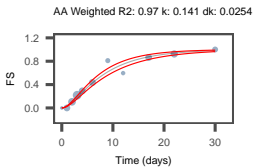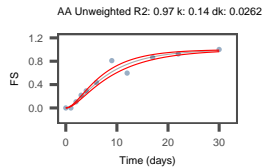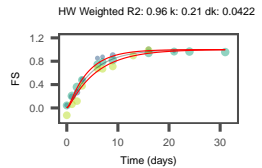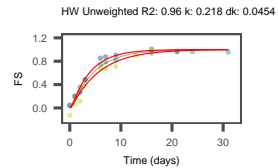

## CATA

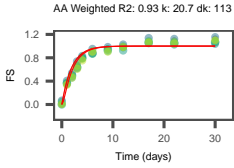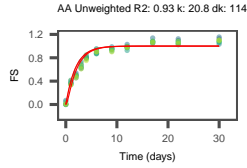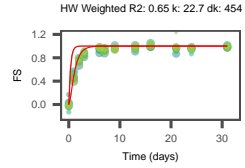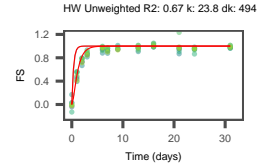

## CATB

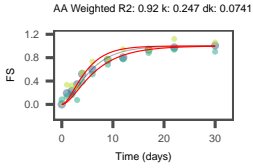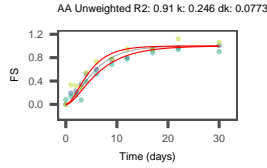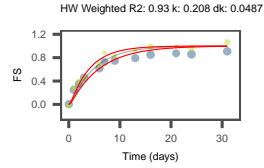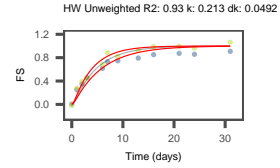

## CATD

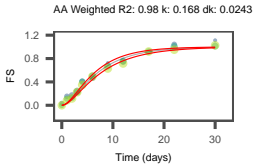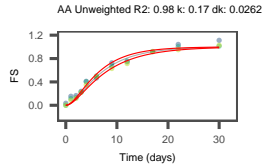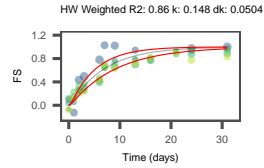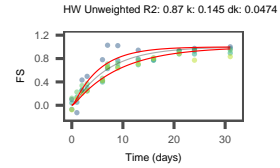

## CATF

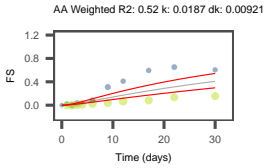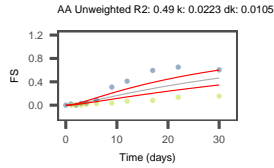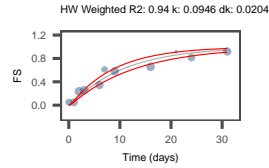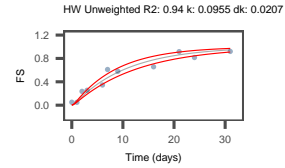

## CATZ

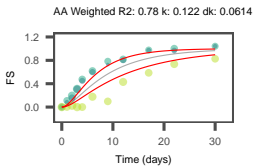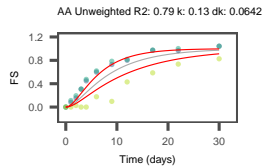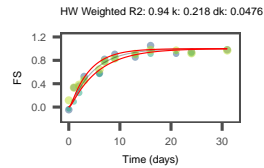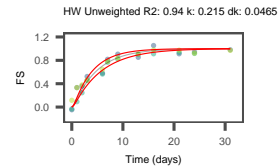

## CBPQ

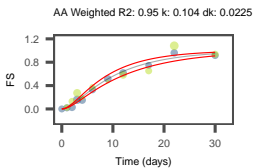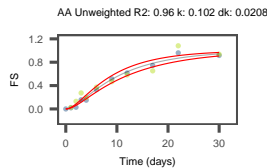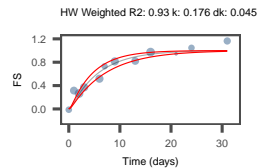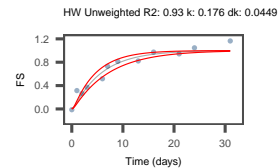

## CBR1

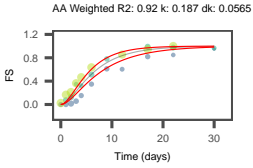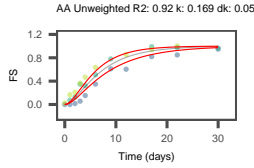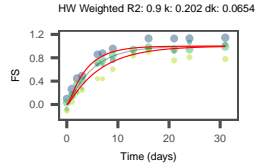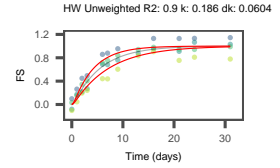

## CBR4

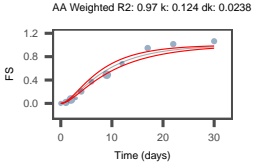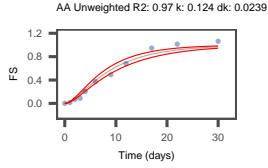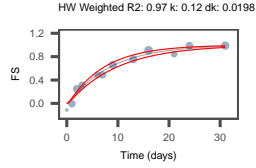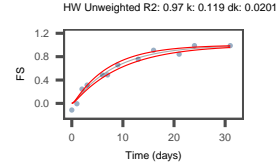

## CBS

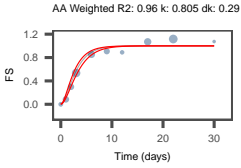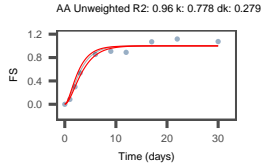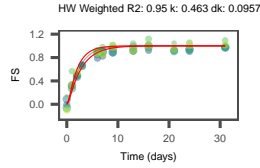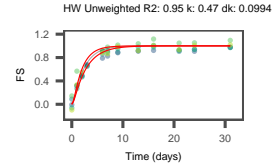

## CDC42

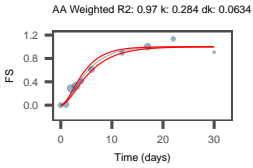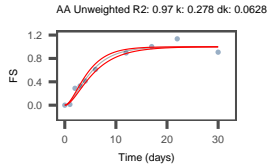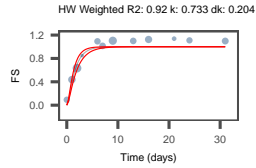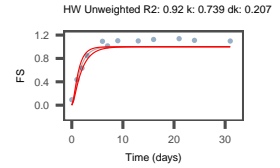

## CGL

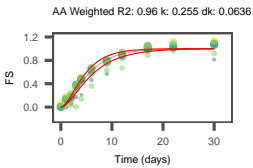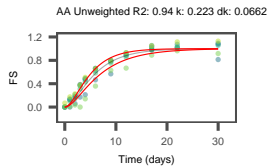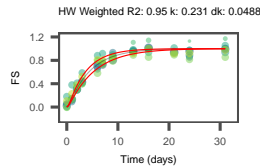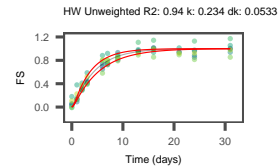

## CH10

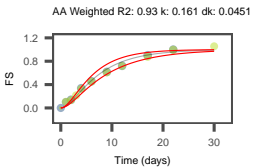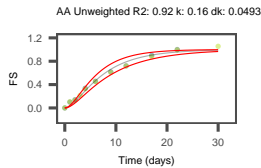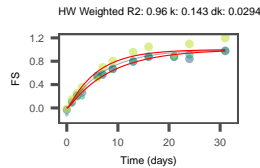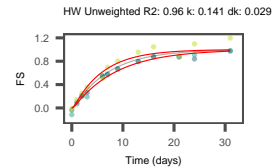

CH60

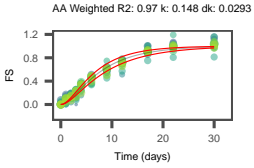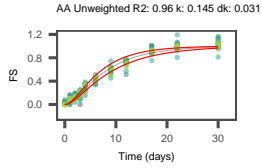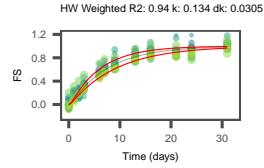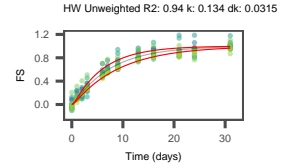

CHDH

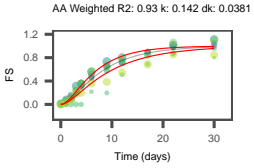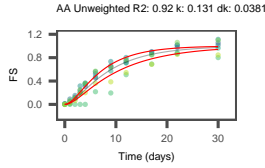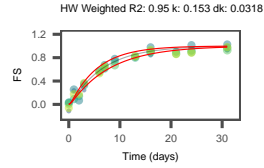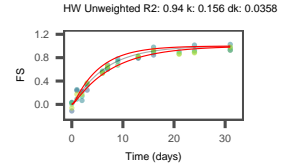

CISD1

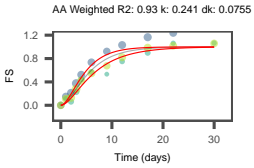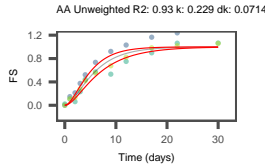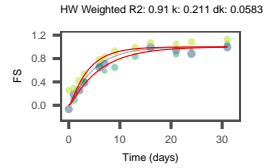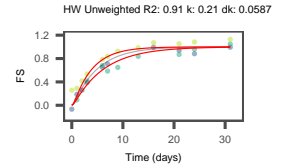

CISY

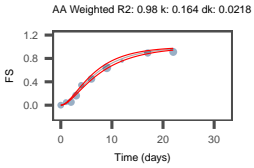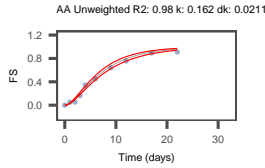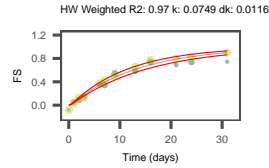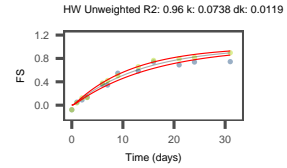

CK054

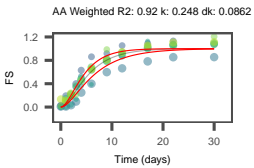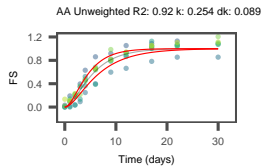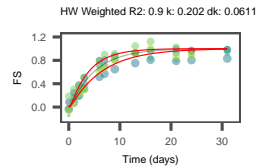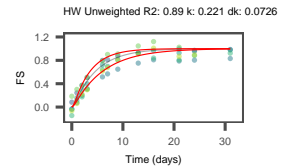

CLH1

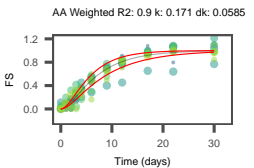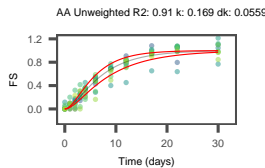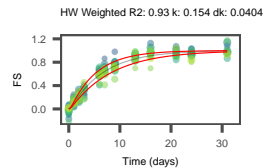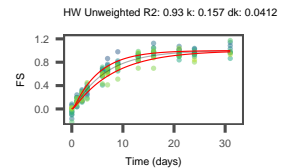

## CLPP

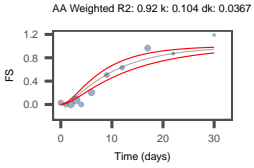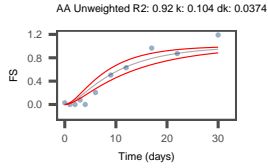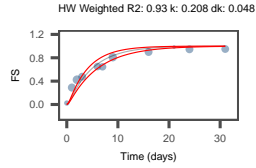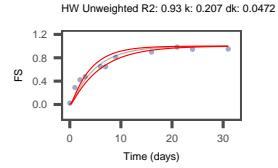

## CLYBL

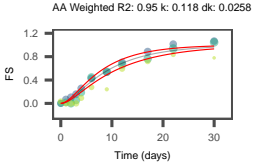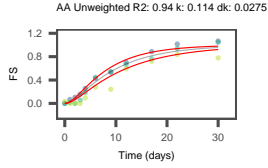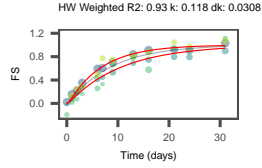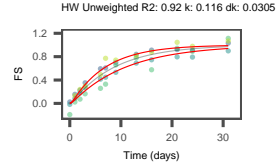

## CMBL

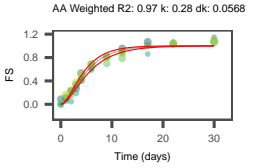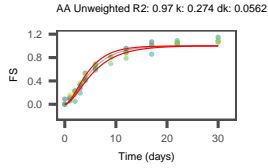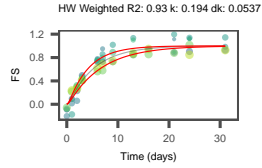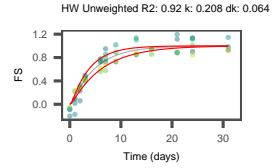

## CMC2

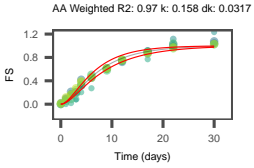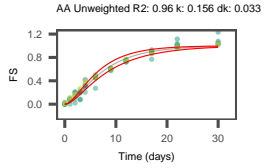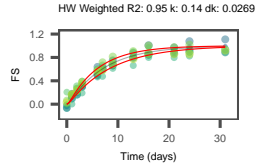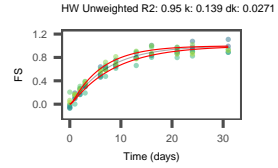

## CNBP

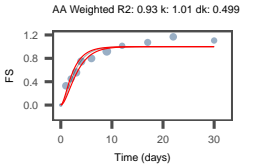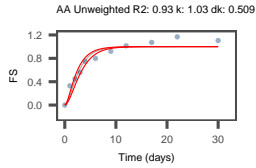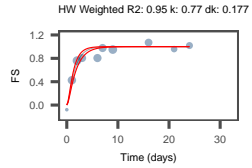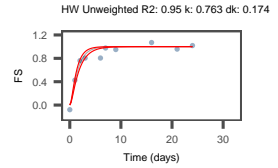

## CNDP2

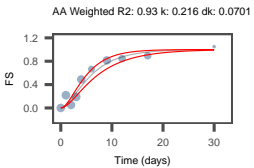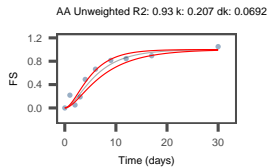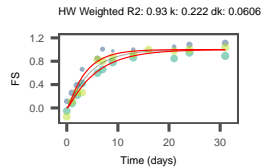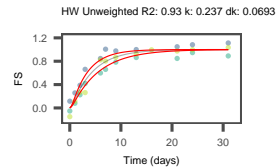

## COASY

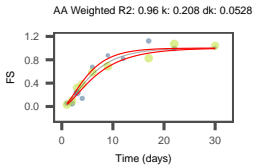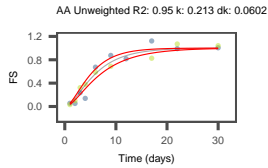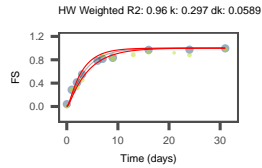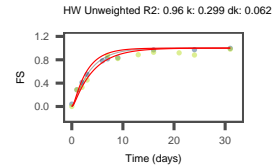

## COF1

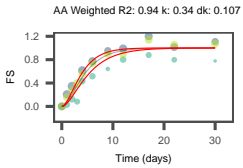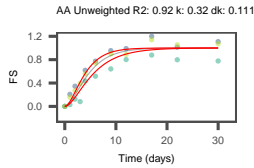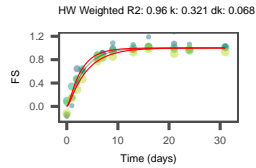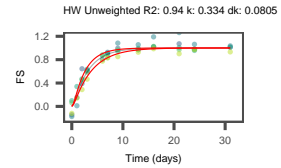

## COMT

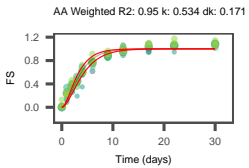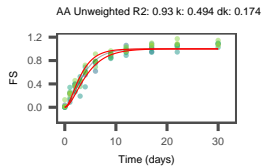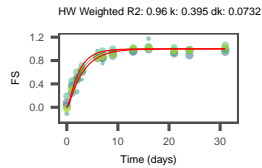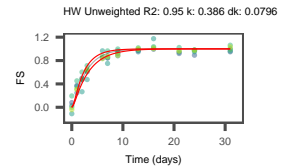

## COPB

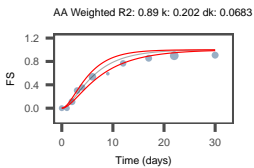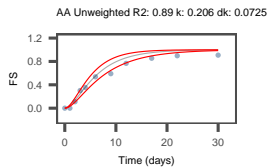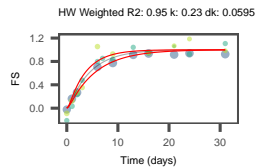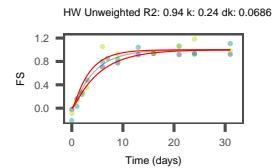

## COPB2

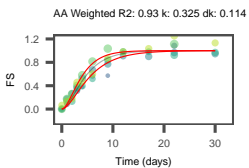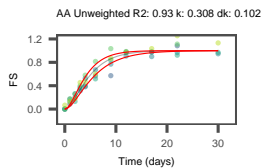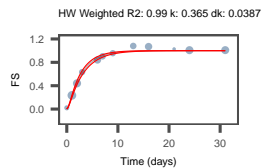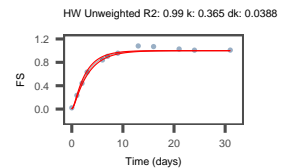

## COPD

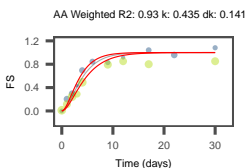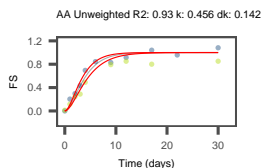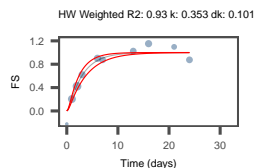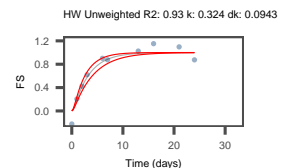

## COPG1

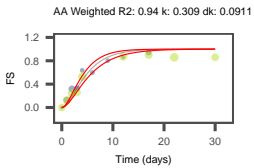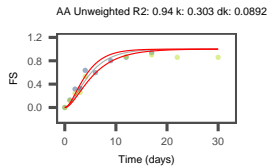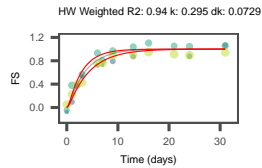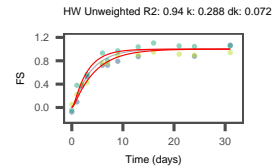

## COQ6

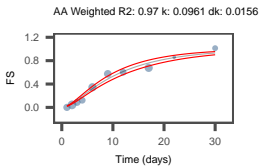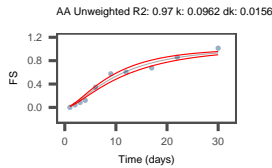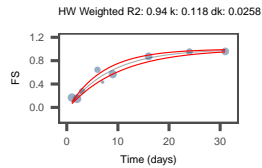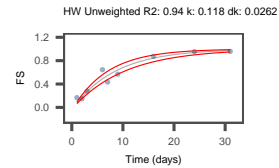

## COX1

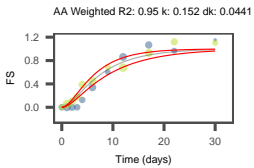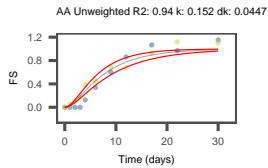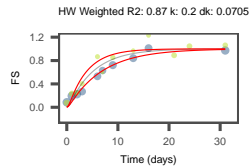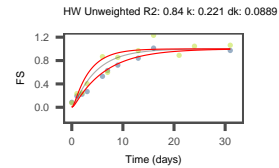

## COX2

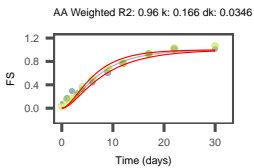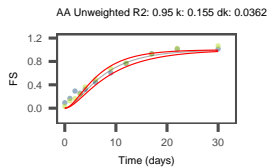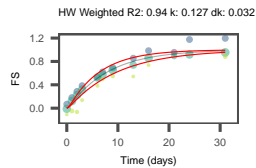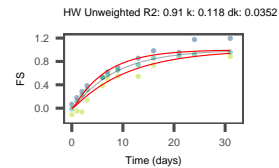

## COX3

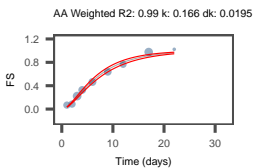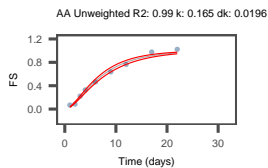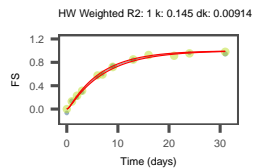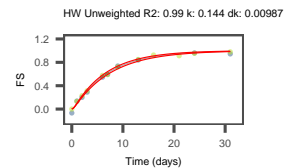

## COX41

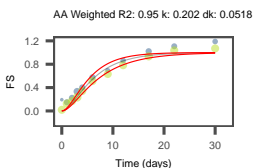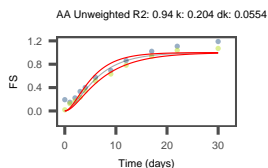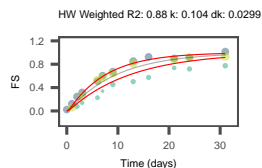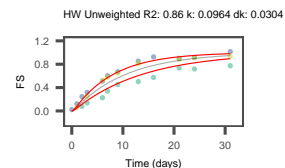

COX5A

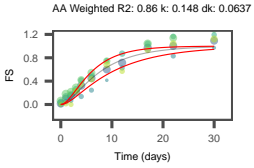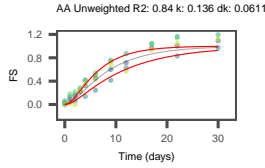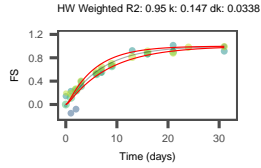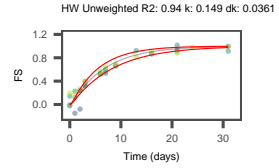

COX5B

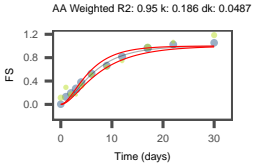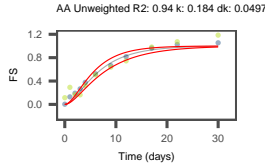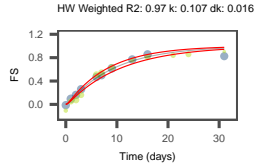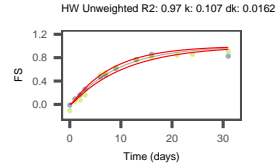

COX6C

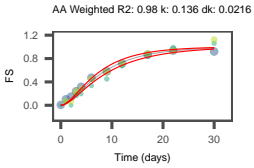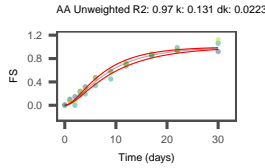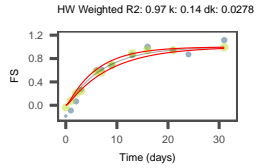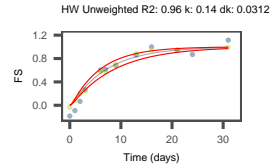

CP1A2

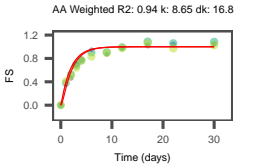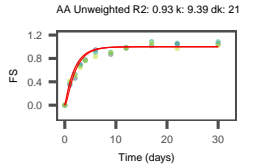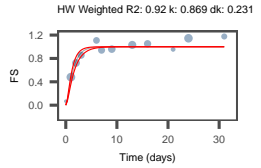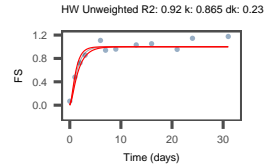

CP254

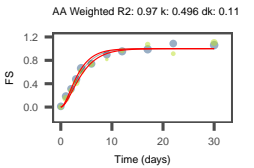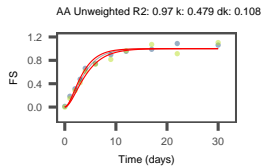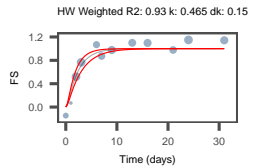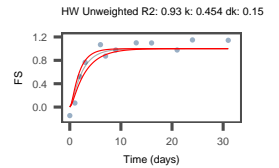

CP27A

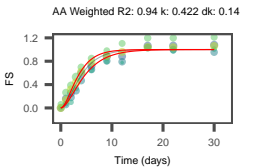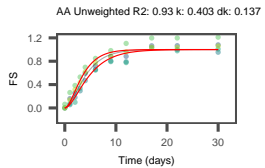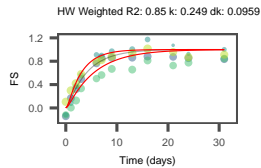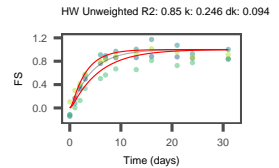



## CP2AC

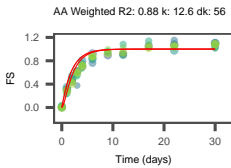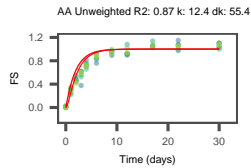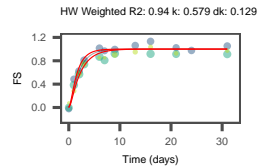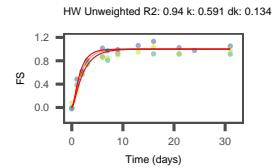

## CP2CN

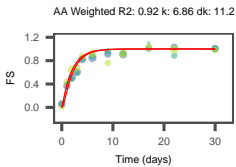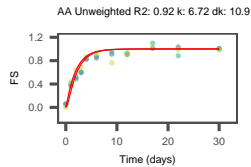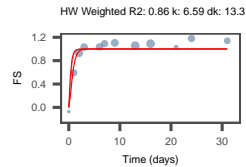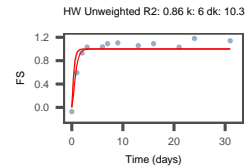

## CP2CT

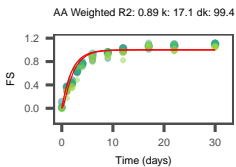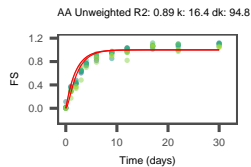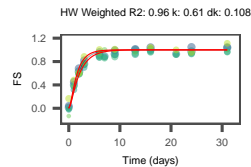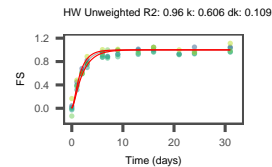

## CP2D9

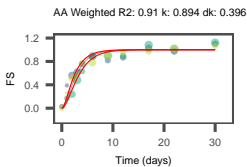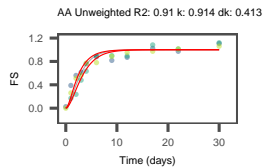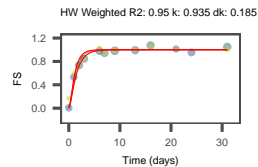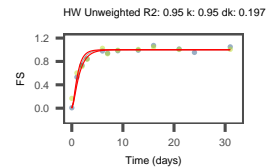

## CP2DQ

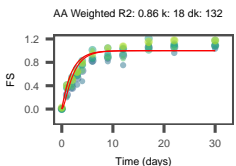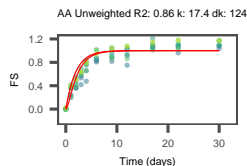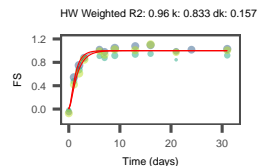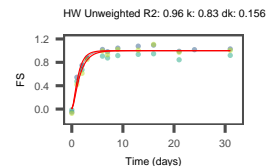

## CP2E1

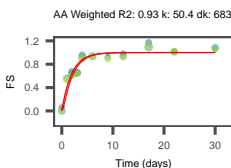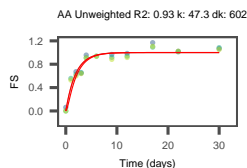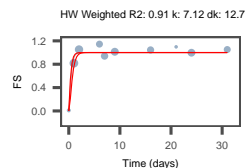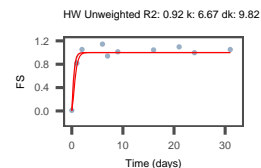

CP2F2

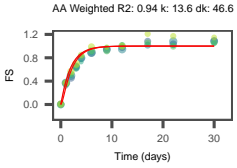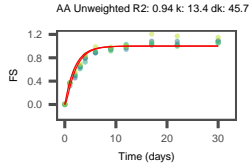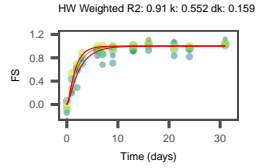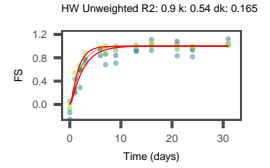

CP2J5

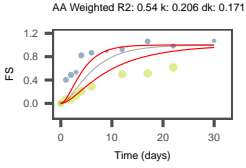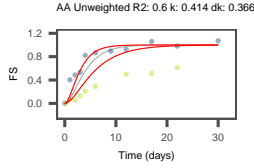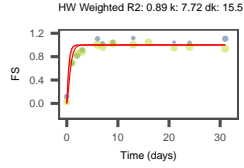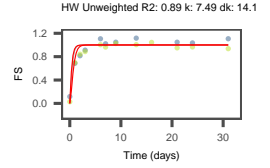

CP3AB

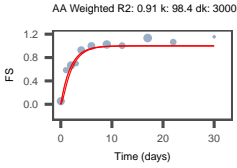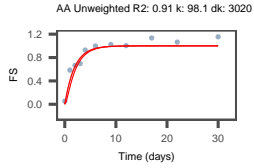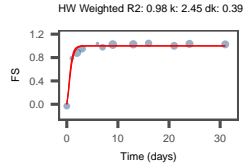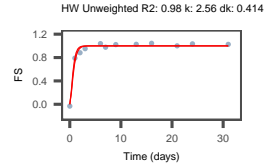

CP3AD

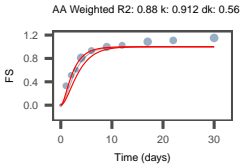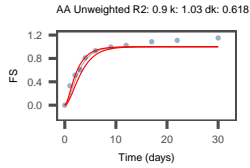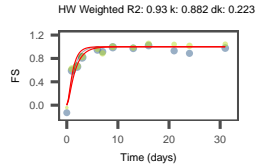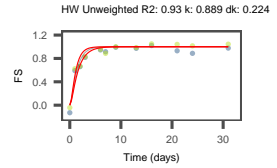

CP7B1

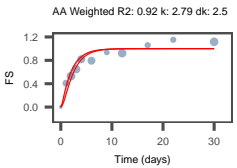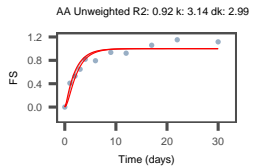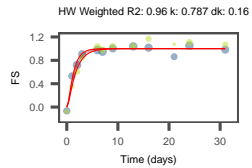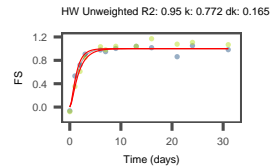

CPSM

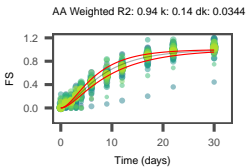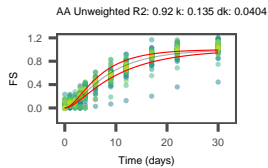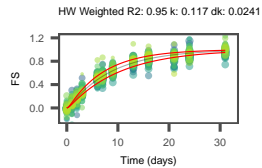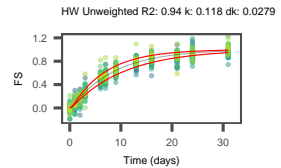

## CPT1A

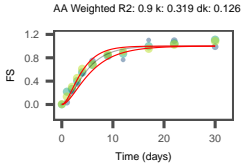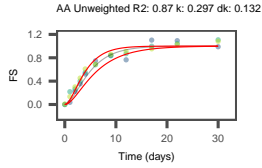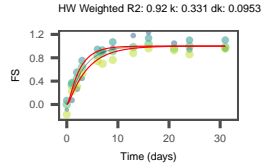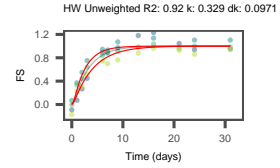

## CPT2

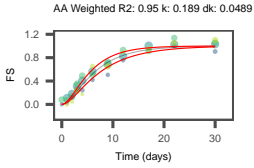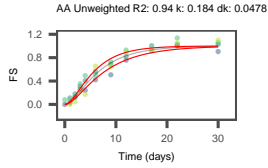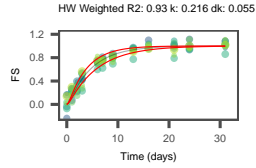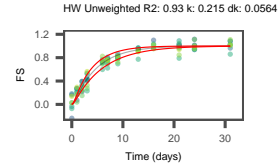

## CSAD

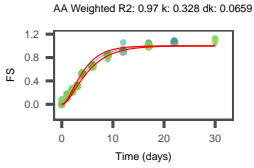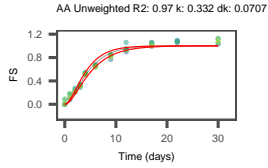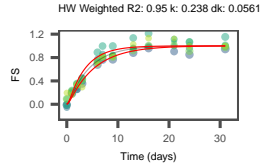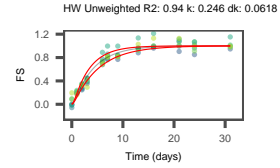

## CSN2

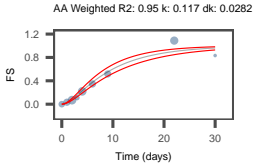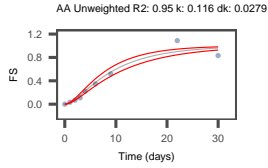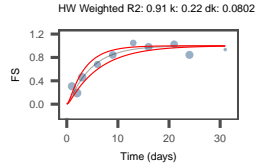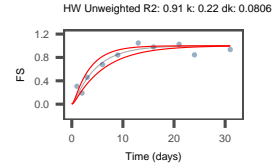

## CSN4

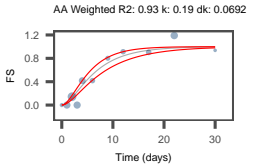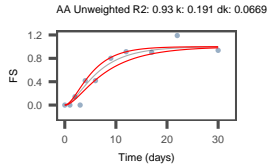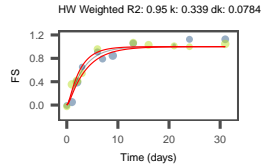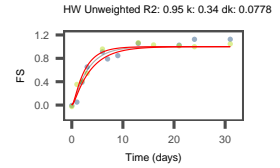

## CSRPI

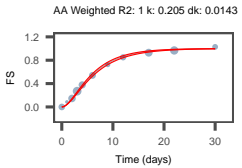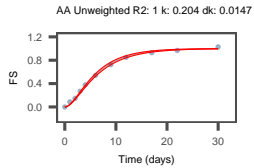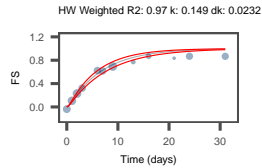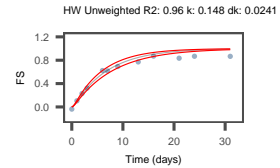

## CTNA1

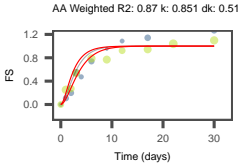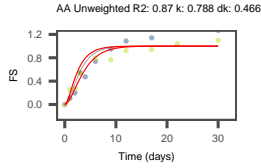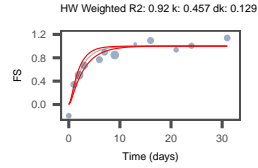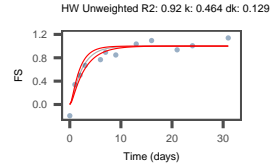

## CTND1

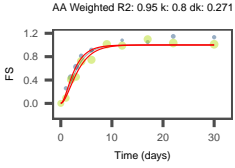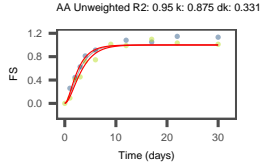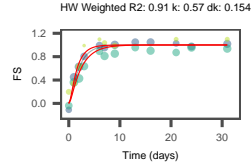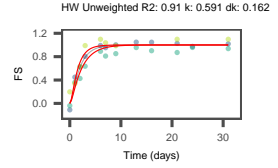

## CX6A1

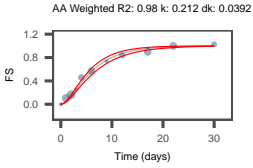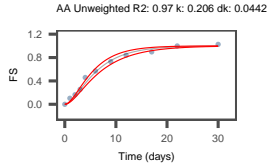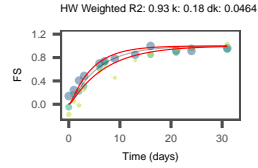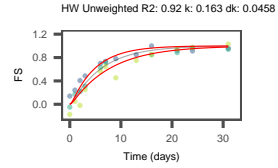

## CY1

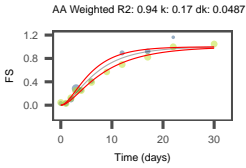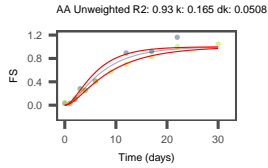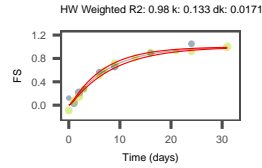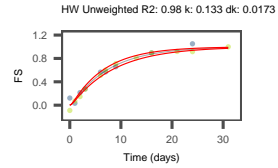

## CYB5

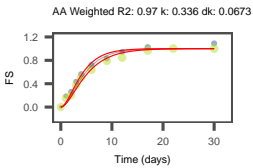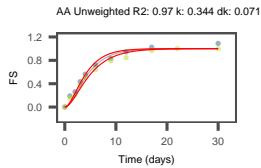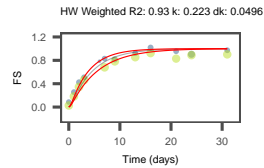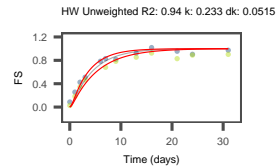

## CYC

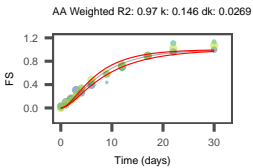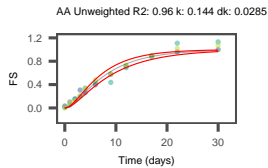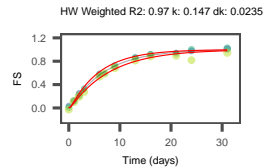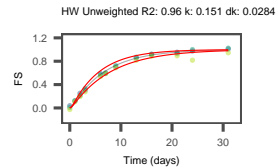

## DCXR

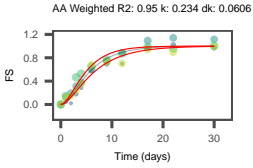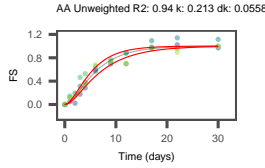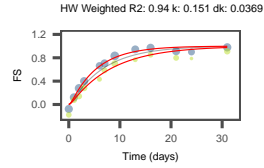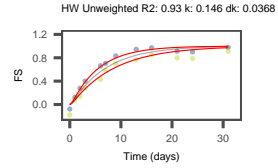

## DDAH1

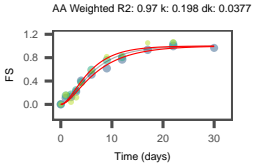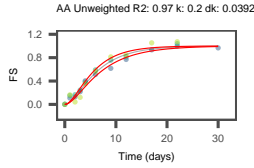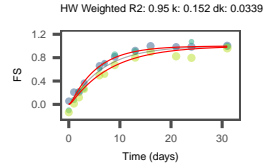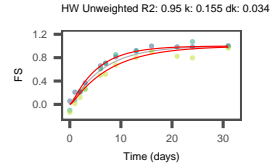

## DDB1

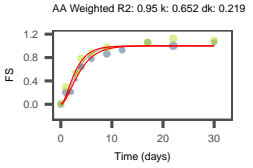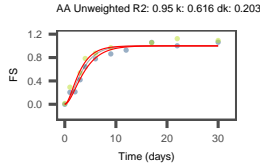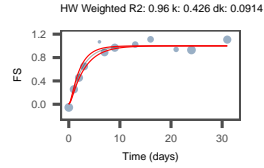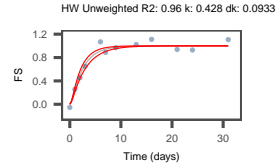

## DDC

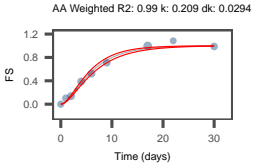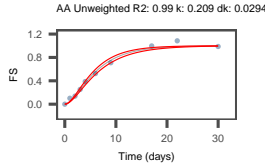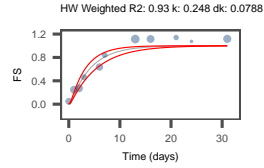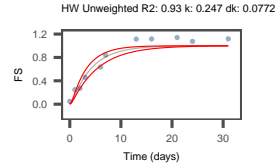

## DDX1

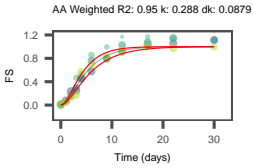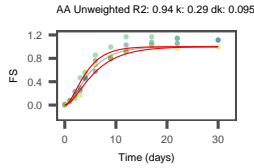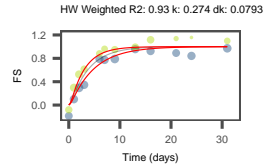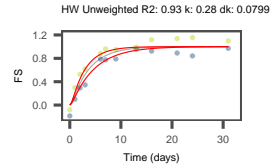

## DECR

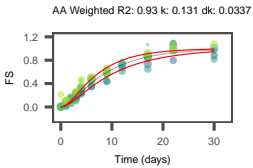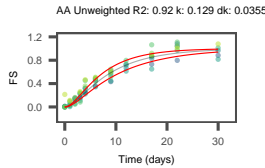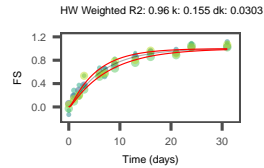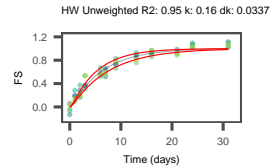

## DECR2

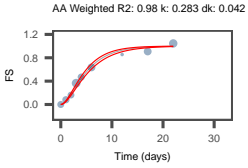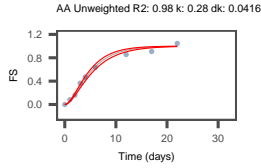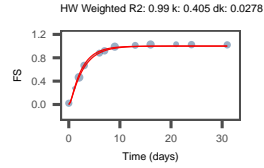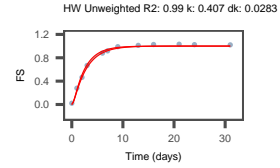

## DEST

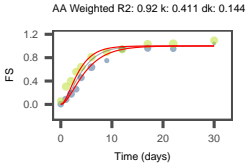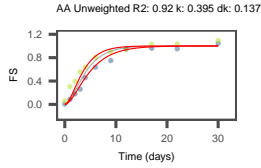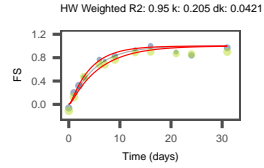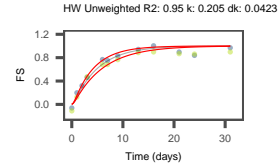

## DHB12

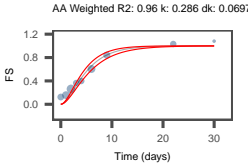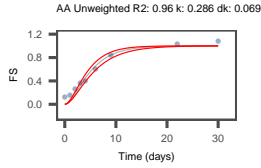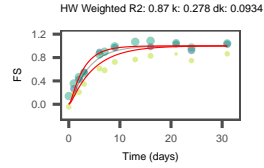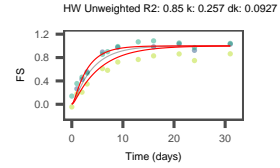

## DHB13

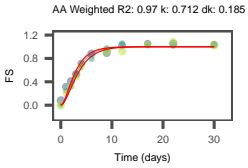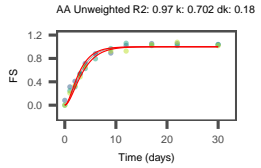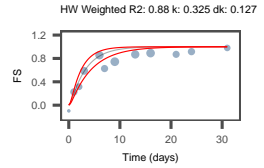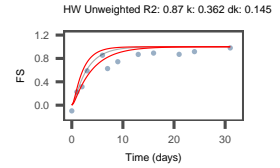

## DHB4

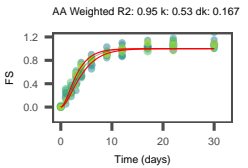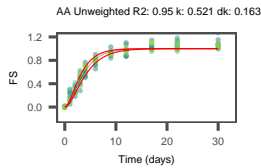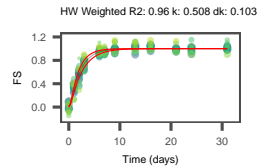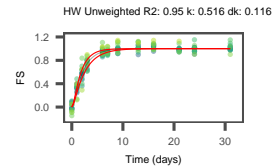

## DHB5

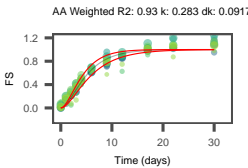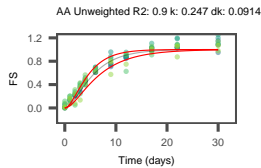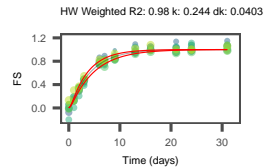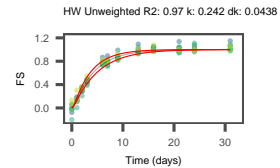

DHCR7

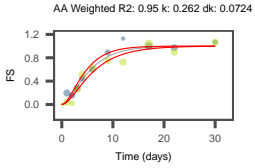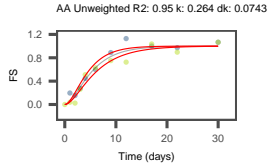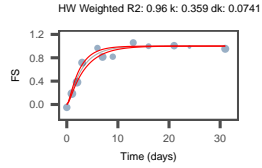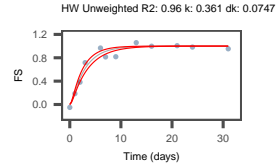

DHDH

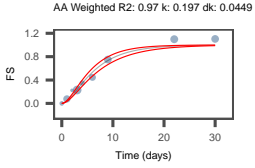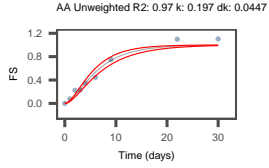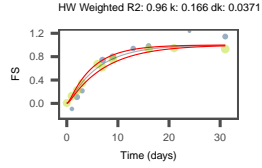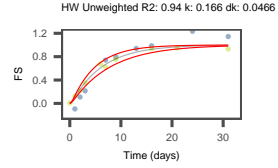

DHE3

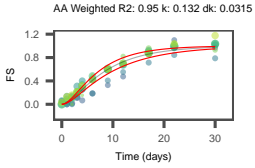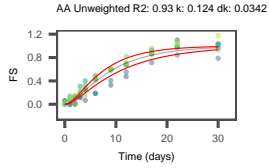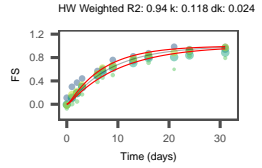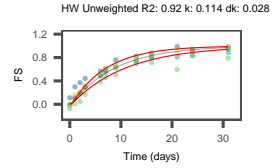

DHI1

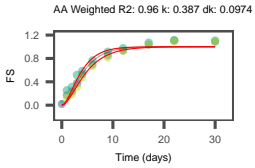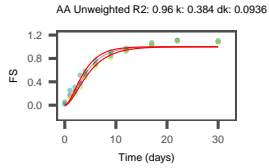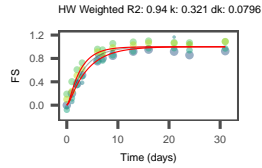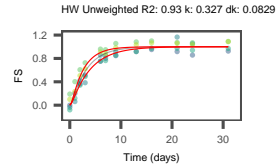

DHPR

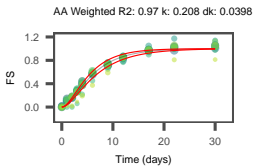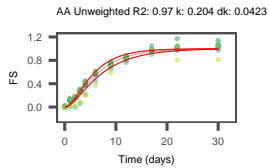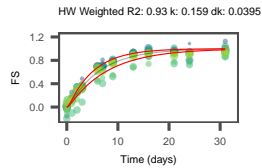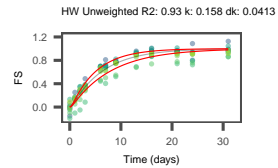

DHRS1

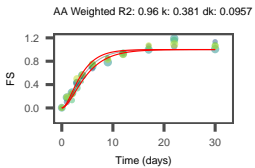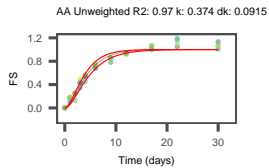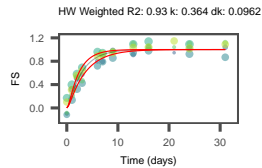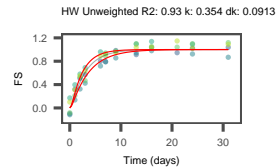

## DHRS4

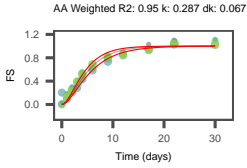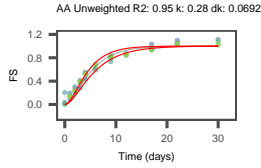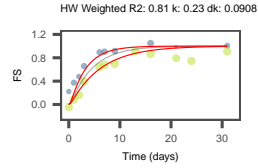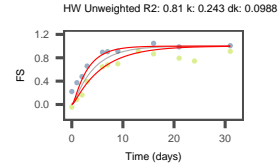

## DHHSO

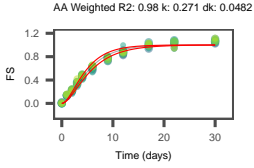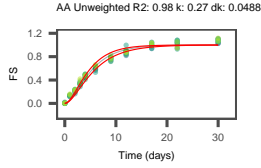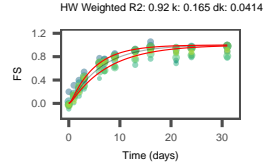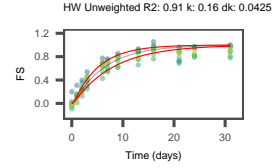

## DHTK1

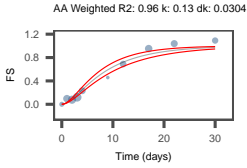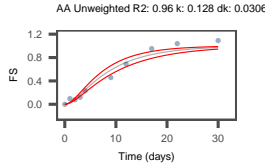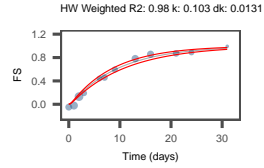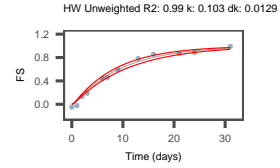

## DHX9

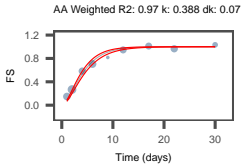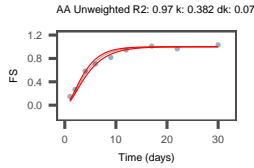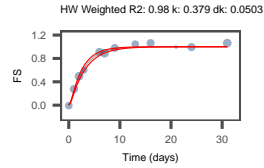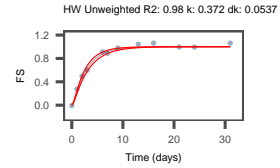

## DIC

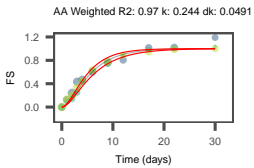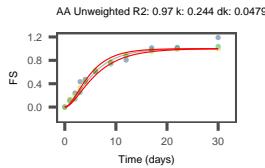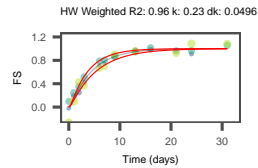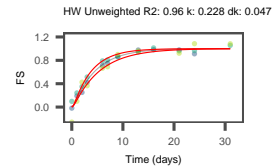

## DLDH

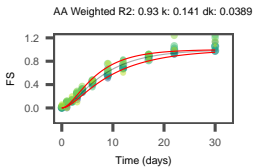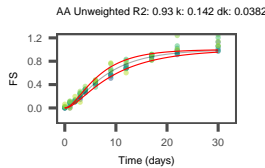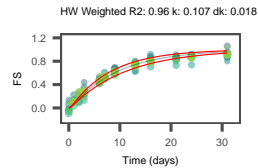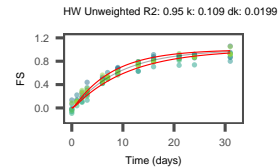



DNJA3

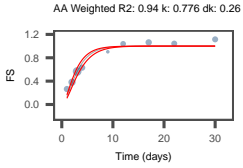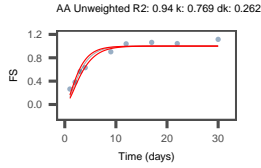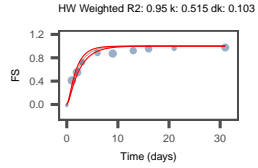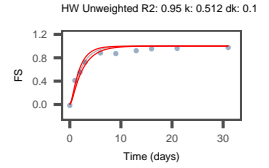

DOPD

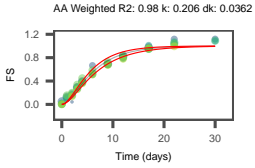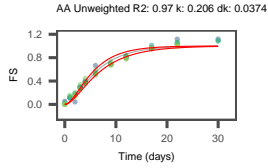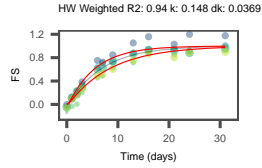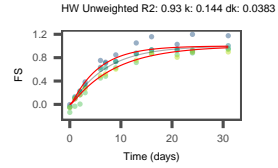

DPP4

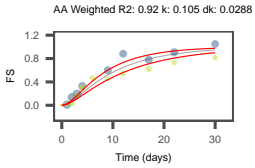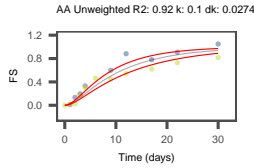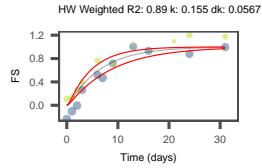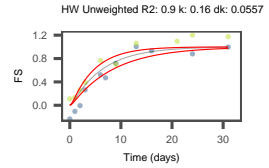

DPYD

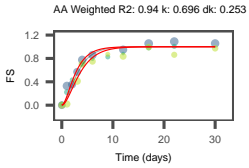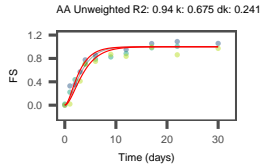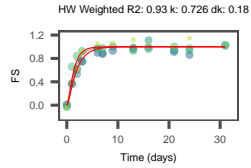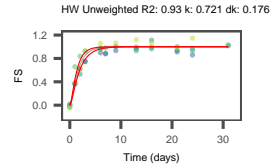

DPYS

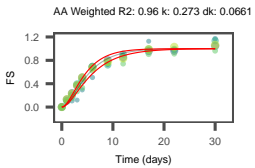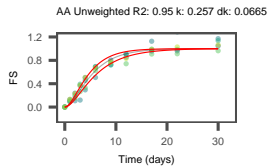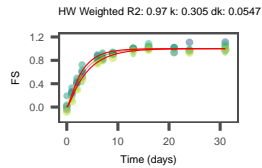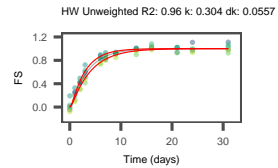

DYHC1

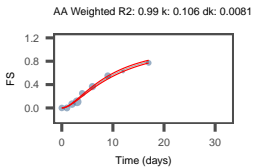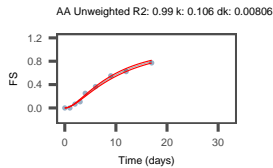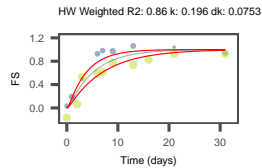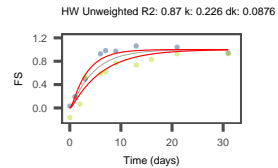

EBP

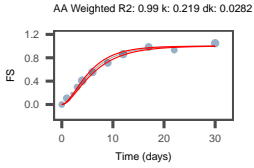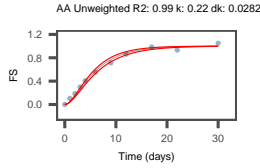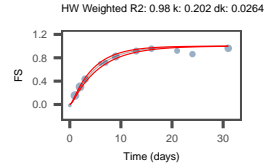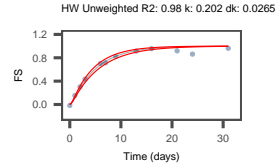

ECH1

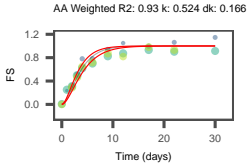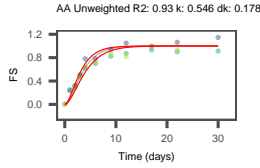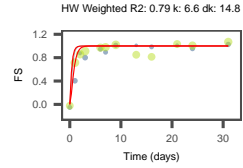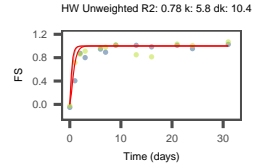

ECHA

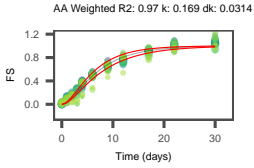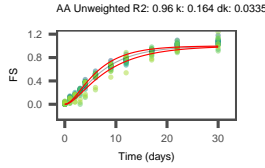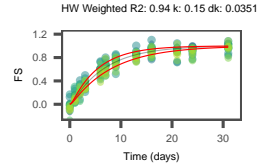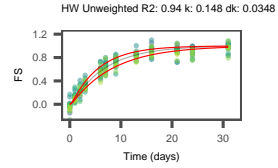

ECHB

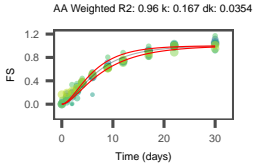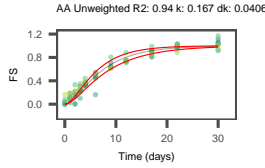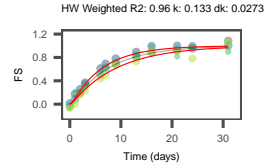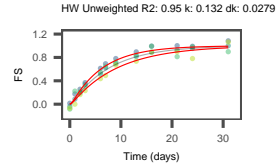

ECHD3

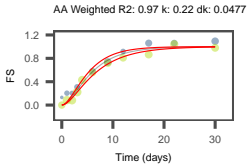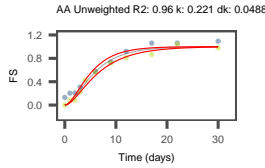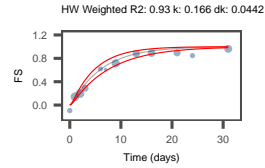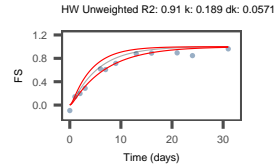

ECHM

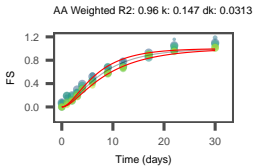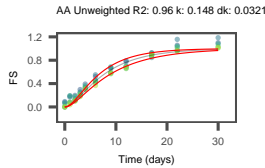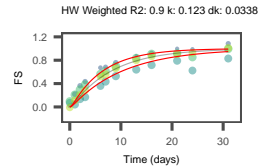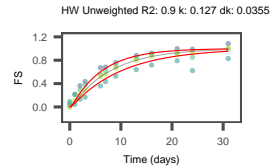

ECHP

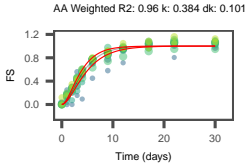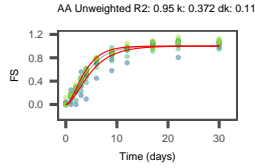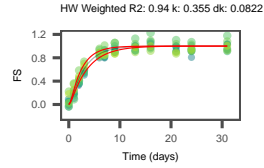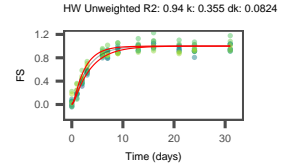

ECI1

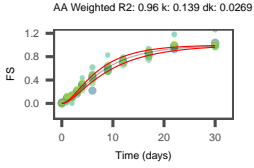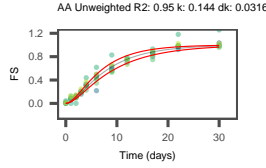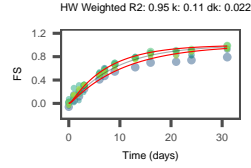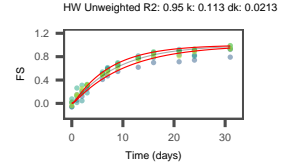

ECI2

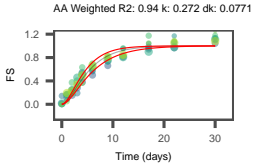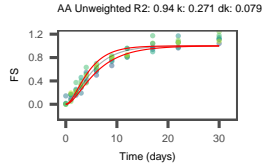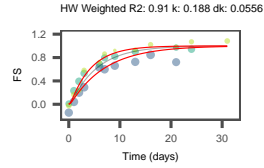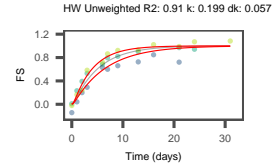

EF1A1

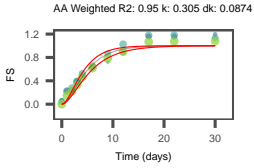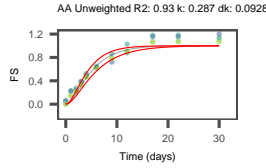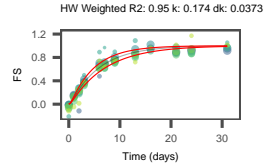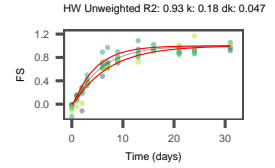

EF1B

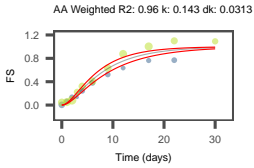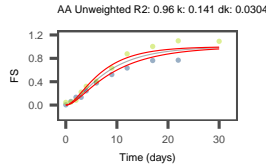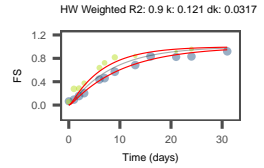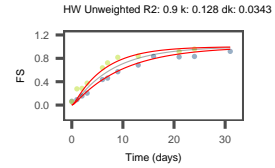

EF1D

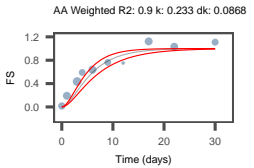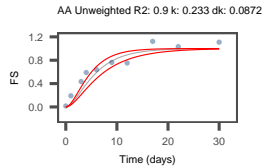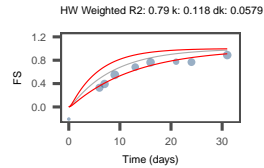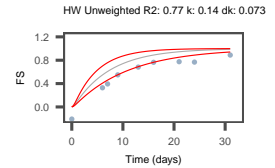

## EF1G

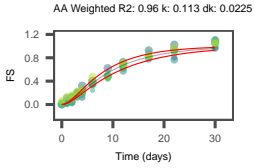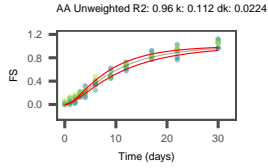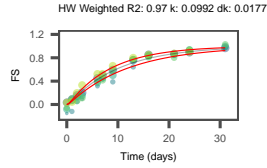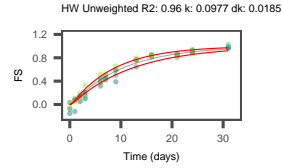

## EF2

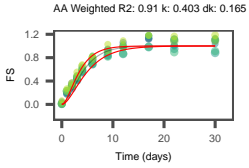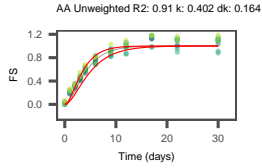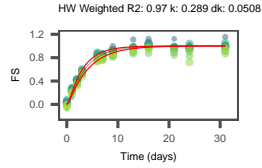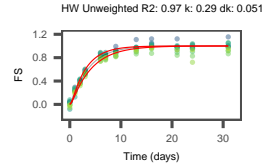

## EFTU

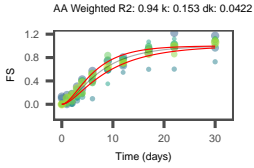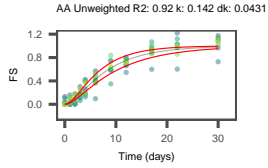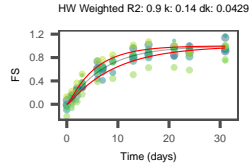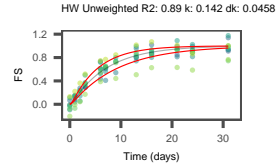

## EGFR

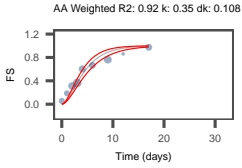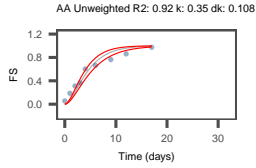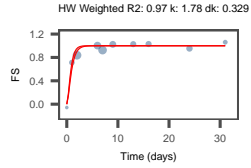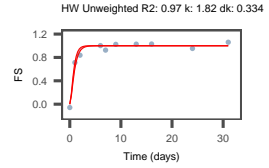

## EIF3E

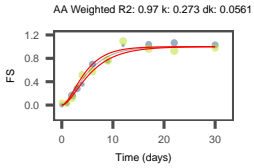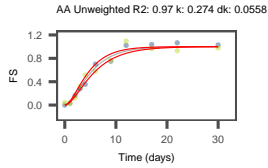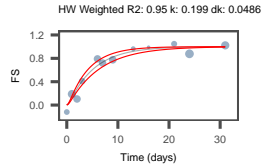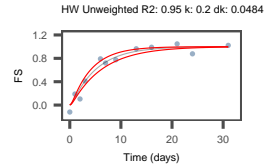

## EIF3F

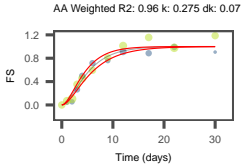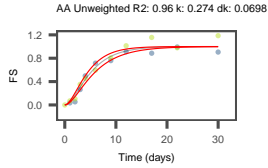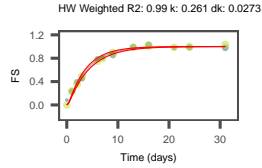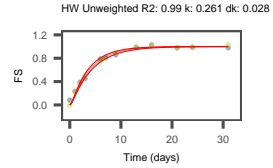

## EIF3H

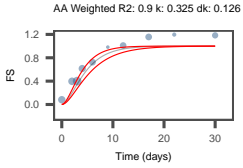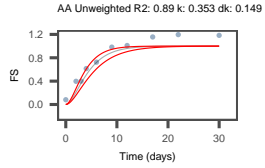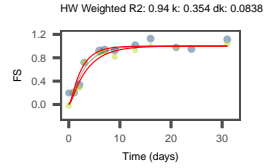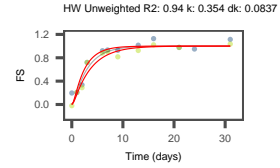

## EIF3L

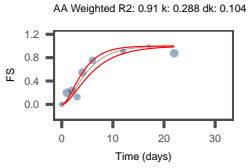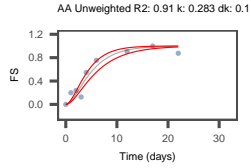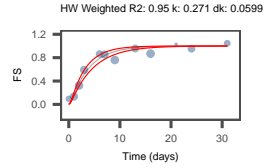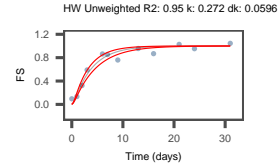

## ENO4

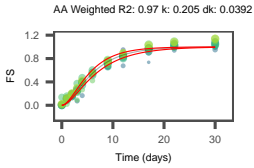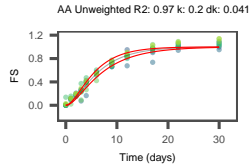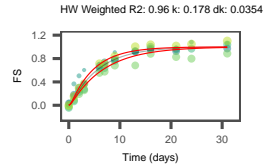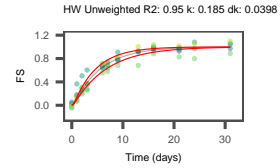

## ENPL

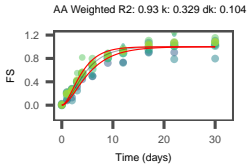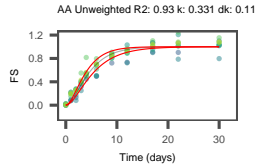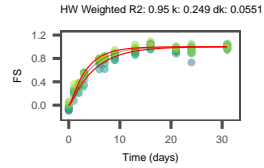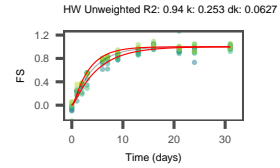

## ENTP5

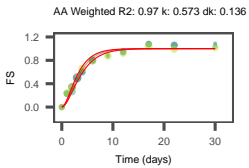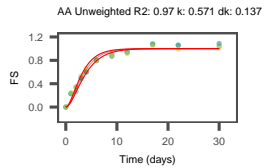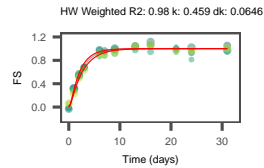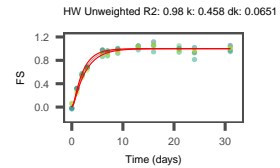

## ERAP1

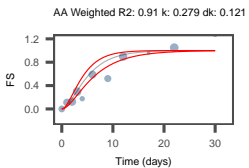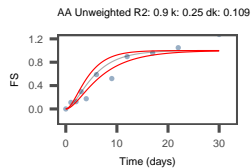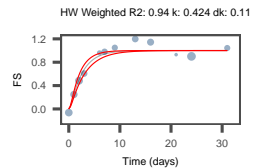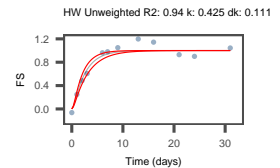

## EST1

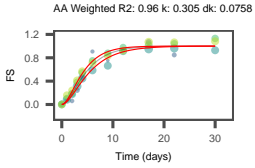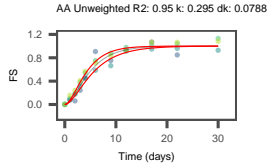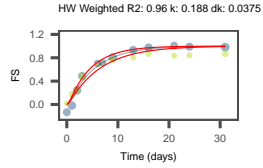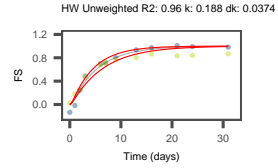

## EST1D

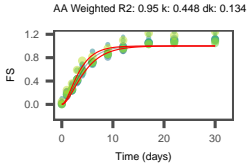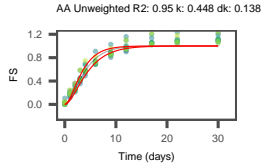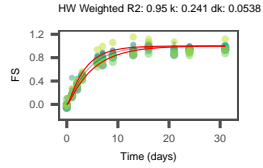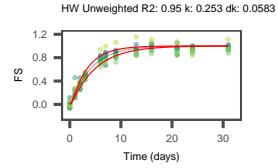

## EST1F

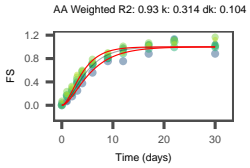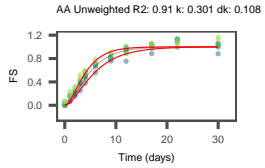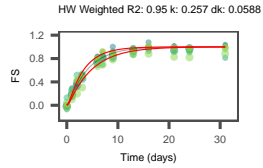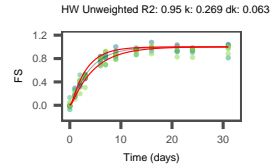

## EST2A

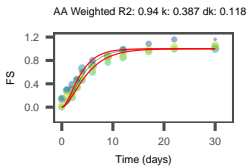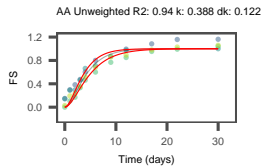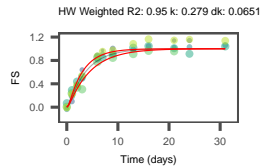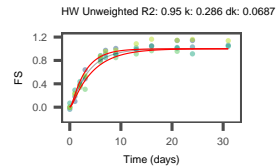

## EST2C

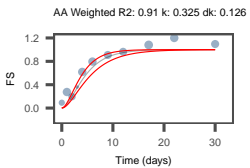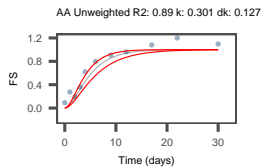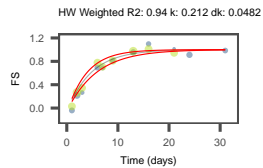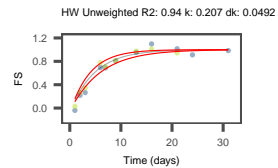

## EST2E

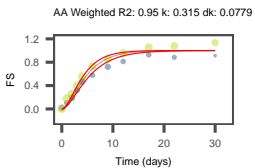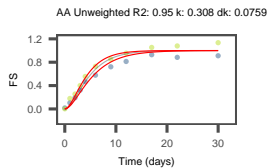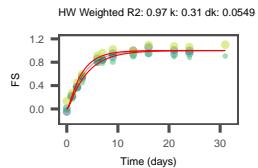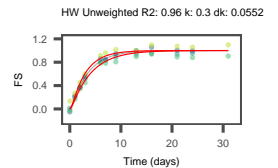

## EST3A

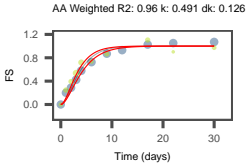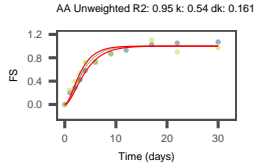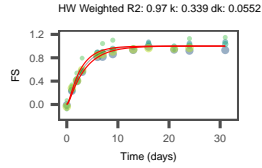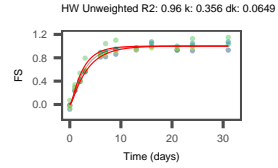

## EST3B

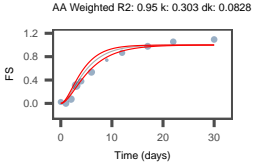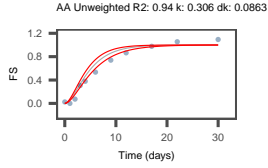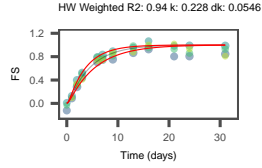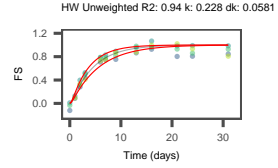

## ESTD

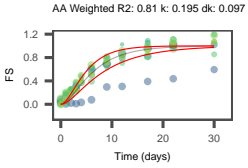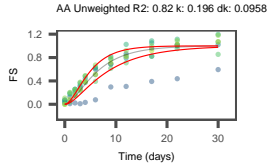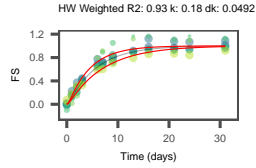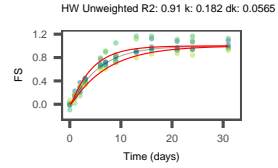

## ETFA

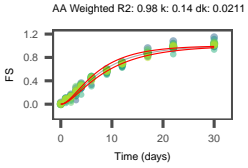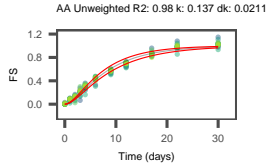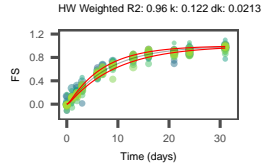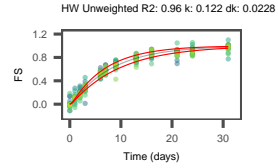

## ETFB

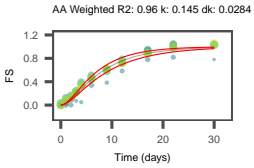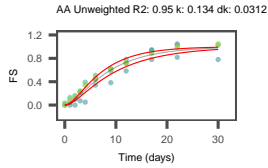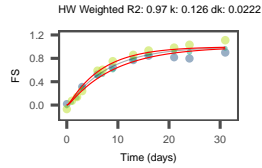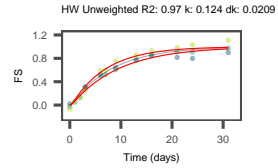

## ETFD

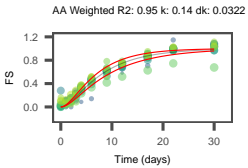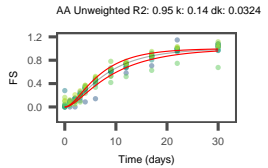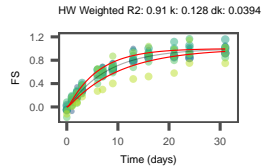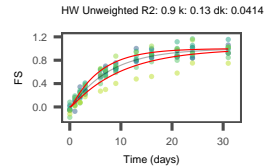

ETHE1

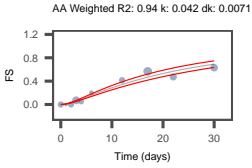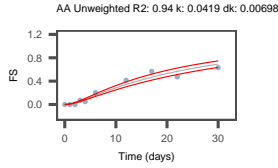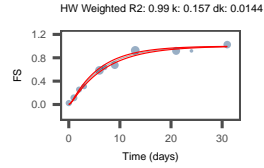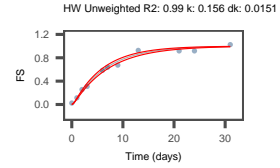

F16P1

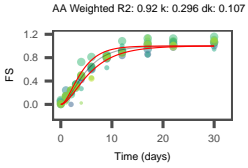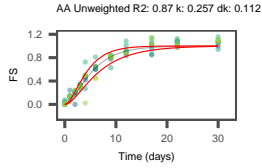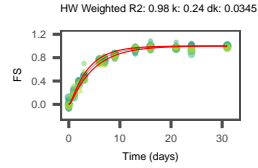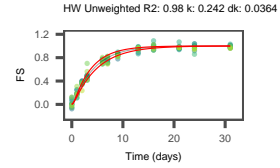

FAAA

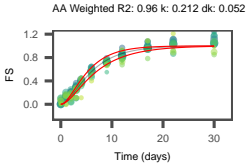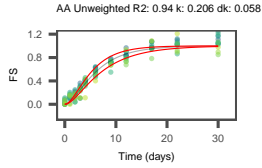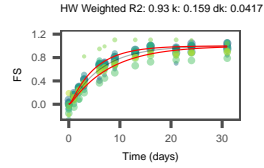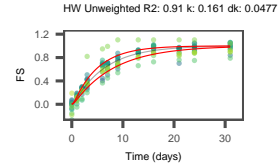

FAAH1

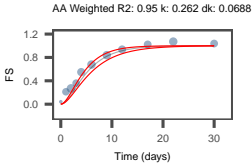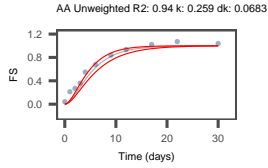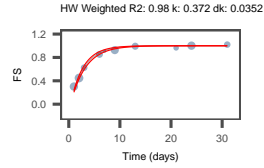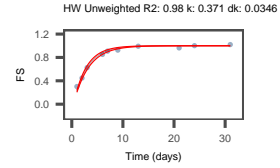

FABPI

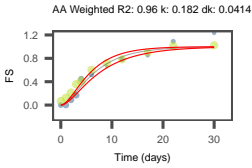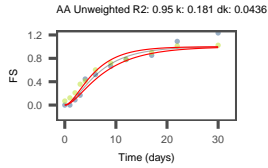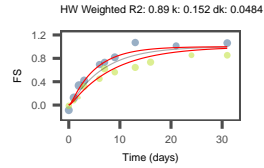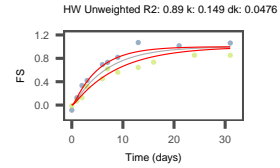

FABPL

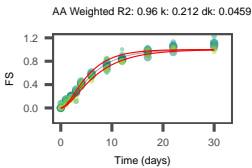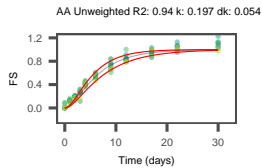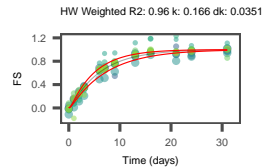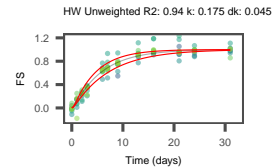



## FAHD1

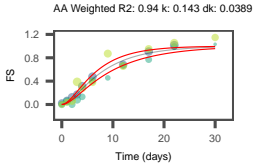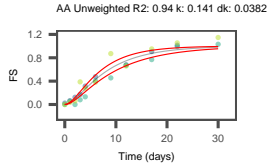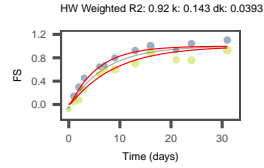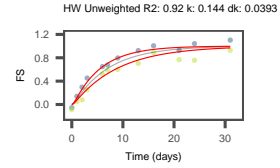

## FAS

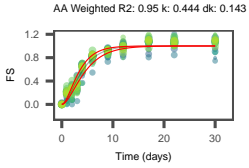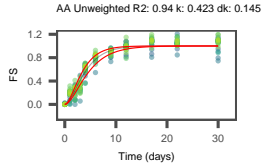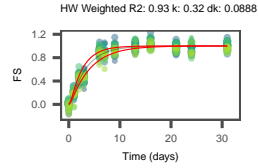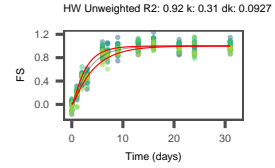

## FGGY

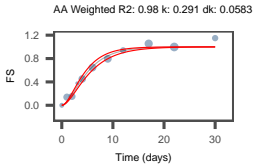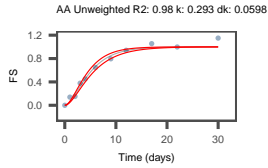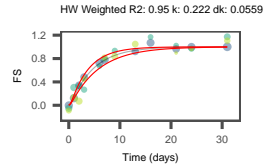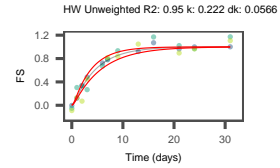

## FIBB

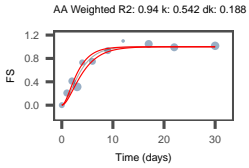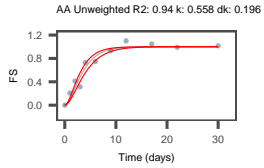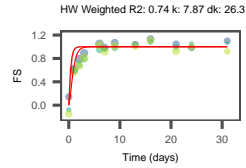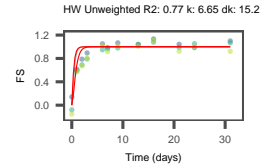

## FIS1

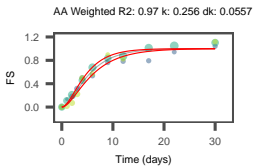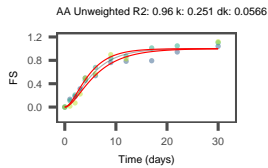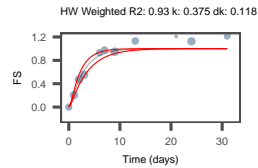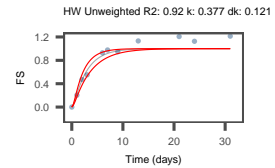

## FKBP2

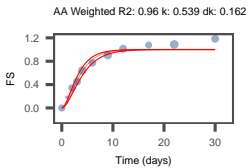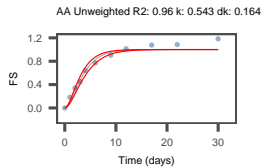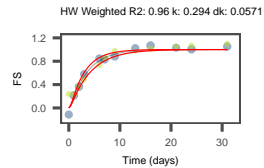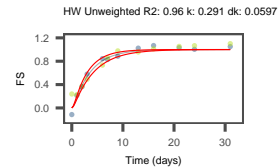

FLNB

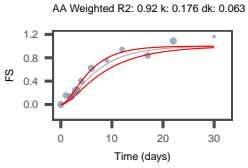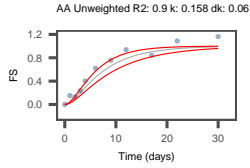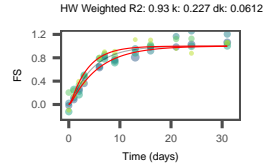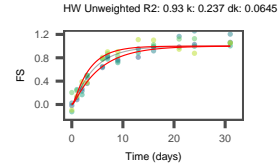

FMO1

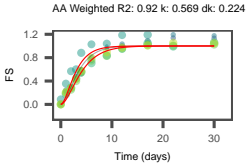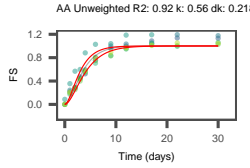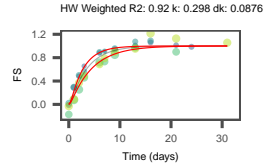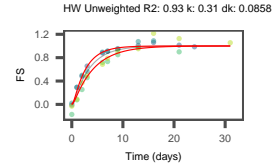

FMO5

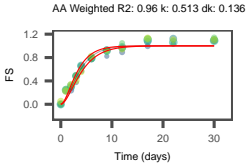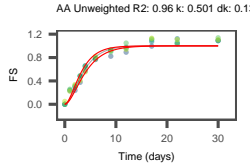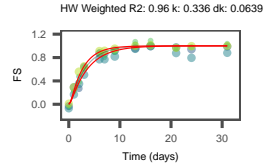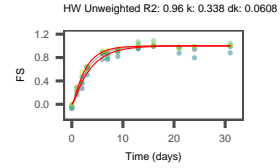

FPFS

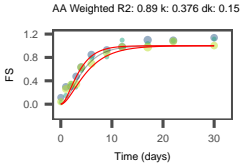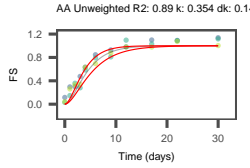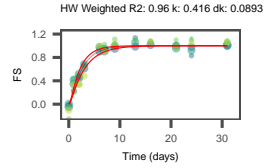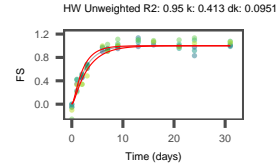

FTCD

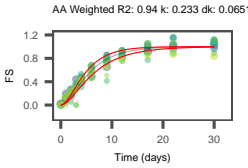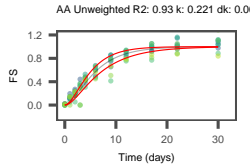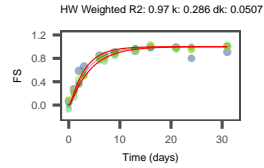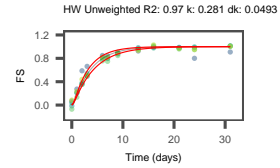

FUMH

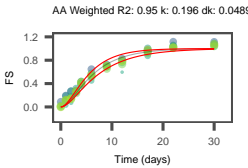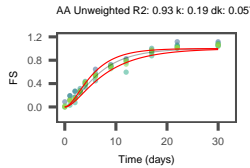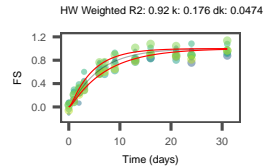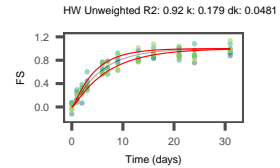

## FUS

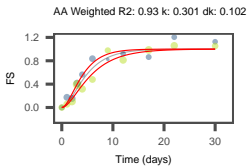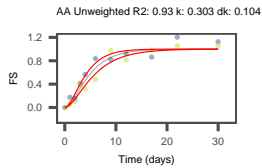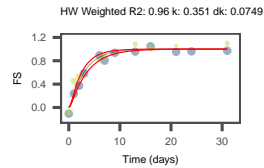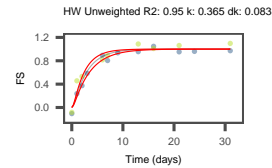

## G3P

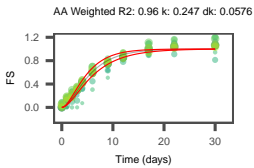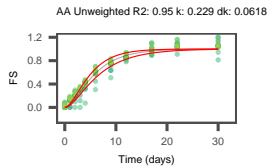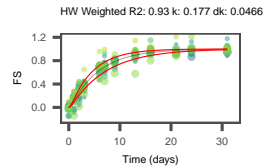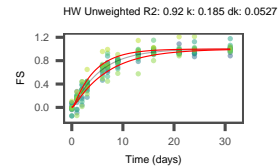

## G6PC1

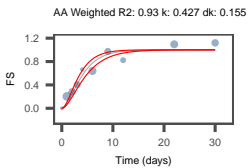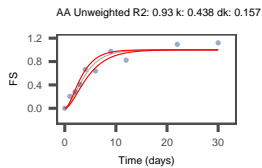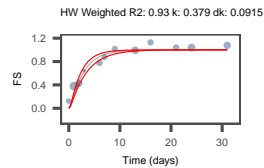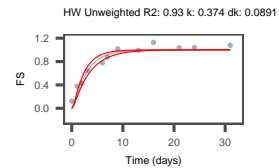

## G6PE

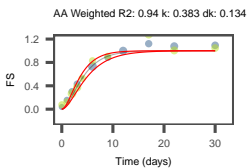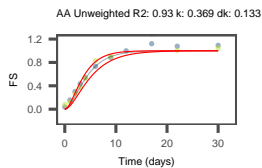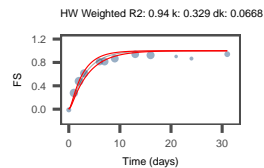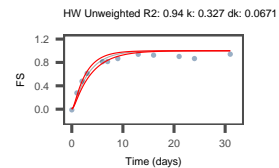

## G6PI

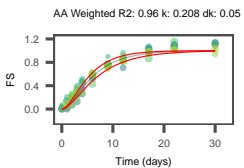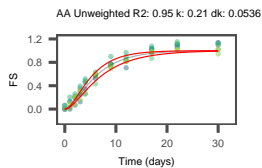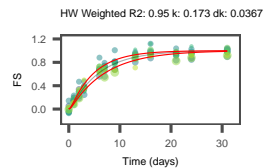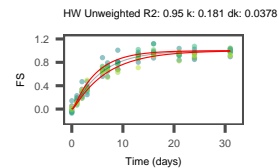

## GABT

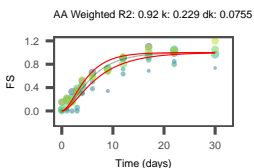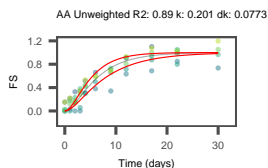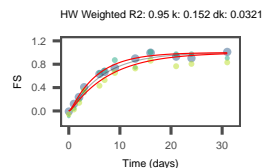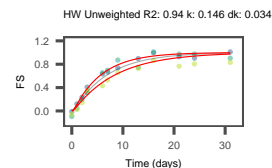

## GAL3A

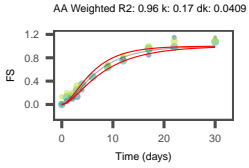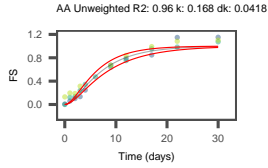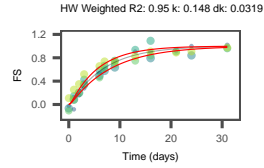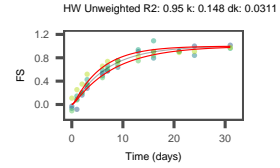

## GALK1

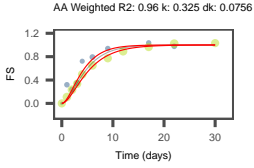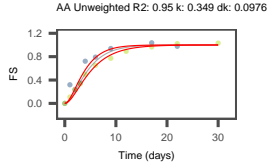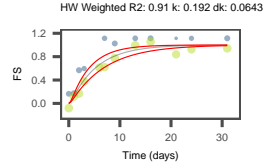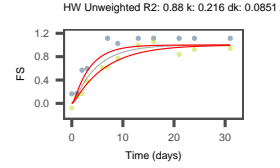

## GALM

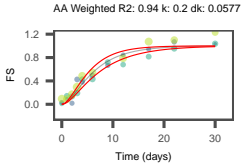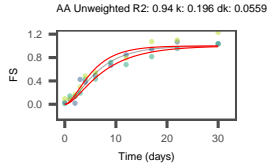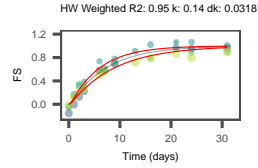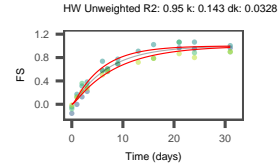

## GAMT

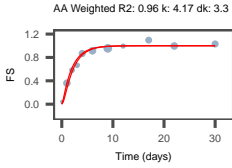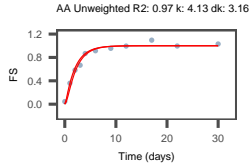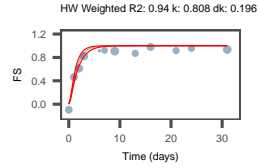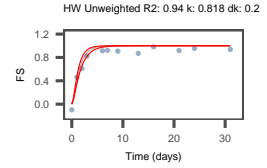

## GANAB

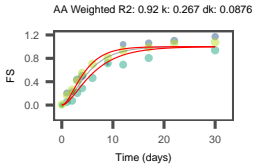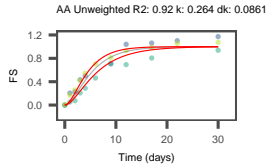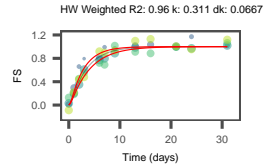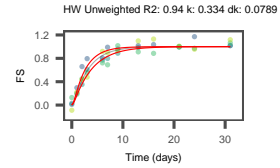

## GBB2

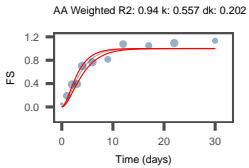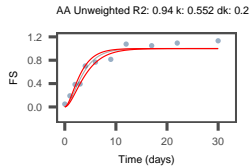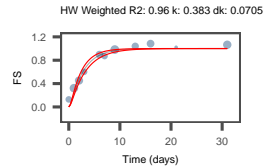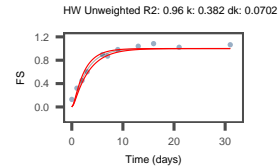

## GCDH

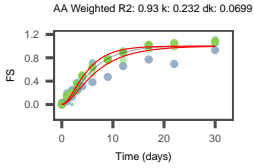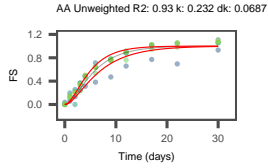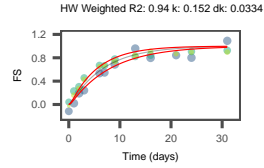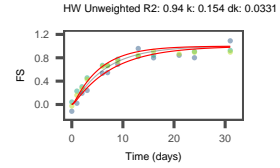

## GCKR

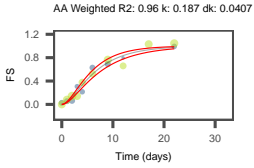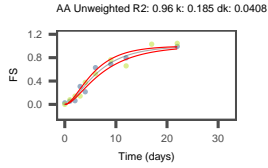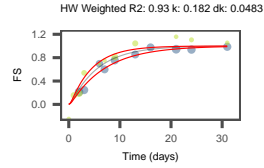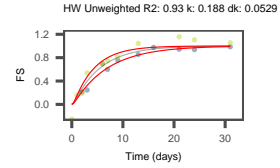

## GCSH

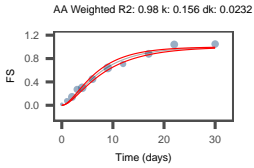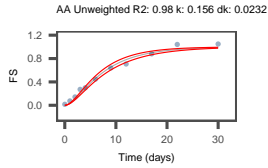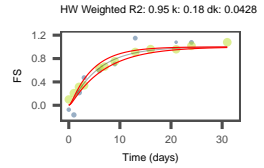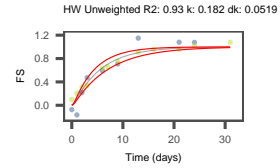

## GCSF

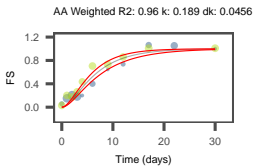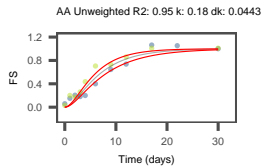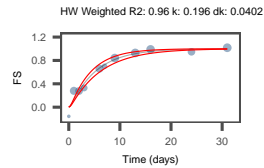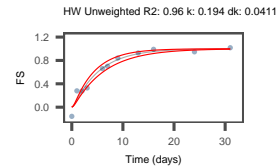

## GDIA

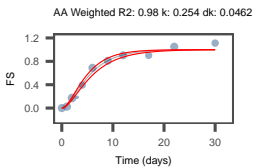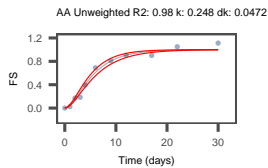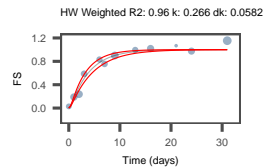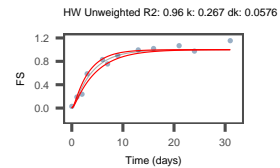

## GDIB

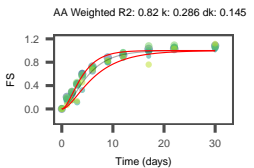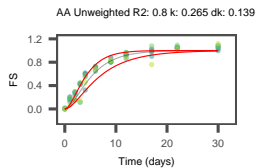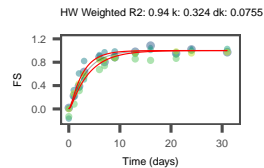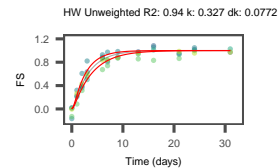

## GFRP

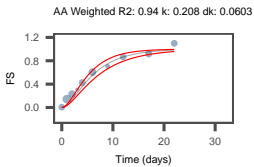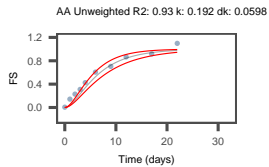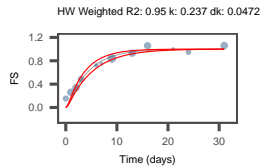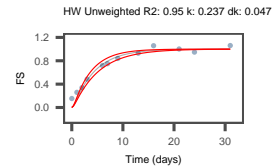

## GGLO

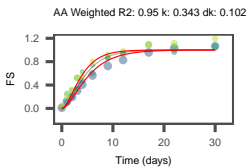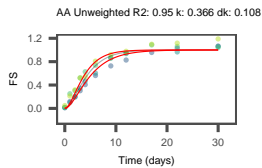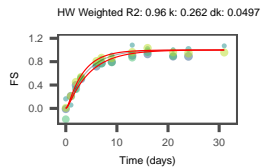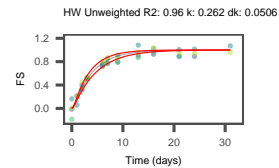

## GLCTK

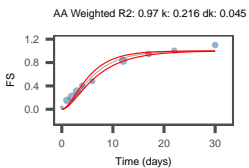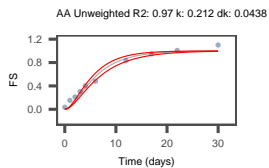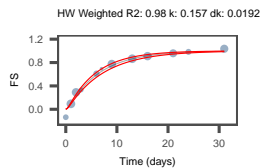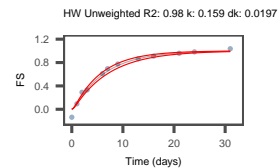

## GLGB

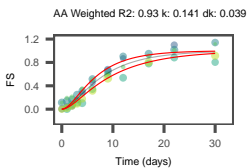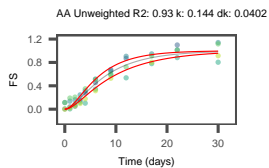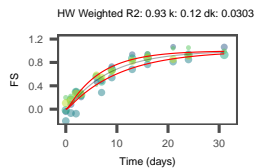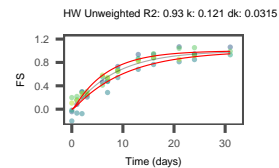

## GLNA

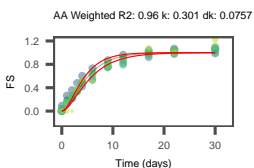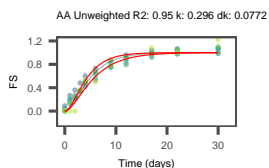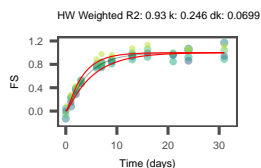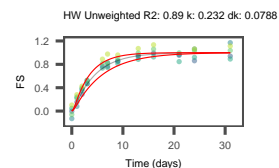

## GLO2

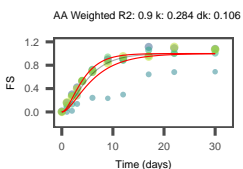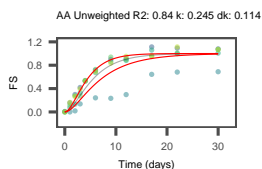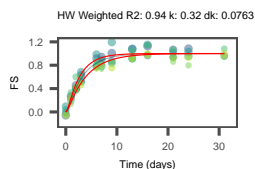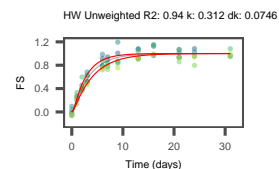

## GLOD4

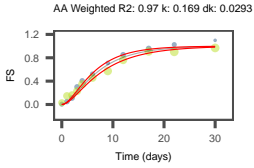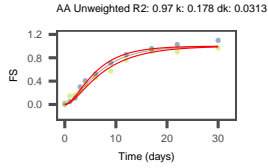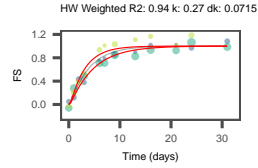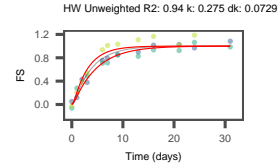

## GLPK

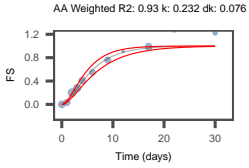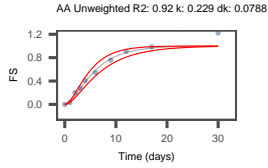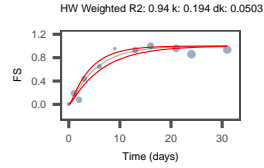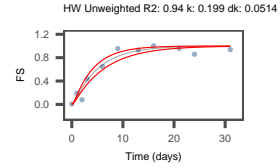

## GLSL

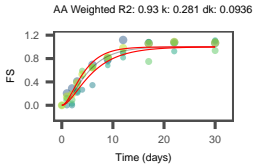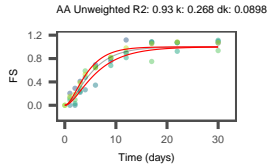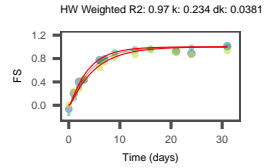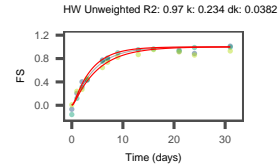

## GLU2B

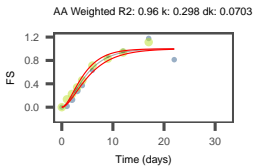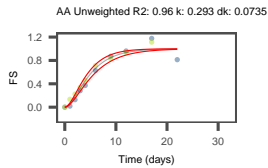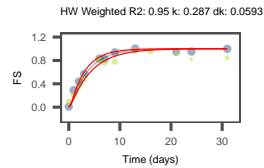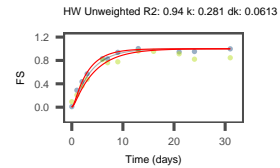

## GLUCM

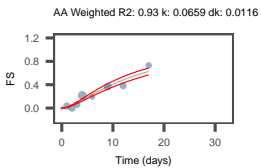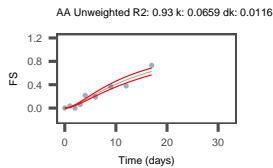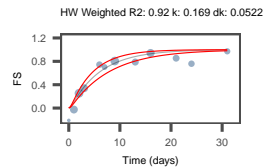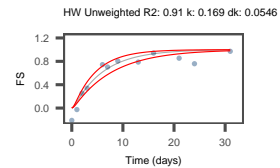

## GLYL

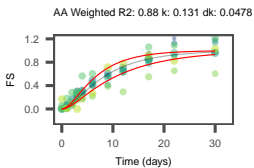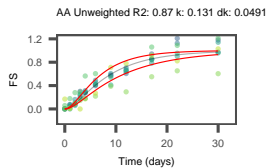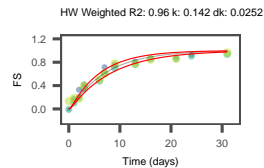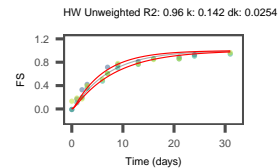

## GLYAT

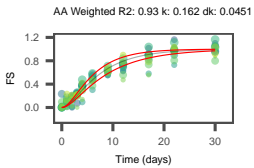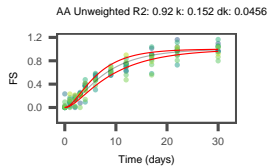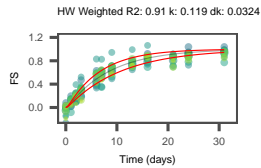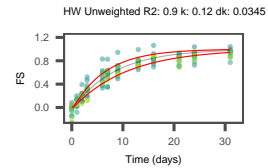

## GLYC

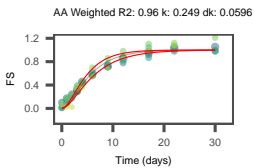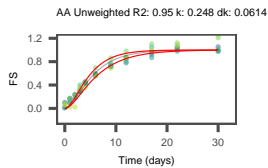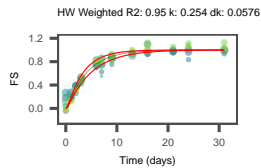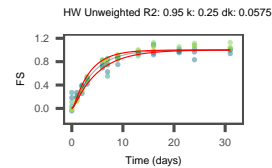

## GLYM

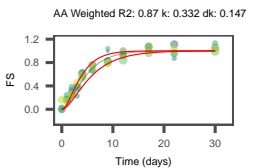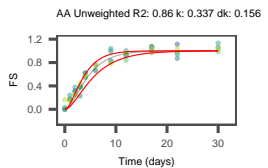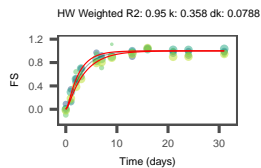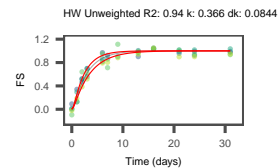

## GNMT

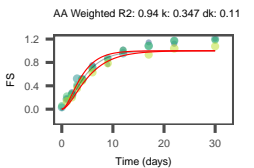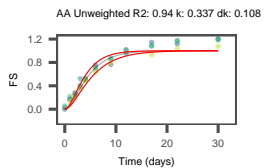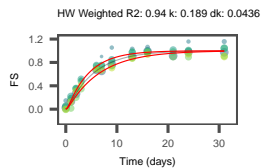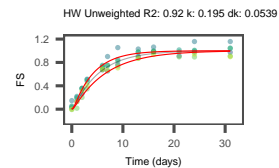

## GPDA

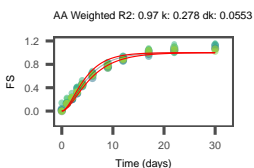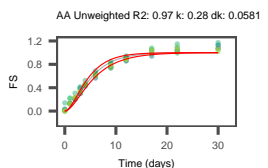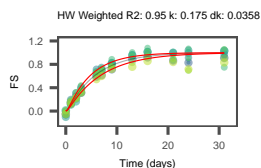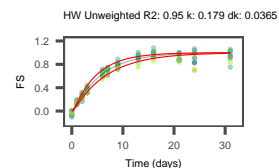

## GPDM

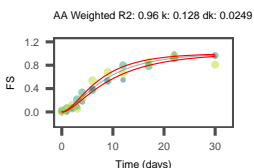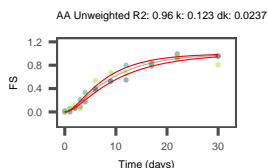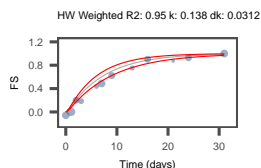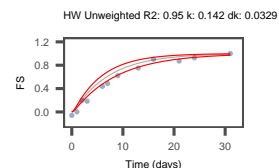





## GSHR

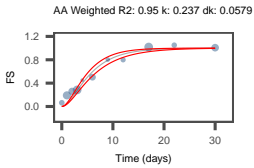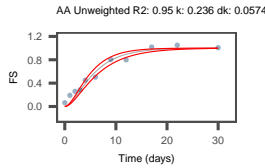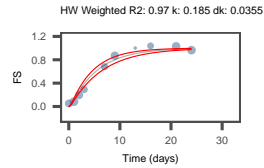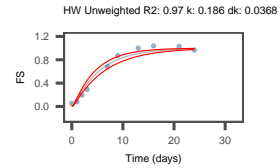

## GSTA3

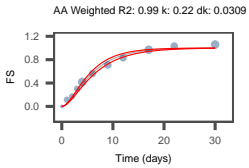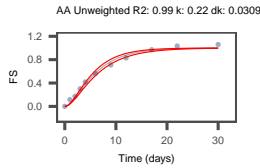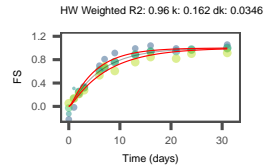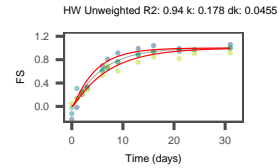

## GSTA4

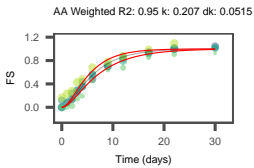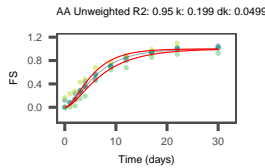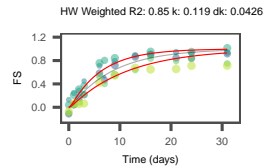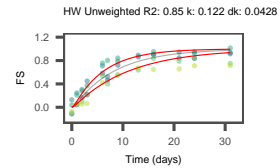

## GSTK1

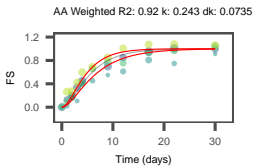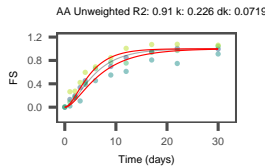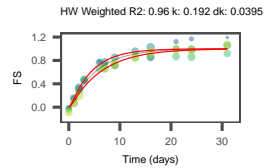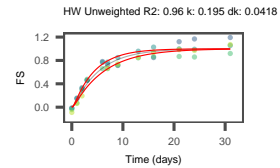

## GSTM1

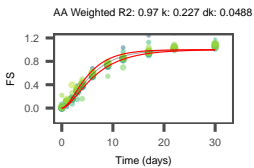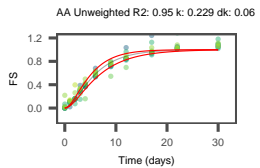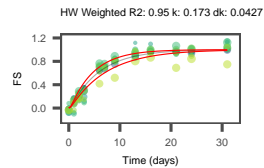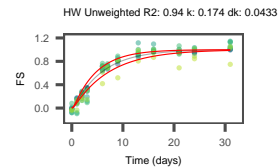

## GSTM2

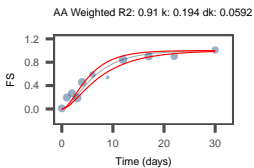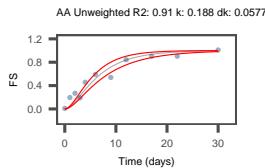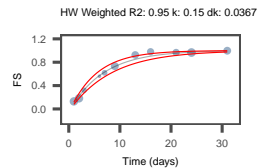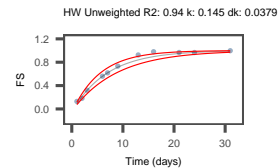

## GSTM3

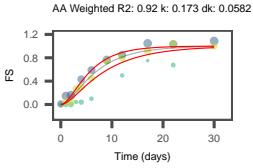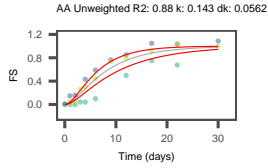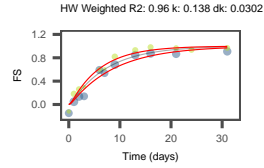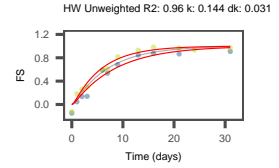

## GSTM6

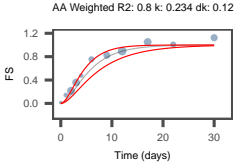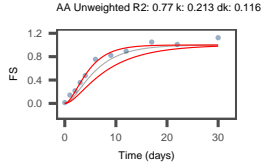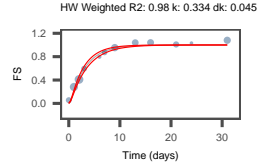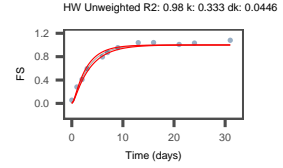

## GSTM7

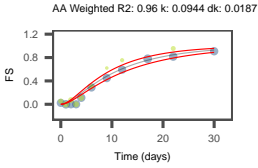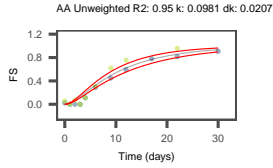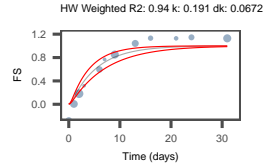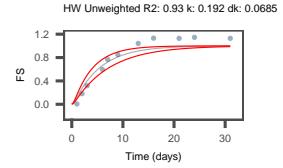

## GSTT2

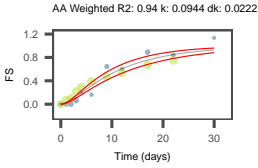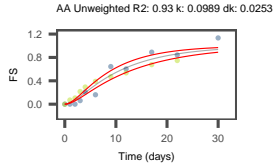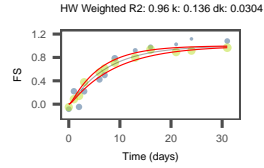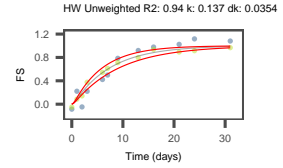

## GYS2

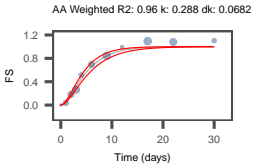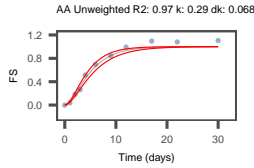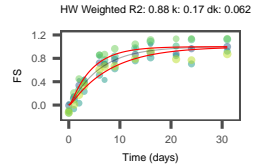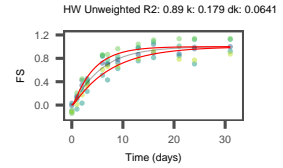

## H14

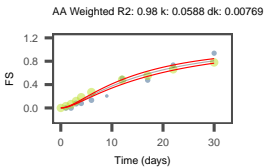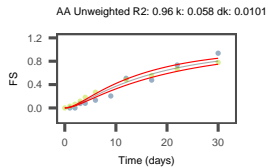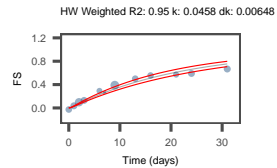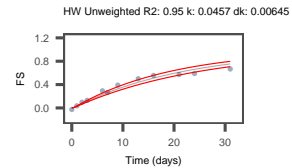

## H2AY

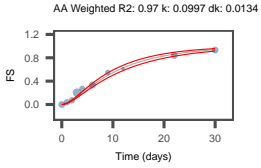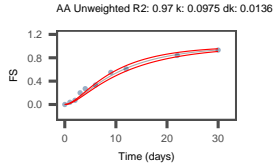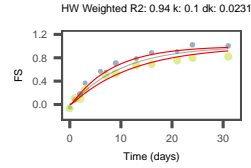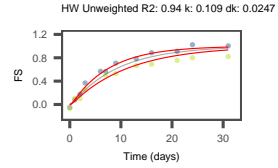

## H4

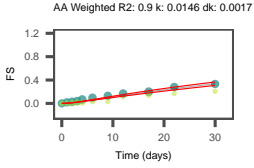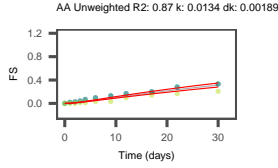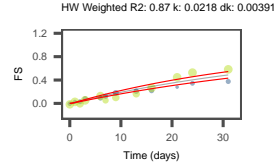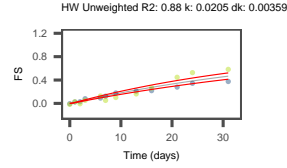

## HACL1

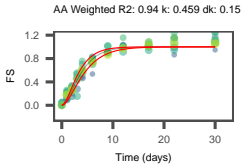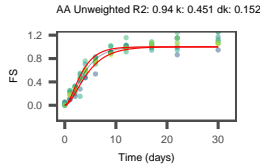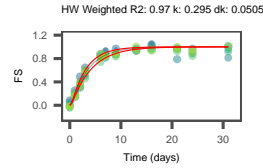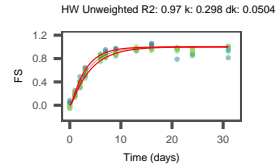

## HBA

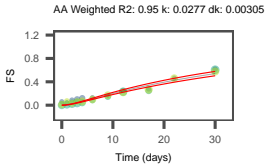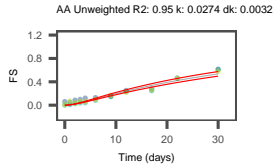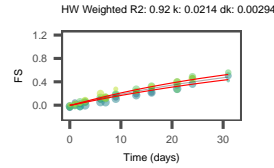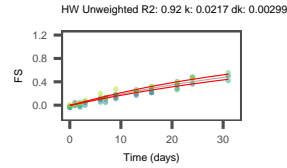

## HBB1

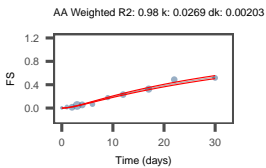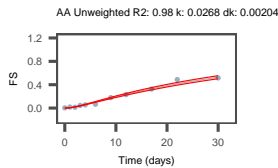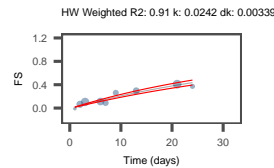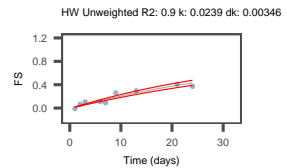

## HCD2

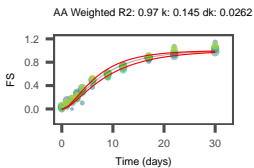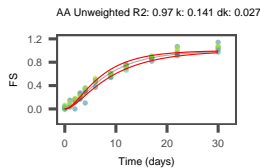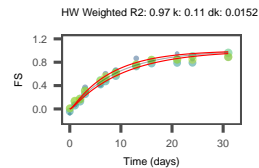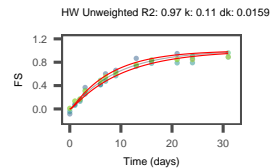

HCDH

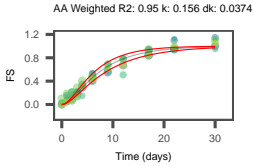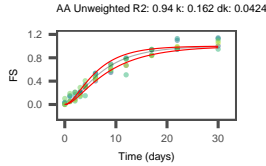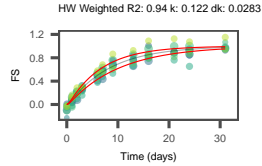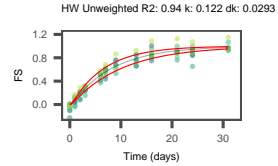

HDHD2

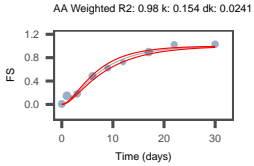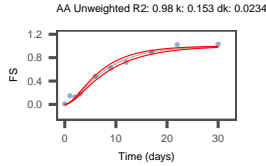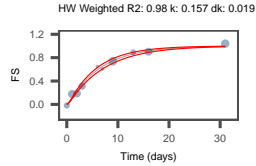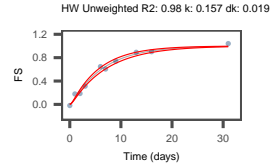

HEBP1

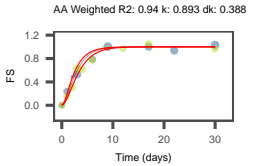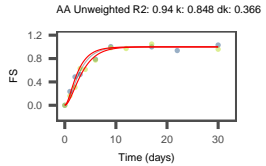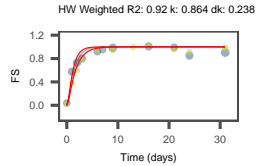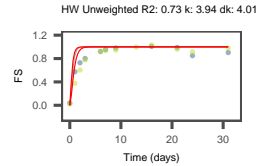

HEM2

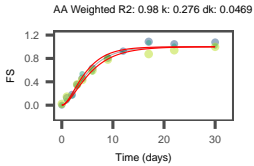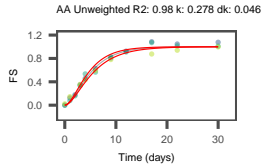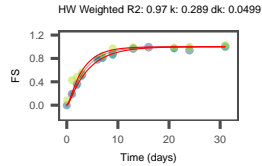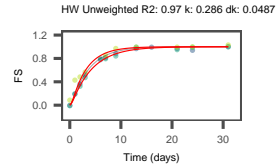

HEM6

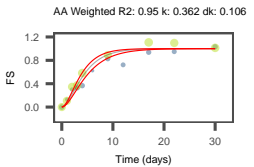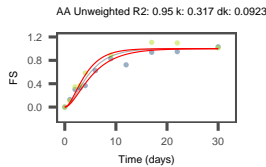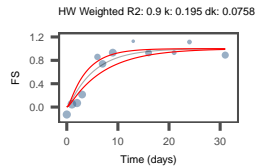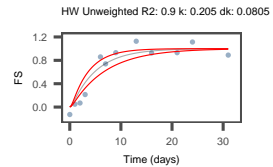

HEMH

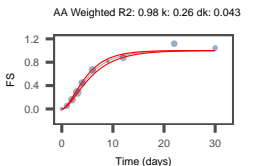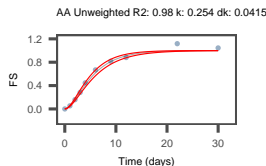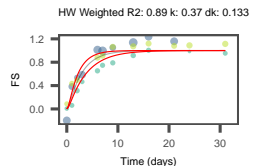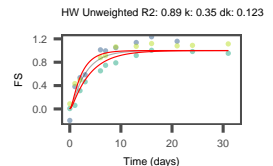

HGD

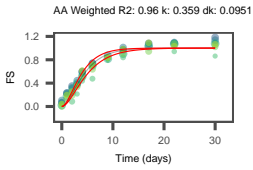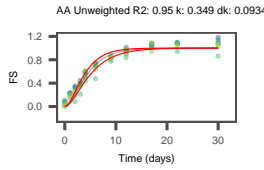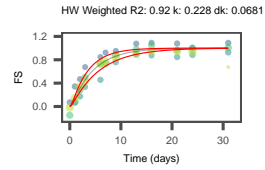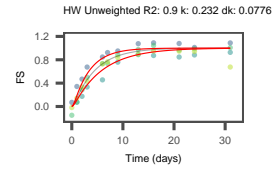

HIBCH

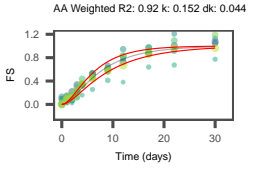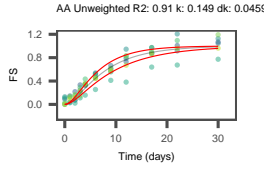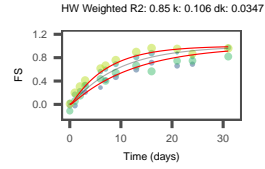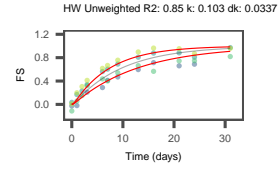

HINT1

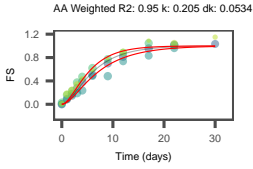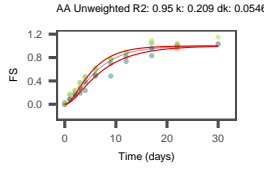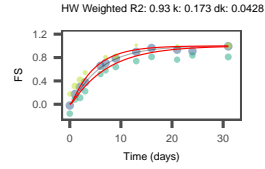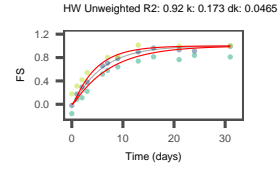

HIUH

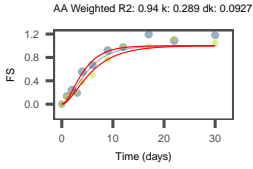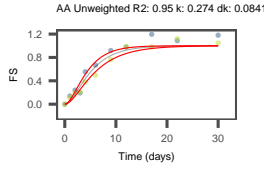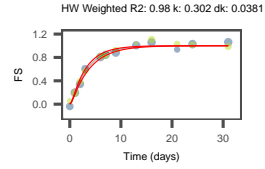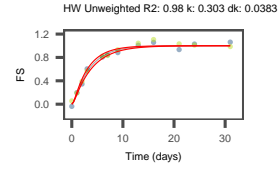

HMCS2

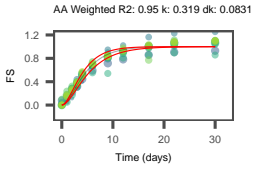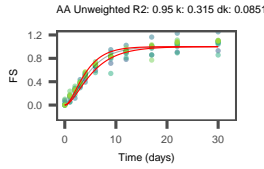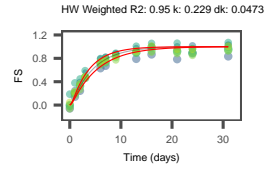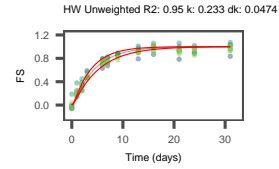

HMGCL

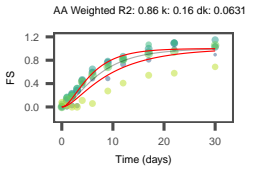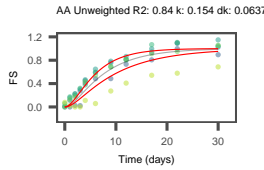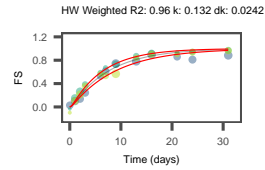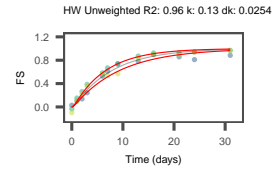

## HNRPK

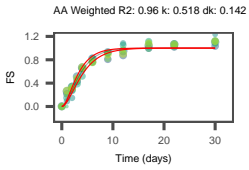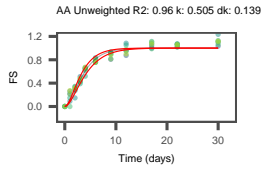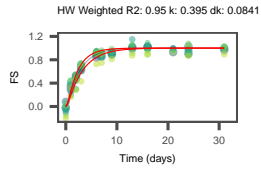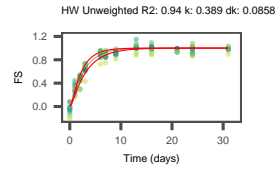

## HNRPL

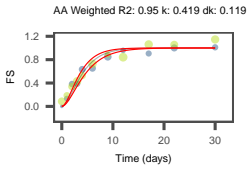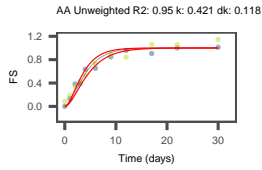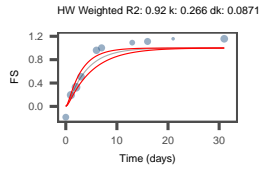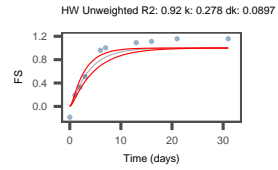

## HNRPM

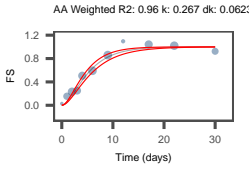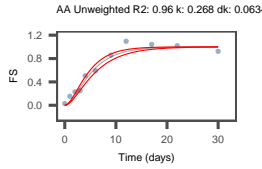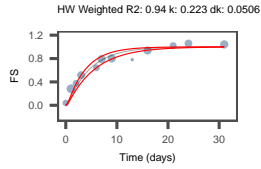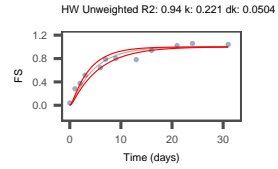

## HNRPQ

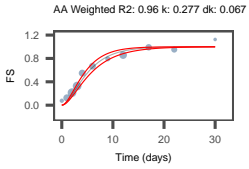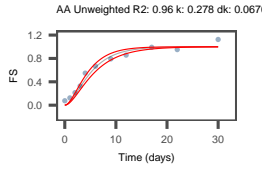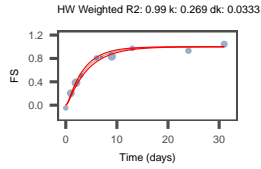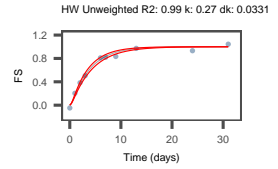

## HNRPU

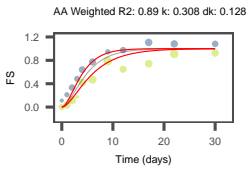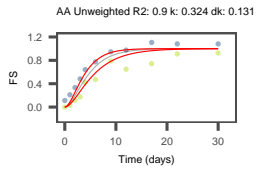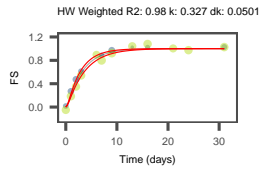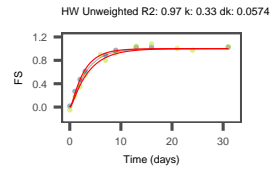

## HOGA1

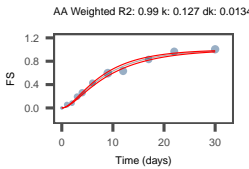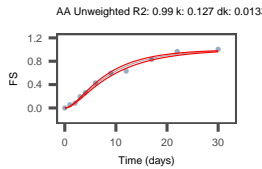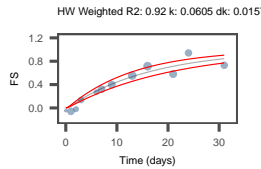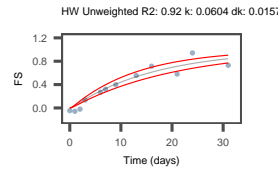

## HPPD

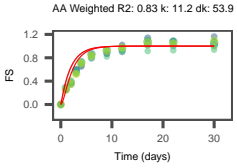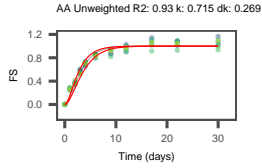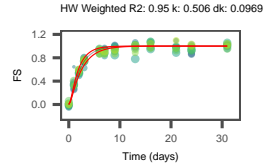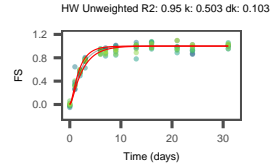

## HPRT

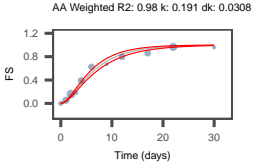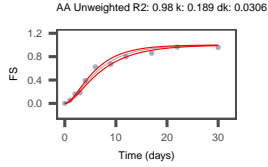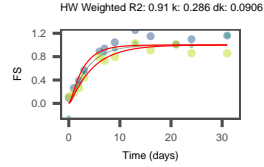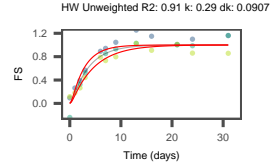

## HS90A

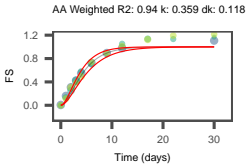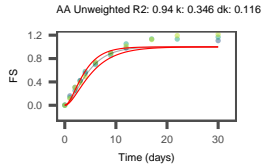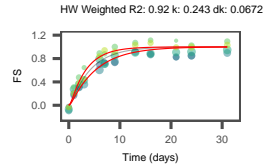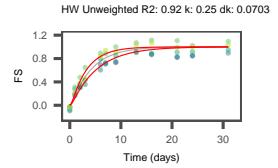

## HS90B

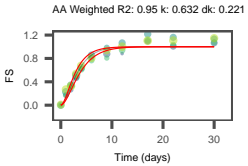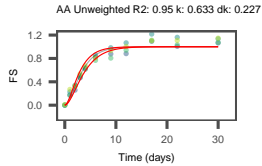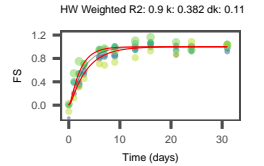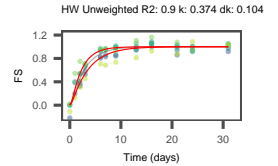

## HSDL2

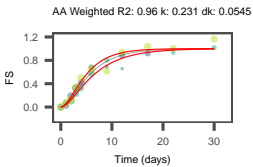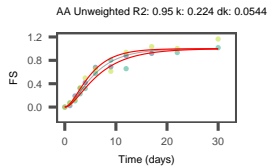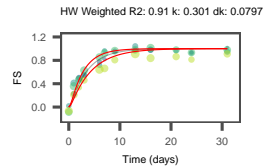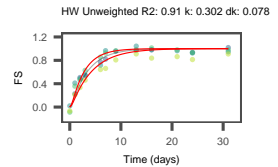

## HSP74

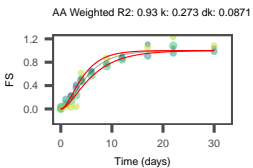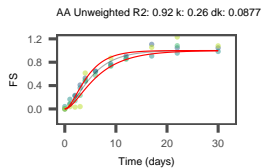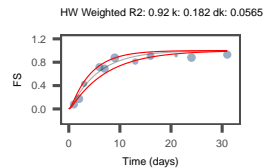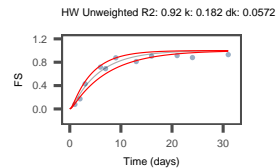



## HSP7C

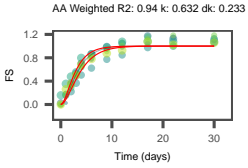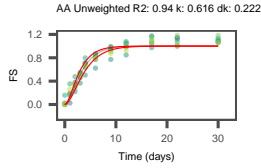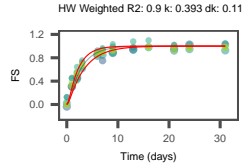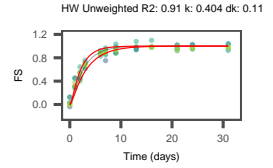

## HUTH

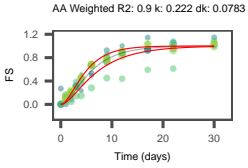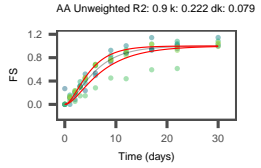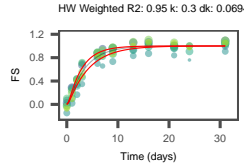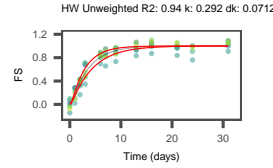

## HUTI

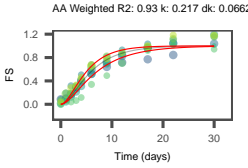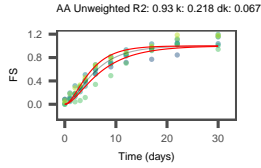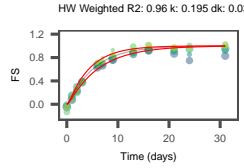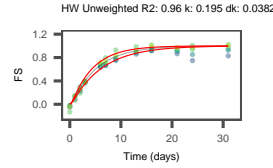

## HUTU

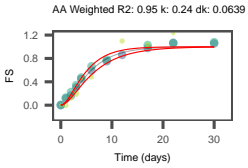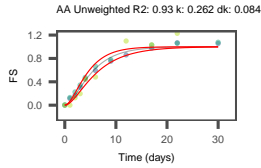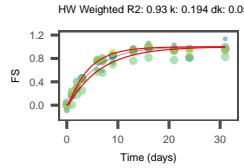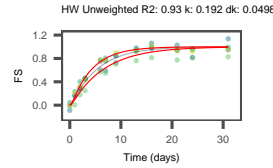

## HYEP

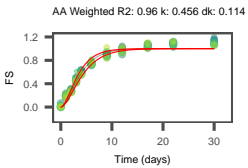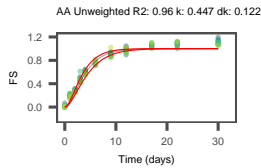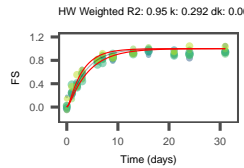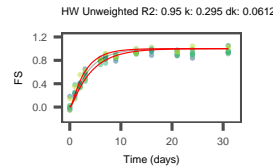

## HYES

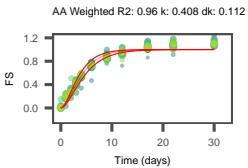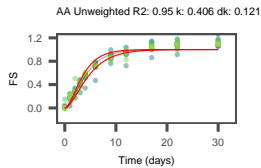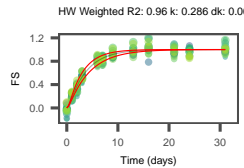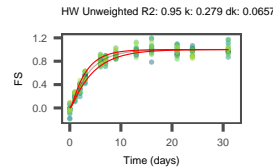

HYOU1

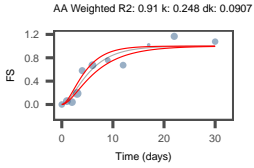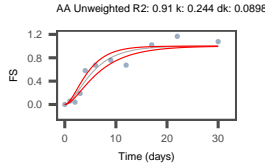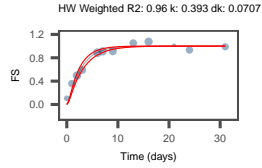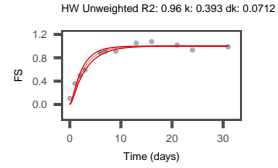

IAH1

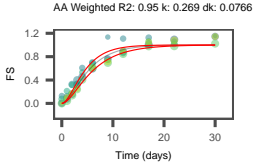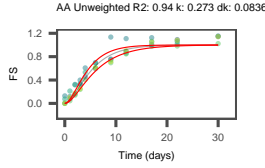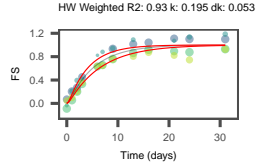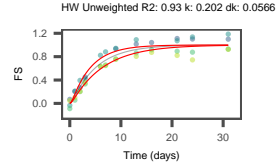

IDH3A

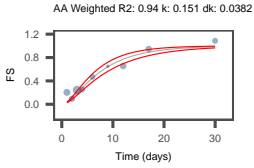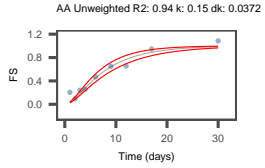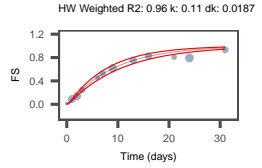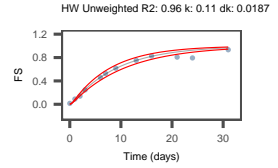

IDHC

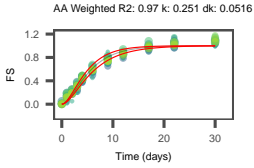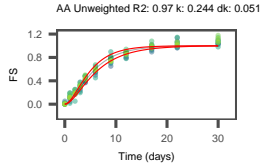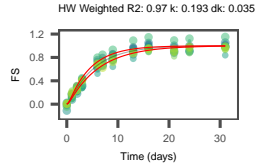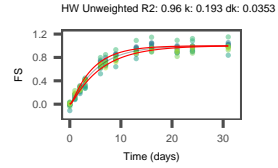

IDHP

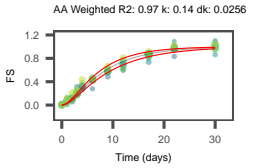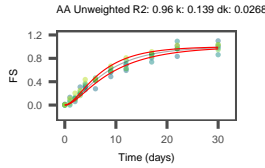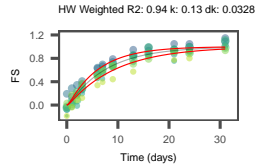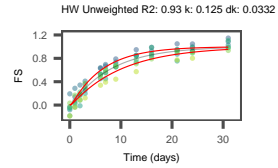

IF2A

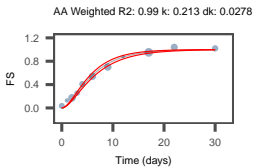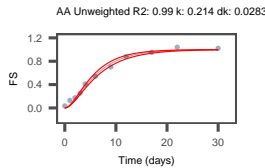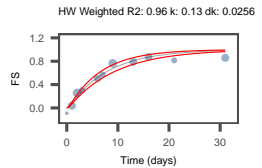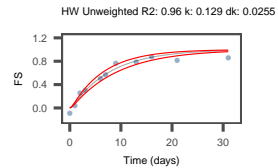

IF4A1

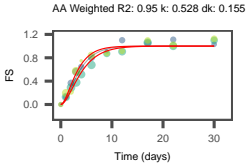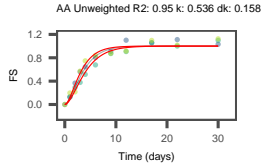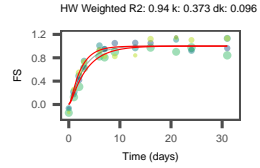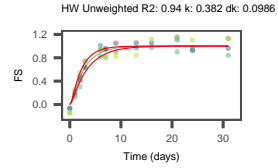

IF4G1

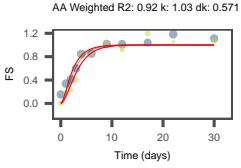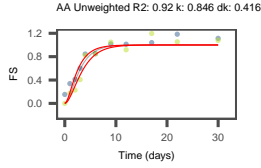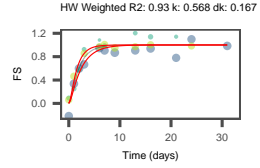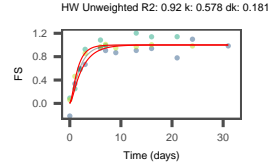

IF4G2

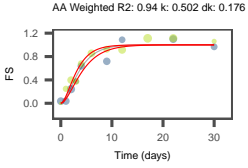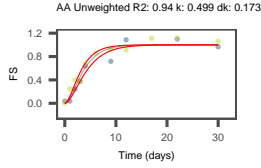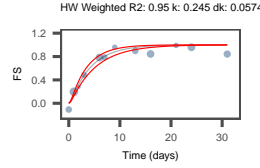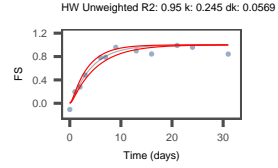

IMB1

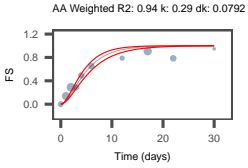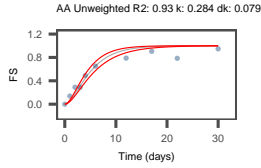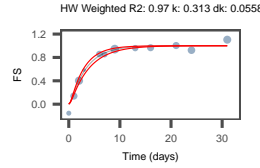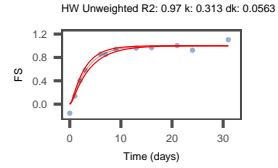

INMT

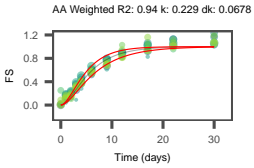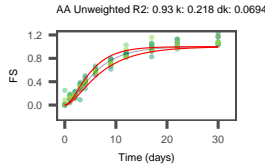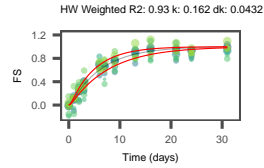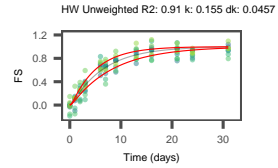

INPP

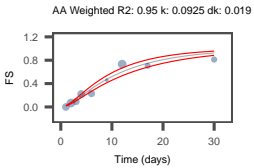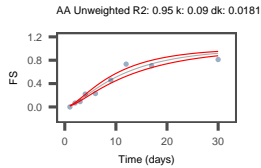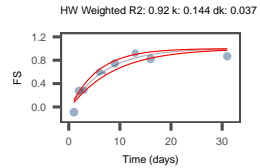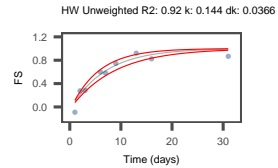

## IPYR

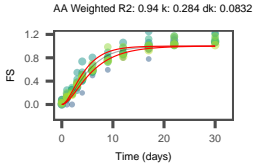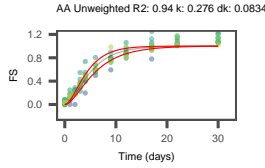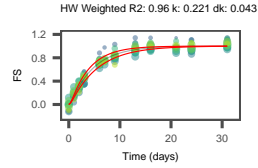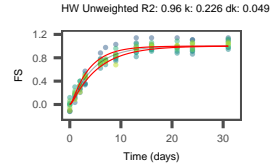

## IPYR2

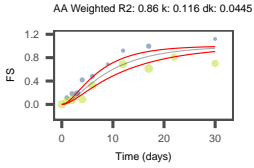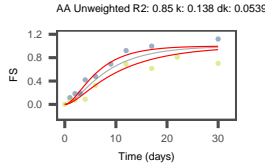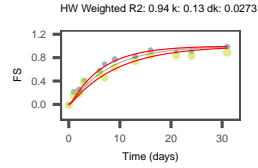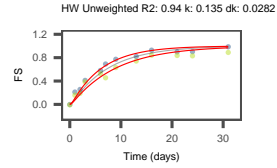

## IQGA2

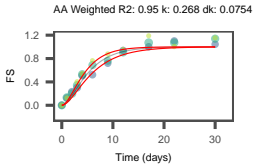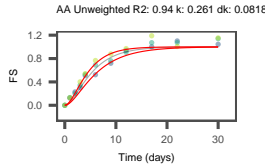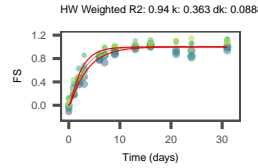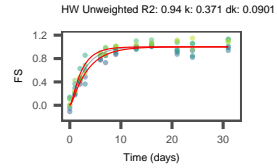

## IRGM1

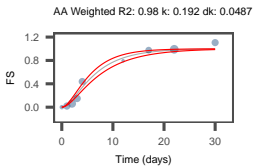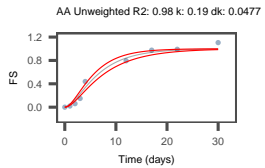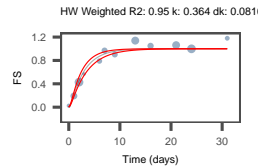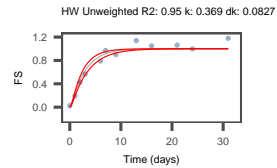

## ISC2A

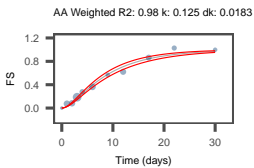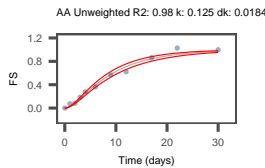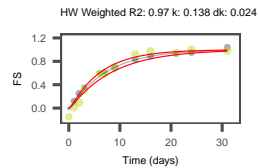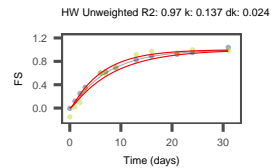

## ISOC1

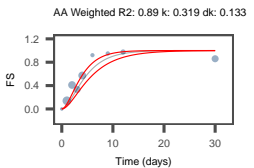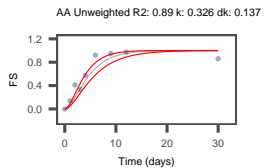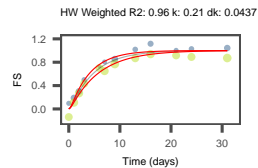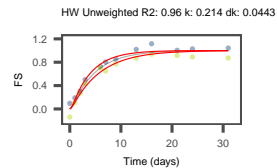

IVD

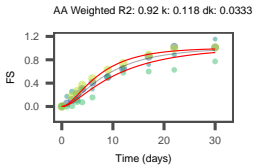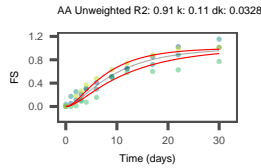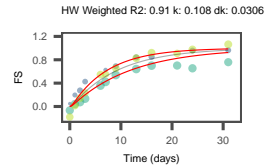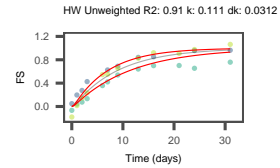

K1C18

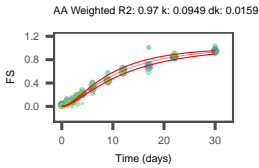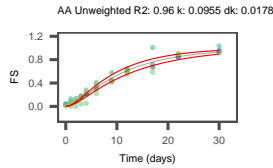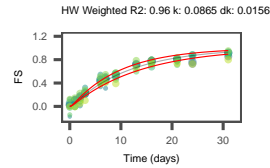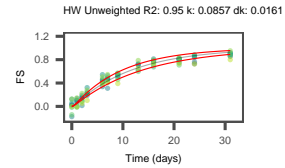

K2C8

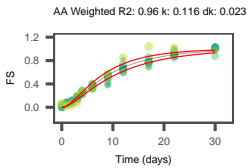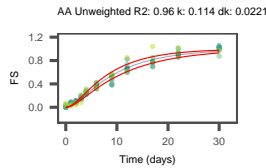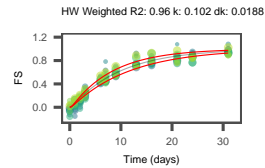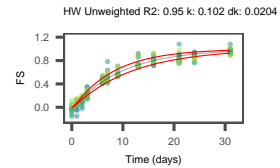

KAD2

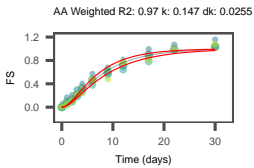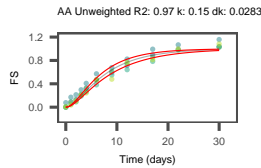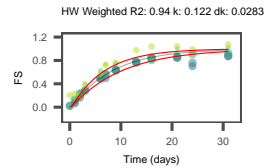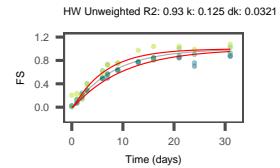

KAD3

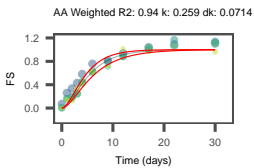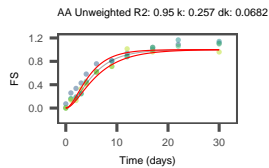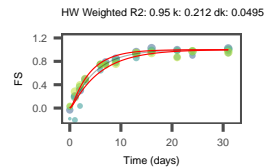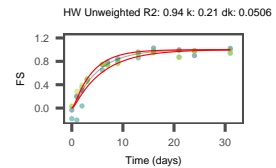

KAT1

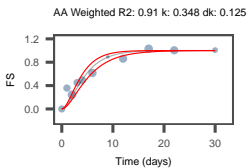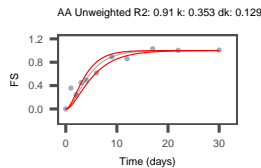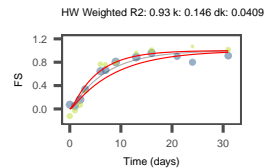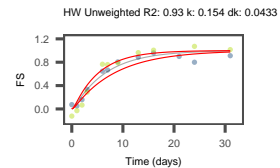

KAT3

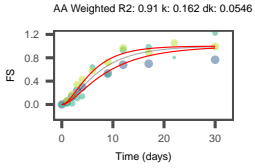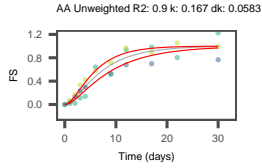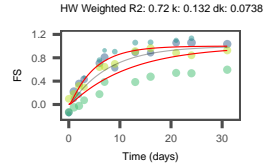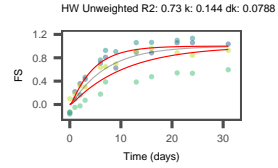

KBL

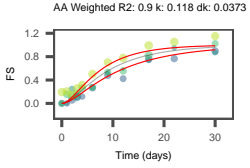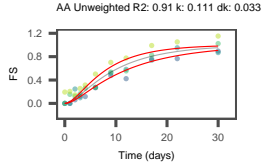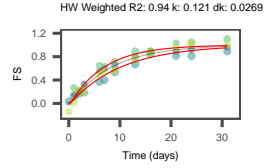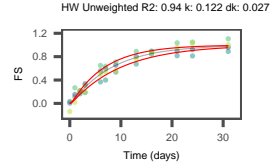

KCY

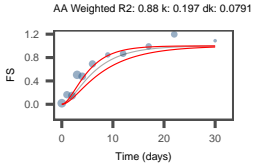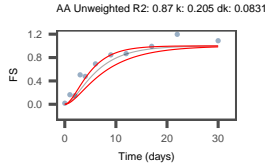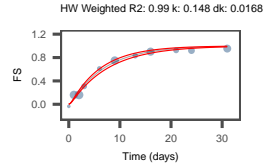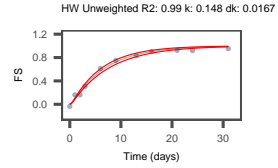

KEG1

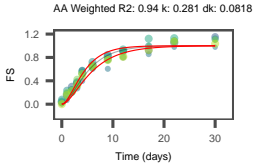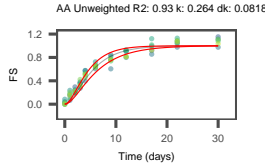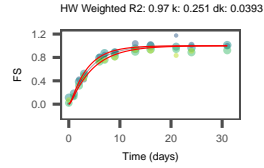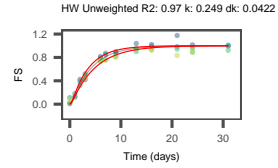

KHK

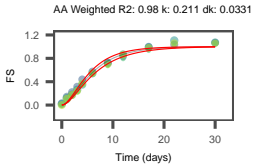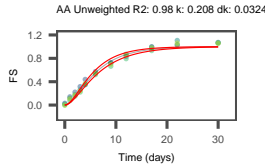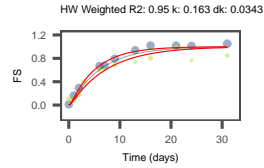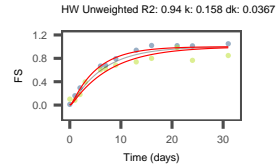

KMO

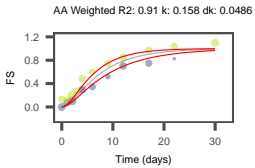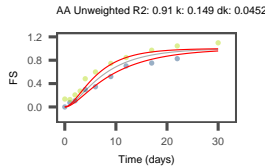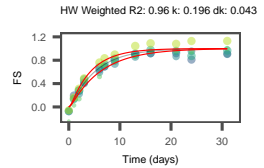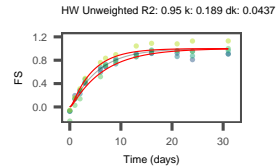

KPYR

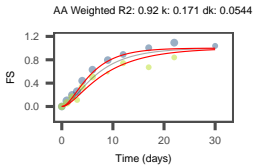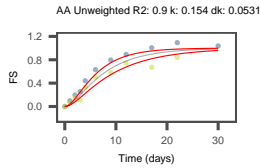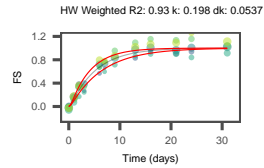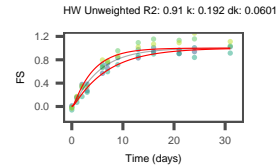

KYNV

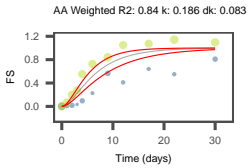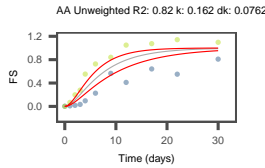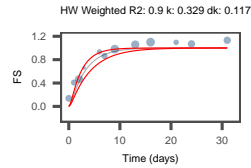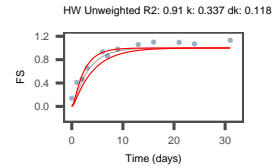

LACB2

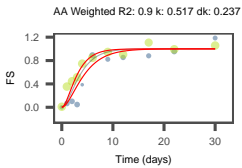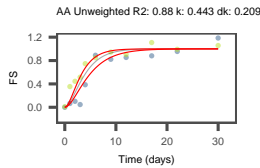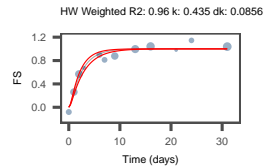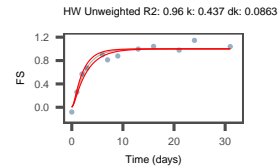

LAMP2

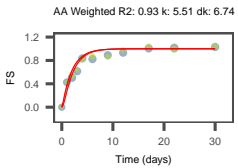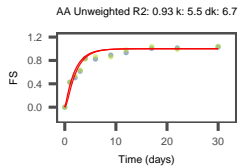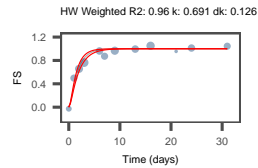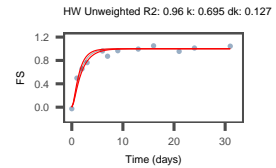

LDHA

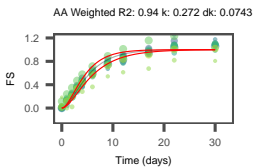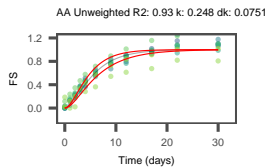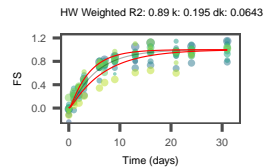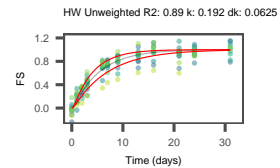

LEG1

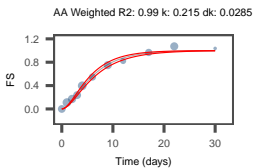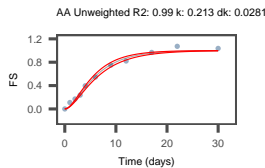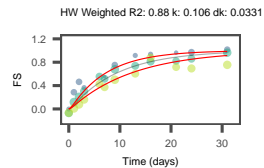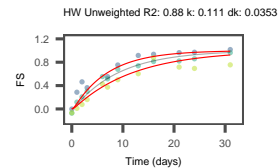

## LEG9

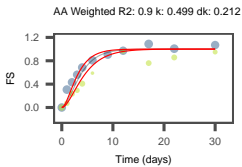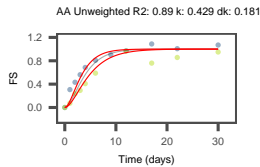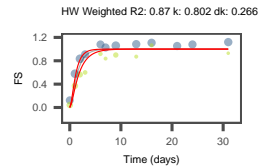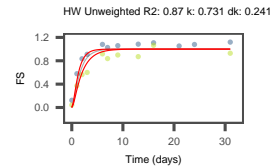

## LGUL

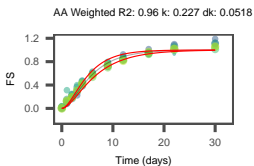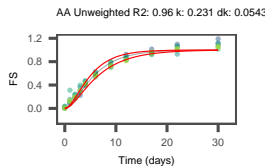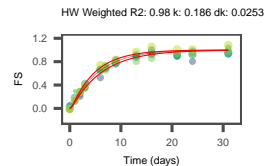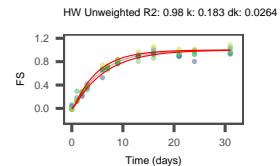

## LHPP

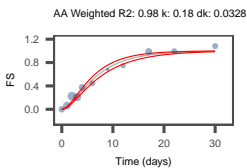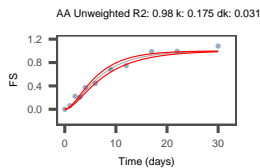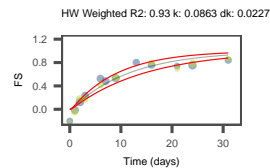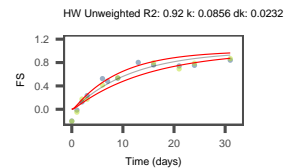

## LICH

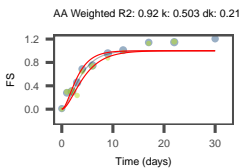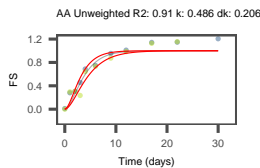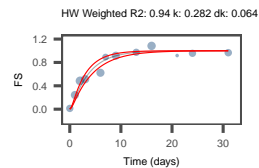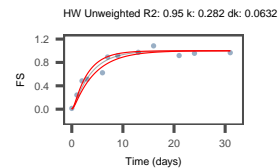

## LKHA4

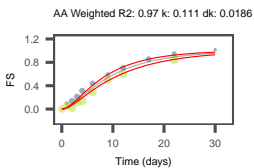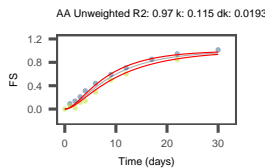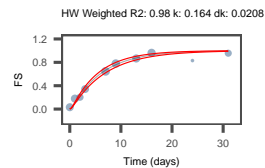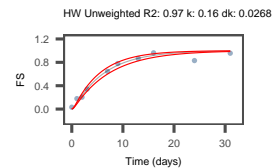

## LMNA

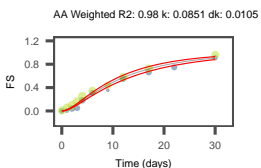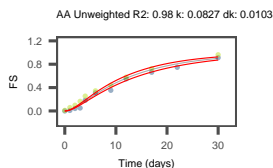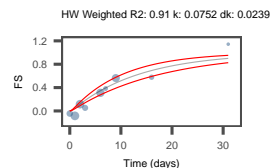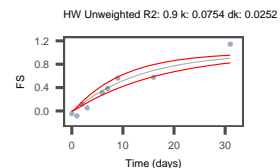



## LONM

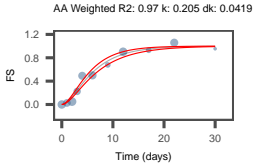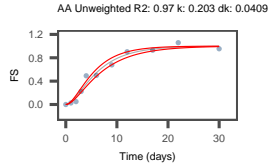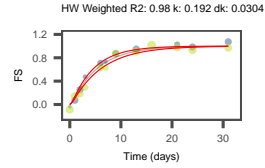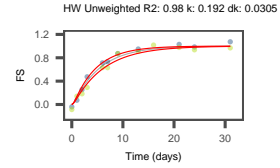

## LPPRC

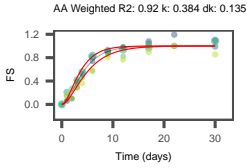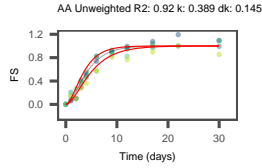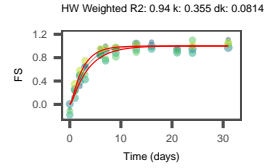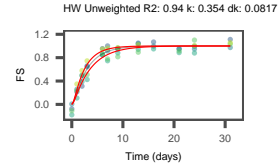

## LRC59

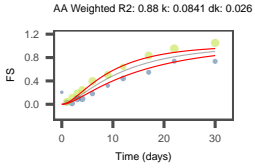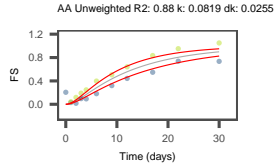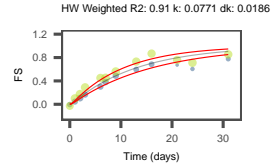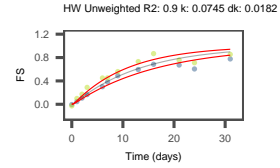

## LYAG

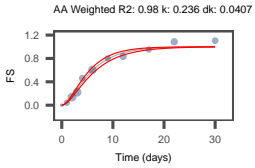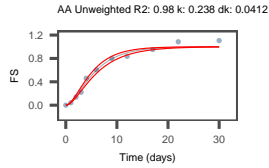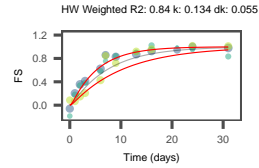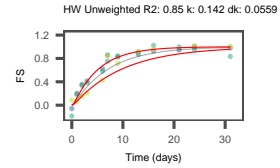

## LYPA1

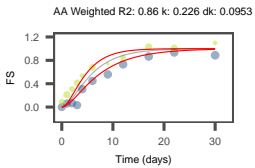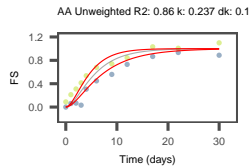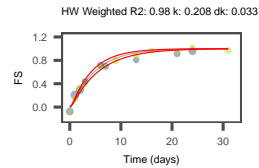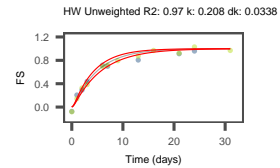

## M2GD

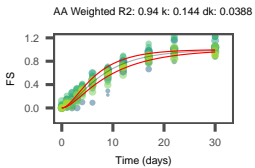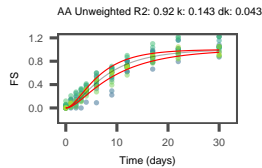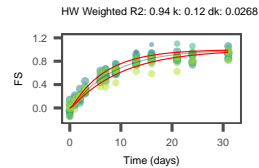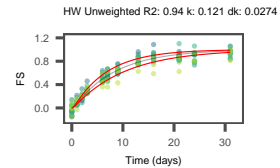

## M2OM

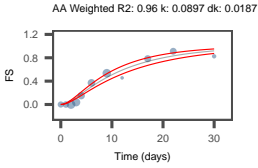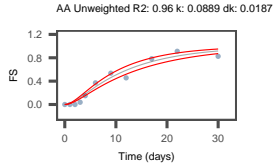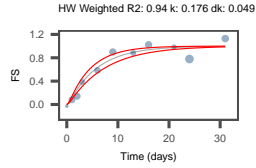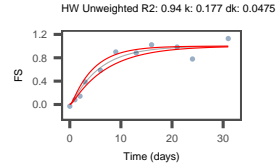

## MAAI

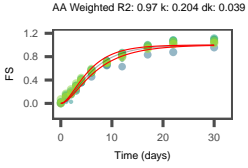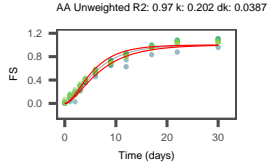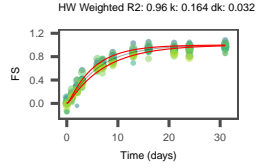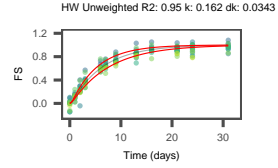

## MAOX

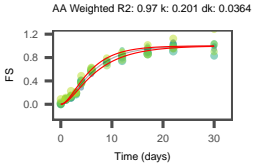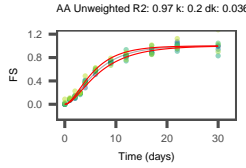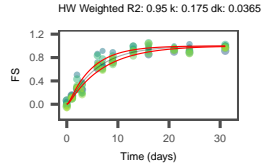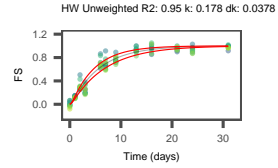

## MARC1

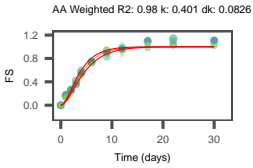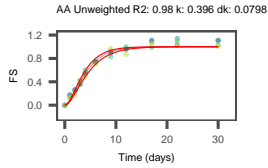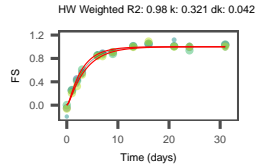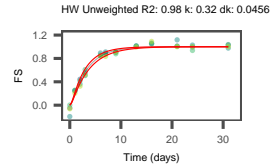

## MARC2

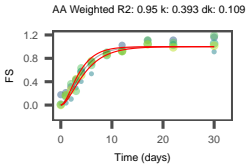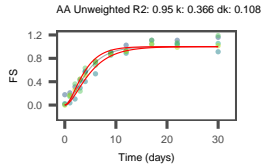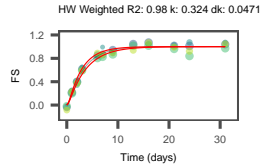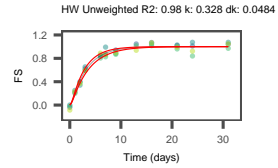

## MATR3

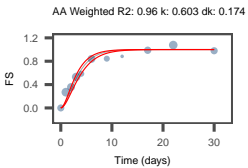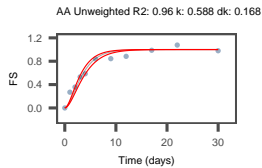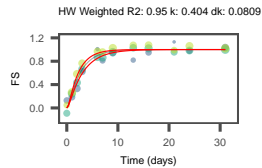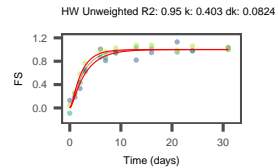

## MCA1

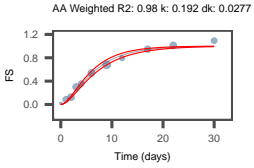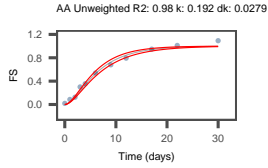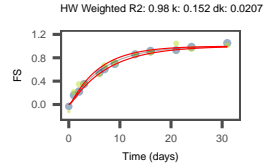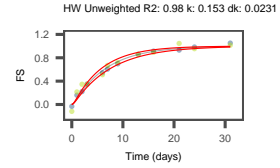

## MCCA

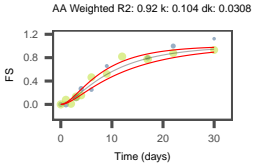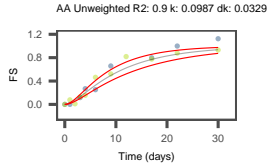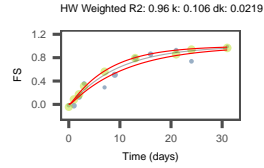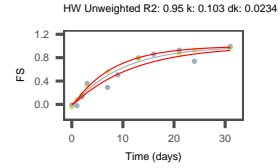

## MCCB

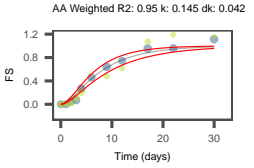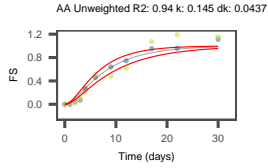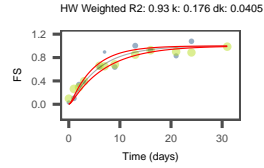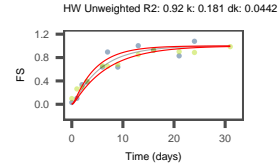

## MCEE

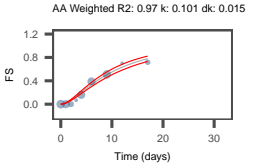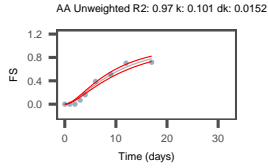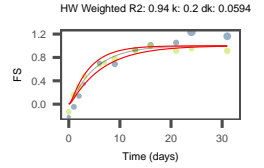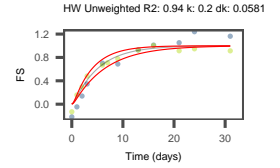

## MCFD2

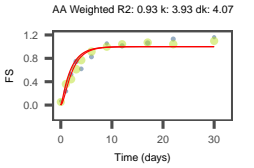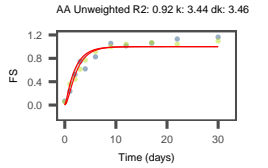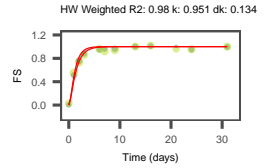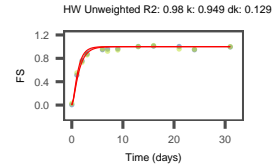

## MDHC

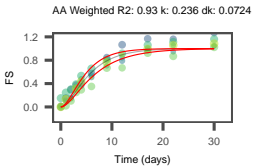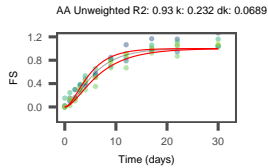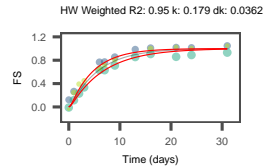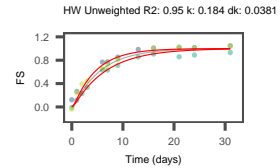

MDHM

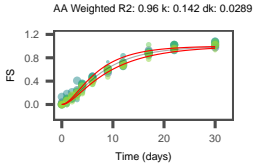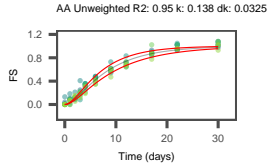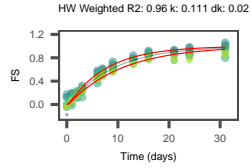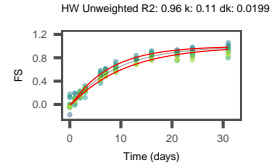

MET7B

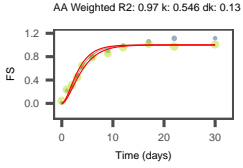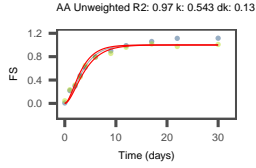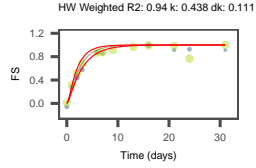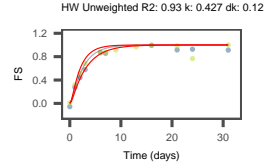

METK1

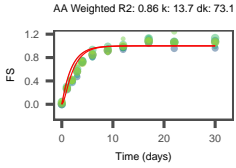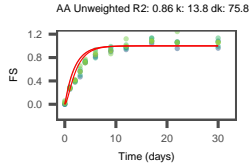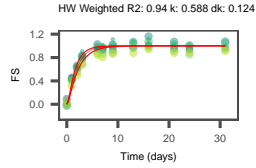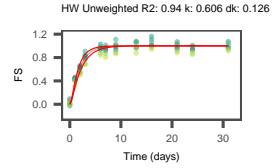

MGST1

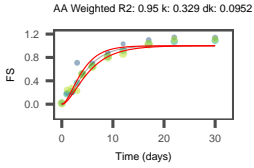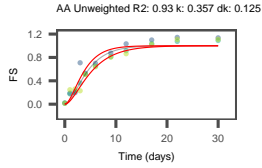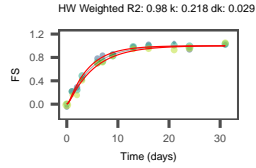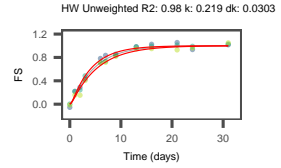

MIC13

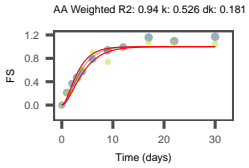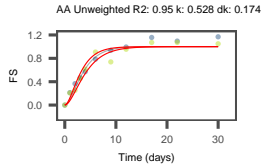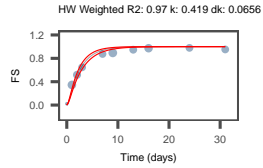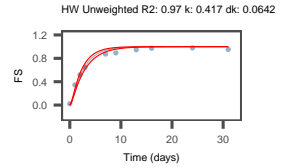

MIC26

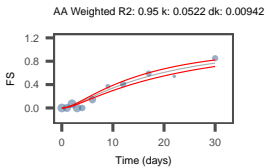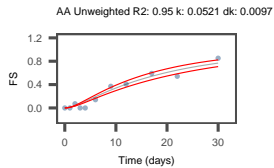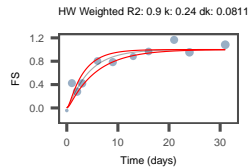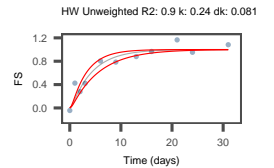

MIC27

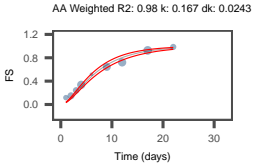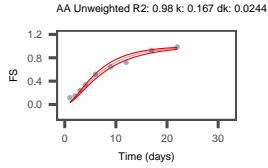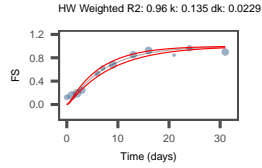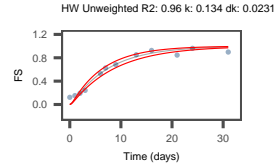

MIC60

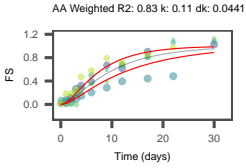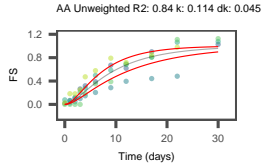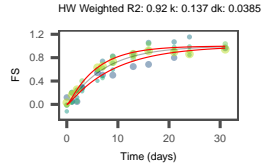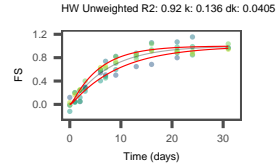

MIF

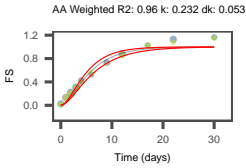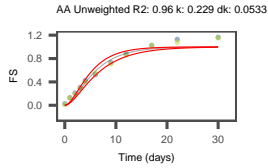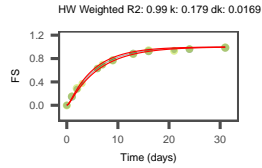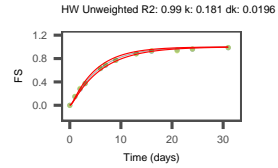

MMSA

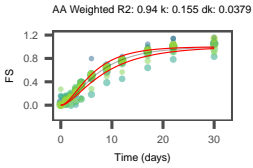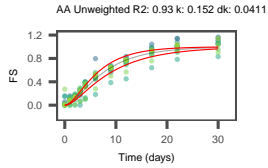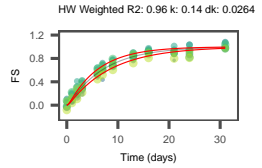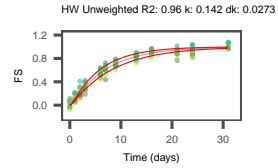

MPC1

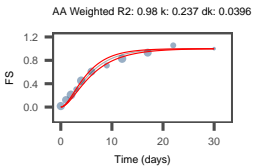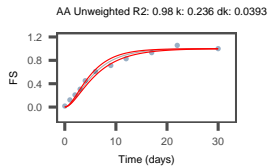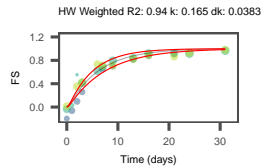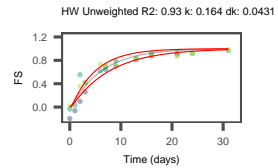

MPCP

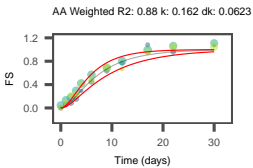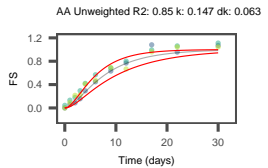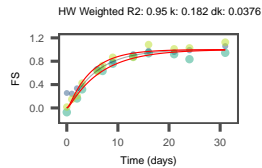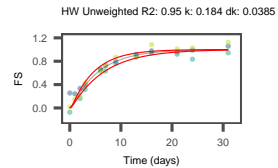

## MPU1

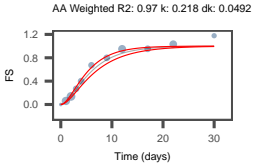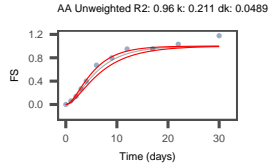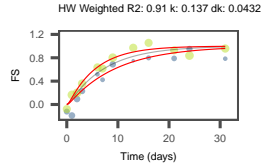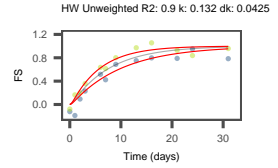

## MRP6

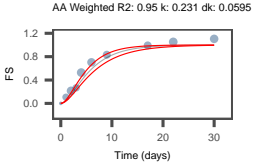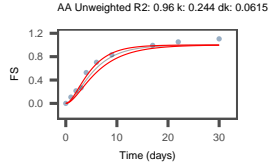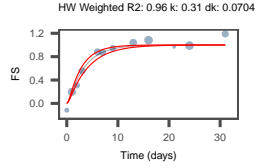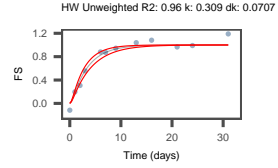

## MSRA

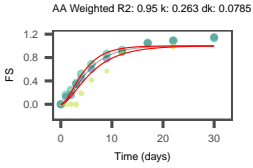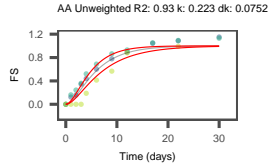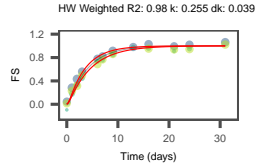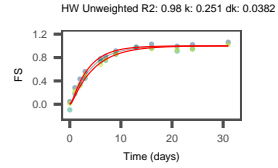

## MTL26

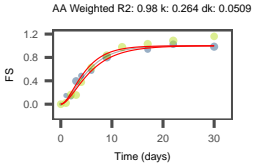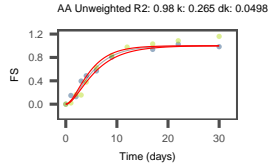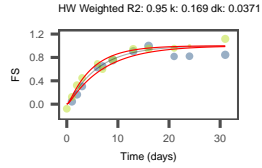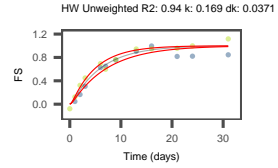

## MTP

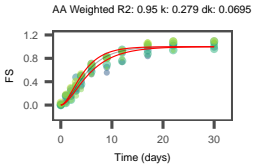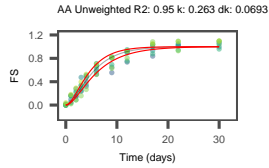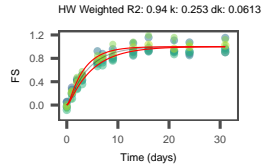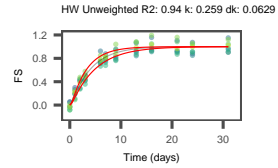

## MTX2

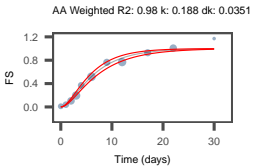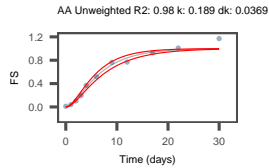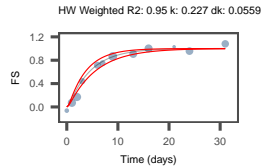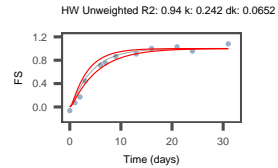

## MUG1

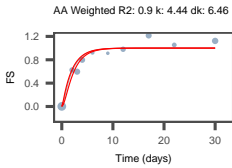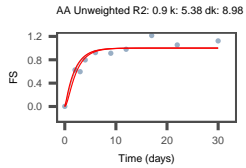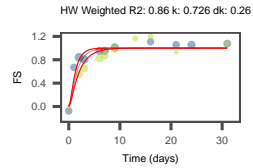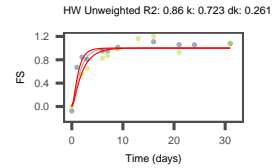

## MUTA

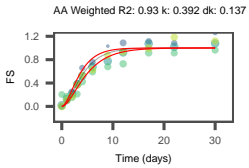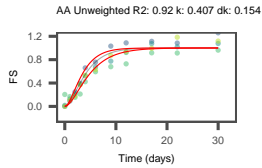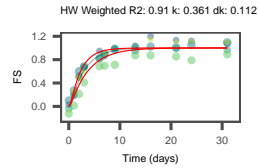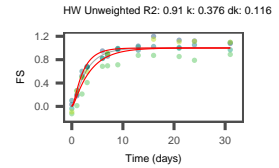

## MVP

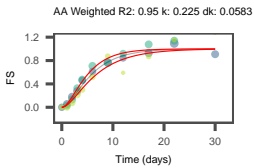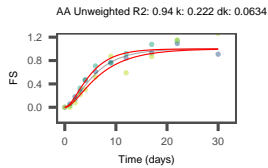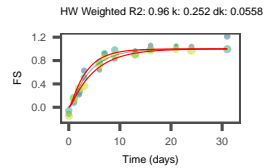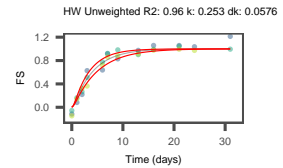

## MYDGF

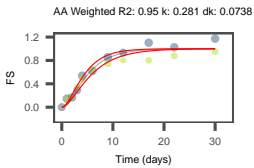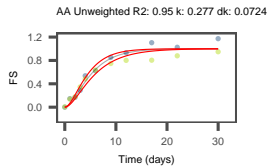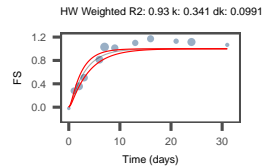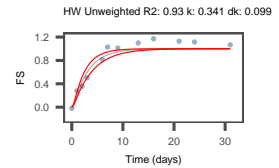

## MYH9

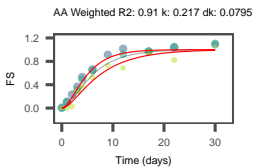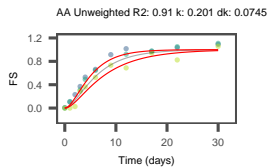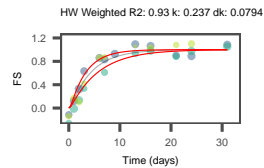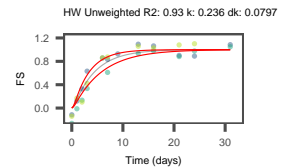

## MYL6

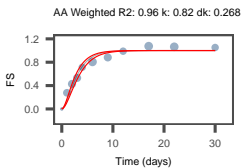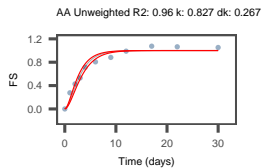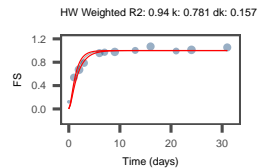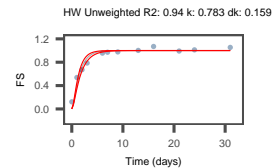





NDUA4

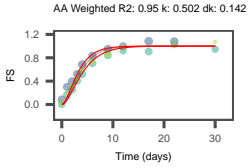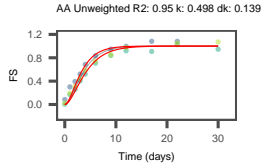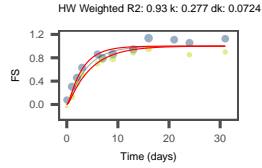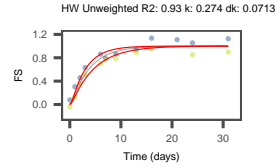

NDUA6

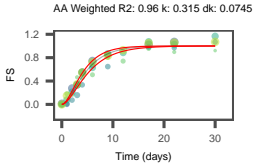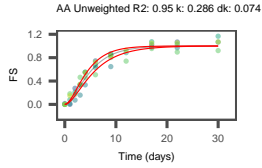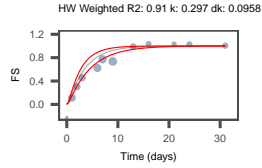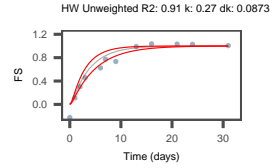

NDUA8

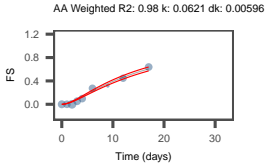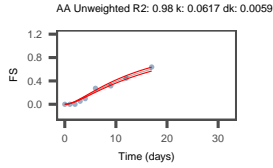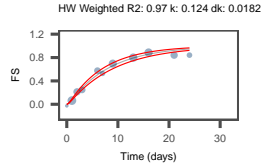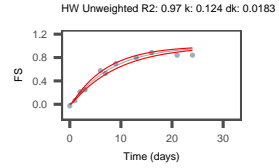

NDUAA

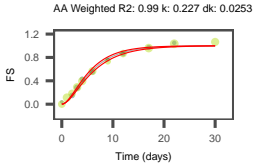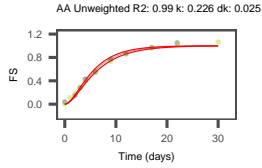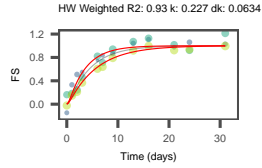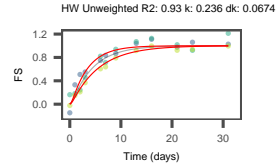

NDUAD

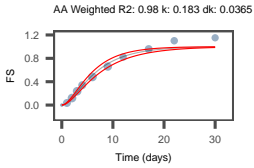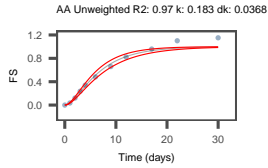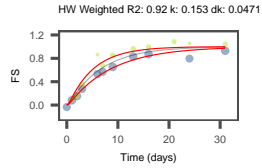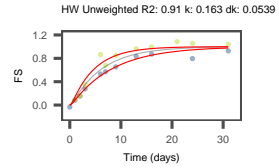

NDUB3

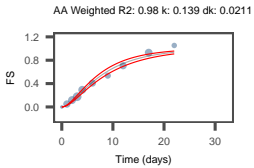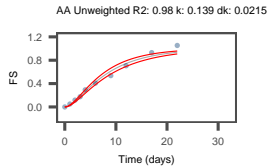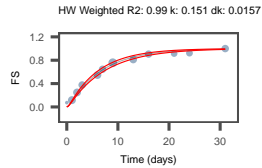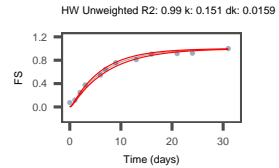

## NDUS1

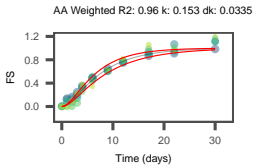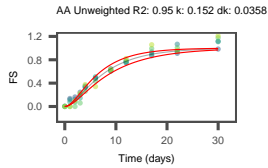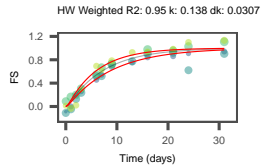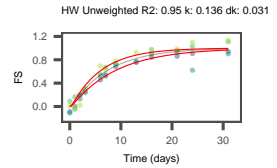

## NDUS2

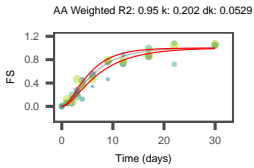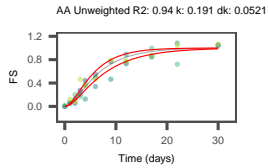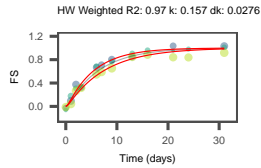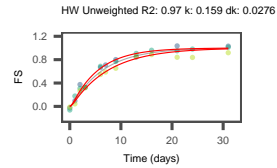

## NDUS6

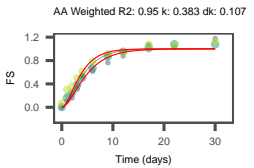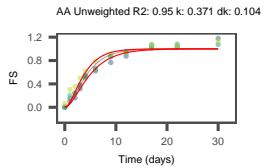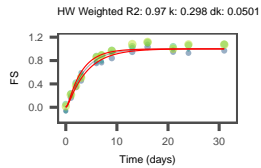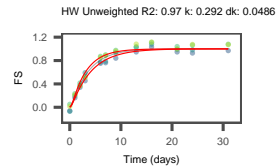

## NDUV1

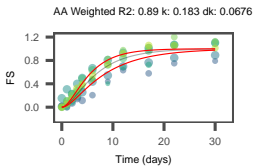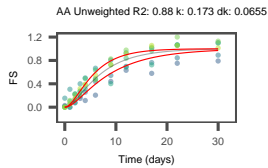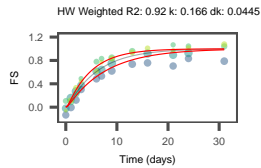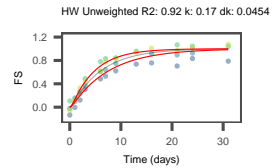

## NDUV2

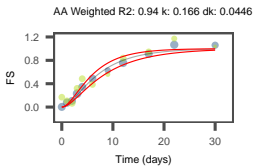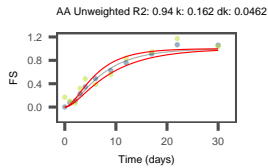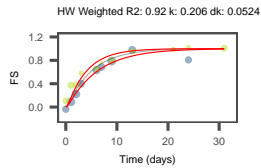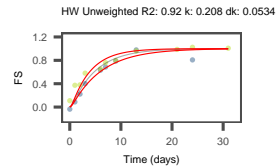

## NDUV3

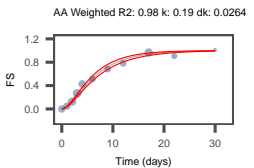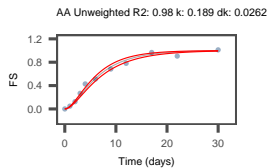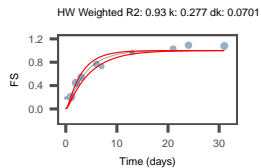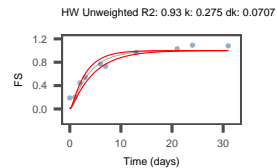

## NFS1

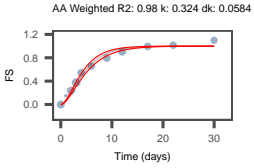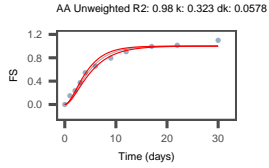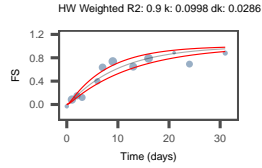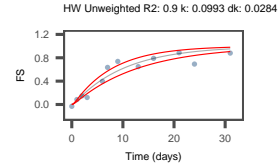

## NIPS1

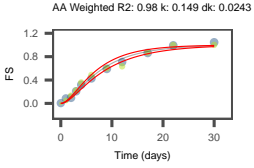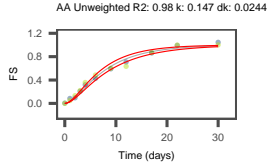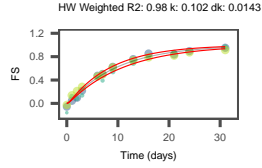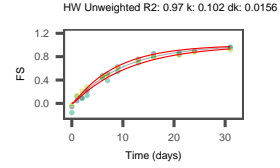

## NIT2

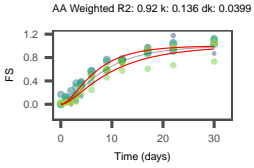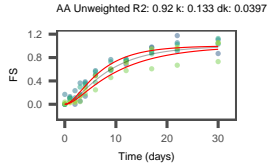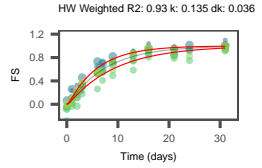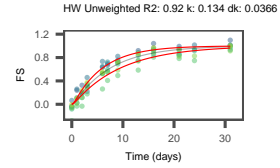

## NNRD

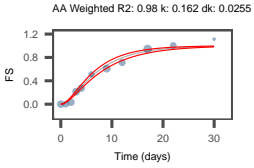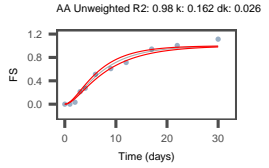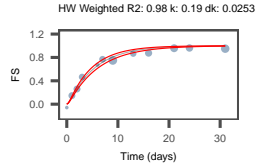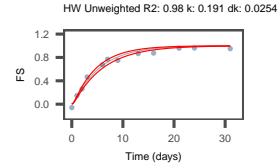

## NNRE

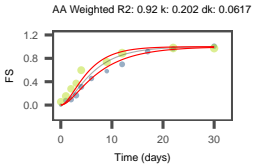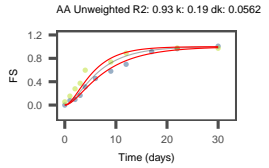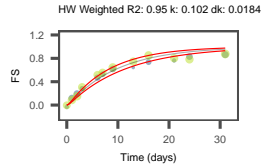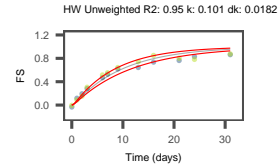

## NNTM

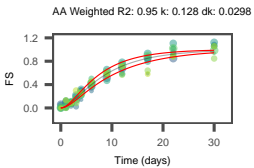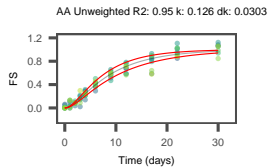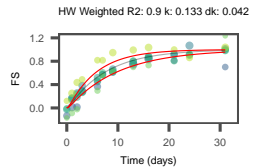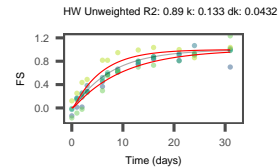

## NPL4

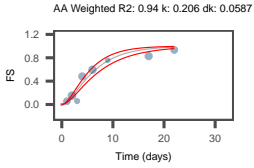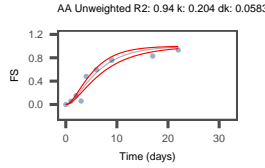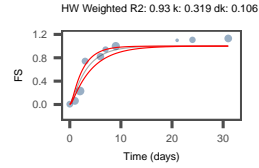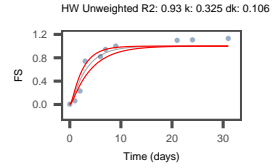

## NPM

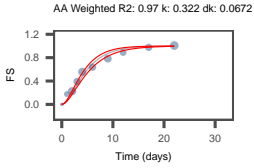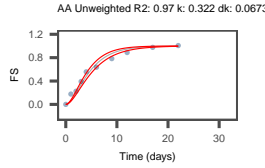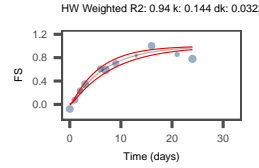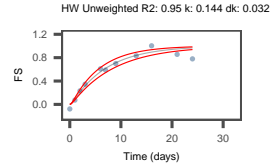

## NPS3B

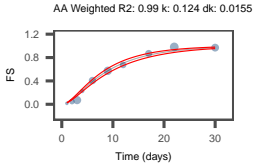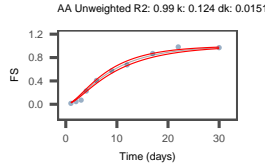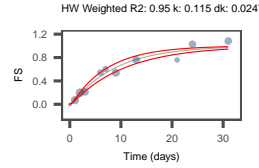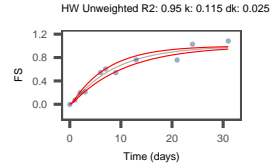

## NQO2

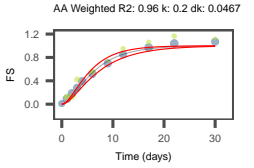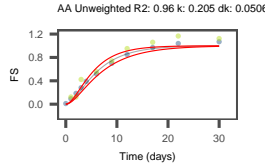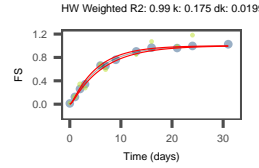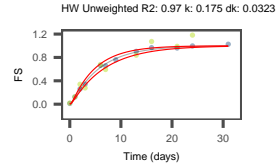

## NT8F2

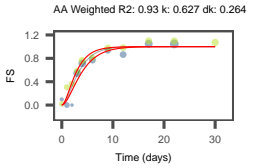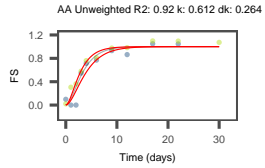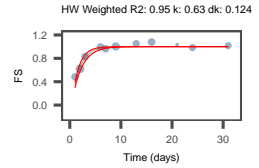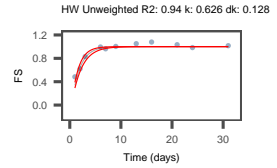

## NU1M

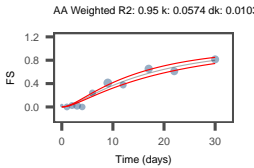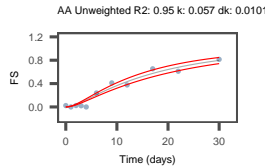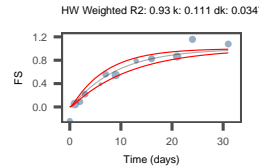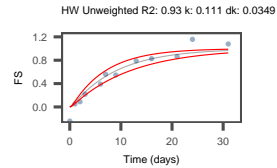

## NU4M

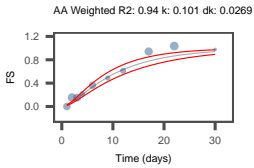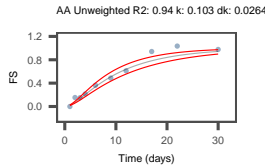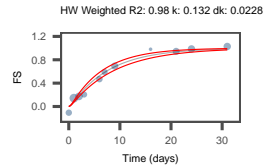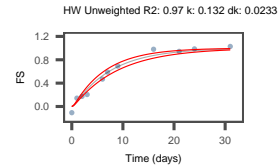

## NU5M

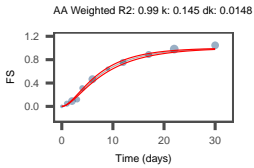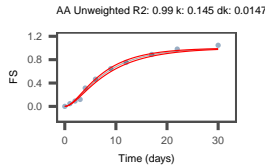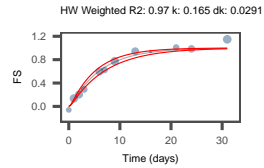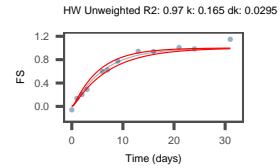

## NUCL

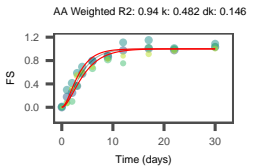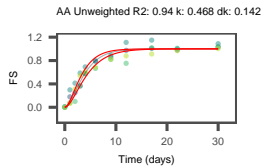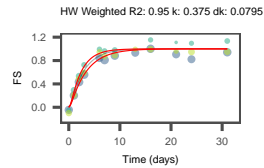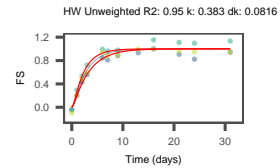

## NUDT7

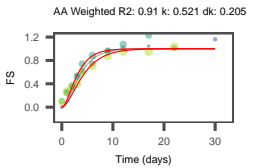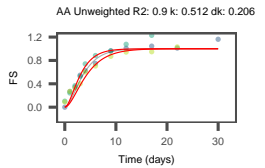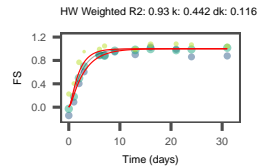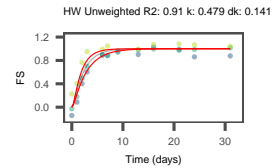

## NUDT8

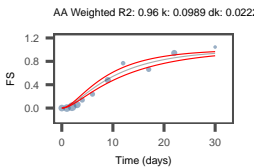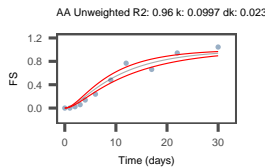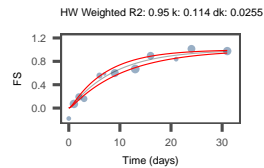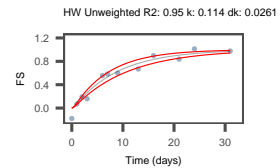

## OAT

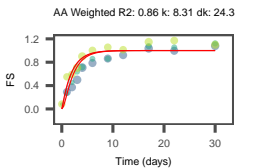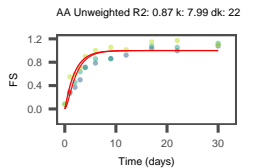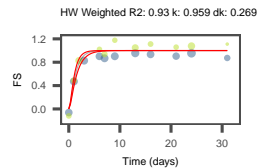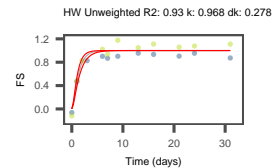

ODB2

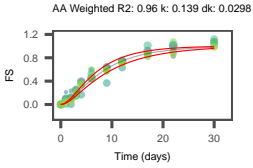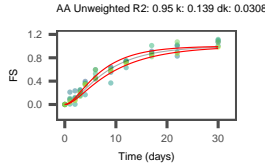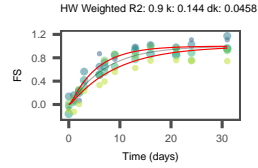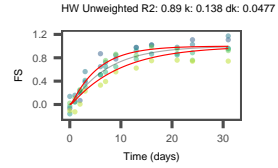

ODBA

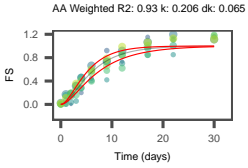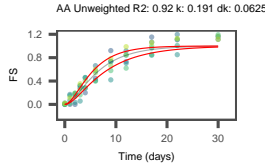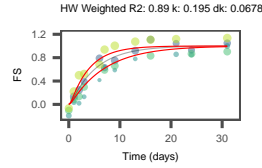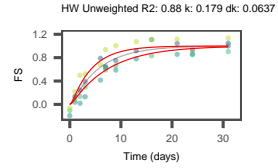

ODBB

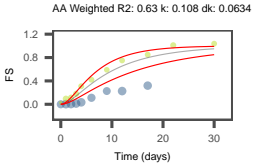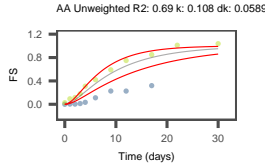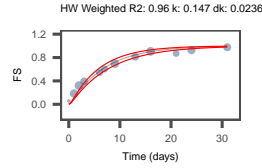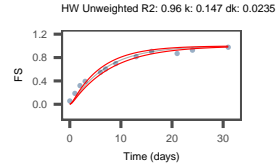

ODO1

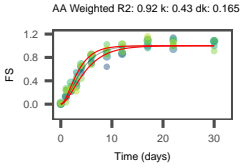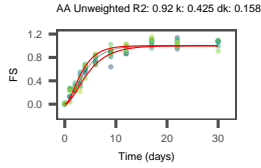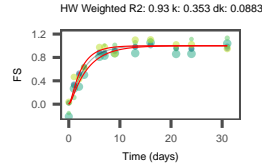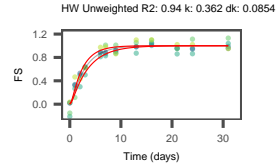

ODP2

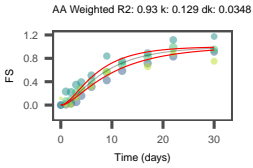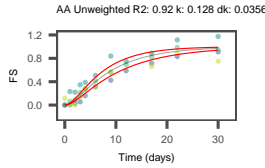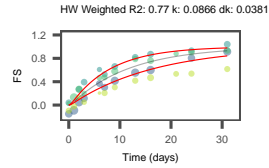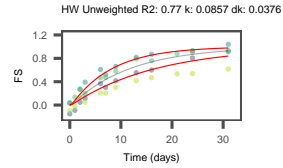

ODPA

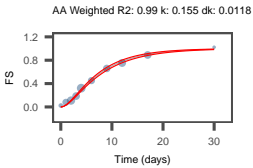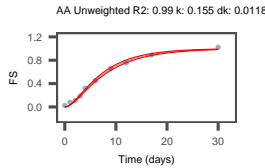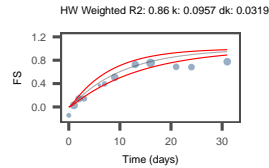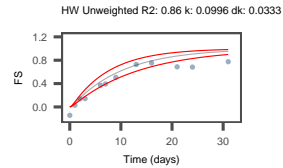

ODPB

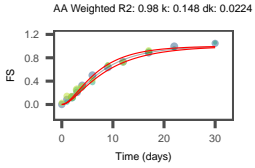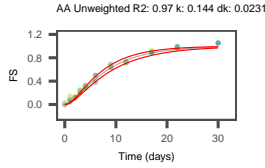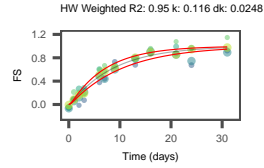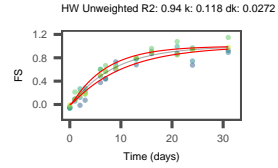

OLA1

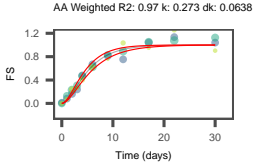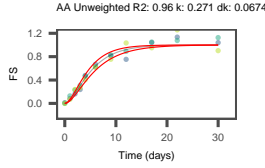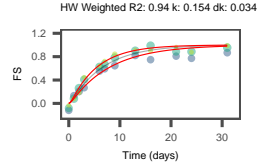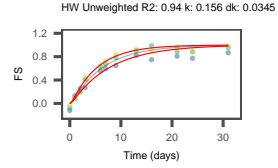

OPLA

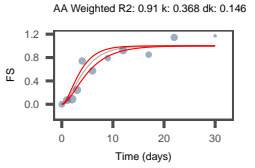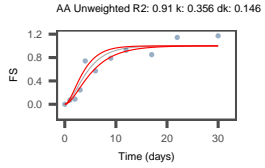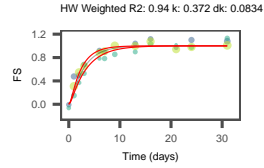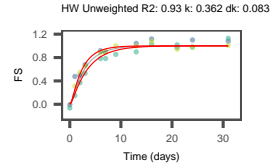

ORNT1

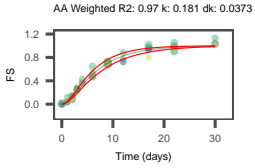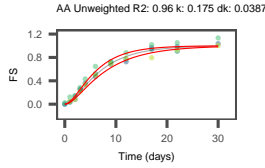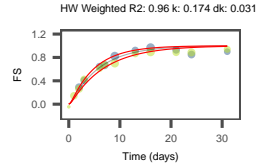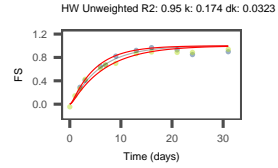

OST48

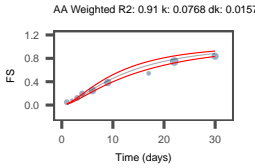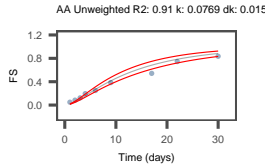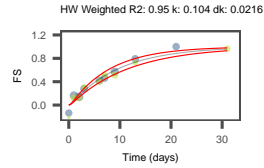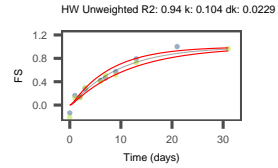

OSTF1

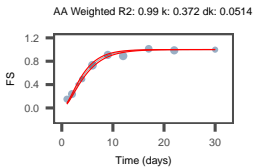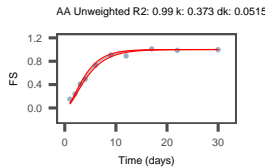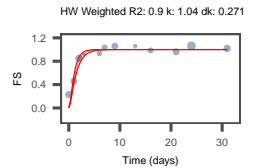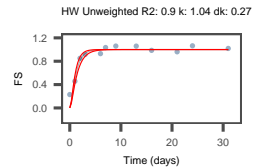

OTC

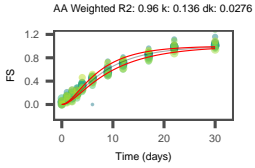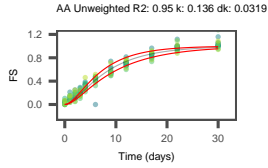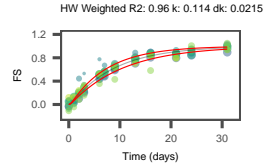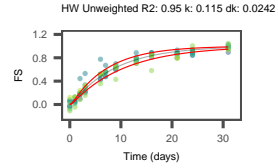

OTUB1

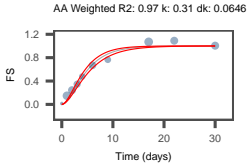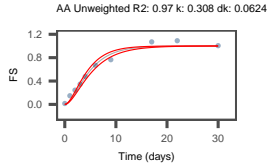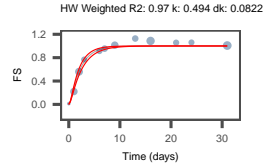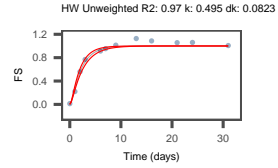

P20D1

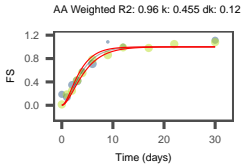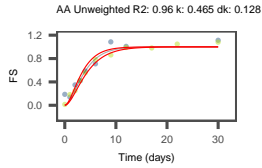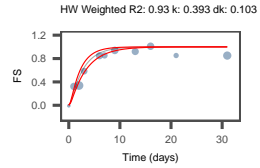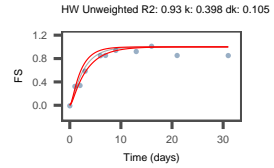

PA2G4

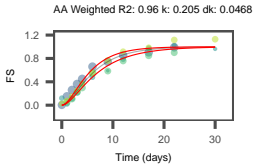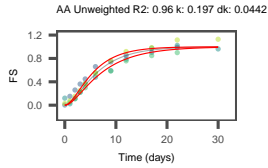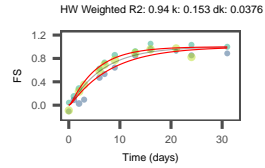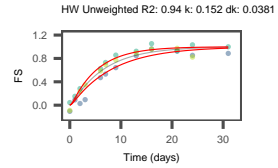

PABP1

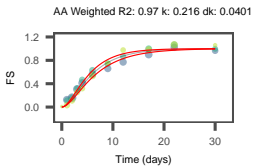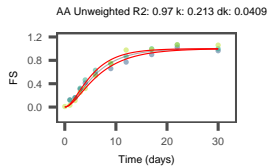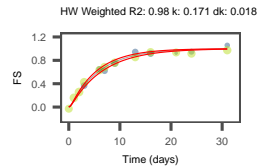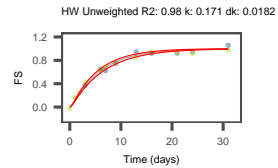

PAHX

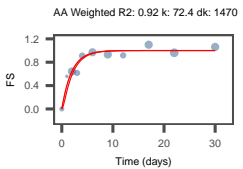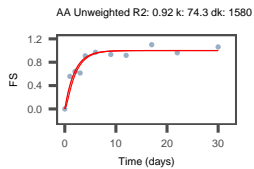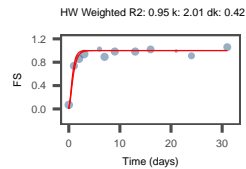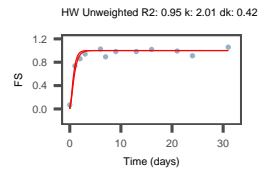



## PAIRB

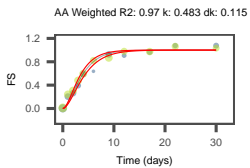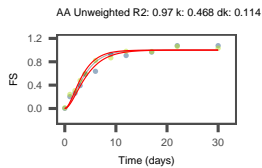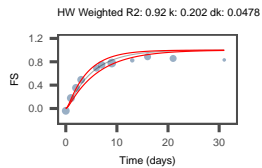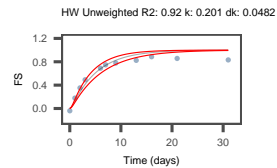

## PAPS2

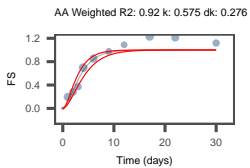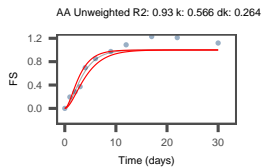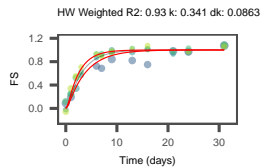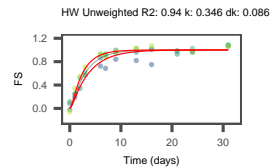

## PARK7

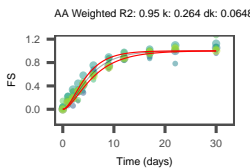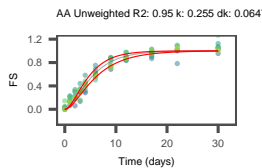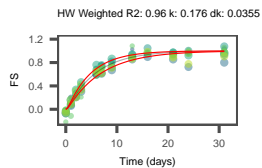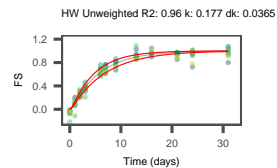

## PCBP1

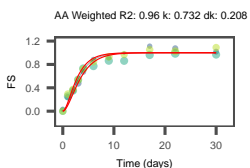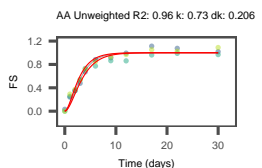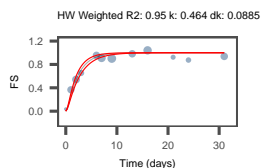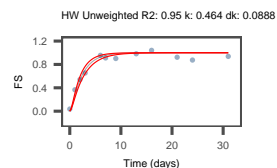

## PCCA

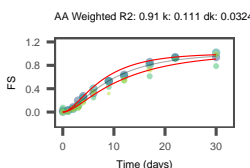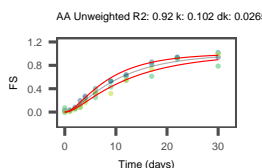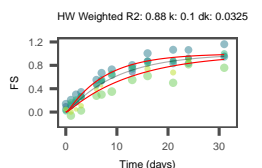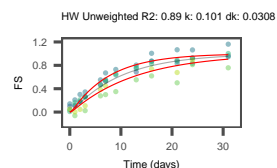

## PCCB

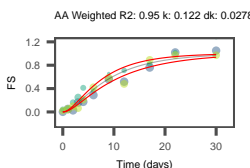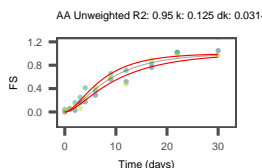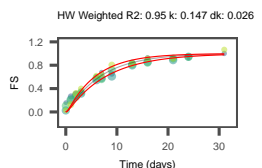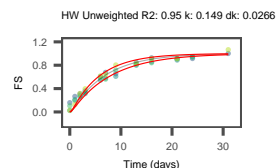

PCKGC

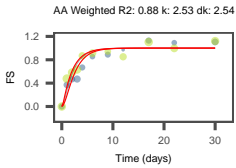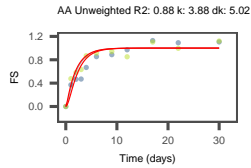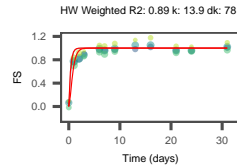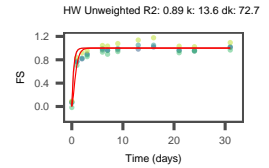

PCY2

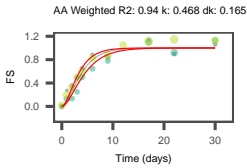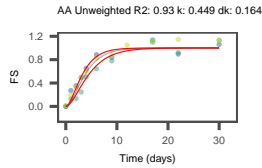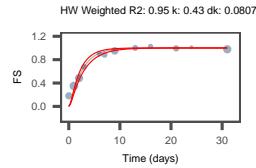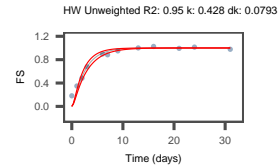

PCYOX

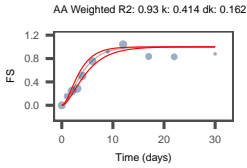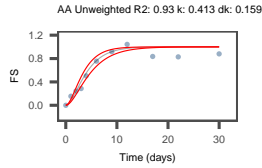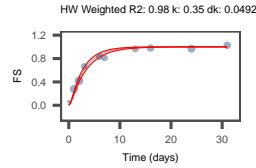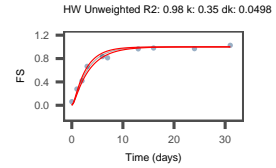

PDC6I

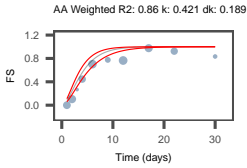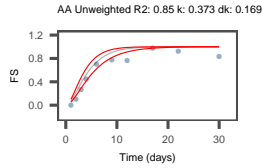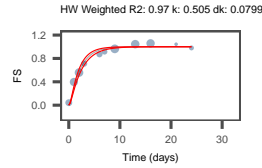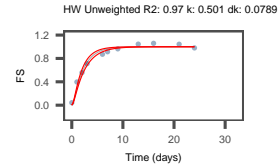

PDIA1

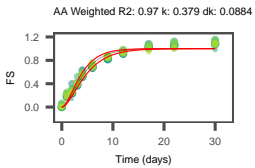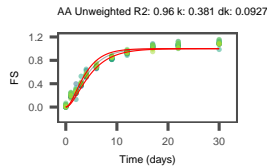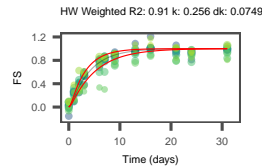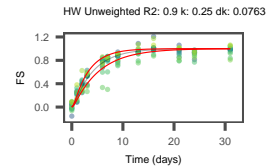

PDIA3

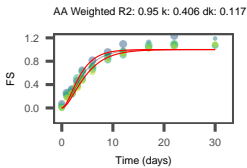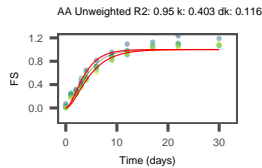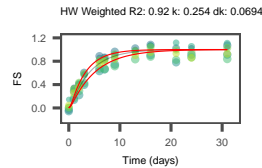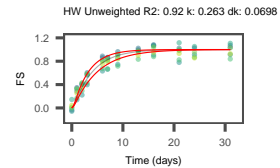

## PDIA4

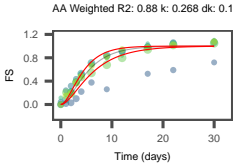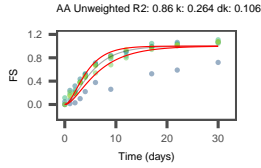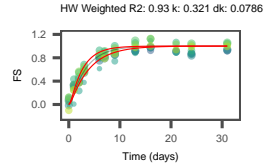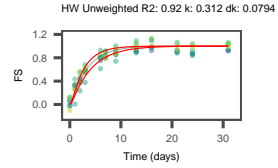

## PDIA5

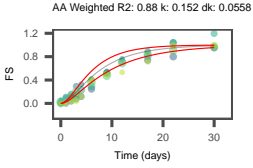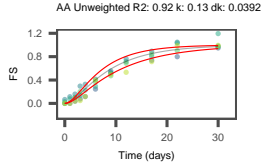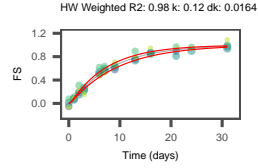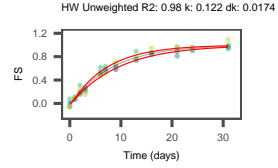

## PDIA6

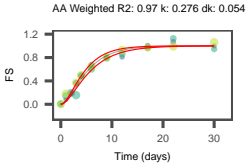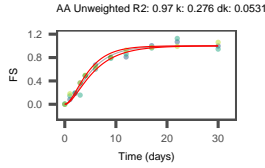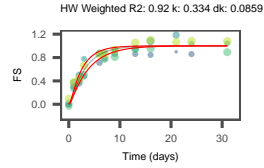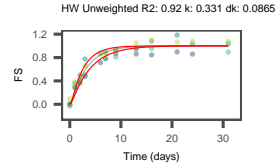

## PDXK

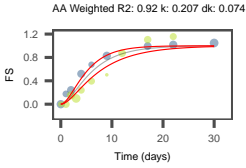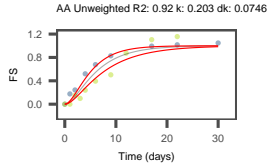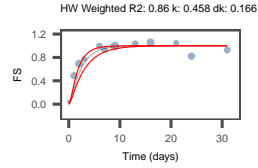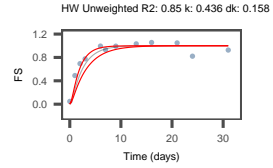

## PEBP1

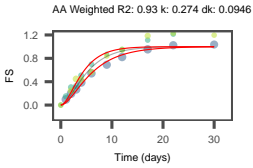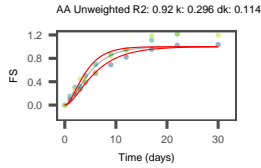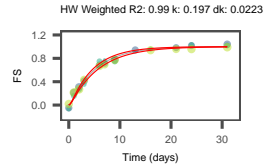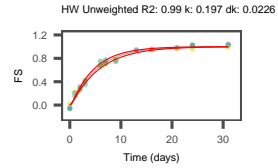

## PECR

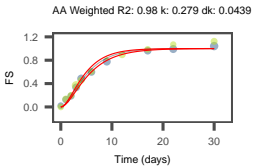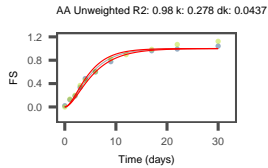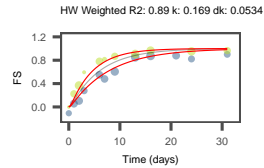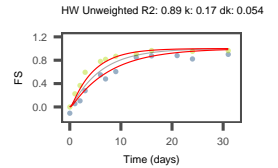

PGAM1

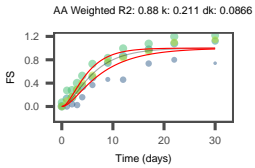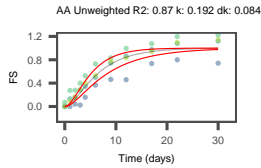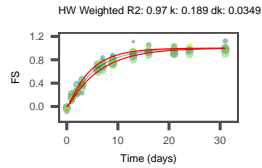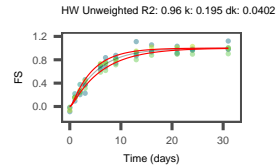

PGBM

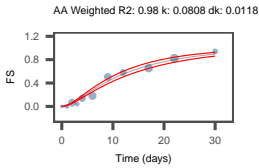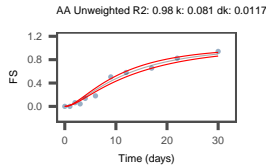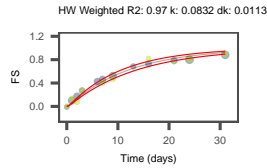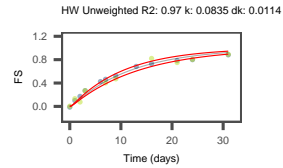

PGK1

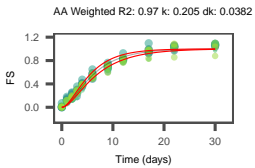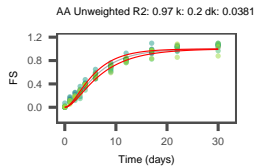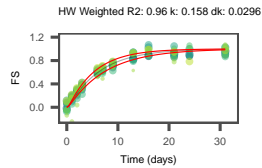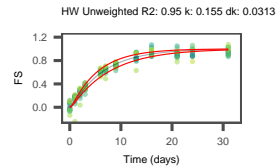

PGM1

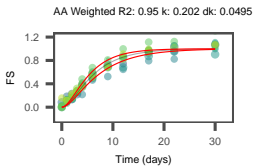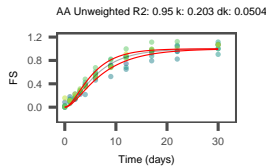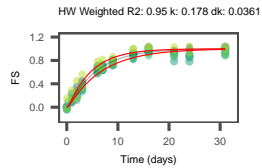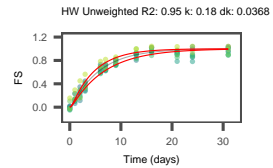

PHB

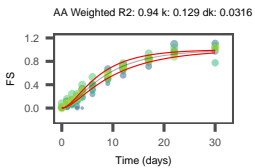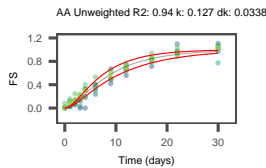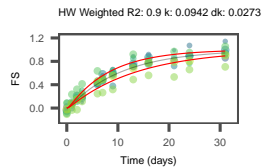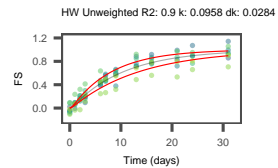

PHB2

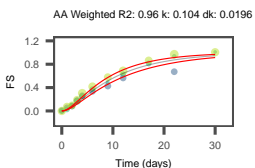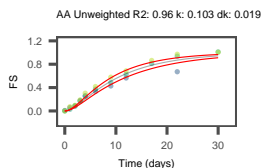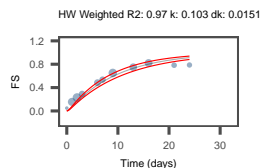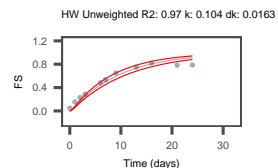

## PHS

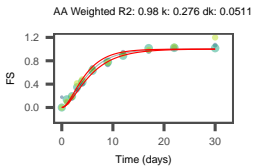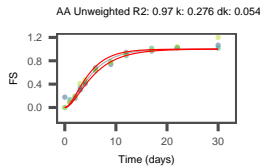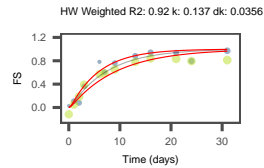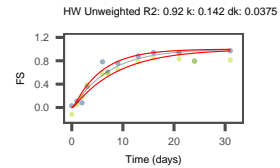

## PICAL

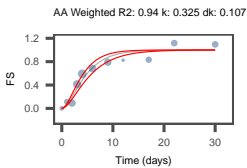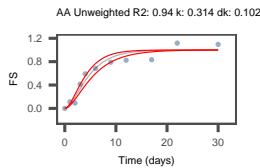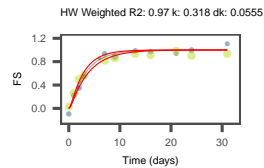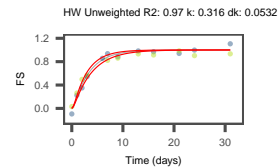

## PLAP

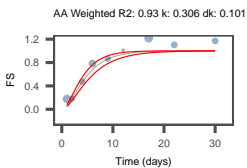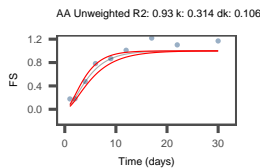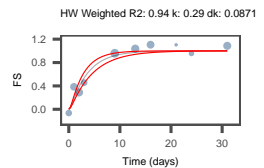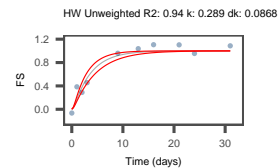

## PLCB

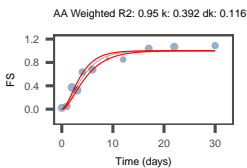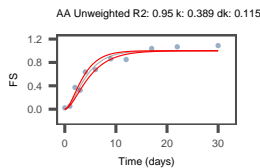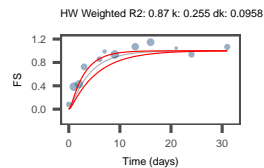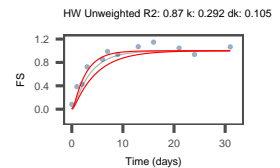

## PLPHP

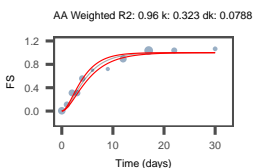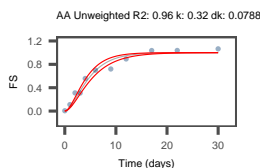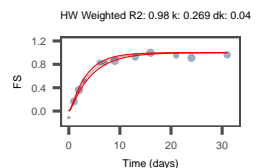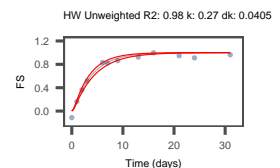

## PLSL

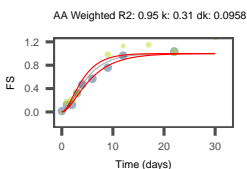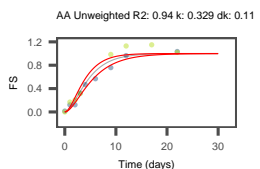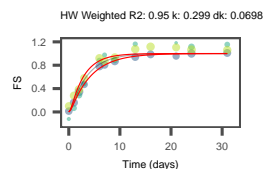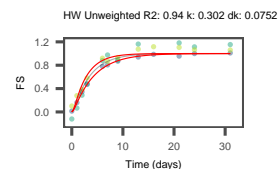



## PRDX1

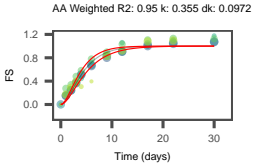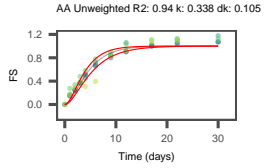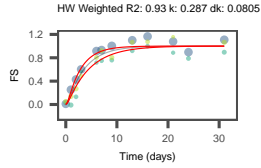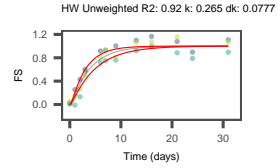

## PRDX2

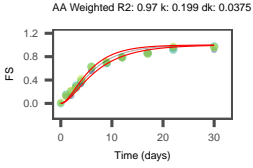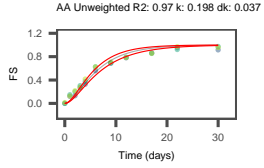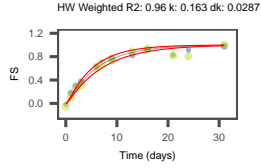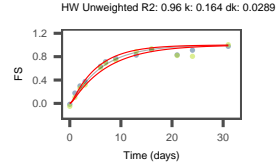

## PRDX3

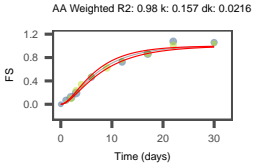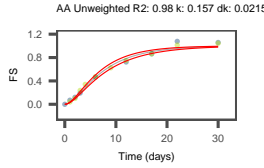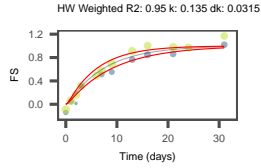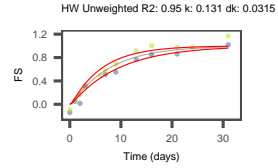

## PRDX4

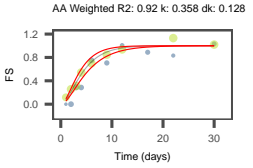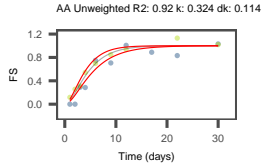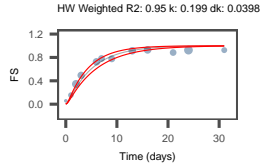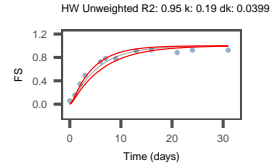

## PRDX5

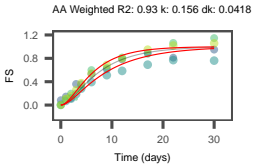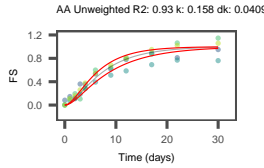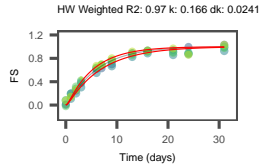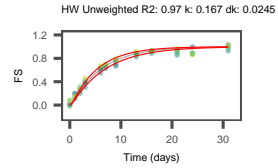

## PRDX6

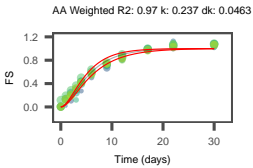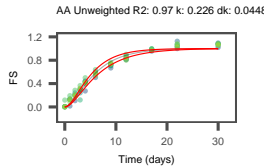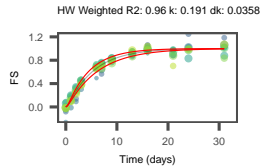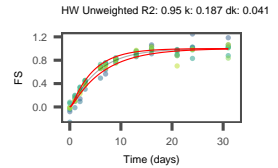

PROD

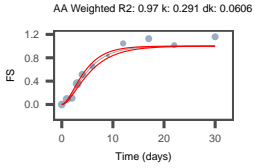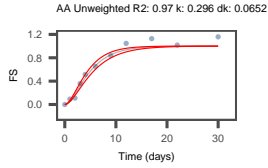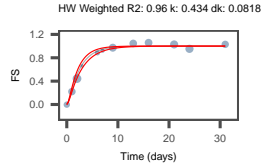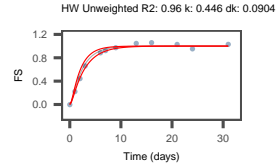

PROF1

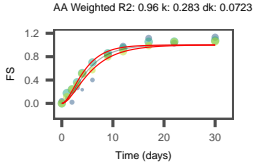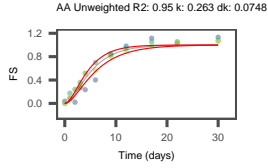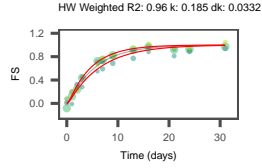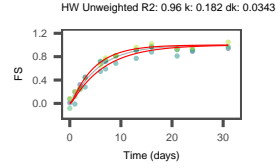

PRRC1

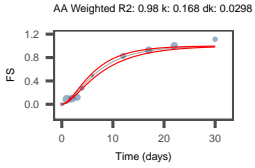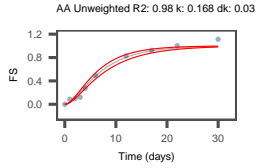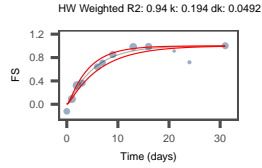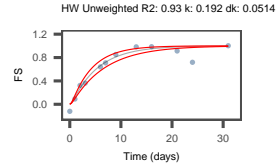

PSA1

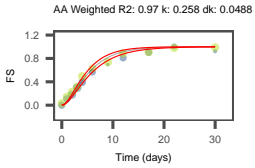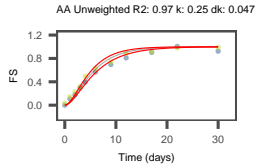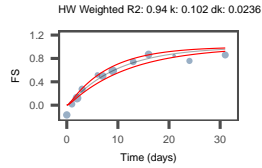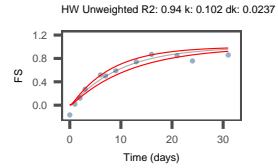

PSA2

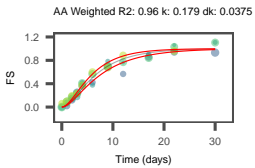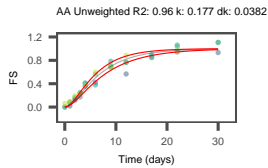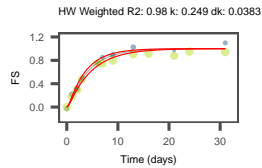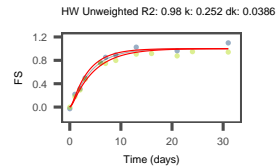

PSA4

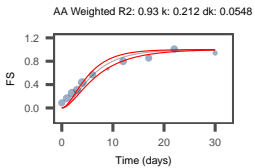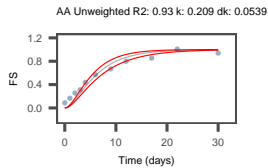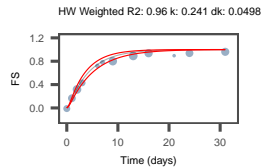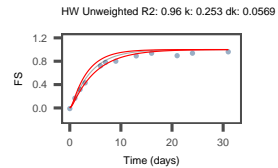



## PSA6

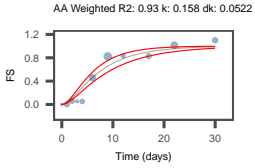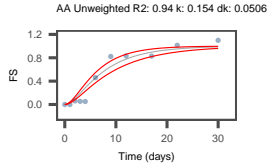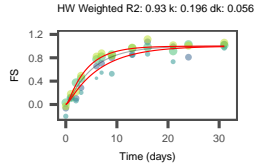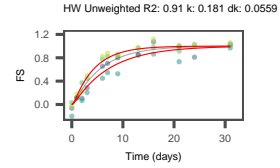

## PSB4

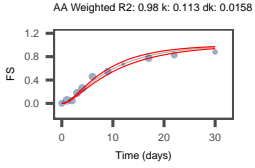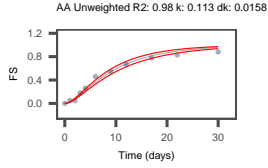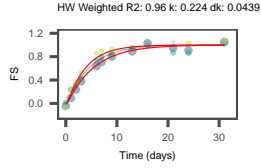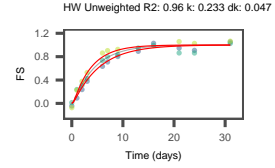

## PSB5

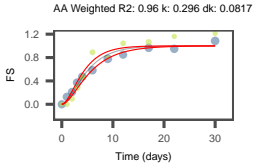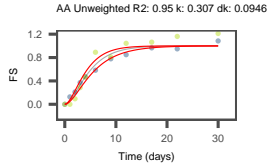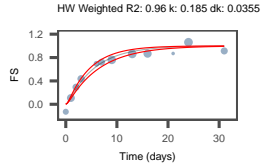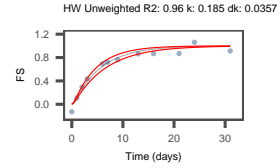

## PSD11

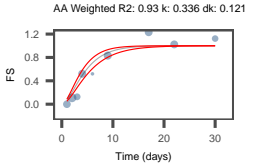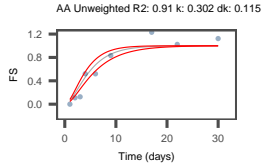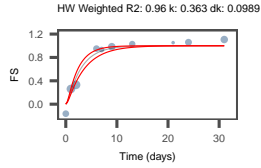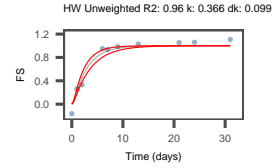

## PSMD2

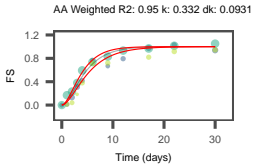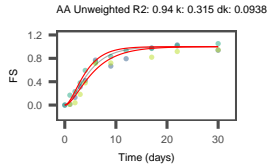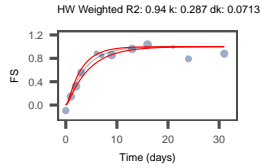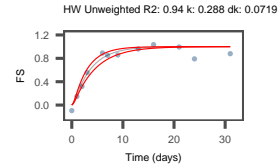

## PSMD6

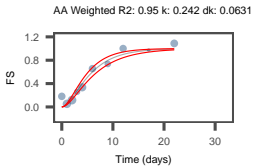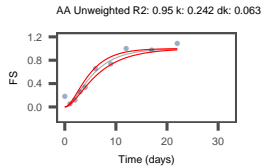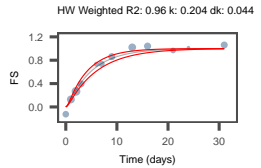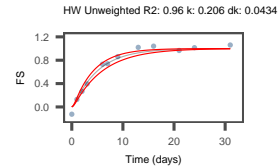

## PSME1

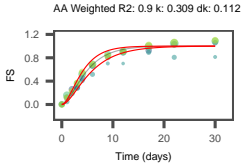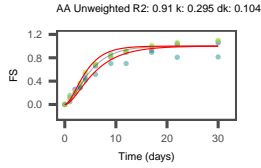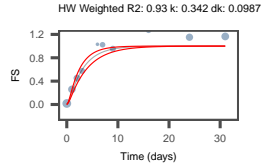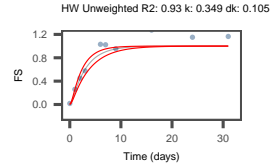

## PTBP1

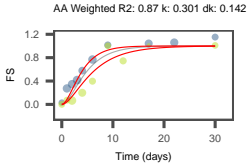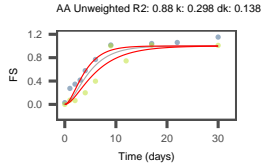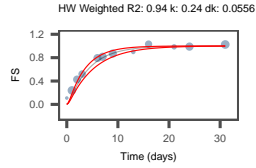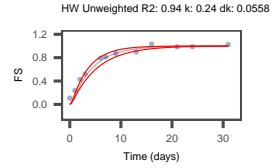

## PTER

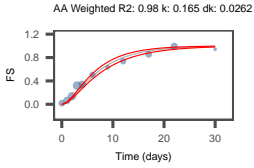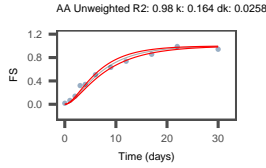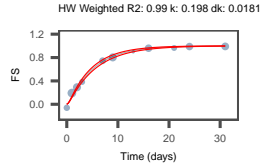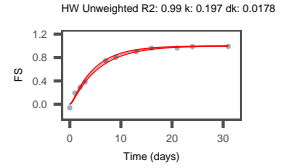

## PTGR3

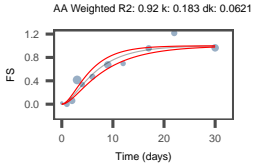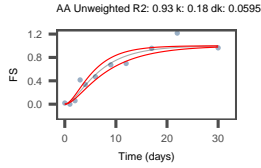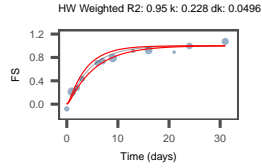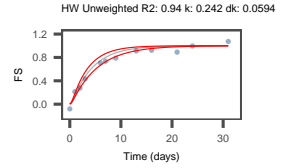

## PTH2

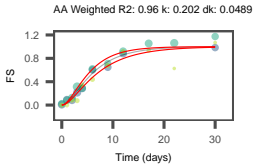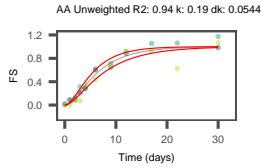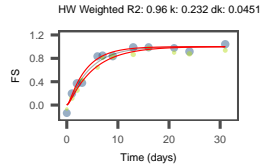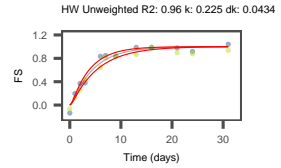

## PURA

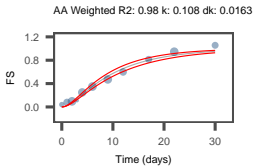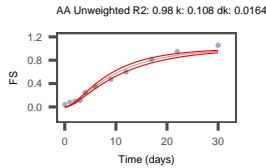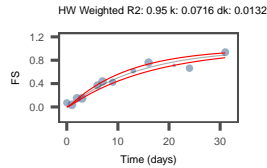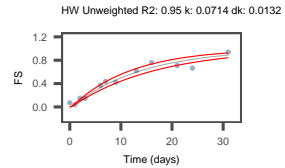

## PXMP2

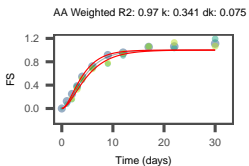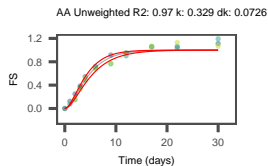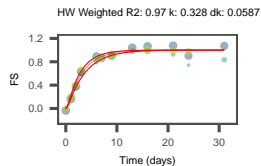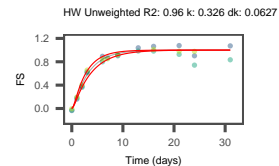

## PXMP4

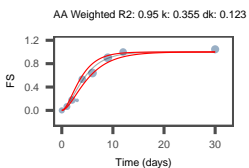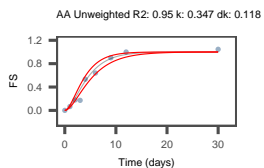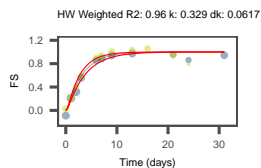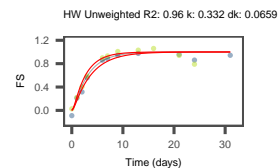

## PYC

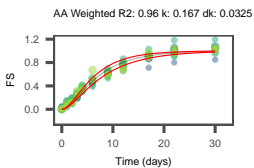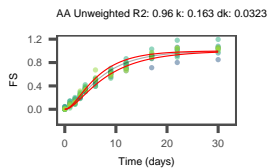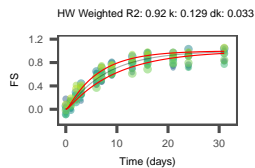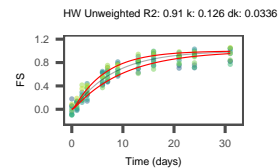

## PYGL

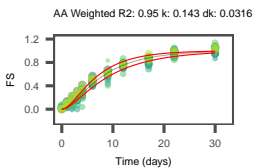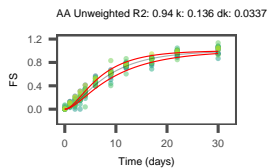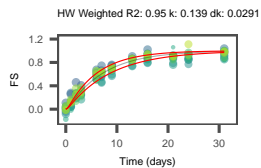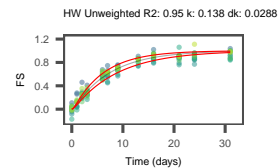

## QCR1

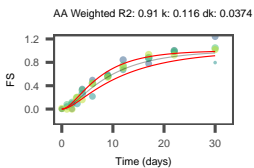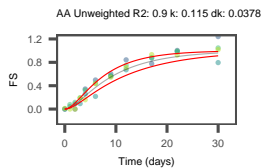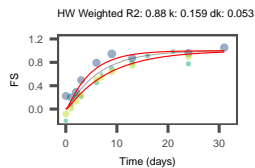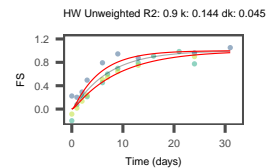

## QCR10

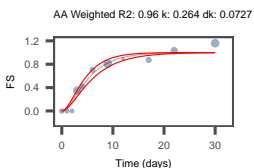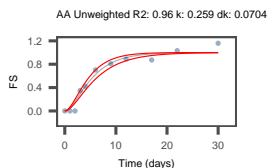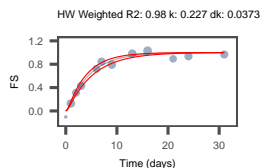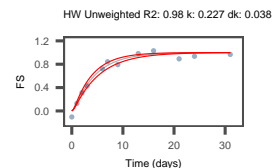

## QCR2

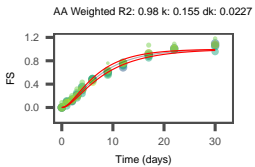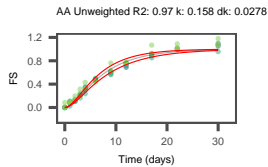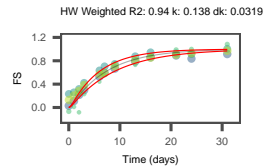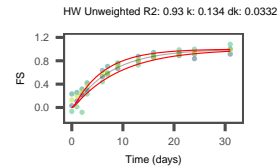

## QOR

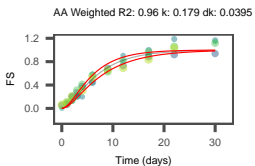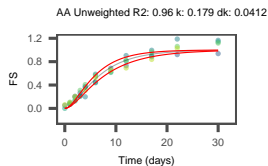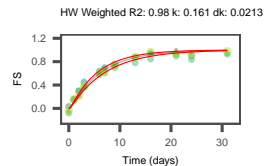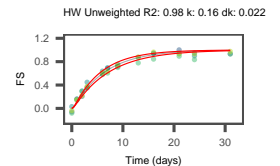

## RAB18

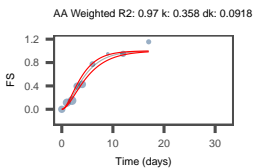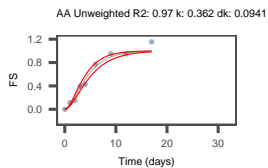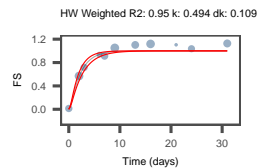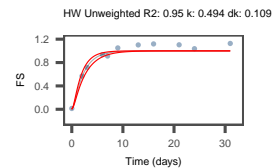

## RACK1

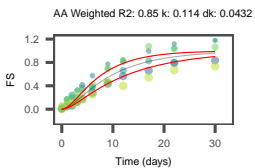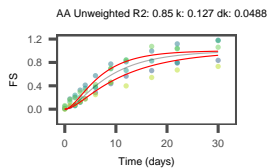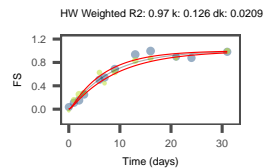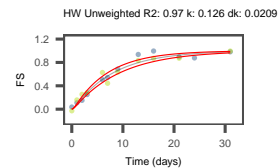

## RADI

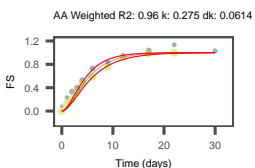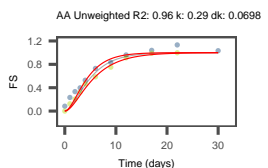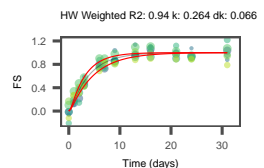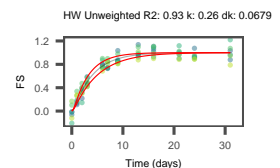

## RDH7

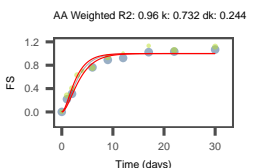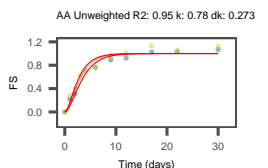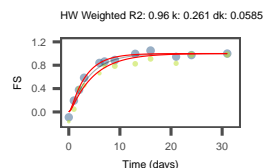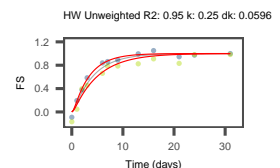

## REEP5

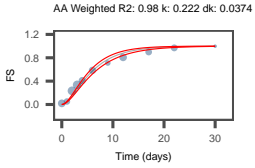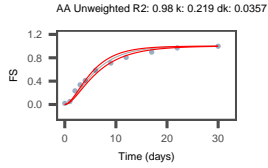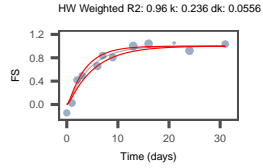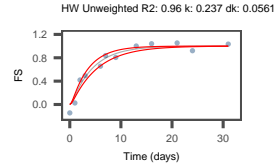

## RENT1

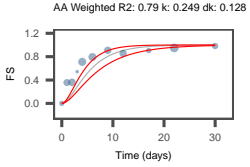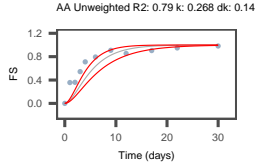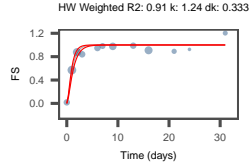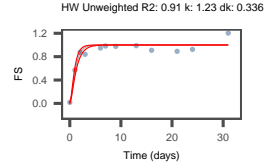

## RGN

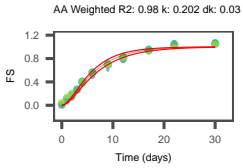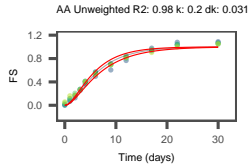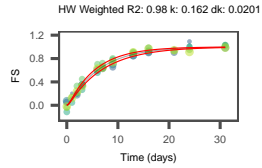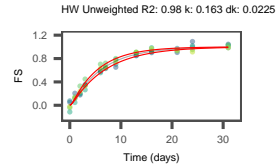

## RHOA

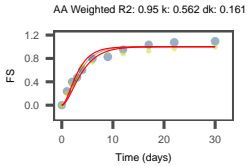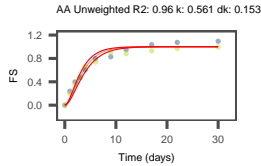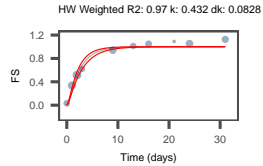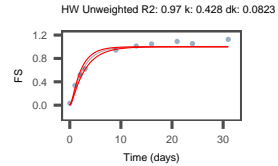

## RIDA

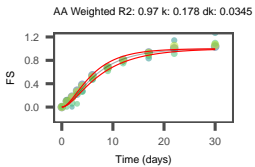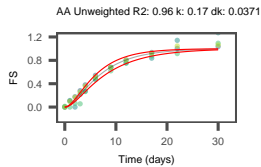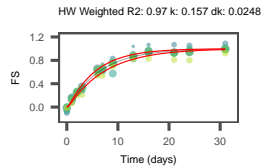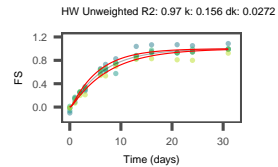

## RINI

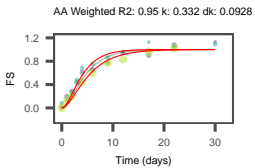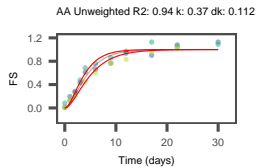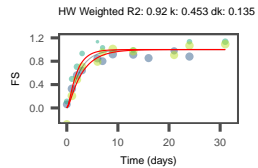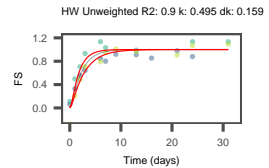

RISC

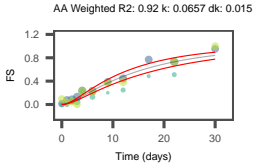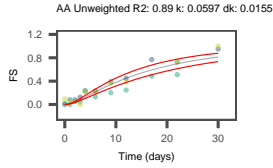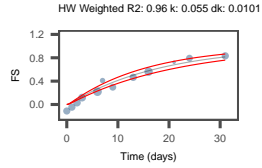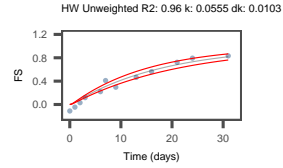

RL10

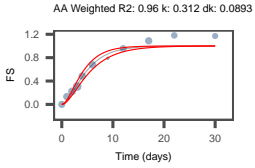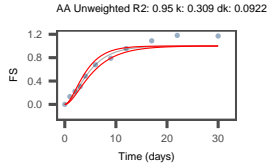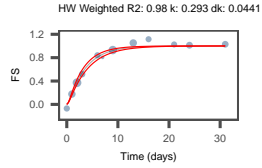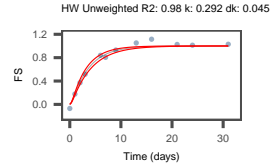

RL11

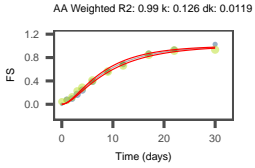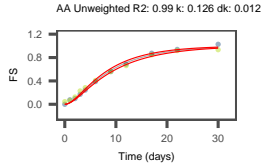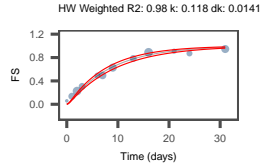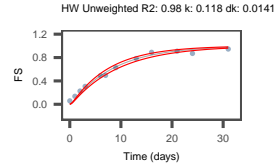

RL12

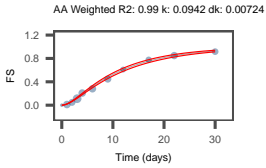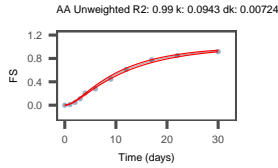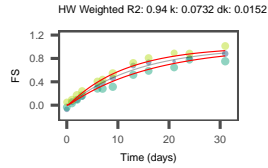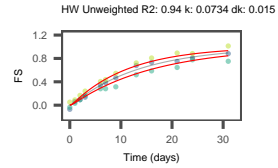

RL13A

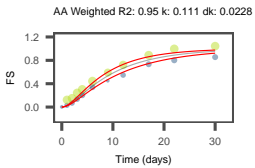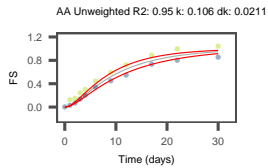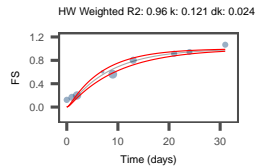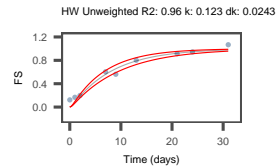

RL14

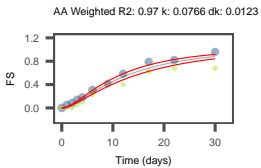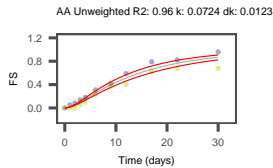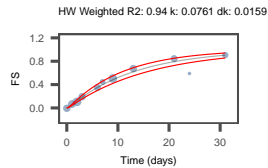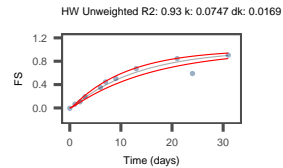

RL15

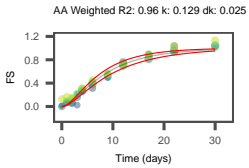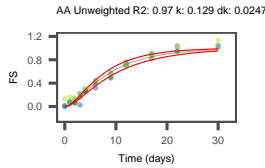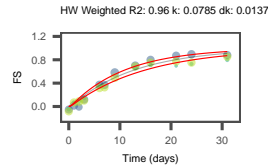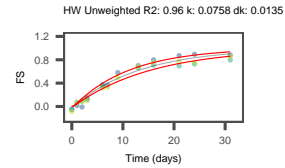

RL17

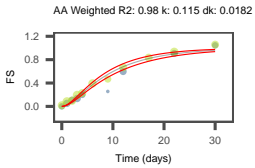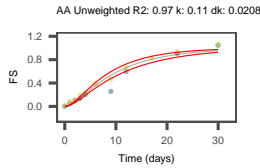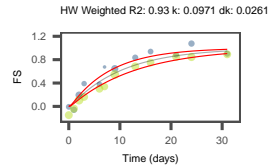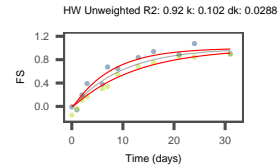

RL18

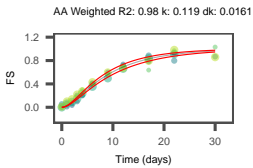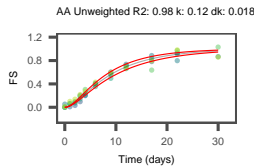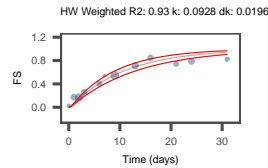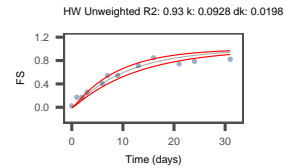

RL18A

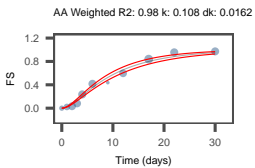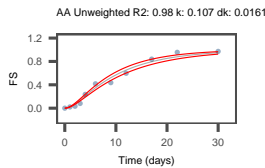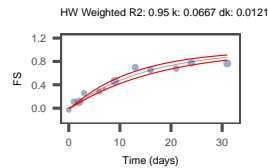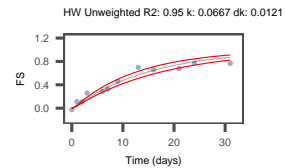

RL23

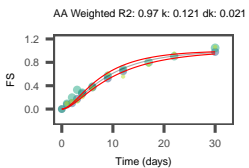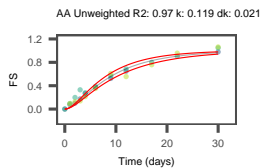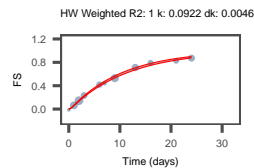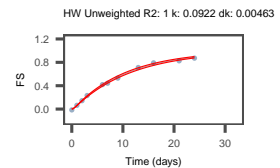

RL23A

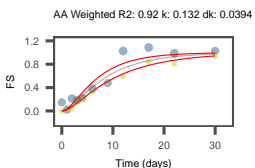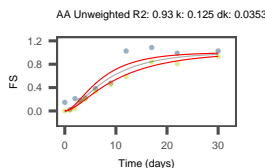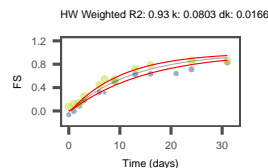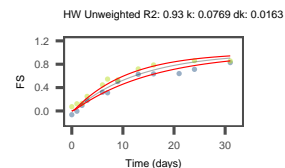

RL26

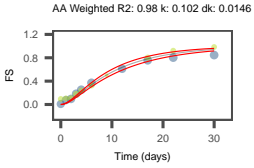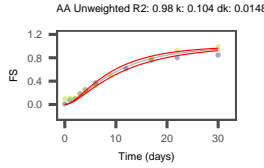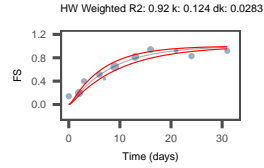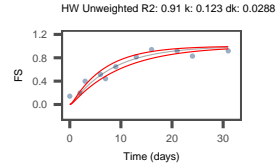

RL27A

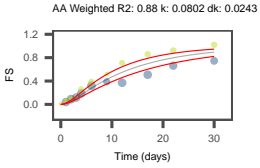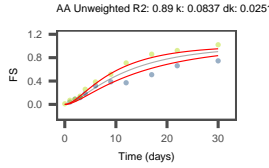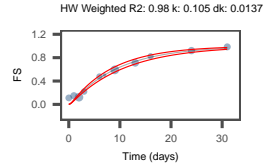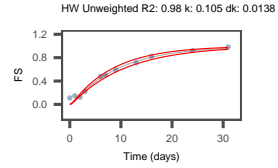

RL28

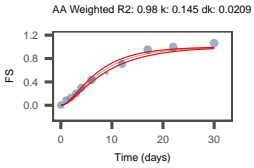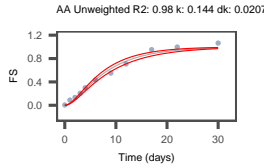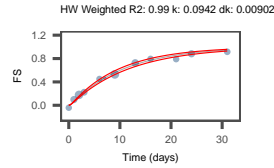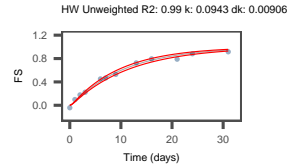

RL3

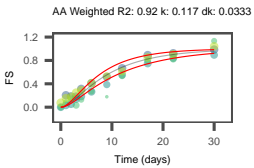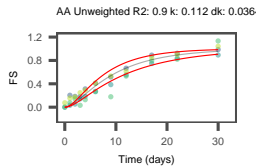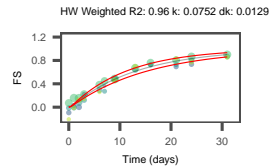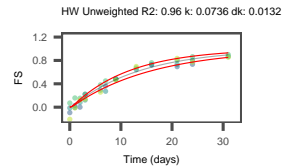

RL30

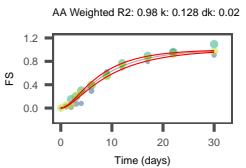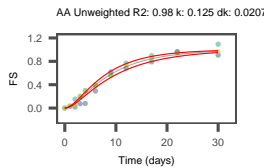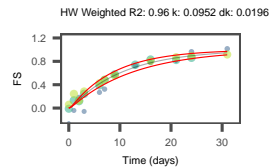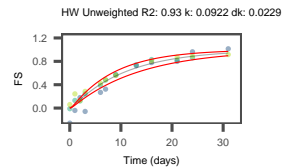

RL31

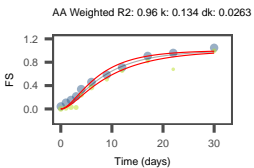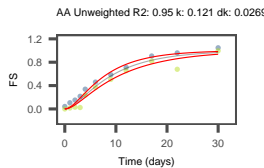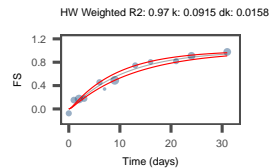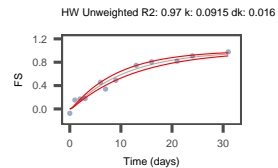



RL32

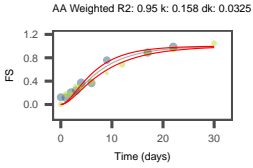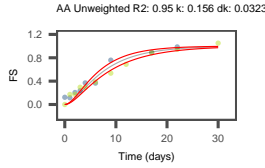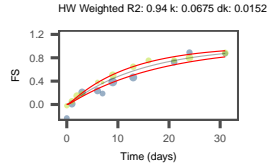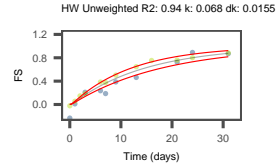

RL35

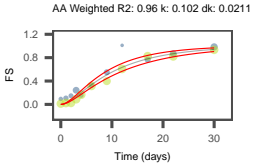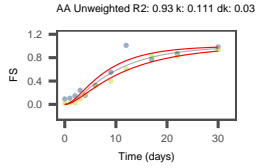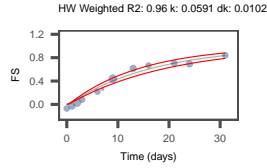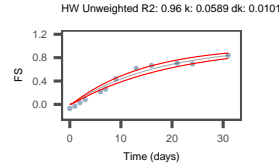

RL35A

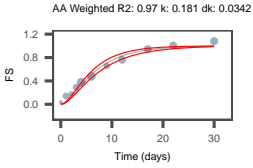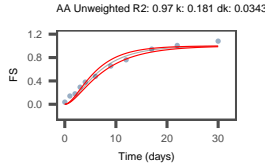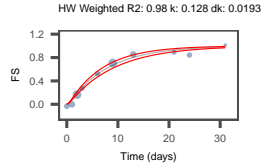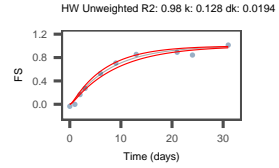

RL36A

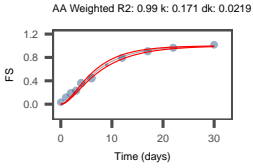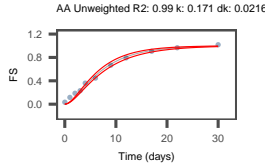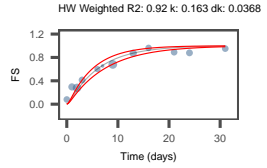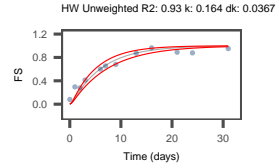

RL37A

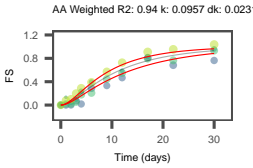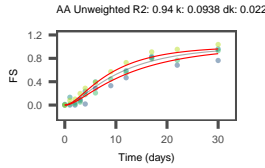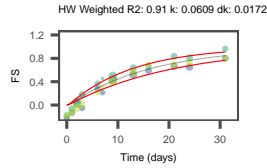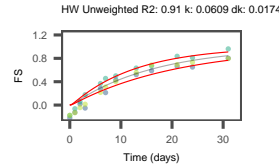

RL38

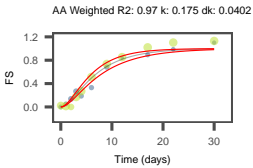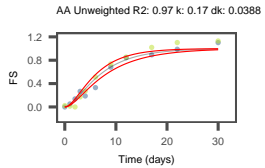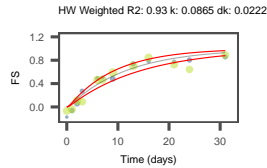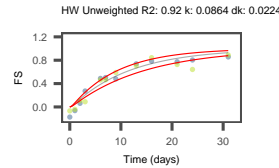

RL4

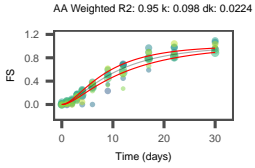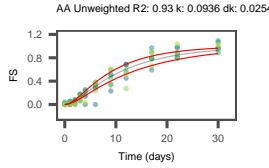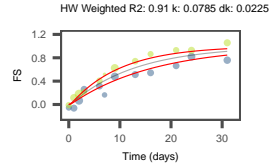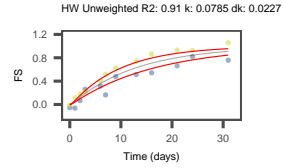

RL5

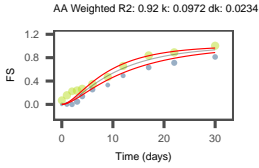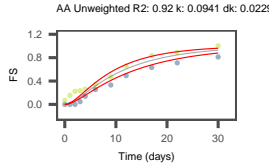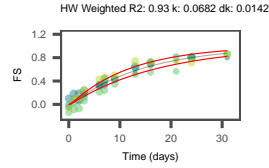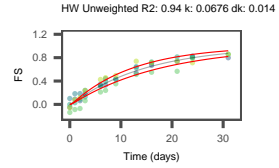

RL7

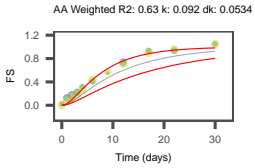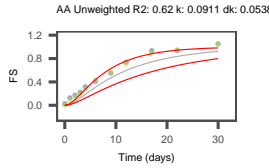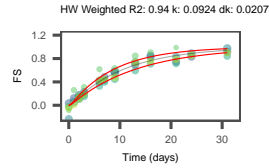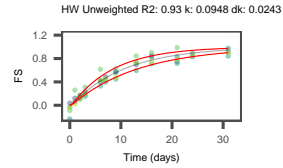

RL7A

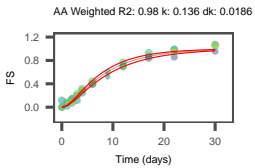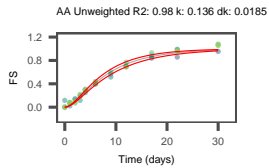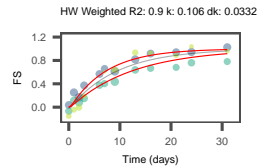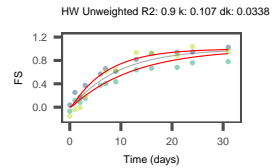

RL8

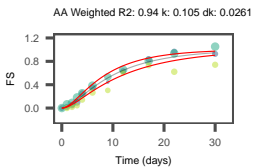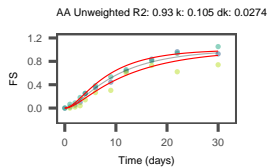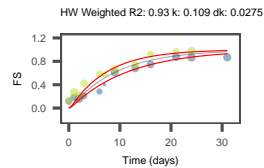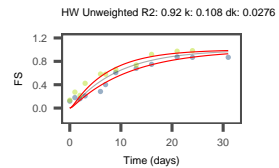

RL9

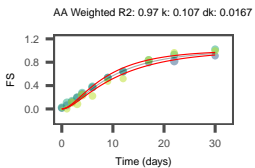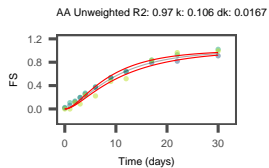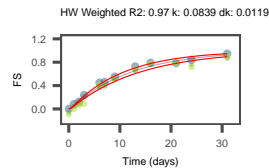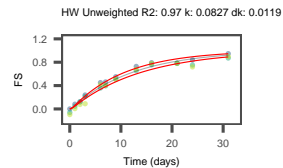

## RLA0

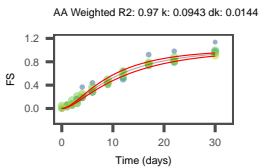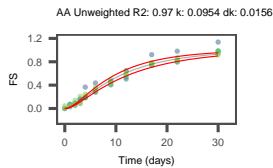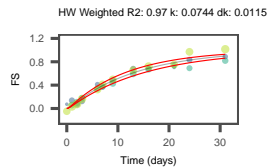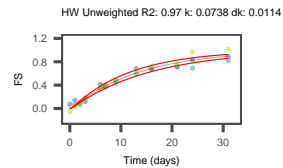

## RLA1

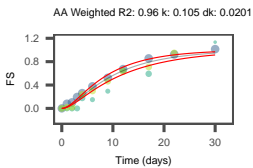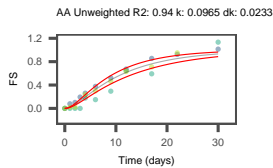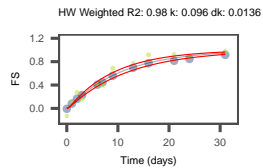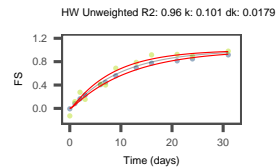

## RLA2

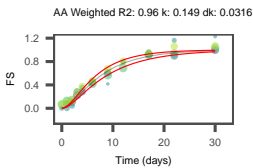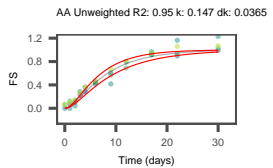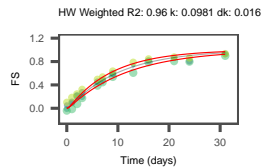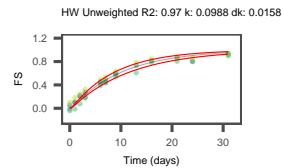

## RMD1

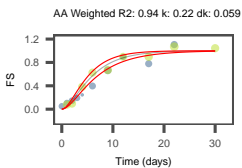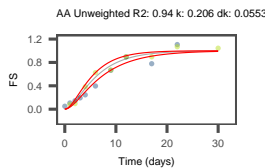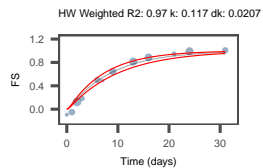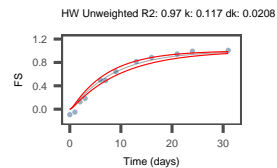

## RMD2

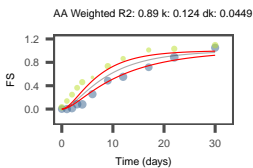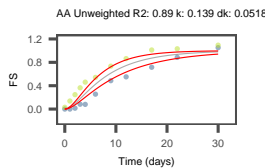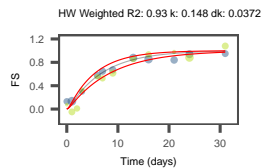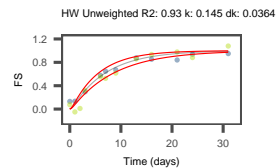

## RMD3

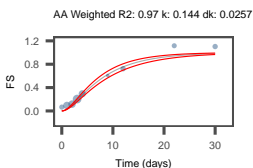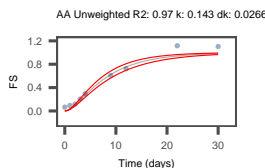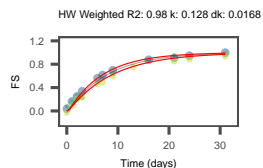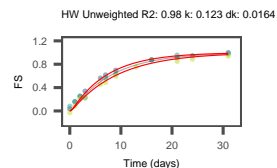

## ROA2

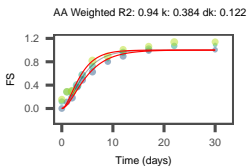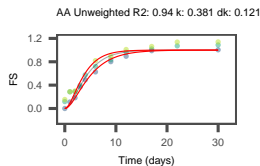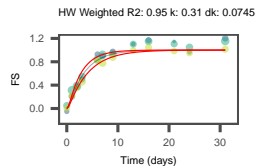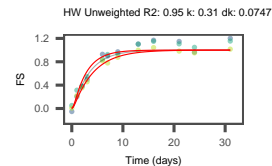

## ROA3

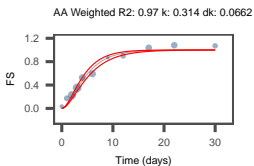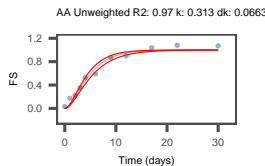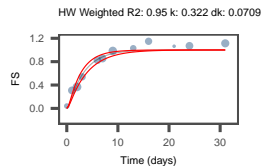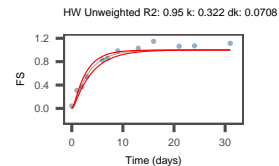

## ROA4

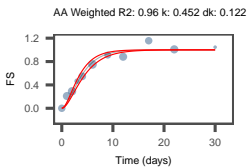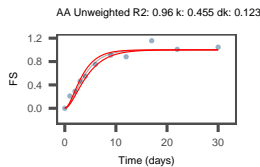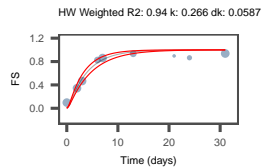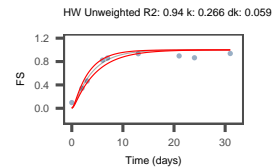

## RPN1

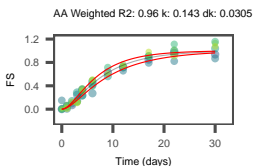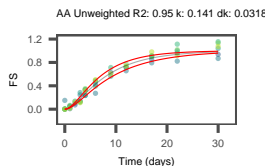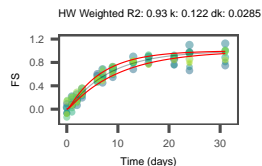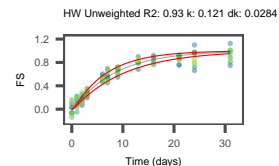

## RPN2

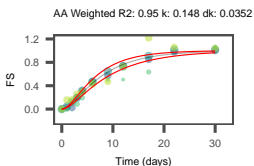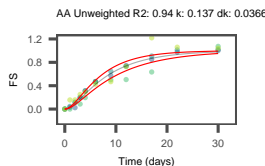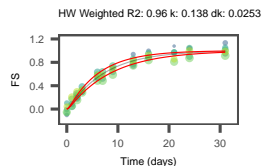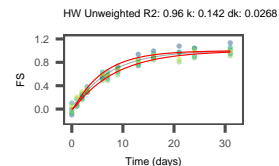

## RRBP1

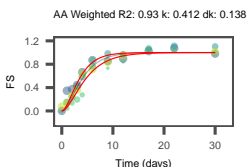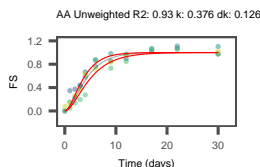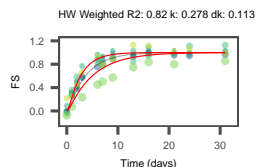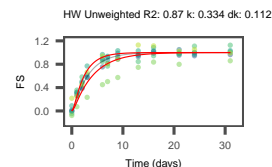

RS10

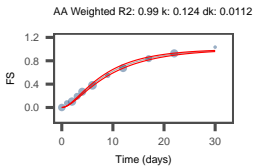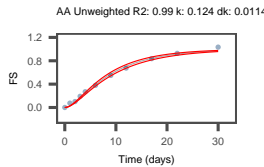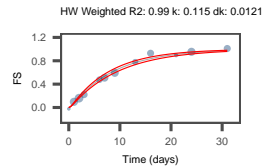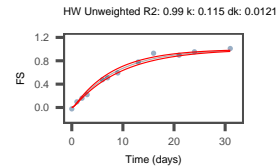

RS11

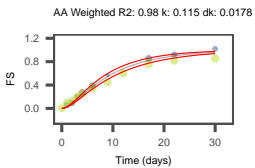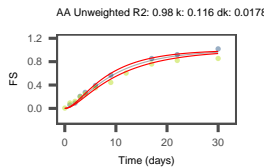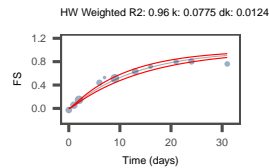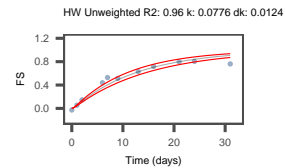

RS12

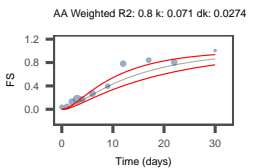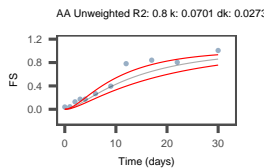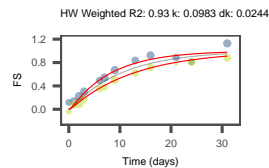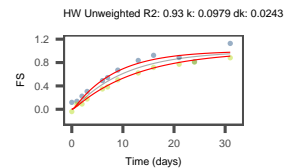

RS13

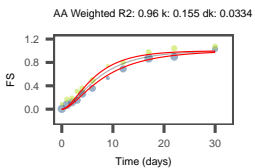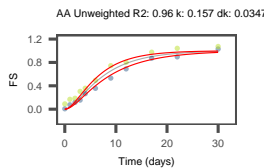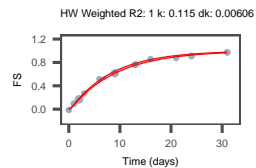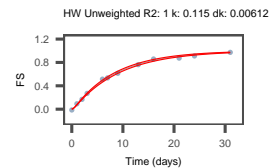

RS15

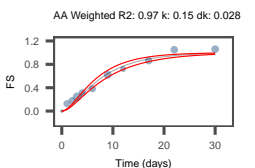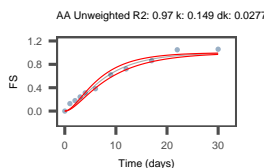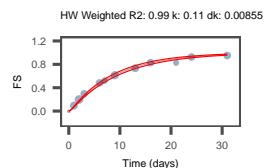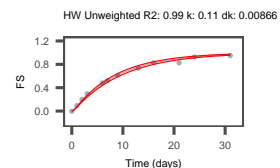

RS16

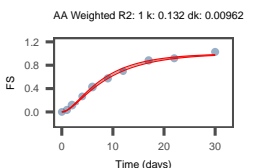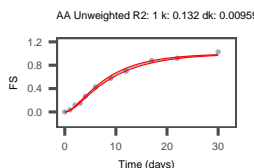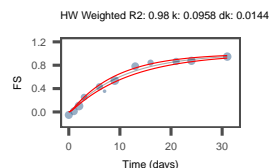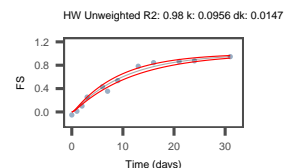

RS17

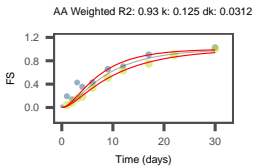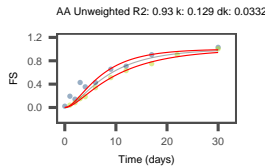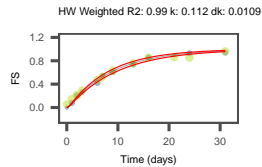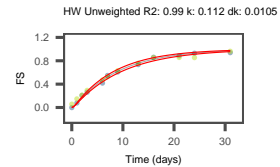

RS18

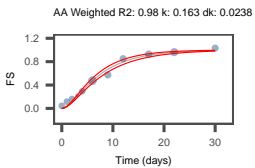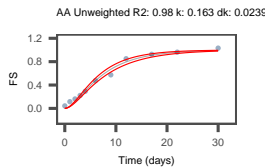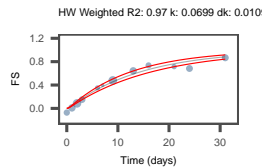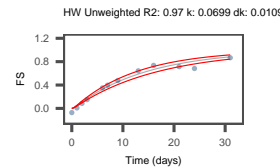

RS19

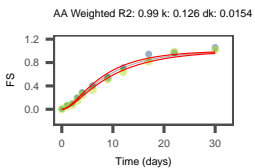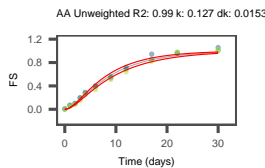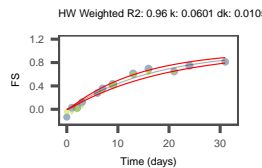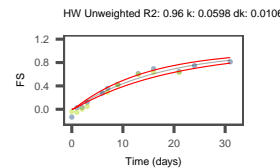

RS2

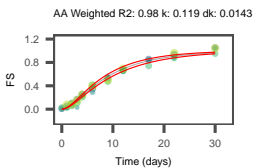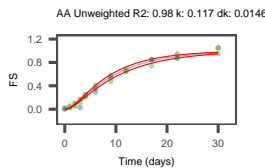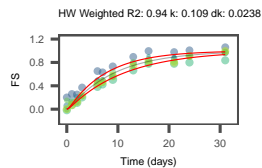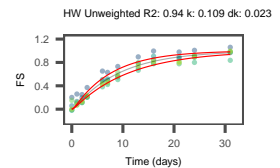

RS20

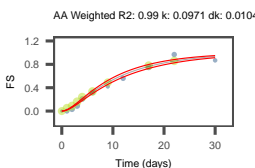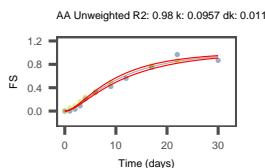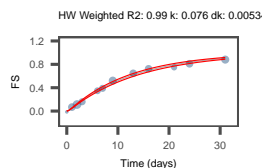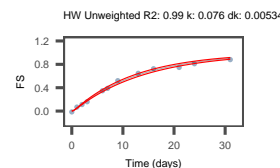

RS23

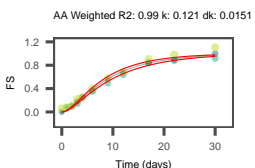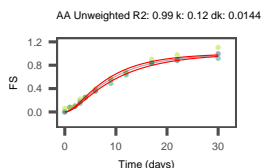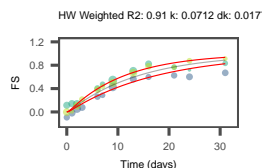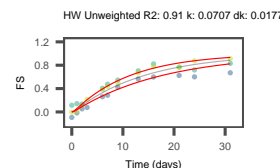

RS25

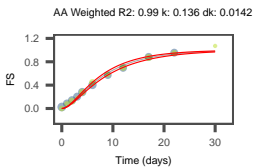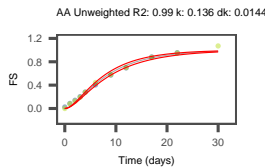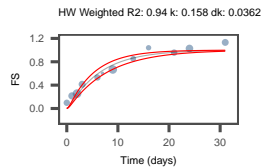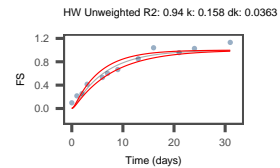

RS26

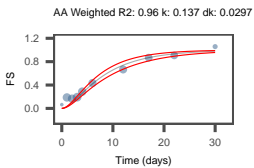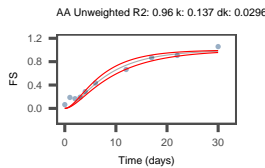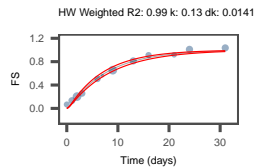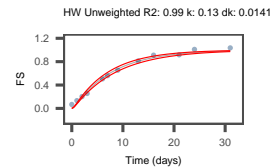

RS3

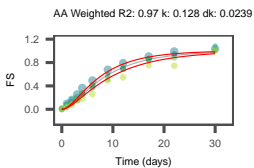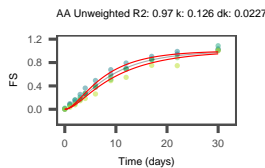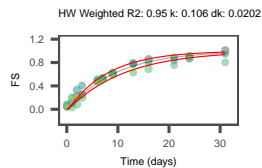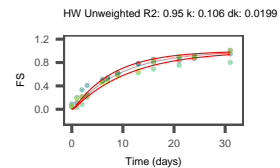

RS4X

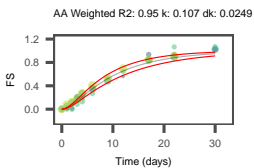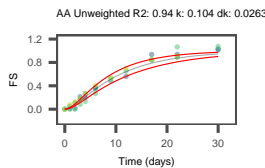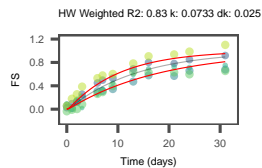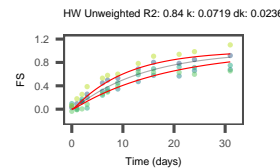

RS5

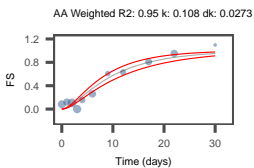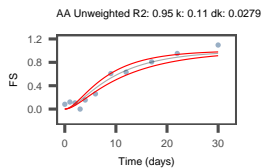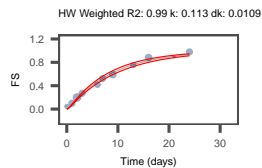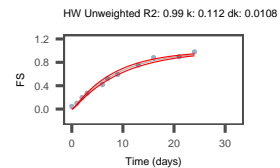

RS6

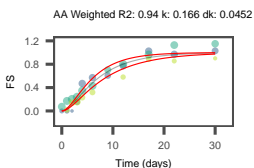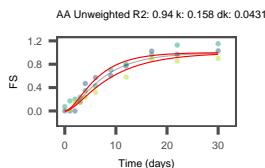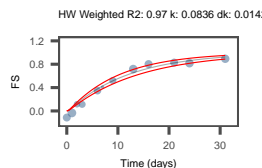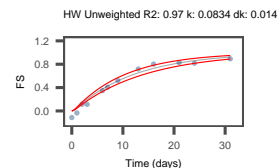

RS7

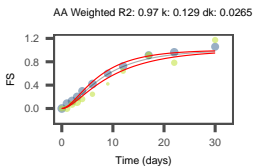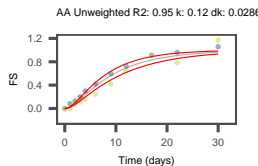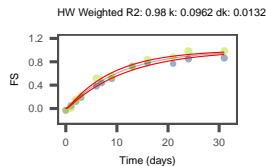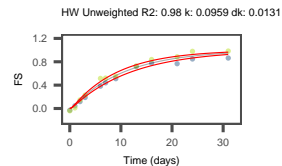

RS8

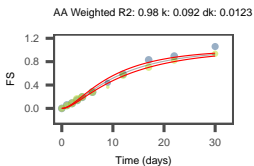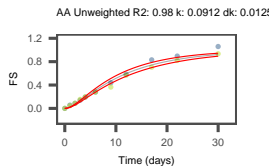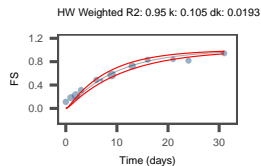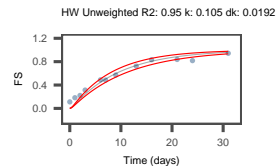

RSSA

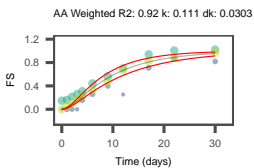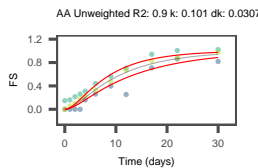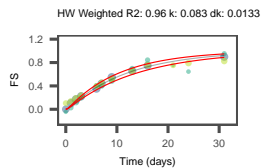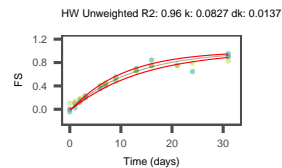

S10A1

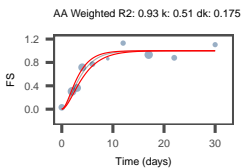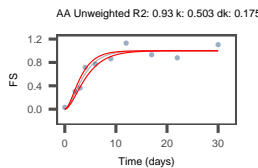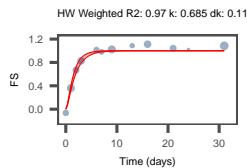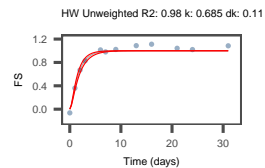

S14L2

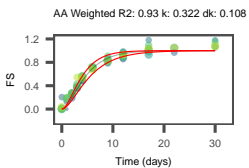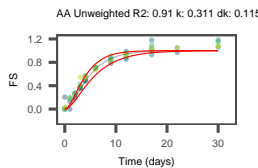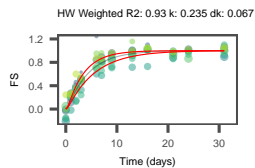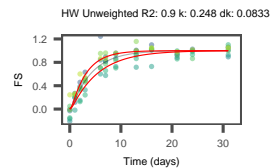

S14L4

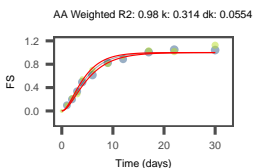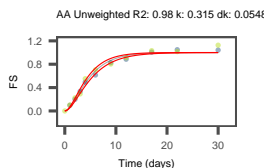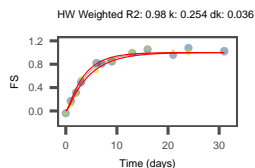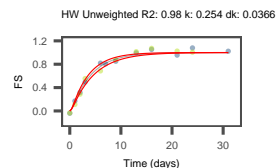



## S27A2

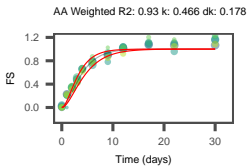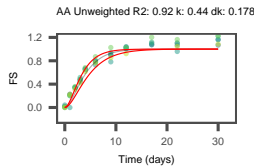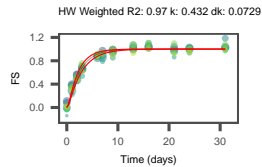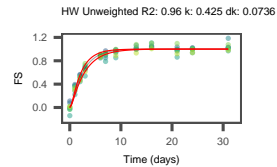

## S27A5

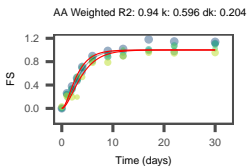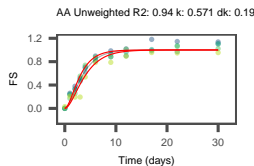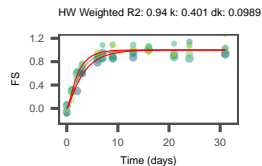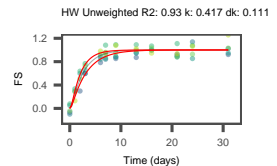

## SAHH

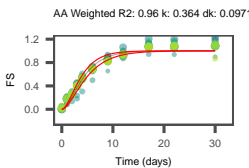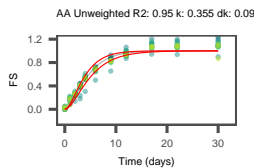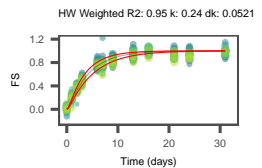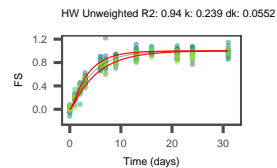

## SAMH1

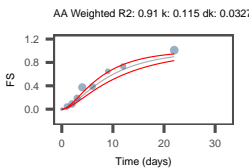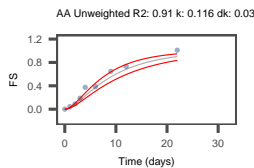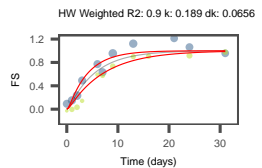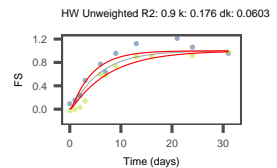

## SAP

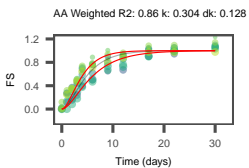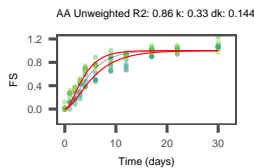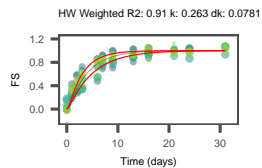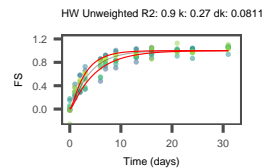

## SARDH

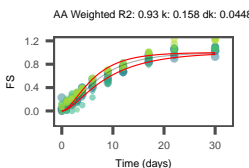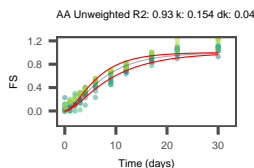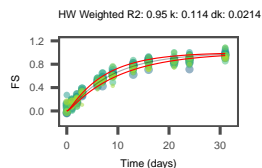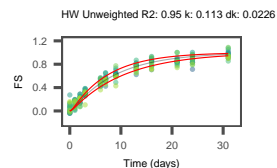

## SBP1

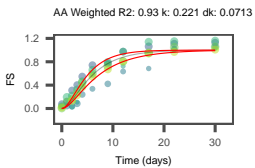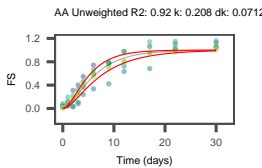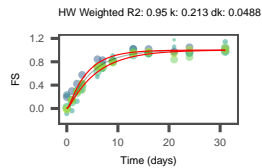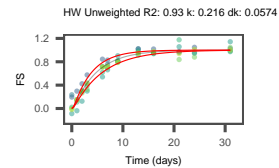

## SC22B

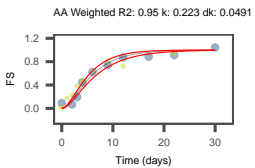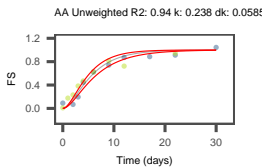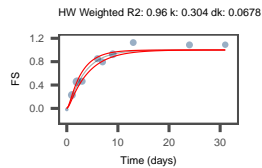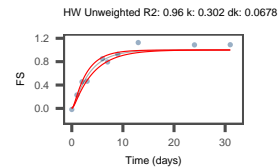

## SC23A

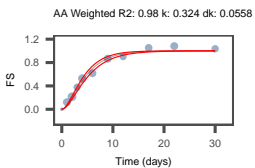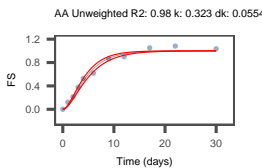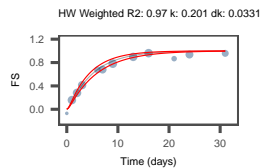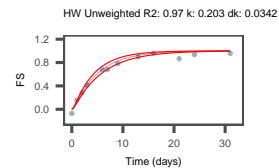

## SC24A

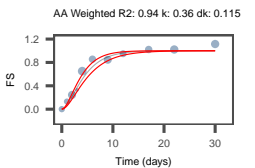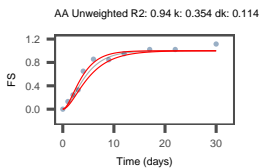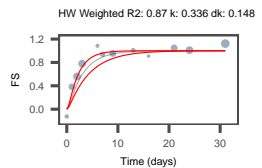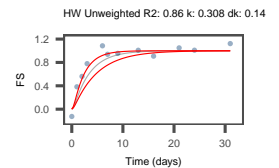

## SC31A

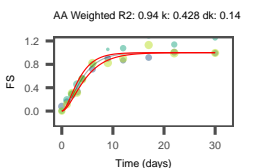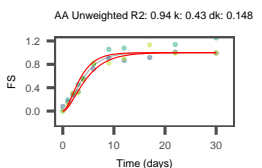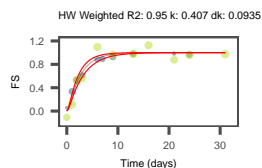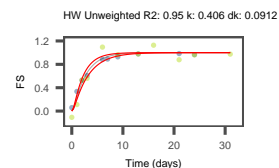

## SCP2

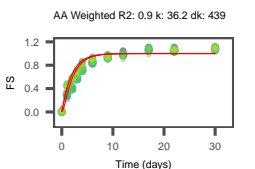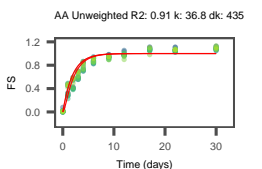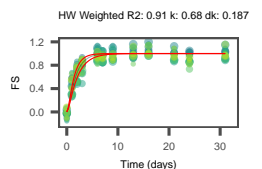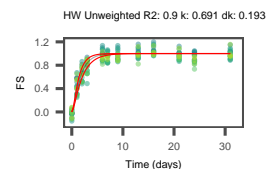

## SDHA

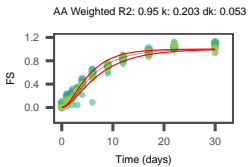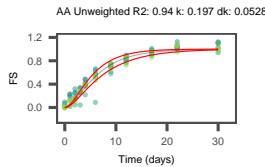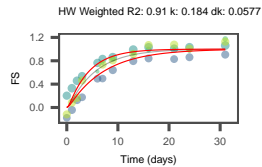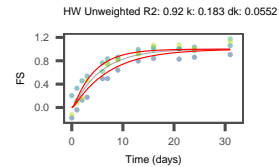

## SDHB

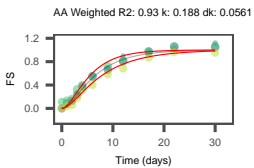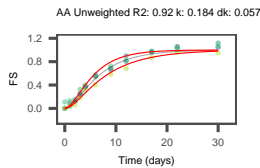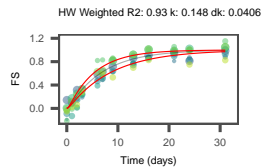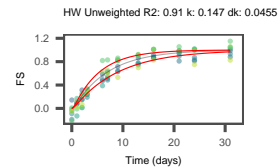

## SDHL

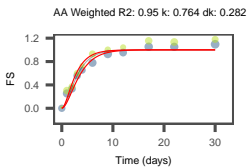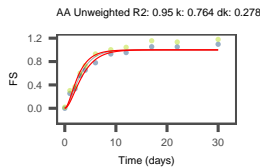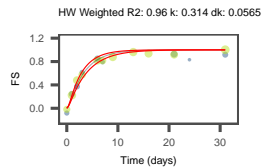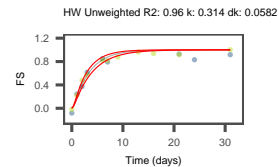

## SF3B1

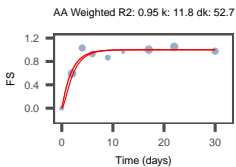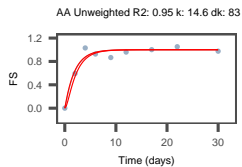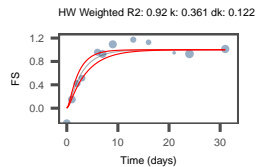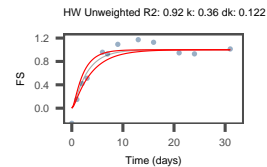

## SFXN1

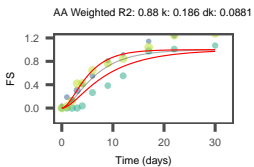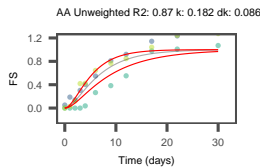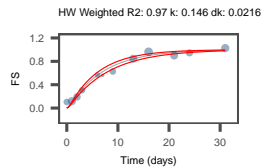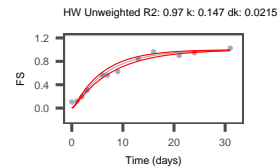

## SGMR1

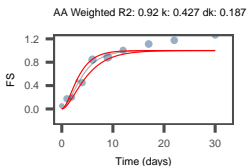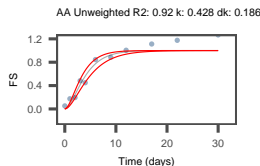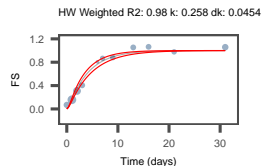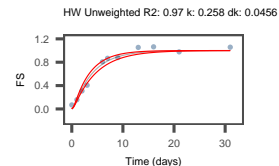

**SMD1**

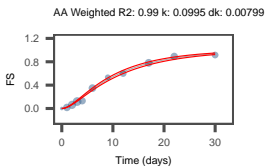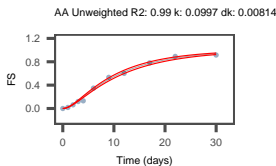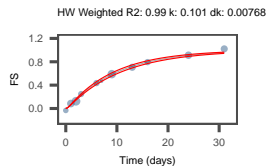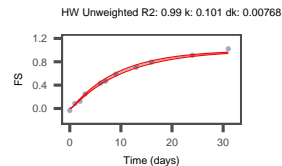

**SMD3**

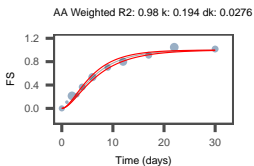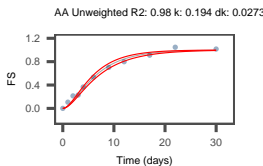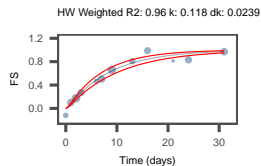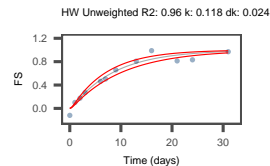

**SODC**

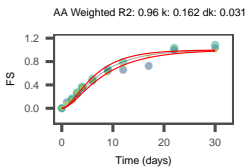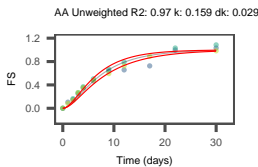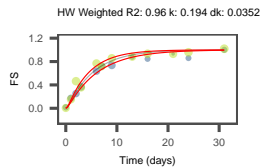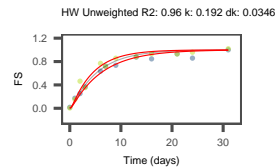

**SODM**

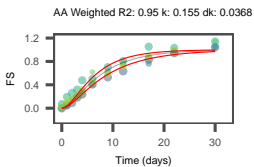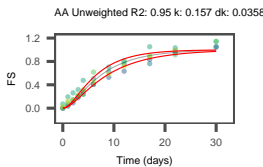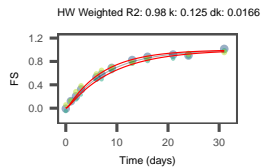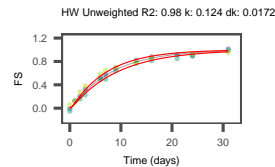

**SOX**

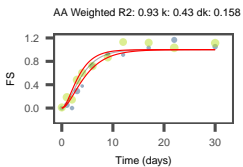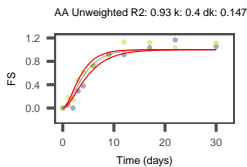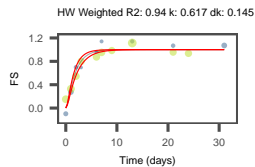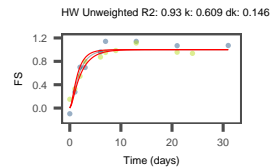

**SPEB**

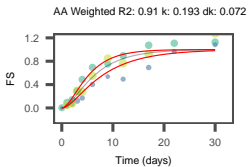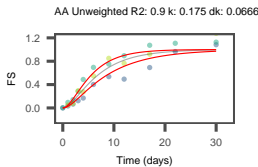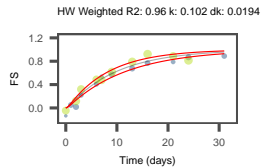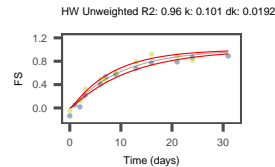

SPRE

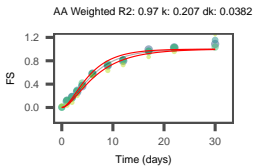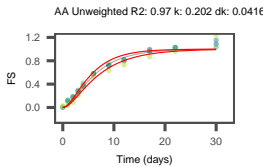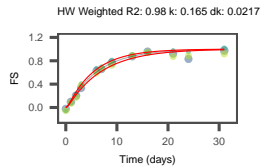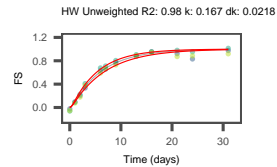

SPS1

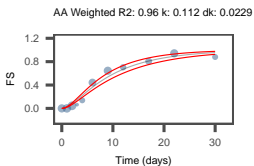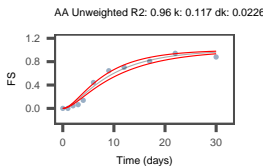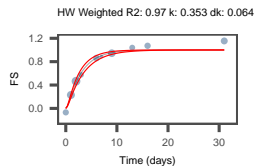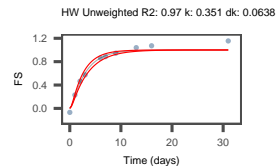

SPS2

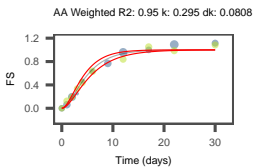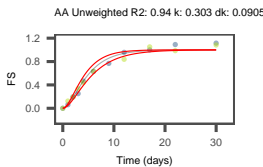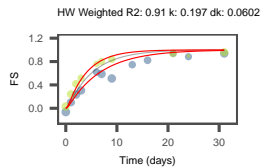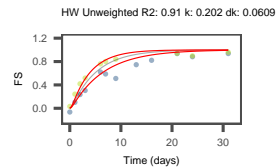

SPTN1

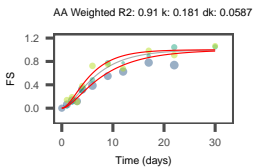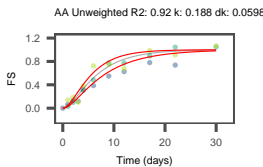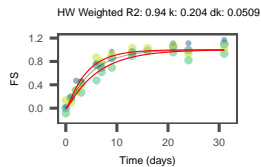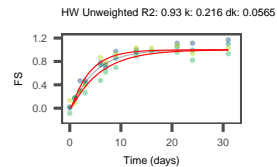

SRC8

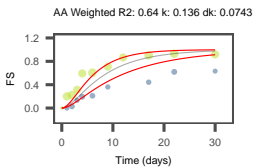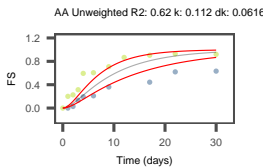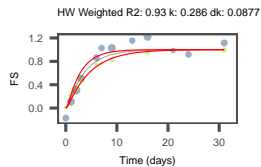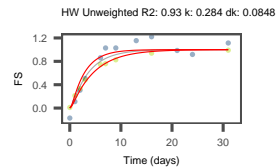

SSDH

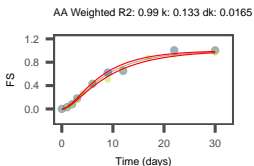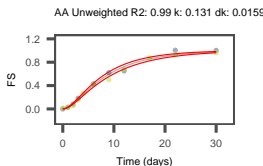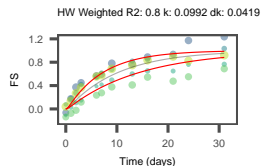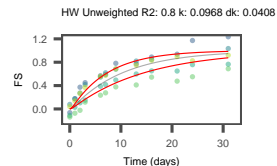

## ST1A1

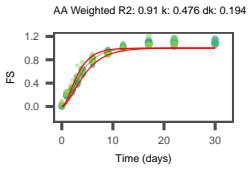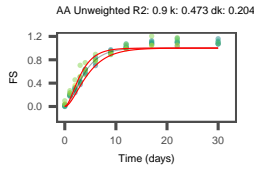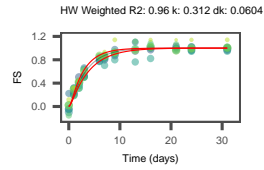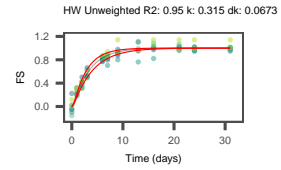

## ST1D1

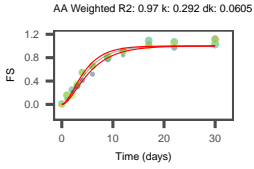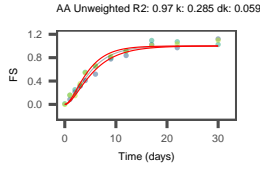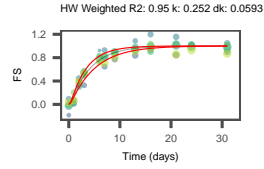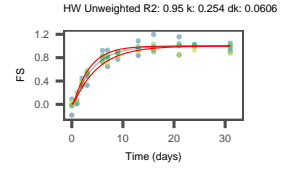

## STA10

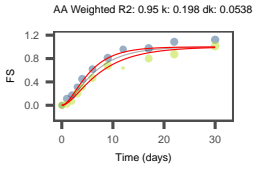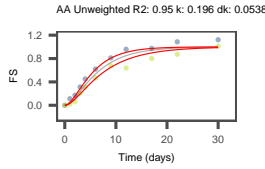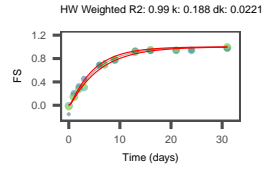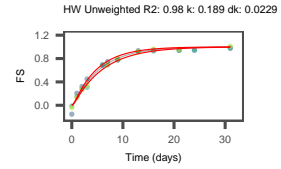

## STIP1

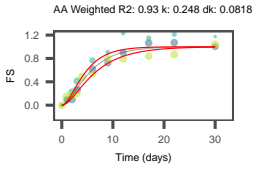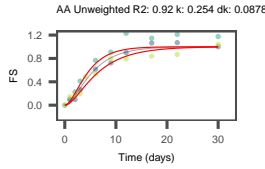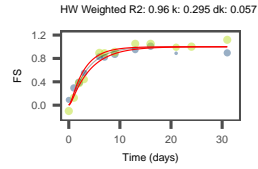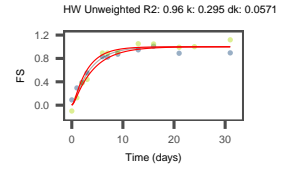

## STML2

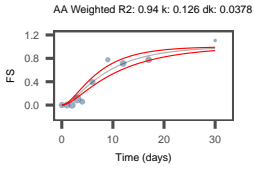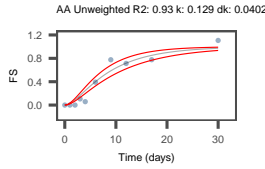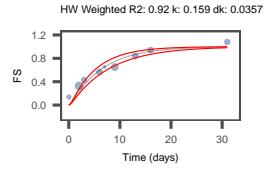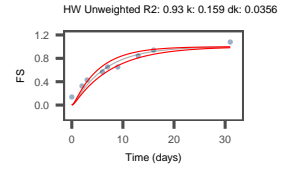

## STT3A

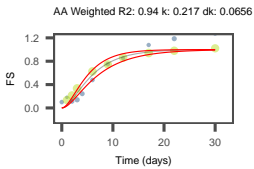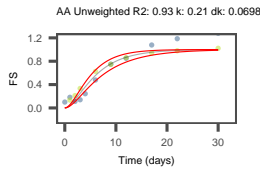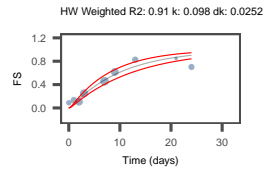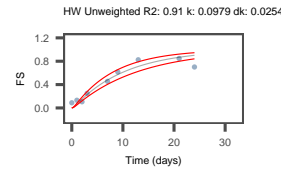

SUCA

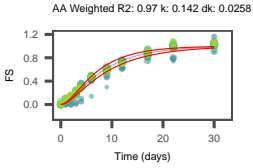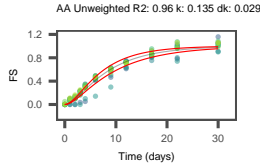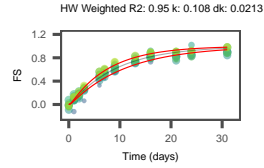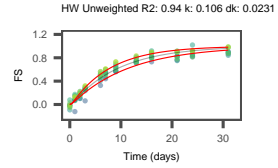

SUCB1

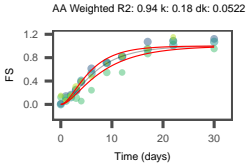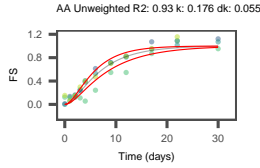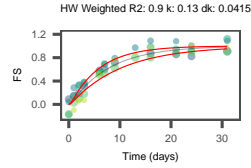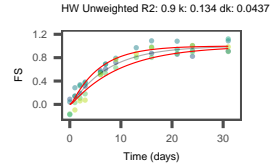

SUCB2

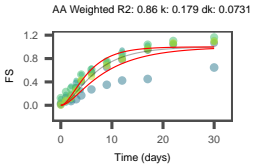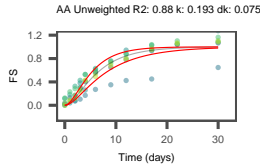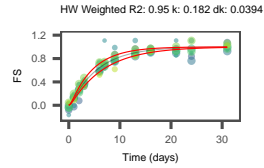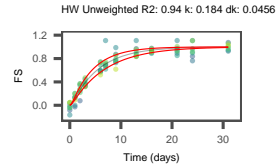

SUOX

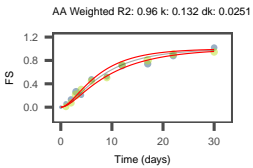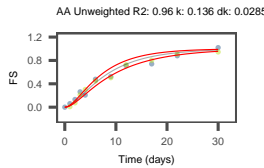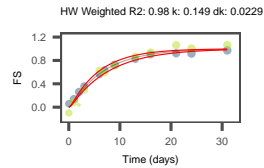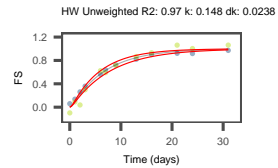

SYAC

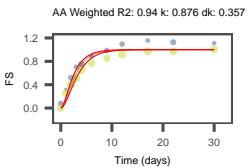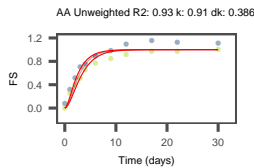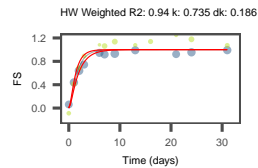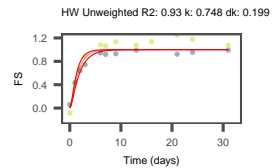

SYEP

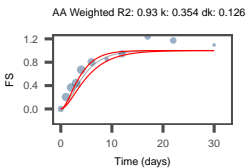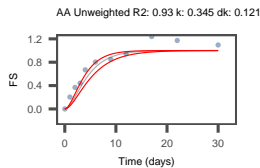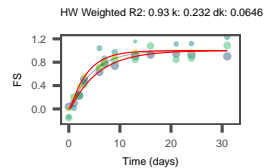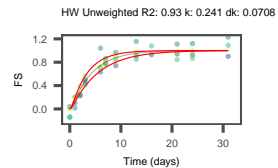

SYFB

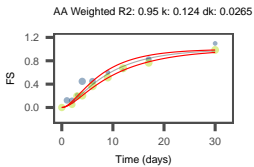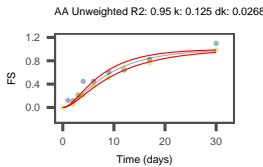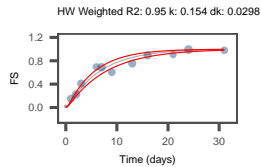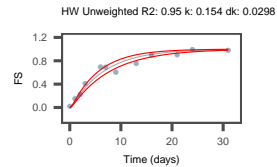

SYLC

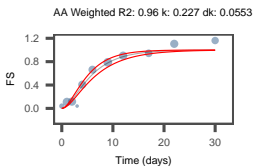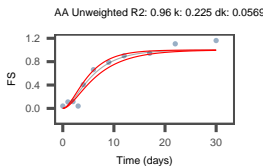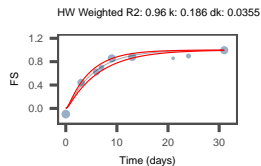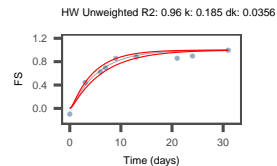

SYQ

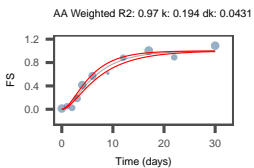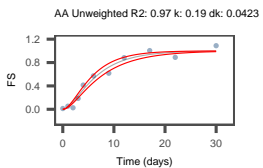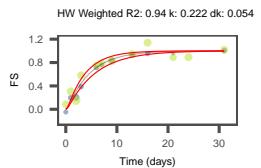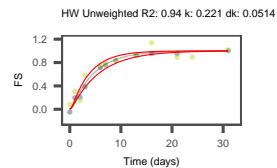

SYTC

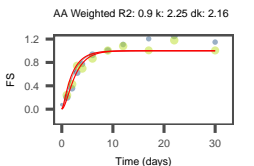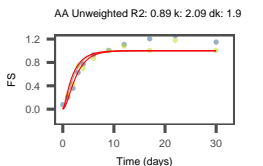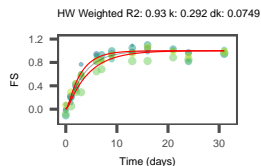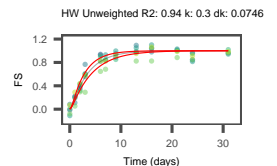

TADBP

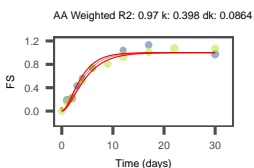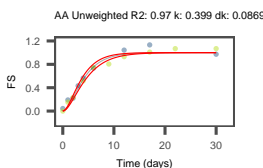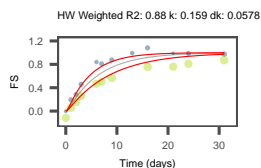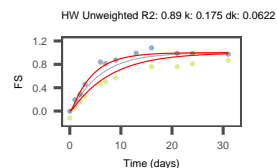

TALDO

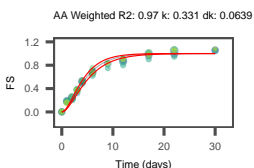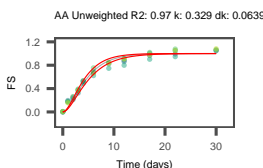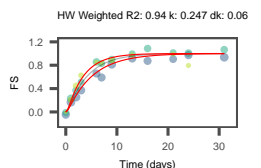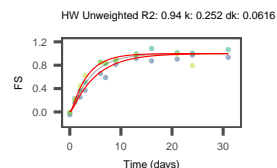



## TBA4A

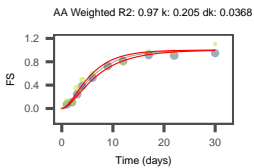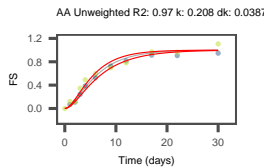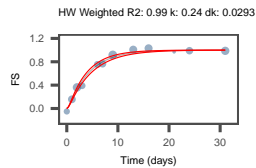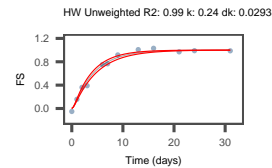

## TBB4B

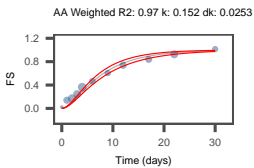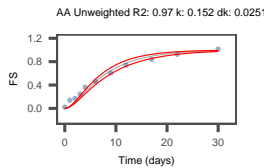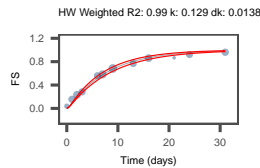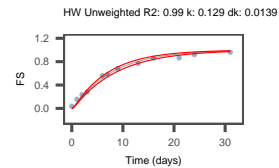

## TBB5

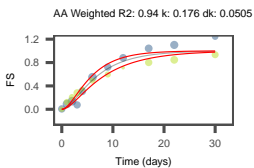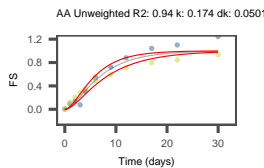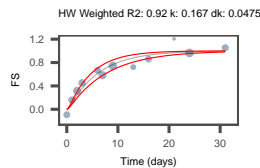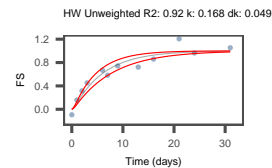

## TCPA

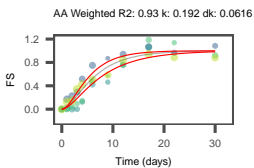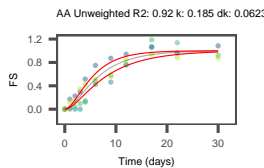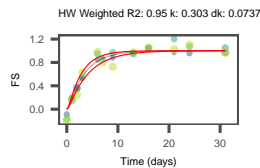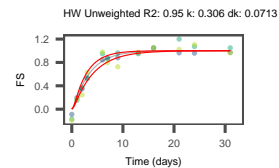

## TCPB

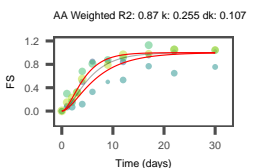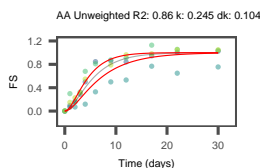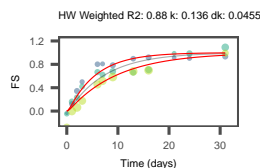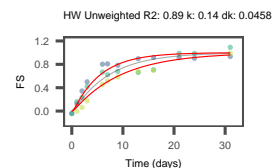

## TCPD

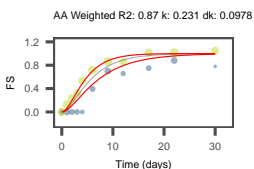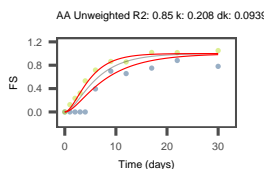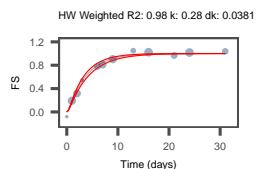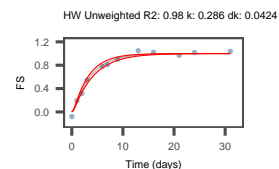

TCPE

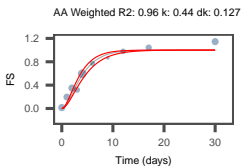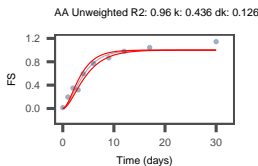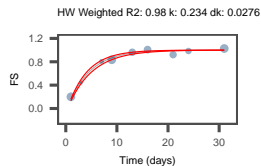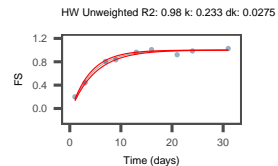

TCPG

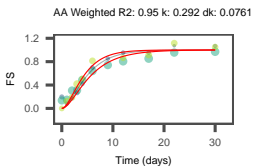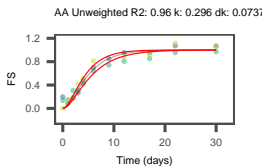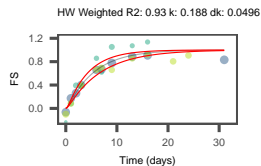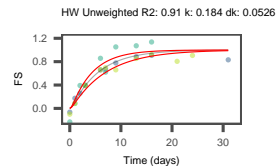

TCPH

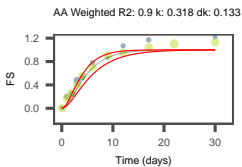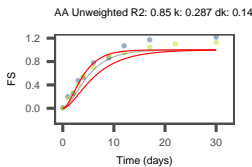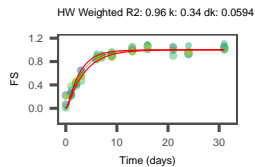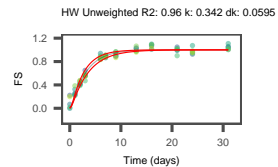

TCPQ

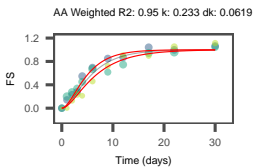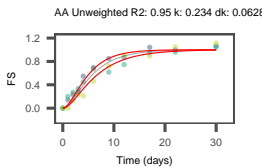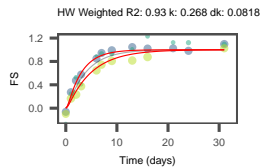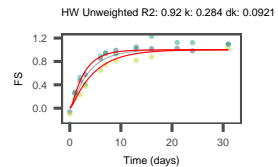

TCPZ

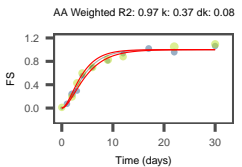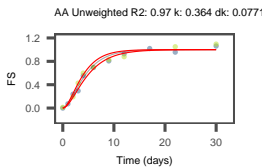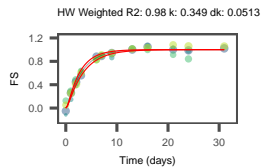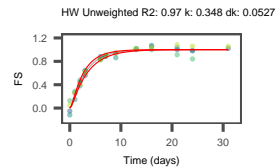

TERA

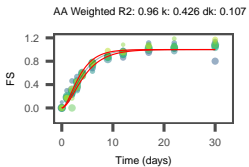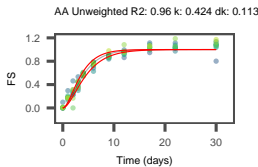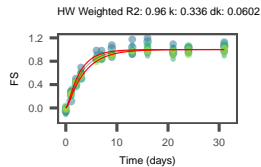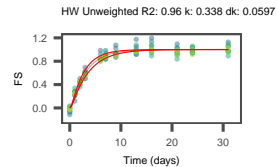

TGM2

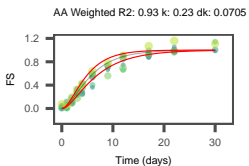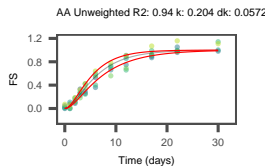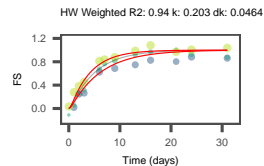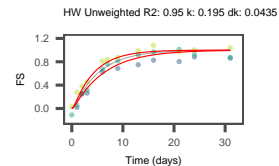

THIC

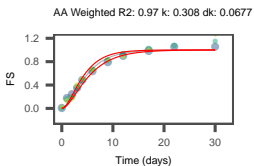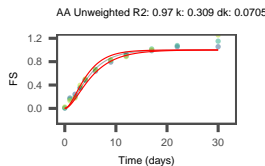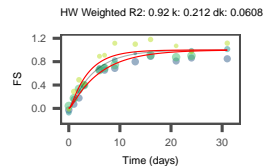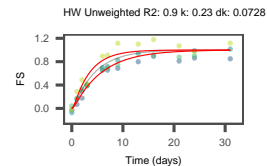

THIKB

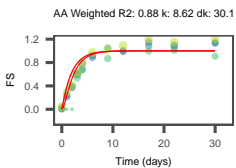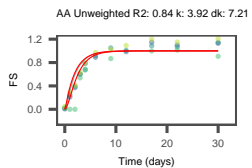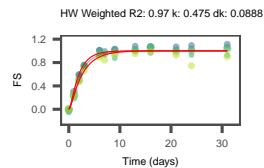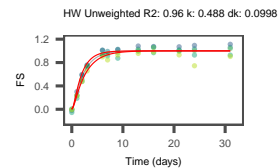

THIL

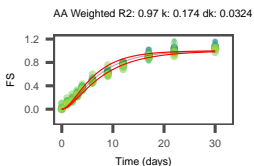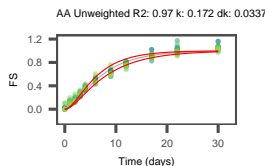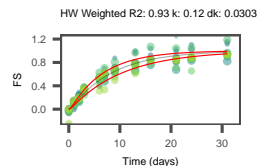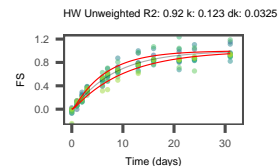

THIM

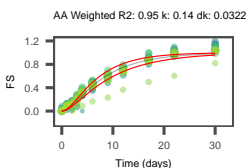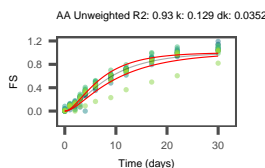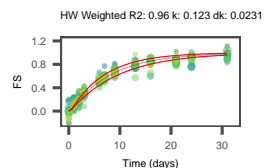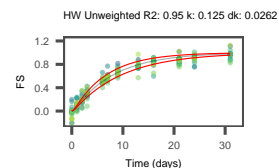

THIO

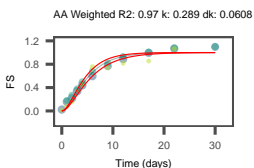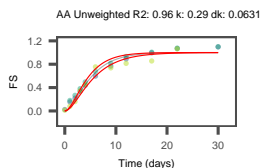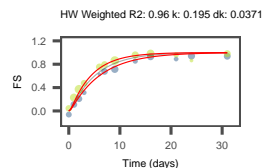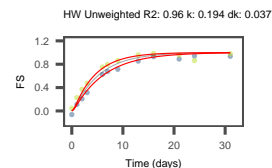

**THTM**

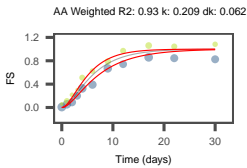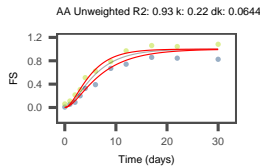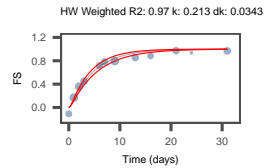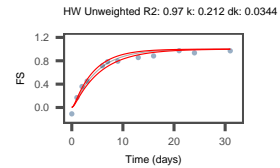

**THTR**

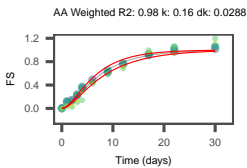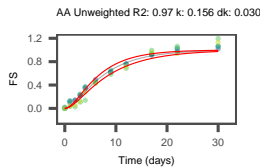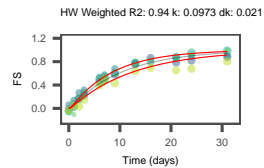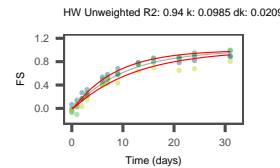

**TIAR**

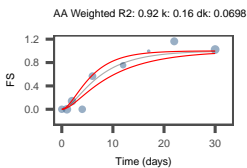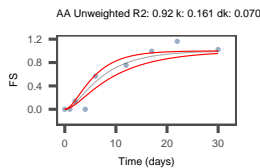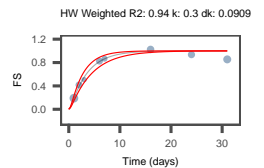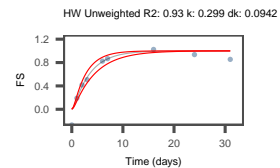

**TIM44**

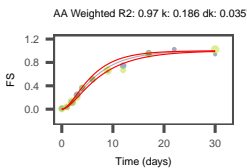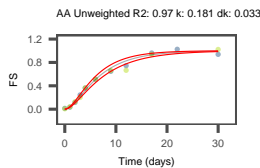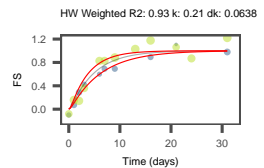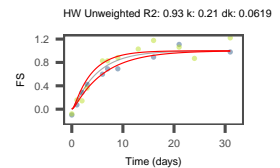

**TIM50**

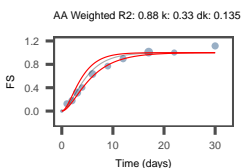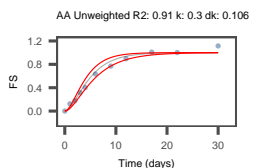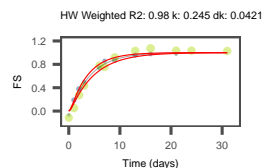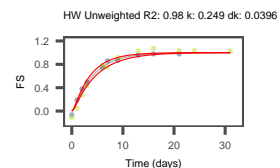

**TKFC**

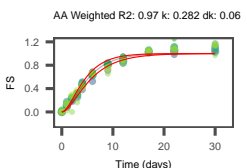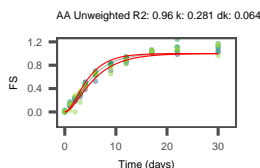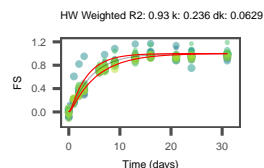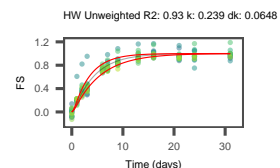

**TKT**

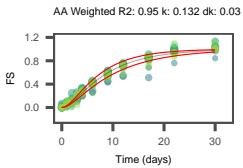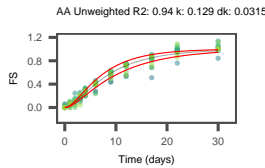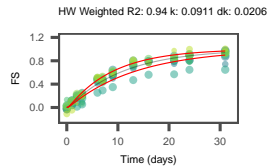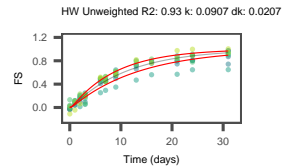

**TLN1**

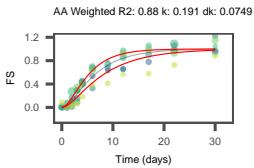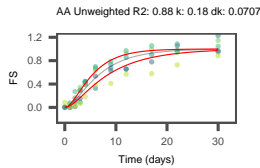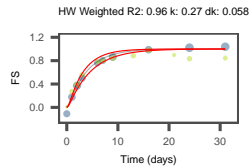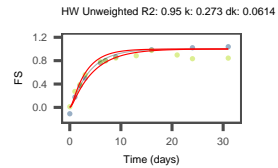

**TPD54**

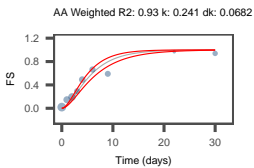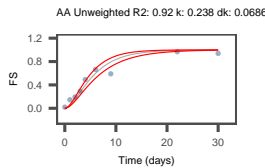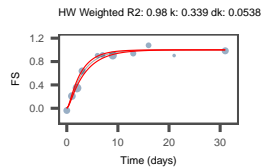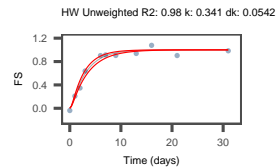

**TPIS**

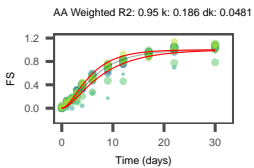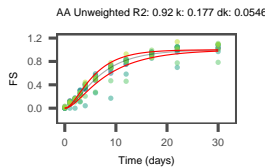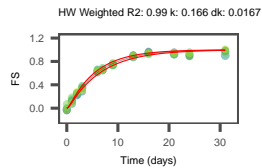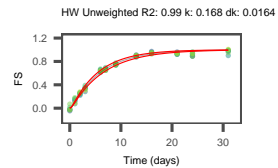

**TPMT**

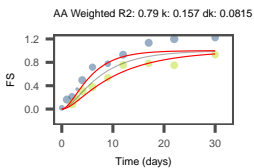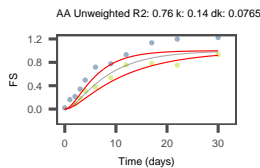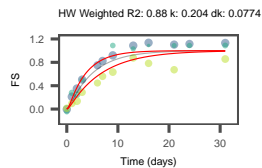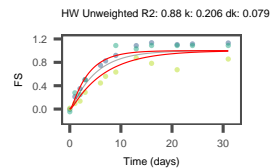

**TRAP1**

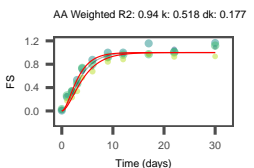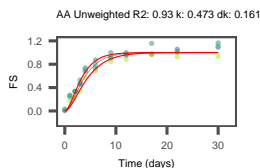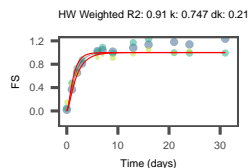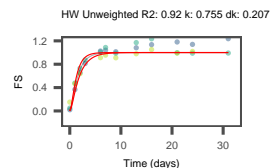

## TRFE

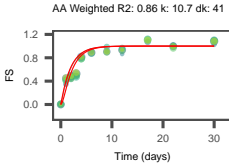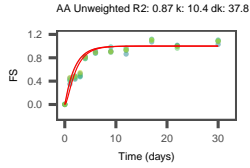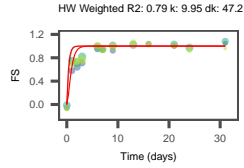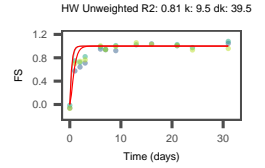

## TTC38

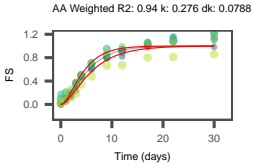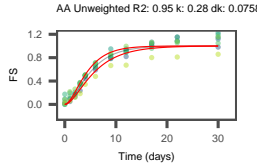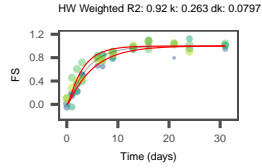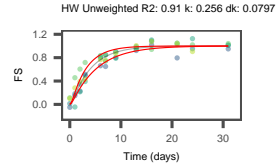

## TTPA

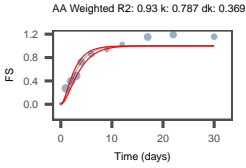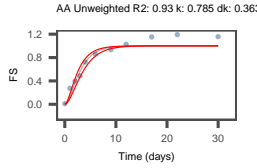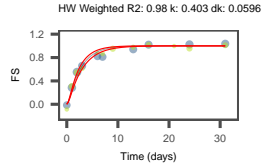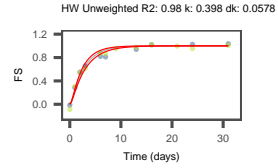

## TXND5

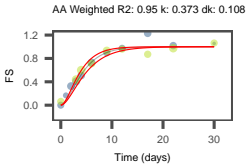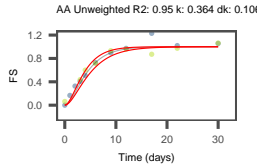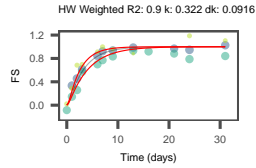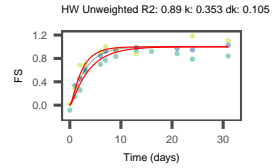

## TXNL1

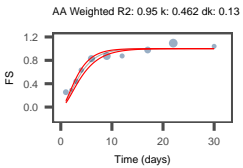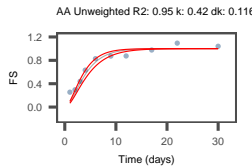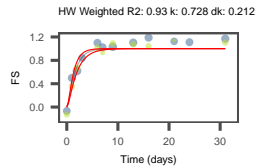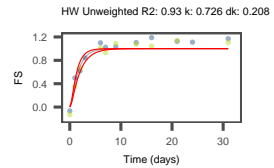

## TXTP

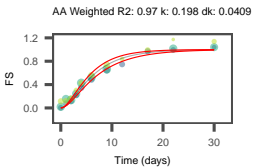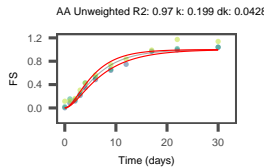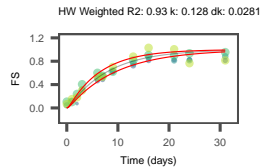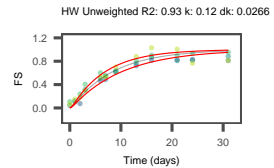

UBA1

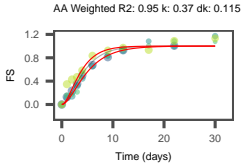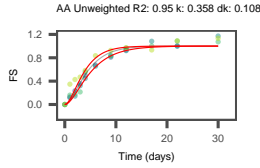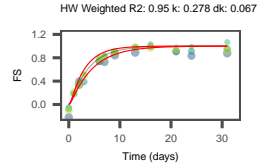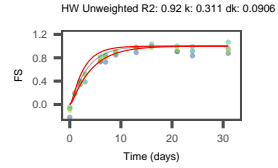

UBE2N

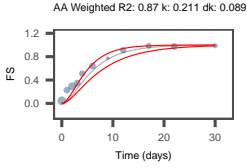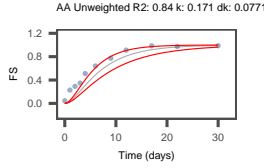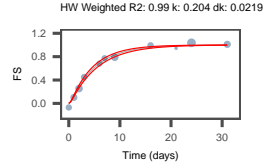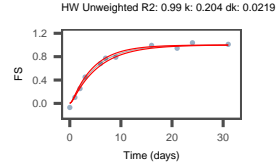

UCR1

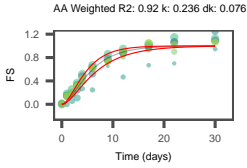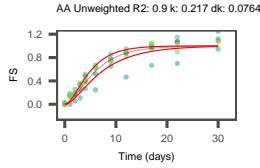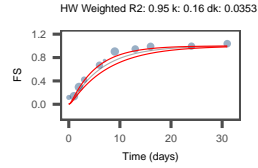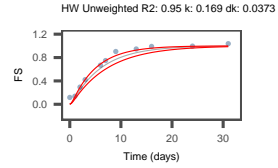

UD11

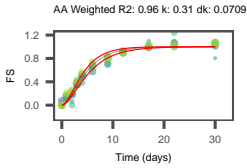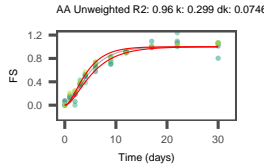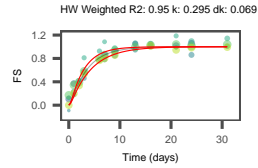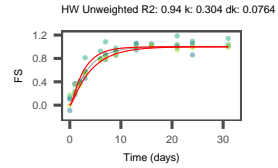

UD16

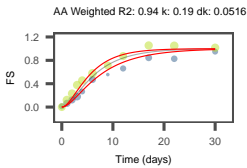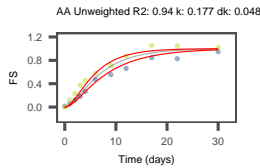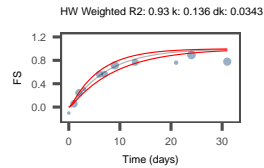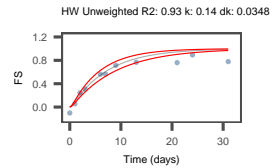

UD2A3

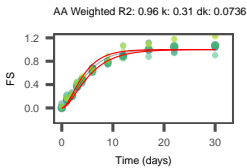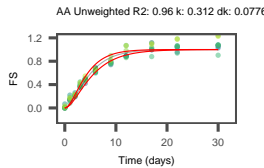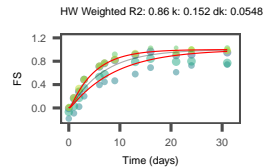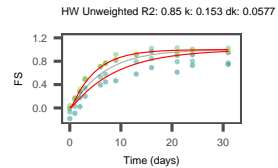

UD3A2

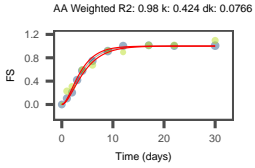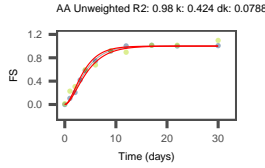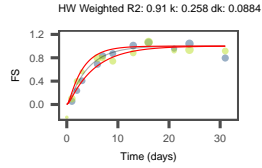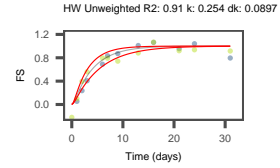

UDB17

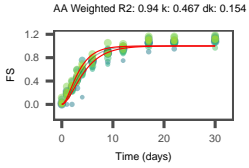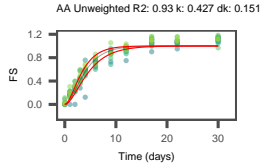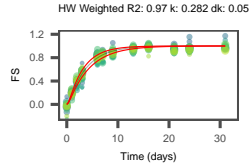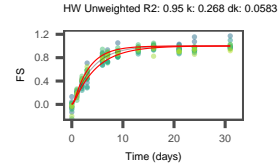

UGDH

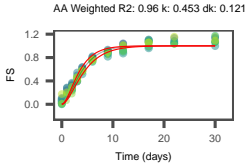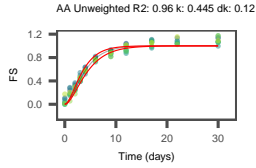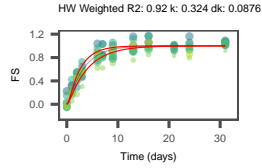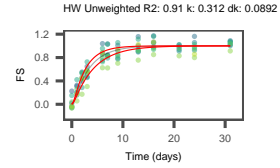

UGPA

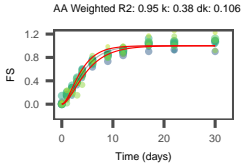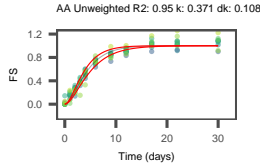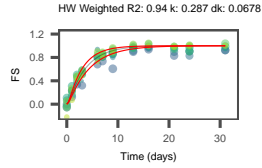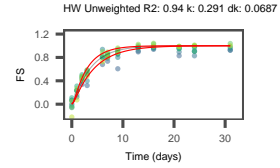

URIC

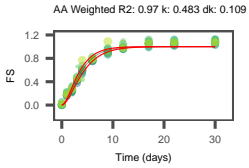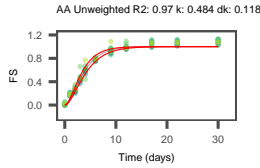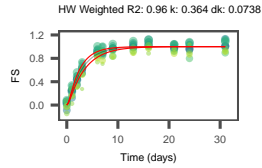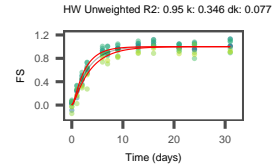

VAPA

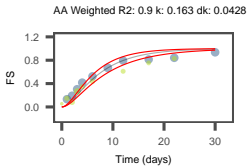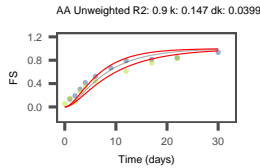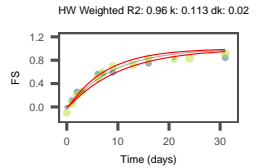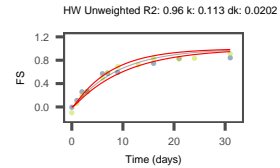



## VDAC1

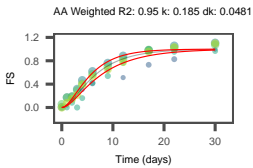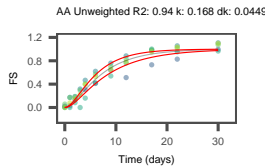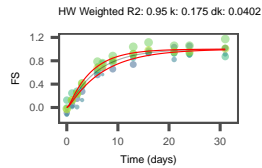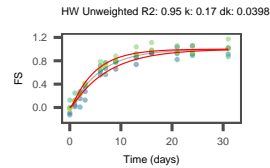

## VDAC2

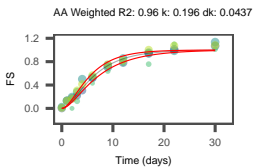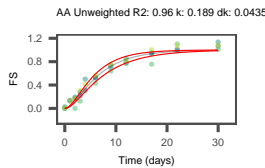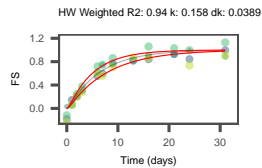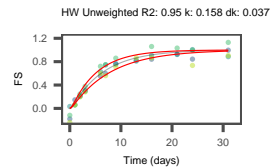

## VDAC3

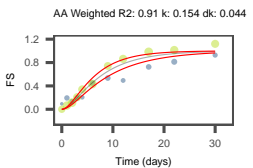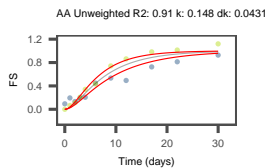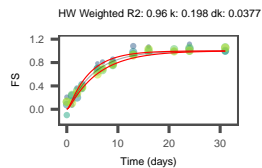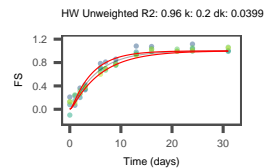

## VIGLN

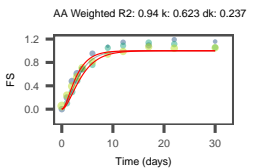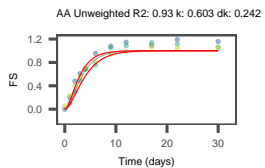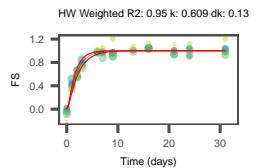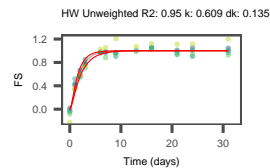

## VINC

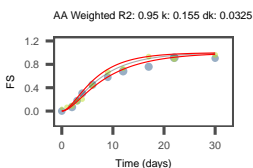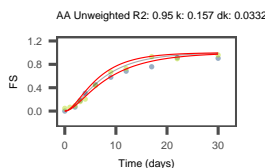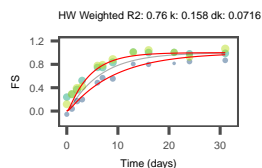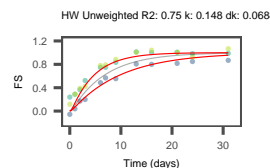

## VPS35

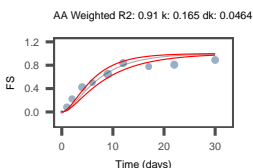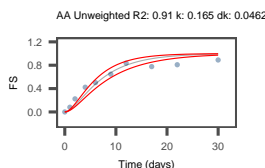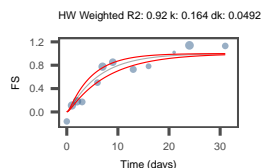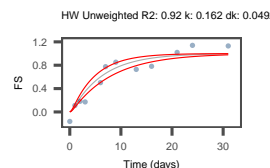

VWA8

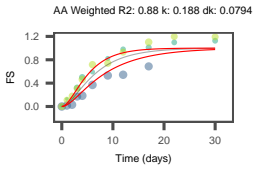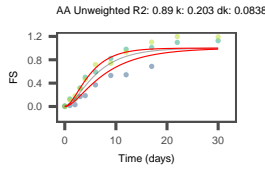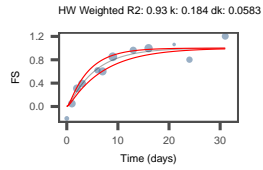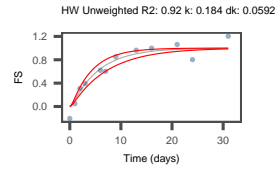

WDR1

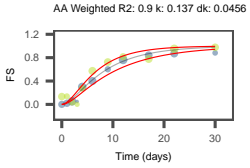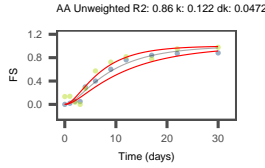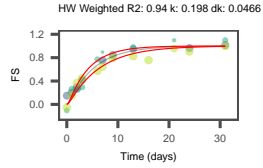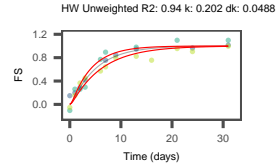

XDH

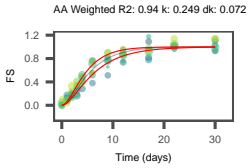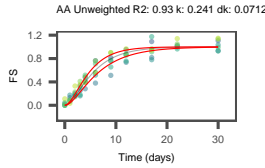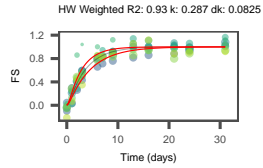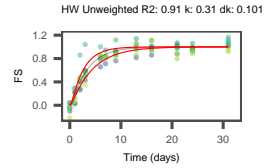

XYLB

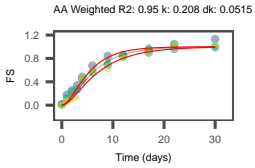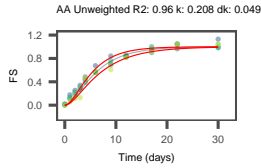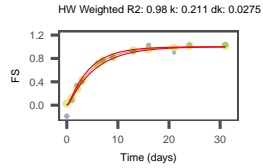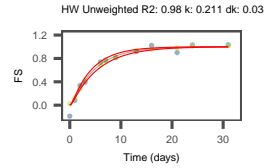

Supplement: mmc9.pdf [file mmc9.pdf]
