# Supplementary material for: Harmonizing Labeling and Analytical Strategies to Obtain Protein Turnover Rates in Intact Adult Animals
Source: PubMed Central journal article supplement (PMC9249856; doi:10.1016/j.mcpro.2022.100252), 2022-05-28

1433E

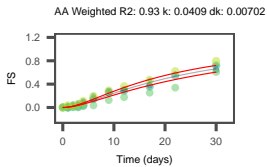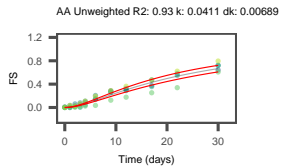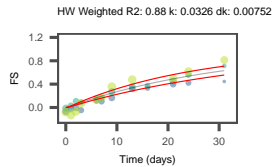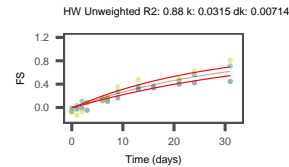

1433G

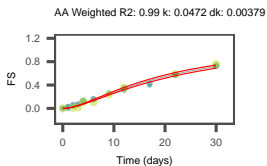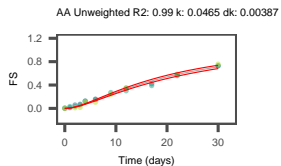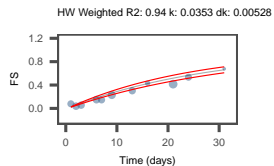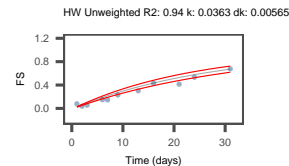

2AAA

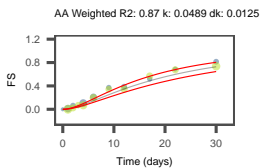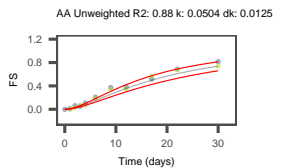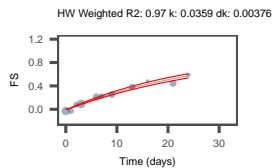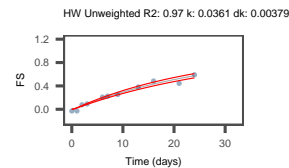

AATM

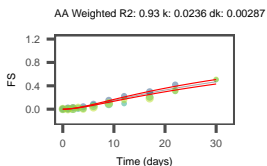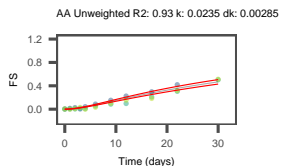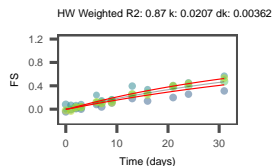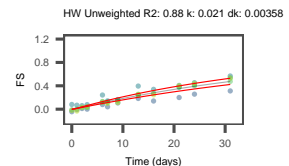

ABEC2

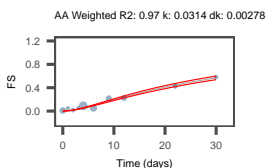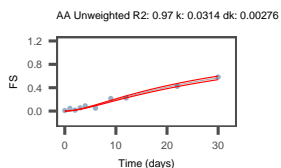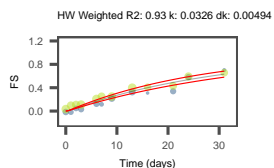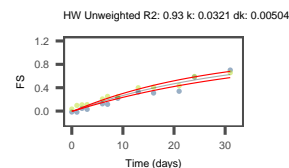

ACADL

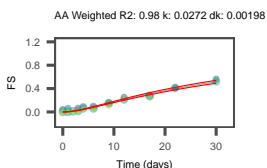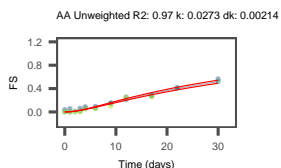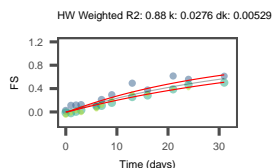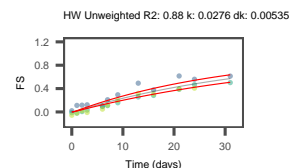

ACADM

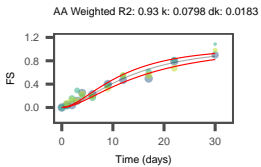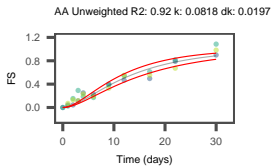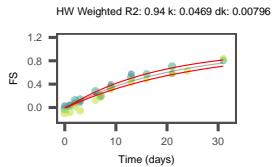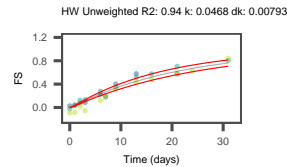

ACADV

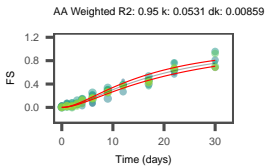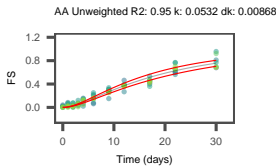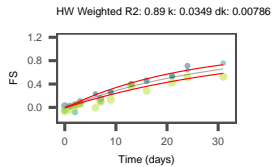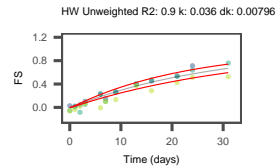

ACBP

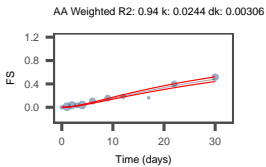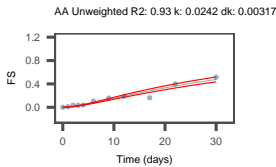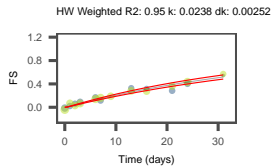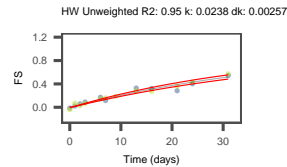

ACO13

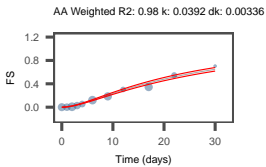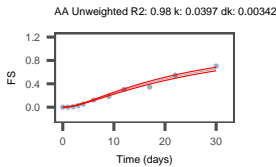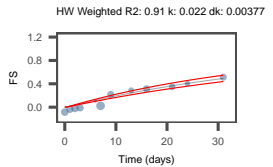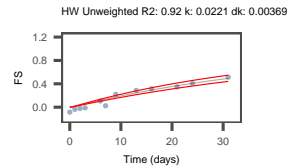

ACON

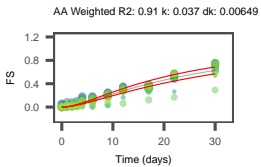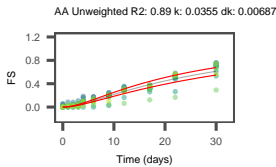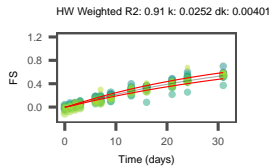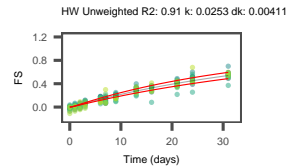

ACSL1

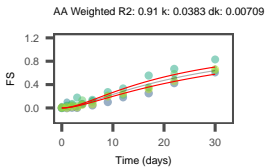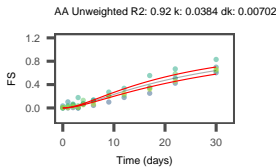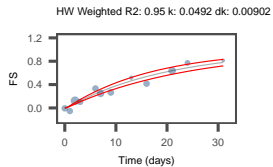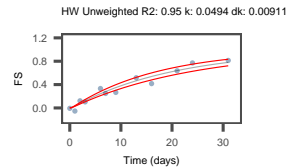

## ACTN2

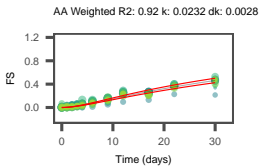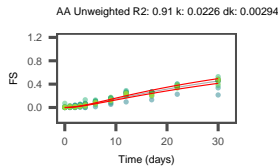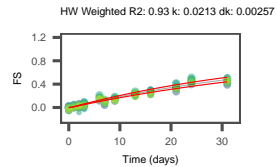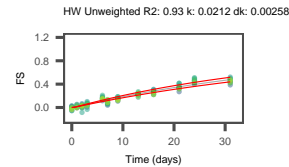

## ACTN3

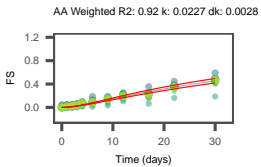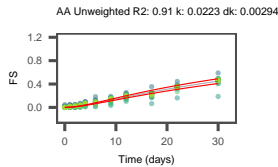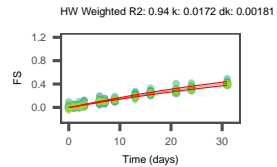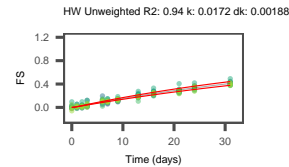

## ADT1

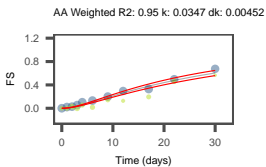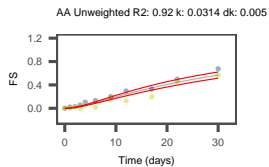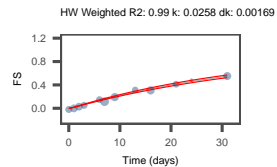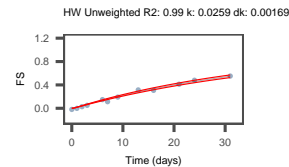

## ALBU

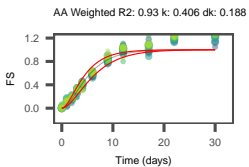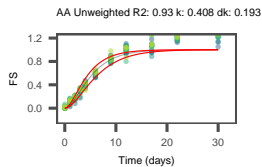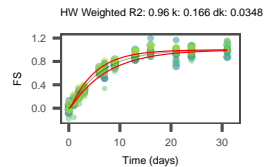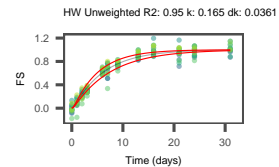

## ALDH2

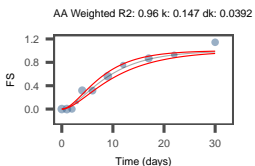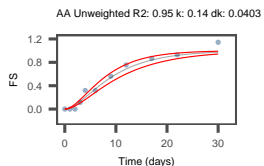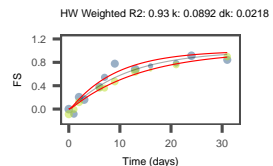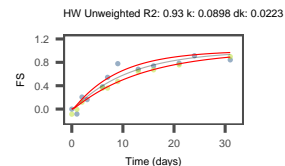

## ALDOA

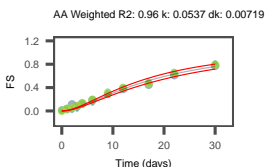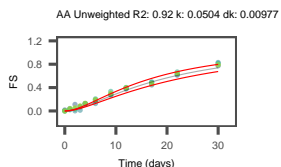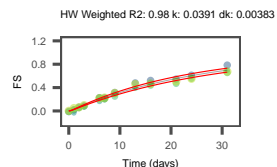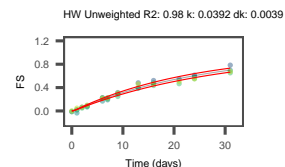

## ALDR

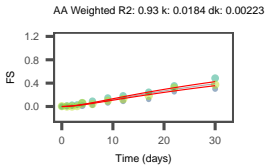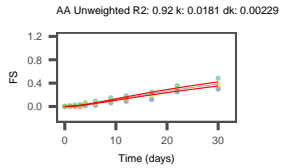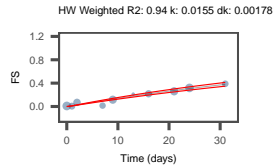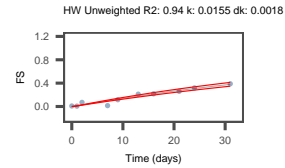

## AMPD1

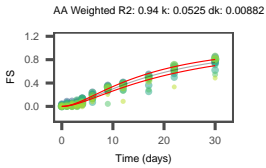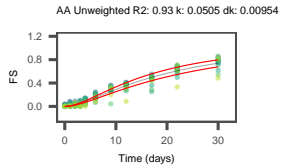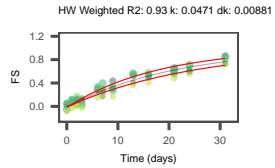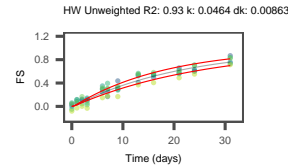

## ANXA6

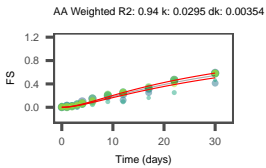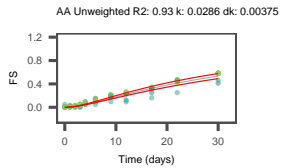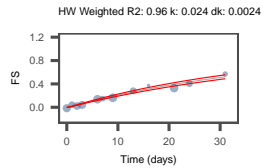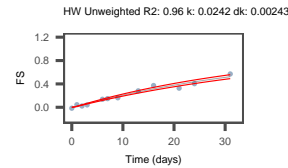

## AT2A1

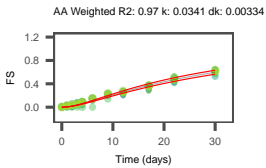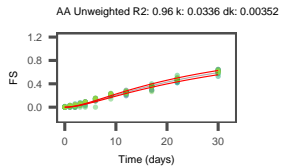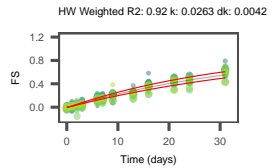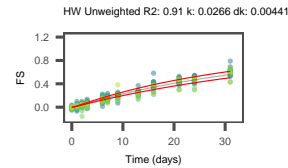

## AT5F1

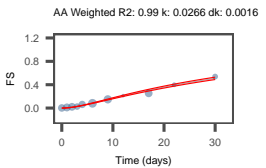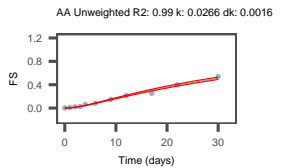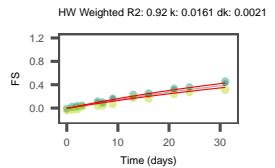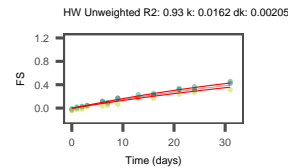

## ATP5H

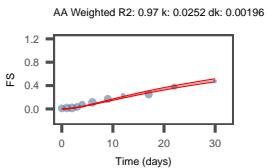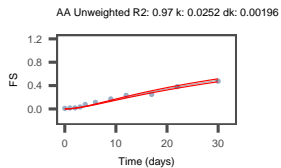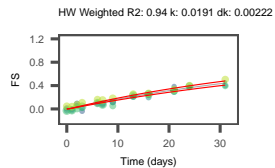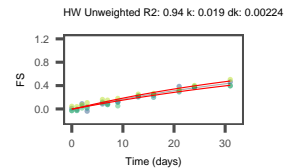

## ATP5J

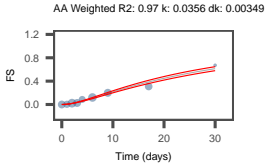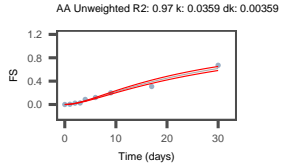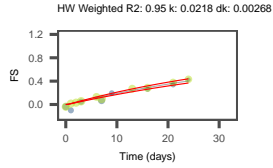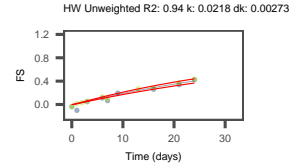

## ATP5L

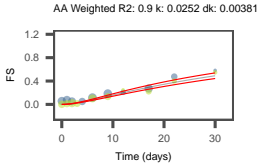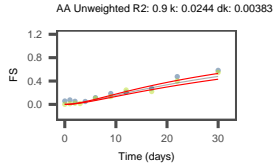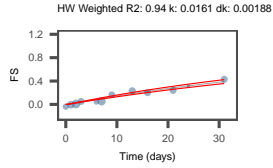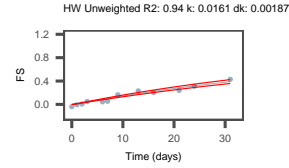

## ATPA

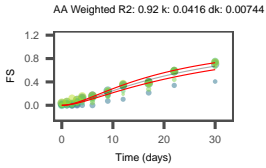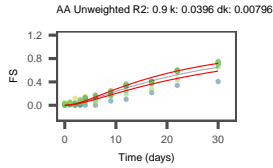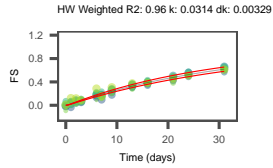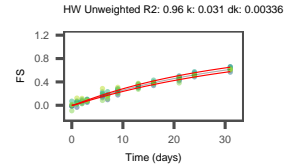

## ATPB

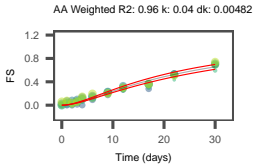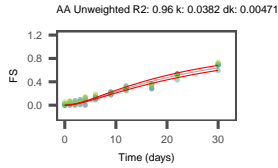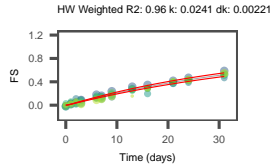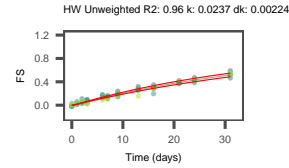

## ATPD

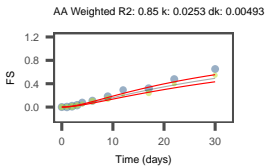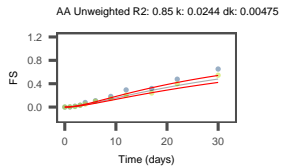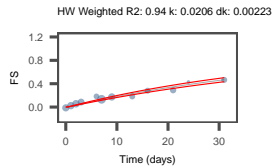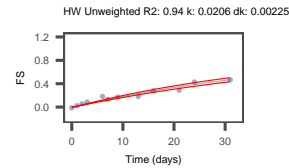

## ATPG

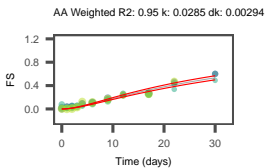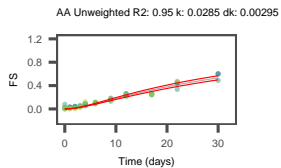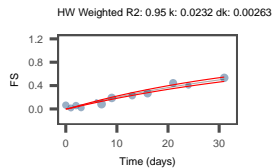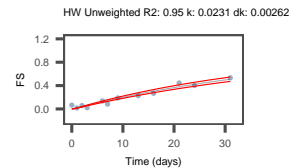

## ATPO

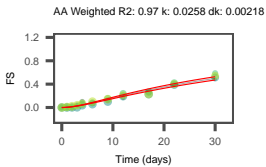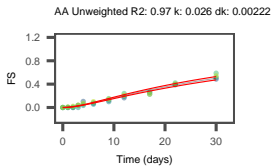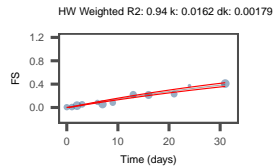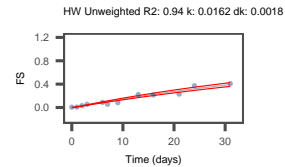

## BIN1

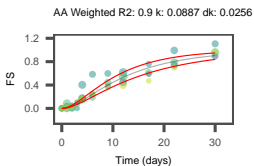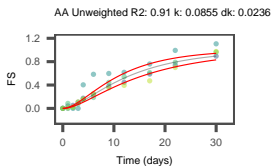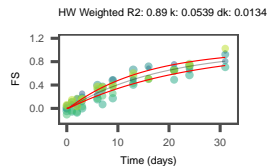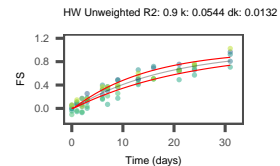

## CAH3

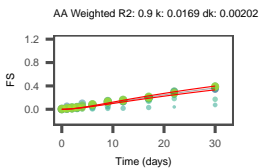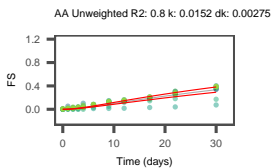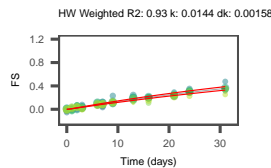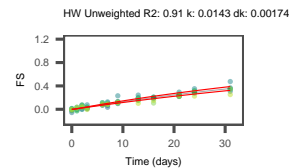

## CH10

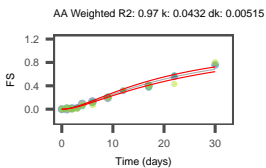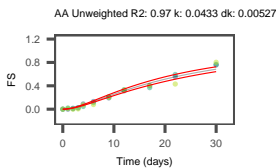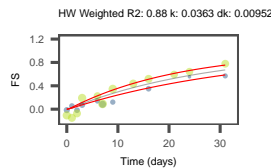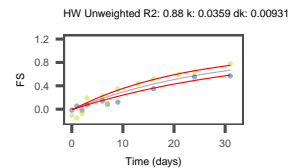

## CH60

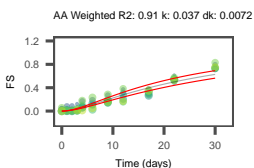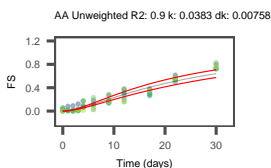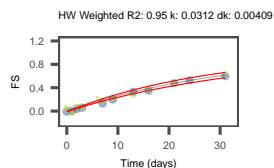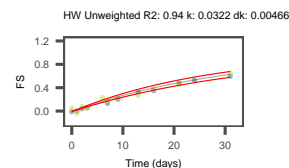

## CISD1

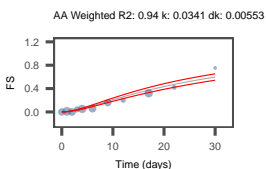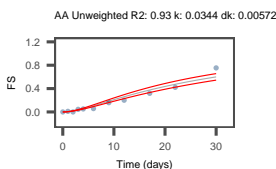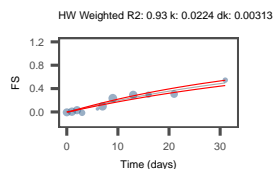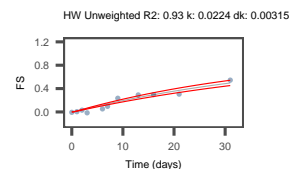

CLH1

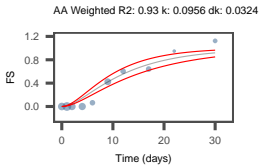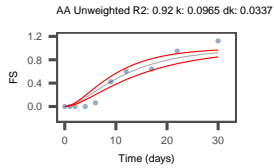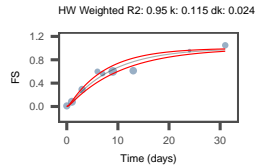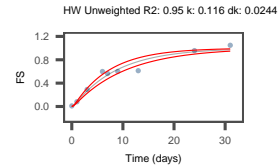

CMC1

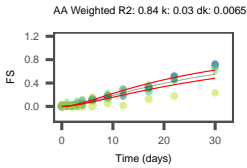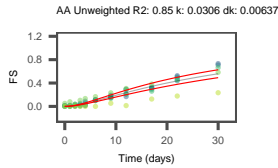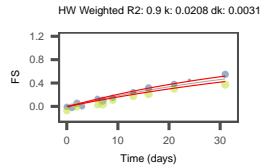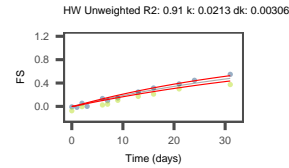

COF2

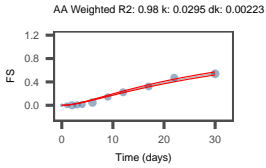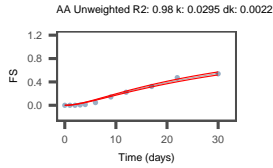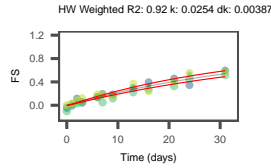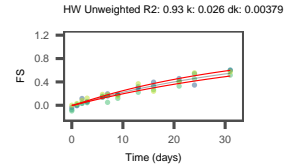

COQ9

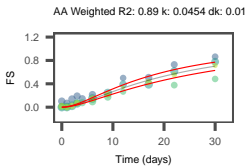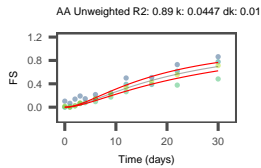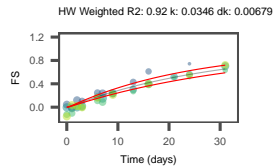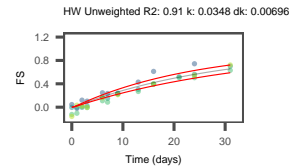

COX41

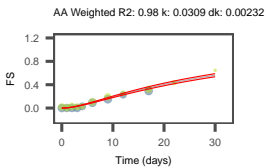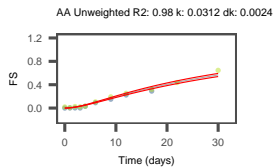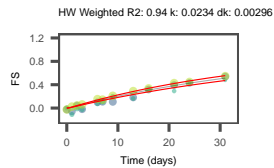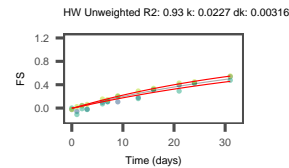

COX5A

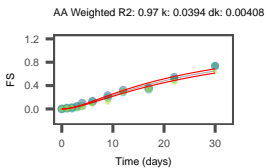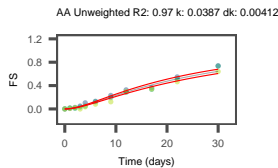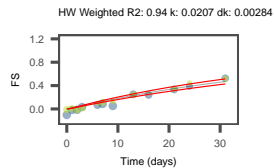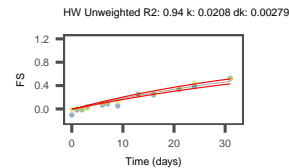

## COX5B

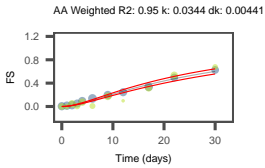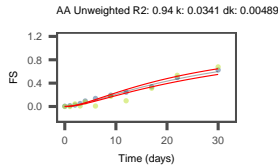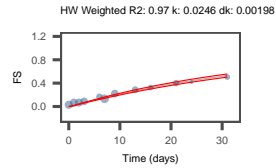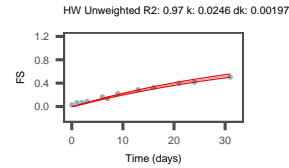

## COX6C

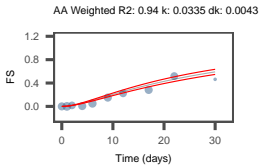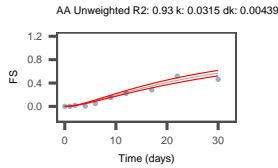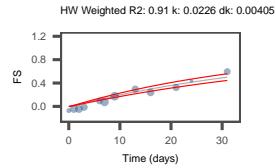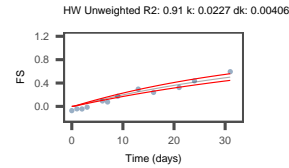

## CPT1B

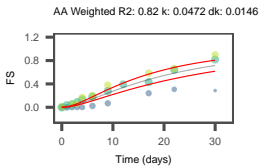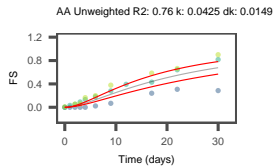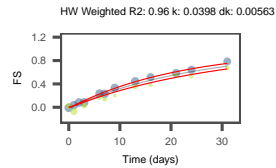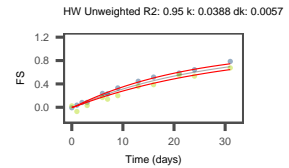

## CRYAB

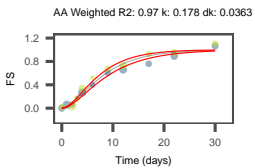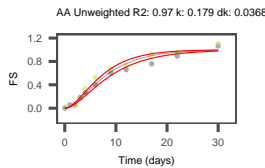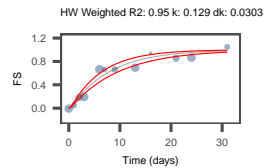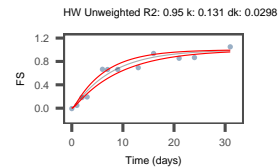

## CYC

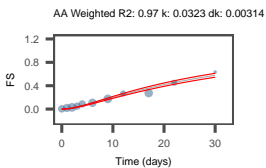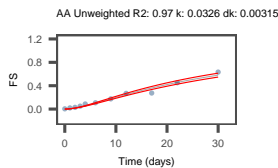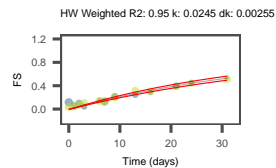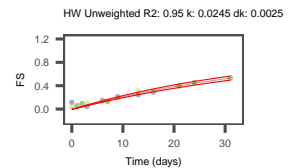

## DESM

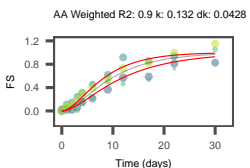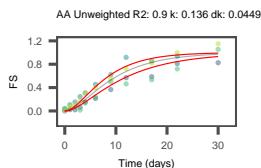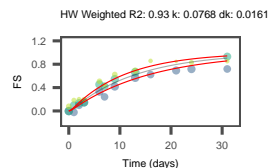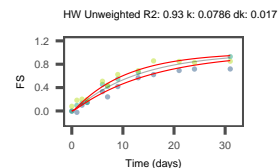



DLDH

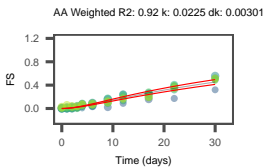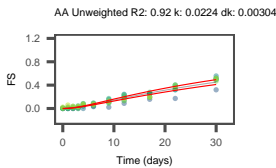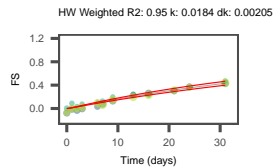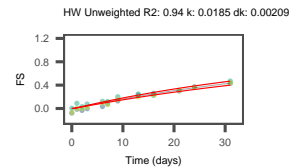

ECHA

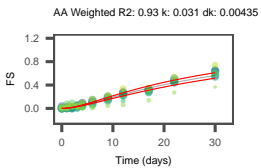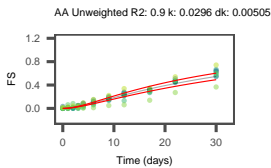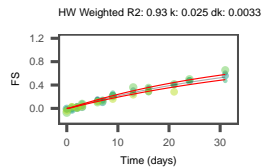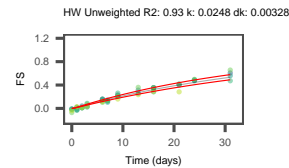

ECHB

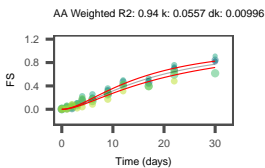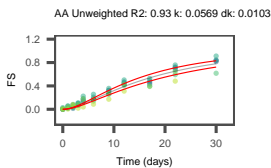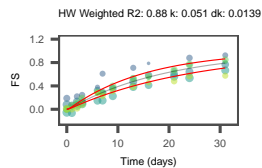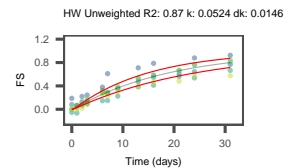

ECH1

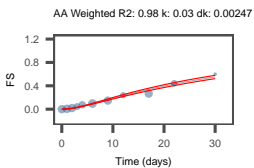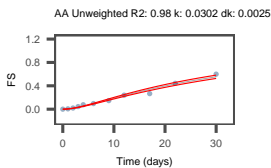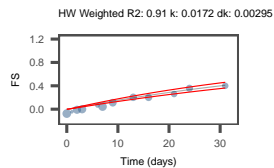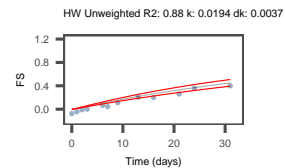

EF1A2

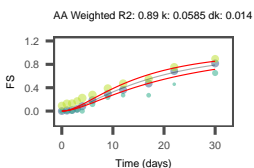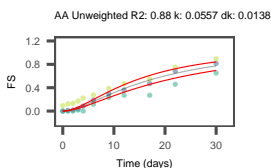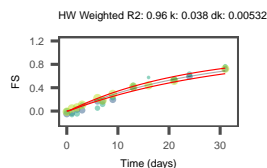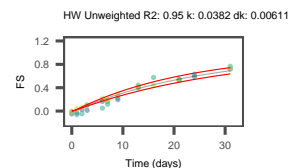

EF2

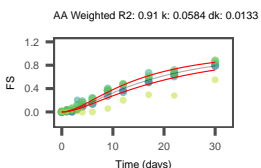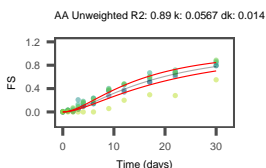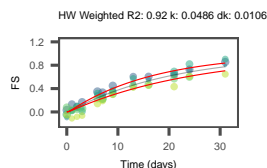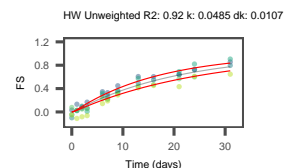

## EFTU

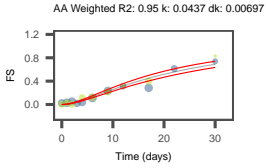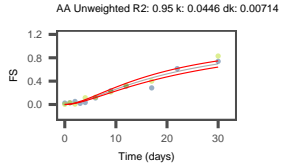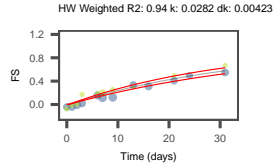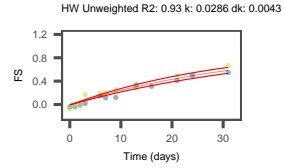

## ENOB

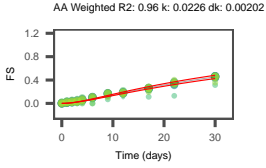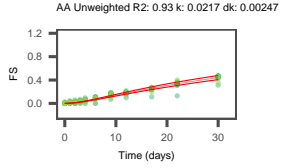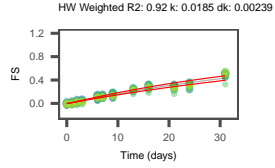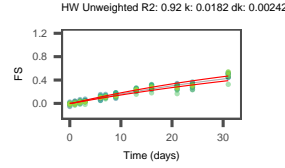

## ETFA

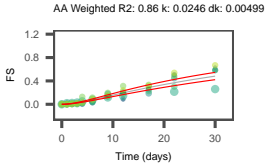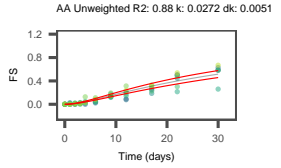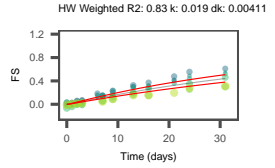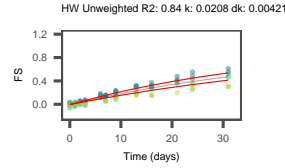

## ETFD

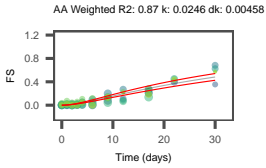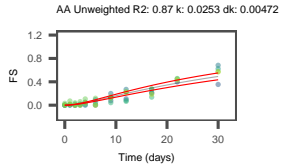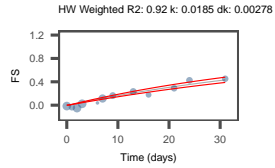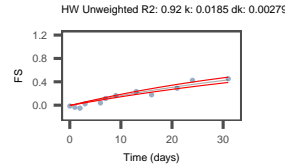

## FABP4

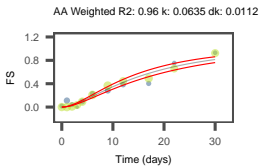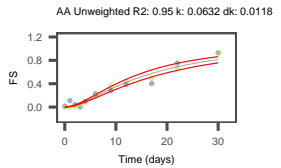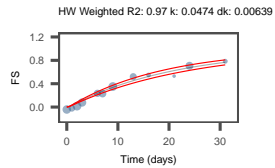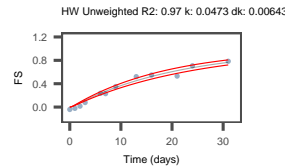

## FHL1

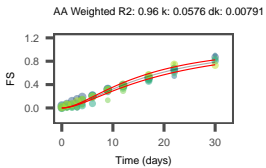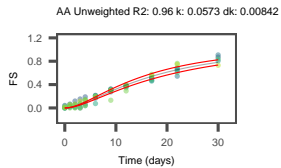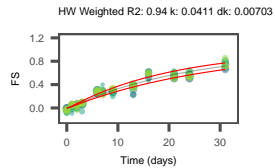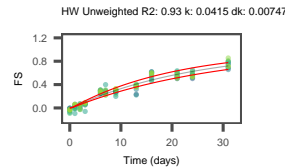

## FHL3

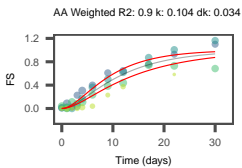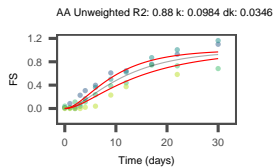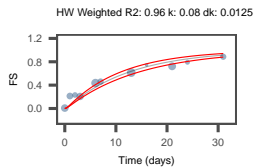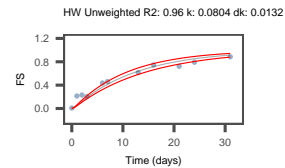

## FKBP3

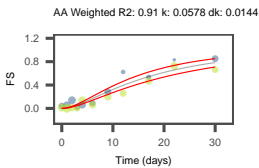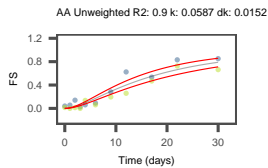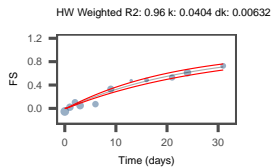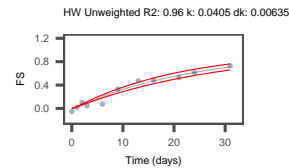

## FLNC

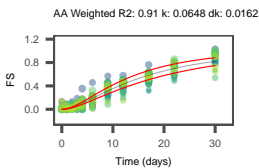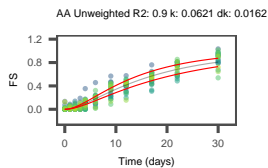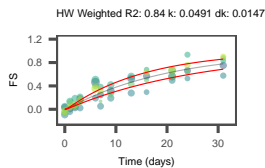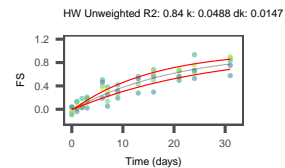

## FUMH

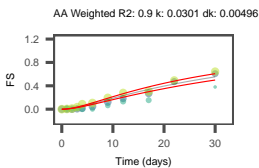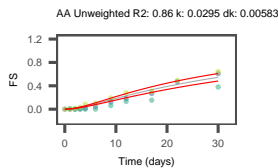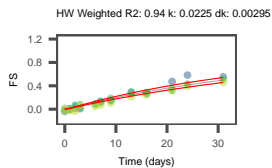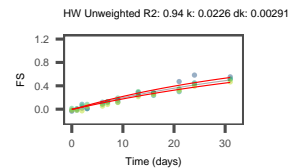

## G3P

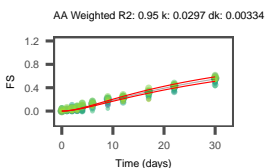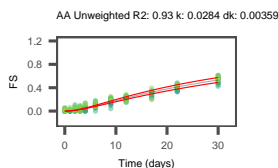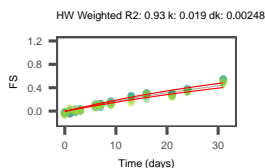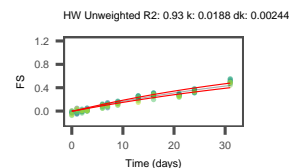

## G6PI

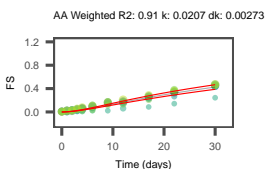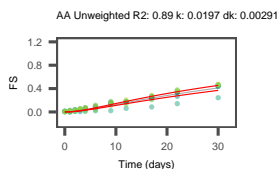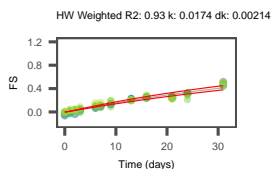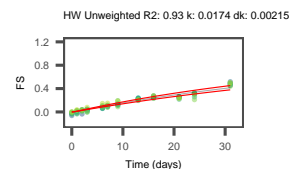

## GAL3A

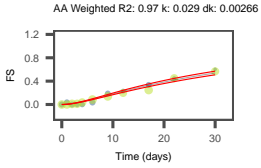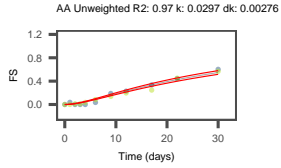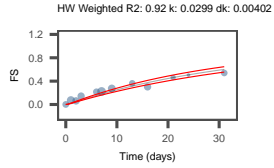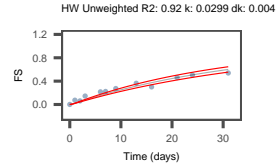

## GLYG

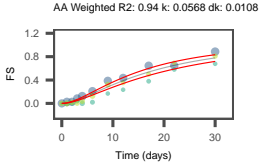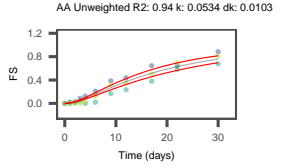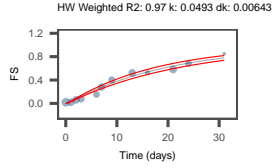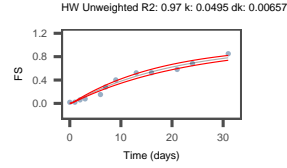

## GPDA

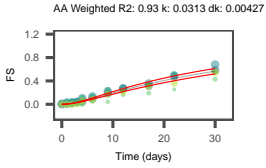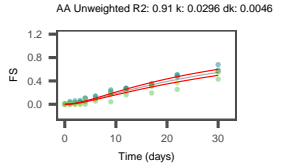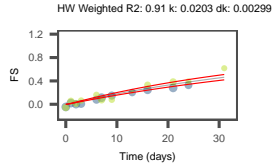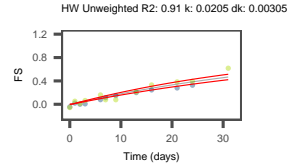

## GPDM

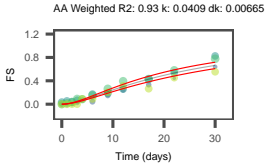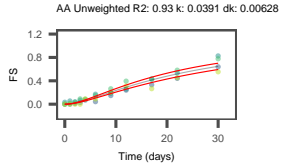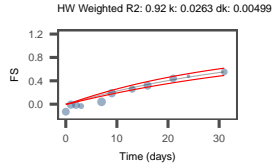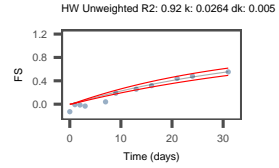

## GRP75

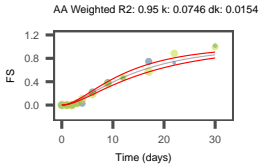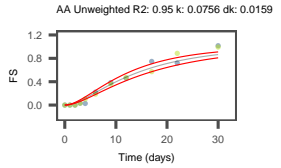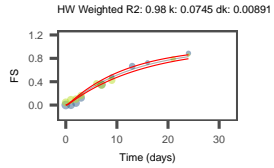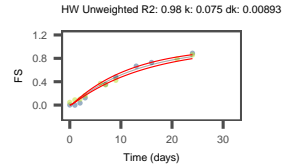

## GSTM1

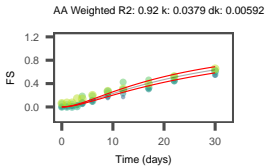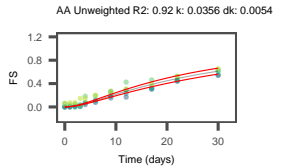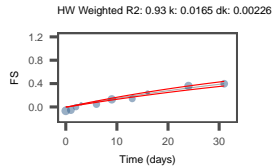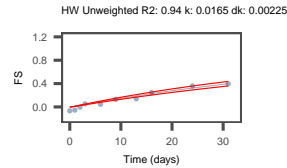

## GYS1

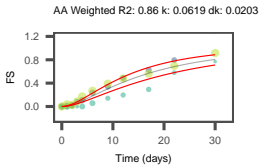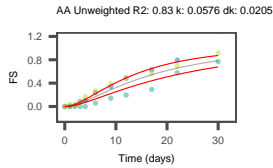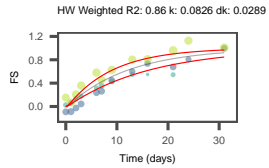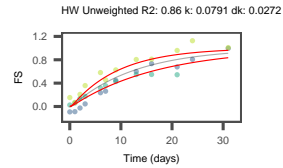

## HBA

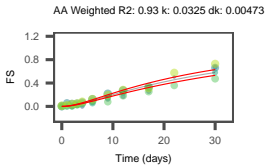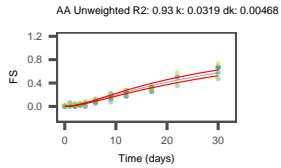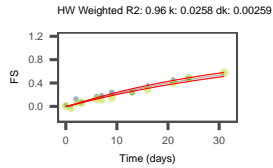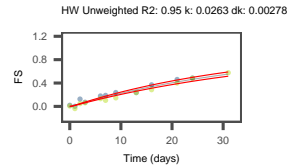

## HBB1

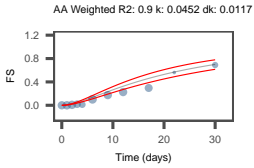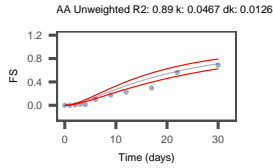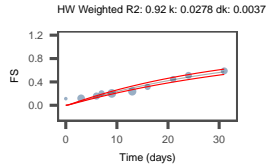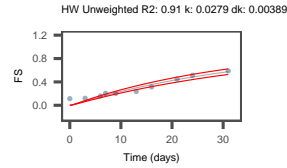

## HCDH

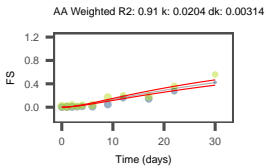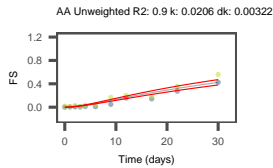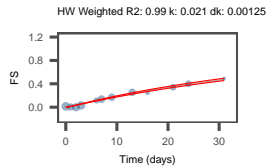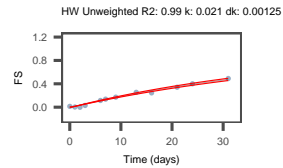

## HINT1

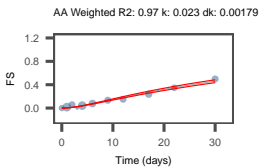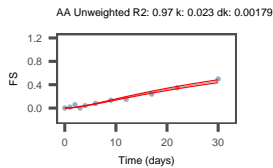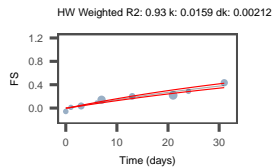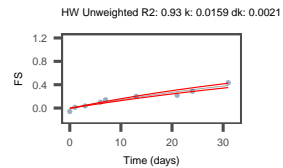

## HS90B

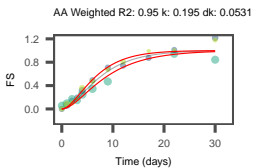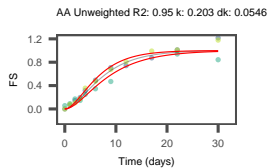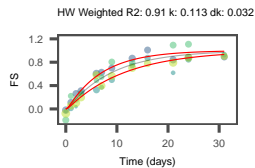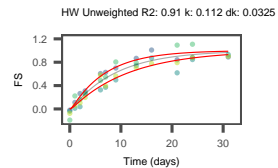

## HSP7C

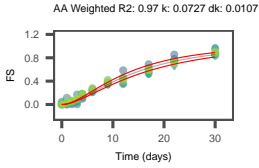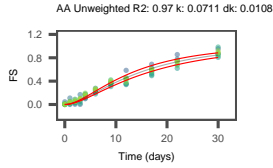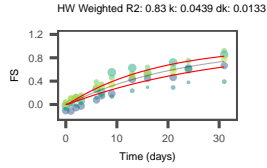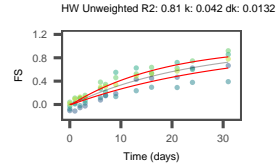

## HSPB6

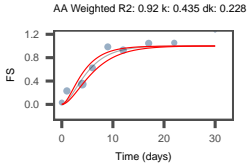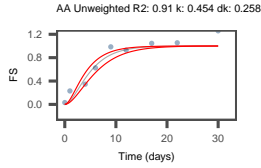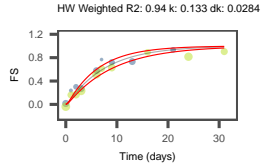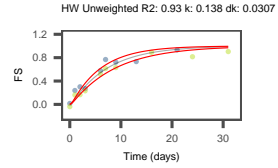

## HXK2

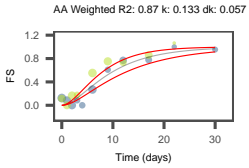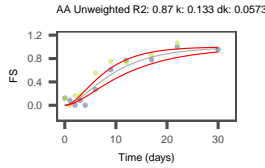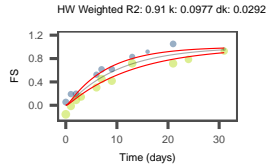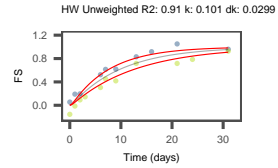

## IDH3A

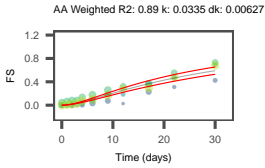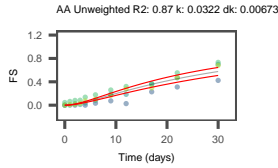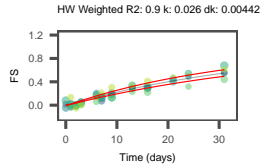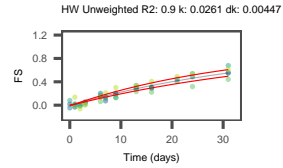

## IDHG1

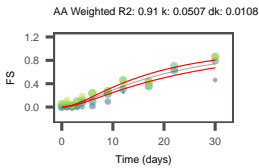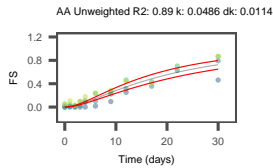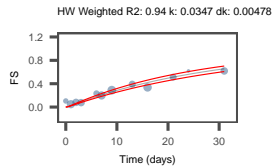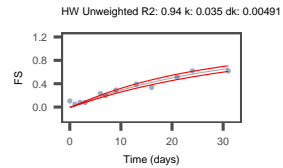

## IDHP

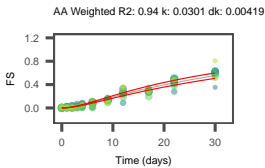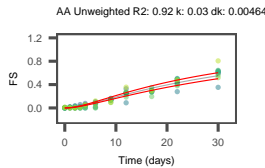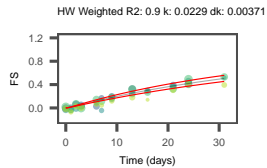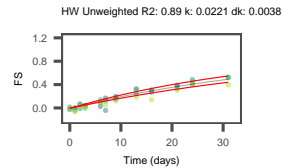

KAD1

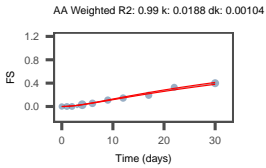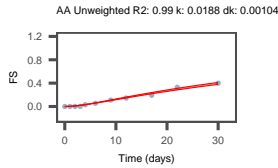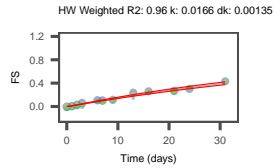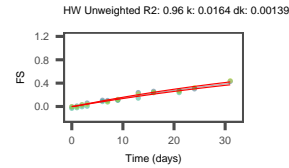

KCRM

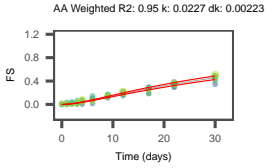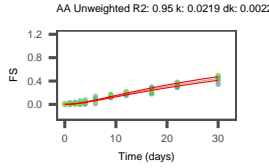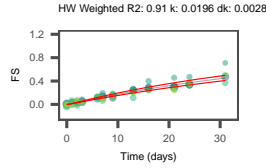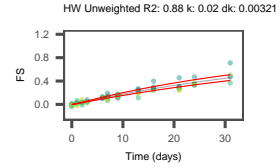

KCRS

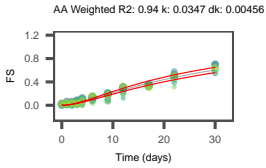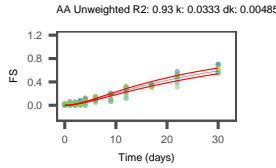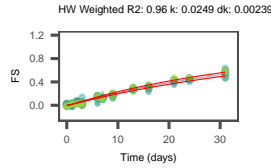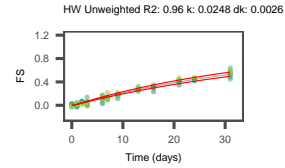

KLH41

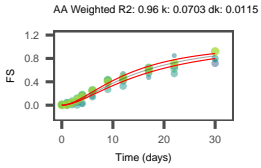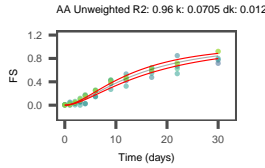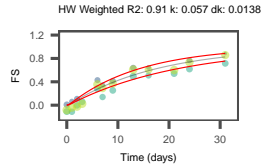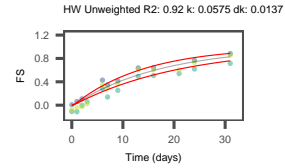

KPB1

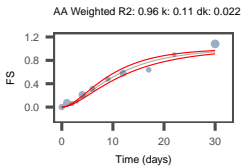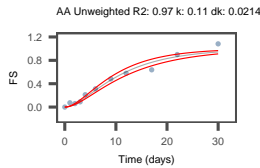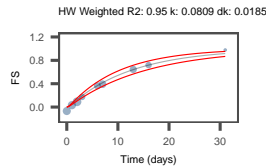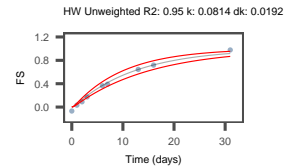

KPBB

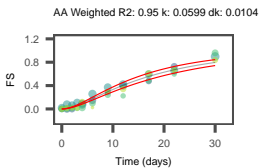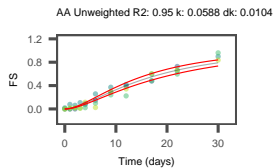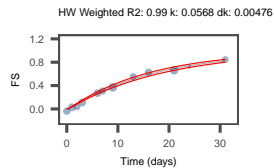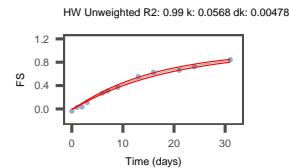

KPYM

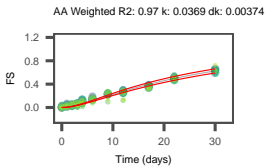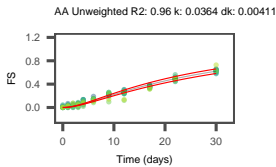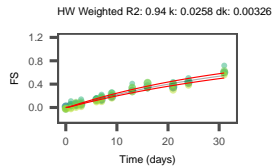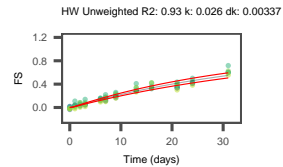

LDB3

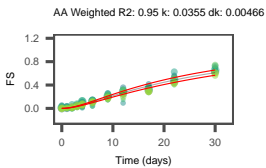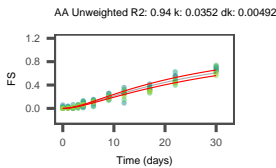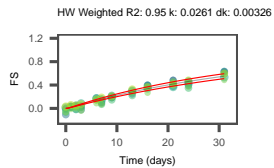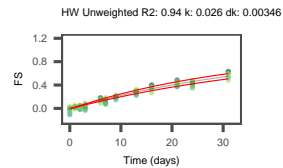

LDHA

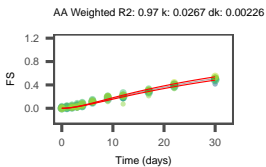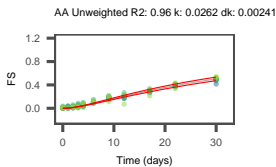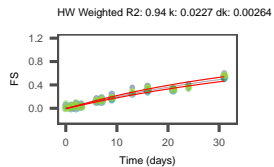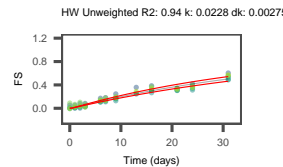

LDHB

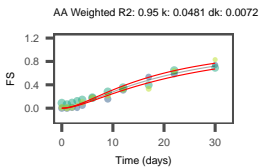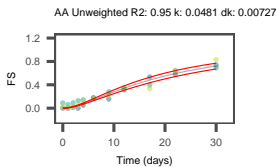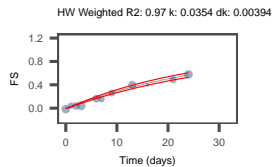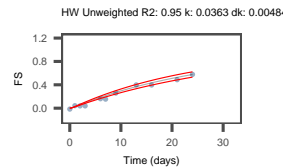

LEG1

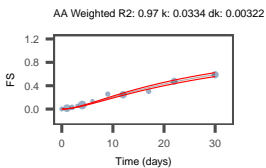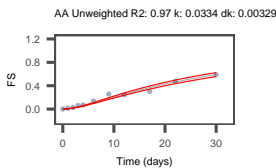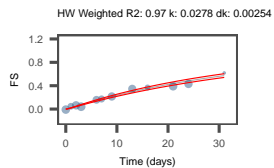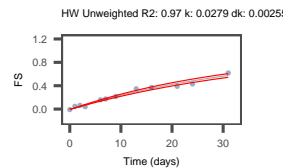

LGUL

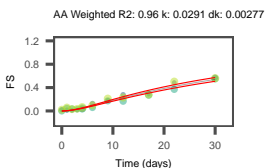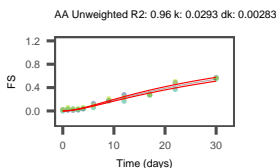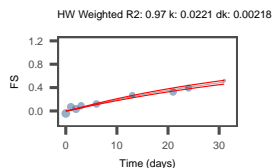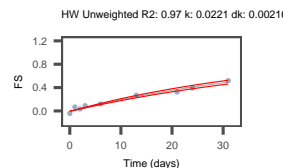



## M2OM

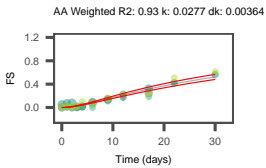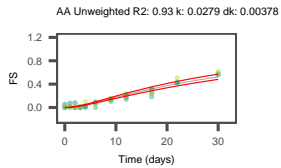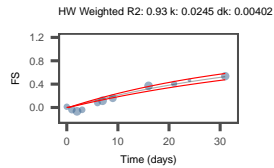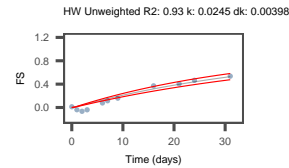

## MDHC

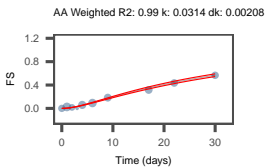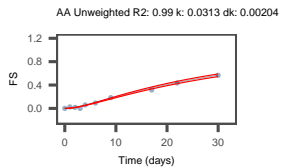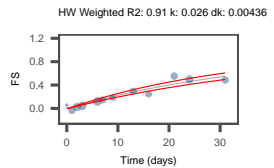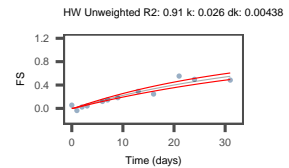

## MDHM

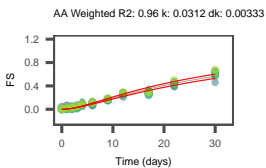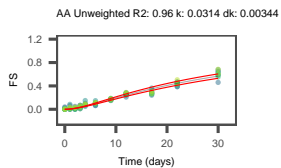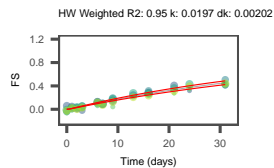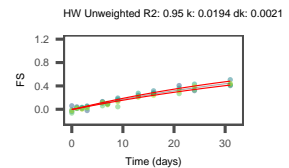

## MIF

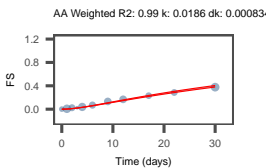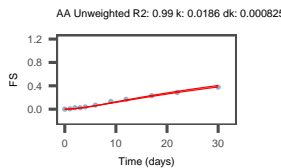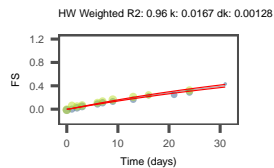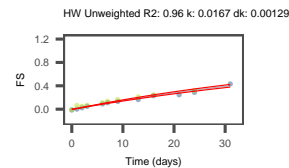

## MLRS

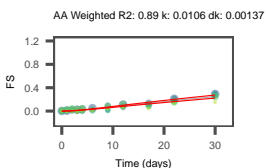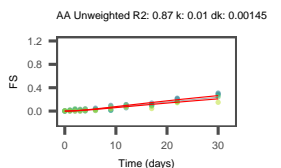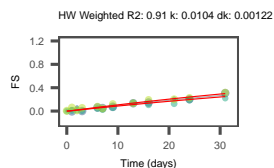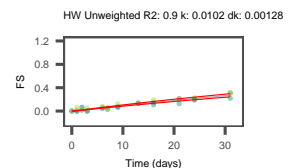

## MMSA

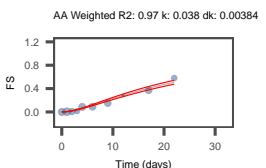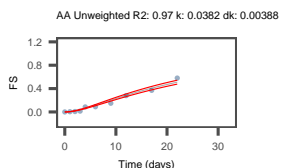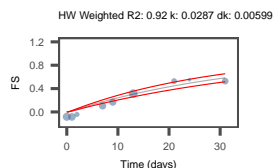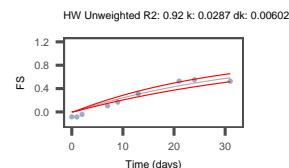

## MPC2

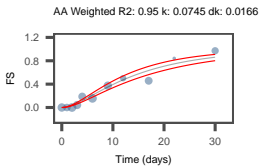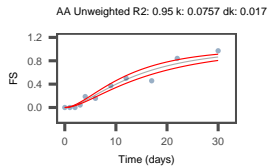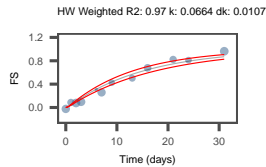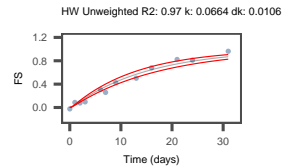

## MPCP

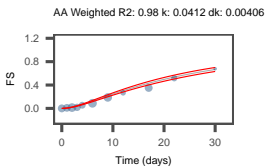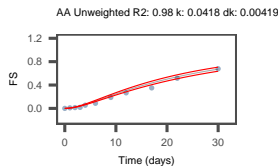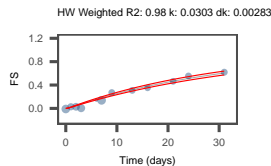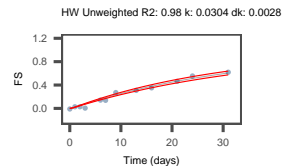

## MYG

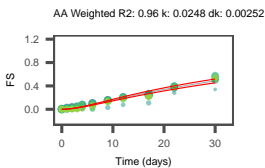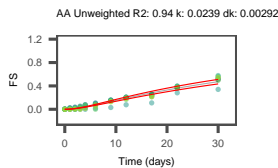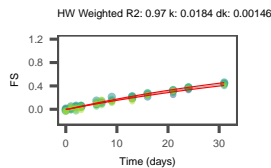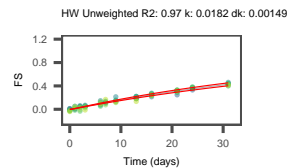

## MYH1

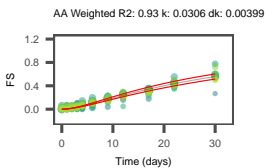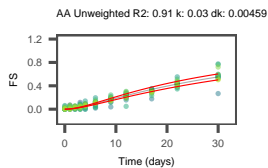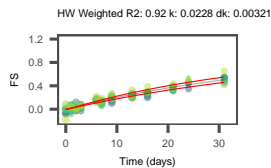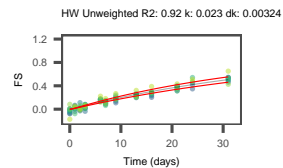

## MYH4

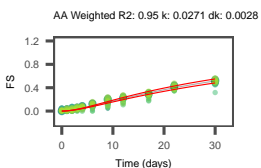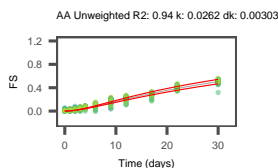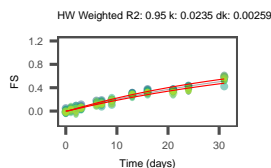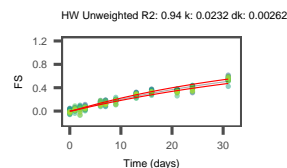

## MYH7

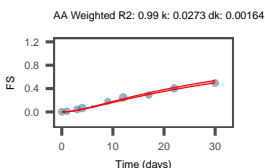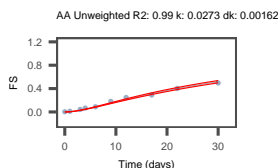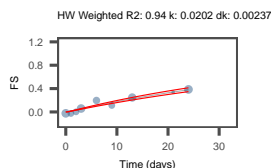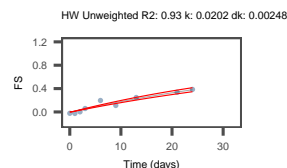

## MYH8

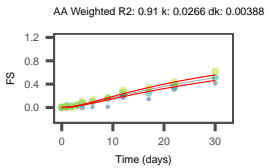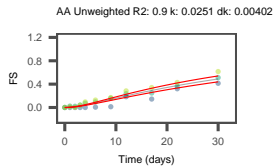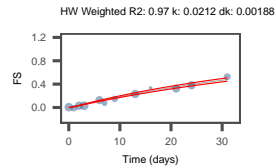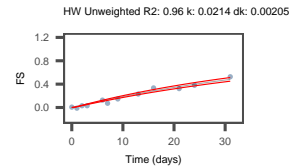

## MYL1

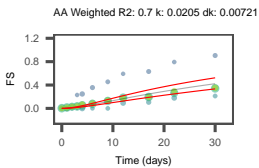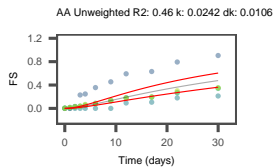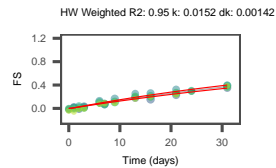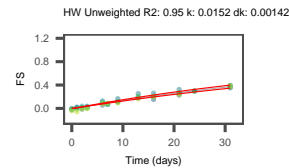

## MYOM1

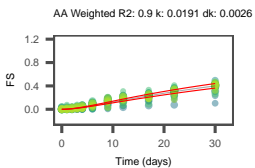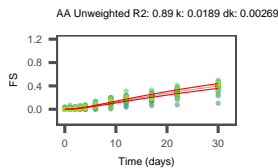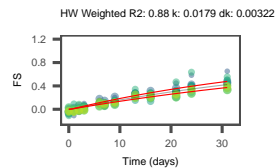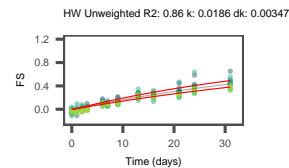

## MYOT1

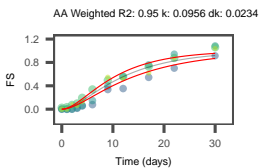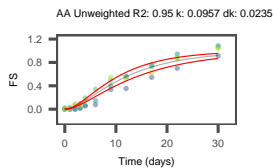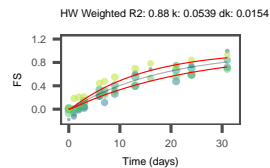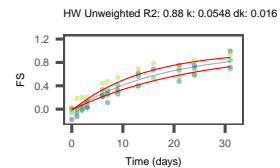

## MYOZ1

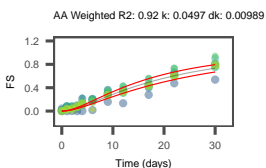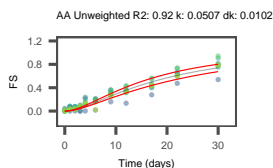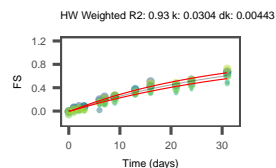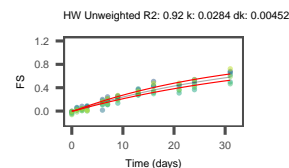

## MYPC2

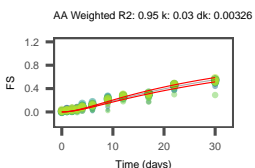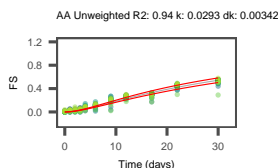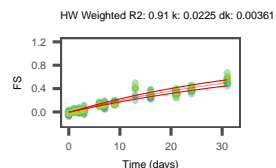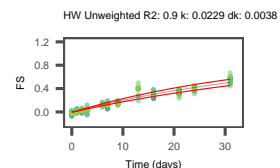

## NACAM

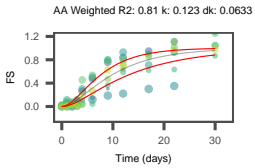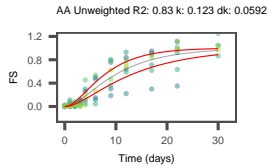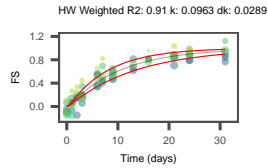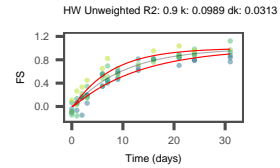

## NDKB

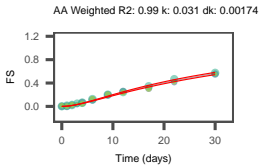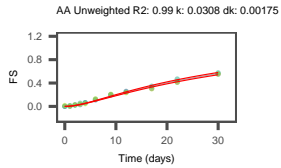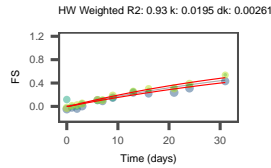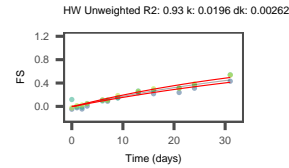

## NDRG2

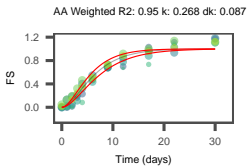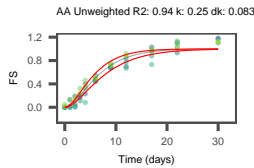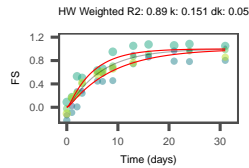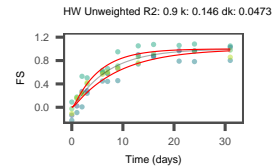

## NDUA7

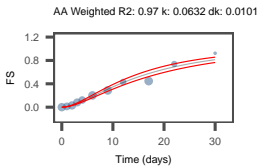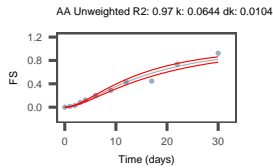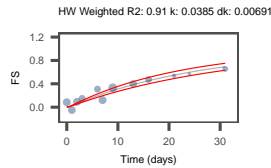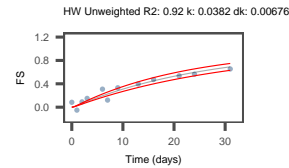

## NDUA9

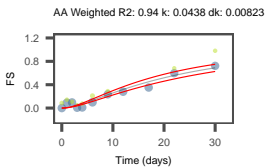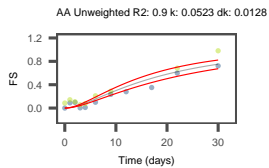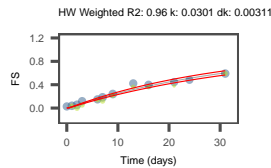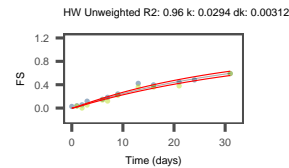

## NDUAA

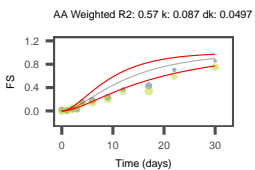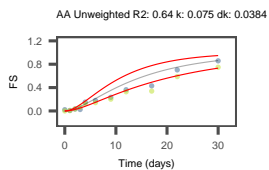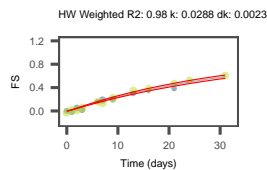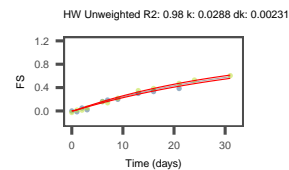

## NDUAD

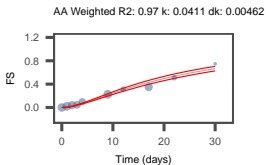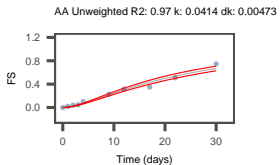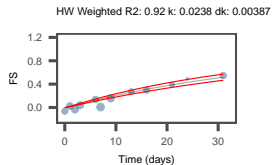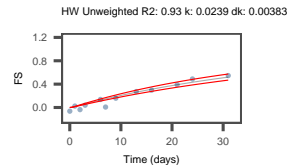

## NDUB9

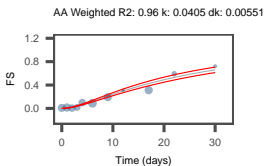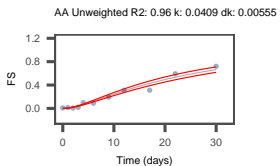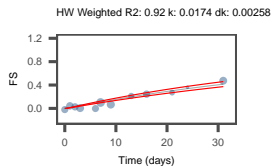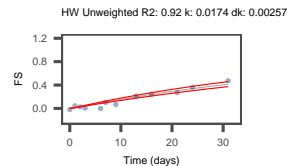

## NDUBA

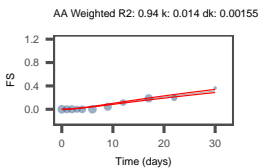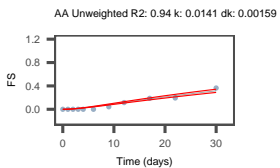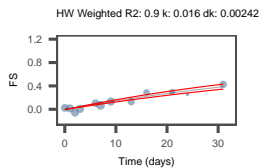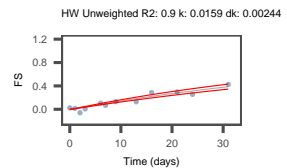

## NDUS1

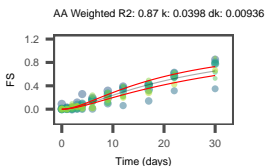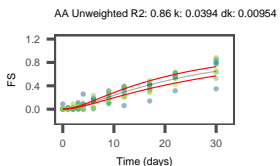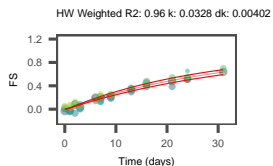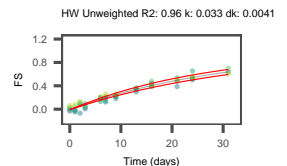

## NDUS2

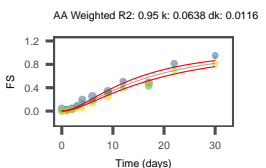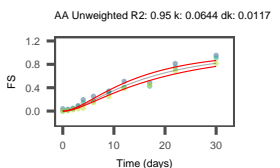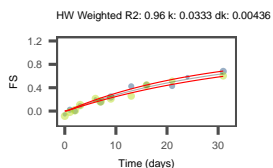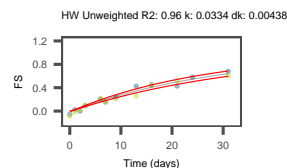

## NDUS3

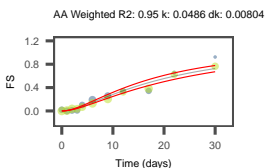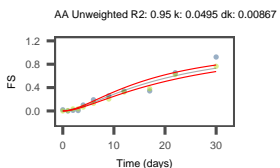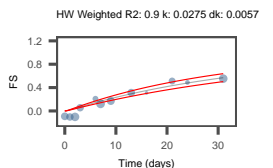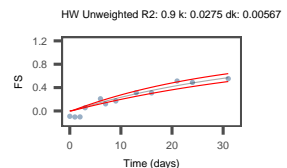

## NDUS4

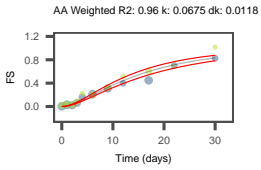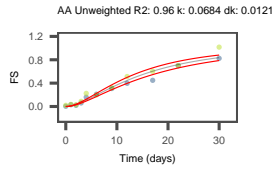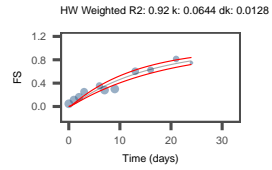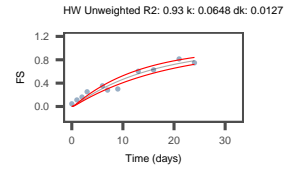

## NDUS8

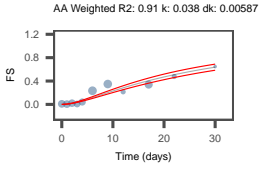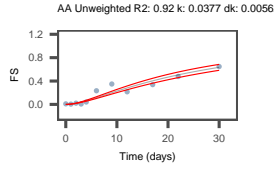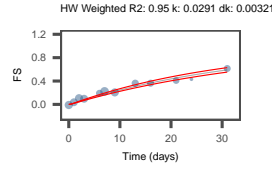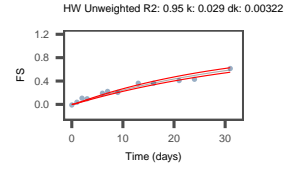

## NDUV1

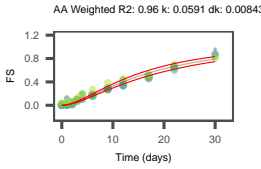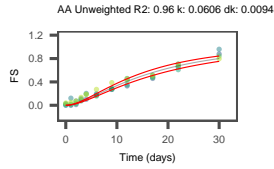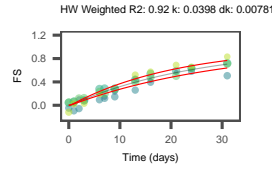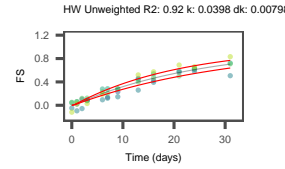

## NNTM

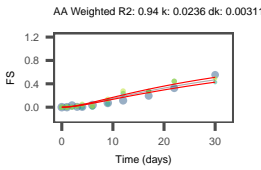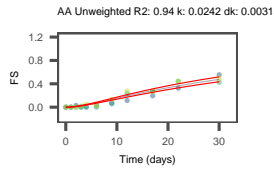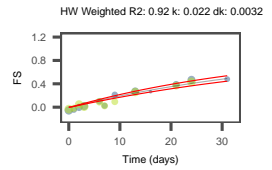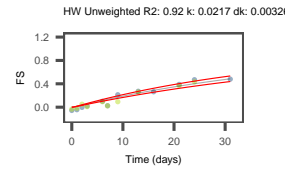

## OBSCN

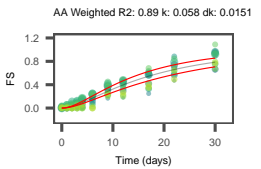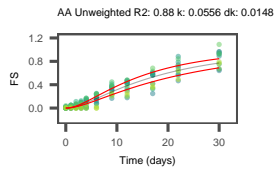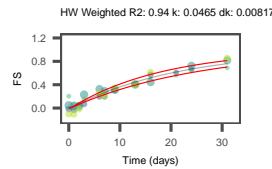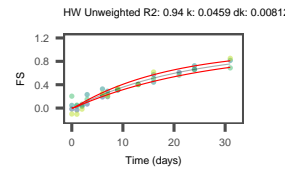

## ODO1

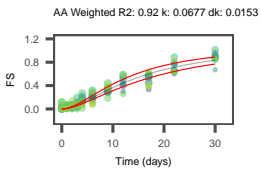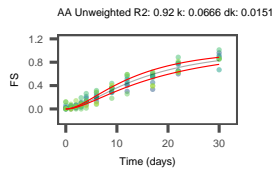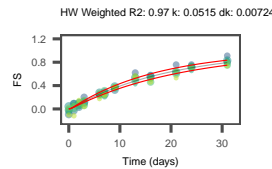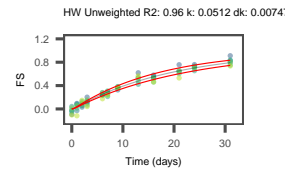

## ODP2

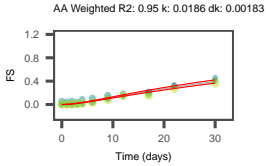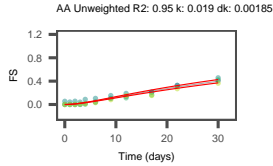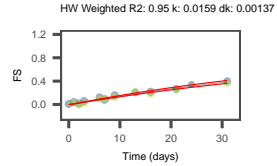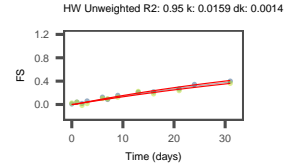

## ODPB

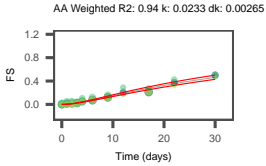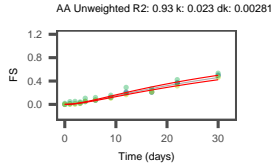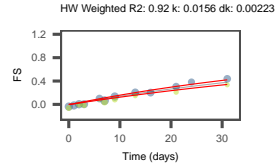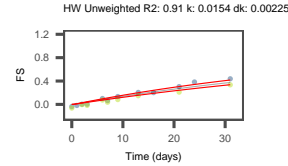

## PADI2

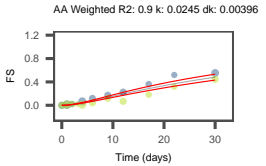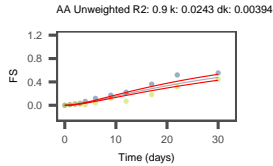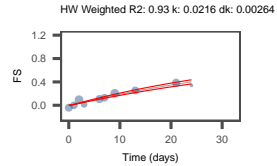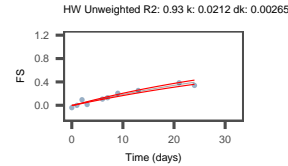

## PARK7

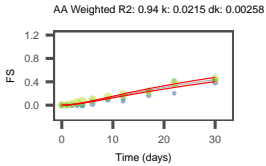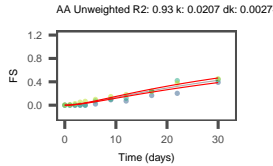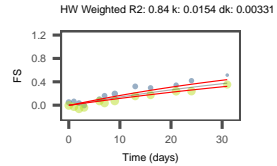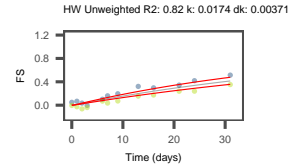

## PDLI5

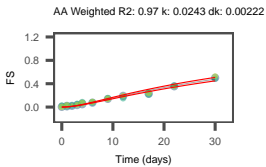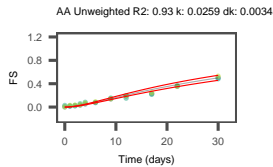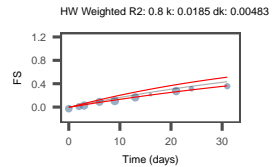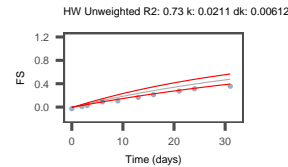

## PFKAM

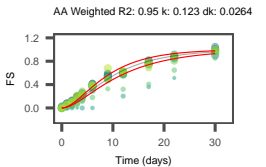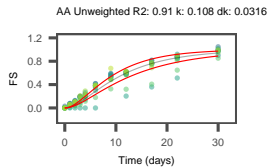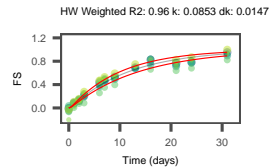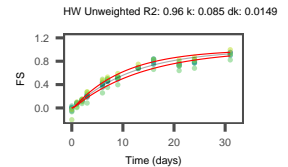

## PGAM2

AA Weighted R2: 0.94 k: 0.0198 dk: 0.00205

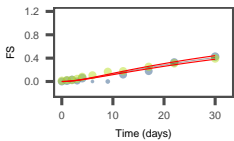

AA Unweighted R2: 0.92 k: 0.0192 dk: 0.00247

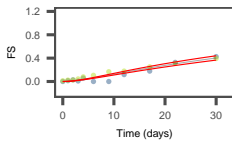

HW Weighted R2: 0.89 k: 0.0129 dk: 0.00207

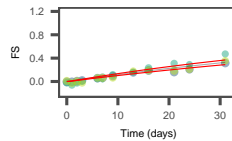

HW Unweighted R2: 0.88 k: 0.0131 dk: 0.00214

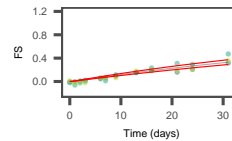

## PGBM

AA Weighted R2: 0.95 k: 0.017 dk: 0.00192

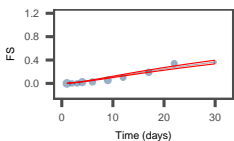

AA Unweighted R2: 0.95 k: 0.017 dk: 0.00192

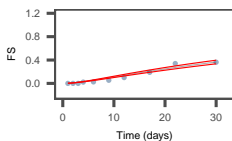

HW Weighted R2: 0.94 k: 0.0208 dk: 0.00244

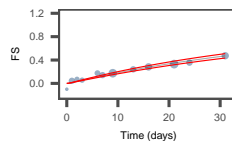

HW Unweighted R2: 0.94 k: 0.0208 dk: 0.0025

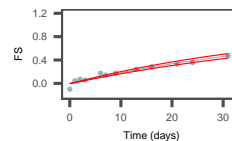

## PGK1

AA Weighted R2: 0.92 k: 0.0186 dk: 0.00219

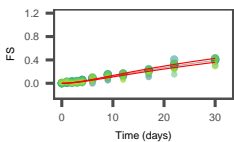

AA Unweighted R2: 0.9 k: 0.0176 dk: 0.00243

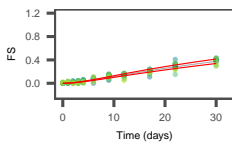

HW Weighted R2: 0.94 k: 0.0158 dk: 0.00164

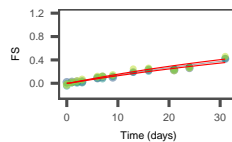

HW Unweighted R2: 0.94 k: 0.0159 dk: 0.00167

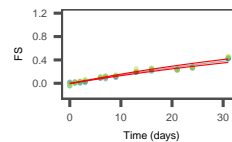

## PGM1

AA Weighted R2: 0.86 k: 0.0276 dk: 0.0052

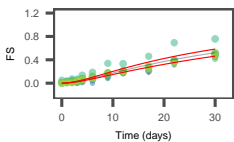

AA Unweighted R2: 0.86 k: 0.0266 dk: 0.00496

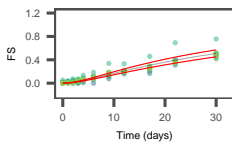

HW Weighted R2: 0.93 k: 0.019 dk: 0.00227

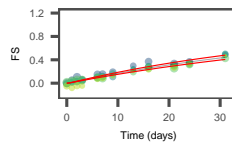

HW Unweighted R2: 0.93 k: 0.019 dk: 0.00228

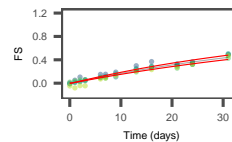

## PGS2

AA Weighted R2: 0.95 k: 0.15 dk: 0.0345

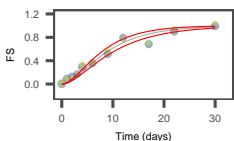

AA Unweighted R2: 0.95 k: 0.152 dk: 0.035

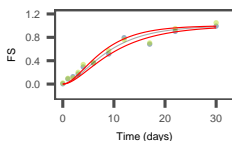

HW Weighted R2: 0.93 k: 0.06 dk: 0.0138

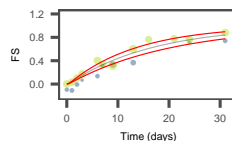

HW Unweighted R2: 0.92 k: 0.0572 dk: 0.014

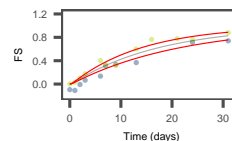

## PLEC

AA Weighted R2: 0.9 k: 0.0412 dk: 0.00865

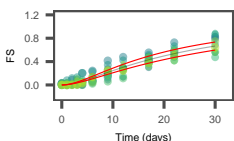

AA Unweighted R2: 0.9 k: 0.041 dk: 0.00864

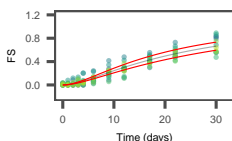

HW Weighted R2: 0.89 k: 0.0363 dk: 0.00783

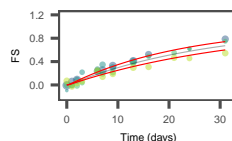

HW Unweighted R2: 0.88 k: 0.0371 dk: 0.0085

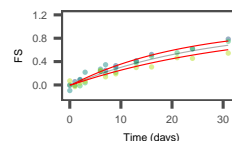



## PLIN4

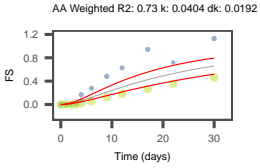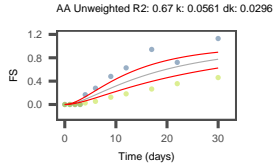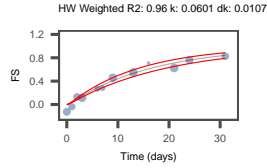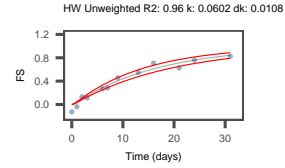

## PRDX2

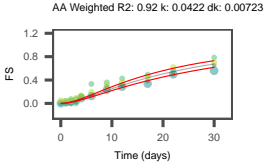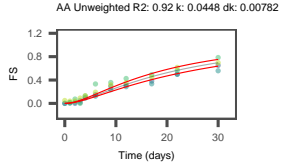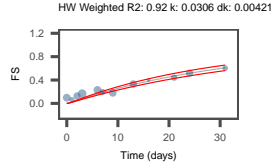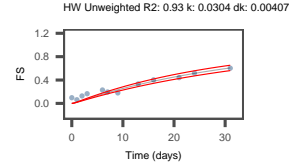

## PRDX3

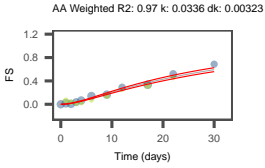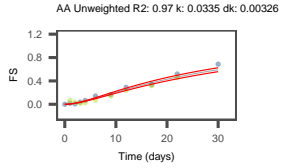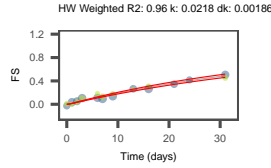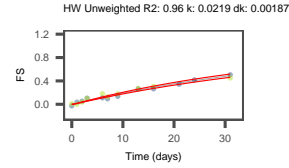

## PRDX6

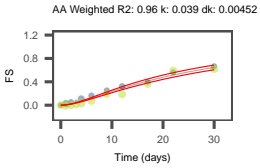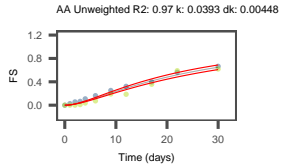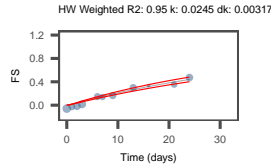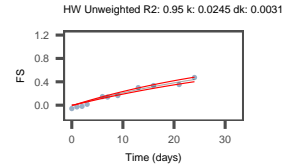

## PROF1

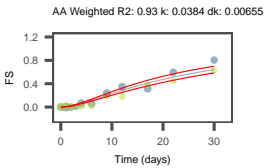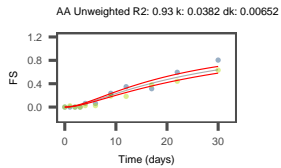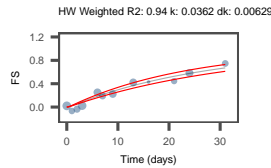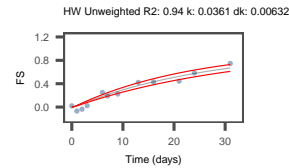

## PRVA

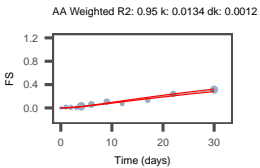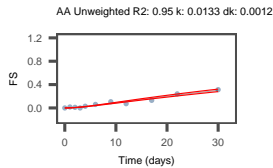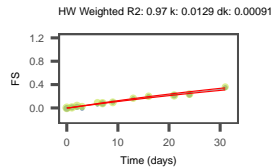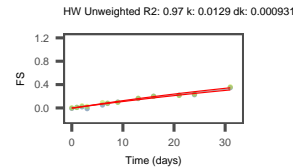

## PSA5

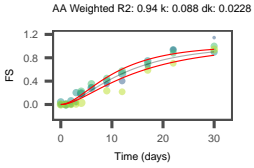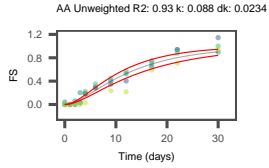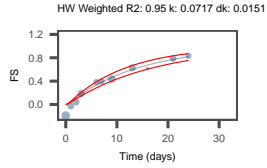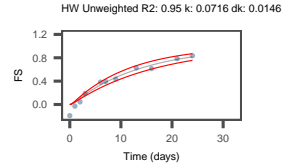

## PURA1

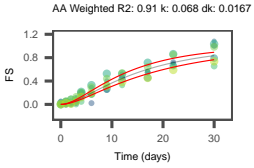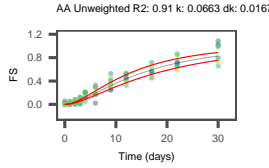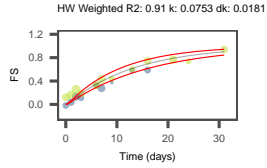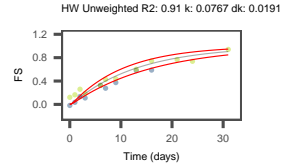

## PYGM

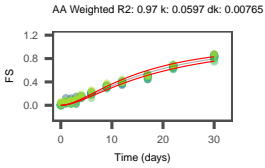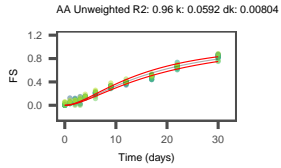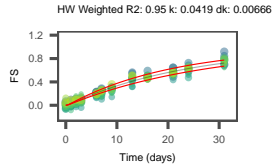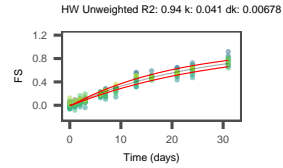

## QCR1

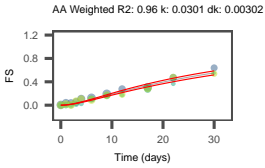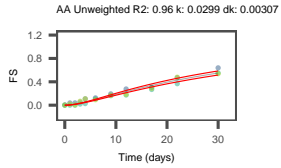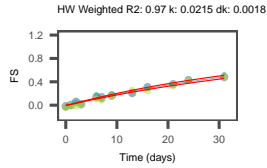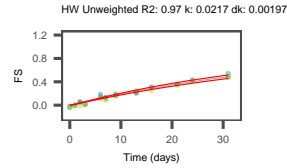

## QCR2

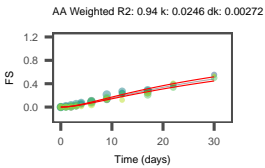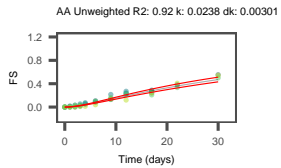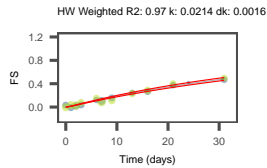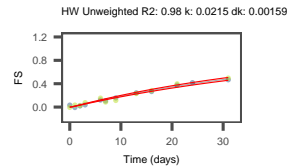

## RS10

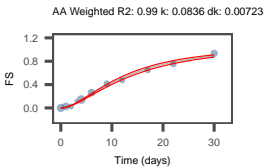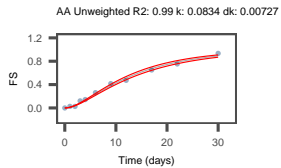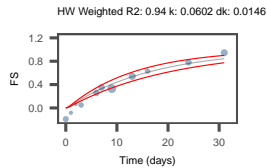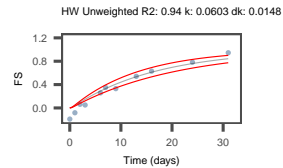

RS2

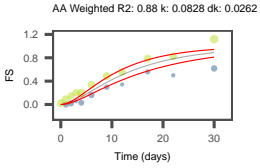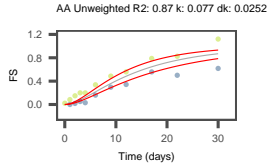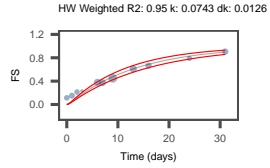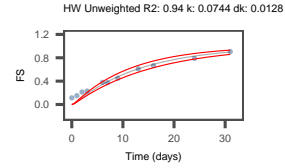

RS25

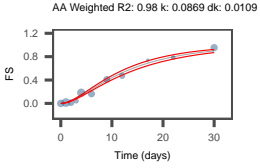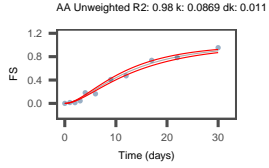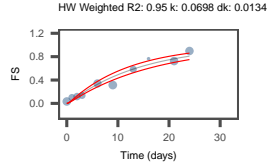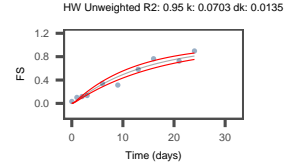

RS7

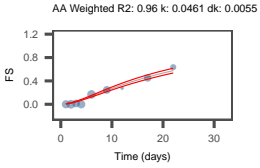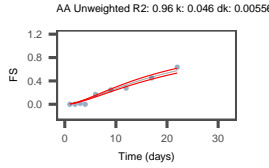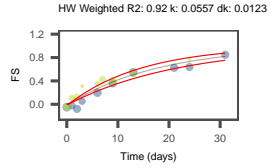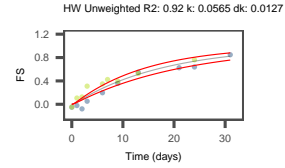

RTN2

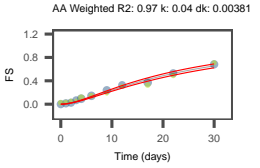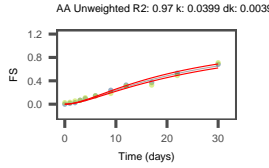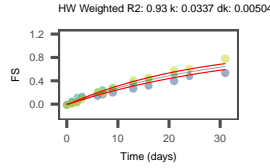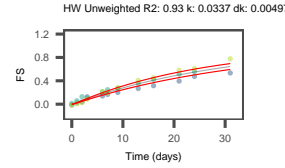

RYR1

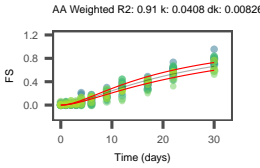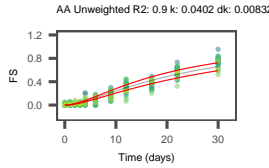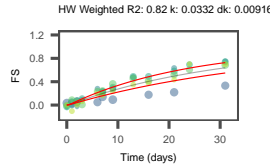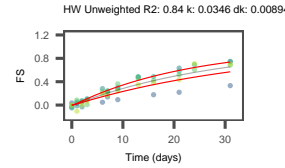

SCOT1

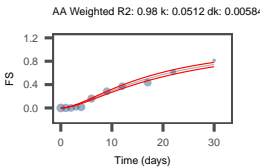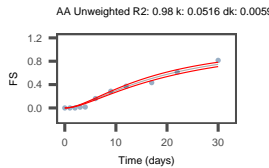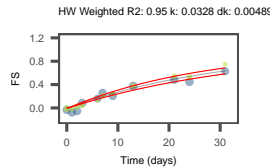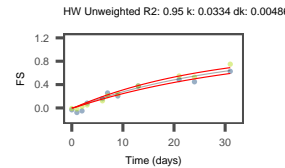

## SDHA

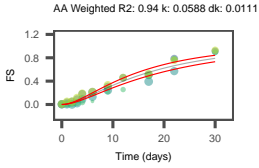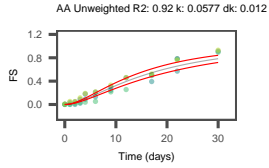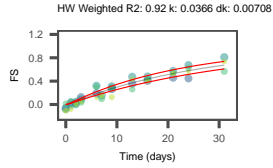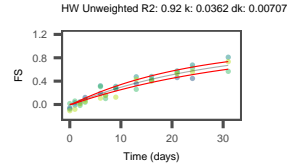

## SDHB

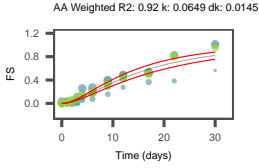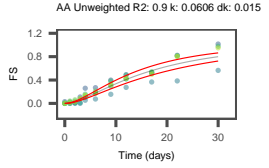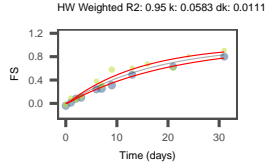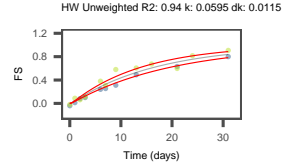

## SH3BG

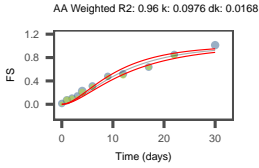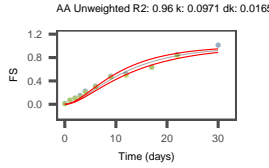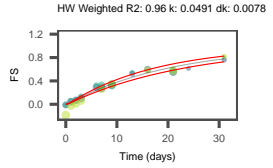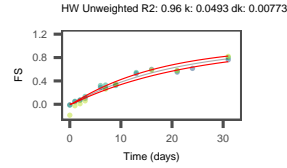

## SODC

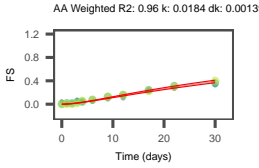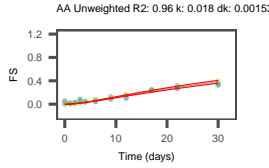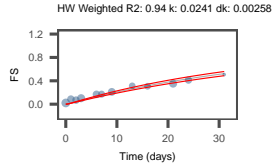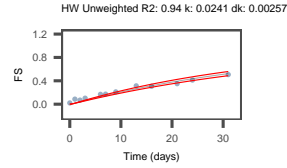

## SODM

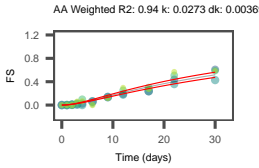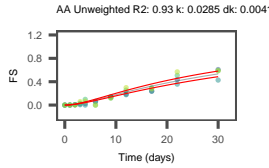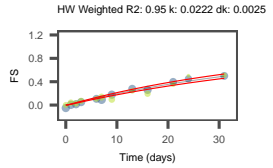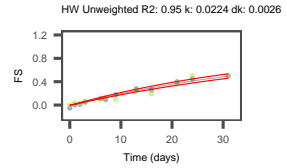

## SPB6

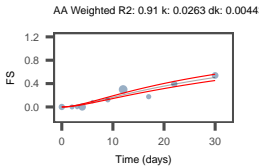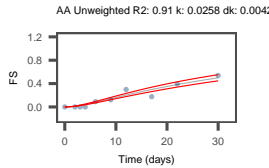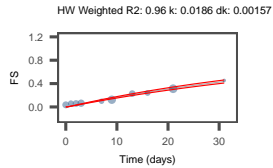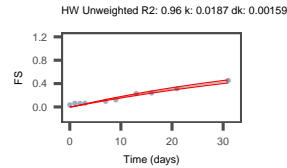

## SRCA

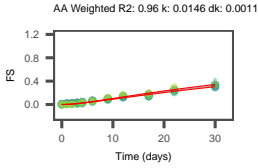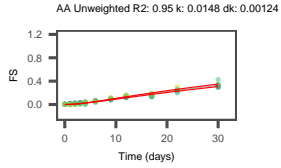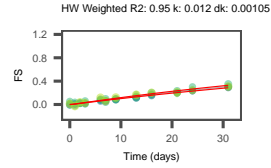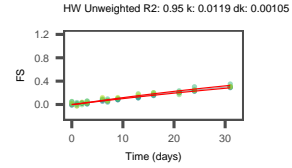

## SUCB1

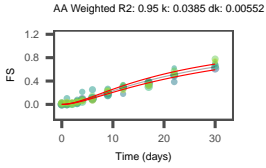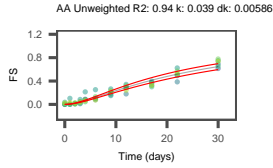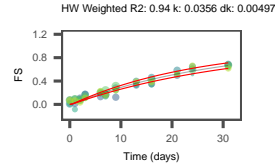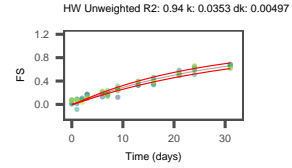

## SYNP2

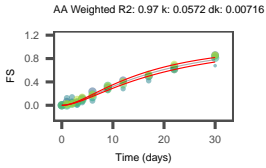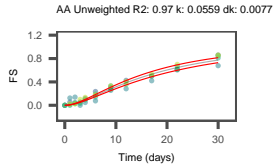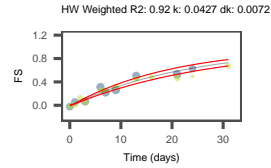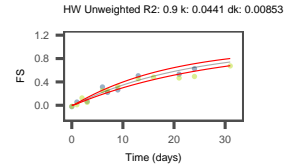

## TCTP

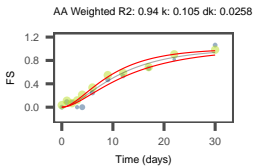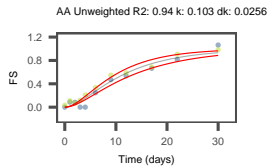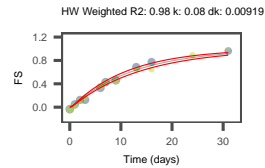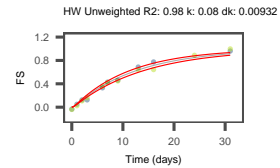

## TERA

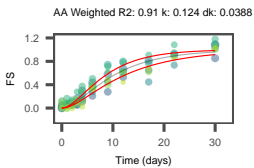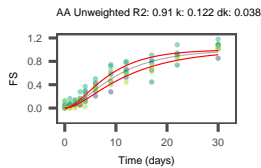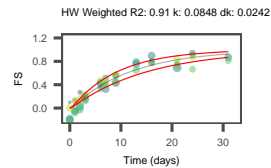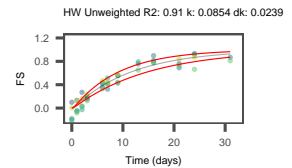

## THIL

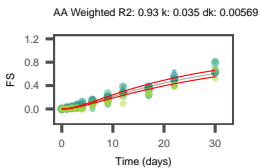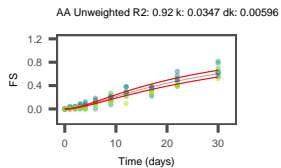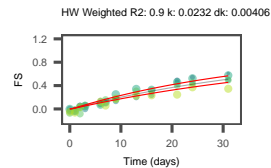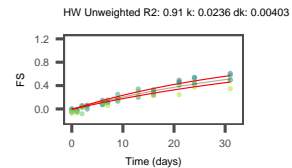

## THIM

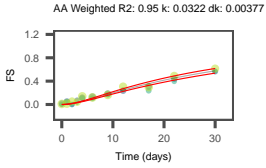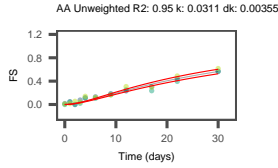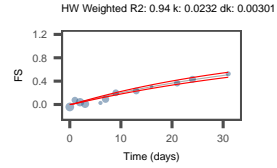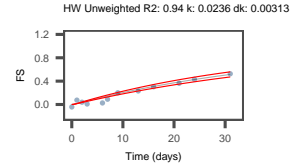

## TITIN

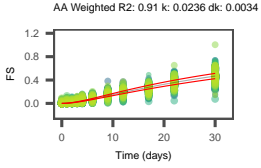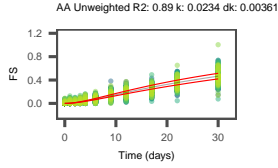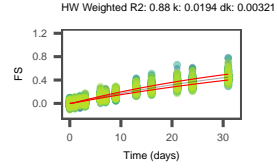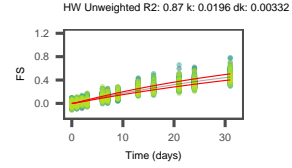

## TMOD4

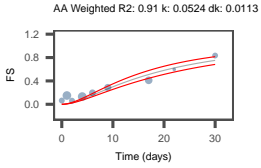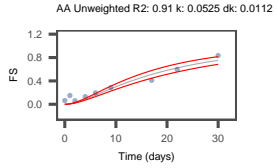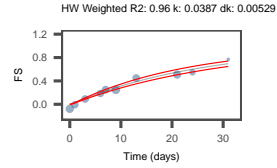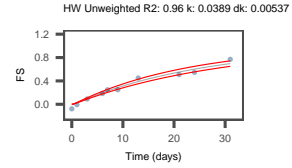

## TNNC2

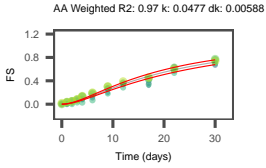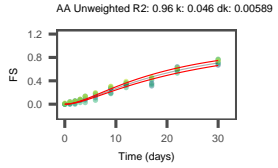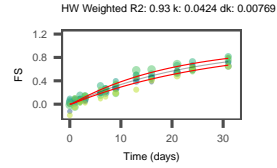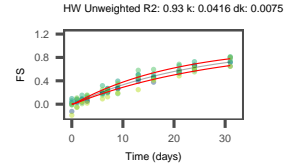

## TNNI2

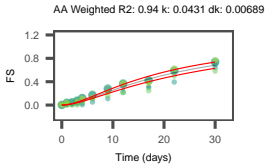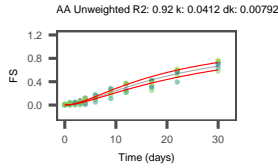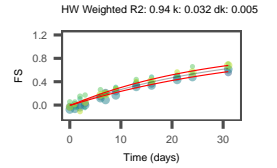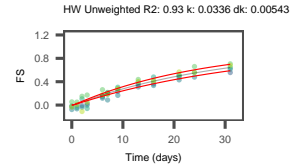

## TNNT3

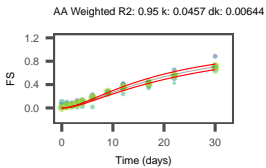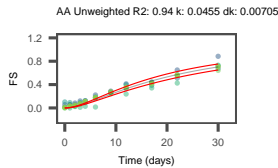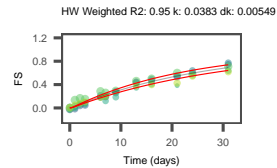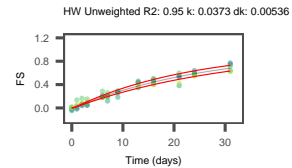

## TPIS

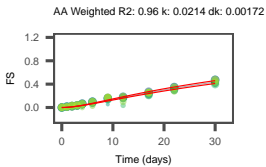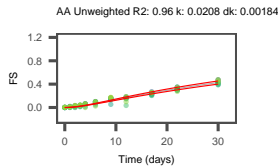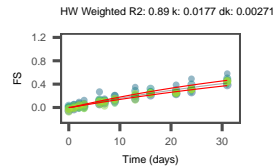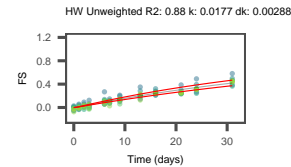

## TPM1

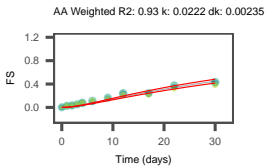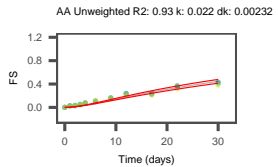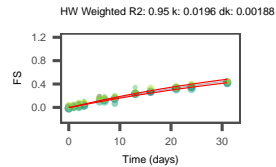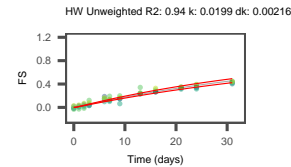

## TPM2

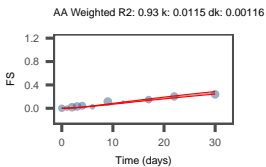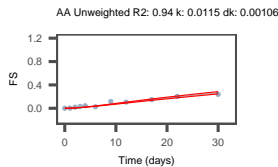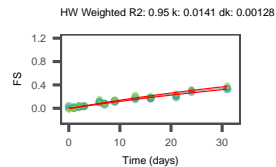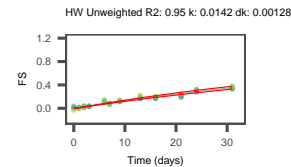

## TRFE

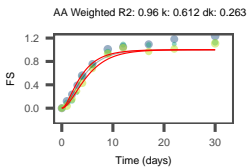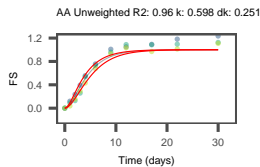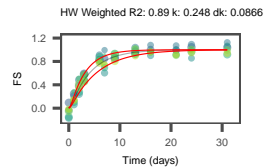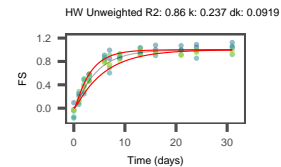

## UCRI

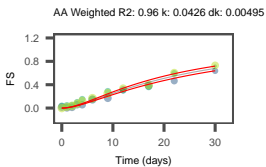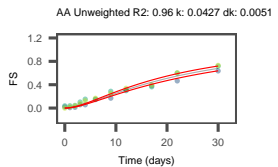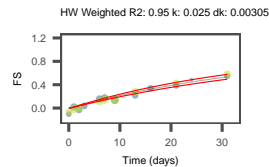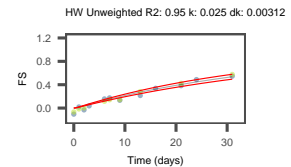

## UGPA

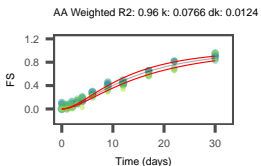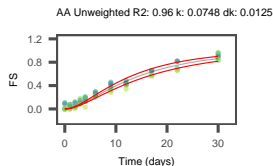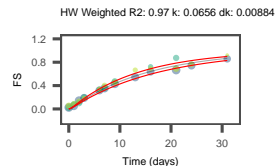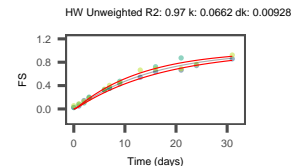

## VDAC1

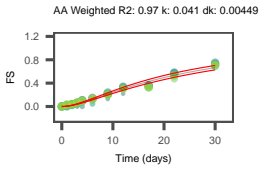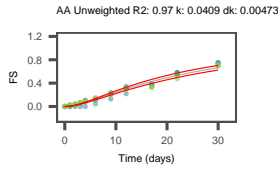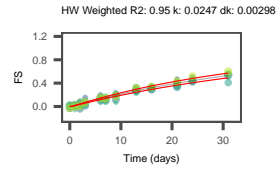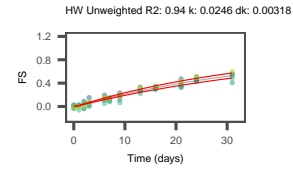

## VDAC2

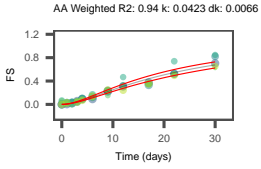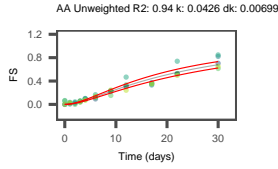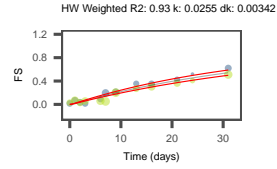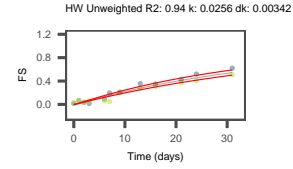

## VDAC3

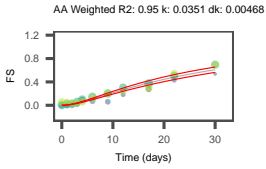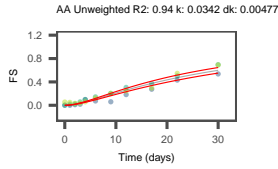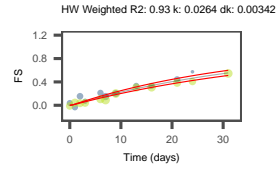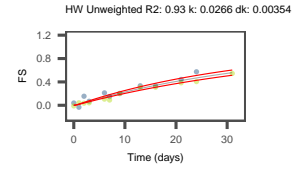

## VIME

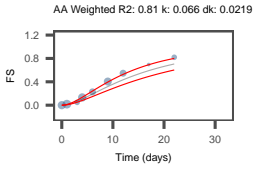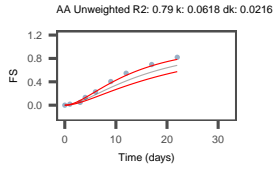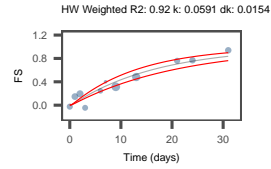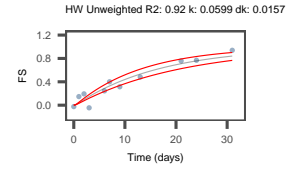

Supplement: mmc10.pdf [file mmc10.pdf]
